# Supplementary material for: The binding of reducible N2 in the reaction domain of nitrogenase
Source: Royal Society of Chemistry journal article supplement (doi:10.1039/d2dt03599e), 2023-01-01
Supplement: d2dt03599e1.pdf [file d2dt03599e1.pdf]

## **The binding of reducible N<sub>2</sub> in the reaction domain of nitrogenase.**

Ian Dance

School of Chemistry

UNSW Sydney, Australia

i.dance@unsw.edu.au

### **Supplementary Information**

#### **1. Protein model**

The quantum computed protein model is an extract from crystal 3U7Q, shown in Chart S1. The six principal chains surrounding FeMo-co are highlighted with different colours, and the connecting hydrogen bonds are marked. Homocitrate, the His442 ligation of Mo, and relevant nearby water molecules are included (486 atoms total). Details, and the rationale for inclusion of amino acids and for truncation of uninvolved sidechains, are provided in the caption for Chart S1. Investigations of the protonation state of homocitrate using crystal structures at various pH (summarised in ref<sup>1</sup>), vibrational circular dichroism spectroscopy,<sup>2</sup> QM/MM calculations,<sup>3,1</sup> and quantum refinement,<sup>3</sup> indicate that the coordinated alcoholate O atom is protonated. In the model used here this atom is not protonated. This difference is not expected to have significant consequences for the reaction steps of the mechanism described here because there are no potential hydrogen bonds or H transfer possibilities.

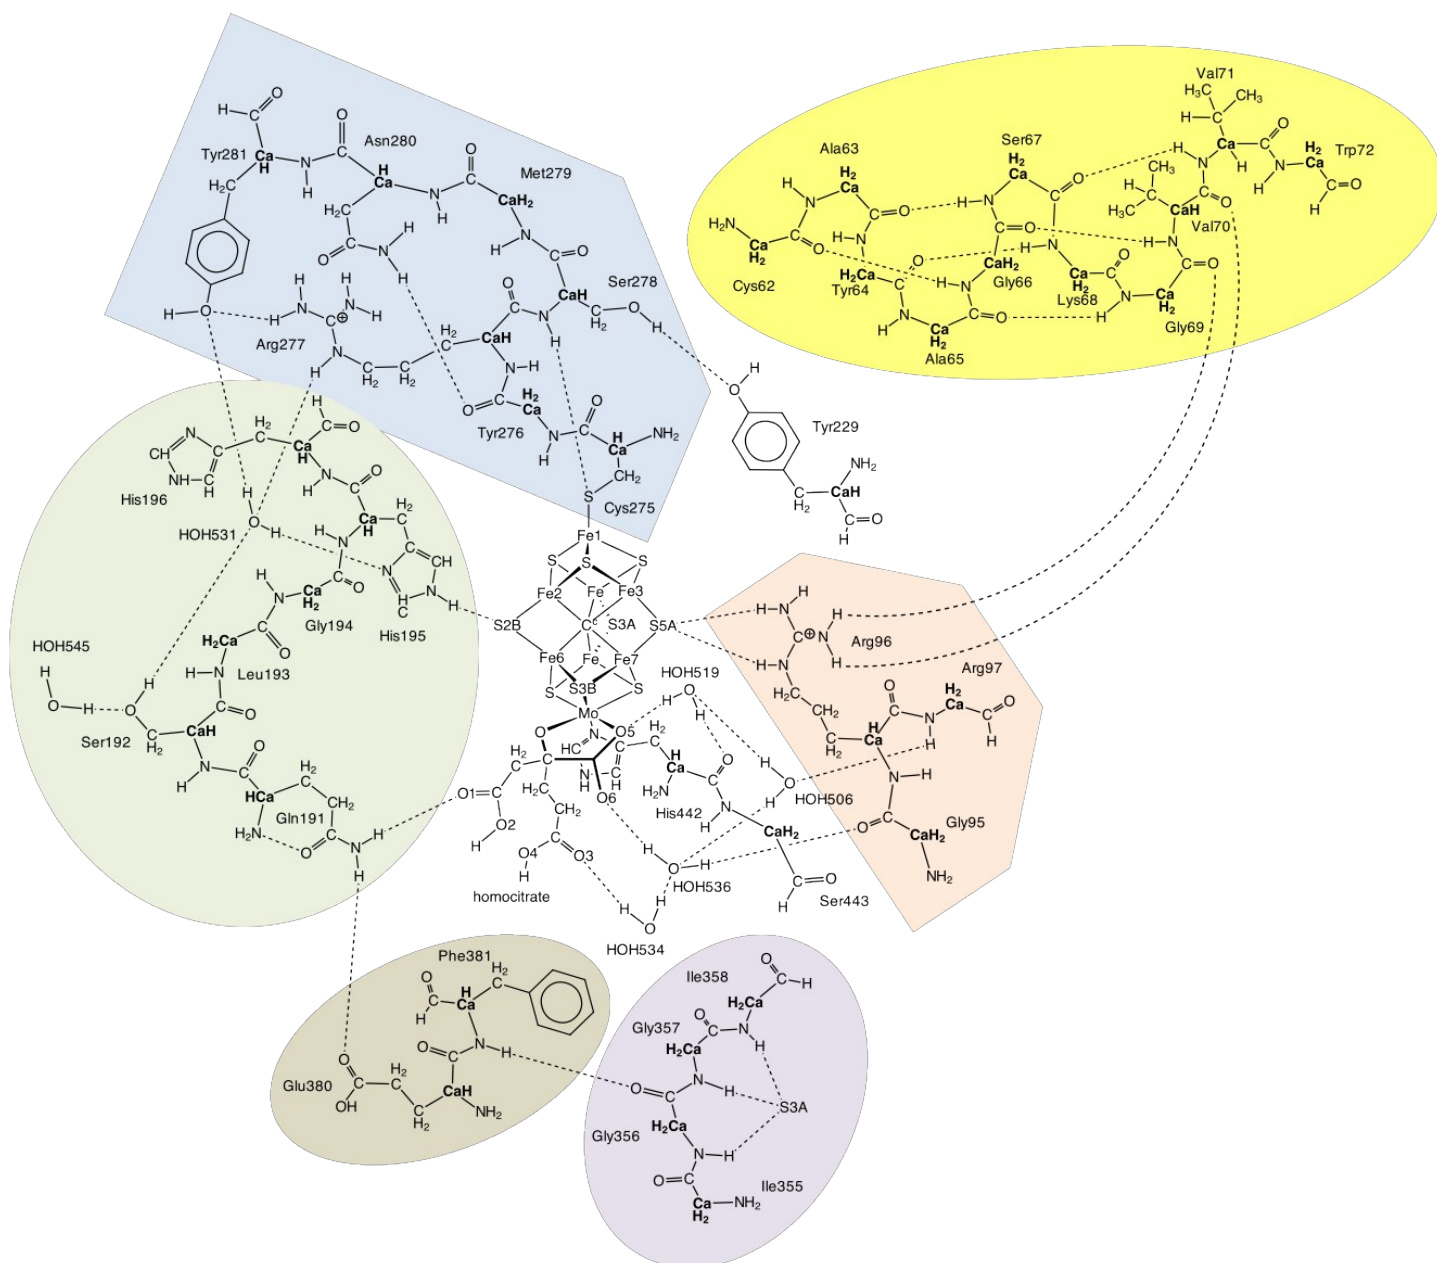

Chart S1. The quantum computed model, with residues and water molecules labelled according to *Azotobacter vinelandii* protein, crystal structure 3U7Q.  $\text{Ca}$  are labelled as Ca, and hydrogen bonds are broken lines. Non-influential sidechains are truncated to gly. In the ‘front’ chain (yellow highlight) that extends over the Fe2Fe3Fe6Fe7 face of FeMo-co the crucial residues Val70 and Val71 are complete, while 62, 63, 64, 65, 67, 68 and 72 are modelled as Gly. In the 191 to 196 chain (highlight green) the significant sidechains of Gln191, Ser193, His195 and His196 are complete. In the 275-281 chain (blue highlight) Cys275, Arg277, Ser278, Asn280, Tyr281 near the  $\text{N}_2$  pathway are complete: Tyr229 is included in full because it borders the reaction domain and has an important hydrogen bond with Ser278. In chain 95-97 (salmon highlight) the sidechain of Arg96 is included because it forms crucial hydrogen bonds with S5A, Gly69 and Val70: the sidechain of Arg97 is not nearby and is truncated to gly. In the rear chain (mauve highlight) with hydrogen bonds to S5A, Ile355 and Ile358 are truncated to gly. Glu380 and Phe381 (fawn highlight) are included in full. Ligand His442 is complete and Ser443 is truncated to gly. Homocitrate is complete. HOH531 has hydrogen bonds with two chains, Ser192, His195 and Arg277, Tyr281, and is part of the putative proton transfer from surface water (HOH545) to His195.<sup>4</sup>

The four penultimate waters of the proton wire<sup>5</sup> (HOH519, HOH506, HOH536 and HOH534) are included.

Experimental and computational studies are in general agreement that the redox level of the [CFe<sub>7</sub>MoS<sub>9</sub>] core of resting FeMo-co cluster is described by net charge -1,<sup>6,7,1,8</sup> and so the net charge for the complete model in Chart S1 is -2 (-1 when the His195 side chain is protonated).

## 2. Constraints on the computed protein

Some constraints on the protein structure are required during optimization calculations because the modelled protein is incomplete and the bonding and dispersion influences of the complete protein outside the computational model are absent. The modelled protein must also maintain flexibility sufficient to accommodate the coordination of N<sub>2</sub> and of H<sub>2</sub>, and the diffusion of these molecules to and from FeMo-co. The constraints used here involved the C $\alpha$  atoms at the ends of the modelled protein chains, allowing movement of the intermediate residues and all sidechains. The constraints maintained the crystallographic distances between C<sup>c</sup> at the centre of FeMo-co and the C $\alpha$  atoms of residues 62, 95, 97, 191, 196, 229, 281, 355, 358, 380, 381, 443, and included C<sup>c</sup> -- water distances. As previously explained<sup>9</sup> trial calculations on the modes of diffusion and coordination of N<sub>2</sub> / H<sub>2</sub> led to the conclusion that the front chain near Val70 should move about 1Å away from FeMo-co. This is consistent with experimental data on mutation of amino acid 70 with smaller and larger side chains.<sup>10-12</sup> Therefore the C $\alpha$ (Trp72)-C<sup>c</sup> distance was constrained to 14.1Å (13.08Å in the resting protein structure), and the C $\alpha$ (Val70)-C<sup>c</sup> distance to 8.6Å (7.22Å in the resting protein). The lengths of the hydrogen bonds between the backside water HOH531 and Arg277, Tyr281 and Ser192 (Chart S1) were also constrained.

## 3. Density functional procedures

Density functional (DF) calculations use the DMol methodology of Delley,<sup>13-18</sup> with accurate DNP (double numerical plus polarisation) basis sets.<sup>16</sup> The real-space cutoff in the calculation of atomic basis sets was 9 au (4.76Å), which gives results within 0.1% of the limit for larger extensions of the basis sets. The gradient-corrected functional PBE<sup>19</sup> was used because validation tests demonstrate that it is more accurate than other commonly used functionals when used with DMol.<sup>20</sup> See ref<sup>9</sup> for results describing the accuracy with which the PBE/DMol method reproduces experimental enthalpy data on the binding of N<sub>2</sub>. The calculations were all-electron, spin-unrestricted, with no imposed symmetry. The conductor-like screening model (COSMO)<sup>21-23</sup> was used with a dielectric constant of 5. Constraints on interatomic distances used the Lagrange Multiplier Algorithm. Control of electronic states was via the input spin populations for Fe1, Fe3, Fe4, Fe5 and Fe7. Output spin populations are calculated by the Mulliken method.<sup>24</sup>

## 4. Preferred electronic states

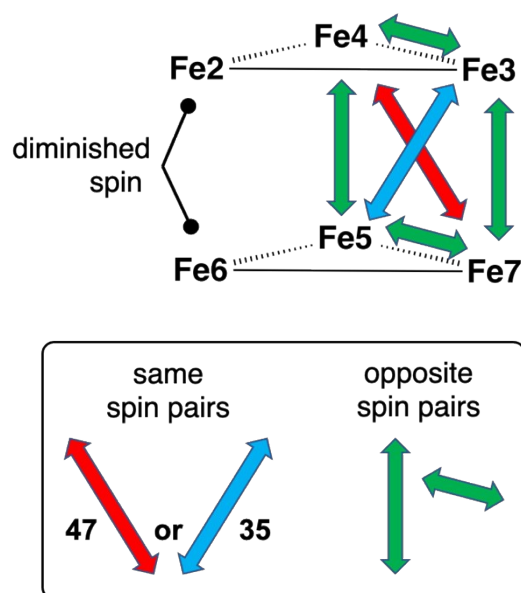

Chart S2. When the spin populations of Fe2 and Fe6 are diminished due to ligation, there are two pairs of negative spin, red *or* blue, that yield four oppositely signed (green) spin pairs along the shorter edges of the Fe3, Fe4, Fe5, Fe7 face where the spin populations have largest magnitude.

## 5. Distances for N<sub>2</sub> bound structures

Table S1. Non-bonding distances (Å)

|                             | Structure          | Fe2-Fe6 | Fe2-S2B | Fe6-S3B | Structure          | Fe2-Fe6 | Fe2-S2B | Fe6-S3B |
|-----------------------------|--------------------|---------|---------|---------|--------------------|---------|---------|---------|
| Fe-N <sub>2</sub>           | His                |         |         |         | His <sup>+</sup>   |         |         |         |
| <b>A hooked S2BH only</b>   |                    |         |         |         |                    |         |         |         |
| Fe2-N <sub>2</sub>          | <b>1</b> , 47(2)   | 2.75    |         |         | <b>2</b> , 47(2)   | 2.76    |         |         |
|                             |                    |         |         |         | <b>2</b> , 35(2)   | 2.77    |         |         |
| Fe6-N <sub>2</sub>          | <b>3</b> , 47(2)   | 2.77    |         |         |                    |         |         |         |
| <b>B unhooked S2BH only</b> |                    |         |         |         |                    |         |         |         |
| Fe2-N <sub>2</sub>          | <b>9</b> , 35(1)   | 2.97    |         |         | <b>10</b> , 47(2)  | 2.89    | 3.22    |         |
|                             |                    |         |         |         | <b>10</b> , 35(1)  | 2.96    | 3.64    |         |
| Fe6-N <sub>2</sub>          | <b>11</b> , 35(1)  | 2.78    |         |         | <b>12</b> , 47(2)  | 2.78    | 4.03    |         |
|                             |                    |         |         |         | <b>12</b> , 35(1)  | 2.77    | 4.08    |         |
| <b>C hooked S2HB + 6Hx</b>  |                    |         |         |         |                    |         |         |         |
| Fe2-N <sub>2</sub>          | <b>5</b> , 47(1/2) | 3.05    |         |         | <b>6</b> , 47(1/2) | 3.07    |         |         |
|                             | <b>5</b> , 47(3/2) | 3.05    |         |         | <b>6</b> , 47(3/2) | 3.06    |         |         |
|                             | <b>5</b> , 47(5/2) | 3.14    |         |         | <b>6</b> , 35(3/2) | 3.04    |         |         |
|                             | <b>5</b> , 35(3/2) | 3.20    |         |         | <b>6</b> , 35(5/2) | 3.04    |         |         |
|                             | <b>5</b> , 35(5/2) | 3.07    |         |         |                    |         |         |         |
| Fe6-N <sub>2</sub>          | <b>7</b> , 47(5/2) | 3.10    |         |         | <b>8</b> , 47(3/2) | 3.30    |         |         |
|                             | <b>7</b> , 35(3/2) | 3.13    |         |         | <b>8</b> , 35(3/2) | 3.27    |         |         |

| <b>D unhooked S2HB + Fe2-H-Fe6</b>       |                     |      |      |      |                     |      |      |      |
|------------------------------------------|---------------------|------|------|------|---------------------|------|------|------|
| Fe2-N <sub>2</sub>                       | <b>13</b> , 47(3/2) | 2.74 | 3.76 |      | <b>14</b> , 47(3/2) | 2.75 | 3.81 |      |
|                                          | <b>13</b> , 47(5/2) | 2.74 | 3.84 |      | <b>14</b> , 35(3/2) | 2.73 | 3.85 |      |
|                                          | <b>13</b> , 35(3/2) | 2.74 | 3.81 |      |                     |      |      |      |
| Fe6-N <sub>2</sub>                       | <b>15</b> , 47(3/2) | 2.70 | 4.16 |      | <b>16</b> , 47(3/2) | 2.69 | 4.13 |      |
|                                          |                     |      |      |      | <b>16</b> , 35(1/2) | 2.70 | 4.15 |      |
|                                          |                     |      |      |      |                     |      |      |      |
| <b>E unhooked S2HB + 3b2</b>             |                     |      |      |      |                     |      |      |      |
| Fe2-N <sub>2</sub>                       | <b>17</b> , 47(5/2) | 2.87 | 3.62 | 2.52 | <b>18</b> , 47(3/2) | 2.89 | 3.67 | 2.59 |
|                                          |                     |      |      |      | <b>18</b> , 47(5/2) | 2.88 | 3.63 | 2.61 |
| Fe6-N <sub>2</sub>                       | <b>19</b> , 47(3/2) | 2.65 |      |      | <b>20</b> , 47(3/2) | 2.67 | 3.98 | 2.65 |
|                                          |                     |      |      |      | <b>20</b> , 35(1/2) | 2.64 | 4.03 | 2.73 |
|                                          |                     |      |      |      | <b>20</b> , 35(3/2) | 2.64 | 4.01 | 2.73 |
|                                          |                     |      |      |      |                     |      |      |      |
| <b>F unhooked S2HB + 3b2 + Fe2-H-Fe6</b> |                     |      |      |      |                     |      |      |      |
| Fe2-N <sub>2</sub>                       | <b>21</b> , 47(1)   | 2.68 | 3.91 | 2.93 | <b>22</b> , 47(2)   | 2.65 | 3.95 | 3.11 |
|                                          | <b>21</b> , 47(2)   | 2.68 | 3.92 | 2.97 | <b>22</b> , 35(2)   | 2.66 | 3.91 | 2.99 |
| Fe6-N <sub>2</sub>                       | <b>23</b> , 47(1)   | 2.64 | 4.26 | 2.75 | <b>24</b> , 47(1)   | 2.63 | 4.24 | 2.63 |
|                                          | <b>23</b> , 35(2)   | 2.66 | 4.29 | 2.83 | <b>24</b> , 47(2)   | 2.63 | 4.21 | 2.58 |
|                                          |                     |      |      |      | <b>24</b> , 35(2)   | 2.65 | 4.24 | 2.66 |

**Table S2. Fe-N, N-N distances (Å)**

| Structure          | <i>endo</i> N <sub>2</sub> binding |      | <i>exo</i> -Fe2 N <sub>2</sub> binding |      |
|--------------------|------------------------------------|------|----------------------------------------|------|
|                    | Fe-N                               | N-N  | Fe-N                                   | N-N  |
| <b>1</b> , 47(2)   | 1.83                               | 1.12 | 1.85                                   | 1.12 |
| <b>2</b> , 47(2)   | 1.85                               | 1.12 | 1.84                                   | 1.13 |
| <b>2</b> , 35(2)   | 1.85                               | 1.12 | 1.84                                   | 1.13 |
| <b>3</b> , 47(2)   | 1.80                               | 1.13 | 1.79                                   | 1.13 |
| <b>9</b> , 35(1)   | 1.83                               | 1.13 | 1.83                                   | 1.13 |
| <b>10</b> , 47(2)  | 1.83                               | 1.12 | 1.83                                   | 1.13 |
| <b>10</b> , 35(1)  | 1.83                               | 1.13 | 1.82                                   | 1.13 |
| <b>11</b> , 35(1)  | 1.80                               | 1.13 | 1.80                                   | 1.13 |
| <b>12</b> , 47(2)  | 1.81                               | 1.13 | 1.80                                   | 1.14 |
| <b>12</b> , 35(1)  | 1.80                               | 1.13 | 1.79                                   | 1.14 |
| <b>5</b> , 47(1/2) | 1.84                               | 1.12 | 1.84                                   | 1.13 |
| <b>5</b> , 47(3/2) | 1.85                               | 1.12 | 1.85                                   | 1.13 |
| <b>5</b> , 47(5/2) | 1.84                               | 1.12 | 1.84                                   | 1.13 |
| <b>5</b> , 35(3/2) | 1.84                               | 1.12 | 1.85                                   | 1.12 |

|                     |      |      |      |      |
|---------------------|------|------|------|------|
| <b>5</b> , 35(5/2)  | 1.84 | 1.12 | 1.85 | 1.12 |
| <b>6</b> , 47(1/2)  | 1.83 | 1.12 | 1.83 | 1.13 |
| <b>6</b> , 47(3/2)  | 1.84 | 1.12 | 1.84 | 1.13 |
| <b>6</b> , 35(3/2)  | 1.83 | 1.12 | 1.84 | 1.13 |
| <b>6</b> , 35(5/2)  | 1.84 | 1.12 | 1.85 | 1.13 |
| <b>7</b> , 47(5/2)  | 1.82 | 1.13 | 1.80 | 1.13 |
| <b>7</b> , 35(3/2)  | 1.81 | 1.13 | 1.80 | 1.14 |
| <b>8</b> , 47(3/2)  | 1.82 | 1.13 | 1.80 | 1.14 |
| <b>8</b> , 35(3/2)  | 1.81 | 1.13 | 1.80 | 1.14 |
| <b>13</b> , 47(3/2) | 1.84 | 1.12 | 1.84 | 1.13 |
| <b>14</b> , 47(3/2) | 1.85 | 1.12 | 1.82 | 1.13 |
| <b>14</b> , 35(3/2) | 1.85 | 1.12 | 1.84 | 1.13 |
| <b>15</b> , 47(3/2) | 1.80 | 1.13 | 1.80 | 1.13 |
| <b>16</b> , 47(3/2) | 1.81 | 1.13 | 1.79 | 1.13 |
| <b>16</b> , 35(1/2) | 1.80 | 1.13 | 1.81 | 1.13 |
| <b>17</b> , 47(5/2) | 1.80 | 1.13 | 1.83 | 1.13 |
| <b>18</b> , 47(3/2) | 1.82 | 1.13 | 1.82 | 1.13 |
| <b>18</b> , 47(5/2) | 1.81 | 1.13 | 1.81 | 1.13 |
| <b>19</b> , 47(3/2) | 1.78 | 1.13 | 1.79 | 1.13 |
| <b>20</b> , 47(3/2) | 1.79 | 1.13 | 1.78 | 1.14 |
| <b>20</b> , 35(1/2) | 1.79 | 1.13 | 1.79 | 1.14 |
| <b>20</b> , 35(3/2) | 1.79 | 1.13 | 1.79 | 1.14 |
| <b>21</b> , 47(1)   | 1.82 | 1.13 | 1.83 | 1.13 |
| <b>21</b> , 47(2)   | 1.82 | 1.13 | 1.83 | 1.13 |
| <b>22</b> , 47(2)   | 1.82 | 1.13 | 1.82 | 1.13 |
| <b>22</b> , 35(2)   | 1.82 | 1.13 | 1.82 | 1.13 |
| <b>23</b> , 47(1)   | 1.80 | 1.13 | 1.81 | 1.13 |
| <b>23</b> , 35(2)   | 1.80 | 1.13 | 1.81 | 1.13 |
| <b>24</b> , 47(1)   | 1.81 | 1.13 | 1.79 | 1.14 |
| <b>24</b> , 47(2)   | 1.82 | 1.13 | 1.80 | 1.14 |
| <b>24</b> , 35(2)   | 1.81 | 1.13 | 1.79 | 1.14 |

## 6. References

- <sup>1</sup> B. Benediktsson and R. Bjornsson, *Inorganic Chemistry*, 2017, **56**, 13417-13429. 10.1021/acs.inorgchem.7b02158
- <sup>2</sup> L. Deng, H. Wang, C. H. Dapper, W. E. Newton, S. Shilov, S. Wang, S. P. Cramer and Z.-H. Zhou, *Communications Chemistry*, 2020, **3**, 145. 10.1038/s42004-020-00392-z
- <sup>3</sup> L. Cao, O. Caldararu and U. Ryde, *The Journal of Physical Chemistry B*, 2017, **121**, 8242-8262. 10.1021/acs.jpcc.7b02714

- 4 I. Dance, *Journal of Inorganic Biochemistry*, 2017, **169**, 32-43. 10.1016/j.jinorgbio.2017.01.005
- 5 I. Dance, *Dalton Transactions*, 2015, **44**, 18167-18186. 10.1039/C5DT03223G
- 6 T. Spatzal, J. Schlesier, E.-M. Burger, D. Sippel, L. Zhang, S. L. A. Andrade, D. C. Rees and O. Einsle, *Nat Commun*, 2016, **7**, 10902. 10.1038/ncomms10902
- 7 R. Bjornsson, F. Neese and S. DeBeer, *Inorganic Chemistry*, 2017, **56**, 1470-1477. 10.1021/acs.inorgchem.6b02540
- 8 I. Dance, *Chembiochem*, 2020, **21**, 1671-1709. 10.1002/cbic.201900636
- 9 I. Dance, *Dalton Transactions*, 2021, **50**, 18212-18237. 10.1039/d1dt03548g.
- 10 P. C. Dos Santos, R. Igarashi, H.-I. Lee, B. M. Hoffman, L. C. Seefeldt and D. R. Dean, *Acc. Chem. Res.*, 2005, **38**, 208-214.
- 11 L. C. Seefeldt, B. M. Hoffman and D. R. Dean, *Annu. Rev. Biochem.*, 2009, **78**, 701-722.
- 12 R. Sarma, B. M. Barney, S. Keable, D. R. Dean, L. C. Seefeldt and J. W. Peters, *J. Inorg. Biochem.*, 2010, **104**, 385-389.
- 13 B. Delley, *J. Chem. Phys.*, 1990, **92**, 508-517.
- 14 B. Delley, in *Modern density functional theory: a tool for chemistry*, eds. J. M. Seminario and P. Politzer, Elsevier, Amsterdam, 1995, p. 221-254
- 15 J. Baker, A. Kessi and B. Delley, *The Journal of Chemical Physics*, 1996, **105**, 192-212. doi:<http://dx.doi.org/10.1063/1.471864>
- 16 B. Delley, *J. Chem. Phys.*, 2000, **113**, 7756-7764.
- 17 J. Andzelm, R. D. King-Smith and G. Fitzgerald, *Chemical Physics Letters*, 2001, **335**, 321-326. [http://dx.doi.org/10.1016/S0009-2614\(01\)00030-6](http://dx.doi.org/10.1016/S0009-2614(01)00030-6)
- 18 T. Todorova and B. Delley, *The Journal of Physical Chemistry C*, 2010, **114**, 20523-20530. 10.1021/jp1049759
- 19 J. P. Perdew, K. Burke and M. Ernzerhof, *Phys. Rev. Lett.*, 1996, **77**, 3865-3868.
- 20 I. Dance, *Molecular Simulation*, 2018, **44**, 568-581. doi.org/10.1080/08927022.2017.1413711
- 21 J. Andzelm, C. Kolmel and A. Klamt, *J. Chem. Phys.*, 1995, **103**, 9312-9320.
- 22 A. Klamt, V. Jonas, T. Burger and J. C. W. Lohrenz, *J. Phys. Chem. A*, 1998, **102**, 5074-5085.
- 23 B. Delley, *Molecular Simulation*, 2006, **32**, 117-123.
- 24 R. S. Mulliken, *J. Chem. Phys.*, 1955, **23**, 1833-1846.

## 7 Coordinates and spin populations for N<sub>2</sub> bound structures

| structure, spin populations | filename, coordinates                     |
|-----------------------------|-------------------------------------------|
| <b>1, 47(2)</b>             | <b>bm12b2n2x2n2n47.car_3</b>              |
| Fe1 3.19                    | C1 -7.737101523 -5.428006885 1.000967941  |
| Fe2 0.06                    | C2 -7.793593321 -6.751877513 0.232341760  |
| Fe3 2.94                    | C3 -8.938811243 -3.372885836 1.611735901  |
| Fe4 -2.67                   | C4 -8.693094133 -3.362372836 3.117840502  |
| Fe5 2.26                    | C5 -8.850897006 -4.558795197 5.241291113  |
| Fe6 -0.11                   | C6 -7.366019279 -4.664001527 5.608955447  |
| Fe7 -2.22                   | C7 -5.132253945 -5.362675996 4.884011199  |
|                             | C8 -4.447241041 -4.016175995 4.631145124  |
|                             | C9 -4.354673672 -1.975332987 3.300007321  |
|                             | C10 -4.644426338 -0.961120919 4.417116173 |
|                             | C11 -6.184535943 -0.151921482 6.109474793 |

|     |               |              |              |
|-----|---------------|--------------|--------------|
| C12 | -5.490305060  | -0.485903455 | 7.438021031  |
| C13 | -5.028583309  | -2.206282123 | 9.119792658  |
| C14 | -3.535602516  | -2.520355965 | 9.268830221  |
| C15 | -1.511596306  | -3.432733345 | 8.212248352  |
| C16 | -0.505725523  | -2.522310621 | 7.500095188  |
| C17 | -0.255484169  | -0.528731994 | 6.033458606  |
| C18 | -0.386718781  | 0.865936586  | 6.669074290  |
| C19 | -0.605291147  | -0.564561626 | 4.524870985  |
| C20 | 0.021083493   | 0.627387869  | 3.794501072  |
| C21 | -0.189294563  | -1.909839545 | 3.918970192  |
| C22 | -1.779942367  | 2.849821276  | 7.034389625  |
| C23 | -1.861701298  | 2.879037650  | 8.570069338  |
| C24 | -2.992003794  | 3.526932822  | 6.351539906  |
| C25 | -3.256145406  | 4.916776935  | 6.940896117  |
| C26 | -2.775111050  | 3.630297536  | 4.834263206  |
| C27 | -2.784305816  | 1.918865530  | 10.597163297 |
| C28 | -1.445973167  | 1.878671618  | 11.304425242 |
| C29 | 5.516735503   | -9.959859741 | 7.251641425  |
| C30 | 6.115797202   | -8.865761207 | 6.365798092  |
| C31 | 6.337741678   | -6.382479265 | 6.168952743  |
| C32 | 7.377321010   | -5.734684747 | 7.102624709  |
| C33 | 5.147004391   | -5.448332636 | 5.892754652  |
| C34 | 5.551289761   | -4.110670028 | 5.268120370  |
| C35 | 4.339446926   | -3.388274801 | 4.672119727  |
| C36 | 4.396278014   | -0.895983800 | 4.439241715  |
| C37 | 9.642757439   | -4.815912836 | 7.268546571  |
| C38 | 9.860458657   | -3.346118579 | 6.980631711  |
| C39 | -4.962995397  | -3.132971694 | -1.730827418 |
| C40 | -5.441659076  | -1.673449134 | -1.664144342 |
| C41 | -3.443238314  | -3.147163009 | -1.448393217 |
| C42 | -2.815892072  | -4.521840454 | -1.124766359 |
| C43 | -2.326740100  | -5.322602937 | -2.330872737 |
| C44 | -5.897536657  | 0.323717617  | -3.056191974 |
| C45 | -7.214412589  | 0.809968364  | -2.456601096 |
| C46 | -5.723008851  | 0.642069431  | -4.566820392 |
| C47 | -9.384961837  | 0.183312767  | -1.510254895 |
| C48 | -9.158815326  | 0.593284526  | -0.048244321 |
| C49 | -7.617293795  | 0.672968765  | 1.855323357  |
| C50 | -6.563375112  | 1.768280101  | 2.027442389  |
| C51 | -4.930691134  | 3.284760894  | 1.001880087  |
| C52 | -5.533890257  | 4.664739056  | 1.327052136  |
| C53 | -4.171593362  | 3.452903541  | -0.324818811 |
| C54 | -3.386819309  | 2.282659876  | -0.837266848 |
| C55 | -2.839961303  | 1.188839284  | -0.201207276 |
| C56 | -2.293367677  | 1.152808255  | -2.346737919 |
| C57 | -7.396914883  | 6.190340607  | 0.797031309  |
| C58 | -7.608241841  | 6.662044546  | 2.232271939  |
| C59 | -8.749796886  | 6.060447365  | 0.058219516  |
| C60 | -9.331961005  | 7.330420261  | -0.488375795 |
| C61 | -9.439196845  | 8.591491023  | 0.064756502  |
| C62 | -10.347007747 | 8.556780028  | -1.956316110 |
| C63 | 8.462725775   | 2.767663150  | 4.452771987  |
| C64 | 9.451272511   | 1.637728891  | 4.675538356  |
| C65 | 7.089234769   | 2.112937288  | 4.174824663  |
| C66 | 5.974853244   | 3.119250171  | 4.005233928  |
| C67 | 5.220264528   | 3.575282181  | 5.101902562  |
| C68 | 5.648395956   | 3.616057882  | 2.730178584  |
| C69 | 4.176784222   | 4.493649442  | 4.934494298  |
| C70 | 4.621177965   | 4.542008390  | 2.549294096  |
| C71 | 3.879475254   | 4.973330995  | 3.651939461  |
| C72 | 5.514857584   | 7.010542459  | -1.883459317 |
| C73 | 4.496467518   | 7.915900213  | -2.587550347 |



|      |              |              |              |
|------|--------------|--------------|--------------|
| C74  | 4.825194281  | 5.731848276  | -1.379738361 |
| C75  | 3.669639400  | 8.760108821  | -4.744773929 |
| C76  | 2.274661408  | 8.155493179  | -4.918093142 |
| C77  | 0.848097904  | 6.157505364  | -4.635634508 |
| C78  | 0.083052831  | 6.312432431  | -3.302166330 |
| C79  | 1.068202747  | 4.684969975  | -5.035609808 |
| C80  | -0.176590921 | 3.800970653  | -5.186411175 |
| C81  | -1.091331041 | 4.090817191  | -6.390030799 |
| C82  | -2.489978429 | 6.149780965  | -6.590420155 |
| C83  | 0.137550018  | 6.396788723  | -0.865201477 |
| C84  | -0.104990901 | 7.866178308  | -0.464250688 |
| C85  | 0.875385942  | 5.702551082  | 0.284892014  |
| C86  | 0.895817957  | 10.093362670 | -0.332851143 |
| C87  | 0.206642265  | 11.282205546 | -0.995704744 |
| C88  | -1.202129117 | 12.097471704 | -2.841151083 |
| C89  | -2.609091383 | 12.526157478 | -2.374987003 |
| C90  | -1.204486537 | 11.760664123 | -4.349500601 |
| C91  | -2.077901657 | 10.548444838 | -4.653442380 |
| C92  | -4.592720296 | 11.933853779 | -1.054078287 |
| C93  | -4.694872083 | 13.165078858 | -0.161760846 |
| C94  | -5.127695344 | 10.687760772 | -0.297405373 |
| C95  | -5.174008520 | 9.449882310  | -1.164489754 |
| C96  | -6.276437706 | 9.204654897  | -2.000530998 |
| C97  | -4.109428841 | 8.531811654  | -1.182039024 |
| C98  | -6.311646260 | 8.087264501  | -2.838734583 |
| C99  | -4.120275624 | 7.420078979  | -2.028929669 |
| C100 | -5.222531454 | 7.213591839  | -2.857932245 |
| C101 | 5.556230159  | -5.329224945 | -7.378063361 |
| C102 | 4.071380900  | -5.100562229 | -7.148330230 |
| C103 | 2.371194643  | -3.456681121 | -6.393448919 |
| C104 | 1.911403947  | -2.273493399 | -7.251544288 |
| C105 | 2.178133660  | 0.127319797  | -7.659413166 |
| C106 | 3.286813512  | 1.167695461  | -7.795430372 |
| C107 | 5.485874015  | 1.997943149  | -7.126263519 |
| C108 | 6.532159367  | 1.780628619  | -8.203469681 |
| C109 | -1.185678042 | -5.354165651 | -8.569531098 |
| C110 | -2.282777974 | -4.282334073 | -8.640242690 |
| C111 | -0.903651704 | -5.715202568 | -7.093147885 |
| C112 | -0.098073045 | -7.023178921 | -6.980664421 |
| C113 | 0.408670034  | -7.220671965 | -5.569845404 |
| C114 | -2.842293121 | -1.899398598 | -8.492095050 |
| C115 | -2.308583458 | -0.737172770 | -9.307599256 |
| C116 | -3.381967792 | -1.520203873 | -7.091203196 |
| C117 | -2.279168748 | -1.397192773 | -6.073684696 |
| C118 | -1.502440086 | -0.230353102 | -5.981542293 |
| C119 | -1.932096036 | -2.501502455 | -5.278855259 |
| C120 | -0.381061786 | -0.193729740 | -5.148550628 |
| C121 | -0.808262265 | -2.464563039 | -4.447951015 |
| C122 | -0.017416708 | -1.314485339 | -4.398123689 |
| C123 | 8.749785942  | -6.482167265 | -2.097278196 |
| C124 | 9.759188519  | -6.312227155 | -0.950714318 |
| C125 | 7.360629419  | -6.906947106 | -1.596090173 |
| C126 | 6.275090206  | -6.931748872 | -2.628113723 |
| C127 | 6.182997029  | -7.758014346 | -3.730807969 |
| C128 | 4.334254484  | -6.550133224 | -3.552317035 |
| C129 | 10.767728934 | -7.165019504 | 1.090604510  |
| C130 | 12.173835554 | -6.931032518 | 0.578369922  |
| C131 | 0.796290102  | -6.851442841 | 1.365513368  |
| C132 | 2.192443970  | -6.444333654 | 1.737364321  |
| C133 | 3.271926667  | -6.859177431 | 0.653492498  |
| C134 | 3.242612125  | -8.401806720 | 0.454242462  |
| C135 | 4.397963875  | -8.896970471 | -0.431989466 |

|       |              |               |              |
|-------|--------------|---------------|--------------|
| C136  | 4.577566522  | -10.387011070 | -0.422858945 |
| C137  | 4.659475825  | -6.508020914  | 1.277994295  |
| C138  | 3.926002117  | -0.936717391  | -1.470455211 |
| Fe139 | 4.537569316  | -2.427162011  | -2.742772282 |
| Fe140 | 2.230944940  | 0.370015464   | -0.796863328 |
| Fe141 | 5.112223524  | 0.509692356   | -0.724775298 |
| Fe142 | 4.323570982  | 0.077031673   | -3.167602018 |
| Fe143 | 3.982916667  | 2.506749635   | -2.257669529 |
| Fe144 | 5.036317975  | -2.047897071  | -0.225251107 |
| Fe145 | 2.705884798  | -2.326287842  | -1.081075505 |
| H146  | -5.955333042 | -7.412981518  | 0.813588783  |
| H147  | -5.975364658 | -6.805940012  | -0.700068802 |
| H148  | -9.651339065 | -4.983971564  | 0.399743696  |
| H149  | -8.340674590 | -6.602679207  | -0.711532326 |
| H150  | -8.409849108 | -7.438702427  | 0.837967644  |
| H151  | -8.189412973 | -2.703215128  | 1.166359035  |
| H152  | -9.539554007 | -5.223770738  | 3.312364135  |
| H153  | -9.933002372 | -2.946800804  | 1.420772771  |
| H154  | -9.374786619 | -5.445716962  | 5.620783032  |
| H155  | -6.958643617 | -5.543400462  | 3.800425228  |
| H156  | -9.243312275 | -3.675971116  | 5.762215637  |
| H157  | -3.262939982 | -2.018001334  | 3.189538690  |
| H158  | -5.579962399 | -3.707678880  | 2.929803191  |
| H159  | -4.726651902 | -6.114024512  | 4.193129024  |
| H160  | -5.901551637 | 0.873737013   | 5.840937310  |
| H161  | -6.568037109 | -1.687933281  | 4.651201818  |
| H162  | -4.882408600 | -5.662236823  | 5.908868350  |
| H163  | -4.781536975 | -1.619738516  | 2.350609481  |
| H164  | -5.968649333 | -2.489091859  | 7.221283910  |
| H165  | -7.271518304 | -0.184261950  | 6.268369810  |
| H166  | -0.673993281 | -2.746150598  | 4.443110492  |
| H167  | -0.486689523 | -1.957170339  | 2.861167569  |
| H168  | 0.900016474  | -2.051513204  | 3.962968104  |
| H169  | -1.700373071 | -0.479778444  | 4.440242412  |
| H170  | -5.586993874 | -3.106527966  | 9.414354949  |
| H171  | -2.639359037 | 2.647747255   | 4.359066750  |
| H172  | -3.238909183 | 1.317287763   | 8.597886379  |
| H173  | -3.458082103 | 4.884030058   | 8.020673045  |
| H174  | -0.165009403 | 0.549505871   | 2.715124982  |
| H175  | 1.108494263  | 0.659542581   | 3.942962590  |
| H176  | 8.381863252  | 3.324657268   | 5.407496398  |
| H177  | -3.644335980 | 4.108912500   | 4.358498427  |
| H178  | -4.125364957 | 5.373133253   | 6.445122751  |
| H179  | -1.885006084 | 4.243955327   | 4.615081673  |
| H180  | -2.389446019 | 5.576883173   | 6.780594933  |
| H181  | -3.879383092 | 2.895350414   | 6.537625208  |
| H182  | -0.873158844 | 3.426109384   | 6.795549912  |
| H183  | -2.333318023 | 1.057557638   | 5.977947962  |
| H184  | -0.400619365 | 1.583037159   | 4.136020095  |
| H185  | 1.171086954  | 4.691629597   | -0.039534307 |
| H186  | 0.161214368  | 5.606571868   | 1.118811257  |
| H187  | 2.245381228  | 6.215189183   | 1.593112149  |
| H188  | 2.373393275  | 6.046516257   | 4.244527778  |
| H189  | 4.362840446  | 4.886936614   | 1.548390256  |
| H190  | 6.179071511  | 3.241322249   | 1.852488855  |
| H191  | 5.437727792  | 3.200167899   | 6.105992692  |
| H192  | -2.055482699 | -1.424200913  | 6.768685469  |
| H193  | -1.407738090 | -4.435954784  | 7.771564396  |
| H194  | -1.205801794 | -3.491099016  | 9.265244304  |
| H195  | -3.428610423 | -3.216896218  | 7.311420538  |
| H196  | -5.249418582 | -1.412477222  | 9.844781048  |
| H197  | 3.585054305  | 4.822472510   | 5.793663745  |

|      |               |              |               |
|------|---------------|--------------|---------------|
| H198 | 0.797511327   | -0.812491957 | 6.173549934   |
| H199 | -3.364524548  | 2.776591687  | 10.972509690  |
| H200 | -3.322634489  | 0.998642526  | 10.872187863  |
| H201 | -0.624094017  | 1.394607609  | 10.727998139  |
| H202 | 10.581694339  | -5.362955390 | 7.098124162   |
| H203 | -0.815742197  | -6.568065732 | -2.935364112  |
| H204 | 1.064015018   | -8.451289452 | 2.408071701   |
| H205 | -0.749080475  | -7.873205319 | -7.233648486  |
| H206 | 0.745280360   | -7.012588635 | -7.685915907  |
| H207 | -1.850589792  | -5.832062707 | -6.543791635  |
| H208 | -1.641571096  | -1.042626634 | -10.148899942 |
| H209 | -1.651720837  | -6.233477884 | -9.039397274  |
| H210 | -2.923199511  | -2.687972510 | -2.304588165  |
| H211 | -3.549825393  | -5.152618326 | -0.593532200  |
| H212 | -0.891834090  | -2.778118645 | -8.318354678  |
| H213 | -3.700643861  | -2.266179045 | -9.089074318  |
| H214 | 0.543346480   | -4.264745030 | -8.936185124  |
| H215 | -0.652669509  | -5.978888477 | -1.280998755  |
| H216 | -0.364429038  | -4.882862391 | -6.615589576  |
| H217 | 0.581543444   | -5.808885970 | -9.506565113  |
| H218 | -6.176044801  | -4.233185586 | -2.984950920  |
| H219 | -3.274828634  | -2.490618049 | -0.582749489  |
| H220 | 2.165758538   | -6.559644452 | -6.165075885  |
| H221 | -1.980905266  | -4.374133185 | -0.424028213  |
| H222 | -4.240200109  | 3.044310382  | 1.824009330   |
| H223 | -2.862478034  | 0.862394379  | 0.831664617   |
| H224 | -8.536340999  | 1.034443079  | 2.334361302   |
| H225 | -7.231263091  | -0.209473862 | -0.046752548  |
| H226 | -7.237044229  | 4.105022883  | 0.335754547   |
| H227 | -9.103062058  | 9.006833368  | 1.007781181   |
| H228 | -7.835216293  | 5.835558033  | 2.948172943   |
| H229 | -9.473804104  | 5.544277093  | 0.712354999   |
| H230 | -6.752831110  | 6.920189883  | 0.280937889   |
| H231 | -10.854463414 | 8.917257908  | -2.848384684  |
| H232 | -3.488109936  | 4.307389295  | -0.189637062  |
| H233 | -4.890055078  | 3.754846064  | -1.105057542  |
| H234 | -10.305805759 | 10.345547209 | -0.801476418  |
| H235 | -8.589715443  | 5.396907683  | -0.805172249  |
| H236 | -6.199040785  | 1.867203417  | -0.009792714  |
| H237 | -7.277848935  | -0.197738378 | 2.434712006   |
| H238 | -9.939137742  | 1.005907934  | -1.983031551  |
| H239 | -1.842150713  | 0.816393529  | -3.279409725  |
| H240 | -10.046794605 | -0.695206541 | -1.519418170  |
| H241 | 9.674420296   | 4.184798483  | 3.603830711   |
| H242 | 8.144728980   | 4.200533136  | 3.026984976   |
| H243 | 1.778158490   | 5.875645540  | -2.186040663  |
| H244 | -0.859791214  | 5.941109069  | -0.949335521  |
| H245 | 1.601581984   | 8.444262595  | -1.448352461  |
| H246 | -3.588202414  | 3.267160665  | -3.421976137  |
| H247 | -5.237043156  | 2.583349074  | -4.567972485  |
| H248 | -4.461193633  | 4.560654279  | -3.726857957  |
| H249 | -4.700693348  | 0.305374510  | -4.832394026  |
| H250 | -6.432848225  | 0.027391448  | -5.147047456  |
| H251 | -0.163131578  | 11.603027413 | -4.667144717  |
| H252 | -1.611951719  | 12.626274955 | -4.886062954  |
| H253 | -0.413159798  | 9.266863563  | -4.798353391  |
| H254 | -1.985229005  | 8.508762039  | -4.773272190  |
| H255 | -2.045676491  | 7.544789636  | -8.019676770  |
| H256 | -1.515123794  | 3.149876057  | -6.771558698  |
| H257 | -7.180390045  | 7.899739096  | -3.474512405  |
| H258 | -3.250383655  | 8.664728583  | -0.516871695  |
| H259 | -3.963583607  | 6.600780337  | -5.225215249  |

|      |              |               |              |
|------|--------------|---------------|--------------|
| H260 | 1.720884784  | 4.212747554   | -4.284305290 |
| H261 | 2.926590559  | 6.341060159   | -4.180133700 |
| H262 | -0.774705360 | 3.801128849   | -4.261953770 |
| H263 | -7.967908169 | -1.094491963  | -2.495557935 |
| H264 | 4.100497943  | 8.908932768   | -5.744823221 |
| H265 | -5.513087259 | -1.739369469  | -3.664373260 |
| H266 | 1.629151042  | 4.687553693   | -5.985106004 |
| H267 | -3.265078855 | 6.743735621   | -2.064489668 |
| H268 | 3.521864381  | 9.750370641   | -4.291525698 |
| H269 | -1.315660718 | 6.000695747   | -8.278285278 |
| H270 | -3.891175164 | 7.633491363   | -6.605322996 |
| H271 | -4.544540926 | -4.402735155  | -3.294789642 |
| H272 | -5.462423272 | -3.635920141  | -0.879977283 |
| H273 | -7.129444924 | 9.889416658   | -1.995161286 |
| H274 | -5.132472557 | 0.893626766   | -2.510226360 |
| H275 | 0.223213668  | 6.666361949   | -5.382221342 |
| H276 | -0.507349438 | 4.528645754   | -7.208970510 |
| H277 | 0.197520641  | 2.774733803   | -5.301113109 |
| H278 | -2.859357316 | 4.605932889   | -5.310311289 |
| H279 | 0.499226120  | 10.033747890  | 0.691809246  |
| H280 | -0.620706042 | 10.063386441  | -2.426738586 |
| H281 | -0.569803755 | 12.984179097  | -2.687069153 |
| H282 | 1.962818046  | 10.345789015  | -0.267102188 |
| H283 | -2.728827792 | 10.873697814  | -1.180599321 |
| H284 | 6.044629740  | -4.382459137  | -7.650870205 |
| H285 | 5.973113453  | -5.635441373  | -6.396405305 |
| H286 | 8.670021430  | -5.489778504  | -2.564838378 |
| H287 | 6.731122106  | -6.634338059  | -8.417024302 |
| H288 | 5.179091846  | -7.131976322  | -8.242827050 |
| H289 | 5.585022514  | 5.084177242   | -0.922303449 |
| H290 | 5.421801448  | 8.081791175   | -0.153514907 |
| H291 | 5.289267839  | 7.405157039   | -4.411866337 |
| H292 | 4.077367060  | 6.001830113   | -0.620230237 |
| H293 | 6.692211565  | 8.490908859   | -1.095011937 |
| H294 | 5.985894913  | 2.015876837   | -6.146082238 |
| H295 | 6.302352777  | 6.724574793   | -2.598252388 |
| H296 | 4.599916539  | -5.281092474  | 6.835565200  |
| H297 | 6.809725061  | -6.657809295  | 5.218128788  |
| H298 | 4.567068932  | 0.201758001   | -6.459003544 |
| H299 | 4.425896933  | 1.084534610   | 3.923172617  |
| H300 | 1.861169741  | -0.146244495  | -8.675063942 |
| H301 | -0.538212510 | -3.334421063  | -3.844478754 |
| H302 | 1.322775773  | 0.648785598   | -7.196165309 |
| H303 | 3.568131315  | -3.203734036  | 5.433020191  |
| H304 | 3.072217955  | -1.074777580  | -6.078992183 |
| H305 | 3.867100101  | -4.022651232  | 3.905942514  |
| H306 | 4.472136259  | -5.988221877  | 5.209454558  |
| H307 | 6.275407322  | -4.270158152  | 4.454571091  |
| H308 | 6.035767472  | -3.463051527  | 6.017589288  |
| H309 | -4.092330327 | -2.300625635  | -6.784484456 |
| H310 | 5.373351228  | -7.564832213  | 7.689812398  |
| H311 | 4.676067534  | -10.379994079 | 6.678494680  |
| H312 | 0.875625394  | -1.278076668  | -3.772355630 |
| H313 | 5.758095904  | -9.524711911  | 9.249801747  |
| H314 | 4.249204955  | -10.042574795 | 8.871833611  |
| H315 | 5.089052306  | -2.202148740  | 3.073546533  |
| H316 | 0.231307982  | 0.706111280   | -5.068935058 |
| H317 | -2.543121188 | -3.406479092  | -5.312745754 |
| H318 | 8.038455512  | -9.484649575  | 1.814626683  |
| H319 | 7.440180896  | -7.918235982  | -1.158097645 |
| H320 | 6.667327046  | -7.642046988  | 2.618878950  |
| H321 | 7.495585815  | -10.451385374 | 0.739855477  |

|       |              |               |              |
|-------|--------------|---------------|--------------|
| H322  | 6.329373922  | 0.931649945   | -8.902581269 |
| H323  | 6.538428825  | -4.649999283  | 1.619236306  |
| H324  | 2.490251026  | -6.867276631  | 2.708397810  |
| H325  | 4.464180170  | -3.206512601  | -6.464074146 |
| H326  | 3.313781734  | -8.882242169  | 1.443249900  |
| H327  | 4.555680233  | -7.960841507  | -5.112752109 |
| H328  | 3.335800719  | -6.182964010  | -3.758288292 |
| H329  | 6.277755706  | -10.755581868 | 7.327066133  |
| H330  | 5.103817820  | -0.010022319  | 2.712556424  |
| H331  | 8.373188077  | -5.049487580  | 3.142814655  |
| H332  | 7.239361457  | -3.262218001  | 1.602474528  |
| H333  | 8.668070740  | -5.532677695  | 5.481945235  |
| H334  | 3.777711822  | -1.412614135  | 6.331257079  |
| H335  | 3.677906391  | -12.013912259 | -0.774069571 |
| H336  | 4.219650624  | -8.570443703  | -1.467331240 |
| H337  | 5.350850362  | -8.466636097  | -0.104838856 |
| H338  | 2.283753925  | -8.686842368  | -0.003089377 |
| H339  | 2.339378828  | -3.199793629  | -5.322745184 |
| H340  | -1.774152706 | 0.639835066   | -6.583947721 |
| H341  | -3.937493037 | -0.577272013  | -7.203326461 |
| H342  | 2.226456486  | -5.347736489  | 1.789173966  |
| H343  | 8.476187482  | -6.577676743  | 3.391088985  |
| H344  | 7.274831638  | -8.454680186  | 3.800901595  |
| H345  | 3.670288927  | 0.256078742   | 5.961860357  |
| H346  | 6.873382799  | -8.485931399  | -4.139168290 |
| H347  | 7.049944820  | -6.236944922  | -0.784694289 |
| H348  | 1.699344988  | -4.295544403  | -6.584354444 |
| H349  | 5.035177969  | 2.989817373   | -7.292118101 |
| H350  | 6.867555798  | 1.438608275   | 5.014849032  |
| H351  | 7.171880181  | 1.494372341   | 3.267376251  |
| H352  | 10.164441807 | -7.061232633  | -3.468094594 |
| H353  | 9.473093692  | -8.319768517  | -2.683761556 |
| H354  | 10.774720566 | -8.123333827  | 1.635316472  |
| H355  | 9.138929898  | -8.049440563  | 0.039151448  |
| H356  | 12.377990702 | -7.356367000  | -0.434914734 |
| H357  | 10.495201609 | -6.372901575  | 1.805940394  |
| H358  | 9.914476905  | 1.242922635   | 3.738783424  |
| H359  | -3.739159434 | 13.485684896  | 0.314370273  |
| H360  | 9.385783017  | -4.901020551  | 8.338045508  |
| H361  | 8.959561483  | -2.794505473  | 6.619833524  |
| H362  | -5.226693903 | 12.113973118  | -1.936808039 |
| H363  | -4.497972775 | 10.507931237  | 0.587724166  |
| H364  | -6.136474701 | 10.934799445  | 0.062788629  |
| H365  | -6.083294389 | 6.012286158   | -4.124467197 |
| H366  | 0.328852884  | -1.518766465  | 0.308412591  |
| H367  | -1.534735939 | -0.319399970  | -1.047513435 |
| Mo368 | 4.238004057  | -4.507957654  | -0.995050311 |
| N369  | 2.335835972  | -0.382446422  | 2.059239066  |
| N370  | 2.304513621  | -0.093298008  | 0.975604911  |
| N371  | -6.511805343 | -7.380356535  | -0.045063385 |
| N372  | -8.884857957 | -4.694091212  | 1.001920220  |
| N373  | -9.094536431 | -4.457434619  | 3.811097506  |
| N374  | -6.577753248 | -5.317499494  | 4.719149030  |
| N375  | -4.893961524 | -3.301835321  | 3.568036222  |
| N376  | -5.852219146 | -1.061177378  | 5.025501143  |
| N377  | -5.487748146 | -1.796610056  | 7.801737597  |
| N378  | -2.902624362 | -3.013769491  | 8.167744752  |
| N379  | -1.040650425 | -1.495233921  | 6.794383279  |
| N380  | -1.595037413 | 1.485530321   | 6.539259355  |
| N381  | -2.637827137 | 1.930253844   | 9.153366289  |
| N382  | 5.023695797  | -9.465317818  | 8.541568732  |
| N383  | 5.871475998  | -7.613468317  | 6.794081640  |

|      |               |              |              |
|------|---------------|--------------|--------------|
| N384 | 4.698741201   | -2.130688059 | 4.018481555  |
| N385 | 3.752981636   | -0.694561216 | 5.615060147  |
| N386 | 4.715742898   | 0.145352964  | 3.669694666  |
| N387 | 8.548843437   | -5.394862862 | 6.509230611  |
| N388 | -5.286417885  | -3.732007681 | -3.029384084 |
| N389 | -1.175030492  | -6.002754205 | -2.159690465 |
| N390 | -5.660146844  | -1.099336891 | -2.871514863 |
| N391 | -8.186377381  | -0.126373894 | -2.269773291 |
| N392 | -7.952321526  | 0.281041303  | 0.500701117  |
| N393 | -5.943832535  | 2.237720437  | 0.907179388  |
| N394 | -3.039463430  | 2.243443242  | -2.181161598 |
| N395 | -2.165175559  | 0.482047055  | -1.176433777 |
| N396 | -6.772229519  | 4.875324993  | 0.810052906  |
| N397 | -9.904549733  | 7.322544287  | -1.749759523 |
| N398 | -10.082440403 | 9.357394725  | -0.884667476 |
| N399 | 8.903514701   | 3.577090014  | 3.316009499  |
| N400 | 6.158593533   | 7.688337981  | -0.748452334 |
| N401 | 4.600910343   | 7.989604132  | -3.944661908 |
| N402 | 2.137293520   | 6.846802292  | -4.617297762 |
| N403 | -2.220546250  | 4.964576415  | -6.055385604 |
| N404 | -1.811549295  | 6.627656715  | -7.654772674 |
| N405 | -3.416520883  | 6.954174337  | -6.015785807 |
| N406 | 0.810695907   | 6.240134608  | -2.152512311 |
| N407 | 0.763448675   | 8.791316931  | -0.971051585 |
| N408 | -0.611136738  | 11.015865373 | -2.056996197 |
| N409 | -1.427311070  | 9.354809409  | -4.658234233 |
| N410 | -3.219099142  | 11.714067139 | -1.478360679 |
| N411 | 5.760273773   | -6.313403216 | -8.447975958 |
| N412 | 3.726515477   | -3.865684969 | -6.739776296 |
| N413 | 2.484706004   | -1.094393409 | -6.936378829 |
| N414 | 4.447245600   | 0.984612375  | -7.115072757 |
| N415 | -0.022750022  | -4.992531571 | -9.390311532 |
| N416 | -1.878469957  | -2.989214936 | -8.502547540 |
| N417 | 9.268642205   | -7.414132658 | -3.118638490 |
| N418 | 5.108403542   | -6.175403949 | -2.538446158 |
| N419 | 4.952210261   | -7.501863462 | -4.297515353 |
| N420 | 9.811219781   | -7.284131899 | 0.002366407  |
| N421 | 0.121374877   | 2.431840339  | -0.429078088 |
| N422 | 0.907704935   | 1.640623250  | -0.572001694 |
| O423 | -6.727768939  | -5.064228419 | 1.631267153  |
| O424 | -8.161704889  | -2.384075694 | 3.666740862  |
| O425 | -6.944168705  | -4.195594303 | 6.678754403  |
| O426 | -3.541235501  | -3.600126039 | 5.371625646  |
| O427 | -3.810054342  | -0.100766966 | 4.736798696  |
| O428 | -5.005713765  | 0.410244963  | 8.150213775  |
| O429 | -2.980224985  | -2.360380419 | 10.364485342 |
| O430 | 0.707735966   | -2.766135395 | 7.577296451  |
| O431 | 0.562493703   | 1.386603438  | 7.271833543  |
| O432 | -1.248753669  | 3.723110730  | 9.245790095  |
| O433 | -1.279807771  | 2.276683206  | 12.448361031 |
| O434 | 6.741417130   | -9.182467489 | 5.331593287  |
| O435 | 7.129102087   | -5.564523201 | 8.309752202  |
| O436 | 10.930486270  | -2.779963829 | 7.140542195  |
| O437 | -5.599045995  | -1.080113798 | -0.576768833 |
| O438 | -2.962311174  | -5.353248269 | -3.408571654 |
| O439 | -7.344771009  | 1.990546409  | -2.094863174 |
| O440 | -5.959532340  | 1.989025041  | -4.912298247 |
| O441 | -10.075384689 | 1.157179192  | 0.567806551  |
| O442 | -6.299525642  | 2.184203972  | 3.162904869  |
| O443 | -4.900060265  | 5.529231680  | 1.941509446  |
| O444 | -7.587577367  | 7.827972369  | 2.588610902  |
| O445 | 9.715200477   | 1.158991015  | 5.770065697  |

|  |                        |              |               |              |
|--|------------------------|--------------|---------------|--------------|
|  | O446                   | 2.847222377  | 5.859752183   | 3.413535122  |
|  | O447                   | 3.630597677  | 8.554251306   | -1.961629221 |
|  | O448                   | 1.354734984  | 8.880742897   | -5.352095177 |
|  | O449                   | -1.142867427 | 6.513069760   | -3.314555035 |
|  | O450                   | -1.021216614 | 8.156398462   | 0.317960608  |
|  | O451                   | 2.015297720  | 6.475309331   | 0.677557437  |
|  | O452                   | 0.382448245  | 12.423632994  | -0.549334891 |
|  | O453                   | -3.127708911 | 13.565718523  | -2.807059187 |
|  | O454                   | -3.307384389 | 10.649633867  | -4.785823989 |
|  | O455                   | -5.745265983 | 13.748942685  | 0.050323146  |
|  | O456                   | -5.194533844 | 6.116931407   | -3.731707371 |
|  | O457                   | 3.254029534  | -6.042926918  | -7.310700742 |
|  | O458                   | 1.085903521  | -2.415672940  | -8.180677613 |
|  | O459                   | 3.071405256  | 2.164996308   | -8.504705035 |
|  | O460                   | 7.531342437  | 2.474403905   | -8.313050144 |
|  | O461                   | -3.476925254 | -4.593450084  | -8.789963841 |
|  | O462                   | -0.297535189 | -7.621167605  | -4.648469768 |
|  | O463                   | 1.694126190  | -6.893275061  | -5.338483617 |
|  | O464                   | -2.602956336 | 0.435321127   | -9.127017745 |
|  | O465                   | 10.567905413 | -5.365303325  | -0.933844314 |
|  | O466                   | 13.055576217 | -6.397951551  | 1.237754959  |
|  | O467                   | 0.032158800  | -6.212857278  | 0.656279742  |
|  | O468                   | 0.359559120  | -8.056751432  | 1.858819002  |
|  | O469                   | 5.606357277  | -10.982781726 | -0.110050576 |
|  | O470                   | 3.461260016  | -11.057846451 | -0.812804473 |
|  | O471                   | 5.348841169  | -5.629068238  | 0.632895390  |
|  | O472                   | 5.050711262  | -7.100191868  | 2.313081485  |
|  | O473                   | 3.059132325  | -6.187153879  | -0.531362588 |
|  | O474                   | 8.868520229  | -5.713118747  | 3.681787507  |
|  | O475                   | 7.148677718  | -4.070855380  | 2.146787022  |
|  | O476                   | -4.037768547 | 3.796391605   | -4.172036263 |
|  | O477                   | 8.331388366  | -10.184741788 | 1.175866300  |
|  | O478                   | 7.523947333  | -8.058347370  | 2.926052150  |
|  | S479                   | 3.964298485  | 4.796872839   | -2.724683371 |
|  | S480                   | 2.358336762  | 1.168955648   | -3.118622245 |
|  | S481                   | 2.750886312  | -3.780982887  | -2.720967182 |
|  | S482                   | 3.718736579  | 2.159667755   | 0.011503029  |
|  | S483                   | 0.660102161  | -1.440256561  | -1.016729285 |
|  | S484                   | 4.885158490  | -1.453821230  | -4.722225858 |
|  | S485                   | 3.408630489  | -3.189722858  | 0.835876494  |
|  | S486                   | 5.982054413  | 1.475335409   | -2.661784570 |
|  | S487                   | 6.244100359  | -3.346599349  | -1.584818869 |
|  | S488                   | 6.243809232  | -0.582925755  | 0.903160008  |
|  | <b>2, 47(2)</b>        |              |               |              |
|  | Fe1                    | 3.20         |               |              |
|  | Fe2                    | 0.05         |               |              |
|  | Fe3                    | 2.92         |               |              |
|  | Fe4                    | -2.67        |               |              |
|  | Fe5                    | 2.30         |               |              |
|  | Fe6                    | -0.18        |               |              |
|  | Fe7                    | -2.18        |               |              |
|  | bm22b2n2x2n2ndtc.car_4 |              |               |              |
|  | C1                     | -7.531865992 | 2.673517342   | 5.132058060  |
|  | C2                     | -7.563076009 | 2.327102073   | 6.623150017  |
|  | C3                     | -8.792541878 | 2.731771322   | 3.024195470  |
|  | C4                     | -8.505755706 | 4.166247438   | 2.583039816  |
|  | C5                     | -8.576702679 | 6.544058672   | 3.129996990  |
|  | C6                     | -7.083088247 | 6.886792103   | 3.097990249  |
|  | C7                     | -4.846468769 | 6.329994771   | 3.925231268  |
|  | C8                     | -4.204105247 | 5.689580154   | 2.690139602  |
|  | C9                     | -4.195037814 | 3.829157676   | 1.111890092  |
|  | C10                    | -4.500998377 | 4.611042544   | -0.174612824 |
|  | C11                    | -6.017844219 | 6.066691242   | -1.387380390 |
|  | C12                    | -5.286926507 | 7.416330927   | -1.452502379 |
|  | C13                    | -4.766736770 | 9.510831297   | -0.294620707 |
|  | C14                    | -3.261451840 | 9.708794096   | -0.076280624 |
|  | C15                    | -1.228487568 | 8.904102292   | 1.056790793  |
|  | C16                    | -0.254466731 | 7.931349794   | 0.382505058  |

|     |               |              |              |
|-----|---------------|--------------|--------------|
| C17 | -0.091749258  | 5.968471114  | -1.142200717 |
| C18 | -0.239241583  | 6.186591679  | -2.659298635 |
| C19 | -0.493572550  | 4.548453873  | -0.678838135 |
| C20 | 0.073571298   | 3.486320737  | -1.626502588 |
| C21 | -0.076356017  | 4.326360140  | 0.779317317  |
| C22 | -1.688120501  | 6.024161579  | -4.635487872 |
| C23 | -1.743927288  | 7.491174272  | -5.096164244 |
| C24 | -2.928573775  | 5.202767570  | -5.058589194 |
| C25 | -3.231209877  | 5.388139364  | -6.549029155 |
| C26 | -2.724660024  | 3.715135545  | -4.739657226 |
| C27 | -2.605202977  | 9.728206459  | -4.732501766 |
| C28 | -1.248114518  | 10.381700919 | -4.910273947 |
| C29 | 5.993345552   | 9.583780181  | 7.412089054  |
| C30 | 6.537538138   | 8.415500343  | 6.589004273  |
| C31 | 6.663055296   | 7.529670613  | 4.254395440  |
| C32 | 7.701401082   | 8.220134957  | 3.348434876  |
| C33 | 5.442112670   | 7.040442497  | 3.454997818  |
| C34 | 5.801776231   | 6.060934086  | 2.335686984  |
| C35 | 4.565182130   | 5.329545750  | 1.810192224  |
| C36 | 4.532041413   | 4.387299443  | -0.509776647 |
| C37 | 9.939074763   | 8.062829003  | 2.363373690  |
| C38 | 10.112074163  | 7.380876365  | 1.022274438  |
| C39 | -4.875102846  | -0.622590442 | 3.631949902  |
| C40 | -5.408954279  | -0.999049172 | 2.240270964  |
| C41 | -3.348702881  | -0.411183197 | 3.511960176  |
| C42 | -2.667610886  | 0.266191025  | 4.718883867  |
| C43 | -2.166967378  | -0.693022616 | 5.796970971  |
| C44 | -6.067231419  | -2.900736145 | 0.833937797  |
| C45 | -7.456734685  | -2.564182239 | 0.281043714  |
| C46 | -5.837346096  | -4.425834104 | 0.831573578  |
| C47 | -9.453326326  | -1.166761377 | 0.499474548  |
| C48 | -9.182023143  | 0.079564929  | -0.356602743 |
| C49 | -7.579900394  | 1.829083566  | -0.998850440 |
| C50 | -6.553726855  | 1.664798686  | -2.119099863 |
| C51 | -4.974765510  | 0.203559776  | -3.302915363 |
| C52 | -5.615823658  | 0.130752242  | -4.713606961 |
| C53 | -4.239209959  | -1.132339751 | -3.114452990 |
| C54 | -3.433442956  | -1.316156678 | -1.866909800 |
| C55 | -2.824838214  | -0.460100006 | -0.980541724 |
| C56 | -2.289592149  | -2.533518125 | -0.385069256 |
| C57 | -7.558340908  | -0.735809666 | -5.972363493 |
| C58 | -7.778325864  | 0.518539191  | -6.816378235 |
| C59 | -8.912366949  | -1.379967603 | -5.593680905 |
| C60 | -9.552518492  | -2.245630532 | -6.639584174 |
| C61 | -9.670362409  | -2.080390506 | -8.007125242 |
| C62 | -10.640432634 | -3.968477885 | -7.369870739 |
| C63 | 8.424919844   | 3.336047807  | -4.092883551 |
| C64 | 9.439249355   | 3.861517937  | -3.094066807 |
| C65 | 7.071282985   | 3.257912998  | -3.352769598 |
| C66 | 5.924925726   | 2.837815430  | -4.242771695 |
| C67 | 5.185299516   | 3.781765411  | -4.979557243 |
| C68 | 5.548480903   | 1.486464602  | -4.339651907 |
| C69 | 4.101706230   | 3.396575819  | -5.776836309 |
| C70 | 4.477297563   | 1.085572633  | -5.137733197 |
| C71 | 3.751744759   | 2.042156115  | -5.852105779 |
| C72 | 5.262714210   | -3.891545376 | -6.360744416 |
| C73 | 4.191559923   | -4.795853073 | -6.985007395 |
| C74 | 4.633751879   | -3.010812858 | -5.271728125 |
| C75 | 3.315270398   | -7.082332166 | -7.182567261 |
| C76 | 1.936806547   | -7.031613996 | -6.520160193 |
| C77 | 0.578211353   | -6.171968928 | -4.648540172 |
| C78 | -0.174006240  | -4.907543129 | -5.116642940 |



|       |              |              |               |
|-------|--------------|--------------|---------------|
| C79   | 0.834826227  | -6.183494247 | -3.129180566  |
| C80   | -0.384307672 | -6.064218111 | -2.208394148  |
| C81   | -1.324138711 | -7.282321124 | -2.137707522  |
| C82   | -2.794214314 | -8.018691185 | -4.024421537  |
| C83   | -0.072186729 | -2.595520744 | -5.894666641  |
| C84   | -0.356376779 | -2.598814540 | -7.408994906  |
| C85   | 0.713892987  | -1.319446673 | -5.561837967  |
| C86   | 0.564898633  | -3.108215721 | -9.615547358  |
| C87   | -0.159225236 | -4.060862555 | -10.563876151 |
| C88   | -1.612957108 | -6.034012148 | -10.804780838 |
| C89   | -3.017004254 | -5.653907385 | -11.318073137 |
| C90   | -1.656694968 | -7.389196024 | -10.060779233 |
| C91   | -2.489620403 | -7.307484730 | -8.787339709  |
| C92   | -4.944473185 | -4.155629724 | -11.072766987 |
| C93   | -5.075403788 | -3.653739822 | -12.507347100 |
| C94   | -5.423673497 | -3.063166852 | -10.081830909 |
| C95   | -5.472771638 | -3.558214138 | -8.654932653  |
| C96   | -6.581276505 | -4.286359754 | -8.194912025  |
| C97   | -4.401217141 | -3.349398239 | -7.770900898  |
| C98   | -6.617996240 | -4.807228931 | -6.898806345  |
| C99   | -4.410399277 | -3.880687765 | -6.475983481  |
| C100  | -5.520192330 | -4.611280684 | -6.058595836  |
| C101  | 5.588863333  | -5.761179570 | 7.031847813   |
| C102  | 4.103709802  | -5.560797170 | 6.785813698   |
| C103  | 2.363204242  | -5.248661922 | 5.047711923   |
| C104  | 1.840797541  | -6.373395893 | 4.147160776   |
| C105  | 2.023242596  | -7.430992922 | 1.947315045   |
| C106  | 3.085502295  | -7.883207469 | 0.948109048   |
| C107  | 5.277448789  | -7.540525807 | -0.088126745  |
| C108  | 6.320944109  | -8.519726023 | 0.415094079   |
| C109  | -1.183691595 | -6.700029930 | 7.552697837   |
| C110  | -2.313978236 | -7.027880101 | 6.569915559   |
| C111  | -0.849164728 | -5.192076232 | 7.474118018   |
| C112  | -0.002910244 | -4.743281392 | 8.678849873   |
| C113  | 0.538631734  | -3.347190754 | 8.463309557   |
| C114  | -2.944664660 | -7.531038298 | 4.258426129   |
| C115  | -2.472827262 | -8.649079149 | 3.349741795   |
| C116  | -3.471562676 | -6.272330704 | 3.526497557   |
| C117  | -2.354929159 | -5.369301680 | 3.072943022   |
| C118  | -1.643406637 | -5.629819642 | 1.888758627   |
| C119  | -1.928655880 | -4.310322287 | 3.893622231   |
| C120  | -0.506438615 | -4.881069108 | 1.568286447   |
| C121  | -0.790596262 | -3.564258102 | 3.572993712   |
| C122  | -0.059917248 | -3.867519518 | 2.421587763   |
| C123  | 8.924268004  | -0.457145763 | 6.589210257   |
| C124  | 9.948783510  | 0.572809007  | 6.086522226   |
| C125  | 7.556622682  | 0.175445854  | 6.895114346   |
| C126  | 6.456597631  | -0.782631758 | 7.234044544   |
| C127  | 6.371466399  | -1.602469418 | 8.342291703   |
| C128  | 4.488330565  | -1.725997681 | 7.182511467   |
| C129  | 11.021040754 | 2.744333947  | 6.318941899   |
| C130  | 12.408755902 | 2.155620149  | 6.192245002   |
| C131  | 1.064193994  | 3.204066059  | 6.211687926   |
| C132  | 2.449981041  | 3.377291851  | 5.661667534   |
| C133  | 3.518775835  | 2.423771180  | 6.336447899   |
| C134  | 3.538370022  | 2.668524796  | 7.871259077   |
| C135  | 4.689384122  | 1.928266995  | 8.573404236   |
| C136  | 4.910496812  | 2.369439894  | 9.992134619   |
| C137  | 4.905141201  | 2.881651963  | 5.781706078   |
| C138  | 3.938552062  | -1.252807653 | 1.217842705   |
| Fe139 | 4.554930539  | -2.099879896 | 2.981917946   |
| Fe140 | 2.211633211  | -0.899490345 | -0.201915646  |

|       |              |              |              |
|-------|--------------|--------------|--------------|
| Fe141 | 5.097117737  | -0.940997604 | -0.393269404 |
| Fe142 | 4.267005865  | -3.165035183 | 0.676037738  |
| Fe143 | 3.881205985  | -2.905842390 | -1.904679609 |
| Fe144 | 5.089139729  | 0.210770640  | 1.931001620  |
| Fe145 | 2.745757814  | -0.481875144 | 2.478636867  |
| H146  | -5.682849205 | 2.983997056  | 7.059232000  |
| H147  | -5.779477718 | 1.362523669  | 6.886937229  |
| H148  | -9.486409425 | 2.063514700  | 4.932695990  |
| H149  | -8.159684882 | 1.413833367  | 6.773444858  |
| H150  | -8.121632459 | 3.139010836  | 7.120980885  |
| H151  | -8.074349164 | 2.096356793  | 2.485816021  |
| H152  | -9.296430957 | 4.906654664  | 4.327306384  |
| H153  | -9.806439628 | 2.463260577  | 2.697909200  |
| H154  | -9.067348380 | 7.175064784  | 3.883150816  |
| H155  | -6.690460212 | 5.401546502  | 4.459502192  |
| H156  | -8.985193135 | 6.803530731  | 2.144517716  |
| H157  | -3.104285215 | 3.709910974  | 1.153745172  |
| H158  | -5.377239945 | 4.000161646  | 2.905034161  |
| H159  | -4.432383879 | 5.867660000  | 4.831678743  |
| H160  | -5.757949710 | 5.513041762  | -2.297777968 |
| H161  | -6.377130897 | 5.137865104  | 0.522939617  |
| H162  | -4.567630120 | 7.390359497  | 3.918940968  |
| H163  | -4.646037954 | 2.828143657  | 1.051310139  |
| H164  | -5.749317726 | 7.803720632  | 0.529574332  |
| H165  | -7.101171901 | 6.252851219  | -1.383895246 |
| H166  | -0.534093338 | 5.079752939  | 1.438131587  |
| H167  | -0.404741928 | 3.334238106  | 1.126882362  |
| H168  | 1.016071603  | 4.374737515  | 0.899887333  |
| H169  | -1.591676512 | 4.485554944  | -0.724201178 |
| H170  | -5.285297558 | 10.057758999 | 0.506192852  |
| H171  | -2.619932597 | 3.526231679  | -3.662644395 |
| H172  | -3.078921290 | 7.993486400  | -3.579555374 |
| H173  | -3.436279026 | 6.436263962  | -6.809306856 |
| H174  | -0.149716305 | 2.479157127  | -1.246494639 |
| H175  | 1.165077847  | 3.567999117  | -1.717105681 |
| H176  | 8.328808909  | 4.095920896  | -4.891968359 |
| H177  | -3.585296954 | 3.129569878  | -5.094259434 |
| H178  | -4.108852809 | 4.787423331  | -6.828515059 |
| H179  | -1.823465499 | 3.334116608  | -5.246378120 |
| H180  | -2.381009147 | 5.049938217  | -7.162468551 |
| H181  | -3.792147598 | 5.573641910  | -4.477378491 |
| H182  | -0.802837008 | 5.609495745  | -5.141488919 |
| H183  | -2.207269035 | 5.534983944  | -2.605971831 |
| H184  | -0.358777908 | 3.566416115  | -2.633652676 |
| H185  | 1.027601571  | -1.357388579 | -4.505844715 |
| H186  | 0.018942169  | -0.473637202 | -5.691933390 |
| H187  | 2.083746841  | -0.243980642 | -6.461292917 |
| H188  | 2.223721827  | 2.348404259  | -7.013217808 |
| H189  | 4.175765165  | 0.038448310  | -5.167517342 |
| H190  | 6.067378867  | 0.736018994  | -3.739037945 |
| H191  | 5.447438683  | 4.841870450  | -4.919307084 |
| H192  | -1.843694841 | 7.016710669  | -0.493700818 |
| H193  | -1.122281315 | 8.766674634  | 2.142823999  |
| H194  | -0.900256837 | 9.922278891  | 0.810655314  |
| H195  | -3.162162957 | 8.022123243  | 1.131741917  |
| H196  | -5.006433911 | 9.994232567  | -1.250604932 |
| H197  | 3.519605342  | 4.145847574  | -6.321068374 |
| H198  | 0.970688325  | 6.140837156  | -0.921660237 |
| H199  | -3.189763710 | 9.865951201  | -5.656931824 |
| H200  | -3.119770879 | 10.265647714 | -3.920358131 |
| H201  | -0.425393528 | 9.927079264  | -4.310129501 |
| H202  | 10.889127455 | 8.026991313  | 2.917613656  |

|      |               |              |               |
|------|---------------|--------------|---------------|
| H203 | -0.647773526  | -0.958047794 | 7.144178855   |
| H204 | 1.435267521   | 4.664890981  | 7.414670565   |
| H205 | -0.634961442  | -4.730127911 | 9.578806008   |
| H206 | 0.823392876   | -5.448984596 | 8.847280565   |
| H207 | -1.775180093  | -4.597586177 | 7.448103146   |
| H208 | -1.820501833  | -9.400605249 | 3.853249367   |
| H209 | -1.633931372  | -6.887563437 | 8.539291782   |
| H210 | -2.875558984  | -1.386927523 | 3.315814173   |
| H211 | -3.365764020  | 0.969450749  | 5.204865259   |
| H212 | -0.962767563  | -7.177479457 | 5.001210122   |
| H213 | -3.803251467  | -7.974996090 | 4.802538120   |
| H214 | 0.505433552   | -7.411378762 | 6.576218941   |
| H215 | -0.482759725  | 0.479463714  | 6.135984264   |
| H216 | -0.322768634  | -4.995438695 | 6.527492578   |
| H217 | 0.561151564   | -7.552212515 | 8.217543172   |
| H218 | -6.045986997  | -1.408494159 | 5.143745002   |
| H219 | -3.178682626  | 0.220319388  | 2.628386473   |
| H220 | 2.267832867   | -4.147985461 | 7.969972209   |
| H221 | -1.826679554  | 0.877344476  | 4.361316790   |
| H222 | -4.266594248  | 1.043790817  | -3.332512446  |
| H223 | -2.815777583  | 0.622400044  | -0.930166207  |
| H224 | -8.495755918  | 2.217861911  | -1.463878782  |
| H225 | -7.244510924  | 0.243966153  | 0.394209994   |
| H226 | -7.348586830  | -0.533615114 | -3.847944355  |
| H227 | -9.321424152  | -1.308585274 | -8.684034537  |
| H228 | -7.969950838  | 1.439295019  | -6.211470235  |
| H229 | -9.606127851  | -0.589445626 | -5.256626624  |
| H230 | -6.945614594  | -1.445451807 | -6.550250104  |
| H231 | -11.185683127 | -4.905150176 | -7.446582059  |
| H232 | -3.566766255  | -1.247199303 | -3.980773209  |
| H233 | -4.972368192  | -1.952923529 | -3.184905438  |
| H234 | -10.614255050 | -3.382369987 | -9.417230674  |
| H235 | -8.736155804  | -2.029085767 | -4.722218652  |
| H236 | -6.118241738  | -0.268159206 | -1.536517953  |
| H237 | -7.215499246  | 2.608842624  | -0.313737365  |
| H238 | -9.997586838  | -1.880393291 | -0.131819595  |
| H239 | -1.845784357  | -3.367644345 | 0.151871406   |
| H240 | -10.112749863 | -0.873678004 | 1.327850500   |
| H241 | 9.598733444   | 2.118591684  | -5.248615738  |
| H242 | 8.069472778   | 1.571981767  | -5.063884945  |
| H243 | 1.566650905   | -3.777661919 | -5.106187394  |
| H244 | -1.054169344  | -2.524187938 | -5.404388939  |
| H245 | 1.301415067   | -3.761999819 | -7.747385940  |
| H246 | -3.420125866  | -3.487415557 | -1.922449146  |
| H247 | -4.830829047  | -5.049034683 | -1.773856554  |
| H248 | -4.692655233  | -4.823311861 | -3.342643774  |
| H249 | -4.806911317  | -4.637219668 | 1.148700824   |
| H250 | -6.529293275  | -4.911176838 | 1.540156609   |
| H251 | -0.622758574  | -7.700027171 | -9.849681475  |
| H252 | -2.118565459  | -8.125110239 | -10.731825269 |
| H253 | -0.777224645  | -7.185901068 | -7.561051213  |
| H254 | -2.316989943  | -6.897953267 | -6.794070611  |
| H255 | -2.397281708  | -9.785849237 | -4.979917101  |
| H256 | -1.719349316  | -7.390367301 | -1.116791868  |
| H257 | -7.492176887  | -5.363179297 | -6.549669114  |
| H258 | -3.534571025  | -2.756803394 | -8.078544439  |
| H259 | -4.261437052  | -6.798968862 | -4.815602235  |
| H260 | 1.521315869   | -5.357512296 | -2.884750408  |
| H261 | 2.658684025   | -5.830736590 | -5.001759122  |
| H262 | -0.969190984  | -5.162853609 | -2.449381411  |
| H263 | -7.944544350  | -1.557429603 | 1.978163959   |
| H264 | 3.717762830   | -8.094998492 | -7.045784464  |

|      |              |              |               |
|------|--------------|--------------|---------------|
| H265 | -5.658529115 | -2.833443822 | 3.001081213   |
| H266 | 1.371552507  | -7.117814465 | -2.896131304  |
| H267 | -3.543527791 | -3.761023454 | -5.823044409  |
| H268 | -6.775914054 | -4.470781161 | -0.876867525  |
| H269 | 3.144654291  | -6.929751683 | -8.256893506  |
| H270 | -1.618283746 | -9.606772874 | -3.448149183  |
| H271 | -4.213904647 | -8.410407812 | -5.444981194  |
| H272 | -4.423148364 | -1.789771056 | 5.267229223   |
| H273 | -5.331525407 | 0.358047276  | 3.864628177   |
| H274 | -7.436515916 | -4.449232193 | -8.854741303  |
| H275 | -5.382068278 | -2.459033222 | 0.090578997   |
| H276 | -0.070930870 | -7.011187805 | -4.933868815  |
| H277 | -0.761533404 | -8.199528885 | -2.350722484  |
| H278 | 0.016929243  | -5.905963264 | -1.198276761  |
| H279 | -3.092466593 | -6.360475314 | -2.892146491  |
| H280 | 0.172993220  | -2.101485662 | -9.826529814  |
| H281 | -0.950639740 | -5.098689570 | -8.978882581  |
| H282 | -1.002498966 | -6.163685868 | -11.710372173 |
| H283 | 1.625311568  | -3.123058271 | -9.903223510  |
| H284 | -3.046729468 | -4.033356269 | -10.074595112 |
| H285 | 6.045124904  | -6.282381270 | 6.177935544   |
| H286 | 6.030413462  | -4.743124136 | 7.056706239   |
| H287 | 8.803041026  | -1.171795162 | 5.762050384   |
| H288 | 6.777688388  | -6.450346315 | 8.540188607   |
| H289 | 5.241653946  | -6.118115687 | 9.004927116   |
| H290 | 5.426263449  | -2.416626076 | -4.799393715  |
| H291 | 5.172361445  | -2.537334737 | -7.882478005  |
| H292 | 5.007853455  | -6.433443931 | -6.049154066  |
| H293 | 3.897762337  | -2.336543752 | -5.732125585  |
| H294 | 6.397325657  | -3.608104809 | -8.046886968  |
| H295 | 5.778476053  | -6.615000788 | -0.412419367  |
| H296 | 6.041639109  | -4.519105407 | -5.899069632  |
| H297 | 4.910100656  | 7.914399498  | 3.044159495   |
| H298 | 7.124344456  | 6.675575044  | 4.764116928   |
| H299 | 4.432598259  | -6.380231668 | 1.476487512   |
| H300 | 4.517504597  | 3.325893695  | -2.266674235  |
| H301 | 1.690418732  | -8.321468629 | 2.496788294   |
| H302 | -0.458476915 | -2.756646848 | 4.228837320   |
| H303 | 1.161103339  | -7.098054005 | 1.345404694   |
| H304 | 3.816726629  | 6.032369190  | 1.419345318   |
| H305 | 3.011376479  | -5.620984189 | 2.654456108   |
| H306 | 4.076443444  | 4.781131158  | 2.630531207   |
| H307 | 4.767342636  | 6.552779097  | 4.177484117   |
| H308 | 6.506065136  | 5.300626161  | 2.704999330   |
| H309 | 6.296816024  | 6.588867763  | 1.504539182   |
| H310 | -4.128595543 | -5.736615048 | 4.226347223   |
| H311 | 5.745543366  | 9.330040416  | 4.997947970   |
| H312 | 5.168127924  | 9.175330217  | 8.015668753   |
| H313 | 0.849995350  | -3.320413710 | 2.174907524   |
| H314 | 6.228337250  | 11.374664327 | 6.421284472   |
| H315 | 4.744446825  | 11.186781241 | 7.088413156   |
| H316 | 5.310410651  | 3.466856047  | 1.100024203   |
| H317 | 0.064696460  | -5.083814189 | 0.660670956   |
| H318 | -2.486868089 | -4.070028148 | 4.800860172   |
| H319 | 8.394108237  | 4.168961421  | 8.404390683   |
| H320 | 7.674846468  | 0.874328738  | 7.742695798   |
| H321 | 6.978239965  | 4.456265473  | 6.446934715   |
| H322 | 7.853611788  | 3.432440731  | 9.647745701   |
| H323 | 6.139801579  | -8.921575557 | 1.441249224   |
| H324 | 6.729897095  | 2.666243010  | 3.857978525   |
| H325 | 2.791395009  | 4.417901500  | 5.767999002   |
| H326 | 4.445987486  | -5.464290258 | 4.765953958   |

|       |              |              |               |
|-------|--------------|--------------|---------------|
| H327  | 3.643588194  | 3.750212789  | 8.049983111   |
| H328  | 4.728406378  | -2.824641609 | 8.973908585   |
| H329  | 3.477115288  | -2.003559936 | 6.913373447   |
| H330  | 6.793021220  | 9.864814012  | 8.118593081   |
| H331  | 5.133311299  | 2.441455366  | -0.863391813  |
| H332  | 8.598970345  | 4.195949994  | 3.770003385   |
| H333  | 7.403324072  | 2.257238271  | 2.521642483   |
| H334  | 8.951506907  | 6.571756096  | 3.570010477   |
| H335  | 4.031024200  | 6.378765007  | -0.582451080  |
| H336  | 4.057243346  | 2.501331008  | 11.675852467  |
| H337  | 4.479620418  | 0.848236853  | 8.565280737   |
| H338  | 5.636144292  | 2.091909922  | 8.047492860   |
| H339  | 2.579743654  | 2.337521020  | 8.296924762   |
| H340  | 2.335217806  | -4.280608206 | 4.521637598   |
| H341  | -1.970879897 | -6.444735569 | 1.237932624   |
| H342  | -4.082236610 | -6.621363662 | 2.679625832   |
| H343  | 2.433741761  | 3.105105328  | 4.597523047   |
| H344  | 8.765625085  | 4.860634260  | 5.162730205   |
| H345  | 7.630643857  | 5.807250718  | 6.876898732   |
| H346  | 3.741006745  | 5.506261346  | -2.025740060  |
| H347  | 7.076427975  | -1.803636727 | 9.141116533   |
| H348  | 7.239179249  | 0.778584154  | 6.035295103   |
| H349  | 1.720513486  | -5.199877299 | 5.929517390   |
| H350  | 4.794724084  | -7.988670085 | -0.971292217  |
| H351  | 6.872027498  | 4.251002154  | -2.922882642  |
| H352  | 7.173750322  | 2.547916267  | -2.516787391  |
| H353  | 10.321428785 | -1.673879917 | 7.470577381   |
| H354  | 9.712213577  | -0.549032536 | 8.491428270   |
| H355  | 11.068106410 | 3.529072108  | 7.090159956   |
| H356  | 9.403176556  | 2.017132595  | 7.501077330   |
| H357  | 12.620315584 | 1.301346284  | 6.879597682   |
| H358  | 10.729649557 | 3.224464162  | 5.370847862   |
| H359  | 9.899086459  | 3.077697382  | -2.444704613  |
| H360  | -4.119416754 | -3.344647900 | -12.992121875 |
| H361  | 9.703269391  | 9.121317666  | 2.155443347   |
| H362  | 9.195826509  | 6.882583216  | 0.622417980   |
| H363  | -5.600777328 | -5.036739889 | -10.979259611 |
| H364  | -4.758996588 | -2.188441183 | -10.160249959 |
| H365  | -6.423144737 | -2.745408259 | -10.411858553 |
| H366  | -6.378998031 | -5.537286257 | -4.572861629  |
| H367  | 0.362924975  | 0.695789365  | 1.360577525   |
| H368  | -1.443379093 | -0.925360856 | 0.638785126   |
| Mo369 | 4.360333308  | 0.156160593  | 4.517159655   |
| N370  | 2.372765754  | 2.070094174  | -0.162317623  |
| N371  | 2.321596142  | 0.949751809  | -0.178560511  |
| N372  | -6.271029843 | 2.173430668  | 7.271006598   |
| N373  | -8.706087904 | 2.514032459  | 4.461295305   |
| N374  | -8.850488306 | 5.152102839  | 3.446744855   |
| N375  | -6.294321200 | 6.195461475  | 3.958610237   |
| N376  | -4.686803854 | 4.474859085  | 2.321351199   |
| N377  | -5.683131004 | 5.274046060  | -0.215382505  |
| N378  | -5.260929845 | 8.142251017  | -0.303826944  |
| N379  | -2.626655762 | 8.770696313  | 0.681228164   |
| N380  | -0.828344150 | 7.002930680  | -0.424175682  |
| N381  | -1.469110778 | 5.928899989  | -3.191583003  |
| N382  | -2.492164353 | 8.336157183  | -4.342868614  |
| N383  | 5.487342778  | 10.691829726 | 6.593295716   |
| N384  | 6.241316458  | 8.476498632  | 5.277627546   |
| N385  | 4.897365831  | 4.347220554  | 0.777625305   |
| N386  | 3.906589960  | 5.474301278  | -1.024419982  |
| N387  | 4.739828576  | 3.316193571  | -1.275724702  |
| N388  | 8.847182549  | 7.521000728  | 3.151687909   |

|      |               |              |               |
|------|---------------|--------------|---------------|
| N389 | -5.214184222  | -1.664603545 | 4.608237249   |
| N390 | -1.012760365  | -0.353370435 | 6.401066957   |
| N391 | -5.763796191  | -2.305575467 | 2.118765546   |
| N392 | -8.263287522  | -1.797527938 | 1.042542890   |
| N393 | -7.935224399  | 0.629865450  | -0.259632157  |
| N394 | -5.961597182  | 0.434873667  | -2.254320837  |
| N395 | -3.085769236  | -2.599451198 | -1.460937482  |
| N396 | -2.132832582  | -1.241812026 | -0.074446313  |
| N397 | -6.876331926  | -0.373490847 | -4.734372914  |
| N398 | -10.162694222 | -3.428655064 | -6.255265834  |
| N399 | -10.362517473 | -3.187089083 | -8.451779567  |
| N400 | 8.845266136   | 2.015293098  | -4.564386673  |
| N401 | 5.907418822   | -3.026318754 | -7.360741447  |
| N402 | 4.285532179   | -6.124077980 | -6.693966119  |
| N403 | 1.845714906   | -6.367213386 | -5.347523817  |
| N404 | -2.478720326  | -7.181432360 | -3.038394787  |
| N405 | -2.137661489  | -9.180975544 | -4.207414066  |
| N406 | -3.747321207  | -7.675857701 | -4.920037678  |
| N407 | 0.578051792   | -3.811572122 | -5.411219195  |
| N408 | 0.462855695   | -3.367247532 | -8.185905900  |
| N409 | -0.969523634  | -5.002928773 | -9.995877373  |
| N410 | -1.788479485  | -7.032588991 | -7.654392066  |
| N411 | -3.575378631  | -4.543127017 | -10.777889789 |
| N412 | 5.799453597   | -6.540511427 | 8.256709632   |
| N413 | 3.725070802   | -5.510144309 | 5.494769405   |
| N414 | 2.392229662   | -6.415294430 | 2.917654771   |
| N415 | 4.268382663   | -7.219186755 | 0.904812892   |
| N416 | -0.057249344  | -7.630561041 | 7.407342406   |
| N417 | -1.946228207  | -7.266328148 | 5.279225483   |
| N418 | 9.453961760   | -1.204550990 | 7.746870448   |
| N419 | 5.267116194   | -0.879664261 | 6.514659450   |
| N420 | 5.123945106   | -2.186930186 | 8.288879734   |
| N421 | 10.049612583  | 1.754668192  | 6.757460538   |
| N422 | 0.046393212   | -1.076239417 | -2.219378972  |
| N423 | 0.864373941   | -0.982319194 | -1.450778629  |
| O424 | -6.515292335  | 3.123991988  | 4.570285568   |
| O425 | -7.989652819  | 4.395743733  | 1.477315086   |
| O426 | -6.649452640  | 7.770854487  | 2.341390693   |
| O427 | -3.302484069  | 6.259643753  | 2.056562408   |
| O428 | -3.702573888  | 4.618452052  | -1.123987183  |
| O429 | -4.787605136  | 7.822283084  | -2.515256351  |
| O430 | -2.702239768  | 10.710652484 | -0.543212818  |
| O431 | 0.961931788   | 8.016239019  | 0.605108939   |
| O432 | 0.712116361   | 6.579353515  | -3.349165603  |
| O433 | -1.134020988  | 7.882519958  | -6.105196265  |
| O434 | -1.068055832  | 11.375362846 | -5.599033898  |
| O435 | 7.179806855   | 7.506152923  | 7.156731595   |
| O436 | 7.471758752   | 9.341011215  | 2.861777655   |
| O437 | 11.161517608  | 7.382041593  | 0.398167696   |
| O438 | -5.499452437  | -0.178523145 | 1.302918379   |
| O439 | -2.800164831  | -1.727327677 | 6.109268603   |
| O440 | -7.766408016  | -2.954871774 | -0.865464319  |
| O441 | -6.013206497  | -4.971714504 | -0.484930842  |
| O442 | -10.085796743 | 0.534860929  | -1.067376916  |
| O443 | -6.297384919  | 2.605486451  | -2.873158930  |
| O444 | -4.976442466  | 0.416726631  | -5.729020194  |
| O445 | -7.788096259  | 0.537891208  | -8.034889483  |
| O446 | 9.731668669   | 5.042600323  | -2.967346648  |
| O447 | 2.686123396   | 1.592252239  | -6.607744203  |
| O448 | 3.292650713   | -4.349441282 | -7.721942016  |
| O449 | 0.982639509   | -7.623762983 | -7.065767076  |
| O450 | -1.412899656  | -4.928633588 | -5.222472094  |

|                 |              |                              |                                       |
|-----------------|--------------|------------------------------|---------------------------------------|
| O451            | -1.261646851 | -1.888435474                 | -7.869682374                          |
| O452            | 1.838645042  | -1.191870559                 | -6.434740137                          |
| O453            | -0.017575725 | -3.939416748                 | -11.786703258                         |
| O454            | -3.583408585 | -6.342866009                 | -12.178247181                         |
| O455            | -3.727439836 | -7.392506769                 | -8.806477418                          |
| O456            | -6.147860295 | -3.560110804                 | -13.081050744                         |
| O457            | -5.493865562 | -5.173032436                 | -4.768436948                          |
| O458            | 3.312530223  | -5.423648036                 | 7.754179357                           |
| O459            | 0.980504062  | -7.189263082                 | 4.546853021                           |
| O460            | 2.806748821  | -8.827179308                 | 0.189188356                           |
| O461            | 7.291257537  | -8.859395417                 | -0.241204949                          |
| O462            | -3.500660790 | -7.047270876                 | 6.936059633                           |
| O463            | -0.143890610 | -2.334104060                 | 8.591954799                           |
| O464            | 1.823007779  | -3.248824322                 | 8.072183805                           |
| O465            | -2.796633055 | -8.778237583                 | 2.177322932                           |
| O466            | 10.729755684 | 0.306050135                  | 5.153810768                           |
| O467            | 13.275897657 | 2.618678518                  | 5.464305353                           |
| O468            | 0.243872903  | 2.376279252                  | 5.838858754                           |
| O469            | 0.698786749  | 4.051725337                  | 7.227209860                           |
| O470            | 5.946218978  | 2.856646233                  | 10.438850267                          |
| O471            | 3.819767569  | 2.177406427                  | 10.780828116                          |
| O472            | 5.546343853  | 1.992782616                  | 5.099350554                           |
| O473            | 5.336813377  | 4.028992734                  | 6.046684255                           |
| O474            | 3.257584199  | 1.102599689                  | 6.034384079                           |
| O475            | 9.130878732  | 4.887070798                  | 4.239388110                           |
| O476            | 7.319339504  | 3.010028390                  | 3.139145705                           |
| O477            | -4.168283609 | -4.927460138                 | -2.510245908                          |
| O478            | 8.692354984  | 3.737497512                  | 9.244960012                           |
| O479            | 7.850462592  | 4.849995460                  | 6.735527951                           |
| S480            | 3.758746606  | -3.990212345                 | -3.967173422                          |
| S481            | 2.275477402  | -3.356065542                 | -0.366249986                          |
| S482            | 2.814432085  | -1.656019016                 | 4.332186699                           |
| S483            | 3.666133713  | -0.608932813                 | -2.136255722                          |
| S484            | 0.663989723  | -0.607136890                 | 1.638374379                           |
| S485            | 4.838655425  | -4.273316895                 | 2.551814152                           |
| S486            | 3.513574006  | 1.578064726                  | 2.778033053                           |
| S487            | 5.894196261  | -3.082824671                 | -0.841111312                          |
| S488            | 6.313345924  | -0.786811638                 | 3.507392700                           |
| S489            | 6.294047730  | 0.880071982                  | 0.203758148                           |
| <b>2, 35(2)</b> |              | <b>bm22b2n2x2n2n35.car_2</b> |                                       |
| Fe1             | 3.24         | C1                           | -7.332362873 3.045685911 5.219511714  |
| Fe2             | 0.06         | C2                           | -7.359164925 2.709930559 6.713115288  |
| Fe3             | -2.68        | C3                           | -8.614608194 3.139468179 3.125845324  |
| Fe4             | 2.95         | C4                           | -8.270145992 4.556434582 2.671553347  |
| Fe5             | -2.33        | C5                           | -8.233501303 6.939589194 3.200906342  |
| Fe6             | 0.13         | C6                           | -6.726170652 7.214584425 3.142863038  |
| Fe7             | 2.11         | C7                           | -4.503185201 6.568415185 3.942358474  |
|                 |              | C8                           | -3.897216579 5.889281875 2.710017322  |
|                 |              | C9                           | -3.998326799 4.021956815 1.141803445  |
|                 |              | C10                          | -4.285593509 4.807286386 -0.147708580 |
|                 |              | C11                          | -5.757641453 6.308723829 -1.357809814 |
|                 |              | C12                          | -4.969881701 7.623535695 -1.440430447 |
|                 |              | C13                          | -4.347111446 9.703221273 -0.306511075 |
|                 |              | C14                          | -2.833234130 9.843077527 -0.101400960 |
|                 |              | C15                          | -0.823562606 8.960203611 1.015460015  |
|                 |              | C16                          | 0.108240824 7.954648416 0.328781188   |
|                 |              | C17                          | 0.174813846 5.969277106 -1.177850406  |
|                 |              | C18                          | 0.013785284 6.171828489 -2.695282220  |
|                 |              | C19                          | -0.279299721 4.571855975 -0.691890232 |
|                 |              | C20                          | 0.218934041 3.479557055 -1.643069271  |
|                 |              | C21                          | 0.158086422 4.345645589 0.759147890   |

|     |               |              |              |
|-----|---------------|--------------|--------------|
| C22 | -1.470518703  | 6.060366560  | -4.647095355 |
| C23 | -1.472098149  | 7.521960866  | -5.128840546 |
| C24 | -2.750106755  | 5.286853306  | -5.047779979 |
| C25 | -3.062622092  | 5.470796215  | -6.536778644 |
| C26 | -2.607922438  | 3.794756849  | -4.715845014 |
| C27 | -2.237291613  | 9.795169660  | -4.780334683 |
| C28 | -0.864930683  | 10.410845266 | -4.971781874 |
| C29 | 6.511492478   | 9.359742943  | 7.249183736  |
| C30 | 6.984881291   | 8.163494609  | 6.423693279  |
| C31 | 7.037286802   | 7.264430164  | 4.094167974  |
| C32 | 8.090620095   | 7.904529634  | 3.168746345  |
| C33 | 5.786659373   | 6.822050436  | 3.315329741  |
| C34 | 6.085292374   | 5.804397946  | 2.213100606  |
| C35 | 4.803171846   | 5.154337209  | 1.691330312  |
| C36 | 4.676660903   | 4.146362550  | -0.596831087 |
| C37 | 10.304924337  | 7.634492690  | 2.151658698  |
| C38 | 10.448588649  | 6.910320816  | 0.830244870  |
| C39 | -4.851877283  | -0.383917387 | 3.698950052  |
| C40 | -5.417499694  | -0.745719120 | 2.316090162  |
| C41 | -3.319468401  | -0.238905347 | 3.558044225  |
| C42 | -2.589663253  | 0.417875446  | 4.747597841  |
| C43 | -2.122511885  | -0.549382584 | 5.834182916  |
| C44 | -6.176926321  | -2.625330537 | 0.930245178  |
| C45 | -7.554800574  | -2.224962581 | 0.389169257  |
| C46 | -6.021229717  | -4.159904910 | 0.936468850  |
| C47 | -9.487428942  | -0.741004147 | 0.631981766  |
| C48 | -9.177822773  | 0.500758523  | -0.217479977 |
| C49 | -7.499449274  | 2.163374890  | -0.898877344 |
| C50 | -6.507405046  | 1.942594482  | -2.040874175 |
| C51 | -5.010372611  | 0.408327281  | -3.237999832 |
| C52 | -5.673429064  | 0.352195332  | -4.639245660 |
| C53 | -4.327912255  | -0.954495262 | -3.049589728 |
| C54 | -3.513265521  | -1.168180746 | -1.812196933 |
| C55 | -2.850909689  | -0.342332491 | -0.936352698 |
| C56 | -2.405885762  | -2.438960486 | -0.345382161 |
| C57 | -7.672757743  | -0.446538414 | -5.860411018 |
| C58 | -7.858208892  | 0.813403983  | -6.705017991 |
| C59 | -9.042283135  | -1.036211941 | -5.449847846 |
| C60 | -9.739494973  | -1.875447375 | -6.480016283 |
| C61 | -9.859415315  | -1.718725779 | -7.848228538 |
| C62 | -10.922392004 | -3.546264055 | -7.183045011 |
| C63 | 8.468971267   | 2.978915578  | -4.219383813 |
| C64 | 9.516640557   | 3.472563045  | -3.238502337 |
| C65 | 7.125160656   | 2.950191365  | -3.455574750 |
| C66 | 5.951142032   | 2.569284792  | -4.327477066 |
| C67 | 5.233495398   | 3.538052730  | -5.053653696 |
| C68 | 5.535296676   | 1.229634140  | -4.426796034 |
| C69 | 4.133188580   | 3.187300527  | -5.843280676 |
| C70 | 4.447202240   | 0.862994711  | -5.218789239 |
| C71 | 3.744614032   | 1.843711020  | -5.923135627 |
| C72 | 4.998922156   | -4.174013546 | -6.418167713 |
| C73 | 3.878896726   | -5.030930342 | -7.021114447 |
| C74 | 4.436889334   | -3.281406864 | -5.300268466 |
| C75 | 2.895400374   | -7.277781216 | -7.180190834 |
| C76 | 1.528903499   | -7.160917936 | -6.500821657 |
| C77 | 0.240001469   | -6.228741089 | -4.611575421 |
| C78 | -0.458187192  | -4.934523461 | -5.080219364 |
| C79 | 0.522249339   | -6.239596038 | -3.097617352 |
| C80 | -0.674491068  | -6.056576674 | -2.157624806 |
| C81 | -1.677596139  | -7.220267955 | -2.061369207 |
| C82 | -3.196344770  | -7.914493751 | -3.925063829 |
| C83 | -0.262179731  | -2.631012163 | -5.866654349 |



|       |              |              |               |
|-------|--------------|--------------|---------------|
| C84   | -0.569683997 | -2.632590784 | -7.376546946  |
| C85   | 0.583061290  | -1.389234450 | -5.552217937  |
| C86   | 0.298473481  | -3.193656696 | -9.593540805  |
| C87   | -0.490948924 | -4.111265355 | -10.524380945 |
| C88   | -2.024344895 | -6.024608488 | -10.738547643 |
| C89   | -3.416679213 | -5.589330664 | -11.240459936 |
| C90   | -2.113675848 | -7.372871666 | -9.989070635  |
| C91   | -2.932168652 | -7.253159858 | -8.708709364  |
| C92   | -5.283071641 | -4.017830575 | -10.971554063 |
| C93   | -5.412395715 | -3.532845804 | -12.410951316 |
| C94   | -5.688620956 | -2.881705834 | -9.993257035  |
| C95   | -5.742914358 | -3.353539264 | -8.558508192  |
| C96   | -6.883028926 | -4.015253838 | -8.073140551  |
| C97   | -4.645377530 | -3.203771541 | -7.693986883  |
| C98   | -6.925573275 | -4.528977643 | -6.774383110  |
| C99   | -4.660048586 | -3.733718837 | -6.398699396  |
| C100  | -5.801049632 | -4.400640551 | -5.957318331  |
| C101  | 5.425209710  | -5.957206828 | 6.997125601   |
| C102  | 3.947877952  | -5.688694338 | 6.765472189   |
| C103  | 2.202569168  | -5.308143691 | 5.047036137   |
| C104  | 1.610921379  | -6.418956851 | 4.172655885   |
| C105  | 1.714452445  | -7.515215831 | 1.984149255   |
| C106  | 2.743689189  | -8.021187911 | 0.977448364   |
| C107  | 4.925714491  | -7.772261960 | -0.104293963  |
| C108  | 5.946494564  | -8.774007517 | 0.400825861   |
| C109  | -1.378562259 | -6.582487299 | 7.624645990   |
| C110  | -2.535598693 | -6.867833796 | 6.659022169   |
| C111  | -0.978238240 | -5.091378394 | 7.530115846   |
| C112  | -0.097002336 | -4.671243186 | 8.719665386   |
| C113  | 0.508143421  | -3.304756617 | 8.482846026   |
| C114  | -3.220974314 | -7.362002072 | 4.360313759   |
| C115  | -2.805697816 | -8.505766736 | 3.454996196   |
| C116  | -3.705086051 | -6.091828224 | 3.618853052   |
| C117  | -2.554102515 | -5.245535671 | 3.141727563   |
| C118  | -1.883881416 | -5.538930929 | 1.941266553   |
| C119  | -2.052774210 | -4.216541082 | 3.958877530   |
| C120  | -0.712586580 | -4.852377313 | 1.600988347   |
| C121  | -0.880944506 | -3.533242348 | 3.618212616   |
| C122  | -0.191894923 | -3.871082029 | 2.450324748   |
| C123  | 8.991205824  | -0.806586734 | 6.464991538   |
| C124  | 10.049667338 | 0.177652060  | 5.942525319   |
| C125  | 7.663936177  | -0.109415643 | 6.806680280   |
| C126  | 6.523453963  | -1.012784594 | 7.165238621   |
| C127  | 6.414546816  | -1.818916632 | 8.281908127   |
| C128  | 4.515208826  | -1.868541746 | 7.143342901   |
| C129  | 11.212264395 | 2.302917855  | 6.142054671   |
| C130  | 12.576313184 | 1.663242403  | 6.002999604   |
| C131  | 1.307967262  | 3.197914849  | 6.167210047   |
| C132  | 2.693320171  | 3.314573447  | 5.602289557   |
| C133  | 3.724479250  | 2.315806952  | 6.269295807   |
| C134  | 3.775778165  | 2.569909369  | 7.802564108   |
| C135  | 4.905350354  | 1.789285417  | 8.494837439   |
| C136  | 5.161282900  | 2.218838029  | 9.912601121   |
| C137  | 5.122937596  | 2.703695997  | 5.691372704   |
| C138  | 3.891496617  | -1.421383810 | 1.172554052   |
| Fe139 | 4.512053469  | -2.287312326 | 2.945365388   |
| Fe140 | 2.164122008  | -1.045221790 | -0.216892164  |
| Fe141 | 5.073023761  | -1.196874847 | -0.459433902  |
| Fe142 | 4.103544681  | -3.337097414 | 0.646963430   |
| Fe143 | 3.847364262  | -3.013170615 | -1.995155644  |
| Fe144 | 5.111349400  | -0.025367123 | 1.852582126   |
| Fe145 | 2.757757521  | -0.597929035 | 2.452520730   |

|      |              |              |              |
|------|--------------|--------------|--------------|
| H146 | -5.440960034 | 3.273915388  | 7.116298492  |
| H147 | -5.622134660 | 1.658194850  | 6.959567376  |
| H148 | -9.310227229 | 2.508137249  | 5.046780296  |
| H149 | -7.999745400 | 1.830184480  | 6.878996553  |
| H150 | -7.867253185 | 3.553964330  | 7.212802017  |
| H151 | -7.934409765 | 2.468957734  | 2.582389026  |
| H152 | -9.008745712 | 5.343993478  | 4.419182781  |
| H153 | -9.643343133 | 2.915194000  | 2.813463644  |
| H154 | -8.684050177 | 7.595605704  | 3.958184162  |
| H155 | -6.376935762 | 5.715841316  | 4.502571419  |
| H156 | -8.646337462 | 7.214914504  | 2.221213307  |
| H157 | -2.912838786 | 3.856086721  | 1.171611074  |
| H158 | -5.159443814 | 4.268071111  | 2.938832855  |
| H159 | -4.098091727 | 6.101943384  | 4.850602226  |
| H160 | -5.532310341 | 5.738221625  | -2.266907303 |
| H161 | -6.136163834 | 5.406119666  | 0.562012696  |
| H162 | -4.186098692 | 7.617487818  | 3.922446892  |
| H163 | -4.493556169 | 3.040537249  | 1.097769547  |
| H164 | -5.390230723 | 8.045499449  | 0.543668301  |
| H165 | -6.831862499 | 6.540514028  | -1.345592653 |
| H166 | -0.277193698 | 5.107321487  | 1.423030972  |
| H167 | -0.180788121 | 3.360047870  | 1.113035083  |
| H168 | 1.252648733  | 4.375915892  | 0.861354137  |
| H169 | -1.379841172 | 4.558514632  | -0.715173190 |
| H170 | -4.840406547 | 10.281008491 | 0.488675109  |
| H171 | -2.480164028 | 3.611789369  | -3.640140652 |
| H172 | -2.750992854 | 8.097292531  | -3.593190180 |
| H173 | -3.245587688 | 6.522393271  | -6.799780679 |
| H174 | -0.035710181 | 2.487055140  | -1.246869018 |
| H175 | 1.309731577  | 3.517451662  | -1.764450167 |
| H176 | 8.385787340  | 3.739466853  | -5.019613945 |
| H177 | -3.506978717 | 3.250611715  | -5.038824609 |
| H178 | -3.956771771 | 4.889731583  | -6.803332297 |
| H179 | -1.742361969 | 3.364941309  | -5.245121595 |
| H180 | -2.225760273 | 5.110444432  | -7.155798795 |
| H181 | -3.591467556 | 5.698974302  | -4.461163999 |
| H182 | -0.607140179 | 5.601981014  | -5.154083239 |
| H183 | -1.988525981 | 5.631574521  | -2.603442986 |
| H184 | -0.237907667 | 3.570518112  | -2.638561457 |
| H185 | 0.898835424  | -1.431872692 | -4.497215053 |
| H186 | -0.073277748 | -0.514603876 | -5.686520112 |
| H187 | 1.982868301  | -0.380663549 | -6.484998270 |
| H188 | 2.221077353  | 2.198872844  | -7.075695203 |
| H189 | 4.120539703  | -0.176125627 | -5.259388606 |
| H190 | 6.042169681  | 0.462099281  | -3.837347961 |
| H191 | 5.529796015  | 4.589223374  | -4.996231869 |
| H192 | -1.524580529 | 7.088922718  | -0.513380867 |
| H193 | -0.714149759 | 8.811509596  | 2.099788956  |
| H194 | -0.459430312 | 9.967112098  | 0.773596773  |
| H195 | -2.790654042 | 8.158817566  | 1.114853627  |
| H196 | -4.571991153 | 10.182669123 | -1.267773289 |
| H197 | 3.573346452  | 3.955065947  | -6.384383842 |
| H198 | 1.246365272  | 6.099915120  | -0.975617759 |
| H199 | -2.820319709 | 9.934943142  | -5.705766167 |
| H200 | -2.735575235 | 10.360821436 | -3.977275706 |
| H201 | -0.047469367 | 9.929242947  | -4.385943905 |
| H202 | 11.255278020 | 7.579309033  | 2.703593135  |
| H203 | -0.592054422 | -0.878866797 | 7.155436077  |
| H204 | 1.736212426  | 4.671010641  | 7.334900810  |
| H205 | -0.714654473 | -4.621762201 | 9.628066109  |
| H206 | 0.699370691  | -5.412141019 | 8.882546104  |
| H207 | -1.877532736 | -4.456360655 | 7.511142082  |

|      |               |              |               |
|------|---------------|--------------|---------------|
| H208 | -2.156388136  | -9.267059852 | 3.947589570   |
| H209 | -1.824950065  | -6.744067343 | 8.617709972   |
| H210 | -2.889288423  | -1.234329452 | 3.360054815   |
| H211 | -3.244731280  | 1.161302004  | 5.233813336   |
| H212 | -1.214809200  | -7.085720723 | 5.071872725   |
| H213 | -4.088659685  | -7.763039278 | 4.922556714   |
| H214 | 0.260379498   | -7.374285566 | 6.629217822   |
| H215 | -0.366189574  | 0.529083681  | 6.119175526   |
| H216 | -0.455153298  | -4.925048710 | 6.576102801   |
| H217 | 0.339023775   | -7.499971086 | 8.269991196   |
| H218 | -6.045604383  | -1.109573237 | 5.222396852   |
| H219 | -3.137272514  | 0.378929573  | 2.667297464   |
| H220 | 2.182302685   | -4.195660071 | 7.941954298   |
| H221 | -1.726294135  | 0.983643498  | 4.369931249   |
| H222 | -4.269416822  | 1.218905597  | -3.282862037  |
| H223 | -2.790945424  | 0.738225363  | -0.882402334  |
| H224 | -8.400773178  | 2.606773965  | -1.342529153  |
| H225 | -7.218339479  | 0.563436730  | 0.488087671   |
| H226 | -7.417766654  | -0.236950113 | -3.744107970  |
| H227 | -9.473103218  | -0.974361771 | -8.534997463  |
| H228 | -7.996976555  | 1.746257366  | -6.104507189  |
| H229 | -9.694279699  | -0.217633968 | -5.096997786  |
| H230 | -7.102477167  | -1.180846533 | -6.451375587  |
| H231 | -11.514060039 | -4.455385377 | -7.246273357  |
| H232 | -3.673633402  | -1.105151587 | -3.923927064  |
| H233 | -5.096165194  | -1.743560451 | -3.102093272  |
| H234 | -10.881183918 | -2.985462834 | -9.236902192  |
| H235 | -8.871468514  | -1.690281751 | -4.581195777  |
| H236 | -6.145715852  | -0.002522407 | -1.451735808  |
| H237 | -7.070658340  | 2.918573754  | -0.223473237  |
| H238 | -10.064822074 | -1.427413433 | 0.000221628   |
| H239 | -1.994114510  | -3.294029979 | 0.184633175   |
| H240 | -10.127989170 | -0.431577749 | 1.468870781   |
| H241 | 9.587162983   | 1.714120134  | -5.379294477  |
| H242 | 8.038908848   | 1.229155597  | -5.188397760  |
| H243 | 1.327750969   | -3.882220131 | -5.087592022  |
| H244 | -1.232406024  | -2.507668266 | -5.364060257  |
| H245 | 1.033636399   | -3.865073459 | -7.731310587  |
| H246 | -3.599187714  | -3.338725499 | -1.865157389  |
| H247 | -5.071423656  | -4.841163351 | -1.678468224  |
| H248 | -4.955899317  | -4.631461700 | -3.251420360  |
| H249 | -4.998914255  | -4.417413860 | 1.245905981   |
| H250 | -6.729243470  | -4.608360613 | 1.653052649   |
| H251 | -1.091838430  | -7.725902400 | -9.786470792  |
| H252 | -2.611197968  | -8.093007683 | -10.651626006 |
| H253 | -1.204606299  | -7.216098927 | -7.496394845  |
| H254 | -2.726431161  | -6.863211106 | -6.714715143  |
| H255 | -2.900237499  | -9.714222289 | -4.852144890  |
| H256 | -2.071387827  | -7.289622892 | -1.036643956  |
| H257 | -7.825579864  | -5.029815432 | -6.408268778  |
| H258 | -3.750912684  | -2.663612995 | -8.017756240  |
| H259 | -4.612745756  | -6.640795598 | -4.722213859  |
| H260 | 1.244431446   | -5.440211766 | -2.867449112  |
| H261 | 2.330335596   | -5.996525670 | -4.996253002  |
| H262 | -1.212173307  | -5.123870535 | -2.389558178  |
| H263 | -7.977997811  | -1.197735964 | 2.090274693   |
| H264 | 3.255696260   | -8.305826452 | -7.038476343  |
| H265 | -5.737967718  | -2.562458785 | 3.091469619   |
| H266 | 1.020452345   | -7.195399490 | -2.865120571  |
| H267 | -3.773111623  | -3.668393327 | -5.765334683  |
| H268 | -6.975343597  | -4.169412895 | -0.763621972  |
| H269 | 2.716955534   | -7.128909366 | -8.254008843  |

|      |              |              |               |
|------|--------------|--------------|---------------|
| H270 | -2.106173219 | -9.554184005 | -3.327758584  |
| H271 | -4.654597230 | -8.264779416 | -5.314424184  |
| H272 | -4.437415380 | -1.546752180 | 5.346177816   |
| H273 | -5.262685270 | 0.617702080  | 3.928079371   |
| H274 | -7.757124316 | -4.134953699 | -8.717821367  |
| H275 | -5.478019023 | -2.223790171 | 0.177111771   |
| H276 | -0.453755505 | -7.038255449 | -4.876165778  |
| H277 | -1.166884886 | -8.170712005 | -2.258754184  |
| H278 | -0.245936375 | -5.914272836 | -1.156152608  |
| H279 | -3.405881012 | -6.225871019 | -2.817661287  |
| H280 | -0.039079184 | -2.168449402 | -9.807530561  |
| H281 | -1.295739464 | -5.114258988 | -8.923925865  |
| H282 | -1.428789127 | -6.181481493 | -11.649818935 |
| H283 | 1.352321703  | -3.271030892 | -9.895195438  |
| H284 | -3.376092516 | -3.981541285 | -9.983612710  |
| H285 | 5.843766764  | -6.506751677 | 6.141977201   |
| H286 | 5.915602254  | -4.962050398 | 7.012303767   |
| H287 | 8.816757030  | -1.509799830 | 5.637629785   |
| H288 | 6.599529860  | -6.711167438 | 8.486371318   |
| H289 | 5.098521846  | -6.279055431 | 8.981202938   |
| H290 | 5.269981262  | -2.715546851 | -4.864549499  |
| H291 | 4.915628101  | -2.813483993 | -7.935435181  |
| H292 | 4.631157040  | -6.694188930 | -6.078166578  |
| H293 | 3.710066042  | -2.579208443 | -5.732271869  |
| H294 | 6.107245676  | -3.915813364 | -8.123865410  |
| H295 | 5.453370246  | -6.872617519 | -0.457545343  |
| H296 | 5.767319519  | -4.834423938 | -5.987030239  |
| H297 | 5.298106543  | 7.714387463  | 2.889996670   |
| H298 | 7.469183157  | 6.395780986  | 4.604473813   |
| H299 | 4.152875246  | -6.556162009 | 1.456219873   |
| H300 | 4.586624966  | 3.043962417  | -2.324012024  |
| H301 | 1.353287104  | -8.383805649 | 2.550681796   |
| H302 | -0.492977999 | -2.746142869 | 4.268106378   |
| H303 | 0.858102645  | -7.153853526 | 1.389819758   |
| H304 | 4.113558470  | 5.902585188  | 1.278813837   |
| H305 | 2.793597640  | -5.743547107 | 2.654532222   |
| H306 | 4.268651034  | 4.658576160  | 2.516948063   |
| H307 | 5.093829946  | 6.382901075  | 4.051148526   |
| H308 | 6.735550199  | 5.003516434  | 2.595577399   |
| H309 | 6.617690047  | 6.286090724  | 1.376799147   |
| H310 | -4.332454966 | -5.520772569 | 4.318065624   |
| H311 | 6.219543556  | 9.113028519  | 4.839837364   |
| H312 | 5.677050645  | 8.993027374  | 7.866914752   |
| H313 | 0.743246299  | -3.378415000 | 2.180664630   |
| H314 | 6.812787966  | 11.136454874 | 6.247459912   |
| H315 | 5.328125719  | 11.013886728 | 6.930629437   |
| H316 | 5.461532613  | 3.247216835  | 1.023780767   |
| H317 | -0.171745554 | -5.074432595 | 0.679495009   |
| H318 | -2.578908342 | -3.950867215 | 4.878376393   |
| H319 | 8.689611684  | 3.850167221  | 8.247656517   |
| H320 | 7.833317500  | 0.577433935  | 7.654917584   |
| H321 | 7.268950827  | 4.183739120  | 6.306392971   |
| H322 | 8.138598496  | 3.143267654  | 9.505622718   |
| H323 | 5.763059157  | -9.162877058 | 1.431352228   |
| H324 | 6.895596736  | 2.392298183  | 3.741694890   |
| H325 | 3.082168234  | 4.338276230  | 5.705274974   |
| H326 | 4.270049704  | -5.605056586 | 4.738138174   |
| H327 | 3.927273930  | 3.647246366  | 7.971824606   |
| H328 | 4.727036323  | -2.964714304 | 8.940773518   |
| H329 | 3.490243117  | -2.105465182 | 6.886036044   |
| H330 | 7.333929178  | 9.604542172  | 7.943623940   |
| H331 | 5.199955080  | 2.168924345  | -0.912632269  |

|       |              |              |               |
|-------|--------------|--------------|---------------|
| H332  | 8.823790862  | 3.839467545  | 3.604345881   |
| H333  | 7.553503049  | 1.922612677  | 2.417978577   |
| H334  | 9.266173196  | 6.201330145  | 3.380495730   |
| H335  | 4.265769527  | 6.155863398  | -0.727575304  |
| H336  | 4.326269485  | 2.420197067  | 11.597100772  |
| H337  | 4.654784898  | 0.717319803  | 8.491287609   |
| H338  | 5.852325112  | 1.915478671  | 7.958182870   |
| H339  | 2.810119553  | 2.279946190  | 8.241837800   |
| H340  | 2.215433043  | -4.348850600 | 4.505482483   |
| H341  | -2.269958019 | -6.330493724 | 1.293784605   |
| H342  | -4.337701313 | -6.426812933 | 2.782980560   |
| H343  | 2.655584816  | 3.042283352  | 4.538753821   |
| H344  | 9.044170788  | 4.508100231  | 4.987583951   |
| H345  | 7.986148088  | 5.506433851  | 6.713020376   |
| H346  | 3.894761755  | 5.249163815  | -2.128162209  |
| H347  | 7.118631339  | -2.041844429 | 9.075697747   |
| H348  | 7.357295372  | 0.512789853  | 5.956312633   |
| H349  | 1.576150591  | -5.213149881 | 5.936044805   |
| H350  | 4.413184699  | -8.222226563 | -0.969045084  |
| H351  | 6.966550886  | 3.950205023  | -3.025193370  |
| H352  | 7.217178723  | 2.238973519  | -2.619398960  |
| H353  | 10.348042814 | -2.096101683 | 7.304153465   |
| H354  | 9.822256152  | -0.948146660 | 8.345419534   |
| H355  | 11.300635542 | 3.095390524  | 6.901723296   |
| H356  | 9.588274948  | 1.650510109  | 7.358255954   |
| H357  | 12.762758930 | 0.801550534  | 6.687462571   |
| H358  | 10.926069902 | 2.782393163  | 5.191884641   |
| H359  | 9.975799155  | 2.673433909  | -2.607945243  |
| H360  | -4.453393252 | -3.247433452 | -12.903887219 |
| H361  | 10.108842855 | 8.695036980  | 1.915120670   |
| H362  | 9.509225999  | 6.451949719  | 0.435483879   |
| H363  | -5.981470829 | -4.861586188 | -10.846429836 |
| H364  | -4.977384236 | -2.047255079 | -10.099611445 |
| H365  | -6.673030988 | -2.513026046 | -10.315480900 |
| H366  | -6.668098051 | -5.315187817 | -4.470548579  |
| H367  | 0.384697871  | 0.629013576  | 1.374086751   |
| H368  | -1.473106212 | -0.873259094 | 0.665374553   |
| Mo369 | 4.427953148  | -0.007985225 | 4.456945349   |
| N370  | 2.387028574  | 1.914540943  | -0.193438929  |
| N371  | 2.315330884  | 0.795885835  | -0.188570111  |
| N372  | -6.066635215 | 2.495945623  | 7.343207804   |
| N373  | -8.519933401 | 2.927320719  | 4.563087361   |
| N374  | -8.567559203 | 5.562972796  | 3.529163464   |
| N375  | -5.954759013 | 6.491142048  | 3.993060852   |
| N376  | -4.448382036 | 4.702061396  | 2.348521664   |
| N377  | -5.445070044 | 5.509281972  | -0.184573372  |
| N378  | -4.895178468 | 8.354869513  | -0.296907145  |
| N379  | -2.229281947 | 8.881211802  | 0.652938865   |
| N380  | -0.509336497 | 7.040413315  | -0.461090887  |
| N381  | -1.238256860 | 5.976788886  | -3.204035934  |
| N382  | -2.163762925 | 8.408088196  | -4.369466017  |
| N383  | 6.045753592  | 10.486181046 | 6.431668268   |
| N384  | 6.673472556  | 8.235628988  | 5.116521443   |
| N385  | 5.079063927  | 4.133294595  | 0.680332166   |
| N386  | 4.079952173  | 5.242380347  | -1.129514514  |
| N387  | 4.832279819  | 3.049433812  | -1.338552253  |
| N388  | 9.198366151  | 7.151591119  | 2.956388793   |
| N389  | -5.225340885 | -1.402474642 | 4.687147491   |
| N390  | -0.934545843 | -0.271759192 | 6.403495759   |
| N391  | -5.831053906 | -2.035995472 | 2.207256228   |
| N392  | -8.317792768 | -1.422319952 | 1.158198733   |
| N393  | -7.901984984 | 0.984826097  | -0.151514040  |

|      |               |              |               |
|------|---------------|--------------|---------------|
| N394 | -5.972819212  | 0.687830211  | -2.177980608  |
| N395 | -3.220322135  | -2.466302847 | -1.409217072  |
| N396 | -2.186228271  | -1.155872156 | -0.038031061  |
| N397 | -6.948975891  | -0.112693160 | -4.638166459  |
| N398 | -10.408893041 | -3.020658243 | -6.077565533  |
| N399 | -10.611935094 | -2.792626694 | -8.275703053  |
| N400 | 8.833197901   | 1.642033525  | -4.691769403  |
| N401 | 5.646168822   | -3.323083521 | -7.427463299  |
| N402 | 3.913216524   | -6.357936369 | -6.714169053  |
| N403 | 1.485009004   | -6.487777864 | -5.330612540  |
| N404 | -2.833070555  | -7.077284105 | -2.956173204  |
| N405 | -2.596374784  | -9.109543013 | -4.095751194  |
| N406 | -4.139347686  | -7.541343180 | -4.820232501  |
| N407 | 0.337783795   | -3.871688245 | -5.381517989  |
| N408 | 0.206654728   | -3.437341566 | -8.160191360  |
| N409 | -1.330446353  | -5.017131972 | -9.940308738  |
| N410 | -2.210994996  | -7.024794673 | -7.578898919  |
| N411 | -3.927562688  | -4.461733932 | -10.690188906 |
| N412 | 5.611694417   | -6.739780475 | 8.224142734   |
| N413 | 3.557300556   | -5.628433323 | 5.478327301   |
| N414 | 2.140355975   | -6.503960415 | 2.935624901   |
| N415 | 3.945432246   | -7.395127883 | 0.898265571   |
| N416 | -0.296612368  | -7.563008248 | 7.471822205   |
| N417 | -2.197430396  | -7.128453211 | 5.364290515   |
| N418 | 9.512492412   | -1.585878192 | 7.605244659   |
| N419 | 5.323530818   | -1.065164051 | 6.458178493   |
| N420 | 5.141252238   | -2.346312853 | 8.248473943   |
| N421 | 10.211113795  | 1.356230691  | 6.606309299   |
| N422 | -0.036850853  | -1.156246274 | -2.208328985  |
| N423 | 0.797334960   | -1.096841815 | -1.452525928  |
| O424 | -6.306593729  | 3.456526844  | 4.644288048   |
| O425 | -7.752924968  | 4.756378173  | 1.560738885   |
| O426 | -6.268259057  | 8.078837877  | 2.377705577   |
| O427 | -2.963570277  | 6.404665998  | 2.076417416   |
| O428 | -3.490980892  | 4.788667994  | -1.100424279  |
| O429 | -4.471066325  | 8.000624388  | -2.513796432  |
| O430 | -2.237557297  | 10.817401985 | -0.579958378  |
| O431 | 1.329789033   | 8.004713093  | 0.532142991   |
| O432 | 0.972890106   | 6.492806862  | -3.411062576  |
| O433 | -0.871164969  | 7.869691465  | -6.158464394  |
| O434 | -0.665344467  | 11.400159518 | -5.661079149  |
| O435 | 7.586362392   | 7.222084920  | 6.983669588   |
| O436 | 7.906457292   | 9.035287345  | 2.685836522   |
| O437 | 11.500605246  | 6.836105848  | 0.216371607   |
| O438 | -5.477171985  | 0.071378171  | 1.373118542   |
| O439 | -2.814550399  | -1.532028256 | 6.186331360   |
| O440 | -7.891821337  | -2.603634038 | -0.753481508  |
| O441 | -6.233963533  | -4.704107252 | -0.375780819  |
| O442 | -10.076967788 | 1.007987283  | -0.898147297  |
| O443 | -6.223102876  | 2.867360575  | -2.805572723  |
| O444 | -5.039772192  | 0.613897582  | -5.664811989  |
| O445 | -7.897669815  | 0.825981917  | -7.923110094  |
| O446 | 9.832400087   | 4.647231161  | -3.107752388  |
| O447 | 2.662564191   | 1.427915756  | -6.674866606  |
| O448 | 2.991358054   | -4.551957959 | -7.751185886  |
| O449 | 0.543380304   | -7.712835489 | -7.032885645  |
| O450 | -1.696683689  | -4.904263608 | -5.182504083  |
| O451 | -1.452574290  | -1.890496890 | -7.829556701  |
| O452 | 1.709735566   | -1.319588796 | -6.429551060  |
| O453 | -0.367246363  | -3.996187402 | -11.749633247 |
| O454 | -4.011855325  | -6.250314723 | -12.102947121 |
| O455 | -4.173581856  | -7.271272785 | -8.721847540  |

|                 |                     |              |              |               |              |
|-----------------|---------------------|--------------|--------------|---------------|--------------|
|                 | O456                | -6.486437081 | -3.423027096 | -12.979548870 |              |
|                 | O457                | -5.777406381 | -4.968020353 | -4.670497851  |              |
|                 | O458                | 3.173754508  | -5.513496392 | 7.741913166   |              |
|                 | O459                | 0.718614611  | -7.184961272 | 4.600980605   |              |
|                 | O460                | 2.424886079  | -8.970259334 | 0.240806026   |              |
|                 | O461                | 6.904399262  | -9.142129588 | -0.259294700  |              |
|                 | O462                | -3.717165372 | -6.835188696 | 7.042158545   |              |
|                 | O463                | -0.110589631 | -2.254063710 | 8.634512478   |              |
|                 | O464                | 1.779527311  | -3.275971546 | 8.040741294   |              |
|                 | O465                | -3.169290019 | -8.640023773 | 2.294963655   |              |
|                 | O466                | 10.804062150 | -0.124261117 | 4.998893852   |              |
|                 | O467                | 13.453675455 | 2.095599629  | 5.267874555   |              |
|                 | O468                | 0.462078031  | 2.386199392  | 5.818214153   |              |
|                 | O469                | 0.980016354  | 4.075504093  | 7.169828458   |              |
|                 | O470                | 6.236618549  | 2.613984026  | 10.356115995  |              |
|                 | O471                | 4.059858042  | 2.117104181  | 10.703051293  |              |
|                 | O472                | 5.711401542  | 1.783389178  | 5.003102119   |              |
|                 | O473                | 5.612752012  | 3.830050454  | 5.944615093   |              |
|                 | O474                | 3.396707744  | 1.005531207  | 5.980630047   |              |
|                 | O475                | 9.390287458  | 4.514535523  | 4.056346965   |              |
|                 | O476                | 7.490171734  | 2.698107274  | 3.008917506   |              |
|                 | O477                | -4.419756021 | -4.749606902 | -2.428627843  |              |
|                 | O478                | 8.981929483  | 3.413342181  | 9.087686282   |              |
|                 | O479                | 8.163728260  | 4.540138550  | 6.576292462   |              |
|                 | S480                | 3.579015323  | -4.240516017 | -3.962871680  |              |
|                 | S481                | 2.097696576  | -3.509217866 | -0.455726775  |              |
|                 | S482                | 2.815464131  | -1.756841798 | 4.314706982   |              |
|                 | S483                | 3.657423060  | -0.794775989 | -2.137042741  |              |
|                 | S484                | 0.650165162  | -0.680396295 | 1.648486142   |              |
|                 | S485                | 4.693552405  | -4.479053436 | 2.529030700   |              |
|                 | S486                | 3.620755386  | 1.430078707  | 2.712816643   |              |
|                 | S487                | 5.845388531  | -3.264339000 | -0.851423404  |              |
|                 | S488                | 6.327527365  | -1.035847648 | 3.429184753   |              |
|                 | S489                | 6.326638081  | 0.572066350  | 0.102066685   |              |
| <b>3, 47(2)</b> | bm12b2n2x6n2n.car_2 |              |              |               |              |
| Fe1             | 3.04                | C1           | -8.016803016 | -5.184739633  | -0.202613948 |
| Fe2             | 0.50                | C2           | -8.110084498 | -6.344838489  | -1.197421179 |
| Fe3             | 2.85                | C3           | -9.119138959 | -3.194442185  | 0.726230205  |
| Fe4             | -2.24               | C4           | -8.918412379 | -3.459751170  | 2.215614072  |
| Fe5             | 2.55                | C5           | -9.198736058 | -4.989609666  | 4.097915789  |
| Fe6             | -0.21               | C6           | -7.735718974 | -5.277235145  | 4.456680112  |
| Fe7             | -2.00               | C7           | -5.531534679 | -5.962050397  | 3.641143478  |
|                 |                     | C8           | -4.744225108 | -4.648298532  | 3.687441458  |
|                 |                     | C9           | -4.494774166 | -2.375930754  | 2.828575647  |
|                 |                     | C10          | -4.800677339 | -1.596360163  | 4.116531904  |
|                 |                     | C11          | -6.396210851 | -1.016491931  | 5.841581473  |
|                 |                     | C12          | -5.768015730 | -1.620587196  | 7.105136424  |
|                 |                     | C13          | -5.409947757 | -3.650554480  | 8.429531789  |
|                 |                     | C14          | -3.931717292 | -4.043349993  | 8.552925555  |
|                 |                     | C15          | -1.918813845 | -4.854260074  | 7.392658514  |
|                 |                     | C16          | -0.845278272 | -3.868585500  | 6.918295385  |
|                 |                     | C17          | -0.455605425 | -1.642142315  | 5.873213227  |
|                 |                     | C18          | -0.555879683 | -0.386602639  | 6.757098538  |
|                 |                     | C19          | -0.755047993 | -1.363881138  | 4.380806367  |
|                 |                     | C20          | -0.065400957 | -0.077234525  | 3.919787131  |
|                 |                     | C21          | -0.377670863 | -2.576589451  | 3.524245149  |
|                 |                     | C22          | -1.897817476 | 1.553276484   | 7.435168451  |
|                 |                     | C23          | -2.047986644 | 1.309546404   | 8.946383324  |
|                 |                     | C24          | -3.055117963 | 2.389116410   | 6.834729040  |
|                 |                     | C25          | -3.302550667 | 3.659628476   | 7.656038082  |
|                 |                     | C26          | -2.765437235 | 2.750020298   | 5.371482689  |

|     |               |               |              |
|-----|---------------|---------------|--------------|
| C27 | -3.087497895  | 0.019712533   | 10.717650419 |
| C28 | -1.783580879  | -0.200742849  | 11.457296187 |
| C29 | 4.907069815   | -11.401702561 | 5.382170115  |
| C30 | 5.571748688   | -10.187124488 | 4.729601039  |
| C31 | 5.882330967   | -7.721581770  | 4.999373118  |
| C32 | 6.925728152   | -7.319323590  | 6.059277163  |
| C33 | 4.748179162   | -6.687691169  | 4.888570617  |
| C34 | 5.228075503   | -5.278239736  | 4.534584674  |
| C35 | 4.061484592   | -4.390891097  | 4.095249583  |
| C36 | 4.193057934   | -1.890203074  | 4.194390979  |
| C37 | 9.219129121   | -6.547117782  | 6.438966192  |
| C38 | 9.528441915   | -5.065589995  | 6.445189394  |
| C39 | -5.059325552  | -2.560240507  | -2.445917625 |
| C40 | -5.488321115  | -1.125688724  | -2.085437639 |
| C41 | -3.554442563  | -2.687216496  | -2.114197566 |
| C42 | -2.982605213  | -4.118321139  | -2.038566154 |
| C43 | -2.477173430  | -4.696853784  | -3.358091591 |
| C44 | -5.700673090  | 1.157859934   | -3.033761104 |
| C45 | -6.959372544  | 1.623190587   | -2.304988409 |
| C46 | -5.581782804  | 1.780939333   | -4.452088544 |
| C47 | -9.255894275  | 1.076149616   | -1.639833025 |
| C48 | -9.089370377  | 1.126964759   | -0.115455750 |
| C49 | -7.642216256  | 0.655106796   | 1.808844561  |
| C50 | -6.523755964  | 1.629380061   | 2.190374493  |
| C51 | -4.863963131  | 3.292019304   | 1.499041734  |
| C52 | -5.439210846  | 4.597534518   | 2.079262197  |
| C53 | -4.055266760  | 3.696024307   | 0.256775770  |
| C54 | -3.312828153  | 2.604724355   | -0.447471220 |
| C55 | -2.998752244  | 1.320749470   | -0.061576506 |
| C56 | -2.187695640  | 1.715717791   | -2.086694476 |
| C57 | -7.178809571  | 6.305404140   | 1.750231246  |
| C58 | -7.403250526  | 6.501235283   | 3.247840670  |
| C59 | -8.513683673  | 6.383713135   | 0.974556602  |
| C60 | -9.045074892  | 7.759577996   | 0.698663035  |
| C61 | -9.052177101  | 8.898330139   | 1.479502517  |
| C62 | -10.007638868 | 9.298414795   | -0.478764930 |
| C63 | 8.394338890   | 1.450095924   | 5.115659692  |
| C64 | 9.327934609   | 0.255865913   | 5.163622352  |
| C65 | 7.011637255   | 0.915829653   | 4.667910170  |
| C66 | 5.946067219   | 1.986581929   | 4.647322262  |
| C67 | 5.192199781   | 2.294552981   | 5.794235801  |
| C68 | 5.674989312   | 2.707468714   | 3.471147961  |
| C69 | 4.200613273   | 3.282986682   | 5.768609435  |
| C70 | 4.696188536   | 3.701697383   | 3.431554223  |
| C71 | 3.958122835   | 3.988496853   | 4.582778387  |
| C72 | 5.901355385   | 7.049385146   | -0.361603477 |
| C73 | 4.924529675   | 8.091338835   | -0.920935517 |
| C74 | 5.173382248   | 5.716343806   | -0.125930010 |
| C75 | 4.191611835   | 9.341853480   | -2.904515679 |
| C76 | 2.774229417   | 8.845018685   | -3.198500193 |
| C77 | 1.265882226   | 6.899223684   | -3.352816985 |
| C78 | 0.460888884   | 6.833811402   | -2.038055365 |
| C79 | 1.438216490   | 5.522187487   | -4.015604078 |
| C80 | 0.169689458   | 4.718035301   | -4.318717896 |
| C81 | -0.722204073  | 5.220009190   | -5.469189775 |
| C82 | -2.021734457  | 7.353671399   | -5.332578437 |
| C83 | 0.437221971   | 6.444657820   | 0.369740049  |
| C84 | 0.250611486   | 7.817644151   | 1.043312313  |
| C85 | 1.101270205   | 5.498801918   | 1.377014236  |
| C86 | 1.320754407   | 9.939224634   | 1.612931274  |
| C87 | 0.691361197   | 11.257746390  | 1.172240927  |
| C88 | -0.600601545  | 12.474118460  | -0.532315570 |



|       |              |               |              |
|-------|--------------|---------------|--------------|
| C89   | -1.996980000 | 12.886534711  | -0.015579089 |
| C90   | -0.580160238 | 12.419415357  | -2.076910622 |
| C91   | -1.514488306 | 11.339802944  | -2.613071219 |
| C92   | -4.063249141 | 12.137252903  | 1.092224262  |
| C93   | -4.156471880 | 13.195227559  | 2.184827974  |
| C94   | -4.646698266 | 10.794839210  | 1.610856541  |
| C95   | -4.739232716 | 9.739274093   | 0.530007526  |
| C96   | -5.843529463 | 9.708589587   | -0.335954616 |
| C97   | -3.722466012 | 8.789708768   | 0.340029179  |
| C98   | -5.927644115 | 8.773664695   | -1.370703587 |
| C99   | -3.778240074 | 7.860392345   | -0.704172234 |
| C100  | -4.884818227 | 7.862445542   | -1.552104060 |
| C101  | 5.566567473  | -4.110216504  | -8.089071911 |
| C102  | 4.080447507  | -3.871795080  | -7.878166758 |
| C103  | 2.404346277  | -2.319912515  | -6.896664664 |
| C104  | 2.023935077  | -0.986462951  | -7.553126522 |
| C105  | 2.431160056  | 1.430006502   | -7.547217866 |
| C106  | 3.586004040  | 2.421024597   | -7.429616399 |
| C107  | 5.745418805  | 3.035796108   | -6.461509465 |
| C108  | 6.823635048  | 2.936912603   | -7.524927183 |
| C109  | -1.158015326 | -3.610713986  | -9.436341086 |
| C110  | -2.199079508 | -2.489979263  | -9.318074625 |
| C111  | -0.919642116 | -4.248585615  | -8.049289755 |
| C112  | -0.177647070 | -5.591822089  | -8.171880781 |
| C113  | 0.283893814  | -6.075389041  | -6.815832617 |
| C114  | -2.649606856 | -0.148283001  | -8.772923779 |
| C115  | -2.038712068 | 1.126043462   | -9.324273859 |
| C116  | -3.244236216 | -0.018085157  | -7.348671279 |
| C117  | -2.158796369 | -0.108838429  | -6.311132788 |
| C118  | -1.384393148 | 1.015497580   | -5.987074462 |
| C119  | -1.800751664 | -1.356509780  | -5.770854846 |
| C120  | -0.232286495 | 0.878363489   | -5.207677452 |
| C121  | -0.646750664 | -1.493090039  | -4.993433620 |
| C122  | 0.158811121  | -0.378888425  | -4.741919546 |
| C123  | 8.564126258  | -6.409289742  | -3.172349357 |
| C124  | 9.514215047  | -6.494127245  | -1.966965695 |
| C125  | 7.152503807  | -6.911029641  | -2.825422467 |
| C126  | 6.087054551  | -6.655132322  | -3.847746231 |
| C127  | 5.943339617  | -7.237512212  | -5.090331096 |
| C128  | 4.196269486  | -5.936931544  | -4.679527129 |
| C129  | 10.391528601 | -7.757176997  | -0.082093064 |
| C130  | 11.825616263 | -7.418623841  | -0.423588148 |
| C131  | 0.567215082  | -7.102632711  | 0.035294979  |
| C132  | 1.966896208  | -6.810074838  | 0.498665140  |
| C133  | 3.078547622  | -7.127135248  | -0.583673910 |
| C134  | 2.988977563  | -8.617668942  | -1.016193449 |
| C135  | 4.118617713  | -8.983138162  | -1.992324109 |
| C136  | 4.231535316  | -10.450502201 | -2.284839640 |
| C137  | 4.449192522  | -6.943005899  | 0.138223728  |
| C138  | 3.888462858  | -0.840246340  | -1.505542398 |
| Fe139 | 4.279388225  | -2.103943848  | -2.999478109 |
| Fe140 | 2.397596542  | 0.798664551   | -1.075429987 |
| Fe141 | 5.161400150  | 0.340092570   | -0.510533633 |
| Fe142 | 4.337501011  | 0.451343795   | -2.935445240 |
| Fe143 | 4.295020309  | 2.759156278   | -1.655501270 |
| Fe144 | 4.996668790  | -2.226408525  | -0.568411981 |
| Fe145 | 2.444087119  | -1.954390131  | -0.793409909 |
| H146  | -6.281117716 | -7.139976026  | -0.778834235 |
| H147  | -6.301520201 | -6.249547459  | -2.147429323 |
| H148  | -9.868924935 | -4.509960141  | -0.782842591 |
| H149  | -8.672727150 | -6.022015348  | -2.086723111 |
| H150  | -8.725837137 | -7.122361070  | -0.711951810 |

|      |               |              |               |
|------|---------------|--------------|---------------|
| H151 | -8.319979156  | -2.503624217 | 0.421709423   |
| H152 | -9.878353017  | -5.270790734 | 2.074243676   |
| H153 | -10.081571309 | -2.683608092 | 0.588817907   |
| H154 | -9.797700369  | -5.882936289 | 4.318265382   |
| H155 | -7.323297413  | -5.773421068 | 2.505480404   |
| H156 | -9.533876987  | -4.179463488 | 4.758277539   |
| H157 | -3.402434885  | -2.456857426 | 2.758367596   |
| H158 | -5.818190990  | -3.904770464 | 2.088531293   |
| H159 | -5.156425437  | -6.582397234 | 2.815388575   |
| H160 | -6.064257868  | 0.027262571  | 5.776877692   |
| H161 | -6.780739253  | -2.210564734 | 4.091299251   |
| H162 | -5.341057431  | -6.483784247 | 4.586254268   |
| H163 | -4.854106206  | -1.807089180 | 1.958745398   |
| H164 | -6.296317693  | -3.524713053 | 6.490051074   |
| H165 | -7.489470068  | -1.032114364 | 5.954804284   |
| H166 | -0.911757173  | -3.480300610 | 3.855273494   |
| H167 | -0.641357359  | -2.396637522 | 2.470155381   |
| H168 | 0.704376806   | -2.774074722 | 3.562234408   |
| H169 | -1.842421392  | -1.217095156 | 4.291748377   |
| H170 | -6.003812922  | -4.571212113 | 8.525880695   |
| H171 | -2.694607080  | 1.864752826  | 4.723887207   |
| H172 | -3.474830970  | -0.170730808 | 8.629278712   |
| H173 | -3.587896284  | 3.440466896  | 8.694962051   |
| H174 | -0.232389569  | 0.082589141  | 2.846530789   |
| H175 | 1.019831189   | -0.125057501 | 4.075425047   |
| H176 | 8.290468525   | 1.831326591  | 6.149536783   |
| H177 | -3.574911834  | 3.379282004  | 4.974318248   |
| H178 | -4.109727143  | 4.245712294  | 7.193356007   |
| H179 | -1.822811862  | 3.314995234  | 5.292500998   |
| H180 | -2.399001126  | 4.289646690  | 7.679805294   |
| H181 | -3.969045020  | 1.769350369  | 6.869678728   |
| H182 | -0.960389147  | 2.122323070  | 7.337404234   |
| H183 | -2.470681926  | -0.000572729 | 6.062537098   |
| H184 | -0.452245711  | 0.801924908  | 4.452445093   |
| H185 | 1.326056237   | 4.544200367  | 0.875039513   |
| H186 | 0.366772803   | 5.308631315  | 2.175725217   |
| H187 | 2.475885699   | 5.673176781  | 2.765098949   |
| H188 | 2.486227827   | 5.015262529  | 5.324567222   |
| H189 | 4.478888370   | 4.220433406  | 2.498265783   |
| H190 | 6.207783277   | 2.458667176  | 2.550958938   |
| H191 | 5.367320710   | 1.748313586  | 6.725106170   |
| H192 | -2.318166739  | -2.580669848 | 6.355281370   |
| H193 | -1.850286851  | -5.742414685 | 6.746425352   |
| H194 | -1.655525055  | -5.154101401 | 8.415549860   |
| H195 | -3.796468791  | -4.389871868 | 6.507076118   |
| H196 | -5.629353557  | -3.006214069 | 9.290338994   |
| H197 | 3.609695635   | 3.496382540  | 6.663246312   |
| H198 | 0.577433690   | -1.996970739 | 5.984658734   |
| H199 | -3.662006503  | 0.808958353  | 11.229885257  |
| H200 | -3.661689685  | -0.917298533 | 10.789713362  |
| H201 | -0.938558187  | -0.566120762 | 10.829107431  |
| H202 | 10.130526116  | -7.107460281 | 6.181666891   |
| H203 | -0.995499992  | -5.875545306 | -4.138808097  |
| H204 | 0.732787146   | -8.833888251 | 0.870424335   |
| H205 | -0.858212613  | -6.345141188 | -8.594608280  |
| H206 | 0.683003575   | -5.486825506 | -8.849074538  |
| H207 | -1.880792271  | -4.415531785 | -7.539791478  |
| H208 | -1.292098479  | 0.962366316  | -10.136739029 |
| H209 | -1.661359476  | -4.364172680 | -10.062403430 |
| H210 | -2.986323735  | -2.091919666 | -2.847997015  |
| H211 | -3.750738156  | -4.811627990 | -1.653967545  |
| H212 | -0.743638342  | -1.134997784 | -8.728630278  |

|      |               |              |               |
|------|---------------|--------------|---------------|
| H213 | -3.496416825  | -0.350660853 | -9.460594437  |
| H214 | 0.632815596   | -2.571663760 | -9.588719590  |
| H215 | -0.860718638  | -5.601676506 | -2.405117811  |
| H216 | -0.352490206  | -3.541428901 | -7.425294885  |
| H217 | 0.589156123   | -3.978706700 | -10.448504380 |
| H218 | -6.251075118  | -3.272728095 | -3.972090630  |
| H219 | -3.403992982  | -2.223413376 | -1.128348240  |
| H220 | 2.080636883   | -5.392869855 | -7.244829173  |
| H221 | -2.166036154  | -4.133448680 | -1.303044237  |
| H222 | -4.209185648  | 2.867905467  | 2.272713773   |
| H223 | -3.204827769  | 0.759609623  | 0.841756455   |
| H224 | -8.545400947  | 0.981729616  | 2.341435655   |
| H225 | -7.269005042  | 0.123572124  | -0.220946486  |
| H226 | -7.072751730  | 4.363374874  | 0.857216346   |
| H227 | -8.667173487  | 9.103685284  | 2.472420277   |
| H228 | -7.702609125  | 5.566775422  | 3.781120921   |
| H229 | -9.268166933  | 5.762789903  | 1.490148627   |
| H230 | -6.486959153  | 7.086219226  | 1.395726012   |
| H231 | -10.504154922 | 9.852114095  | -1.271247549  |
| H232 | -3.344359079  | 4.474459558  | 0.579196912   |
| H233 | -4.732837216  | 4.174069839  | -0.469613407  |
| H234 | -9.822220823  | 10.832974632 | 0.984949296   |
| H235 | -8.350511628  | 5.913983533  | -0.008319037  |
| H236 | -6.219550841  | 2.219078174  | 0.216610937   |
| H237 | -7.372338726  | -0.330410619 | 2.213596547   |
| H238 | -9.698354952  | 2.038337786  | -1.934199730  |
| H239 | -1.668070617  | 1.541252613  | -3.024418007  |
| H240 | -9.984579006  | 0.290001327  | -1.879596367  |
| H241 | 9.692635095   | 2.941568953  | 4.580288212   |
| H242 | 8.191082997   | 3.127240689  | 3.961457335   |
| H243 | 2.100598883   | 6.119597883  | -0.981501009  |
| H244 | -0.576851385  | 6.067494669  | 0.175379174   |
| H245 | 2.003617419   | 8.501922399  | 0.224366758   |
| H246 | -3.332705622  | 4.068444468  | -2.757016522  |
| H247 | -5.002593933  | 3.650061523  | -4.071787364  |
| H248 | -4.204176332  | 5.406555425  | -2.878756940  |
| H249 | -4.597399216  | 1.478144255  | -4.854407286  |
| H250 | -6.355784681  | 1.329474234  | -5.094503994  |
| H251 | 0.458355025   | 12.261172136 | -2.403092505  |
| H252 | -0.924639358  | 13.391778813 | -2.452091472  |
| H253 | 0.091349914   | 10.030462035 | -3.007357037  |
| H254 | -1.520346587  | 9.367931652  | -3.165184099  |
| H255 | -1.449107581  | 8.971074096  | -6.447544550  |
| H256 | -1.178191345  | 4.361498861  | -5.983479425  |
| H257 | -6.801316814  | 8.753318352  | -2.027662485  |
| H258 | -2.862078077  | 8.752374120  | 1.014766168   |
| H259 | -3.553487744  | 7.610234727  | -3.979991629  |
| H260 | 2.075071523   | 4.897223469  | -3.369452487  |
| H261 | 3.340213610   | 6.895718680  | -2.830867116  |
| H262 | -0.440517340  | 4.581772812  | -3.411783067  |
| H263 | -7.948577840  | -0.060154289 | -2.907528360  |
| H264 | 4.649660076   | 9.641714661  | -3.857343703  |
| H265 | -5.412652433  | -0.763907460 | -4.046962686  |
| H266 | 1.998659658   | 5.678410092  | -4.953028157  |
| H267 | -2.952351195  | 7.166124291  | -0.869965933  |
| H268 | 4.081912909   | 10.243312157 | -2.286115874  |
| H269 | -0.760441793  | 7.472570918  | -6.955312905  |
| H270 | -3.365258918  | 8.877043484  | -5.134809131  |
| H271 | -4.613889815  | -3.507153905 | -4.213974975  |
| H272 | -5.612783200  | -3.211742438 | -1.742566259  |
| H273 | -6.661689965  | 10.420553357 | -0.199898823  |
| H274 | -4.868984303  | 1.530205427  | -2.417927231  |

|      |              |               |              |
|------|--------------|---------------|--------------|
| H275 | 0.689695055  | 7.569534029   | -4.003779176 |
| H276 | -0.112553289 | 5.742486136   | -6.218139823 |
| H277 | 0.515351304  | 3.712221211   | -4.593445878 |
| H278 | -2.516075749 | 5.623237257   | -4.385492216 |
| H279 | 0.890895510  | 9.706312286   | 2.598863303  |
| H280 | -0.098811617 | 10.377123976  | -0.503769944 |
| H281 | 0.068420368  | 13.284913736  | -0.209936275 |
| H282 | 2.393191856  | 10.135728508  | 1.748300082  |
| H283 | -2.255358133 | 11.025753535  | 0.778067310  |
| H284 | 6.092525382  | -3.147286163  | -8.168194743 |
| H285 | 5.926276937  | -4.596437054  | -7.158904283 |
| H286 | 8.511682371  | -5.340266408  | -3.424649906 |
| H287 | 6.739877059  | -5.271123001  | -9.289773199 |
| H288 | 5.160869612  | -5.707940050  | -9.282072959 |
| H289 | 5.908804951  | 4.978290754   | 0.217685202  |
| H290 | 5.759710417  | 7.772848292   | 1.535432274  |
| H291 | 5.751414987  | 7.881863341   | -2.790631327 |
| H292 | 4.410207567  | 5.855529553   | 0.652813891  |
| H293 | 7.067801565  | 8.332115002   | 0.732956348  |
| H294 | 6.200675458  | 2.852353101   | -5.475241953 |
| H295 | 6.709462857  | 6.882363256   | -1.091173902 |
| H296 | 4.187737971  | -6.672130517  | 5.838086227  |
| H297 | 6.365864822  | -7.832595460  | 4.021136128  |
| H298 | 4.677570896  | 1.235281913   | -6.100000997 |
| H299 | 4.286313843  | 0.141335965   | 3.937685333  |
| H300 | 2.175501038  | 1.353262739   | -8.612270911 |
| H301 | -0.368813119 | -2.466892343  | -4.584017149 |
| H302 | 1.562548880  | 1.902672442   | -7.056059520 |
| H303 | 3.318626317  | -4.277119287  | 4.895884406  |
| H304 | 3.187539058  | -0.074125667  | -6.157653686 |
| H305 | 3.538526483  | -4.857399662  | 3.245450638  |
| H306 | 4.063381732  | -7.052223483  | 4.106492621  |
| H307 | 5.950164579  | -5.316284333  | 3.704732182  |
| H308 | 5.738372505  | -4.811314558  | 5.393160284  |
| H309 | -3.977829140 | -0.825971517  | -7.214691085 |
| H310 | 4.801343866  | -9.116606727  | 6.232853433  |
| H311 | 4.090239354  | -11.704271286 | 4.708824278  |
| H312 | 1.083494868  | -0.473902297  | -4.176453960 |
| H313 | 5.048620929  | -11.329378489 | 7.436888241  |
| H314 | 3.553812185  | -11.727787673 | 6.898080779  |
| H315 | 4.950858677  | -3.039677270  | 2.724169323  |
| H316 | 0.384715542  | 1.742313234   | -4.957352763 |
| H317 | -2.422191766 | -2.231747752  | -5.974229217 |
| H318 | 7.615929719  | -10.011324426 | 0.153492980  |
| H319 | 7.199201311  | -8.000714203  | -2.650255402 |
| H320 | 6.311950817  | -8.295661561  | 1.300400459  |
| H321 | 7.052768054  | -10.767232171 | -1.074066558 |
| H322 | 6.616886297  | 2.208196905   | -8.346156088 |
| H323 | 6.335523039  | -5.175316122  | 0.863885332  |
| H324 | 2.201825643  | -7.365957692  | 1.417936647  |
| H325 | 4.505474393  | -2.145058110  | -6.858578593 |
| H326 | 3.052501904  | -9.253199592  | -0.118661401 |
| H327 | 4.331333724  | -7.033479112  | -6.487623022 |
| H328 | 3.235234460  | -5.451794629  | -4.806868518 |
| H329 | 5.651685574  | -12.216024640 | 5.357422404  |
| H330 | 4.973286588  | -0.801680737  | 2.615954308  |
| H331 | 8.079118080  | -5.906955557  | 2.331966810  |
| H332 | 7.073537895  | -3.831596073  | 1.121884243  |
| H333 | 8.261797455  | -6.849551113  | 4.532064475  |
| H334 | 3.551239087  | -2.602134854  | 6.009000411  |
| H335 | 3.268173529  | -11.926833622 | -2.970577416 |
| H336 | 3.952038154  | -8.443401733  | -2.936913351 |

|       |              |               |              |
|-------|--------------|---------------|--------------|
| H337  | 5.089128992  | -8.666986329  | -1.593414840 |
| H338  | 2.016361500  | -8.790766920  | -1.499057456 |
| H339  | 2.338486179  | -2.244929235  | -5.799399573 |
| H340  | -1.672858257 | 1.990628868   | -6.385843396 |
| H341  | -3.775133680 | 0.944987667   | -7.303221883 |
| H342  | 2.035389991  | -5.732862556  | 0.697247518  |
| H343  | 8.119141101  | -7.459078487  | 2.283076754  |
| H344  | 6.884913373  | -9.338581372  | 2.300345990  |
| H345  | 3.419193323  | -0.913844882  | 5.808901580  |
| H346  | 6.572710056  | -7.939495240  | -5.625976207 |
| H347  | 6.836324197  | -6.454864157  | -1.878042378 |
| H348  | 1.711411945  | -3.084581894  | -7.251516790 |
| H349  | 5.359332996  | 4.067155153   | -6.462874760 |
| H350  | 6.723766296  | 0.110166869   | 5.359840882  |
| H351  | 7.117975944  | 0.472192121   | 3.665093479  |
| H352  | 10.039680787 | -6.716062599  | -4.562661427 |
| H353  | 9.294278480  | -8.095747862  | -4.101091738 |
| H354  | 10.378469589 | -8.809939364  | 0.241226304  |
| H355  | 8.828273133  | -8.385173194  | -1.384316381 |
| H356  | 12.113965797 | -7.604243455  | -1.486040374 |
| H357  | 10.055590895 | -7.140202703  | 0.767392886  |
| H358  | 9.789184174  | -0.005660221  | 4.180693274  |
| H359  | -3.212048041 | 13.366906412  | 2.755726383  |
| H360  | 8.929703250  | -6.820960436  | 7.468510623  |
| H361  | 8.688307946  | -4.403389739  | 6.124073073  |
| H362  | -4.667805619 | 12.487999587  | 0.239997735  |
| H363  | -4.026564580 | 10.435777809  | 2.447958425  |
| H364  | -5.646111574 | 11.007866230  | 2.017622361  |
| H365  | -5.773436006 | 6.977478582   | -3.044098050 |
| H366  | 0.049361276  | -0.567774229  | -0.401619078 |
| H367  | -1.863395659 | -0.143261612  | -1.149739484 |
| Mo368 | 4.217053931  | -4.579392472  | -1.760850306 |
| N369  | 2.069406712  | -0.865770866  | 1.901157102  |
| N370  | 2.213438997  | -1.218600079  | 0.836131579  |
| N371  | -6.843206082 | -6.929953775  | -1.608125911 |
| N372  | -9.118805036 | -4.390924981  | -0.106106238 |
| N373  | -9.406480754 | -4.627421587  | 2.705199273  |
| N374  | -6.963021352 | -5.775972616  | 3.460364896  |
| N375  | -5.109701187 | -3.695962652  | 2.792408999  |
| N376  | -6.051559595 | -1.728601555  | 4.622204919  |
| N377  | -5.811453719 | -2.976405453  | 7.205054256  |
| N378  | -3.287777849 | -4.363860108  | 7.396096407  |
| N379  | -1.308547005 | -2.698444538  | 6.411139061  |
| N380  | -1.738969066 | 0.290584177   | 6.712719281  |
| N381  | -2.879401991 | 0.301845198   | 9.312071241  |
| N382  | 4.356333153  | -11.124799226 | 6.713553859  |
| N383  | 5.336068319  | -9.022034770  | 5.362759934  |
| N384  | 4.511378234  | -3.071649894  | 3.649341035  |
| N385  | 3.500984544  | -1.822072461  | 5.361002898  |
| N386  | 4.535220390  | -0.768051352  | 3.561310958  |
| N387  | 8.119482615  | -6.906921150  | 5.563897763  |
| N388  | -5.328098832 | -2.848275157  | -3.857319330 |
| N389  | -1.356664102 | -5.442365910  | -3.283589776 |
| N390  | -5.603830767 | -0.293549896  | -3.150780860 |
| N391  | -8.044189125 | 0.813013242   | -2.394953778 |
| N392  | -7.968280980 | 0.552839078   | 0.399409609  |
| N393  | -5.906784797 | 2.318190042   | 1.186731714  |
| N394  | -2.802241194 | 2.836602573   | -1.717221545 |
| N395  | -2.298679954 | 0.776063466   | -1.116537100 |
| N396  | -6.619036124 | 4.981528988   | 1.526104159  |
| N397  | -9.646020225 | 8.022633659   | -0.522435834 |
| N398  | -9.665427971 | 9.866696311   | 0.711712136  |

|      |              |               |               |
|------|--------------|---------------|---------------|
| N399 | 8.913538967  | 2.429447784   | 4.159733554   |
| N400 | 6.513346190  | 7.487737850   | 0.901447956   |
| N401 | 5.070540046  | 8.399229364   | -2.240603409  |
| N402 | 2.581297286  | 7.508933911   | -3.172558942  |
| N403 | -1.827779024 | 6.076645537   | -5.025072555  |
| N404 | -1.260110743 | 7.994923560   | -6.244188671  |
| N405 | -2.951850250 | 8.076990593   | -4.663594295  |
| N406 | 1.144420861  | 6.502792719   | -0.907649354  |
| N407 | 1.163810579  | 8.785847962   | 0.738177160   |
| N408 | -0.084600107 | 11.236970712  | 0.047143803   |
| N409 | -0.923286234 | 10.151760444  | -2.901320917  |
| N410 | -2.682925313 | 11.942579012  | 0.673291048   |
| N411 | 5.788105220  | -4.898291675  | -9.306489842  |
| N412 | 3.757503754  | -2.719048712  | -7.263699120  |
| N413 | 2.643688282  | 0.089713097   | -7.033211231  |
| N414 | 4.657928169  | 2.095317132   | -6.662706563  |
| N415 | 0.032330846  | -3.167352349  | -10.172210945 |
| N416 | -1.735193186 | -1.261668519  | -8.958061017  |
| N417 | 9.121539374  | -7.114602609  | -4.343263268  |
| N418 | 4.981764937  | -5.839553366  | -3.612148478  |
| N419 | 4.748449605  | -6.770962044  | -5.598208153  |
| N420 | 9.514102402  | -7.644433760  | -1.236527042  |
| N421 | 0.298479900  | 2.267783554   | 0.339089977   |
| N422 | 1.110805879  | 1.699939900   | -0.210614628  |
| O423 | -7.018872669 | -5.008150471  | 0.521949471   |
| O424 | -8.340710876 | -2.626274065  | 2.932866954   |
| O425 | -7.318695608 | -5.083482866  | 5.610971792   |
| O426 | -3.829149059 | -4.471145305  | 4.507089460   |
| O427 | -3.941940344 | -0.887804129  | 4.662984424   |
| O428 | -5.291444092 | -0.894517159  | 7.993843505   |
| O429 | -3.403576976 | -4.097276351  | 9.672117597   |
| O430 | 0.352333964  | -4.179640286  | 6.997577819   |
| O431 | 0.392038604  | -0.015919296  | 7.464564225   |
| O432 | -1.438222756 | 1.991794765   | 9.787432849   |
| O433 | -1.668859772 | -0.061363579  | 12.666456265  |
| O434 | 6.244805092  | -10.333563805 | 3.687206640   |
| O435 | 6.660713817  | -7.391549142  | 7.272394160   |
| O436 | 10.605831018 | -4.607316476  | 6.791804198   |
| O437 | -5.686903312 | -0.774008744  | -0.905153466  |
| O438 | -3.079425581 | -4.512517085  | -4.439482328  |
| O439 | -6.966367408 | 2.679106373   | -1.648175918  |
| O440 | -5.771617799 | 3.178025744   | -4.491007171  |
| O441 | -9.974625055 | 1.658878423   | 0.571060515   |
| O442 | -6.214045385 | 1.758813223   | 3.381938425   |
| O443 | -4.831272947 | 5.285540391   | 2.908305847   |
| O444 | -7.319481014 | 7.571143085   | 3.827406726   |
| O445 | 9.555731357  | -0.401491739  | 6.169498478   |
| O446 | 2.989446076  | 4.968336391   | 4.490966944   |
| O447 | 4.057231808  | 8.636966479   | -0.213910569  |
| O448 | 1.889415876  | 9.679721320   | -3.480135557  |
| O449 | -0.754150316 | 7.091805167   | -2.042400892  |
| O450 | -0.672384868 | 7.989172567   | 1.851520514   |
| O451 | 2.286036986  | 6.102905519   | 1.906036429   |
| O452 | 0.878440770  | 12.280560525  | 1.843837714   |
| O453 | -2.436929435 | 14.026067440  | -0.222463953  |
| O454 | -2.739660632 | 11.524340811  | -2.692718770  |
| O455 | -5.188625097 | 13.789694417  | 2.450984045   |
| O456 | -4.896811270 | 6.946547067   | -2.613883943  |
| O457 | 3.240564038  | -4.737010099  | -8.236580246  |
| O458 | 1.222558421  | -0.932721078  | -8.512686607  |
| O459 | 3.487889429  | 3.508719342   | -8.023485035  |
| O460 | 7.850333380  | 3.596386511   | -7.500419061  |

|                 |                           |              |               |               |              |
|-----------------|---------------------------|--------------|---------------|---------------|--------------|
|                 | O461                      | -3.405710053 | -2.709226849  | -9.522154613  |              |
|                 | O462                      | -0.460257164 | -6.611287265  | -5.999723199  |              |
|                 | O463                      | 1.574386215  | -5.848273985  | -6.501080805  |              |
|                 | O464                      | -2.355650243 | 2.253523537   | -8.974975011  |              |
|                 | O465                      | 10.319947300 | -5.580657913  | -1.707349702  |              |
|                 | O466                      | 12.646974241 | -7.050305950  | 0.404712224   |              |
|                 | O467                      | -0.151877717 | -6.344352817  | -0.598974743  |              |
|                 | O468                      | 0.066114738  | -8.342591989  | 0.352956212   |              |
|                 | O469                      | 5.227855118  | -11.143648814 | -2.087434325  |              |
|                 | O470                      | 3.095151706  | -10.973594038 | -2.816996302  |              |
|                 | O471                      | 5.217976936  | -6.021566145  | -0.346541689  |              |
|                 | O472                      | 4.758885600  | -7.697764889  | 1.090333376   |              |
|                 | O473                      | 2.968320999  | -6.284233115  | -1.665586565  |              |
|                 | O474                      | 8.536060831  | -6.682534635  | 2.743646056   |              |
|                 | O475                      | 6.915647882  | -4.711212185  | 1.518474016   |              |
|                 | O476                      | -3.769461303 | 4.711037007   | -3.419164890  |              |
|                 | O477                      | 7.892105103  | -10.591558671 | -0.600468566  |              |
|                 | O478                      | 7.159594736  | -8.783397216  | 1.527303155   |              |
|                 | S479                      | 4.336716719  | 5.078915467   | -1.648508913  |              |
|                 | S480                      | 2.680416673  | 1.933380620   | -2.991681479  |              |
|                 | S481                      | 2.421441677  | -3.356695790  | -2.773732085  |              |
|                 | S482                      | 3.822466164  | 1.908089983   | 0.427867264   |              |
|                 | S483                      | 0.669940663  | -0.816045756  | -1.590198888  |              |
|                 | S484                      | 4.724456257  | -0.784295564  | -4.754830093  |              |
|                 | S485                      | 3.485983310  | -3.629832704  | 0.319608504   |              |
|                 | S486                      | 6.149145442  | 1.548565383   | -2.218184560  |              |
|                 | S487                      | 6.107377385  | -3.209601504  | -2.230715640  |              |
|                 | S488                      | 6.271987650  | -1.085481925  | 0.820012639   |              |
| <b>9, 35(1)</b> | bm12unh2b2n2x2n2n35.car_2 |              |               |               |              |
| Fe1             | 3.17                      | C1           | -7.520069299  | -5.684869056  | 1.201273694  |
| Fe2             | 0.40                      | C2           | -7.677852876  | -6.897231628  | 0.278507195  |
| Fe3             | -2.57                     | C3           | -8.625114759  | -3.767031397  | 2.266388633  |
| Fe4             | 2.90                      | C4           | -8.167629168  | -3.979513101  | 3.707285871  |
| Fe5             | -2.42                     | C5           | -8.036548791  | -5.479823514  | 5.630334503  |
| Fe6             | -2.56                     | C6           | -6.514946318  | -5.615813393  | 5.764169727  |
| Fe7             | 2.42                      | C7           | -4.409242914  | -6.159614756  | 4.637779006  |
|                 |                           | C8           | -3.741790845  | -4.786625243  | 4.507486793  |
|                 |                           | C9           | -3.805461620  | -2.558052449  | 3.514432058  |
|                 |                           | C10          | -3.941839535  | -1.734710355  | 4.804454056  |
|                 |                           | C11          | -5.256281019  | -1.205652701  | 6.773534279  |
|                 |                           | C12          | -4.393212046  | -1.729332807  | 7.930180892  |
|                 |                           | C13          | -3.727327238  | -3.680365199  | 9.251461617  |
|                 |                           | C14          | -2.223931290  | -3.972732052  | 9.162047605  |
|                 |                           | C15          | -0.351718380  | -4.674051610  | 7.727371847  |
|                 |                           | C16          | 0.561320391   | -3.659859695  | 7.029850797  |
|                 |                           | C17          | 0.638515845   | -1.463518932  | 5.859686283  |
|                 |                           | C18          | 0.590012138   | -0.183678540  | 6.712108781  |
|                 |                           | C19          | 0.102946125   | -1.266919104  | 4.423057204  |
|                 |                           | C20          | 0.633867756   | 0.035217180   | 3.815200842  |
|                 |                           | C21          | 0.430932156   | -2.491216804  | 3.562259950  |
|                 |                           | C22          | -0.760417320  | 1.686194807   | 7.554880499  |
|                 |                           | C23          | -0.635856317  | 1.490075456   | 9.076062177  |
|                 |                           | C24          | -2.064121334  | 2.415771441   | 7.146400044  |
|                 |                           | C25          | -2.274790511  | 3.686019394   | 7.979143386  |
|                 |                           | C26          | -2.052009911  | 2.758951644   | 5.650680340  |
|                 |                           | C27          | -1.294839397  | 0.215544046   | 11.031640672 |
|                 |                           | C28          | 0.116770276   | 0.085225469   | 11.567626492 |
|                 |                           | C29          | 6.502562338   | -10.784007805 | 4.791596335  |
|                 |                           | C30          | 6.974413536   | -9.546384375  | 4.028428733  |
|                 |                           | C31          | 7.095567819   | -7.052700140  | 4.179408057  |
|                 |                           | C32          | 8.253286212   | -6.536324896  | 5.056327577  |

|     |               |              |              |
|-----|---------------|--------------|--------------|
| C33 | 5.873211447   | -6.119618130 | 4.220684873  |
| C34 | 6.173974078   | -4.690522891 | 3.760669135  |
| C35 | 4.884915167   | -3.912558610 | 3.485751335  |
| C36 | 4.817780591   | -1.410284256 | 3.570437842  |
| C37 | 10.525802622  | -5.617983846 | 5.054990475  |
| C38 | 10.739157689  | -4.124277497 | 4.927705205  |
| C39 | -5.159220669  | -2.953048734 | -1.509149926 |
| C40 | -5.632044626  | -1.532061686 | -1.147695277 |
| C41 | -3.618624008  | -2.976302966 | -1.447408661 |
| C42 | -2.967489915  | -4.374649556 | -1.432410021 |
| C43 | -2.647947036  | -4.961444762 | -2.804256982 |
| C44 | -6.316168100  | 0.630247441  | -2.161997749 |
| C45 | -7.563161294  | 0.995621268  | -1.355362155 |
| C46 | -6.316121321  | 1.200684954  | -3.614966547 |
| C47 | -9.518842735  | 0.149569218  | -0.155050071 |
| C48 | -9.087542880  | 0.368103524  | 1.304506374  |
| C49 | -7.278547835  | 0.221272403  | 2.965078497  |
| C50 | -6.221747417  | 1.310745082  | 3.158038696  |
| C51 | -4.745002580  | 2.992427742  | 2.146281891  |
| C52 | -5.296421000  | 4.304919849  | 2.742650255  |
| C53 | -4.154940572  | 3.345997169  | 0.770214175  |
| C54 | -3.460018771  | 2.256406142  | 0.004378541  |
| C55 | -2.787003341  | 1.118101216  | 0.405124722  |
| C56 | -2.654713434  | 1.332398106  | -1.790357712 |
| C57 | -7.236087267  | 5.841541729  | 2.745385336  |
| C58 | -7.250874708  | 6.079054475  | 4.251841482  |
| C59 | -8.675891796  | 5.796146546  | 2.181252771  |
| C60 | -9.334861237  | 7.123961024  | 1.943059705  |
| C61 | -9.339799046  | 8.280190915  | 2.699547526  |
| C62 | -10.546807216 | 8.553108586  | 0.861091929  |
| C63 | 8.921800215   | 2.141080397  | 3.717644826  |
| C64 | 9.925304486   | 1.005131322  | 3.654025633  |
| C65 | 7.521281013   | 1.514377117  | 3.502062148  |
| C66 | 6.404186046   | 2.523447709  | 3.624222468  |
| C67 | 5.785630171   | 2.781522537  | 4.861770080  |
| C68 | 5.951996642   | 3.238444909  | 2.500434406  |
| C69 | 4.749537028   | 3.715253758  | 4.976996590  |
| C70 | 4.930456644   | 4.182249826  | 2.602391854  |
| C71 | 4.324757510   | 4.415514125  | 3.840456785  |
| C72 | 5.251997946   | 7.422036897  | -1.468633816 |
| C73 | 4.120796129   | 8.361912940  | -1.905486553 |
| C74 | 4.676961135   | 6.038710659  | -1.126270704 |
| C75 | 2.997570210   | 9.469972498  | -3.787241847 |
| C76 | 1.592366552   | 8.866329190  | -3.833928245 |
| C77 | 0.220966783   | 6.820077872  | -3.683921101 |
| C78 | -0.358136302  | 6.749394289  | -2.255482632 |
| C79 | 0.381647219   | 5.436879633  | -4.338789191 |
| C80 | -0.867627869  | 4.553572207  | -4.438267856 |
| C81 | -1.957340401  | 4.997728017  | -5.431236255 |
| C82 | -3.372084057  | 7.029933163  | -5.120527772 |
| C83 | 0.016411275   | 6.436472039  | 0.134492556  |
| C84 | -0.157322279  | 7.816657613  | 0.797772003  |
| C85 | 0.887861154   | 5.566865257  | 1.046329429  |
| C86 | 0.841285515   | 10.022568747 | 1.138093557  |
| C87 | 0.069619330   | 11.288778391 | 0.773067252  |
| C88 | -1.573791295  | 12.364451209 | -0.710753744 |
| C89 | -2.894133302  | 12.699981297 | 0.015693076  |
| C90 | -1.798000055  | 12.265343858 | -2.237617662 |
| C91 | -2.704913961  | 11.093184057 | -2.595506537 |
| C92 | -4.687968105  | 11.878688541 | 1.478698940  |
| C93 | -4.657637660  | 12.943401983 | 2.569622915  |
| C94 | -5.125001194  | 10.518563728 | 2.088020520  |



|       |              |               |              |
|-------|--------------|---------------|--------------|
| C95   | -5.291892743 | 9.432249789   | 1.048256510  |
| C96   | -6.481525551 | 9.330661643   | 0.309007765  |
| C97   | -4.259393697 | 8.519743903   | 0.770264737  |
| C98   | -6.641421459 | 8.357459545   | -0.679850506 |
| C99   | -4.394037816 | 7.551106345   | -0.228763985 |
| C100  | -5.586877834 | 7.480653954   | -0.947643062 |
| C101  | 4.510615968  | -4.005026367  | -8.810677266 |
| C102  | 3.073012877  | -3.853040296  | -8.342469514 |
| C103  | 1.483555588  | -2.385459150  | -7.124716731 |
| C104  | 0.905038835  | -1.086087669  | -7.691087562 |
| C105  | 1.098187170  | 1.355313187   | -7.705127884 |
| C106  | 2.173607899  | 2.424847196   | -7.864000539 |
| C107  | 4.449711202  | 3.204041168   | -7.435711543 |
| C108  | 5.321263821  | 3.171013669   | -8.673533622 |
| C109  | -2.345707548 | -3.997911146  | -9.088384242 |
| C110  | -3.445012900 | -2.952416483  | -8.858285243 |
| C111  | -1.860101966 | -4.561989971  | -7.733607096 |
| C112  | -1.048943478 | -5.856677630  | -7.928841339 |
| C113  | -0.364429184 | -6.266116864  | -6.643959618 |
| C114  | -3.983215193 | -0.636057293  | -8.264841498 |
| C115  | -3.569566222 | 0.649926990   | -8.953677017 |
| C116  | -4.304718974 | -0.489191098  | -6.757440623 |
| C117  | -3.069595418 | -0.488257269  | -5.892297174 |
| C118  | -2.326524216 | 0.685823739   | -5.677717169 |
| C119  | -2.598280494 | -1.688766891  | -5.335043857 |
| C120  | -1.134672079 | 0.646963583   | -4.946081935 |
| C121  | -1.403747979 | -1.727372498  | -4.608209902 |
| C122  | -0.659434297 | -0.557816302  | -4.422033456 |
| C123  | 8.381296733  | -5.872467979  | -4.246010858 |
| C124  | 9.537828191  | -5.850680687  | -3.233169279 |
| C125  | 7.077838748  | -6.413315939  | -3.637126058 |
| C126  | 5.860713723  | -6.317756383  | -4.506469104 |
| C127  | 5.632472730  | -6.960586825  | -5.706881513 |
| C128  | 3.801065812  | -5.880296182  | -5.087416795 |
| C129  | 10.811595279 | -6.969681473  | -1.487341957 |
| C130  | 12.145524765 | -6.697694658  | -2.148162513 |
| C131  | 0.982006104  | -7.118658127  | 0.180931447  |
| C132  | 2.387512882  | -6.620280710  | 0.377709399  |
| C133  | 3.313863018  | -6.834451634  | -0.885798565 |
| C134  | 3.283519025  | -8.329571813  | -1.309446171 |
| C135  | 4.298647027  | -8.647431601  | -2.420423589 |
| C136  | 4.504675527  | -10.117858189 | -2.649988894 |
| C137  | 4.769923668  | -6.524923412  | -0.417337136 |
| C138  | 3.668071552  | -0.589855014  | -2.141470146 |
| Fe139 | 4.025532250  | -1.911453747  | -3.672922170 |
| Fe140 | 2.356181103  | 0.806348787   | -1.278052934 |
| Fe141 | 5.062111462  | 0.686430353   | -1.320112669 |
| Fe142 | 4.005242335  | 0.640915023   | -3.675491418 |
| Fe143 | 4.029673217  | 2.969505713   | -2.290209079 |
| Fe144 | 4.898357987  | -1.867736715  | -1.244046004 |
| Fe145 | 2.339414998  | -2.120191485  | -1.757938732 |
| H146  | -5.745183582 | -7.527513820  | 0.425503423  |
| H147  | -6.065631162 | -6.733753177  | -0.964741203 |
| H148  | -9.498250339 | -5.189637200  | 0.930001948  |
| H149  | -8.394575436 | -6.660561217  | -0.522899265 |
| H150  | -8.151163769 | -7.686862488  | 0.889027916  |
| H151  | -7.944788531 | -3.021566284  | 1.830401688  |
| H152  | -9.007591409 | -5.854229862  | 3.745061650  |
| H153  | -9.635896949 | -3.337448203  | 2.280084123  |
| H154  | -8.503528181 | -6.424281021  | 5.940763081  |
| H155  | -6.367214627 | -6.180845854  | 3.795453881  |
| H156  | -8.350267005 | -4.694665345  | 6.330758847  |

|      |              |              |               |
|------|--------------|--------------|---------------|
| H157 | -2.737501322 | -2.567346153 | 3.257883934   |
| H158 | -5.098237223 | -4.217824638 | 3.055816478   |
| H159 | -4.109700390 | -6.789961037 | 3.788997860   |
| H160 | -5.005138763 | -0.147061678 | 6.630363177   |
| H161 | -5.831270990 | -2.506708829 | 5.157390158   |
| H162 | -4.029603315 | -6.615198467 | 5.560341546   |
| H163 | -4.349720915 | -2.062328745 | 2.697737841   |
| H164 | -4.923798596 | -3.680412760 | 7.483316312   |
| H165 | -6.313736673 | -1.280194259 | 7.063145612   |
| H166 | 0.036403230  | -3.413104547 | 4.015859841   |
| H167 | -0.015645926 | -2.385540174 | 2.561935409   |
| H168 | 1.516586967  | -2.602190583 | 3.425039408   |
| H169 | -0.993377718 | -1.185890921 | 4.490941598   |
| H170 | -4.233089038 | -4.634890871 | 9.457069199   |
| H171 | -2.000271830 | 1.865142662  | 5.013120576   |
| H172 | -1.982773572 | -0.092164165 | 9.038169800   |
| H173 | -2.346212535 | 3.476465524  | 9.055774655   |
| H174 | 0.245925594  | 0.159949004  | 2.795243643   |
| H175 | 1.730935284  | 0.029618583  | 3.750538612   |
| H176 | 8.951363487  | 2.558015300  | 4.742645846   |
| H177 | -2.967950718 | 3.303060298  | 5.379447458   |
| H178 | -3.204861868 | 4.182315443  | 7.664951281   |
| H179 | -1.190486862 | 3.403363903  | 5.410892264   |
| H180 | -1.443603484 | 4.393227681  | 7.827203060   |
| H181 | -2.906971342 | 1.728870989  | 7.343901803   |
| H182 | 0.100682594  | 2.317100369  | 7.282283903   |
| H183 | -1.434495631 | 0.051825765  | 6.327560009   |
| H184 | 0.326234157  | 0.913578320  | 4.400159111   |
| H185 | 1.074008972  | 4.602965850  | 0.543664588   |
| H186 | 0.305507984  | 5.377496180  | 1.962284655   |
| H187 | 2.446935503  | 5.888266946  | 2.196860642   |
| H188 | 2.912527047  | 5.369803748  | 4.770367056   |
| H189 | 4.571706706  | 4.706049904  | 1.715865842   |
| H190 | 6.379458940  | 3.029044827  | 1.517101816   |
| H191 | 6.109742693  | 2.237871171  | 5.753660903   |
| H192 | -1.060768992 | -2.482154276 | 6.673500440   |
| H193 | -0.316235170 | -5.601435177 | 7.137276721   |
| H194 | 0.090474761  | -4.879112864 | 8.711511027   |
| H195 | -2.368311589 | -4.359208560 | 7.125381489   |
| H196 | -3.863701393 | -3.023667225 | 10.120261054  |
| H197 | 4.266275819  | 3.887316393  | 5.942533353   |
| H198 | 1.697288810  | -1.752493201 | 5.826404247   |
| H199 | -1.816529441 | 1.001894512  | 11.602945114  |
| H200 | -1.805879404 | -0.740625455 | 11.226849737  |
| H201 | 0.874220695  | -0.263735151 | 10.826392162  |
| H202 | 11.424584332 | -6.145242070 | 4.701699848   |
| H203 | -1.226570011 | -6.057888846 | -3.793812604  |
| H204 | 1.527658855  | -8.755257202 | 1.044892263   |
| H205 | -1.728829763 | -6.667878791 | -8.228214136  |
| H206 | -0.305777141 | -5.718266832 | -8.727445264  |
| H207 | -2.718570709 | -4.771639653 | -7.076931051  |
| H208 | -2.997173704 | 0.495818438  | -9.900125335  |
| H209 | -2.867276781 | -4.810324788 | -9.617057843  |
| H210 | -3.223468344 | -2.385202457 | -2.288255349  |
| H211 | -3.626561142 | -5.097466257 | -0.918355487  |
| H212 | -2.028018667 | -1.491145747 | -8.462347727  |
| H213 | -4.920497332 | -0.932427400 | -8.777222471  |
| H214 | -0.683548321 | -2.829674754 | -9.515777345  |
| H215 | -0.827140541 | -5.688222860 | -2.119336019  |
| H216 | -1.255257901 | -3.795876885 | -7.224533225  |
| H217 | -0.726047138 | -4.266049935 | -10.321256637 |
| H218 | -6.532025282 | -3.867059418 | -2.757488653  |

|      |               |              |              |
|------|---------------|--------------|--------------|
| H219 | -3.317623282  | -2.456660633 | -0.526731448 |
| H220 | 1.303389557   | -5.478789180 | -7.340969957 |
| H221 | -2.040610078  | -4.322802017 | -0.844830410 |
| H222 | -3.955287651  | 2.657193124  | 2.832423652  |
| H223 | -2.621951460  | 0.675347403  | 1.383452451  |
| H224 | -8.119069786  | 0.470762998  | 3.626843217  |
| H225 | -7.173809039  | -0.356332973 | 0.911115698  |
| H226 | -7.148670080  | 3.829686218  | 2.004672025  |
| H227 | -8.858955480  | 8.545960809  | 3.634727809  |
| H228 | -7.395598375  | 5.147087513  | 4.852003468  |
| H229 | -9.299608085  | 5.155080675  | 2.829998860  |
| H230 | -6.668161883  | 6.655191542  | 2.266977946  |
| H231 | -11.178127809 | 9.043221862  | 0.124031218  |
| H232 | -3.450357736  | 4.178249001  | 0.935443121  |
| H233 | -4.963865183  | 3.741091780  | 0.133623796  |
| H234 | -10.312809596 | 10.135223368 | 2.266276395  |
| H235 | -8.631097094  | 5.291799640  | 1.203308948  |
| H236 | -6.084195086  | 1.655185894  | 1.126321344  |
| H237 | -6.847598513  | -0.720771950 | 3.336652587  |
| H238 | -10.145022778 | 1.011760750  | -0.421879126 |
| H239 | -2.376168259  | 1.113990205  | -2.816133576 |
| H240 | -10.153591865 | -0.746603298 | -0.187102153 |
| H241 | 10.036878180  | 3.672928743  | 2.939627118  |
| H242 | 8.448768309   | 3.766369351  | 2.565890028  |
| H243 | 1.467455440   | 6.175354579  | -1.453208215 |
| H244 | -0.986620735  | 5.987344125  | 0.109745267  |
| H245 | 1.383025423   | 8.591484219  | -0.317824407 |
| H246 | -4.073669683  | 3.664228136  | -2.343793915 |
| H247 | -5.799510320  | 3.113780388  | -3.382329274 |
| H248 | -4.990255151  | 4.977621687  | -2.302683421 |
| H249 | -5.335579106  | 0.930288478  | -4.051173072 |
| H250 | -7.095115656  | 0.682560791  | -4.201090726 |
| H251 | -0.815391163  | 12.183923570 | -2.725629135 |
| H252 | -2.280563176  | 13.195439452 | -2.565348700 |
| H253 | -1.074254935  | 9.899655164  | -3.196873542 |
| H254 | -2.623158822  | 9.103446705  | -3.069094980 |
| H255 | -3.111321897  | 8.635632293  | -6.366203693 |
| H256 | -2.425691835  | 4.115207719  | -5.891219761 |
| H257 | -7.579093106  | 8.286720724  | -1.237842978 |
| H258 | -3.326093911  | 8.544616584  | 1.341205377  |
| H259 | -4.657736668  | 7.245790269  | -3.524908350 |
| H260 | 1.145105420   | 4.865926271  | -3.785303105 |
| H261 | 2.350241494   | 6.972410512  | -3.518062322 |
| H262 | -1.315632831  | 4.383949060  | -3.446824154 |
| H263 | -8.236659045  | -0.933276792 | -1.492235809 |
| H264 | 3.275637570   | 9.753093325  | -4.811864623 |
| H265 | -6.030649268  | -1.343500381 | -3.090292747 |
| H266 | 0.787758873   | 5.604714663  | -5.350747203 |
| H267 | -3.566707921  | 6.878825209  | -0.465296945 |
| H268 | 2.918370604   | 10.390100599 | -3.192790461 |
| H269 | -2.436402843  | 7.164580194  | -6.949972420 |
| H270 | -4.749219684  | 8.488451081  | -4.727416650 |
| H271 | -4.952065716  | -3.949658362 | -3.298321140 |
| H272 | -5.533230098  | -3.600507207 | -0.691919524 |
| H273 | -7.304945353  | 10.021789983 | 0.508225272  |
| H274 | -5.491787154  | 1.113455387  | -1.618686983 |
| H275 | -0.497011104  | 7.431421259  | -4.247339944 |
| H276 | -1.500808557  | 5.565889229  | -6.251234243 |
| H277 | -0.505831809  | 3.572392849  | -4.773008391 |
| H278 | -3.575207892  | 5.296974326  | -4.061898931 |
| H279 | 0.584721947   | 9.796526725  | 2.184347984  |
| H280 | -0.946311559  | 10.301150141 | -0.712333434 |

|      |              |               |               |
|------|--------------|---------------|---------------|
| H281 | -0.917346360 | 13.225454282  | -0.518692576  |
| H282 | 1.907543557  | 10.284799517  | 1.102346568   |
| H283 | -2.875753642 | 10.870379908  | 0.921921910   |
| H284 | 4.960473529  | -3.015632420  | -8.978901675  |
| H285 | 5.056879199  | -4.466542511  | -7.961754810  |
| H286 | 8.227305393  | -4.821326100  | -4.531669382  |
| H287 | 5.523167057  | -5.087335255  | -10.211458189 |
| H288 | 4.010698694  | -5.641868547  | -9.909106445  |
| H289 | 5.513178030  | 5.390348330   | -0.833844273  |
| H290 | 5.296428064  | 8.188703545   | 0.417211633   |
| H291 | 4.669048224  | 8.136240151   | -3.872757824  |
| H292 | 3.984910724  | 6.132421131   | -0.275845655  |
| H293 | 6.447071796  | 8.815918273   | -0.557748550  |
| H294 | 5.087496176  | 3.111495191   | -6.542920394  |
| H295 | 5.968404751  | 7.303097827   | -2.296905816  |
| H296 | 5.461421758  | -6.114081320  | 5.243765450   |
| H297 | 7.435311489  | -7.157771724  | 3.142165177   |
| H298 | 3.645140278  | 1.310189251   | -6.892943315  |
| H299 | 4.828816108  | 0.623576928   | 3.336588462   |
| H300 | 0.605956477  | 1.238647349   | -8.679554937  |
| H301 | -1.055831050 | -2.669715834  | -4.178726640  |
| H302 | 0.343088982  | 1.778580382   | -7.022292959  |
| H303 | 4.254885238  | -3.847430668  | 4.383724170   |
| H304 | 2.206097678  | -0.067602977  | -6.491855527  |
| H305 | 4.286348474  | -4.438908642  | 2.725225460   |
| H306 | 5.111930316  | -6.571015957  | 3.563678783   |
| H307 | 6.761467236  | -4.706026139  | 2.830218647   |
| H308 | 6.774598889  | -4.159419591  | 4.517571254   |
| H309 | -4.956410706 | -1.328238871  | -6.472930416  |
| H310 | 6.308742585  | -8.483564784  | 5.584549696   |
| H311 | 5.626318397  | -11.162728527 | 4.243393310   |
| H312 | 0.271306241  | -0.569550895  | -3.851781435  |
| H313 | 6.928743911  | -10.612269830 | 6.798368396   |
| H314 | 5.424237078  | -11.183186598 | 6.497565429   |
| H315 | 5.418028558  | -2.495326070  | 1.986991061   |
| H316 | -0.554517793 | 1.553068307   | -4.765019518  |
| H317 | -3.177701785 | -2.606428828  | -5.458663702  |
| H318 | 8.228100640  | -9.439523938  | -0.782274637  |
| H319 | 7.225608836  | -7.477161921  | -3.375914803  |
| H320 | 6.957481094  | -7.782601684  | 0.477311069   |
| H321 | 7.552761807  | -10.244202271 | -1.911881285  |
| H322 | 4.992113479  | 2.461878720   | -9.471000818  |
| H323 | 6.670956142  | -4.692176070  | -0.048509459  |
| H324 | 2.858235194  | -7.100268681  | 1.249078161   |
| H325 | 3.543027194  | -2.065878558  | -7.455391318  |
| H326 | 3.510273932  | -8.943662488  | -0.423809440  |
| H327 | 3.833604983  | -7.008112037  | -6.873719100  |
| H328 | 2.778839755  | -5.525578186  | -5.099418098  |
| H329 | 7.298231557  | -11.540034225 | 4.676178510   |
| H330 | 5.168607788  | -0.296380273  | 1.876126347   |
| H331 | 8.704874185  | -5.250344467  | 1.145423669   |
| H332 | 7.369792473  | -3.310005525  | 0.050333896   |
| H333 | 9.315075374  | -6.072020268  | 3.328426705   |
| H334 | 4.671731895  | -2.143595640  | 5.488056820   |
| H335 | 3.597259659  | -11.709294635 | -3.121454818  |
| H336 | 3.957093442  | -8.187022381  | -3.359516139  |
| H337 | 5.282933236  | -8.230229862  | -2.180602072  |
| H338 | 2.269620309  | -8.576906469  | -1.654822292  |
| H339 | 1.600104952  | -2.318263737  | -6.031632846  |
| H340 | -2.686147153 | 1.629524949   | -6.096162711  |
| H341 | -4.877829930 | 0.442331730   | -6.635212728  |
| H342 | 2.344555024  | -5.535455001  | 0.543314335   |

|       |               |               |              |
|-------|---------------|---------------|--------------|
| H343  | 8.862908163   | -6.793338960  | 1.142979363  |
| H344  | 7.760169803   | -8.730991936  | 1.424731598  |
| H345  | 4.245513376   | -0.490023171  | 5.307843690  |
| H346  | 6.274914818   | -7.586292068  | -6.314060475 |
| H347  | 6.877469366   | -5.887719328  | -2.695689818 |
| H348  | 0.792369697   | -3.196586008  | -7.362593101 |
| H349  | 3.963085711   | 4.192287429   | -7.398657266 |
| H350  | 7.395318690   | 0.717785080   | 4.250515767  |
| H351  | 7.500544343   | 1.044697839   | 2.505572208  |
| H352  | 9.587859557   | -6.168396960  | -5.878680590 |
| H353  | 9.049794743   | -7.562901224  | -5.213949758 |
| H354  | 10.861624272  | -7.985655607  | -1.063524939 |
| H355  | 9.059495593   | -7.726865461  | -2.434035837 |
| H356  | 12.191099104  | -6.949279098  | -3.235185306 |
| H357  | 10.657776592  | -6.268852709  | -0.651090075 |
| H358  | 10.249602578  | 0.739537323   | 2.618632948  |
| H359  | -3.646561003  | 13.163368124  | 2.987329600  |
| H360  | 10.399933813  | -5.836875114  | 6.129228065  |
| H361  | 9.812953348   | -3.523464768  | 4.752916599  |
| H362  | -5.430921912  | 12.195916997  | 0.729376544  |
| H363  | -4.383550975  | 10.210915245  | 2.841685999  |
| H364  | -6.072461304  | 10.692212675  | 2.618597746  |
| H365  | -6.605573990  | 6.476836703   | -2.274734759 |
| H366  | 0.260331256   | -1.898017385  | 0.127557219  |
| H367  | -1.656132706  | -0.264734557  | -0.823932701 |
| Mo368 | 4.007751179   | -4.249173165  | -2.277722299 |
| N369  | 2.237789341   | -0.619984713  | 1.302378827  |
| N370  | 2.277547533   | -0.124512354  | 0.290641887  |
| N371  | -6.451791802  | -7.414784752  | -0.306447704 |
| N372  | -8.656280515  | -4.980040882  | 1.460468289  |
| N373  | -8.481839496  | -5.167985130  | 4.280991582  |
| N374  | -5.862758189  | -6.100623894  | 4.678411204  |
| N375  | -4.317464533  | -3.915958319  | 3.640537070  |
| N376  | -5.070182442  | -1.933331314  | 5.528942209  |
| N377  | -4.356196575  | -3.079256345  | 8.086245175  |
| N378  | -1.733823695  | -4.269702325  | 7.925957684  |
| N379  | -0.051972777  | -2.547799792  | 6.553810389  |
| N380  | -0.630569863  | 0.412672517   | 6.844608689  |
| N381  | -1.322439662  | 0.445454461   | 9.602516157  |
| N382  | 6.120476600   | -10.506917289 | 6.180922567  |
| N383  | 6.718418586   | -8.379882405  | 4.650055421  |
| N384  | 5.139300597   | -2.564728140  | 2.971022322  |
| N385  | 4.412862591   | -1.387291192  | 4.862926345  |
| N386  | 4.840056140   | -0.276353581  | 2.863749099  |
| N387  | 9.334824351   | -6.088011794  | 4.370822288  |
| N388  | -5.656073333  | -3.345393131  | -2.835827342 |
| N389  | -1.486406763  | -5.638493089  | -2.896788773 |
| N390  | -6.048076686  | -0.803067087  | -2.212419907 |
| N391  | -8.444335225  | -0.014314302  | -1.111858117 |
| N392  | -7.802831333  | 0.041271332   | 1.622890035  |
| N393  | -5.764720935  | 1.953753314   | 2.045925489  |
| N394  | -3.369666180  | 2.376548690   | -1.375842030 |
| N395  | -2.297603680  | 0.542703092   | -0.749021612 |
| N396  | -6.604085427  | 4.555374502   | 2.465277890  |
| N397  | -10.093720665 | 7.307468644   | 0.798670271  |
| N398  | -10.112508945 | 9.177543136   | 1.992042058  |
| N399  | 9.228692686   | 3.110085062   | 2.663241822  |
| N400  | 5.982616646   | 7.939442248   | -0.302798008 |
| N401  | 4.037547011   | 8.621230658   | -3.240081331 |
| N402  | 1.502085838   | 7.523134031   | -3.729370816 |
| N403  | -3.035024850  | 5.781422288   | -4.814493795 |
| N404  | -2.822698041  | 7.682834431   | -6.168966297 |

|      |              |              |               |
|------|--------------|--------------|---------------|
| N405 | -4.225795135 | 7.715245841  | -4.325396745  |
| N406 | 0.513482267  | 6.495079039  | -1.238772262  |
| N407 | 0.624165915  | 8.832479673  | 0.327028822   |
| N408 | -0.886446443 | 11.181145262 | -0.196980027  |
| N409 | -2.061924556 | 9.940994666  | -2.918211652  |
| N410 | -3.384460352 | 11.747702035 | 0.845912483   |
| N411 | 4.558767372  | -4.788180435 | -10.050155128 |
| N412 | 2.776106266  | -2.694652910 | -7.724229788  |
| N413 | 1.512004881  | 0.038162160  | -7.255559892  |
| N414 | 3.430065896  | 2.168563129  | -7.415887544  |
| N415 | -1.307184544 | -3.490583322 | -9.995533364  |
| N416 | -3.027855079 | -1.687955740 | -8.573500758  |
| N417 | 8.762956418  | -6.611628037 | -5.464792906  |
| N418 | 4.701432253  | -5.635249149 | -4.139210168  |
| N419 | 4.329549812  | -6.671541754 | -6.053055328  |
| N420 | 9.711612565  | -6.942715426 | -2.438003523  |
| N421 | 0.030418124  | 2.491123472  | -0.570753446  |
| N422 | 0.868353104  | 1.790393921  | -0.860086243  |
| O423 | -6.435416472 | -5.397760683 | 1.742495193   |
| O424 | -7.546397968 | -3.092761306 | 4.313762659   |
| O425 | -5.942983161 | -5.323793056 | 6.828030848   |
| O426 | -2.732929822 | -4.493324506 | 5.169275102   |
| O427 | -3.062780710 | -0.931466699 | 5.153843410   |
| O428 | -3.804518979 | -0.948076964 | 8.696704373   |
| O429 | -1.541855425 | -3.974685183 | 10.196111573  |
| O430 | 1.773544238  | -3.898623063 | 6.919770323   |
| O431 | 1.612186997  | 0.274894750  | 7.244094080   |
| O432 | 0.049913770  | 2.247099678  | 9.782650203   |
| O433 | 0.408684960  | 0.282447358  | 12.738181941  |
| O434 | 7.527506638  | -9.680403428 | 2.916070499   |
| O435 | 8.170447139  | -6.555369580 | 6.296955765   |
| O436 | 11.833554902 | -3.592750469 | 5.022688441   |
| O437 | -5.626610496 | -1.104789967 | 0.026603161   |
| O438 | -3.425797435 | -4.845635420 | -3.779012990  |
| O439 | -7.724521467 | 2.137721397  | -0.902136108  |
| O440 | -6.573948066 | 2.585360983  | -3.714723250  |
| O441 | -9.917749260 | 0.789607671  | 2.122695025   |
| O442 | -5.822074497 | 1.580442491  | 4.297904104   |
| O443 | -4.568038402 | 5.107694013  | 3.337976874   |
| O444 | -7.154561490 | 7.172735475  | 4.783336727   |
| O445 | 10.337275553 | 0.393307607  | 4.629757732   |
| O446 | 3.296708748  | 5.335984839  | 3.875074793   |
| O447 | 3.326368368  | 8.865034797  | -1.089595861  |
| O448 | 0.616491088  | 9.628317257  | -3.996670171  |
| O449 | -1.569569220 | 6.941795852  | -2.066722888  |
| O450 | -0.948265784 | 7.955214889  | 1.741443059   |
| O451 | 2.111010686  | 6.246054552  | 1.349866063   |
| O452 | 0.311253836  | 12.346809856 | 1.368673990   |
| O453 | -3.454366128 | 13.790728568 | -0.162495165  |
| O454 | -3.939771825 | 11.175304730 | -2.502835400  |
| O455 | -5.661552496 | 13.493334486 | 2.993805880   |
| O456 | -5.678148965 | 6.523496431  | -1.971110330  |
| O457 | 2.250781974  | -4.788905471 | -8.518702602  |
| O458 | -0.042934001 | -1.091018039 | -8.506778641  |
| O459 | 1.850258653  | 3.510896827  | -8.375205177  |
| O460 | 6.315984304  | 3.866564675  | -8.807936832  |
| O461 | -4.647704791 | -3.260116908 | -8.913055856  |
| O462 | -0.945394496 | -6.822025252 | -5.717109889  |
| O463 | 0.939834119  | -5.948900149 | -6.526242873  |
| O464 | -3.861595779 | 1.772239849  | -8.566453106  |
| O465 | 10.345839505 | -4.903694311 | -3.195045324  |
| O466 | 13.132744502 | -6.309990972 | -1.539754385  |

|                  |                                 |              |               |               |              |
|------------------|---------------------------------|--------------|---------------|---------------|--------------|
|                  | O467                            | 0.070175092  | -6.505071002  | -0.349265278  |              |
|                  | O468                            | 0.719560480  | -8.388269854  | 0.638708098   |              |
|                  | O469                            | 5.574750178  | -10.714350166 | -2.550806433  |              |
|                  | O470                            | 3.360768064  | -10.765596384 | -2.994964524  |              |
|                  | O471                            | 5.351643034  | -5.542990314  | -1.024457253  |              |
|                  | O472                            | 5.314158978  | -7.236263357  | 0.459150744   |              |
|                  | O473                            | 2.919640950  | -6.004929242  | -1.919139308  |              |
|                  | O474                            | 9.279904059  | -5.970333039  | 1.511732843   |              |
|                  | O475                            | 7.338938535  | -4.187124208  | 0.480988857   |              |
|                  | O476                            | -4.605450339 | 4.316278056   | -2.916842705  |              |
|                  | O477                            | 8.437884511  | -10.015766866 | -1.560548440  |              |
|                  | O478                            | 7.857122909  | -8.204694656  | 0.589494182   |              |
|                  | S479                            | 3.763982945  | 5.268511571   | -2.544100948  |              |
|                  | S480                            | 2.197384643  | 1.988406561   | -3.368099672  |              |
|                  | S481                            | 2.292010212  | -3.362821885  | -3.662041640  |              |
|                  | S482                            | 3.868139918  | 2.186666982   | -0.202964757  |              |
|                  | S483                            | 0.071975793  | -2.058607498  | -1.208762045  |              |
|                  | S484                            | 4.257111483  | -0.648708612  | -5.501857308  |              |
|                  | S485                            | 3.475086992  | -3.244092075  | -0.168122035  |              |
|                  | S486                            | 5.874939706  | 1.841073531   | -3.079246570  |              |
|                  | S487                            | 5.894709516  | -2.940551957  | -2.930462867  |              |
|                  | S488                            | 6.312704984  | -0.658761251  | -0.040973283  |              |
| <b>10, 47(2)</b> | <b>bm2unh2b2n2x2n2nas.car_2</b> |              |               |               |              |
| Fe1              | 3.17                            | C1           | -7.601261608  | -5.687380490  | 0.535199242  |
| Fe2              | -0.31                           | C2           | -7.655071924  | -6.935608898  | -0.350401413 |
| Fe3              | 2.89                            | C3           | -8.829641665  | -3.757880910  | 1.426889202  |
| Fe4              | -2.59                           | C4           | -8.523312461  | -3.914988441  | 2.914506595  |
| Fe5              | 2.36                            | C5           | -8.579083969  | -5.349485220  | 4.890397731  |
| Fe6              | 0.11                            | C6           | -7.081524809  | -5.481041953  | 5.190192891  |
| Fe7              | -2.16                           | C7           | -4.868379605  | -6.052722155  | 4.305554542  |
|                  |                                 | C8           | -4.200102705  | -4.676609291  | 4.212769339  |
|                  |                                 | C9           | -4.171312768  | -2.478477828  | 3.154159257  |
|                  |                                 | C10          | -4.453423408  | -1.609377582  | 4.390227536  |
|                  |                                 | C11          | -5.958277017  | -1.052392077  | 6.212964548  |
|                  |                                 | C12          | -5.207633332  | -1.535536923  | 7.463222297  |
|                  |                                 | C13          | -4.686794690  | -3.440957813  | 8.912398026  |
|                  |                                 | C14          | -3.183458131  | -3.734806926  | 8.987017914  |
|                  |                                 | C15          | -1.168879656  | -4.463958433  | 7.779313267  |
|                  |                                 | C16          | -0.192124983  | -3.470205342  | 7.144295852  |
|                  |                                 | C17          | -0.003982811  | -1.301212804  | 5.941643567  |
|                  |                                 | C18          | -0.126258899  | 0.011180566   | 6.735523567  |
|                  |                                 | C19          | -0.402911470  | -1.158428294  | 4.453226023  |
|                  |                                 | C20          | 0.194589059   | 0.116403317   | 3.851374820  |
|                  |                                 | C21          | -0.006752150  | -2.413323652  | 3.668041123  |
|                  |                                 | C22          | -1.559049219  | 1.899910051   | 7.384269630  |
|                  |                                 | C23          | -1.601704936  | 1.744228359   | 8.914552607  |
|                  |                                 | C24          | -2.811167615  | 2.610228301   | 6.815269822  |
|                  |                                 | C25          | -3.114456014  | 3.902070847   | 7.581637943  |
|                  |                                 | C26          | -2.636348021  | 2.905776855   | 5.318917318  |
|                  |                                 | C27          | -2.471282762  | 0.525026478   | 10.826006727 |
|                  |                                 | C28          | -1.123033987  | 0.416754228   | 11.509759579 |
|                  |                                 | C29          | 5.960098370   | -10.645227298 | 5.805209891  |
|                  |                                 | C30          | 6.497606740   | -9.430446896  | 5.045132813  |
|                  |                                 | C31          | 6.641057731   | -6.935274473  | 5.144702766  |
|                  |                                 | C32          | 7.695705178   | -6.389595185  | 6.126195728  |
|                  |                                 | C33          | 5.425992531   | -5.997121474  | 5.022224379  |
|                  |                                 | C34          | 5.780401819   | -4.577459242  | 4.568740654  |
|                  |                                 | C35          | 4.528971248   | -3.809556715  | 4.133163663  |
|                  |                                 | C36          | 4.454806244   | -1.304798036  | 4.159712969  |
|                  |                                 | C37          | 9.948109721   | -5.447668777  | 6.343075824  |
|                  |                                 | C38          | 10.161805402  | -3.954828291  | 6.207356219  |

|      |               |              |              |
|------|---------------|--------------|--------------|
| C39  | -4.945529340  | -3.054260594 | -1.967384606 |
| C40  | -5.455220102  | -1.619666317 | -1.743315593 |
| C41  | -3.421788877  | -3.064292347 | -1.716127979 |
| C42  | -2.762043812  | -4.452870453 | -1.601446837 |
| C43  | -2.281605788  | -5.054753594 | -2.920154299 |
| C44  | -6.099468152  | 0.439737100  | -2.915178874 |
| C45  | -7.465738985  | 0.832144041  | -2.341198069 |
| C46  | -5.910917626  | 1.045669120  | -4.320761560 |
| C47  | -9.466463200  | 0.098073008  | -1.143785684 |
| C48  | -9.176157167  | 0.378083076  | 0.337927528  |
| C49  | -7.548306064  | 0.278196764  | 2.176210627  |
| C50  | -6.500975472  | 1.357345290  | 2.447218978  |
| C51  | -4.929106137  | 3.010031945  | 1.538683753  |
| C52  | -5.523045215  | 4.364163922  | 2.004867199  |
| C53  | -4.172326472  | 3.306118722  | 0.235862885  |
| C54  | -3.402840847  | 2.189475010  | -0.400669820 |
| C55  | -2.798162241  | 1.044255603  | 0.060498364  |
| C56  | -2.337767070  | 1.212060460  | -2.105423492 |
| C57  | -7.466504105  | 5.882507624  | 1.779947427  |
| C58  | -7.647799810  | 6.163591385  | 3.268794314  |
| C59  | -8.833597073  | 5.807572726  | 1.060429555  |
| C60  | -9.472522165  | 7.120304013  | 0.711748549  |
| C61  | -9.567383897  | 8.298157260  | 1.428151484  |
| C62  | -10.568736432 | 8.506502313  | -0.537562386 |
| C63  | 8.486307570   | 2.295655612  | 4.587366831  |
| C64  | 9.491299820   | 1.163213374  | 4.675961642  |
| C65  | 7.114483340   | 1.654299502  | 4.260518311  |
| C66  | 5.987327697   | 2.658873119  | 4.227653474  |
| C67  | 5.253261062   | 2.978895029  | 5.384687282  |
| C68  | 5.635634680   | 3.303377668  | 3.027345303  |
| C69  | 4.200603409   | 3.901441055  | 5.347004826  |
| C70  | 4.599577308   | 4.235491284  | 2.976959078  |
| C71  | 3.880027004   | 4.531966400  | 4.137505901  |
| C72  | 5.371828553   | 7.394569990  | -1.096362677 |
| C73  | 4.287663370   | 8.318255273  | -1.667659200 |
| C74  | 4.770825936   | 6.018404896  | -0.769702085 |
| C75  | 3.381505114   | 9.384977472  | -3.689309870 |
| C76  | 1.998234584   | 8.763044693  | -3.879749801 |
| C77  | 0.626021769   | 6.715939829  | -3.823125531 |
| C78  | -0.112486989  | 6.651150951  | -2.470456786 |
| C79  | 0.858798328   | 5.325233029  | -4.440753476 |
| C80  | -0.370102761  | 4.435373308  | -4.662213343 |
| C81  | -1.346564084  | 4.850575769  | -5.777912374 |
| C82  | -2.781564186  | 6.895830665  | -5.689806396 |
| C83  | -0.001109474  | 6.428466592  | -0.044447137 |
| C84  | -0.256368360  | 7.826611526  | 0.555523407  |
| C85  | 0.772982119   | 5.592243485  | 0.981088301  |
| C86  | 0.704545578   | 10.042623529 | 0.954353133  |
| C87  | -0.018301484  | 11.295409517 | 0.465216372  |
| C88  | -1.481702853  | 12.323582811 | -1.225521731 |
| C89  | -2.874267249  | 12.663783809 | -0.652361839 |
| C90  | -1.550309429  | 12.186568567 | -2.763768498 |
| C91  | -2.401411431  | 10.992705452 | -3.177827384 |
| C92  | -4.801131096  | 11.869231164 | 0.643911746  |
| C93  | -4.903021465  | 12.986521948 | 1.676865512  |
| C94  | -5.287506694  | 10.530749582 | 1.258089413  |
| C95  | -5.364082045  | 9.417540072  | 0.237393731  |
| C96  | -6.480646725  | 9.305704587  | -0.606555974 |
| C97  | -4.313731247  | 8.500065533  | 0.072293631  |
| C98  | -6.546944592  | 8.322386314  | -1.596905460 |
| C99  | -4.352213335  | 7.521835172  | -0.927834112 |
| C100 | -5.469741643  | 7.448042783  | -1.755183333 |



|       |              |               |              |
|-------|--------------|---------------|--------------|
| C101  | 5.449196465  | -4.241850092  | -8.154812414 |
| C102  | 3.970859580  | -4.077963666  | -7.848312067 |
| C103  | 2.261553847  | -2.587301434  | -6.845371403 |
| C104  | 1.745644715  | -1.305188748  | -7.505695987 |
| C105  | 1.946899986  | 1.134236617   | -7.577261957 |
| C106  | 3.028617984  | 2.210798878   | -7.639478326 |
| C107  | 5.236482163  | 3.012149742   | -6.957149094 |
| C108  | 6.243916589  | 2.949324990   | -8.089591087 |
| C109  | -1.333767423 | -4.263835734  | -9.167540386 |
| C110  | -2.450027677 | -3.215531581  | -9.066127033 |
| C111  | -1.007118497 | -4.803388178  | -7.755710675 |
| C112  | -0.163893851 | -6.089175465  | -7.822251058 |
| C113  | 0.377018490  | -6.444160932  | -6.454846183 |
| C114  | -3.049806226 | -0.887582573  | -8.608691928 |
| C115  | -2.567273135 | 0.389447280   | -9.270965573 |
| C116  | -3.556397052 | -0.706205489  | -7.154792942 |
| C117  | -2.435450137 | -0.664255221  | -6.147226044 |
| C118  | -1.723000197 | 0.520911015   | -5.892557384 |
| C119  | -2.016210352 | -1.845979075  | -5.510328302 |
| C120  | -0.600030331 | 0.508584466   | -5.057503906 |
| C121  | -0.891609825 | -1.858632728  | -4.679771856 |
| C122  | -0.168167031 | -0.681414589  | -4.462077052 |
| C123  | 8.810750538  | -5.951616857  | -3.132804629 |
| C124  | 9.846252723  | -5.909207724  | -1.996904726 |
| C125  | 7.447737222  | -6.485225763  | -2.661571240 |
| C126  | 6.334187161  | -6.399517336  | -3.660327350 |
| C127  | 6.226184587  | -7.086017027  | -4.853823973 |
| C128  | 4.354746460  | -5.964862519  | -4.474107995 |
| C129  | 10.934727578 | -7.004835042  | -0.116364188 |
| C130  | 12.328183585 | -6.709154647  | -0.625057193 |
| C131  | 0.981704502  | -7.066695704  | 0.475429881  |
| C132  | 2.359283690  | -6.572903583  | 0.814773925  |
| C133  | 3.420496237  | -6.816568793  | -0.333470594 |
| C134  | 3.432417098  | -8.323227777  | -0.720116927 |
| C135  | 4.566707138  | -8.677407363  | -1.697630621 |
| C136  | 4.786948002  | -10.156239464 | -1.849882870 |
| C137  | 4.815251328  | -6.500914993  | 0.290796460  |
| C138  | 3.895177562  | -0.672073160  | -1.697776100 |
| Fe139 | 4.495073652  | -1.977518034  | -3.163693967 |
| Fe140 | 2.385666867  | 0.717137050   | -1.030016790 |
| Fe141 | 5.129339051  | 0.656570343   | -0.752933659 |
| Fe142 | 4.346783074  | 0.562170646   | -3.240950541 |
| Fe143 | 4.099906679  | 2.901728041   | -2.046373262 |
| Fe144 | 5.021503250  | -1.911041908  | -0.630395723 |
| Fe145 | 2.615635429  | -2.126218810  | -1.467489272 |
| H146  | -5.746001517 | -7.555158003  | 0.006100048  |
| H147  | -5.919090789 | -6.780893283  | -1.422153608 |
| H148  | -9.560362538 | -5.250052304  | 0.079276351  |
| H149  | -8.298313588 | -6.742085957  | -1.222570022 |
| H150  | -8.168011586 | -7.713595865  | 0.242404919  |
| H151  | -8.110711695 | -3.020805605  | 1.042249069  |
| H152  | -9.335668488 | -5.801399727  | 2.926715725  |
| H153  | -9.840268128 | -3.341691797  | 1.320324731  |
| H154  | -9.081472058 | -6.279310051  | 5.188711038  |
| H155  | -6.731663014 | -6.127025870  | 3.273203670  |
| H156  | -8.956960616 | -4.533220264  | 5.520065354  |
| H157  | -3.081281729 | -2.487391739  | 3.017747596  |
| H158  | -5.391244520 | -4.164853239  | 2.602475486  |
| H159  | -4.486158852 | -6.697207985  | 3.502048516  |
| H160  | -5.702473532 | 0.004590275   | 6.067800998  |
| H161  | -6.346268037 | -2.420349472  | 4.596201522  |
| H162  | -4.577248629 | -6.488630567  | 5.268725343  |

|      |              |              |               |
|------|--------------|--------------|---------------|
| H163 | -4.622746863 | -2.013120263 | 2.265468965   |
| H164 | -5.698868889 | -3.500941925 | 7.034007253   |
| H165 | -7.038258754 | -1.130219366 | 6.396425626   |
| H166 | -0.470268727 | -3.314150457 | 4.097129021   |
| H167 | -0.338687824 | -2.327345706 | 2.622564044   |
| H168 | 1.084283688  | -2.553796543 | 3.654604372   |
| H169 | -1.500394558 | -1.070057928 | 4.413153589   |
| H170 | -5.213414421 | -4.388555669 | 9.095838576   |
| H171 | -2.502681665 | 1.992321371  | 4.722032834   |
| H172 | -2.942915541 | 0.159687577  | 8.779275634   |
| H173 | -3.333895056 | 3.716110545  | 8.642289489   |
| H174 | -0.070208312 | 0.188959825  | 2.787773676   |
| H175 | 1.291057336  | 0.112154438  | 3.912536784   |
| H176 | 8.411172513  | 2.747311016  | 5.596038914   |
| H177 | -3.524315735 | 3.427747386  | 4.933194590   |
| H178 | -3.987835746 | 4.399502264  | 7.135576026   |
| H179 | -1.762290382 | 3.556881765  | 5.154336594   |
| H180 | -2.261197455 | 4.596882901  | 7.530255495   |
| H181 | -3.668872600 | 1.924505478  | 6.940413511   |
| H182 | -0.675366162 | 2.527475848  | 7.193326468   |
| H183 | -2.101818391 | 0.227690569  | 6.147533117   |
| H184 | -0.175310075 | 1.023314102  | 4.350056800   |
| H185 | 1.044040065  | 4.627427772  | 0.519865340   |
| H186 | 0.089803706  | 5.399692961  | 1.823962317   |
| H187 | 2.191740736  | 5.953811227  | 2.290266924   |
| H188 | 2.391165320  | 5.530393325  | 4.886260731   |
| H189 | 4.319468077  | 4.700334358  | 2.031180153   |
| H190 | 6.150130431  | 3.039192386  | 2.101394335   |
| H191 | 5.495796935  | 2.491685834  | 6.333245998   |
| H192 | -1.770802298 | -2.286589110 | 6.648004324   |
| H193 | -1.069339939 | -5.412625650 | 7.230923081   |
| H194 | -0.834155730 | -4.633190114 | 8.811706360   |
| H195 | -3.109703789 | -4.171486550 | 6.956445024   |
| H196 | -4.907154510 | -2.756985711 | 9.742394115   |
| H197 | 3.625577184  | 4.121951718  | 6.250209438   |
| H198 | 1.053775055  | -1.589335682 | 6.012488060   |
| H199 | -3.056896497 | 1.319774214  | 11.316097821  |
| H200 | -2.994792620 | -0.429998031 | 10.991408367  |
| H201 | -0.292532303 | 0.045801917  | 10.864853817  |
| H202 | 10.880866546 | -5.973583117 | 6.094607453   |
| H203 | -0.771205236 | -6.177203570 | -3.727931223  |
| H204 | 1.410078116  | -8.689489197 | 1.426112771   |
| H205 | -0.794780669 | -6.921498144 | -8.167521218  |
| H206 | 0.663716066  | -5.963315416 | -8.535869059  |
| H207 | -1.938906830 | -5.011882219 | -7.207861373  |
| H208 | -1.895132785 | 0.226047311  | -10.146018965 |
| H209 | -1.798629974 | -5.082821114 | -9.737421820  |
| H210 | -2.928217142 | -2.480931900 | -2.509239278  |
| H211 | -3.465816427 | -5.174523125 | -1.151879415  |
| H212 | -1.075978472 | -1.730334845 | -8.599902141  |
| H213 | -3.919076691 | -1.200760217 | -9.221972698  |
| H214 | 0.374804140  | -3.112380070 | -9.426926660  |
| H215 | -0.565140736 | -5.804199033 | -2.016973854  |
| H216 | -0.480554259 | -4.019880095 | -7.188704223  |
| H217 | 0.401149329  | -4.553555808 | -10.226569925 |
| H218 | -6.143837097 | -4.079161648 | -3.302161264  |
| H219 | -3.249877593 | -2.531996821 | -0.769766083  |
| H220 | 2.105195533  | -5.669718454 | -6.995309881  |
| H221 | -1.910273838 | -4.383400932 | -0.910209825  |
| H222 | -4.235046182 | 2.695727172  | 2.330765330   |
| H223 | -2.778661962 | 0.599490594  | 1.048357938   |
| H224 | -8.453544747 | 0.567780984  | 2.726186919   |

|      |               |              |              |
|------|---------------|--------------|--------------|
| H225 | -7.241213805  | -0.378699140 | 0.164893758  |
| H226 | -7.317715025  | 3.829176782  | 1.178243988  |
| H227 | -9.192716228  | 8.596695327  | 2.400793117  |
| H228 | -7.857559021  | 5.251665049  | 3.879725276  |
| H229 | -9.520693186  | 5.179640082  | 1.655256866  |
| H230 | -6.849541418  | 6.683029178  | 1.342735403  |
| H231 | -11.123066608 | 8.970500644  | -1.348649030 |
| H232 | -3.472533717  | 4.128095656  | 0.458027305  |
| H233 | -4.885589369  | 3.702374143  | -0.505141655 |
| H234 | -10.507587804 | 10.127673687 | 0.841692061  |
| H235 | -8.673400667  | 5.278185236  | 0.108158981  |
| H236 | -6.162911507  | 1.632051774  | 0.429628807  |
| H237 | -7.191354165  | -0.661945227 | 2.622962794  |
| H238 | -10.005811903 | 0.970578710  | -1.532843899 |
| H239 | -1.930089970  | 1.004966413  | -3.093075618 |
| H240 | -10.139634769 | -0.767602009 | -1.203331209 |
| H241 | 9.680945462   | 3.794248632  | 3.866836902  |
| H242 | 8.133617379   | 3.889014880  | 3.353870346  |
| H243 | 1.628140422   | 6.173867663  | -1.450663397 |
| H244 | -0.993347653  | 5.972767276  | -0.173484812 |
| H245 | 1.415202815   | 8.569026029  | -0.379188645 |
| H246 | -3.411923729  | 3.033404044  | -2.389967070 |
| H247 | -4.864191935  | 3.672355315  | -3.866143226 |
| H248 | -4.703760933  | 5.001928318  | -3.016458778 |
| H249 | -4.893927318  | 0.829061315  | -4.675182844 |
| H250 | -6.631388293  | 0.596288666  | -5.023973265 |
| H251 | -0.524310661  | 12.106554693 | -3.150901051 |
| H252 | -2.010466104  | 13.101010234 | -3.159704900 |
| H253 | -0.704502977  | 9.806807693  | -3.587675020 |
| H254 | -2.252150136  | 8.998624962  | -3.595938564 |
| H255 | -2.392684548  | 8.455629690  | -6.958041866 |
| H256 | -1.770358877  | 3.953132659  | -6.252479152 |
| H257 | -7.428038325  | 8.244034862  | -2.238927758 |
| H258 | -3.438363464  | 8.530355458  | 0.727847440  |
| H259 | -4.215948851  | 7.170451586  | -4.232375958 |
| H260 | 1.561418755   | 4.768941874  | -3.800008924 |
| H261 | 2.721329822   | 6.884824902  | -3.406614648 |
| H262 | -0.922786783  | 4.287488053  | -3.721287882 |
| H263 | -7.999370997  | -1.118173335 | -2.138918914 |
| H264 | 3.771641118   | 9.638541100  | -4.684054662 |
| H265 | -5.714449811  | -1.578361499 | -3.725474207 |
| H266 | 1.369241641   | 5.479465974  | -5.405706667 |
| H267 | -3.501512880  | 6.856113156  | -1.083162137 |
| H268 | -6.806599854  | 2.642302346  | -3.646700834 |
| H269 | 3.225224187   | 10.323937851 | -3.140513241 |
| H270 | -1.651976836  | 6.963275958  | -7.409778019 |
| H271 | -4.183922512  | 8.369231246  | -5.476661871 |
| H272 | -4.519710588  | -4.087700799 | -3.695850567 |
| H273 | -5.419755919  | -3.658193376 | -1.171019364 |
| H274 | -7.320186552  | 9.995276445  | -0.487188402 |
| H275 | -5.382879522  | 0.939204745  | -2.241864391 |
| H276 | -0.024185509  | 7.318402885  | -4.471647432 |
| H277 | -0.802722691  | 5.388776697  | -6.563983518 |
| H278 | 0.027268214   | 3.449957614  | -4.939004416 |
| H279 | -3.093777833  | 5.207261887  | -4.604568288 |
| H280 | 0.331328288   | 9.849196101  | 1.971348060  |
| H281 | -0.844396252  | 10.267811657 | -1.109861831 |
| H282 | -0.856174027  | 13.196175733 | -0.986593641 |
| H283 | 1.768596471   | 10.304974232 | 1.030955946  |
| H284 | -2.923606457  | 10.873346717 | 0.327895736  |
| H285 | 5.912158926   | -3.256549626 | -8.312134808 |
| H286 | 5.903499016   | -4.666207991 | -7.235149877 |

|      |              |               |              |
|------|--------------|---------------|--------------|
| H287 | 8.688068295  | -4.906544309  | -3.452164618 |
| H288 | 6.606541487  | -5.364551724  | -9.404560519 |
| H289 | 5.073237768  | -5.920280394  | -9.242661989 |
| H290 | 5.577665673  | 5.373368773   | -0.399341396 |
| H291 | 5.241519881  | 8.219362911   | 0.762526503  |
| H292 | 5.074405843  | 8.087167562   | -3.548515988 |
| H293 | 4.009008670  | 6.131470895   | 0.014404421  |
| H294 | 6.480752532  | 8.815542304   | -0.119730092 |
| H295 | 5.773153265  | 2.926729366   | -5.999398905 |
| H296 | 6.163749784  | 7.257626952   | -1.849046682 |
| H297 | 4.902278982  | -5.967561046  | 5.992526713  |
| H298 | 7.091507644  | -7.075696444  | 4.154551989  |
| H299 | 4.379797846  | 1.128750107   | -6.477496517 |
| H300 | 4.477264942  | 0.725825786   | 3.877273351  |
| H301 | 1.565177665  | 0.992262729   | -8.596941901 |
| H302 | -0.572907768 | -2.788136617  | -4.201914207 |
| H303 | 1.117480816  | 1.567046707   | -6.992459797 |
| H304 | 3.802284920  | -3.725371228  | 4.953199806  |
| H305 | 2.940961748  | -0.254179374  | -6.226752502 |
| H306 | 4.024801592  | -4.358127372  | 3.322263530  |
| H307 | 4.744081957  | -6.460438146  | 4.290853355  |
| H308 | 6.468147059  | -4.611121033  | 3.709895255  |
| H309 | 6.288397004  | -4.025910600  | 5.376480435  |
| H310 | -4.230575010 | -1.546385622  | -6.934249739 |
| H311 | 5.731659024  | -8.321292876  | 6.520888772  |
| H312 | 5.132417795  | -11.038988687 | 5.195310486  |
| H313 | 0.722059873  | -0.679450582  | -3.829696239 |
| H314 | 6.201012504  | -10.435540796 | 7.839966672  |
| H315 | 4.713502775  | -10.968841884 | 7.410220989  |
| H316 | 5.228357089  | -2.419374294  | 2.676289622  |
| H317 | -0.033699269 | 1.421686898   | -4.866237472 |
| H318 | -2.570932486 | -2.773294323  | -5.668805436 |
| H319 | 8.308974084  | -9.455257787  | 0.396928467  |
| H320 | 7.566411727  | -7.545151047  | -2.372806254 |
| H321 | 6.911614782  | -7.757885991  | 1.448547883  |
| H322 | 7.737245661  | -10.288199004 | -0.767243452 |
| H323 | 6.048695843  | 2.164678729   | -8.860399796 |
| H324 | 6.668803162  | -4.668554247  | 0.829340159  |
| H325 | 2.726309344  | -7.039551970  | 1.741220826  |
| H326 | 4.349211893  | -2.269923925  | -6.956219410 |
| H327 | 3.558393231  | -8.910256252  | 0.203055570  |
| H328 | 4.562532782  | -7.168096819  | -6.201377156 |
| H329 | 3.342812525  | -5.603006341  | -4.608804213 |
| H330 | 6.759894571  | -11.404734433 | 5.785227712  |
| H331 | 4.969964619  | -0.228275810  | 2.480355893  |
| H332 | 8.556002618  | -5.208757228  | 2.253230469  |
| H333 | 7.348493484  | -3.281779421  | 0.990052179  |
| H334 | 8.930634687  | -5.952630221  | 4.508964541  |
| H335 | 4.099836727  | -1.993194290  | 6.068644064  |
| H336 | 3.928866788  | -11.757771057 | -2.379911601 |
| H337 | 4.339803497  | -8.247071442  | -2.684177954 |
| H338 | 5.518689814  | -8.255895987  | -1.356927542 |
| H339 | 2.464108081  | -8.587147714  | -1.170089095 |
| H340 | 2.246910685  | -2.494255824  | -5.747213169 |
| H341 | -2.038888032 | 1.449183208   | -6.376604171 |
| H342 | -4.149236647 | 0.220842091   | -7.134520854 |
| H343 | 2.307822683  | -5.485083576  | 0.954916046  |
| H344 | 8.719038274  | -6.750223936  | 2.312395427  |
| H345 | 7.565031981  | -8.685166996  | 2.517439982  |
| H346 | 3.686274458  | -0.348421724  | 5.798924276  |
| H347 | 6.922727224  | -7.739688461  | -5.366356004 |
| H348 | 7.144763643  | -5.944445638  | -1.756322555 |

|       |               |               |              |
|-------|---------------|---------------|--------------|
| H349  | 1.605974946   | -3.407045321  | -7.146539221 |
| H350  | 4.758382644   | 4.003835236   | -6.982873114 |
| H351  | 6.917845937   | 0.888101675   | 5.025356288  |
| H352  | 7.190035762   | 1.144563344   | 3.286077779  |
| H353  | 10.184595026  | -6.261997314  | -4.624302204 |
| H354  | 9.596809044   | -7.652038490  | -3.992118546 |
| H355  | 10.950673030  | -8.015594913  | 0.319477745  |
| H356  | 9.304350203   | -7.788804227  | -1.244741804 |
| H357  | 12.507885069  | -6.976899144  | -1.693959900 |
| H358  | 10.679098695  | -6.299451375  | 0.691131366  |
| H359  | 9.951749934   | 0.874730349   | 3.700743842  |
| H360  | -3.944356264  | 13.260407493  | 2.177360189  |
| H361  | 9.709240047   | -5.643719317  | 7.402002356  |
| H362  | 9.252330232   | -3.367449142  | 5.932677052  |
| H363  | -5.463248238  | 12.143764488  | -0.193930805 |
| H364  | -4.616465235  | 10.246785686  | 2.084037017  |
| H365  | -6.279547115  | 10.716330367  | 1.695598181  |
| H366  | -6.338888963  | 6.489754511   | -3.213447945 |
| H367  | 0.313773204   | -1.913757230  | 0.161748351  |
| H368  | -1.475200644  | -0.339053079  | -0.996227841 |
| Mo369 | 4.275440373   | -4.251241076  | -1.699182516 |
| N370  | 2.173396478   | -0.568209462  | 1.619508885  |
| N371  | 2.248993576   | -0.117039946  | 0.592753457  |
| N372  | -6.371900703  | -7.453399604  | -0.797781040 |
| N373  | -8.767053812  | -4.995082467  | 0.662652539  |
| N374  | -8.876206673  | -5.090402007  | 3.490751953  |
| N375  | -6.318192552  | -5.998596644  | 4.196169468  |
| N376  | -4.686994540  | -3.835441261  | 3.264203124  |
| N377  | -5.640679862  | -1.809497635  | 5.013476797  |
| N378  | -5.193762657  | -2.878619277  | 7.670497685  |
| N379  | -2.563989768  | -4.056901099  | 7.816397897  |
| N380  | -0.756224446  | -2.357177746  | 6.609878491  |
| N381  | -1.351705721  | 0.610019786   | 6.725879002  |
| N382  | -2.349270408  | 0.718971001   | 9.394546650  |
| N383  | 5.458908779   | -10.323126823 | 7.146362620  |
| N384  | 6.211327479   | -8.245690590  | 5.617001727  |
| N385  | 4.834899867   | -2.471418991  | 3.620863949  |
| N386  | 3.910650013   | -1.254533520  | 5.398779267  |
| N387  | 4.566509045   | -0.186469767  | 3.438364786  |
| N388  | 8.837165628   | -5.939566488  | 5.547767082  |
| N389  | -5.294461754  | -3.511290452  | -3.317444723 |
| N390  | -1.120431769  | -5.734781879  | -2.871886658 |
| N391  | -5.814676593  | -0.979782726  | -2.887917820 |
| N392  | -8.291276908  | -0.161202985  | -1.954481800 |
| N393  | -7.922903317  | 0.072271144   | 0.786768054  |
| N394  | -5.943027001  | 1.977867807   | 1.360401419  |
| N395  | -3.104121660  | 2.257124307   | -1.756850592 |
| N396  | -2.155949770  | 0.458486119   | -1.015857951 |
| N397  | -6.801366762  | 4.593432708   | 1.606736383  |
| N398  | -10.101781458 | 7.263686811   | -0.515446649 |
| N399  | -10.265764260 | 9.166405865   | 0.615532357  |
| N400  | 8.894746940   | 3.229164186   | 3.536623813  |
| N401  | 5.990460120   | 7.948086227   | 0.116907586  |
| N402  | 4.360642401   | 8.564920951   | -3.004657406 |
| N403  | 1.901681276   | 7.423477488   | -3.735039937 |
| N404  | -2.477348670  | 5.658454377   | -5.305794350 |
| N405  | -2.135875917  | 7.507272656   | -6.703878583 |
| N406  | -3.706720678  | 7.606396329   | -5.004192311 |
| N407  | 0.642879138   | 6.458635580   | -1.355475786 |
| N408  | 0.582669679   | 8.827848304   | 0.159923265  |
| N409  | -0.846963614  | 11.159697269  | -0.611848721 |
| N410  | -1.713380491  | 9.840082187   | -3.395444958 |

|      |               |               |              |
|------|---------------|---------------|--------------|
| N411 | -3.438060594  | 11.733293914  | 0.155750896  |
| N412 | 5.629599600   | -5.067471912  | -9.353093277 |
| N413 | 3.615155026   | -2.909153556  | -7.281073374 |
| N414 | 2.314046322   | -0.168949570  | -7.050928650 |
| N415 | 4.219290447   | 1.979770970   | -7.030156767 |
| N416 | -0.202353060  | -3.771330824  | -9.963610761 |
| N417 | -2.063691635  | -1.940098807  | -8.779876116 |
| N418 | 9.325883314   | -6.709617091  | -4.290297999 |
| N419 | 5.151978786   | -5.692738456  | -3.444178105 |
| N420 | 4.973108975   | -6.797096515  | -5.348864946 |
| N421 | 9.948161720   | -6.999840794  | -1.185734101 |
| N422 | 0.067547064   | 2.500274766   | -0.604717706 |
| N423 | 0.908199485   | 1.758714882   | -0.752540582 |
| O424 | -6.572218099  | -5.353763957  | 1.151937251  |
| O425 | -7.985790846  | -2.993644956  | 3.549663370  |
| O426 | -6.624345870  | -5.150522111  | 6.296663390  |
| O427 | -3.273829961  | -4.352676227  | 4.972508573  |
| O428 | -3.629129715  | -0.769044919  | 4.780237604  |
| O429 | -4.683606595  | -0.728508677  | 8.248780249  |
| O430 | -2.610974782  | -3.711580702  | 10.085112396 |
| O431 | 1.022573860   | -3.717889892  | 7.130779891  |
| O432 | 0.841423001   | 0.490131101   | 7.344007285  |
| O433 | -0.986239068  | 2.515281123   | 9.668878207  |
| O434 | -0.954437435  | 0.651109976   | 12.697234404 |
| O435 | 7.120039218   | -9.598410785  | 3.974419531  |
| O436 | 7.484442800   | -6.389772873  | 7.352005792  |
| O437 | 11.236654224  | -3.408366892  | 6.396582438  |
| O438 | -5.524517480  | -1.090462519  | -0.614520089 |
| O439 | -2.937907648  | -4.939414571  | -3.981115613 |
| O440 | -7.744239188  | 2.043237028   | -2.203944436 |
| O441 | -6.071383092  | 2.472483781   | -4.291182703 |
| O442 | -10.071885756 | 0.841567651   | 1.053820254  |
| O443 | -6.197571238  | 1.652905657   | 3.605023827  |
| O444 | -4.833388839  | 5.192253008   | 2.606304918  |
| O445 | -7.601312350  | 7.272309384   | 3.773179958  |
| O446 | 9.772559595   | 0.575781770   | 5.711319037  |
| O447 | 2.845808258   | 5.441634455   | 4.028353536  |
| O448 | 3.395215063   | 8.814469076   | -0.954828688 |
| O449 | 1.045298501   | 9.506959243   | -4.191516261 |
| O450 | -1.347660668  | 6.786822262   | -2.434656469 |
| O451 | -1.164649664  | 7.986823995   | 1.382944491  |
| O452 | 1.933725946   | 6.306625672   | 1.413569096  |
| O453 | 0.142883159   | 12.367907121  | 1.061697606  |
| O454 | -3.424725150  | 13.738739962  | -0.930297326 |
| O455 | -3.640612706  | 11.053598740  | -3.211976006 |
| O456 | -5.956099380  | 13.534409734  | 1.960751854  |
| O457 | -5.461938206  | 6.487539287   | -2.783337288 |
| O458 | 3.164322974   | -5.010851920  | -8.096865538 |
| O459 | 0.875312042   | -1.333789454  | -8.402913737 |
| O460 | 2.757775532   | 3.276713538   | -8.218389036 |
| O461 | 7.207373986   | 3.694368966   | -8.165239329 |
| O462 | -3.643866442  | -3.529271278  | -9.210343281 |
| O463 | -0.299291075  | -6.977090153  | -5.579719366 |
| O464 | 1.656266863   | -6.106030043  | -6.204539778 |
| O465 | -2.903057188  | 1.514684138   | -8.931417037 |
| O466 | 10.629370042  | -4.949952588  | -1.866427713 |
| O467 | 13.226979598  | -6.282306986  | 0.086259146  |
| O468 | 0.138341995   | -6.454695892  | -0.163770732 |
| O469 | 0.658056512   | -8.323142660  | 0.922517409  |
| O470 | 5.826814210   | -10.755316539 | -1.587017247 |
| O471 | 3.692161725   | -10.807158585 | -2.324884919 |
| O472 | 5.456295545   | -5.521923492  | -0.259631030 |

|                  |                                |              |               |               |
|------------------|--------------------------------|--------------|---------------|---------------|
|                  | O473                           | 5.259821056  | -7.202964523  | 1.228273749   |
|                  | O474                           | 3.155456328  | -6.007524184  | -1.422093302  |
|                  | O475                           | 9.091757798  | -5.913656032  | 2.696477455   |
|                  | O476                           | 7.275883249  | -4.155721300  | 1.421186123   |
|                  | O477                           | -4.192410172 | 4.287126883   | -3.464060412  |
|                  | O478                           | 8.587370263  | -10.056883718 | -0.339446228  |
|                  | O479                           | 7.781626297  | -8.183323890  | 1.688775275   |
|                  | S480                           | 3.978159414  | 5.217222731   | -2.238518050  |
|                  | S481                           | 2.476743044  | 1.786372261   | -3.161240632  |
|                  | S482                           | 2.726344409  | -3.342519971  | -3.289447860  |
|                  | S483                           | 3.754562276  | 2.229250921   | 0.140487653   |
|                  | S484                           | 0.379623003  | -1.792605543  | -1.192107760  |
|                  | S485                           | 4.824373648  | -0.744000500  | -4.990976358  |
|                  | S486                           | 3.427603813  | -3.187285689  | 0.286417182   |
|                  | S487                           | 6.041452581  | 1.824554944   | -2.547172662  |
|                  | S488                           | 6.241596927  | -2.980749503  | -2.165871690  |
|                  | S489                           | 6.266342047  | -0.640427677  | 0.680199323   |
| <b>10, 35(1)</b> | <b>bm2unh2b2n2x6n235.car_1</b> |              |               |               |
| Fe1              | 3.17                           | C1           | -7.791551104  | -5.321974483  |
| Fe2              | 0.43                           | C2           | -7.964573617  | -6.562854872  |
| Fe3              | -2.56                          | C3           | -8.869458016  | -3.350147738  |
| Fe4              | 2.89                           | C4           | -8.460408988  | -3.545311903  |
| Fe5              | -2.41                          | C5           | -8.452402700  | -5.006057597  |
| Fe6              | -2.60                          | C6           | -6.943585318  | -5.196755253  |
| Fe7              | 2.41                           | C7           | -4.825194309  | -5.862058992  |
|                  |                                | C8           | -4.099049481  | -4.519641284  |
|                  |                                | C9           | -4.027021820  | -2.319278868  |
|                  |                                | C10          | -4.181505532  | -1.447818770  |
|                  |                                | C11          | -5.534606084  | -0.831493210  |
|                  |                                | C12          | -4.730621590  | -1.359577614  |
|                  |                                | C13          | -4.195216551  | -3.299676479  |
|                  |                                | C14          | -2.705936229  | -3.664154862  |
|                  |                                | C15          | -0.817033409  | -4.479562791  |
|                  |                                | C16          | 0.162471126   | -3.529997912  |
|                  |                                | C17          | 0.373864999   | -1.359944195  |
|                  |                                | C18          | 0.353997711   | -0.055620852  |
|                  |                                | C19          | -0.106024363  | -1.177067751  |
|                  |                                | C20          | 0.502155044   | 0.083997166   |
|                  |                                | C21          | 0.194071054   | -2.436307176  |
|                  |                                | C22          | -0.942236948  | 1.888191710   |
|                  |                                | C23          | -0.878398162  | 1.724145894   |
|                  |                                | C24          | -2.197717402  | 2.662825691   |
|                  |                                | C25          | -2.377942406  | 3.961331096   |
|                  |                                | C26          | -2.119682013  | 2.967078867   |
|                  |                                | C27          | -1.666874012  | 0.534923855   |
|                  |                                | C28          | -0.289791440  | 0.346280983   |
|                  |                                | C29          | 5.859813635   | -10.943393338 |
|                  |                                | C30          | 6.410435522   | -9.742887678  |
|                  |                                | C31          | 6.637115236   | -7.257475699  |
|                  |                                | C32          | 7.784284135   | -6.771232491  |
|                  |                                | C33          | 5.457045308   | -6.269977573  |
|                  |                                | C34          | 5.837959147   | -4.867875575  |
|                  |                                | C35          | 4.593346364   | -4.045299972  |
|                  |                                | C36          | 4.633870375   | -1.541280727  |
|                  |                                | C37          | 10.092491371  | -5.949460201  |
|                  |                                | C38          | 10.379332186  | -4.471412617  |
|                  |                                | C39          | -5.202693181  | -2.799616539  |
|                  |                                | C40          | -5.624162548  | -1.345249159  |
|                  |                                | C41          | -3.669544039  | -2.891185141  |
|                  |                                | C42          | -3.080467810  | -4.315325778  |
|                  |                                | C43          | -2.725453718  | -4.934272186  |

|      |               |              |              |
|------|---------------|--------------|--------------|
| C44  | -6.260472821  | 0.751583613  | -2.474650541 |
| C45  | -7.573449767  | 1.193610194  | -1.817006791 |
| C46  | -6.133706715  | 1.358583148  | -3.886598024 |
| C47  | -9.503081824  | 0.536650294  | -0.468746998 |
| C48  | -9.102107200  | 0.794533838  | 0.992153532  |
| C49  | -7.355445147  | 0.607866367  | 2.713277626  |
| C50  | -6.250207502  | 1.643431784  | 2.918064181  |
| C51  | -4.663499942  | 3.224664624  | 1.906437614  |
| C52  | -5.162450193  | 4.601154337  | 2.421919010  |
| C53  | -3.988593390  | 3.492154918  | 0.551788699  |
| C54  | -3.303439058  | 2.351101846  | -0.138445975 |
| C55  | -2.715992344  | 1.177071088  | 0.271981693  |
| C56  | -2.398400461  | 1.344554852  | -1.916771771 |
| C57  | -7.050705254  | 6.206654633  | 2.357494520  |
| C58  | -7.120279394  | 6.476383785  | 3.859012674  |
| C59  | -8.459618216  | 6.205444165  | 1.720319556  |
| C60  | -9.058208235  | 7.551752764  | 1.430833647  |
| C61  | -9.053284653  | 8.721721408  | 2.165940310  |
| C62  | -10.179551822 | 8.998759825  | 0.277060240  |
| C63  | 8.875908680   | 1.842971014  | 4.010450934  |
| C64  | 9.826261107   | 0.659198990  | 4.032921885  |
| C65  | 7.459172605   | 1.268712245  | 3.757661618  |
| C66  | 6.378368738   | 2.323464999  | 3.812980549  |
| C67  | 5.728548618   | 2.641194538  | 5.020634173  |
| C68  | 5.995464615   | 3.026060379  | 2.656930479  |
| C69  | 4.726502795   | 3.617198362  | 5.075327264  |
| C70  | 5.008502821   | 4.012149799  | 2.697715878  |
| C71  | 4.370541640   | 4.304266064  | 3.907140439  |
| C72  | 5.616645702   | 7.141122726  | -1.431686256 |
| C73  | 4.546205742   | 8.122169497  | -1.925099767 |
| C74  | 4.971437429   | 5.791774046  | -1.080013663 |
| C75  | 3.553043609   | 9.243725650  | -3.872390682 |
| C76  | 2.127844973   | 8.697012324  | -3.963822694 |
| C77  | 0.663508588   | 6.715633137  | -3.814025919 |
| C78  | 0.021088809   | 6.672443930  | -2.411170063 |
| C79  | 0.791343021   | 5.320548827  | -4.453092886 |
| C80  | -0.489649105  | 4.490929066  | -4.596129860 |
| C81  | -1.517791021  | 4.961088378  | -5.641891003 |
| C82  | -2.846499657  | 7.067456958  | -5.431053715 |
| C83  | 0.302721985   | 6.422469586  | 0.001614294  |
| C84  | 0.165125279   | 7.819771017  | 0.638559945  |
| C85  | 1.107967711   | 5.533566220  | 0.957604955  |
| C86  | 1.246564105   | 9.991937534  | 0.961346250  |
| C87  | 0.546087229   | 11.282017187 | 0.542156195  |
| C88  | -0.987942045  | 12.392791015 | -1.030369713 |
| C89  | -2.320202472  | 12.804405301 | -0.366473740 |
| C90  | -1.160771221  | 12.269600882 | -2.561769419 |
| C91  | -2.097574399  | 11.125912986 | -2.933002949 |
| C92  | -4.193581456  | 12.097711615 | 1.061212781  |
| C93  | -4.157232465  | 13.196801003 | 2.118158144  |
| C94  | -4.700726172  | 10.774545875 | 1.694604997  |
| C95  | -4.894128538  | 9.677345205  | 0.671215297  |
| C96  | -6.061790378  | 9.630568933  | -0.105429747 |
| C97  | -3.906560462  | 8.705937466  | 0.443917161  |
| C98  | -6.236887884  | 8.657684165  | -1.090553770 |
| C99  | -4.057085537  | 7.733944470  | -0.549936083 |
| C100 | -5.222939730  | 7.724872861  | -1.311161413 |
| C101 | 4.663095271   | -4.413358085 | -8.534368211 |
| C102 | 3.215909317   | -4.182637139 | -8.131516044 |
| C103 | 1.652321342   | -2.620320757 | -7.002920561 |
| C104 | 1.146315560   | -1.311705897 | -7.616850312 |
| C105 | 1.447431469   | 1.118730324  | -7.681306071 |



|       |              |               |              |
|-------|--------------|---------------|--------------|
| C106  | 2.569573759  | 2.144006689   | -7.816393123 |
| C107  | 4.863346834  | 2.833664213   | -7.325391540 |
| C108  | 5.787207627  | 2.749775535   | -8.524578462 |
| C109  | -2.178166196 | -4.110272478  | -9.066616660 |
| C110  | -3.236616266 | -3.015763112  | -8.884991367 |
| C111  | -1.761144434 | -4.667564142  | -7.685469594 |
| C112  | -0.999979054 | -5.998770249  | -7.824699062 |
| C113  | -0.378996085 | -6.402568358  | -6.505882028 |
| C114  | -3.692893955 | -0.662442165  | -8.380273536 |
| C115  | -3.195910288 | 0.589156772   | -9.077358983 |
| C116  | -4.075000663 | -0.461485331  | -6.890154956 |
| C117  | -2.879950947 | -0.490491335  | -5.969745238 |
| C118  | -2.099765861 | 0.658314720   | -5.747318687 |
| C119  | -2.475483680 | -1.699626647  | -5.374842858 |
| C120  | -0.931588848 | 0.585816864   | -4.979675814 |
| C121  | -1.306337596 | -1.772184069  | -4.610716475 |
| C122  | -0.520031210 | -0.629888586  | -4.422336290 |
| C123  | 8.273128571  | -6.320281198  | -3.790359349 |
| C124  | 9.395473662  | -6.332271154  | -2.739892911 |
| C125  | 6.931231893  | -6.804008851  | -3.217658041 |
| C126  | 5.749794622  | -6.670199561  | -4.128630558 |
| C127  | 5.534668594  | -7.331238427  | -5.321331859 |
| C128  | 3.737844539  | -6.146089833  | -4.803075750 |
| C129  | 10.550648796 | -7.472335710  | -0.927729648 |
| C130  | 11.917781992 | -7.263561861  | -1.539930977 |
| C131  | 0.671774118  | -7.148901619  | 0.374039372  |
| C132  | 2.090778532  | -6.711920221  | 0.617347721  |
| C133  | 3.051888000  | -6.993761440  | -0.604840531 |
| C134  | 2.971923916  | -8.494052933  | -1.002349043 |
| C135  | 4.015283784  | -8.875281274  | -2.066465424 |
| C136  | 4.169520328  | -10.358173888 | -2.257390611 |
| C137  | 4.501698309  | -6.737348998  | -0.087937421 |
| C138  | 3.729529332  | -0.800055304  | -1.982719654 |
| Fe139 | 4.068100513  | -2.163962236  | -3.461708019 |
| Fe140 | 2.442887921  | 0.683332551   | -1.204220487 |
| Fe141 | 5.140701381  | 0.424328323   | -1.142260173 |
| Fe142 | 4.153695426  | 0.385661355   | -3.528682319 |
| Fe143 | 4.241968317  | 2.727219833   | -2.191180177 |
| Fe144 | 4.860011554  | -2.110816985  | -1.009048455 |
| Fe145 | 2.303947409  | -2.240816493  | -1.607345297 |
| H146  | -6.061783552 | -7.265409704  | 0.368937018  |
| H147  | -6.313364850 | -6.490919799  | -1.048488703 |
| H148  | -9.755357054 | -4.791129433  | 0.717112291  |
| H149  | -8.660078884 | -6.336393190  | -0.667658022 |
| H150  | -8.471355890 | -7.318107104  | 0.782343441  |
| H151  | -8.150299169 | -2.637432529  | 1.600276972  |
| H152  | -9.378263389 | -5.381210773  | 3.539324378  |
| H153  | -9.866598530 | -2.890428389  | 2.005164704  |
| H154  | -8.965050229 | -5.926047285  | 5.756172357  |
| H155  | -6.756274035 | -5.841903812  | 3.696917462  |
| H156  | -8.761807562 | -4.194557725  | 6.117036653  |
| H157  | -2.949412540 | -2.383806534  | 3.222529227  |
| H158  | -5.370698831 | -3.934911806  | 2.952234290  |
| H159  | -4.521504763 | -6.519722834  | 3.778094672  |
| H160  | -5.239230288 | 0.214066454   | 6.444872952  |
| H161  | -6.096752669 | -2.163622767  | 5.005480808  |
| H162  | -4.497351388 | -6.314699124  | 5.547668555  |
| H163  | -4.507066647 | -1.825010592  | 2.566924457  |
| H164  | -5.325282922 | -3.298497816  | 7.382594085  |
| H165  | -6.603475638 | -0.857288712  | 6.855863245  |
| H166  | -0.268472166 | -3.324819379  | 4.092320849  |
| H167  | -0.202841297 | -2.333057686  | 2.616131536  |

|      |              |              |               |
|------|--------------|--------------|---------------|
| H168 | 1.276868434  | -2.609833379 | 3.552566829   |
| H169 | -1.199260427 | -1.043804469 | 4.486114999   |
| H170 | -4.754707921 | -4.221089586 | 9.410868478   |
| H171 | -2.089204789 | 2.056071536  | 4.897947509   |
| H172 | -2.283423516 | 0.192898711  | 8.964060513   |
| H173 | -2.487944986 | 3.778547129  | 8.887049261   |
| H174 | 0.150860819  | 0.202870487  | 2.801354926   |
| H175 | 1.599014135  | 0.029086395  | 3.801144949   |
| H176 | 8.882290540  | 2.292232948  | 5.022202617   |
| H177 | -3.000201460 | 3.547416308  | 5.199529993   |
| H178 | -3.276647882 | 4.488980934  | 7.458181440   |
| H179 | -1.223008800 | 3.567557598  | 5.286760180   |
| H180 | -1.514114154 | 4.629526073  | 7.665843902   |
| H181 | -3.076908811 | 2.019614732  | 7.198425952   |
| H182 | -0.047609845 | 2.477202759  | 7.229209315   |
| H183 | -1.645690552 | 0.253443715  | 6.275219952   |
| H184 | 0.218806411  | 0.990009472  | 4.389236661   |
| H185 | 1.282027609  | 4.558362719  | 0.471863456   |
| H186 | 0.484312100  | 5.372473099  | 1.851192786   |
| H187 | 2.627218048  | 5.827105468  | 2.169077874   |
| H188 | 2.982666615  | 5.356035383  | 4.767335596   |
| H189 | 4.704183014  | 4.525802524  | 1.784775156   |
| H190 | 6.447748497  | 2.771796760  | 1.695848556   |
| H191 | 6.003877311  | 2.113679101  | 5.937900659   |
| H192 | -1.388671696 | -2.277018593 | 6.718763617   |
| H193 | -0.805319576 | -5.426181273 | 7.255597509   |
| H194 | -0.417538308 | -4.675080110 | 8.820292504   |
| H195 | -2.795842161 | -4.092822130 | 7.136977537   |
| H196 | -4.330451667 | -2.610471546 | 10.037017131  |
| H197 | 4.222817793  | 3.836808492  | 6.020218232   |
| H198 | 1.420611397  | -1.691761581 | 5.921030001   |
| H199 | -2.171222772 | 1.366045339  | 11.494854140  |
| H200 | -2.237948764 | -0.384907266 | 11.178305003  |
| H201 | 0.479953680  | -0.060692236 | 10.881725903  |
| H202 | 10.974431519 | -6.527818610 | 5.259817409   |
| H203 | -1.315637087 | -6.104495015 | -3.697272886  |
| H204 | 1.105121320  | -8.790920891 | 1.288946045   |
| H205 | -1.702961137 | -6.787551763 | -8.130119916  |
| H206 | -0.222789460 | -5.911101562 | -8.597318378  |
| H207 | -2.649876726 | -4.830793988 | -7.056523002  |
| H208 | -2.597659092 | 0.393176236  | -9.998892334  |
| H209 | -2.719160598 | -4.910172894 | -9.594487097  |
| H210 | -3.204635494 | -2.331921524 | -2.324671629  |
| H211 | -3.794021653 | -4.998337543 | -0.938411432  |
| H212 | -1.767100946 | -1.600123136 | -8.505670826  |
| H213 | -4.620022128 | -0.931876799 | -8.923951705  |
| H214 | -0.444605756 | -3.035971995 | -9.460135046  |
| H215 | -0.970996700 | -5.735720603 | -2.008831965  |
| H216 | -1.142928518 | -3.915615010 | -7.170883422  |
| H217 | -0.548302758 | -4.473121954 | -10.261064920 |
| H218 | -6.551372458 | -3.741265415 | -2.882706239  |
| H219 | -3.391408594 | -2.373575265 | -0.568934785  |
| H220 | 1.343230933  | -5.704002506 | -7.162750138  |
| H221 | -2.180043157 | -4.290477545 | -0.802999793  |
| H222 | -3.928921425 | 2.875413559  | 2.646704531   |
| H223 | -2.636058294 | 0.731015637  | 1.256169431   |
| H224 | -8.207054800 | 0.929258673  | 3.328245699   |
| H225 | -7.219449923 | -0.044617396 | 0.681915666   |
| H226 | -7.030646172 | 4.161839324  | 1.709821633   |
| H227 | -8.599276615 | 8.990624552  | 3.113292322   |
| H228 | -7.314309759 | 5.564320214  | 4.475206790   |
| H229 | -9.139094820 | 5.597056630  | 2.343855288   |

|      |               |              |              |
|------|---------------|--------------|--------------|
| H230 | -6.425016161  | 6.983735964  | 1.890789858  |
| H231 | -10.768932453 | 9.494553847  | -0.490513779 |
| H232 | -3.246780580  | 4.288941474  | 0.725107165  |
| H233 | -4.738217417  | 3.915935897  | -0.136590762 |
| H234 | -9.946588952  | 10.599202781 | 1.661333593  |
| H235 | -8.379821153  | 5.686856122  | 0.751682438  |
| H236 | -6.014603113  | 1.892208761  | 0.884499472  |
| H237 | -7.006822559  | -0.349309169 | 3.128979746  |
| H238 | -10.022399502 | 1.437982919  | -0.818156960 |
| H239 | -2.063421150  | 1.132586528  | -2.929019361 |
| H240 | -10.220038534 | -0.294224563 | -0.487478195 |
| H241 | 10.087048444  | 3.300407627  | 3.230320528  |
| H242 | 8.521521480   | 3.443840276  | 2.785143804  |
| H243 | 1.805309181   | 6.101916129  | -1.524715860 |
| H244 | -0.717276527  | 6.017016560  | -0.056467106 |
| H245 | 1.762869726   | 8.509642792  | -0.449334788 |
| H246 | -3.413345242  | 3.210685256  | -2.115992729 |
| H247 | -4.967805236  | 3.935105183  | -3.492699905 |
| H248 | -4.678504448  | 5.249312076  | -2.646019862 |
| H249 | -5.147762025  | 1.109889719  | -4.303263491 |
| H250 | -6.907984279  | 0.933538307  | -4.547490163 |
| H251 | -0.166042418  | 12.140485562 | -3.013309995 |
| H252 | -1.598737260  | 13.209258871 | -2.922344755 |
| H253 | -0.496183292  | 9.858041263  | -3.459674310 |
| H254 | -2.083233870  | 9.134212020  | -3.385147836 |
| H255 | -2.441470171  | 8.641537554  | -6.679640241 |
| H256 | -2.006958898  | 4.089597597  | -6.101808965 |
| H257 | -7.157137619  | 8.626894405  | -1.679113882 |
| H258 | -2.995012144  | 8.688209235  | 1.048219668  |
| H259 | -4.166636283  | 7.381942263  | -3.878406084 |
| H260 | 1.505082779   | 4.723834023  | -3.862462083 |
| H261 | 2.787754495   | 6.782722221  | -3.558031203 |
| H262 | -0.984444866  | 4.361934364  | -3.620673865 |
| H263 | -8.150464112  | -0.736433592 | -1.551873035 |
| H264 | 3.882638070   | 9.489289054  | -4.890827500 |
| H265 | -6.015385496  | -1.271366983 | -3.320988263 |
| H266 | 1.244662292   | 5.459683806  | -5.448709766 |
| H267 | -3.254627144  | 7.022303136  | -0.753486143 |
| H268 | -6.933350228  | 2.979192121  | -3.154181708 |
| H269 | 3.488790100   | 10.181559493 | -3.304064369 |
| H270 | -1.807404816  | 7.122291419  | -7.211241718 |
| H271 | -4.174815985  | 8.588115252  | -5.113995301 |
| H272 | -4.962470580  | -3.847584367 | -3.388163383 |
| H273 | -5.646814900  | -3.387706559 | -0.807098654 |
| H274 | -6.856769786  | 10.361189613 | 0.063559037  |
| H275 | -5.487609252  | 1.218639379  | -1.840862412 |
| H276 | -0.004323395  | 7.349799789  | -4.412205342 |
| H277 | -1.005435015  | 5.488998816  | -6.455407575 |
| H278 | -0.159175504  | 3.488354765  | -4.899135743 |
| H279 | -3.171869644  | 5.378176925  | -4.354174248 |
| H280 | 0.955490240   | 9.804121445  | 2.006007095  |
| H281 | -0.448147060  | 10.307784474 | -0.967249096 |
| H282 | -0.302165168  | 13.229659192 | -0.831653238 |
| H283 | 2.325111364   | 10.202628542 | 0.947960269  |
| H284 | -2.398370786  | 11.011066898 | 0.602656805  |
| H285 | 5.167053090   | -3.450190490 | -8.698990656 |
| H286 | 5.146482181   | -4.883774032 | -7.652310566 |
| H287 | 8.169922915   | -5.268885525 | -4.096080984 |
| H288 | 5.681018497   | -5.558791803 | -9.880786440 |
| H289 | 4.137542924   | -6.047291214 | -9.627721645 |
| H290 | 5.770427526   | 5.113789756  | -0.754535530 |
| H291 | 5.639217122   | 7.963361652  | 0.432690932  |

|      |              |               |              |
|------|--------------|---------------|--------------|
| H292 | 5.179053071  | 7.855064924   | -3.861175068 |
| H293 | 4.262822638  | 5.934991878   | -0.250181713 |
| H294 | 6.866935250  | 8.482093876   | -0.513847265 |
| H295 | 5.456787403  | 2.728565724   | -6.404798249 |
| H296 | 6.352908988  | 6.977997488   | -2.233892965 |
| H297 | 5.011305168  | -6.222290314  | 5.591517414  |
| H298 | 7.007685083  | -7.399650372  | 3.585170038  |
| H299 | 3.962609994  | 0.980077399   | -6.796297049 |
| H300 | 4.746230764  | 0.485533999   | 3.506503791  |
| H301 | 0.989818340  | 0.999881451   | -8.672637579 |
| H302 | -0.999587856 | -2.720743280  | -4.163753506 |
| H303 | 0.683116868  | 1.587267369   | -7.038928120 |
| H304 | 3.937819187  | -3.928117535  | 4.641539822  |
| H305 | 2.456092383  | -0.322935653  | -6.401209570 |
| H306 | 3.997807758  | -4.565584323  | 3.000617111  |
| H307 | 4.699619633  | -6.702157917  | 3.909941700  |
| H308 | 6.456248783  | -4.929836232  | 3.195360548  |
| H309 | 6.434625175  | -4.344567926  | 4.868850910  |
| H310 | -4.776590281 | -1.264208312  | -6.620086708 |
| H311 | 5.740609800  | -8.623888822  | 6.013336665  |
| H312 | 4.989741017  | -11.297888561 | 4.695804625  |
| H313 | 0.400241874  | -0.670296600  | -3.836459716 |
| H314 | 6.213230220  | -10.750837182 | 7.290634352  |
| H315 | 4.690174595  | -11.239051378 | 6.937430350  |
| H316 | 5.250909056  | -2.692889944  | 2.259948166  |
| H317 | -0.311504134 | 1.467545337   | -4.807391236 |
| H318 | -3.082949110 | -2.597075793  | -5.509498133 |
| H319 | 7.843935965  | -9.802748476  | -0.265584425 |
| H320 | 7.033930144  | -7.870670882  | -2.948050070 |
| H321 | 6.609495142  | -8.060382965  | 0.905297603  |
| H322 | 7.176827895  | -10.605981630 | -1.401918847 |
| H323 | 5.482534017  | 2.018591506   | -9.312796376 |
| H324 | 6.471256479  | -4.975988420  | 0.311335502  |
| H325 | 2.504195435  | -7.196253921  | 1.514135418  |
| H326 | 3.735469257  | -2.396475447  | -7.271393731 |
| H327 | 3.136693791  | -9.101994013  | -0.099001071 |
| H328 | 3.787252991  | -7.320803989  | -6.560034360 |
| H329 | 2.735112552  | -5.742986651  | -4.864837629 |
| H330 | 6.623825489  | -11.736117729 | 5.201472397  |
| H331 | 5.090848716  | -0.486807855  | 2.082531846  |
| H332 | 8.424775084  | -5.600799202  | 1.594116924  |
| H333 | 7.254402133  | -3.637389258  | 0.394463745  |
| H334 | 8.923189908  | -6.383997966  | 3.815594860  |
| H335 | 4.399780573  | -2.216500423  | 5.718530898  |
| H336 | 3.204518564  | -11.925061327 | -2.699555872 |
| H337 | 3.725819098  | -8.421629682  | -3.025967693 |
| H338 | 5.005158398  | -8.491573219  | -1.797484636 |
| H339 | 1.963416502  | -8.706285224  | -1.386328430 |
| H340 | 1.731748211  | -2.532518304  | -5.907239965 |
| H341 | -2.406284288 | 1.604904786   | -6.200816453 |
| H342 | -4.609820275 | 0.498294517   | -6.822082314 |
| H343 | 2.091591748  | -5.623895105  | 0.766129255  |
| H344 | 8.524821855  | -7.147160696  | 1.629434101  |
| H345 | 7.318648493  | -9.018663277  | 1.911097396  |
| H346 | 4.035018904  | -0.556408285  | 5.483403525  |
| H347 | 6.168085054  | -8.002064740  | -5.887944102 |
| H348 | 6.721388012  | -6.263496121  | -2.286498644 |
| H349 | 0.938208139  | -3.408612016  | -7.249985776 |
| H350 | 4.415614647  | 3.840404880   | -7.321763242 |
| H351 | 7.273717768  | 0.498673661   | 4.521179364  |
| H352 | 7.454528747  | 0.774151913   | 2.773132890  |
| H353 | 9.513137850  | -6.686625209  | -5.383346757 |

|       |              |               |              |
|-------|--------------|---------------|--------------|
| H354  | 8.910356853  | -8.049415676  | -4.708542614 |
| H355  | 10.542035916 | -8.480333716  | -0.484327751 |
| H356  | 8.801579242  | -8.168695291  | -1.926755777 |
| H357  | 12.004013570 | -7.555811152  | -2.614040517 |
| H358  | 10.394537327 | -6.751357315  | -0.109223545 |
| H359  | 10.193083766 | 0.341935570   | 3.026318119  |
| H360  | -3.154833173 | 13.384605425  | 2.571179188  |
| H361  | 9.919719499  | -6.143121467  | 6.646258733  |
| H362  | 9.482927095  | -3.833080186  | 5.233524419  |
| H363  | -4.900968970 | 12.419532604  | 0.280084529  |
| H364  | -3.990053889 | 10.451302243  | 2.471323337  |
| H365  | -5.652948456 | 10.998749429  | 2.196729768  |
| H366  | -6.240761682 | 6.816842257   | -2.702768509 |
| H367  | 0.163626621  | -1.933190054  | 0.208254307  |
| H368  | -1.541197305 | -0.271570463  | -0.882832694 |
| Mo369 | 3.900226830  | -4.469720801  | -2.020692395 |
| N370  | 2.179904737  | -0.682795828  | 1.398040835  |
| N371  | 2.274957702  | -0.216864545  | 0.376384974  |
| N372  | -6.743598080 | -7.137809193  | -0.383093024 |
| N373  | -8.913001267 | -4.577429660  | 1.245225031  |
| N374  | -8.834271910 | -4.708527240  | 4.074209722  |
| N375  | -6.274589567 | -5.739876042  | 4.589410943  |
| N376  | -4.603841328 | -3.648200698  | 3.562505924  |
| N377  | -5.334850316 | -1.592330925  | 5.378144141  |
| N378  | -4.752780117 | -2.705137146  | 7.988598670  |
| N379  | -2.184071542 | -4.004508253  | 7.954768455  |
| N380  | -0.382958767 | -2.393767583  | 6.614646886  |
| N381  | -0.843008824 | 0.595006988   | 6.806564014  |
| N382  | -1.622361325 | 0.718704348   | 9.538605748  |
| N383  | 5.439578867  | -10.614858250 | 6.636270025  |
| N384  | 6.185064481  | -8.555026441  | 5.090954323  |
| N385  | 4.921251840  | -2.722768157  | 3.229297371  |
| N386  | 4.183346677  | -1.470082484  | 5.065577493  |
| N387  | 4.739637708  | -0.427241894  | 3.058766829  |
| N388  | 8.903543624  | -6.374405895  | 4.857875901  |
| N389  | -5.671670437 | -3.226264740  | -2.956194174 |
| N390  | -1.587430810 | -5.652506561  | -2.819032502 |
| N391  | -6.032289047 | -0.677751800  | -2.474288084 |
| N392  | -8.397202559 | 0.230984035   | -1.356930356 |
| N393  | -7.835789803 | 0.429062159   | 1.353137789  |
| N394  | -5.734196187 | 2.239779843   | 1.798044752  |
| N395  | -3.094379642 | 2.418803690   | -1.511305089 |
| N396  | -2.175195224 | 0.573414645   | -0.848365826 |
| N397  | -6.457008887 | 4.890946733   | 2.127347690  |
| N398  | -9.765278313 | 7.737930992   | 0.254595575  |
| N399  | -9.768336865 | 9.629659043   | 1.413011499  |
| N400  | 9.268329953  | 2.760499800   | 2.938888334  |
| N401  | 6.333341524  | 7.647999183   | -0.252689212 |
| N402  | 4.531506291  | 8.364266200   | -3.265436916 |
| N403  | 1.972945360  | 7.363600790   | -3.813929125 |
| N404  | -2.581861409 | 5.809474854   | -5.089638883 |
| N405  | -2.243726789 | 7.667180619   | -6.476204457 |
| N406  | -3.689866553 | 7.810042023   | -4.674816688 |
| N407  | 0.848348887  | 6.439973530   | -1.354368313 |
| N408  | 0.998185921  | 8.794553604   | 0.170577148  |
| N409  | -0.373896473 | 11.194036947  | -0.464700103 |
| N410  | -1.486853267 | 9.939628915   | -3.198721451 |
| N411  | -2.878896761 | 11.897750516  | 0.472441263  |
| N412  | 4.724883913  | -5.218466415  | -9.757690428 |
| N413  | 2.950699074  | -2.998670259  | -7.547891759 |
| N414  | 1.787025659  | -0.203947562  | -7.187699499 |
| N415  | 3.802624060  | 1.839841390   | -7.335347327 |

|      |              |               |              |
|------|--------------|---------------|--------------|
| N416 | -1.092112957 | -3.665953767  | -9.949173359 |
| N417 | -2.773069800 | -1.761144055  | -8.622797254 |
| N418 | 8.662303451  | -7.094109034  | -4.984918516 |
| N419 | 4.611234376  | -5.924034245  | -3.823492786 |
| N420 | 4.263750063  | -6.988365703  | -5.726404173 |
| N421 | 9.491300306  | -7.417608850  | -1.921778618 |
| N422 | 0.153854737  | 2.440522201   | -0.605878972 |
| N423 | 0.990135256  | 1.719215604   | -0.857867580 |
| O424 | -6.710762857 | -5.039682796  | 1.589445552  |
| O425 | -7.822503620 | -2.666707500  | 4.088781575  |
| O426 | -6.395600169 | -4.893985560  | 6.709996719  |
| O427 | -3.110774698 | -4.247389850  | 5.172990855  |
| O428 | -3.289444415 | -0.656591555  | 5.025083392  |
| O429 | -4.134447522 | -0.580933812  | 8.561529775  |
| O430 | -2.060410056 | -3.672484830  | 10.223846204 |
| O431 | 1.360347289  | -3.836141116  | 7.028870984  |
| O432 | 1.378431337  | 0.377403102   | 7.279410628  |
| O433 | -0.192514204 | 2.474980010   | 9.724630243  |
| O434 | -0.041958556 | 0.556730819   | 12.756235589 |
| O435 | 6.991438803  | -9.918977148  | 3.406373578  |
| O436 | 7.660504164  | -6.769946446  | 6.751529443  |
| O437 | 11.496041246 | -3.988691747  | 5.524100477  |
| O438 | -5.598352156 | -0.826173617  | -0.226376221 |
| O439 | -3.458167530 | -4.799338632  | -3.789278865 |
| O440 | -7.803681795 | 2.414618640   | -1.675356287 |
| O441 | -6.246172061 | 2.789760930   | -3.845820500 |
| O442 | -9.926069050 | 1.296152819   | 1.764428863  |
| O443 | -5.868565963 | 1.927411997   | 4.056437529  |
| O444 | -4.391579378 | 5.389298404   | 2.976160403  |
| O445 | -7.005687915 | 7.577202605   | 4.368074870  |
| O446 | 10.155055156 | 0.063439683   | 5.048806149  |
| O447 | 3.381784045  | 5.267467863   | 3.882197040  |
| O448 | 3.736015363  | 8.667470919   | -1.152687710 |
| O449 | 1.192990049  | 9.489620920   | -4.202698478 |
| O450 | -1.199936183 | 6.862288420   | -2.283720870 |
| O451 | -0.642673457 | 7.998646531   | 1.560520192  |
| O452 | 2.339004239  | 6.175533121   | 1.300610131  |
| O453 | 0.809698012  | 12.340353136  | 1.126820140  |
| O454 | -2.825682144 | 13.909508973  | -0.604484436 |
| O455 | -3.331511512 | 11.255529224  | -2.902383188 |
| O456 | -5.150459302 | 13.809855594  | 2.472760538  |
| O457 | -5.336451076 | 6.768238539   | -2.336792460 |
| O458 | 2.357360162  | -5.083091299  | -8.320973818 |
| O459 | 0.221050758  | -1.297264636  | -8.458389733 |
| O460 | 2.299694896  | 3.236643339   | -8.343579102 |
| O461 | 6.792042884  | 3.433771182   | -8.638435167 |
| O462 | -4.450639786 | -3.271904356  | -8.950953698 |
| O463 | -1.012997066 | -6.913887707  | -5.587454811 |
| O464 | 0.931056186  | -6.131620338  | -6.347513945 |
| O465 | -3.444233917 | 1.730773441   | -8.717158252 |
| O466 | 10.245143081 | -5.423516574  | -2.689116975 |
| O467 | 12.889228734 | -6.880369692  | -0.903834730 |
| O468 | -0.187788365 | -6.502891615  | -0.206090800 |
| O469 | 0.333857730  | -8.396166435  | 0.838800760  |
| O470 | 5.214818410  | -10.990852669 | -2.123958948 |
| O471 | 3.006493526  | -10.968860887 | -2.606872536 |
| O472 | 5.148173155  | -5.798853027  | -0.701966629 |
| O473 | 4.975523490  | -7.446628278  | 0.829050083  |
| O474 | 2.731000497  | -6.169539943  | -1.668507331 |
| O475 | 8.959429804  | -6.332392872  | 1.995908630  |
| O476 | 7.136561249  | -4.488629917  | 0.859718131  |
| O477 | -4.239529257 | 4.517326592   | -3.141191687 |

|                  |                                  |              |               |               |              |
|------------------|----------------------------------|--------------|---------------|---------------|--------------|
|                  | O478                             | 8.057035402  | -10.406586870 | -1.021656091  |              |
|                  | O479                             | 7.479298618  | -8.522380005  | 1.066383957   |              |
|                  | S480                             | 4.059223163  | 5.020901795   | -2.498204893  |              |
|                  | S481                             | 2.399592906  | 1.824546895   | -3.320841402  |              |
|                  | S482                             | 2.268267091  | -3.529896825  | -3.483939116  |              |
|                  | S483                             | 3.981716304  | 2.002546317   | -0.088785346  |              |
|                  | S484                             | -0.013139051 | -1.998654705  | -1.136245199  |              |
|                  | S485                             | 4.380857172  | -0.958988333  | -5.318614105  |              |
|                  | S486                             | 3.335434005  | -3.394273413  | 0.041325795   |              |
|                  | S487                             | 6.058209181  | 1.498344581   | -2.888173973  |              |
|                  | S488                             | 5.860010844  | -3.257044972  | -2.640738531  |              |
|                  | S489                             | 6.296987778  | -0.942931820  | 0.196837613   |              |
| <b>11, 35(1)</b> | <b>bm12unh2b2n2x6n2n35.car_2</b> |              |               |               |              |
| Fe1              | 2.93                             | C1           | -7.342406067  | -5.882866240  | 0.923213614  |
| Fe2              | -0.84                            | C2           | -7.477449349  | -7.044772884  | -0.065921274 |
| Fe3              | -2.44                            | C3           | -8.488631763  | -4.041455366  | 2.076912689  |
| Fe4              | 2.74                             | C4           | -8.053715620  | -4.317080375  | 3.514783974  |
| Fe5              | -2.66                            | C5           | -7.905128349  | -5.907166379  | 5.358936521  |
| Fe6              | -1.01                            | C6           | -6.382168476  | -6.020850828  | 5.500370001  |
| Fe7              | 2.06                             | C7           | -4.256745244  | -6.475721115  | 4.371859857  |
|                  |                                  | C8           | -3.618853489  | -5.083759183  | 4.296906748  |
|                  |                                  | C9           | -3.740457349  | -2.809364619  | 3.427640981  |
|                  |                                  | C10          | -3.895004812  | -2.059045311  | 4.759974542  |
|                  |                                  | C11          | -5.218774248  | -1.667792581  | 6.755411062  |
|                  |                                  | C12          | -4.330837720  | -2.227122174  | 7.875989592  |
|                  |                                  | C13          | -3.590722828  | -4.226917516  | 9.079845419  |
|                  |                                  | C14          | -2.080021034  | -4.470159748  | 8.963558907  |
|                  |                                  | C15          | -0.204057906  | -5.038484247  | 7.474506585  |
|                  |                                  | C16          | 0.678265881   | -3.971041939  | 6.819221706  |
|                  |                                  | C17          | 0.685135177   | -1.717589428  | 5.757544692  |
|                  |                                  | C18          | 0.608995309   | -0.474034886  | 6.661520125  |
|                  |                                  | C19          | 0.122421386   | -1.490137967  | 4.337317742  |
|                  |                                  | C20          | 0.570930530   | -0.136376402  | 3.785101262  |
|                  |                                  | C21          | 0.518957581   | -2.653828653  | 3.421657813  |
|                  |                                  | C22          | -0.792786090  | 1.301747581   | 7.617937851  |
|                  |                                  | C23          | -0.650276391  | 1.028004558   | 9.124584775  |
|                  |                                  | C24          | -2.120880507  | 2.011878438   | 7.256542701  |
|                  |                                  | C25          | -2.351417597  | 3.242136635   | 8.143144890  |
|                  |                                  | C26          | -2.137774122  | 2.417254428   | 5.776563120  |
|                  |                                  | C27          | -1.252679398  | -0.357006834  | 11.020915092 |
|                  |                                  | C28          | 0.169368125   | -0.471162728  | 11.534019651 |
|                  |                                  | C29          | 6.713616417   | -10.867926653 | 4.185947443  |
|                  |                                  | C30          | 7.187999782   | -9.586486232  | 3.500574601  |
|                  |                                  | C31          | 7.295233898   | -7.105622642  | 3.807562821  |
|                  |                                  | C32          | 8.450557092   | -6.610274788  | 4.697763794  |
|                  |                                  | C33          | 6.051634690   | -6.205543791  | 3.918708772  |
|                  |                                  | C34          | 6.304030615   | -4.747923379  | 3.524129086  |
|                  |                                  | C35          | 4.983816811   | -4.004029780  | 3.306711081  |
|                  |                                  | C36          | 4.850635697   | -1.511043418  | 3.519427540  |
|                  |                                  | C37          | 10.690615747  | -5.618859246  | 4.726654526  |
|                  |                                  | C38          | 10.846663154  | -4.114160225  | 4.686822306  |
|                  |                                  | C39          | -5.050302587  | -2.977018656  | -1.629962659 |
|                  |                                  | C40          | -5.569654843  | -1.590741472  | -1.199530114 |
|                  |                                  | C41          | -3.510012369  | -2.968109954  | -1.574019845 |
|                  |                                  | C42          | -2.833404409  | -4.352523093  | -1.615000039 |
|                  |                                  | C43          | -2.521774114  | -4.888924464  | -3.009377873 |
|                  |                                  | C44          | -6.305788290  | 0.600329966   | -2.111902199 |
|                  |                                  | C45          | -7.558778257  | 0.896728402   | -1.283025400 |
|                  |                                  | C46          | -6.343047114  | 1.242788504   | -3.527117213 |
|                  |                                  | C47          | -9.499689214  | -0.057640694  | -0.135012138 |
|                  |                                  | C48          | -9.070181632  | 0.091449361   | 1.332203312  |

|      |               |              |              |
|------|---------------|--------------|--------------|
| C49  | -7.257830726  | -0.088966719 | 2.983407702  |
| C50  | -6.219723329  | 1.009404434  | 3.224848186  |
| C51  | -4.796570557  | 2.779876690  | 2.295155760  |
| C52  | -5.372459348  | 4.049710073  | 2.961983449  |
| C53  | -4.219891940  | 3.219669368  | 0.938676729  |
| C54  | -3.508309762  | 2.187214999  | 0.117843453  |
| C55  | -2.820234924  | 1.041962725  | 0.461630165  |
| C56  | -2.705229724  | 1.348464890  | -1.723185136 |
| C57  | -7.338763631  | 5.539567372  | 3.050565287  |
| C58  | -7.347923571  | 5.708513387  | 4.567055521  |
| C59  | -8.781959786  | 5.491589802  | 2.499284781  |
| C60  | -9.466150157  | 6.816436069  | 2.324644834  |
| C61  | -9.454800294  | 7.952088059  | 3.110483930  |
| C62  | -10.743423277 | 8.256060689  | 1.334505704  |
| C63  | 8.927615573   | 2.191332127  | 3.795668399  |
| C64  | 9.971003966   | 1.100394897  | 3.648473410  |
| C65  | 7.548481971   | 1.525920174  | 3.553932437  |
| C66  | 6.396304909   | 2.492357598  | 3.700717240  |
| C67  | 5.792331057   | 2.727905722  | 4.949397110  |
| C68  | 5.894412414   | 3.186916299  | 2.584524633  |
| C69  | 4.722751597   | 3.620930281  | 5.083341714  |
| C70  | 4.837669863   | 4.089289480  | 2.704385938  |
| C71  | 4.249467289   | 4.302233672  | 3.953912589  |
| C72  | 5.130989733   | 7.648202569  | -1.161269699 |
| C73  | 3.941316596   | 8.545422001  | -1.526335643 |
| C74  | 4.652357555   | 6.197367358  | -0.987327908 |
| C75  | 2.763031140   | 9.735681832  | -3.321541886 |
| C76  | 1.386178780   | 9.073635373  | -3.396740892 |
| C77  | 0.077561922   | 6.992345673  | -3.375366502 |
| C78  | -0.516749814  | 6.841482103  | -1.961022149 |
| C79  | 0.266253268   | 5.638341379  | -4.082233203 |
| C80  | -0.962002473  | 4.726932844  | -4.190566745 |
| C81  | -2.073224986  | 5.164539429  | -5.164364798 |
| C82  | -3.525511693  | 7.160347495  | -4.774527984 |
| C83  | -0.146734673  | 6.435972822  | 0.421316528  |
| C84  | -0.335802597  | 7.770620394  | 1.171336438  |
| C85  | 0.728914294   | 5.512935158  | 1.272067179  |
| C86  | 0.597366373   | 9.985843993  | 1.626868271  |
| C87  | -0.208448161  | 11.246568452 | 1.321877552  |
| C88  | -1.860002466  | 12.356741759 | -0.127022485 |
| C89  | -3.189356312  | 12.630439700 | 0.609215415  |
| C90  | -2.083168305  | 12.323150162 | -1.656692351 |
| C91  | -2.967978113  | 11.153322562 | -2.073192674 |
| C92  | -4.968387305  | 11.702865827 | 2.027949793  |
| C93  | -4.965338479  | 12.733471179 | 3.150188947  |
| C94  | -5.362611199  | 10.311451250 | 2.596750418  |
| C95  | -5.501470191  | 9.257715346  | 1.519429320  |
| C96  | -6.698991157  | 9.127487349  | 0.798938872  |
| C97  | -4.433683982  | 8.410883769  | 1.177287284  |
| C98  | -6.831149868  | 8.191194077  | -0.229934657 |
| C99  | -4.541010222  | 7.484960417  | 0.134150146  |
| C100 | -5.741961907  | 7.384672530  | -0.566343888 |
| C101 | 4.545018798   | -3.495813485 | -8.980913164 |
| C102 | 3.107355998   | -3.399182623 | -8.496360960 |
| C103 | 1.524592082   | -2.036370551 | -7.144045847 |
| C104 | 0.919012212   | -0.731899586 | -7.671838607 |
| C105 | 1.067806292   | 1.710147418  | -7.637249608 |
| C106 | 2.115115643   | 2.810003799  | -7.778225773 |
| C107 | 4.374532838   | 3.632295253  | -7.343144746 |
| C108 | 5.227508817   | 3.675484972  | -8.594218697 |
| C109 | -2.289391248  | -3.612998933 | -9.208591062 |
| C110 | -3.406315753  | -2.598567512 | -8.929504386 |



|       |              |              |              |
|-------|--------------|--------------|--------------|
| C111  | -1.799444679 | -4.241482110 | -7.883751985 |
| C112  | -0.984968291 | -5.521323655 | -8.152524105 |
| C113  | -0.258299796 | -5.975466886 | -6.906999856 |
| C114  | -3.990446231 | -0.321918835 | -8.239213339 |
| C115  | -3.626273785 | 0.999079092  | -8.888805930 |
| C116  | -4.283663399 | -0.233345749 | -6.720779875 |
| C117  | -3.040282979 | -0.268605511 | -5.865814772 |
| C118  | -2.279463510 | 0.888405941  | -5.622697609 |
| C119  | -2.585317277 | -1.488781883 | -5.339280739 |
| C120  | -1.093140985 | 0.816936697  | -4.883447827 |
| C121  | -1.396496830 | -1.560337411 | -4.606267512 |
| C122  | -0.640865576 | -0.405872422 | -4.379558461 |
| C123  | 8.405127724  | -5.502649122 | -4.570403684 |
| C124  | 9.567794305  | -5.506117000 | -3.563777412 |
| C125  | 7.109948295  | -6.063061353 | -3.959587678 |
| C126  | 5.870588178  | -5.901791267 | -4.787508085 |
| C127  | 5.595665919  | -6.461043671 | -6.020250575 |
| C128  | 3.801925409  | -5.391423116 | -5.277464371 |
| C129  | 10.911885168 | -6.697651430 | -1.924893577 |
| C130  | 12.214072854 | -6.264331954 | -2.560714838 |
| C131  | 1.122632061  | -7.122995481 | -0.112481126 |
| C132  | 2.514934120  | -6.600746153 | 0.121686943  |
| C133  | 3.452213161  | -6.727226945 | -1.144132121 |
| C134  | 3.437415168  | -8.192343682 | -1.666174929 |
| C135  | 4.458102266  | -8.421544783 | -2.793242058 |
| C136  | 4.692384066  | -9.867327359 | -3.129487181 |
| C137  | 4.901607959  | -6.429235452 | -0.648765405 |
| C138  | 3.709505099  | -0.355559422 | -2.177066924 |
| Fe139 | 4.059012670  | -1.654421213 | -3.698177067 |
| Fe140 | 2.503945944  | 1.204030788  | -1.782448975 |
| Fe141 | 5.042262480  | 0.919455708  | -1.362806381 |
| Fe142 | 4.076942157  | 0.884710287  | -3.765394081 |
| Fe143 | 4.090470529  | 3.232114395  | -2.371501862 |
| Fe144 | 4.897584463  | -1.648880809 | -1.290075849 |
| Fe145 | 2.294766077  | -1.519220903 | -1.289280761 |
| H146  | -5.551909573 | -7.695488198 | 0.093950341  |
| H147  | -5.832417244 | -6.827748790 | -1.260706356 |
| H148  | -9.327247617 | -5.408330925 | 0.663562923  |
| H149  | -8.174363300 | -6.761006459 | -0.869796919 |
| H150  | -7.967287445 | -7.864648529 | 0.489084151  |
| H151  | -7.808364892 | -3.267931490 | 1.693028767  |
| H152  | -8.838412458 | -6.214564588 | 3.441738987  |
| H153  | -9.503770244 | -3.622524169 | 2.094129619  |
| H154  | -8.358510781 | -6.871720007 | 5.622982811  |
| H155  | -6.206111843 | -6.514613116 | 3.513576445  |
| H156  | -8.236278978 | -5.158975932 | 6.090881320  |
| H157  | -2.671906577 | -2.787609096 | 3.175439165  |
| H158  | -4.996846128 | -4.473767484 | 2.882998098  |
| H159  | -3.936837367 | -7.071489094 | 3.505879707  |
| H160  | -5.005742870 | -0.594857343 | 6.671004514  |
| H161  | -5.768503700 | -2.887051609 | 5.068561757  |
| H162  | -3.872778619 | -6.952435545 | 5.281809693  |
| H163  | -4.291740715 | -2.283402550 | 2.635078876  |
| H164  | -4.801923828 | -4.165505337 | 7.322095534  |
| H165  | -6.271415447 | -1.795316191 | 7.045659568  |
| H166  | 0.193522555  | -3.617896985 | 3.839826422  |
| H167  | 0.053261859  | -2.540594805 | 2.431216256  |
| H168  | 1.608640733  | -2.688532281 | 3.268384145  |
| H169  | -0.975831987 | -1.477581691 | 4.417214678  |
| H170  | -4.066786475 | -5.205548333 | 9.239594255  |
| H171  | -2.050175208 | 1.553997900  | 5.102171730  |
| H172  | -1.958391658 | -0.585523539 | 9.023603933  |

|      |               |              |               |
|------|---------------|--------------|---------------|
| H173 | -2.416545354  | 2.984500778  | 9.209935651   |
| H174 | 0.182905377   | 0.006827193  | 2.768004392   |
| H175 | 1.665301804   | -0.069877225 | 3.724087438   |
| H176 | 8.954517996   | 2.538173875  | 4.847265720   |
| H177 | -3.082888207  | 2.924837202  | 5.535117044   |
| H178 | -3.289739284  | 3.736458452  | 7.850690128   |
| H179 | -1.311145140  | 3.113716450  | 5.559805558   |
| H180 | -1.531416566  | 3.967804025  | 8.019121866   |
| H181 | -2.944743130  | 1.297158829  | 7.434738552   |
| H182 | 0.045217995   | 1.975102921  | 7.377574743   |
| H183 | -1.429028932  | -0.291748281 | 6.318162530   |
| H184 | 0.208057278   | 0.699596030  | 4.400139876   |
| H185 | 0.870494425   | 4.559173815  | 0.734296334   |
| H186 | 0.179374846   | 5.312411974  | 2.205180624   |
| H187 | 2.336675900   | 5.777523778  | 2.370024105   |
| H188 | 2.821698460   | 5.202616363  | 4.913324738   |
| H189 | 4.442746699   | 4.596076625  | 1.823607078   |
| H190 | 6.314702294   | 2.994370251  | 1.594316126   |
| H191 | 6.154137623   | 2.197832947  | 5.834869742   |
| H192 | -0.972130854  | -2.809433060 | 6.559954359   |
| H193 | -0.159237379  | -5.930613415 | 6.832019614   |
| H194 | 0.254152115   | -5.291144282 | 8.439733436   |
| H195 | -2.231625985  | -4.736879805 | 6.909357947   |
| H196 | -3.738202738  | -3.623011694 | 9.984368548   |
| H197 | 4.254007612   | 3.780474829  | 6.058196569   |
| H198 | 1.751808691   | -1.971125734 | 5.699279390   |
| H199 | -1.789518471  | 0.386257523  | 11.633581985  |
| H200 | -1.732603056  | -1.336175205 | 11.178415283  |
| H201 | 0.922155771   | -0.785911570 | 10.772600899  |
| H202 | 11.604850962  | -6.090482464 | 4.336654638   |
| H203 | -1.103871340  | -5.938876427 | -4.052653722  |
| H204 | 1.695441187   | -8.778889760 | 0.696345256   |
| H205 | -1.666758150  | -6.324953535 | -8.466158462  |
| H206 | -0.264168294  | -5.345510779 | -8.964777359  |
| H207 | -2.655210794  | -4.491074586 | -7.237490481  |
| H208 | -3.090998177  | 0.897176148  | -9.863169843  |
| H209 | -2.796161729  | -4.404943929 | -9.781788856  |
| H210 | -3.132870935  | -2.339745970 | -2.394804270  |
| H211 | -3.472854600  | -5.102551416 | -1.116473281  |
| H212 | -2.017566241  | -1.126686232 | -8.479353324  |
| H213 | -4.929317334  | -0.628325927 | -8.742916730  |
| H214 | -0.641079079  | -2.403997893 | -9.566917335  |
| H215 | -0.695421742  | -5.644077103 | -2.362019611  |
| H216 | -1.195936464  | -3.499699031 | -7.338533869  |
| H217 | -0.664006804  | -3.794232507 | -10.449759924 |
| H218 | -6.422060794  | -3.833300031 | -2.920754280  |
| H219 | -3.211923952  | -2.478911477 | -0.636207591  |
| H220 | 1.366836669   | -5.100455943 | -7.603116246  |
| H221 | -1.899428286  | -4.303507674 | -1.038188146  |
| H222 | -3.997791695  | 2.419182283  | 2.959878000   |
| H223 | -2.638928761  | 0.556429004  | 1.414064547   |
| H224 | -8.100506989  | 0.113515202  | 3.657815319   |
| H225 | -7.138478639  | -0.562444888 | 0.905236082   |
| H226 | -7.214893323  | 3.572420935  | 2.204400957   |
| H227 | -8.940216358  | 8.198067714  | 4.032295480   |
| H228 | -7.487097172  | 4.749359953  | 5.124115669   |
| H229 | -9.386742739  | 4.814017355  | 3.128496975   |
| H230 | -6.786030288  | 6.382393916  | 2.607427297   |
| H231 | -11.409445265 | 8.757309435  | 0.636466572   |
| H232 | -3.535162639  | 4.057259155  | 1.149182324   |
| H233 | -5.040278012  | 3.631308434  | 0.328851174   |
| H234 | -10.469912259 | 9.804491568  | 2.768355597   |

|      |               |              |               |
|------|---------------|--------------|---------------|
| H235 | -8.740758901  | 5.027378910  | 1.501555326   |
| H236 | -6.140290642  | 1.490757239  | 1.213823202   |
| H237 | -6.809339445  | -1.036935026 | 3.315638845   |
| H238 | -10.154982957 | 0.797350181  | -0.351868687  |
| H239 | -2.434283219  | 1.174073860  | -2.761777035  |
| H240 | -10.108131507 | -0.968457209 | -0.219240538  |
| H241 | 9.971756046   | 3.813299834  | 3.104843148   |
| H242 | 8.375362229   | 3.862293009  | 2.750104259   |
| H243 | 1.336723156   | 6.393094753  | -1.144715368  |
| H244 | -1.146933856  | 5.984448828  | 0.359723630   |
| H245 | 1.176578027   | 8.652054659  | 0.092429973   |
| H246 | -4.172424354  | 3.662828933  | -2.144920959  |
| H247 | -5.911327117  | 3.160309603  | -3.203984969  |
| H248 | -5.094721184  | 4.956104745  | -2.038078228  |
| H249 | -5.353717368  | 1.056589879  | -3.978761625  |
| H250 | -7.103839870  | 0.732391299  | -4.138877321  |
| H251 | -1.099809418  | 12.283260931 | -2.148298152  |
| H252 | -2.582378501  | 13.257916952 | -1.942808070  |
| H253 | -1.317031636  | 10.004308008 | -2.699100305  |
| H254 | -2.855396782  | 9.186946252  | -2.624438978  |
| H255 | -3.330274164  | 8.814947119  | -5.957217983  |
| H256 | -2.530104697  | 4.276553382  | -5.625981527  |
| H257 | -7.778128652  | 8.096566916  | -0.765879735  |
| H258 | -3.493766628  | 8.450238361  | 1.735208968   |
| H259 | -4.820372018  | 7.279354304  | -3.172705051  |
| H260 | 1.058013222   | 5.072216098  | -3.565755935  |
| H261 | 2.212796474   | 7.180933685  | -3.232729721  |
| H262 | -1.398569438  | 4.529253280  | -3.198800144  |
| H263 | -8.198775379  | -1.035223223 | -1.532391333  |
| H264 | 3.017464354   | 10.094521178 | -4.327890342  |
| H265 | -5.971612740  | -1.333063757 | -3.128832414  |
| H266 | 0.650423587   | 5.848372467  | -5.094225171  |
| H267 | -3.686297188  | 6.870329862  | -0.151030927  |
| H268 | 2.643693871   | 10.613328135 | -2.671014712  |
| H269 | -2.607106328  | 7.392107105  | -6.599497474  |
| H270 | -4.938433486  | 8.567861921  | -4.319252897  |
| H271 | -4.839101040  | -3.891438342 | -3.458912608  |
| H272 | -5.404332545  | -3.675760741 | -0.847578084  |
| H273 | -7.552304570  | 9.762298267  | 1.050344477   |
| H274 | -5.485287656  | 1.076966596  | -1.551895441  |
| H275 | -0.649394973  | 7.610773959  | -3.919521735  |
| H276 | -1.643918920  | 5.758314982  | -5.982366600  |
| H277 | -0.582329281  | 3.759450031  | -4.546303937  |
| H278 | -3.691347633  | 5.387832869  | -3.790283527  |
| H279 | 0.346414171   | 9.698254647  | 2.659004207   |
| H280 | -1.182147697  | 10.314117212 | -0.228508641  |
| H281 | -1.224553882  | 13.223943292 | 0.106066320   |
| H282 | 1.655824983   | 10.279790168 | 1.607813921   |
| H283 | -3.133193627  | 10.762314269 | 1.426890822   |
| H284 | 4.967735752   | -2.488533550 | -9.108825336  |
| H285 | 5.108478054   | -3.977898065 | -8.155667220  |
| H286 | 8.247302265   | -4.444542077 | -4.824659174  |
| H287 | 5.578291212   | -4.484735979 | -10.432319946 |
| H288 | 4.085133611   | -5.095993195 | -10.150137965 |
| H289 | 5.521941385   | 5.584596995  | -0.717326274  |
| H290 | 5.091870738   | 8.228679513  | 0.791780873   |
| H291 | 4.500950885   | 8.501983564  | -3.500295944  |
| H292 | 3.919722053   | 6.148873652  | -0.168326180  |
| H293 | 6.208649562   | 9.022554464  | -0.096500224  |
| H294 | 5.031560119   | 3.507179057  | -6.468383302  |
| H295 | 5.867716541   | 7.675367539  | -1.979095625  |
| H296 | 5.663503075   | -6.261736746 | 4.949154265   |

|      |              |               |              |
|------|--------------|---------------|--------------|
| H297 | 7.619707690  | -7.139874864  | 2.760675912  |
| H298 | 3.624274253  | 1.697023491   | -6.873713379 |
| H299 | 4.775542130  | 0.533869642   | 3.384469106  |
| H300 | 0.572586677  | 1.603091782   | -8.611444446 |
| H301 | -1.057388397 | -2.516240790  | -4.201767716 |
| H302 | 0.306911119  | 2.098082803   | -6.940328400 |
| H303 | 4.364759924  | -4.008963677  | 4.214663968  |
| H304 | 2.211602480  | 0.282018288   | -6.462874177 |
| H305 | 4.392891488  | -4.512226652  | 2.528405833  |
| H306 | 5.289286096  | -6.643650106  | 3.254317299  |
| H307 | 6.876097208  | -4.698607341  | 2.585481831  |
| H308 | 6.897881847  | -4.232182223  | 4.296698365  |
| H309 | -4.933815476 | -1.080298139  | -6.457759359 |
| H310 | 6.552168366  | -8.630324364  | 5.135434564  |
| H311 | 5.819284480  | -11.194094774 | 3.633197632  |
| H312 | 0.282200578  | -0.454143699  | -3.799013167 |
| H313 | 7.181057050  | -10.845693621 | 6.191685451  |
| H314 | 5.657608267  | -11.362163102 | 5.882470964  |
| H315 | 5.430475349  | -2.504646011  | 1.868445893  |
| H316 | -0.498728527 | 1.711643962   | -4.688992218 |
| H317 | -3.173618106 | -2.396413740  | -5.492348279 |
| H318 | 8.408058782  | -9.191103608  | -1.297109478 |
| H319 | 7.254636387  | -7.139789644  | -3.758423406 |
| H320 | 7.117207232  | -7.636135572  | 0.086352163  |
| H321 | 7.738864556  | -9.961114976  | -2.456245233 |
| H322 | 4.960836584  | 2.928681392   | -9.380801735 |
| H323 | 6.766055323  | -4.534588433  | -0.233819070 |
| H324 | 2.991398003  | -7.115298677  | 0.969505197  |
| H325 | 3.574087457  | -1.679254497  | -7.480082542 |
| H326 | 3.664755212  | -8.866357241  | -0.825420477 |
| H327 | 3.761274781  | -6.408937171  | -7.130242066 |
| H328 | 2.788111047  | -5.013960122  | -5.229783272 |
| H329 | 7.492189451  | -11.627932868 | 4.003861447  |
| H330 | 5.193343220  | -0.298081597  | 1.884642762  |
| H331 | 8.835954662  | -5.092719493  | 0.861276150  |
| H332 | 7.439703891  | -3.139442030  | -0.139862627 |
| H333 | 9.480291750  | -6.020757621  | 2.987280720  |
| H334 | 4.681425046  | -2.366147332  | 5.380983136  |
| H335 | 3.808581874  | -11.447018460 | -3.679852121 |
| H336 | 4.111876986  | -7.903847746  | -3.700534454 |
| H337 | 5.434365412  | -8.003627690  | -2.523790150 |
| H338 | 2.427255239  | -8.423964410  | -2.033640777 |
| H339 | 1.664160958  | -1.992972381  | -6.051498959 |
| H340 | -2.620640215 | 1.845418466   | -6.026224035 |
| H341 | -4.851842115 | 0.694400921   | -6.554133820 |
| H342 | 2.443498306  | -5.526871070  | 0.339730028  |
| H343 | 9.006787836  | -6.630301376  | 0.765961527  |
| H344 | 7.968568257  | -8.608927249  | 0.948768014  |
| H345 | 4.293025604  | -0.697310521  | 5.313193317  |
| H346 | 6.208601109  | -7.052624050  | -6.689285735 |
| H347 | 6.938317062  | -5.587206630  | -2.985584189 |
| H348 | 0.840760238  | -2.851851816  | -7.389037614 |
| H349 | 3.868262516  | 4.605405268   | -7.241917496 |
| H350 | 7.445002143  | 0.700720215   | 4.275144530  |
| H351 | 7.541512204  | 1.087735966   | 2.542893373  |
| H352 | 9.592601170  | -5.758558623  | -6.224527026 |
| H353 | 9.052287508  | -7.168326569  | -5.596068958 |
| H354 | 11.038486026 | -7.745576835  | -1.609401652 |
| H355 | 9.183664348  | -7.462663495  | -2.908120474 |
| H356 | 12.274256508 | -6.423758381  | -3.663967740 |
| H357 | 10.720473302 | -6.095455091  | -1.021639705 |
| H358 | 10.285010870 | 0.908652878   | 2.594197904  |

|       |               |               |               |
|-------|---------------|---------------|---------------|
| H359  | -3.959168027  | 12.961641998  | 3.576247485   |
| H360  | 10.583873184  | -5.905111366  | 5.786994295   |
| H361  | 9.900092208   | -3.542258256  | 4.526544287   |
| H362  | -5.723138720  | 12.019374882  | 1.289960341   |
| H363  | -4.612022292  | 9.998119875   | 3.339779352   |
| H364  | -6.315184692  | 10.441780303  | 3.131276396   |
| H365  | -6.743024923  | 6.422464216   | -1.925827258  |
| H366  | -0.090941590  | -1.708445252  | 0.259864031   |
| H367  | -1.670060112  | -0.269416755  | -0.829968334  |
| Mo368 | 4.126106874   | -4.044009827  | -2.357355510  |
| N369  | 2.258637602   | -0.137450576  | 1.288130817   |
| N370  | 2.248387389   | -0.612916147  | 0.264133694   |
| N371  | -6.240022205  | -7.537502806  | -0.647166477  |
| N372  | -8.492940291  | -5.212500476  | 1.211372408   |
| N373  | -8.343987482  | -5.541125010  | 4.021726902   |
| N374  | -5.711226311  | -6.451837563  | 4.403212451   |
| N375  | -4.223375735  | -4.182884112  | 3.482962118   |
| N376  | -5.018999797  | -2.319959435  | 5.472092086   |
| N377  | -4.247458972  | -3.582024114  | 7.954098054   |
| N378  | -1.591428441  | -4.672470050  | 7.707783165   |
| N379  | 0.035789475   | -2.845233270  | 6.421139448   |
| N380  | -0.628773822  | 0.073374510   | 6.838598185   |
| N381  | -1.301226816  | -0.061573320  | 9.603995384   |
| N382  | 6.364034338   | -10.681616074 | 5.599499291   |
| N383  | 6.955082784   | -8.464642586  | 4.206683214   |
| N384  | 5.185676714   | -2.625751045  | 2.856238825   |
| N385  | 4.433814087   | -1.566533543  | 4.807760983   |
| N386  | 4.877384873   | -0.340568743  | 2.878404865   |
| N387  | 9.510730867   | -6.093246214  | 4.027087381   |
| N388  | -5.544718943  | -3.311167665  | -2.971714108  |
| N389  | -1.354822445  | -5.552538212  | -3.137283775  |
| N390  | -6.012739265  | -0.826186476  | -2.229707431  |
| N391  | -8.424450710  | -0.140487316  | -1.104365543  |
| N392  | -7.778231419  | -0.218968168  | 1.634986511   |
| N393  | -5.798715184  | 1.729395948   | 2.144356085   |
| N394  | -3.428561094  | 2.365751727   | -1.254962168  |
| N395  | -2.335196438  | 0.519043433   | -0.719863775  |
| N396  | -6.689088561  | 4.280185965   | 2.711947334   |
| N397  | -10.275312805 | 7.019831628   | 1.218251247   |
| N398  | -10.268562131 | 8.856980751   | 2.461444571   |
| N399  | 9.183392917   | 3.235901272   | 2.803462452   |
| N400  | 5.804192987   | 8.095494646   | 0.066329011   |
| N401  | 3.847829429   | 8.907979791   | -2.835008305  |
| N402  | 1.343995689   | 7.722881714   | -3.376641157  |
| N403  | -3.163577211  | 5.908183480   | -4.521288029  |
| N404  | -2.988047606  | 7.873225275   | -5.791379913  |
| N405  | -4.396452910  | 7.790411595   | -3.951812178  |
| N406  | 0.351983039   | 6.583768810   | -0.942823062  |
| N407  | 0.416479462   | 8.832146500   | 0.755552287   |
| N408  | -1.147265819  | 11.166895877  | 0.332851235   |
| N409  | -2.302196175  | 10.016137821  | -2.409417153  |
| N410  | -3.663216487  | 11.629389291  | 1.389201561   |
| N411  | 4.606765624   | -4.220825060  | -10.254077696 |
| N412  | 2.810640789   | -2.301303660  | -7.778107618  |
| N413  | 1.515628430   | 0.392647787   | -7.221171739  |
| N414  | 3.382769081   | 2.570428292   | -7.353850389  |
| N415  | -1.255498891  | -3.044926905  | -10.084098348 |
| N416  | -3.013506748  | -1.336033521  | -8.602878768  |
| N417  | 8.769334241   | -6.207815498  | -5.813948544  |
| N418  | 4.733674408   | -5.230491834  | -4.344144208  |
| N419  | 4.287759852   | -6.128247785  | -6.307643710  |
| N420  | 9.805340310   | -6.653868485  | -2.868311619  |

|      |              |               |              |
|------|--------------|---------------|--------------|
| N421 | 0.067042582  | 2.244544525   | -0.540794263 |
| N422 | 0.949135897  | 1.744079347   | -1.046859631 |
| O423 | -6.266629760 | -5.605690636  | 1.486658785  |
| O424 | -7.467717640 | -3.445079557  | 4.176302160  |
| O425 | -5.824949908 | -5.757414835  | 6.579405215  |
| O426 | -2.609683730 | -4.802669521  | 4.963327750  |
| O427 | -3.032364383 | -1.259645723  | 5.154246178  |
| O428 | -3.763023263 | -1.471762134  | 8.683268206  |
| O429 | -1.388470617 | -4.519960818  | 9.989791563  |
| O430 | 1.891429127  | -4.181204158  | 6.667517096  |
| O431 | 1.624685094  | -0.004465306  | 7.196439342  |
| O432 | 0.023045907  | 1.763388715   | 9.865073759  |
| O433 | 0.474235799  | -0.303147567  | 12.706180175 |
| O434 | 7.715770898  | -9.648602228  | 2.370013118  |
| O435 | 8.386131324  | -6.706366323  | 5.936015140  |
| O436 | 11.917010602 | -3.545670309  | 4.834846008  |
| O437 | -5.566092135 | -1.218183449  | -0.007471986 |
| O438 | -3.305446112 | -4.743451260  | -3.975836014 |
| O439 | -7.733237336 | 2.002076623   | -0.750288509 |
| O440 | -6.668210444 | 2.616182231   | -3.540079475 |
| O441 | -9.909544866 | 0.456408686   | 2.167886727  |
| O442 | -5.798239887 | 1.212660221   | 4.369939683  |
| O443 | -4.657262585 | 4.830013432   | 3.599709921  |
| O444 | -7.253117379 | 6.777103916   | 5.146288249  |
| O445 | 10.424818786 | 0.452561006   | 4.581553352  |
| O446 | 3.192729846  | 5.188751328   | 4.012016031  |
| O447 | 3.110754061  | 8.923551117   | -0.679432643 |
| O448 | 0.378008165  | 9.801472212   | -3.503772307 |
| O449 | -1.739516022 | 6.952183663   | -1.783603449 |
| O450 | -1.118369325 | 7.828140706   | 2.129922676  |
| O451 | 1.981926442  | 6.151224201   | 1.537376371  |
| O452 | -0.007280683 | 12.275315931  | 1.980372279  |
| O453 | -3.771193568 | 13.716406987  | 0.476667459  |
| O454 | -4.205785479 | 11.217668737  | -2.013878519 |
| O455 | -5.982453760 | 13.245817164  | 3.589721980  |
| O456 | -5.813230894 | 6.471025539   | -1.629526791 |
| O457 | 2.290556122  | -4.324531930  | -8.743754445 |
| O458 | -0.034712879 | -0.731288157  | -8.479462349 |
| O459 | 1.759537587  | 3.902441615   | -8.251092301 |
| O460 | 6.144351172  | 4.467025466   | -8.748881481 |
| O461 | -4.602521666 | -2.929774456  | -8.986497995 |
| O462 | -0.794430316 | -6.601993736  | -5.998779443 |
| O463 | 1.037838067  | -5.618249118  | -6.802342309 |
| O464 | -3.917521523 | 2.097481128   | -8.437849572 |
| O465 | 10.325909748 | -4.525636109  | -3.440950204 |
| O466 | 13.171469206 | -5.849404909  | -1.922296371 |
| O467 | 0.204150098  | -6.510739139  | -0.633400155 |
| O468 | 0.884585774  | -8.415145745  | 0.292366511  |
| O469 | 5.782718995  | -10.435845513 | -3.120758247 |
| O470 | 3.552491885  | -10.522913934 | -3.472636364 |
| O471 | 5.468042972  | -5.400341463  | -1.190026894 |
| O472 | 5.455440047  | -7.186472055  | 0.182486442  |
| O473 | 3.060851465  | -5.836871603  | -2.123475870 |
| O474 | 9.422580741  | -5.825323957  | 1.174133240  |
| O475 | 7.424776427  | -4.014666929  | 0.292870649  |
| O476 | -4.708892534 | 4.333580884   | -2.691917786 |
| O477 | 8.622023479  | -9.725628938  | -2.103849323 |
| O478 | 8.034602073  | -8.029634540  | 0.145476367  |
| S479 | 3.867995587  | 5.521654850   | -2.528573062 |
| S480 | 2.375526126  | 2.377504483   | -3.671849019 |
| S481 | 2.231166347  | -2.899665314  | -3.338438127 |
| S482 | 3.740650341  | 2.400821853   | -0.328618946 |

|                  |                               |             |              |               |
|------------------|-------------------------------|-------------|--------------|---------------|
|                  | S483                          | 0.050088278 | -1.974898492 | -1.067865576  |
|                  | S484                          | 4.316028774 | -0.408836864 | -5.560961166  |
|                  | S485                          | 3.545503462 | -3.104431408 | -0.237739427  |
|                  | S486                          | 5.928202372 | 2.052915366  | -3.074492712  |
|                  | S487                          | 5.956999007 | -2.665218534 | -2.981088756  |
|                  | S488                          | 6.254817421 | -0.423315524 | -0.049587817  |
| <b>12, 47(2)</b> | <b>bm2unh2b2n2x6n2n.car_4</b> |             |              |               |
| Fe1              | 2.81                          | C1          | -7.795346731 | -5.266456165  |
| Fe2              | -0.98                         | C2          | -7.811587026 | -6.405722362  |
| Fe3              | 2.85                          | C3          | -9.039560368 | -3.382049756  |
| Fe4              | -2.12                         | C4          | -8.920374033 | -3.722243436  |
| Fe5              | 2.62                          | C5          | -9.274613645 | -5.363382576  |
| Fe6              | 0.97                          | C6          | -7.830499587 | -5.611009979  |
| Fe7              | -1.99                         | C7          | -5.556934777 | -6.213369281  |
|                  |                               | C8          | -4.823387923 | -4.874401827  |
|                  |                               | C9          | -4.580707343 | -2.582052655  |
|                  |                               | C10         | -4.957681541 | -1.847720332  |
|                  |                               | C11         | -6.636378285 | -1.392639973  |
|                  |                               | C12         | -6.049213809 | -2.047662117  |
|                  |                               | C13         | -5.751083581 | -4.125912296  |
|                  |                               | C14         | -4.278040871 | -4.508636380  |
|                  |                               | C15         | -2.175884231 | -5.201863208  |
|                  |                               | C16         | -1.092661568 | -4.203579018  |
|                  |                               | C17         | -0.681910750 | -1.931255971  |
|                  |                               | C18         | -0.838050495 | -0.703868300  |
|                  |                               | C19         | -0.914644210 | -1.623043013  |
|                  |                               | C20         | -0.262076717 | -0.296059702  |
|                  |                               | C21         | -0.425978550 | -2.795618982  |
|                  |                               | C22         | -2.261260277 | 1.167160641   |
|                  |                               | C23         | -2.463474223 | 0.849491573   |
|                  |                               | C24         | -3.423246032 | 1.992691276   |
|                  |                               | C25         | -3.739802960 | 3.218294355   |
|                  |                               | C26         | -3.097113178 | 2.427819294   |
|                  |                               | C27         | -3.584160290 | -0.507136322  |
|                  |                               | C28         | -2.319779844 | -0.775497914  |
|                  |                               | C29         | 4.828599949  | -11.504408963 |
|                  |                               | C30         | 5.523143327  | -10.249165156 |
|                  |                               | C31         | 5.758492774  | -7.796769449  |
|                  |                               | C32         | 6.728564781  | -7.422194444  |
|                  |                               | C33         | 4.597439737  | -6.793951722  |
|                  |                               | C34         | 5.045803399  | -5.356381587  |
|                  |                               | C35         | 3.868527104  | -4.493337259  |
|                  |                               | C36         | 3.897910993  | -2.001447502  |
|                  |                               | C37         | 8.980412285  | -6.627052034  |
|                  |                               | C38         | 9.259974924  | -5.140215169  |
|                  |                               | C39         | -4.783487473 | -2.528006337  |
|                  |                               | C40         | -5.258188391 | -1.099728283  |
|                  |                               | C41         | -3.297553718 | -2.649805394  |
|                  |                               | C42         | -2.726988178 | -4.082388135  |
|                  |                               | C43         | -2.158718522 | -4.597601086  |
|                  |                               | C44         | -5.712689203 | 1.095788760   |
|                  |                               | C45         | -7.127954723 | 1.485046856   |
|                  |                               | C46         | -5.328176183 | 1.842551884   |
|                  |                               | C47         | -9.258867870 | 0.719633277   |
|                  |                               | C48         | -9.124520305 | 0.827126840   |
|                  |                               | C49         | -7.706829007 | 0.458007826   |
|                  |                               | C50         | -6.662278892 | 1.456126018   |
|                  |                               | C51         | -4.919931570 | 3.099735393   |
|                  |                               | C52         | -5.508103897 | 4.423763685   |
|                  |                               | C53         | -4.020527270 | 3.491170770   |
|                  |                               | C54         | -3.222125814 | 2.407805958   |
|                  |                               |             |              | -0.898597110  |
|                  |                               |             |              | -1.923901275  |
|                  |                               |             |              | 0.071849026   |
|                  |                               |             |              | 1.555911275   |
|                  |                               |             |              | 3.330860344   |
|                  |                               |             |              | 3.781090086   |
|                  |                               |             |              | 3.095576804   |
|                  |                               |             |              | 3.222430756   |
|                  |                               |             |              | 2.430875754   |
|                  |                               |             |              | 3.727098237   |
|                  |                               |             |              | 5.420593613   |
|                  |                               |             |              | 6.679983524   |
|                  |                               |             |              | 7.941602844   |
|                  |                               |             |              | 8.138753953   |
|                  |                               |             |              | 7.061968144   |
|                  |                               |             |              | 6.642456698   |
|                  |                               |             |              | 5.707962354   |
|                  |                               |             |              | 6.624119611   |
|                  |                               |             |              | 4.212953172   |
|                  |                               |             |              | 3.822743908   |
|                  |                               |             |              | 3.355414032   |
|                  |                               |             |              | 7.338722269   |
|                  |                               |             |              | 8.830245114   |
|                  |                               |             |              | 6.735951611   |
|                  |                               |             |              | 7.601429706   |
|                  |                               |             |              | 5.300107293   |
|                  |                               |             |              | 10.499725327  |
|                  |                               |             |              | 11.292116148  |
|                  |                               |             |              | 5.073280198   |
|                  |                               |             |              | 4.544309390   |
|                  |                               |             |              | 4.966468884   |
|                  |                               |             |              | 6.104156501   |
|                  |                               |             |              | 4.845770220   |
|                  |                               |             |              | 4.572231534   |
|                  |                               |             |              | 4.114213091   |
|                  |                               |             |              | 4.383675120   |
|                  |                               |             |              | 6.652046001   |
|                  |                               |             |              | 6.710326615   |
|                  |                               |             |              | -2.776490074  |
|                  |                               |             |              | -2.455101161  |
|                  |                               |             |              | -2.392961246  |
|                  |                               |             |              | -2.350770485  |
|                  |                               |             |              | -3.669505774  |
|                  |                               |             |              | -3.455036581  |
|                  |                               |             |              | -3.010087106  |
|                  |                               |             |              | -4.748651192  |
|                  |                               |             |              | -2.090524123  |
|                  |                               |             |              | -0.563361947  |
|                  |                               |             |              | 1.412507272   |
|                  |                               |             |              | 1.914720162   |
|                  |                               |             |              | 1.363016255   |
|                  |                               |             |              | 1.908672737   |
|                  |                               |             |              | 0.178206078   |
|                  |                               |             |              | -0.481736244  |

|      |               |              |              |
|------|---------------|--------------|--------------|
| C55  | -2.734654228  | 1.185700792  | -0.084467606 |
| C56  | -2.044630039  | 1.529631960  | -2.164131855 |
| C57  | -7.359593631  | 6.044770732  | 1.671589989  |
| C58  | -7.687450234  | 6.172156062  | 3.156903302  |
| C59  | -8.649176113  | 6.122081359  | 0.821269505  |
| C60  | -9.180320390  | 7.500419207  | 0.550627567  |
| C61  | -9.255933620  | 8.615385455  | 1.363458919  |
| C62  | -10.081671200 | 9.063915060  | -0.642981161 |
| C63  | 8.052342691   | 1.329224748  | 5.699183943  |
| C64  | 9.006233572   | 0.148341852  | 5.729502321  |
| C65  | 6.705733002   | 0.794763532  | 5.151641493  |
| C66  | 5.624416468   | 1.850028084  | 5.094142633  |
| C67  | 4.792890123   | 2.111485657  | 6.198940388  |
| C68  | 5.417210163   | 2.601996431  | 3.922906796  |
| C69  | 3.787104607   | 3.083212967  | 6.136721648  |
| C70  | 4.425218680   | 3.579531976  | 3.848148800  |
| C71  | 3.608086387   | 3.817911253  | 4.957033537  |
| C72  | 5.821952786   | 7.196995811  | 0.283145499  |
| C73  | 4.815840514   | 8.205000380  | -0.285469641 |
| C74  | 5.188633745   | 5.796256475  | 0.337720276  |
| C75  | 4.156742690   | 9.539651908  | -2.239821854 |
| C76  | 2.779616829   | 9.005504744  | -2.633106583 |
| C77  | 1.338420400   | 7.040775402  | -2.972890346 |
| C78  | 0.445942964   | 6.887372273  | -1.724119798 |
| C79  | 1.574864273   | 5.703978827  | -3.698326266 |
| C80  | 0.335711655   | 4.913694118  | -4.132686279 |
| C81  | -0.489622489  | 5.495734837  | -5.297517650 |
| C82  | -1.842932708  | 7.591823670  | -5.147538021 |
| C83  | 0.269681279   | 6.397984989  | 0.662739661  |
| C84  | 0.025594362   | 7.727424655  | 1.405668877  |
| C85  | 0.875922712   | 5.390564121  | 1.643602441  |
| C86  | 1.017534201   | 9.839496639  | 2.141686166  |
| C87  | 0.406504963   | 11.175331614 | 1.724714244  |
| C88  | -0.819334155  | 12.457606803 | 0.019394310  |
| C89  | -2.251463180  | 12.822379404 | 0.470863047  |
| C90  | -0.710990546  | 12.489128042 | -1.521921423 |
| C91  | -1.576986670  | 11.415509027 | -2.169945937 |
| C92  | -4.351209683  | 12.007632788 | 1.458000098  |
| C93  | -4.506806243  | 13.030143566 | 2.577675193  |
| C94  | -4.942132953  | 10.639934532 | 1.897507360  |
| C95  | -4.953946975  | 9.635513048  | 0.767514527  |
| C96  | -5.981842836  | 9.664144974  | -0.189793462 |
| C97  | -3.923778576  | 8.695738076  | 0.604515938  |
| C98  | -5.974199543  | 8.804104955  | -1.290124737 |
| C99  | -3.888646510  | 7.839729511  | -0.501495163 |
| C100 | -4.914393320  | 7.908260145  | -1.441918791 |
| C101 | 6.090127774   | -3.631189447 | -7.959467549 |
| C102 | 4.593301640   | -3.437969488 | -7.782694059 |
| C103 | 2.857179065   | -1.982571264 | -6.761888130 |
| C104 | 2.477672713   | -0.614609571 | -7.337745773 |
| C105 | 2.807826648   | 1.799051269  | -7.169606050 |
| C106 | 3.919576922   | 2.827024269  | -6.991908985 |
| C107 | 6.092990847   | 3.448199940  | -6.065222738 |
| C108 | 7.209921228   | 3.448641151  | -7.090267278 |
| C109 | -0.537796690  | -3.183753746 | -9.613557780 |
| C110 | -1.611979246  | -2.092856880 | -9.515740582 |
| C111 | -0.381283193  | -3.886439528 | -8.245935329 |
| C112 | 0.376691993   | -5.219568027 | -8.389465606 |
| C113 | 0.778004198   | -5.756563132 | -7.034697596 |
| C114 | -2.149331441  | 0.207705772  | -8.878636173 |
| C115 | -1.557523367  | 1.509750208  | -9.384135043 |
| C116 | -2.763647413  | 0.285112592  | -7.458345724 |



|       |               |               |              |
|-------|---------------|---------------|--------------|
| C117  | -1.740963483  | 0.136558950   | -6.357095451 |
| C118  | -0.952301274  | 1.223253967   | -5.938993803 |
| C119  | -1.510090903  | -1.121407566  | -5.773755527 |
| C120  | 0.051105209   | 1.043786698   | -4.980280488 |
| C121  | -0.503983086  | -1.299503892  | -4.818930168 |
| C122  | 0.287116738   | -0.217038980  | -4.423307855 |
| C123  | 8.754882193   | -6.070813966  | -2.901376854 |
| C124  | 9.674069351   | -6.205384471  | -1.674477403 |
| C125  | 7.321281063   | -6.546513253  | -2.613944715 |
| C126  | 6.306346607   | -6.256462964  | -3.680591723 |
| C127  | 6.266709439   | -6.751613528  | -4.969512580 |
| C128  | 4.432178522   | -5.572771554  | -4.575982174 |
| C129  | 10.554505457  | -7.542592667  | 0.153986493  |
| C130  | 11.991225864  | -7.207624169  | -0.182486202 |
| C131  | 0.585812313   | -7.184189463  | -0.175149973 |
| C132  | 1.939495498   | -6.818450686  | 0.372418488  |
| C133  | 3.098831134   | -6.962352991  | -0.690050336 |
| C134  | 3.096322344   | -8.405203573  | -1.268979951 |
| C135  | 4.311771293   | -8.698095848  | -2.167381167 |
| C136  | 4.488408613   | -10.157140465 | -2.481907414 |
| C137  | 4.433890780   | -6.791116489  | 0.093496230  |
| C138  | 4.062973857   | -0.630956167  | -1.345780879 |
| Fe139 | 4.618515952   | -1.876352577  | -2.830960821 |
| Fe140 | 2.864543154   | 0.986297323   | -1.123079550 |
| Fe141 | 5.272052774   | 0.493324160   | -0.153560175 |
| Fe142 | 4.858911389   | 0.636707179   | -2.688514857 |
| Fe143 | 4.607925320   | 2.928254807   | -1.389273473 |
| Fe144 | 4.937069092   | -2.042618756  | -0.301002110 |
| Fe145 | 2.406028699   | -1.745432676  | -0.853589374 |
| H146  | -6.008907554  | -7.213839971  | -1.419343691 |
| H147  | -5.948802792  | -6.285741082  | -2.761607435 |
| H148  | -9.667653458  | -4.671805721  | -1.514135288 |
| H149  | -8.325148760  | -6.068675138  | -2.837858562 |
| H150  | -8.450623979  | -7.196412247  | -1.491228019 |
| H151  | -8.247287426  | -2.649292037  | -0.136814141 |
| H152  | -9.812290089  | -5.546800848  | 1.255429505  |
| H153  | -10.011163896 | -2.898776162  | -0.098527835 |
| H154  | -9.845357722  | -6.293576290  | 3.454277004  |
| H155  | -7.287588055  | -6.076439153  | 1.856995821  |
| H156  | -9.696319775  | -4.608715279  | 4.007862148  |
| H157  | -3.484118711  | -2.634387627  | 2.407342093  |
| H158  | -5.801252827  | -4.129285243  | 1.559847438  |
| H159  | -5.105697303  | -6.801898626  | 2.285323197  |
| H160  | -6.326453664  | -0.339861951  | 5.426383740  |
| H161  | -6.907705832  | -2.534504441  | 3.614586317  |
| H162  | -5.405664232  | -6.750067149  | 4.039459200  |
| H163  | -4.914405724  | -1.993419500  | 1.563832485  |
| H164  | -6.549369927  | -3.927231024  | 5.972834148  |
| H165  | -7.732835935  | -1.436974000  | 5.481046250  |
| H166  | -0.906264536  | -3.737823403  | 3.661157518  |
| H167  | -0.665371269  | -2.628075345  | 2.293883220  |
| H168  | 0.665259176   | -2.922180940  | 3.431663339  |
| H169  | -2.000475709  | -1.525059318  | 4.062422830  |
| H170  | -6.335372844  | -5.057025989  | 7.963609451  |
| H171  | -2.945978033  | 1.574568721   | 4.624930858  |
| H172  | -3.867351794  | -0.621240046  | 8.390262935  |
| H173  | -4.041919945  | 2.944892949   | 8.622568090  |
| H174  | -0.397153419  | -0.098411426  | 2.750337434  |
| H175  | 0.820824573   | -0.308281691  | 4.011271465  |
| H176  | 7.888754775   | 1.648475728   | 6.747165399  |
| H177  | -3.926232764  | 3.026128285   | 4.894881839  |
| H178  | -4.556727823  | 3.794587726   | 7.142779185  |

|      |               |              |               |
|------|---------------|--------------|---------------|
| H179 | -2.187904392  | 3.050567106  | 5.283750070   |
| H180 | -2.860451576  | 3.878536817  | 7.674736178   |
| H181 | -4.317716492  | 1.343856850  | 6.712948438   |
| H182 | -1.340510523  | 1.769204881  | 7.303831953   |
| H183 | -2.739471777  | -0.342291126 | 5.882828124   |
| H184 | -0.695528264  | 0.550244013  | 4.375129890   |
| H185 | 1.072907743   | 4.445099402  | 1.107508694   |
| H186 | 0.120150298   | 5.201007232  | 2.422349034   |
| H187 | 2.211482300   | 5.504565024  | 3.078739519   |
| H188 | 2.085440210   | 4.813864217  | 5.636629769   |
| H189 | 4.262276962   | 4.128007869  | 2.920712775   |
| H190 | 6.021868674   | 2.397888438  | 3.036410049   |
| H191 | 4.923985478   | 1.543406517  | 7.123365749   |
| H192 | -2.553071301  | -2.891974685 | 6.108870466   |
| H193 | -2.064867139  | -6.087358237 | 6.418733845   |
| H194 | -1.958589760  | -5.502146612 | 8.095317979   |
| H195 | -4.004387657  | -4.709578801 | 6.090441213   |
| H196 | -6.032726827  | -3.524584932 | 8.815468591   |
| H197 | 3.139063329   | 3.261275633  | 6.998797286   |
| H198 | 0.349619094   | -2.276049738 | 5.857800218   |
| H199 | -4.172170791  | 0.271594932  | 11.013362819  |
| H200 | -4.174854973  | -1.437275046 | 10.510579687  |
| H201 | -1.457477785  | -1.141849313 | 10.687457208  |
| H202 | 9.917182949   | -7.165351551 | 6.443667602   |
| H203 | -0.637334397  | -5.744145852 | -4.426238719  |
| H204 | 0.831433379   | -8.932869995 | 0.601896884   |
| H205 | -0.276094819  | -5.960117334 | -8.873657019  |
| H206 | 1.266788659   | -5.079481066 | -9.019825287  |
| H207 | -1.370816280  | -4.082941279 | -7.804409675  |
| H208 | -0.836805940  | 1.384868148  | -10.226302440 |
| H209 | -0.975977883  | -3.915069287 | -10.310232456 |
| H210 | -2.700351333  | -2.029113860 | -3.079118510  |
| H211 | -3.506439171  | -4.794351550 | -2.026987088  |
| H212 | -0.229227134  | -0.741827848 | -8.762060611  |
| H213 | -2.978335799  | -0.006100943 | -9.582963192  |
| H214 | 1.242377075   | -2.114244435 | -9.579486324  |
| H215 | -0.596651135  | -5.539142892 | -2.674825983  |
| H216 | 0.141870948   | -3.208742344 | -7.553457810  |
| H217 | 1.277713638   | -3.460297876 | -10.531111141 |
| H218 | -5.898227559  | -3.346185735 | -4.312206680  |
| H219 | -3.181013781  | -2.216466109 | -1.389045430  |
| H220 | 2.576056375   | -5.003935621 | -7.329167377  |
| H221 | -1.934725087  | -4.113678369 | -1.589327840  |
| H222 | -4.322443283  | 2.672980978  | 2.181358938   |
| H223 | -2.833947765  | 0.656213092  | 0.854580894   |
| H224 | -8.656996864  | 0.718824831  | 1.898449717   |
| H225 | -7.208656116  | 0.010479939  | -0.617460018  |
| H226 | -7.232612289  | 4.060620999  | 0.864239107   |
| H227 | -8.948658283  | 8.796180718  | 2.388146689   |
| H228 | -7.994806584  | 5.211201837  | 3.635213667   |
| H229 | -9.423360022  | 5.483654727  | 1.284035687   |
| H230 | -6.667794646  | 6.855382855  | 1.392004388   |
| H231 | -10.540308313 | 9.632999241  | -1.446592520  |
| H232 | -3.329020360  | 4.267419212  | 0.545383983   |
| H233 | -4.644192288  | 3.979581915  | -0.590278517  |
| H234 | -10.029456403 | 10.549685342 | 0.879874396   |
| H235 | -8.428648775  | 5.674566171  | -0.160866105  |
| H236 | -6.066972256  | 1.896156260  | -0.010559896  |
| H237 | -7.421466086  | -0.539116810 | 1.779418564   |
| H238 | -9.715227312  | 1.656547219  | -2.435140013  |
| H239 | -1.544102741  | 1.394035466  | -3.119695338  |
| H240 | -9.956899435  | -0.097591424 | -2.316503431  |

|      |              |              |              |
|------|--------------|--------------|--------------|
| H241 | 9.360522844  | 2.855945862  | 5.299463319  |
| H242 | 7.877171744  | 3.075646664  | 4.647345238  |
| H243 | 2.042251120  | 6.251955268  | -0.563197647 |
| H244 | -0.724404100 | 6.030771569  | 0.372561922  |
| H245 | 1.803389294  | 8.493565180  | 0.715602704  |
| H246 | -2.967372070 | 3.448175769  | -2.353111844 |
| H247 | -4.255275626 | 4.342767560  | -3.877775450 |
| H248 | -4.123366924 | 5.570502480  | -2.876505712 |
| H249 | -4.282833964 | 1.616580843  | -5.002045541 |
| H250 | -5.969293704 | 1.508034939  | -5.582127803 |
| H251 | 0.348097587  | 12.374616258 | -1.796141519 |
| H252 | -1.064053618 | 13.470690068 | -1.862395147 |
| H253 | 0.076877677  | 10.150696040 | -2.497909421 |
| H254 | -1.501537303 | 9.471471444  | -2.800454822 |
| H255 | -1.244661290 | 9.251575858  | -6.190313947 |
| H256 | -0.888518328 | 4.676542018  | -5.914070137 |
| H257 | -6.789077933 | 8.829214901  | -2.016788395 |
| H258 | -3.122554567 | 8.612682552  | 1.343839131  |
| H259 | -3.408937657 | 7.794527203  | -3.819959006 |
| H260 | 2.180921422  | 5.052678808  | -3.048496046 |
| H261 | 3.395280827  | 7.048984693  | -2.357065482 |
| H262 | -0.326832019 | 4.716245442  | -3.275302016 |
| H263 | -7.728348882 | -0.456074110 | -3.036804589 |
| H264 | 4.651599491  | 9.890721366  | -3.155725174 |
| H265 | -5.311791542 | -0.839016836 | -4.438072096 |
| H266 | 2.193636558  | 5.918292391  | -4.585236443 |
| H267 | -3.049283874 | 7.156239554  | -0.646569711 |
| H268 | -6.250608746 | 3.395341588  | -4.014868272 |
| H269 | 3.977321555  | 10.413193601 | -1.598123639 |
| H270 | -0.517760300 | 7.773252210  | -6.717136060 |
| H271 | -3.204758077 | 9.101445217  | -4.929431620 |
| H272 | -4.246261868 | -3.419004126 | -4.552426281 |
| H273 | -5.358913064 | -3.179560195 | -2.092241827 |
| H274 | -6.808771485 | 10.370162121 | -0.074835481 |
| H275 | -5.073982777 | 1.484161909  | -2.643946705 |
| H276 | 0.794020114  | 7.739566005  | -3.622365050 |
| H277 | 0.161247968  | 6.086150275  | -5.953611470 |
| H278 | 0.708540910  | 3.934505131  | -4.462220134 |
| H279 | -2.337168889 | 5.826760712  | -4.275876031 |
| H280 | 0.526277267  | 9.552475677  | 3.083546406  |
| H281 | -0.302723141 | 10.366239815 | -0.025129583 |
| H282 | -0.184934594 | 13.260678891 | 0.422273614  |
| H283 | 2.076169249  | 10.034230083 | 2.360330385  |
| H284 | -2.506657031 | 10.937114142 | 1.209768347  |
| H285 | 6.595286408  | -2.654373908 | -7.960238695 |
| H286 | 6.432455981  | -4.168260163 | -7.051148939 |
| H287 | 8.732734620  | -4.992893167 | -3.119098224 |
| H288 | 7.339622200  | -4.653050253 | -9.206180644 |
| H289 | 5.786467708  | -5.171149553 | -9.256075702 |
| H290 | 5.936249655  | 5.098344282  | 0.732053829  |
| H291 | 5.463250649  | 7.784266291  | 2.203753056  |
| H292 | 5.793086032  | 8.171158495  | -2.090057069 |
| H293 | 4.322427413  | 5.813538211  | 1.014248522  |
| H294 | 6.816414854  | 8.444105990  | 1.570881118  |
| H295 | 6.522716615  | 3.263479674  | -5.068526863 |
| H296 | 6.701592122  | 7.153167388  | -0.378962799 |
| H297 | 3.992334164  | -6.837929225 | 5.766294501  |
| H298 | 6.299038800  | -7.838451681 | 4.012908910  |
| H299 | 5.140554227  | 1.554039229  | -5.884862984 |
| H300 | 4.043803159  | 0.043429278  | 4.321689468  |
| H301 | 2.572894487  | 1.761340692  | -8.241849675 |
| H302 | -0.328498695 | -2.284869825 | -4.381821311 |

|      |              |               |              |
|------|--------------|---------------|--------------|
| H303 | 1.918704026  | 2.223790332   | -6.676171405 |
| H304 | 3.073717382  | -4.461102459  | 4.871894321  |
| H305 | 3.574876386  | 0.245622408   | -5.845468204 |
| H306 | 3.414736909  | -4.932872204  | 3.211722670  |
| H307 | 3.963634915  | -7.147930610  | 4.016365996  |
| H308 | 5.805891066  | -5.339052407  | 3.776664391  |
| H309 | 5.501946723  | -4.911088168  | 5.471486776  |
| H310 | -3.512839968 | -0.516047570  | -7.376300388 |
| H311 | 4.640469541  | -9.282265184  | 6.052998723  |
| H312 | 4.049920182  | -11.752712298 | 4.336083135  |
| H313 | 1.079281645  | -0.352024838  | -3.683348212 |
| H314 | 4.858437424  | -11.569002791 | 7.132830355  |
| H315 | 3.395930198  | -11.932835180 | 6.488551926  |
| H316 | 4.773268532  | -3.016701011  | 2.882945254  |
| H317 | 0.672199255  | 1.880881741   | -4.656560337 |
| H318 | -2.122858411 | -1.976904920  | -6.069776087 |
| H319 | 7.787710784  | -9.852174048  | 0.118556401  |
| H320 | 7.341460511  | -7.639195378  | -2.448381695 |
| H321 | 6.354512921  | -8.216743238  | 1.250868162  |
| H322 | 7.319038735  | -10.540083726 | -1.180580976 |
| H323 | 7.067023979  | 2.750853439   | -7.950067350 |
| H324 | 6.309555370  | -5.099594417  | 0.988152935  |
| H325 | 2.187624399  | -7.425791187  | 1.255793622  |
| H326 | 4.955626197  | -1.766052641  | -6.655335109 |
| H327 | 3.097943943  | -9.109079054  | -0.422696451 |
| H328 | 4.726256476  | -6.525698622  | -6.441726772 |
| H329 | 3.460381210  | -5.119566667  | -4.732152800 |
| H330 | 5.573714644  | -12.316836741 | 5.032688462  |
| H331 | 4.699831137  | -0.793683503  | 2.916355812  |
| H332 | 8.034905421  | -5.862222420  | 2.499303029  |
| H333 | 7.043509381  | -3.772327686  | 1.318649900  |
| H334 | 8.145894909  | -6.881093888  | 4.679504873  |
| H335 | 3.233821651  | -2.864853771  | 6.130051069  |
| H336 | 3.618116880  | -11.637536782 | -3.276297381 |
| H337 | 4.203162828  | -8.145717649  | -3.113121194 |
| H338 | 5.241281281  | -8.369097791  | -1.688257507 |
| H339 | 2.170726307  | -8.555856577  | -1.843224908 |
| H340 | 2.737441924  | -1.994501761  | -5.665879401 |
| H341 | -1.119210132 | 2.206441331   | -6.388088041 |
| H342 | -3.286789401 | 1.251970909   | -7.387967177 |
| H343 | 1.915584969  | -5.758414389  | 0.659243828  |
| H344 | 8.123226917  | -7.403958314  | 2.379477814  |
| H345 | 6.897351732  | -9.284845262  | 2.242774390  |
| H346 | 3.003173025  | -1.166735795  | 6.026253838  |
| H347 | 6.968229729  | -7.371181058  | -5.517574110 |
| H348 | 6.975278032  | -6.095319527  | -1.675380633 |
| H349 | 2.195060741  | -2.728988518  | -7.206454862 |
| H350 | 5.645026927  | 4.454790069   | -6.056788770 |
| H351 | 6.388820426  | -0.036157728  | 5.800126210  |
| H352 | 6.877424717  | 0.383648206   | 4.143469517  |
| H353 | 10.250228585 | -6.353976833  | -4.275021910 |
| H354 | 9.485582646  | -7.739754800  | -3.862968267 |
| H355 | 10.531240397 | -8.601727203  | 0.453427110  |
| H356 | 9.014497645  | -8.139090628  | -1.194750788 |
| H357 | 12.273588044 | -7.370663488  | -1.250993785 |
| H358 | 10.224029396 | -6.940440922  | 1.015499868  |
| H359 | 9.552976625  | -0.023883491  | 4.770768411  |
| H360 | -3.592866781 | 13.203466070  | 3.195162297  |
| H361 | 8.627352688  | -6.931491334  | 7.652808001  |
| H362 | 8.409927155  | -4.486450382  | 6.397145923  |
| H363 | -4.921785977 | 12.382290010  | 0.593459326  |
| H364 | -4.359213874 | 10.256106201  | 2.749941948  |

|       |              |               |               |
|-------|--------------|---------------|---------------|
| H365  | -5.964522971 | 10.826082897  | 2.257441409   |
| H366  | -5.664228496 | 7.149196430   | -3.072535709  |
| H367  | -0.289223111 | -1.771774976  | 0.209467647   |
| H368  | -1.398250223 | -0.189379417  | -1.141795823  |
| Mo369 | 4.189632094  | -4.295432655  | -1.610292405  |
| N370  | 1.923975624  | -0.450434485  | 1.731470853   |
| N371  | 2.102519124  | -0.877440552  | 0.702488921   |
| N372  | -6.522008077 | -6.976051431  | -2.271585489  |
| N373  | -8.936793820 | -4.526270057  | -0.821846413  |
| N374  | -9.391509393 | -4.931288067  | 1.946868867   |
| N375  | -6.979838912 | -6.069326604  | 2.828417283   |
| N376  | -5.161930580 | -3.912554589  | 2.326407786   |
| N377  | -6.222151894 | -2.028321636  | 4.179825084   |
| N378  | -6.094912309 | -3.405107869  | 6.726314202   |
| N379  | -3.547211571 | -4.721259470  | 7.008020523   |
| N380  | -1.544624683 | -3.011824380  | 6.176501121   |
| N381  | -2.035777605 | -0.054115708  | 6.564796845   |
| N382  | -3.304812096 | -0.175874358  | 9.117762342   |
| N383  | 4.204343088  | -11.317090336 | 6.388490785   |
| N384  | 5.232731291  | -9.128299404  | 5.229785597   |
| N385  | 4.277377620  | -3.130928983  | 3.771576596   |
| N386  | 3.198454997  | -2.038062158  | 5.542769372   |
| N387  | 4.170230973  | -0.826062995  | 3.812009538   |
| N388  | 7.944493986  | -6.977352637  | 5.697687666   |
| N389  | -5.022609495 | -2.832826416  | -4.192603625  |
| N390  | -1.053989943 | -5.361416269  | -3.571319564  |
| N391  | -5.475661954 | -0.328715466  | -3.554218560  |
| N392  | -8.011684068 | 0.490199737   | -2.794935468  |
| N393  | -7.935789981 | 0.425165819   | -0.022630942  |
| N394  | -5.948428033 | 2.143799450   | 0.969053758   |
| N395  | -2.778172211 | 2.589495486   | -1.786094887  |
| N396  | -2.026136645 | 0.661159008   | -1.148019784  |
| N397  | -6.732944427 | 4.749681286   | 1.421300490   |
| N398  | -9.698368852 | 7.794704429   | -0.700263989  |
| N399  | -9.830870812 | 9.597763801   | 0.585210042   |
| N400  | 8.596344118  | 2.369132580   | 4.825016225   |
| N401  | 6.284468300  | 7.570958622   | 1.627981858   |
| N402  | 5.034858064  | 8.603394428   | -1.568677583  |
| N403  | 2.625568933  | 7.662536139   | -2.672484121  |
| N404  | -1.632139702 | 6.308645150   | -4.864087044  |
| N405  | -1.078578526 | 8.263702642   | -6.029934827  |
| N406  | -2.803157788 | 8.279848856   | -4.485502077  |
| N407  | 1.057376533  | 6.536074209   | -0.559657275  |
| N408  | 0.932964686  | 8.727492400   | 1.203474831   |
| N409  | -0.315106021 | 11.200065986  | 0.564425508   |
| N410  | -0.943910225 | 10.239071918  | -2.427370032  |
| N411  | -2.953076853 | 11.843312434  | 1.091729322   |
| N412  | 6.369754962  | -4.330447599  | -9.217159278  |
| N413  | 4.228906975  | -2.332243563  | -7.107018079  |
| N414  | 3.048465372  | 0.440528617   | -6.719008571  |
| N415  | 5.056751945  | 2.468712895   | -6.341913879  |
| N416  | 0.690200951  | -2.677158655  | -10.237700624 |
| N417  | -1.199388221 | -0.874040623  | -9.066348913  |
| N418  | 9.326864256  | -6.750606006  | -4.078622286  |
| N419  | 5.146746213  | -5.514476978  | -3.456863972  |
| N420  | 5.079382204  | -6.308690605  | -5.513790225  |
| N421  | 9.677123440  | -7.387951014  | -0.997663162  |
| N422  | 0.310808492  | 2.294177715   | -0.553854580  |
| N423  | 1.244972254  | 1.695189388   | -0.794935017  |
| O424  | -6.832653710 | -5.066317601  | -0.133665013  |
| O425  | -8.415270884 | -2.911446581  | 2.348663842   |
| O426  | -7.495018584 | -5.425141643  | 4.962236724   |

|      |               |               |              |
|------|---------------|---------------|--------------|
| O427 | -3.979030377  | -4.680480990  | 4.110780025  |
| O428 | -4.138471069  | -1.126402957  | 4.317938221  |
| O429 | -5.601964336  | -1.355655838  | 7.610488415  |
| O430 | -3.832832219  | -4.647664576  | 9.286014271  |
| O431 | 0.103250093   | -4.518363385  | 6.728703303  |
| O432 | 0.082144688   | -0.336445189  | 7.368915478  |
| O433 | -1.887395091  | 1.495461558   | 9.720577820  |
| O434 | -2.253837360  | -0.667729763  | 12.507357402 |
| O435 | 6.262059213   | -10.329541722 | 3.539935612  |
| O436 | 6.389097065   | -7.543151526  | 7.294477794  |
| O437 | 10.321998323  | -4.669668561  | 7.084259697  |
| O438 | -5.430725512  | -0.685965858  | -1.289330315 |
| O439 | -2.691529456  | -4.340642886  | -4.774318597 |
| O440 | -7.391802451  | 2.689553345   | -2.804437850 |
| O441 | -5.442957566  | 3.263969319   | -4.577481288 |
| O442 | -10.078902722 | 1.250124303   | 0.099091344  |
| O443 | -6.495398825  | 1.625658409   | 3.124473559  |
| O444 | -4.854859326  | 5.154904659   | 2.657179583  |
| O445 | -7.659391692  | 7.216075738   | 3.784483076  |
| O446 | 9.161597338   | -0.584601921  | 6.696072688  |
| O447 | 2.626686371   | 4.781358672   | 4.826370364  |
| O448 | 3.856328090   | 8.637037487   | 0.381118184  |
| O449 | 1.880481622   | 9.819225369   | -2.928746123 |
| O450 | -0.777166144  | 7.086608767   | -1.806443871 |
| O451 | -0.941024477  | 7.834331319   | 2.173620207  |
| O452 | 2.072571654   | 5.931428374   | 2.208254426  |
| O453 | 0.556169654   | 12.169210799  | 2.446758011  |
| O454 | -2.705056442  | 13.957440693  | 0.271926843  |
| O455 | -2.791765055  | 11.583116153  | -2.359918626 |
| O456 | -5.559112139  | 13.600785702  | 2.813887997  |
| O457 | -4.834083054  | 7.065940470   | -2.564924609 |
| O458 | 3.783443254   | -4.294762833  | -8.221681905 |
| O459 | 1.716185351   | -0.505521006  | -8.323333227 |
| O460 | 3.731436052   | 3.970259513   | -7.440473658 |
| O461 | 8.201477015   | 4.154077854   | -6.995565346 |
| O462 | -2.795997335  | -2.322489679  | -9.812611015 |
| O463 | 0.009828163   | -6.358087425  | -6.289950651 |
| O464 | 2.039722669   | -5.502273654  | -6.635667018 |
| O465 | -1.855364342  | 2.618194871   | -8.962219017 |
| O466 | 10.461535356  | -5.294273045  | -1.356640991 |
| O467 | 12.818960319  | -6.863273979  | 0.649243988  |
| O468 | -0.144060101  | -6.451678802  | -0.824668163 |
| O469 | 0.157270252   | -8.464610421  | 0.072900501  |
| O470 | 5.484163947   | -10.829552860 | -2.226710752 |
| O471 | 3.409084522   | -10.693112826 | -3.112342045 |
| O472 | 5.172411257   | -5.796605445  | -0.283167903 |
| O473 | 4.748076680   | -7.604008938  | 0.992021131  |
| O474 | 2.964912482   | -6.002569047  | -1.678443162 |
| O475 | 8.491263127   | -6.642944328  | 2.900906776  |
| O476 | 6.870113758   | -4.663975817  | 1.678722381  |
| O477 | -3.601430160  | 4.879313553   | -3.349864587 |
| O478 | 8.126959175   | -10.374633522 | -0.652110803 |
| O479 | 7.193990426   | -8.699107378  | 1.499175632  |
| S480 | 4.628483686   | 5.209888295   | -1.331486128 |
| S481 | 3.239615834   | 2.143053835   | -2.981642545 |
| S482 | 2.662716177   | -2.979090552  | -2.945766522 |
| S483 | 3.827666433   | 2.117059273   | 0.575853307  |
| S484 | 0.085707482   | -1.932301114  | -1.088812741 |
| S485 | 5.290924338   | -0.556207569  | -4.506875100 |
| S486 | 3.299424069   | -3.407728322  | 0.404277767  |
| S487 | 6.526024035   | 1.689332338   | -1.681343927 |
| S488 | 6.226185391   | -3.078673889  | -1.801317528 |

|                  |                                 |             |              |               |              |
|------------------|---------------------------------|-------------|--------------|---------------|--------------|
|                  | S489                            | 6.139296175 | -1.019577991 | 1.242681456   |              |
| <b>12, 35(1)</b> | <b>bm2unh2b2n2x6n2n35.car_1</b> |             |              |               |              |
| Fe1              | 2.88                            | C1          | -7.793597294 | -5.267715364  | -0.899873623 |
| Fe2              | -0.76                           | C2          | -7.808303166 | -6.403883967  | -1.927668093 |
| Fe3              | -2.44                           | C3          | -9.035533807 | -3.379961543  | 0.067491650  |
| Fe4              | 2.76                            | C4          | -8.917465846 | -3.720591802  | 1.552002517  |
| Fe5              | -2.69                           | C5          | -9.276138584 | -5.362094788  | 3.326364698  |
| Fe6              | -1.03                           | C6          | -7.832594115 | -5.610972248  | 3.778133339  |
| Fe7              | 2.02                            | C7          | -5.558821697 | -6.215113740  | 3.094148144  |
|                  |                                 | C8          | -4.824581042 | -4.876909201  | 3.222829222  |
|                  |                                 | C9          | -4.579848881 | -2.583579294  | 2.437028127  |
|                  |                                 | C10         | -4.958121044 | -1.853371364  | 3.735461781  |
|                  |                                 | C11         | -6.639599983 | -1.398409066  | 5.425307700  |
|                  |                                 | C12         | -6.052435745 | -2.053336190  | 6.684693464  |
|                  |                                 | C13         | -5.750325207 | -4.133015068  | 7.943542913  |
|                  |                                 | C14         | -4.275828666 | -4.510621210  | 8.140350423  |
|                  |                                 | C15         | -2.172327559 | -5.200895705  | 7.063501720  |
|                  |                                 | C16         | -1.087732310 | -4.201400404  | 6.646685793  |
|                  |                                 | C17         | -0.678068827 | -1.927981355  | 5.705437536  |
|                  |                                 | C18         | -0.840744348 | -0.699609451  | 6.620271582  |
|                  |                                 | C19         | -0.914066736 | -1.620959161  | 4.210165217  |
|                  |                                 | C20         | -0.267143055 | -0.292855635  | 3.816491534  |
|                  |                                 | C21         | -0.417994560 | -2.786819630  | 3.347894134  |
|                  |                                 | C22         | -2.272188734 | 1.166825713   | 7.335271364  |
|                  |                                 | C23         | -2.472903105 | 0.849152197   | 8.827354120  |
|                  |                                 | C24         | -3.438116320 | 1.990211479   | 6.735139629  |
|                  |                                 | C25         | -3.755387619 | 3.214635770   | 7.601981426  |
|                  |                                 | C26         | -3.117676436 | 2.427284537   | 5.299035397  |
|                  |                                 | C27         | -3.583359399 | -0.514457278  | 10.496693017 |
|                  |                                 | C28         | -2.317950759 | -0.780958401  | 11.286873467 |
|                  |                                 | C29         | 4.825499440  | -11.498439460 | 5.058511442  |
|                  |                                 | C30         | 5.525667508  | -10.245072426 | 4.537067646  |
|                  |                                 | C31         | 5.758858590  | -7.794598088  | 4.964168765  |
|                  |                                 | C32         | 6.730816570  | -7.417508490  | 6.098391184  |
|                  |                                 | C33         | 4.594462641  | -6.796800968  | 4.845390845  |
|                  |                                 | C34         | 5.038221936  | -5.358301005  | 4.571372640  |
|                  |                                 | C35         | 3.857094738  | -4.499244052  | 4.115115418  |
|                  |                                 | C36         | 3.884225031  | -2.009386256  | 4.399101228  |
|                  |                                 | C37         | 8.981616594  | -6.620073527  | 6.640235848  |
|                  |                                 | C38         | 9.261411798  | -5.133528149  | 6.703152396  |
|                  |                                 | C39         | -4.782951634 | -2.535481278  | -2.781202112 |
|                  |                                 | C40         | -5.257634423 | -1.107959318  | -2.457739710 |
|                  |                                 | C41         | -3.297155483 | -2.656293312  | -2.395642609 |
|                  |                                 | C42         | -2.724154222 | -4.087075683  | -2.349769498 |
|                  |                                 | C43         | -2.153551277 | -4.602810011  | -3.667369320 |
|                  |                                 | C44         | -5.708824499 | 1.090891102   | -3.456605697 |
|                  |                                 | C45         | -7.124793278 | 1.477210456   | -3.011786314 |
|                  |                                 | C46         | -5.329444166 | 1.836590939   | -4.752410279 |
|                  |                                 | C47         | -9.254136834 | 0.708011280   | -2.092847591 |
|                  |                                 | C48         | -9.117201935 | 0.818076309   | -0.566882770 |
|                  |                                 | C49         | -7.699986925 | 0.459371892   | 1.408285748  |
|                  |                                 | C50         | -6.651677355 | 1.451573529   | 1.911828512  |
|                  |                                 | C51         | -4.918001966 | 3.106589861   | 1.357495312  |
|                  |                                 | C52         | -5.504942068 | 4.432062865   | 1.906591419  |
|                  |                                 | C53         | -4.019584806 | 3.495044415   | 0.171778957  |
|                  |                                 | C54         | -3.239958931 | 2.403727459   | -0.495144312 |
|                  |                                 | C55         | -2.745356366 | 1.185938010   | -0.092420811 |
|                  |                                 | C56         | -2.057897017 | 1.523096220   | -2.172051251 |
|                  |                                 | C57         | -7.362389556 | 6.051225872   | 1.678145170  |
|                  |                                 | C58         | -7.680443516 | 6.174274586   | 3.166673370  |
|                  |                                 | C59         | -8.654346212 | 6.125212283   | 0.832651902  |

|      |               |              |              |
|------|---------------|--------------|--------------|
| C60  | -9.186314280  | 7.502608361  | 0.563731727  |
| C61  | -9.251768927  | 8.619508947  | 1.374007624  |
| C62  | -10.090423053 | 9.066379565  | -0.627691820 |
| C63  | 8.059301064   | 1.330648545  | 5.690217862  |
| C64  | 9.016710418   | 0.153082336  | 5.725561061  |
| C65  | 6.712579654   | 0.793678319  | 5.145438623  |
| C66  | 5.633260081   | 1.850254823  | 5.087732048  |
| C67  | 4.805888079   | 2.118740187  | 6.193769354  |
| C68  | 5.424915853   | 2.597214002  | 3.913932207  |
| C69  | 3.799753260   | 3.090148010  | 6.129222755  |
| C70  | 4.434037924   | 3.575851890  | 3.837093827  |
| C71  | 3.617708951   | 3.818357865  | 4.945883619  |
| C72  | 5.827776048   | 7.198974080  | 0.272700474  |
| C73  | 4.825114470   | 8.211370490  | -0.294019471 |
| C74  | 5.198784830   | 5.796012260  | 0.305483176  |
| C75  | 4.153400977   | 9.543656615  | -2.244544558 |
| C76  | 2.774939081   | 9.008557148  | -2.630275987 |
| C77  | 1.333341695   | 7.043631473  | -2.970869434 |
| C78  | 0.441339354   | 6.889022060  | -1.722269524 |
| C79  | 1.571407174   | 5.705130525  | -3.691614240 |
| C80  | 0.335545298   | 4.908562075  | -4.122456006 |
| C81  | -0.490252471  | 5.481557650  | -5.290233251 |
| C82  | -1.840512443  | 7.580480048  | -5.142548897 |
| C83  | 0.267538590   | 6.404391260  | 0.665703564  |
| C84  | 0.028025029   | 7.733210753  | 1.411524640  |
| C85  | 0.869336155   | 5.389406292  | 1.641087475  |
| C86  | 1.018186899   | 9.846230457  | 2.146461261  |
| C87  | 0.404253404   | 11.180283768 | 1.726961678  |
| C88  | -0.823785836  | 12.458562941 | 0.020517157  |
| C89  | -2.255684867  | 12.826525198 | 0.470146014  |
| C90  | -0.713784692  | 12.487211455 | -1.520958801 |
| C91  | -1.579977539  | 11.413043075 | -2.168098139 |
| C92  | -4.358788287  | 12.014640487 | 1.458238260  |
| C93  | -4.514136435  | 13.036077667 | 2.578631340  |
| C94  | -4.946513282  | 10.644798229 | 1.897274349  |
| C95  | -4.957805117  | 9.639505857  | 0.767158559  |
| C96  | -5.985492969  | 9.667523340  | -0.190475284 |
| C97  | -3.929402841  | 8.696924009  | 0.606545783  |
| C98  | -5.978539194  | 8.805887415  | -1.289560107 |
| C99  | -3.895305731  | 7.838820132  | -0.497894698 |
| C100 | -4.920428971  | 7.907357089  | -1.438685016 |
| C101 | 6.090799684   | -3.636155546 | -7.956745448 |
| C102 | 4.593066655   | -3.442777346 | -7.779011868 |
| C103 | 2.859801009   | -1.986830421 | -6.749951634 |
| C104 | 2.479155909   | -0.619137194 | -7.327691864 |
| C105 | 2.809915302   | 1.798440164  | -7.162128978 |
| C106 | 3.924197941   | 2.825691910  | -6.990992009 |
| C107 | 6.106842758   | 3.441065028  | -6.079483041 |
| C108 | 7.223266005   | 3.446706481  | -7.105040484 |
| C109 | -0.536843596  | -3.183637887 | -9.618355309 |
| C110 | -1.611361864  | -2.091454837 | -9.523386861 |
| C111 | -0.382385594  | -3.887911995 | -8.250860178 |
| C112 | 0.375644499   | -5.221802819 | -8.392536599 |
| C113 | 0.778267406   | -5.759302757 | -7.037733217 |
| C114 | -2.150000963  | 0.212029403  | -8.887433830 |
| C115 | -1.557890757  | 1.516047171  | -9.389142636 |
| C116 | -2.756440705  | 0.289096961  | -7.462484543 |
| C117 | -1.732368828  | 0.140395777  | -6.362123777 |
| C118 | -0.946014074  | 1.225368547  | -5.934407201 |
| C119 | -1.504726652  | -1.118842455 | -5.780731927 |
| C120 | 0.051556485   | 1.042944530  | -4.969504269 |
| C121 | -0.504924948  | -1.301648475 | -4.820283797 |



|       |               |               |              |
|-------|---------------|---------------|--------------|
| C122  | 0.283627651   | -0.220456851  | -4.415429131 |
| C123  | 8.747918286   | -6.076305131  | -2.912091848 |
| C124  | 9.665907875   | -6.204974127  | -1.684073220 |
| C125  | 7.313021560   | -6.544731495  | -2.619611219 |
| C126  | 6.302312967   | -6.261470232  | -3.689899392 |
| C127  | 6.256816846   | -6.759019744  | -4.977385180 |
| C128  | 4.431151392   | -5.565621128  | -4.582736168 |
| C129  | 10.544661935  | -7.537652562  | 0.147507187  |
| C130  | 11.981834838  | -7.203792830  | -0.188404916 |
| C131  | 0.580033690   | -7.176671153  | -0.172600372 |
| C132  | 1.933862120   | -6.813079114  | 0.374789511  |
| C133  | 3.103391100   | -6.979611509  | -0.673573297 |
| C134  | 3.091627006   | -8.420681050  | -1.252583154 |
| C135  | 4.303242742   | -8.701061493  | -2.157215069 |
| C136  | 4.485602105   | -10.154796350 | -2.489559555 |
| C137  | 4.426123697   | -6.812475940  | 0.134853587  |
| C138  | 4.059668165   | -0.619747666  | -1.351642120 |
| Fe139 | 4.627352937   | -1.893574123  | -2.819318075 |
| Fe140 | 2.933018914   | 1.043467629   | -1.159633210 |
| Fe141 | 5.267387355   | 0.511927659   | -0.201354710 |
| Fe142 | 4.882002118   | 0.640868966   | -2.756720779 |
| Fe143 | 4.749296118   | 2.920292564   | -1.261000943 |
| Fe144 | 4.910905686   | -2.031215976  | -0.293715135 |
| Fe145 | 2.387160495   | -1.651910550  | -0.842227786 |
| H146  | -6.009745416  | -7.211848757  | -1.409175279 |
| H147  | -5.939180378  | -6.286123586  | -2.752133853 |
| H148  | -9.661079097  | -4.666570658  | -1.522356836 |
| H149  | -8.312489827  | -6.062716418  | -2.845129339 |
| H150  | -8.452696121  | -7.193696965  | -1.502364338 |
| H151  | -8.242520270  | -2.647550160  | -0.140004143 |
| H152  | -9.813359470  | -5.542932534  | 1.250215346  |
| H153  | -10.006881393 | -2.896421684  | -0.102729121 |
| H154  | -9.847365813  | -6.291892073  | 3.447713106  |
| H155  | -7.288643225  | -6.074967328  | 1.854256031  |
| H156  | -9.698869700  | -4.608191512  | 4.003283487  |
| H157  | -3.483281276  | -2.636185965  | 2.414267120  |
| H158  | -5.801834671  | -4.127455550  | 1.561796894  |
| H159  | -5.107392510  | -6.803835428  | 2.284103572  |
| H160  | -6.330663924  | -0.345397433  | 5.431156541  |
| H161  | -6.910014368  | -2.534574272  | 3.615377090  |
| H162  | -5.408839490  | -6.752329785  | 4.037959300  |
| H163  | -4.912209859  | -1.991932768  | 1.571460872  |
| H164  | -6.548128914  | -3.932184914  | 5.973943569  |
| H165  | -7.736038372  | -1.443888375  | 5.484906065  |
| H166  | -0.870820520  | -3.738566280  | 3.664571596  |
| H167  | -0.683088330  | -2.626125026  | 2.291357245  |
| H168  | 0.677296267   | -2.885833951  | 3.403131249  |
| H169  | -2.001319585  | -1.529763742  | 4.064131008  |
| H170  | -6.333192472  | -5.065167361  | 7.963820842  |
| H171  | -2.964698250  | 1.575250578   | 4.622727068  |
| H172  | -3.876846821  | -0.622593873  | 8.389049459  |
| H173  | -4.053699435  | 2.941266970   | 8.624104447  |
| H174  | -0.408598925  | -0.096466694  | 2.745145571  |
| H175  | 0.816215538   | -0.305650986  | 3.998692381  |
| H176  | 7.894803015   | 1.651386697   | 6.737409457  |
| H177  | -3.949893072  | 3.023700621   | 4.897500043  |
| H178  | -4.575569406  | 3.787995506   | 7.145996057  |
| H179  | -2.211093582  | 3.053613027   | 5.280650869  |
| H180  | -2.878183535  | 3.878015679   | 7.672025292  |
| H181  | -4.330852635  | 1.339183610   | 6.713780415  |
| H182  | -1.353212710  | 1.771728039   | 7.300434506  |
| H183  | -2.747963470  | -0.350273499  | 5.886050702  |

|      |               |              |               |
|------|---------------|--------------|---------------|
| H184 | -0.697410967  | 0.552702752  | 4.371099731   |
| H185 | 1.042401251   | 4.439709715  | 1.104022193   |
| H186 | 0.121282538   | 5.214014204  | 2.430615189   |
| H187 | 2.220040725   | 5.494449912  | 3.063377118   |
| H188 | 2.096465495   | 4.819275091  | 5.623426317   |
| H189 | 4.271993068   | 4.124821749  | 2.909328880   |
| H190 | 6.029285867   | 2.388119659  | 3.028732247   |
| H191 | 4.939414448   | 1.556080147  | 7.121444011   |
| H192 | -2.547351990  | -2.891047837 | 6.110762594   |
| H193 | -2.059760002  | -6.084348918 | 6.417251266   |
| H194 | -1.955054996  | -5.504940897 | 8.095903337   |
| H195 | -4.002401140  | -4.716445199 | 6.092279374   |
| H196 | -6.034051228  | -3.533804256 | 8.818205253   |
| H197 | 3.152714710   | 3.271443029  | 6.991501157   |
| H198 | 0.354682390   | -2.268985700 | 5.856102541   |
| H199 | -4.172531066  | 0.261612013  | 11.012931994  |
| H200 | -4.172330202  | -1.445517801 | 10.507767384  |
| H201 | -1.455329625  | -1.146141607 | 10.682329305  |
| H202 | 9.917866287   | -7.158548926 | 6.429936638   |
| H203 | -0.634676072  | -5.750752795 | -4.423398984  |
| H204 | 0.822156249   | -8.926299755 | 0.604722684   |
| H205 | -0.276993069  | -5.963395127 | -8.875477147  |
| H206 | 1.266119254   | -5.082869546 | -9.022983454  |
| H207 | -1.371700681  | -4.082702225 | -7.808088910  |
| H208 | -0.836291621  | 1.396116718  | -10.231456917 |
| H209 | -0.974015528  | -3.913254088 | -10.317111899 |
| H210 | -2.701742555  | -2.036645256 | -3.083606898  |
| H211 | -3.502395546  | -4.799811264 | -2.024603212  |
| H212 | -0.230322945  | -0.739020385 | -8.769881514  |
| H213 | -2.980963965  | 0.000115877  | -9.589084509  |
| H214 | 1.245105479   | -2.119298718 | -9.574385603  |
| H215 | -0.597831112  | -5.552204514 | -2.671733418  |
| H216 | 0.141609211   | -3.210143785 | -7.559480379  |
| H217 | 1.280963095   | -3.462553141 | -10.528509515 |
| H218 | -5.893046839  | -3.355096648 | -4.320164761  |
| H219 | -3.180970702  | -2.219486429 | -1.393426509  |
| H220 | 2.575727501   | -5.001789256 | -7.330646372  |
| H221 | -1.932959991  | -4.115308048 | -1.587286330  |
| H222 | -4.321802911  | 2.677911449  | 2.176025042   |
| H223 | -2.841022818  | 0.659363266  | 0.849672025   |
| H224 | -8.649471121  | 0.731772779  | 1.888706599   |
| H225 | -7.196501865  | 0.010092980  | -0.620032566  |
| H226 | -7.229992119  | 4.070789602  | 0.863998545   |
| H227 | -8.935891057  | 8.802454814  | 2.395378247   |
| H228 | -7.981894685  | 5.210686174  | 3.644885841   |
| H229 | -9.426050860  | 5.485034428  | 1.296428706   |
| H230 | -6.674961381  | 6.864747402  | 1.397642506   |
| H231 | -10.552585496 | 9.635790628  | -1.430080011  |
| H232 | -3.314630035  | 4.256240486  | 0.543919376   |
| H233 | -4.639979892  | 3.997620628  | -0.588666036  |
| H234 | -10.019996277 | 10.557411042 | 0.890152891   |
| H235 | -8.434303728  | 5.678590492  | -0.149710001  |
| H236 | -6.065920559  | 1.903152203  | -0.012996563  |
| H237 | -7.427790038  | -0.538950136 | 1.780623995   |
| H238 | -9.712459114  | 1.643601388  | -2.438853334  |
| H239 | -1.551840090  | 1.388214003  | -3.124450752  |
| H240 | -9.950547706  | -0.111065964 | -2.317635049  |
| H241 | 9.365830607   | 2.857864710  | 5.293062755   |
| H242 | 7.884512823   | 3.077824728  | 4.639104539   |
| H243 | 2.042256352   | 6.273837611  | -0.557253771  |
| H244 | -0.728573749  | 6.043388967  | 0.374674755   |
| H245 | 1.807011659   | 8.499719606  | 0.721400295   |

|      |              |              |              |
|------|--------------|--------------|--------------|
| H246 | -2.994588015 | 3.432382248  | -2.372526902 |
| H247 | -4.269744057 | 4.346739194  | -3.890535032 |
| H248 | -4.134835926 | 5.565356303  | -2.878533658 |
| H249 | -4.283080436 | 1.616834362  | -5.005211176 |
| H250 | -5.968837146 | 1.494845536  | -5.584018516 |
| H251 | 0.345364167  | 12.372266899 | -1.795267869 |
| H252 | -1.066087685 | 13.468386251 | -1.863330892 |
| H253 | 0.073160657  | 10.146625414 | -2.492080931 |
| H254 | -1.505428383 | 9.467926853  | -2.795821879 |
| H255 | -1.236386093 | 9.241133808  | -6.180391239 |
| H256 | -0.889823244 | 4.658499151  | -5.901253753 |
| H257 | -6.793066854 | 8.830413380  | -2.017090953 |
| H258 | -3.128159438 | 8.613424000  | 1.346163181  |
| H259 | -3.406081226 | 7.783339783  | -3.815514424 |
| H260 | 2.180274983  | 5.056622760  | -3.041340879 |
| H261 | 3.395539928  | 7.051589405  | -2.371508603 |
| H262 | -0.327353964 | 4.711827306  | -3.265435445 |
| H263 | -7.718885468 | -0.466063276 | -3.034532019 |
| H264 | 4.642257663  | 9.898717363  | -3.162204837 |
| H265 | -5.306612308 | -0.842657054 | -4.439876897 |
| H266 | 2.189127856  | 5.916604901  | -4.580008172 |
| H267 | -3.058802724 | 7.151884145  | -0.640739132 |
| H268 | -6.258747204 | 3.386356321  | -4.020504942 |
| H269 | 3.975898425  | 10.414028328 | -1.598358622 |
| H270 | -0.513956828 | 7.761417808  | -6.710585250 |
| H271 | -3.205667539 | 9.087591548  | -4.928130697 |
| H272 | -4.241072801 | -3.421406357 | -4.557841804 |
| H273 | -5.359940596 | -3.188110405 | -2.098819878 |
| H274 | -6.810790036 | 10.375066523 | -0.077340105 |
| H275 | -5.070275644 | 1.481068736  | -2.646376030 |
| H276 | 0.788590892  | 7.741830443  | -3.620661556 |
| H277 | 0.159324388  | 6.068216469  | -5.951050585 |
| H278 | 0.714381004  | 3.929544473  | -4.445596535 |
| H279 | -2.340605214 | 5.816207406  | -4.274754881 |
| H280 | 0.526034921  | 9.559152678  | 3.087941851  |
| H281 | -0.307147365 | 10.367332349 | -0.020440474 |
| H282 | -0.188697238 | 13.262007718 | 0.421478698  |
| H283 | 2.076057900  | 10.043333909 | 2.367182397  |
| H284 | -2.516568667 | 10.942223180 | 1.208305347  |
| H285 | 6.595144328  | -2.658637004 | -7.961906130 |
| H286 | 6.435575050  | -4.168912575 | -7.046249379 |
| H287 | 8.728940487  | -5.000133837 | -3.139041856 |
| H288 | 7.340160638  | -4.663618507 | -9.198848027 |
| H289 | 5.786391875  | -5.181144322 | -9.248033913 |
| H290 | 5.953172362  | 5.106454436  | 0.704410399  |
| H291 | 5.430811489  | 7.746932985  | 2.190183839  |
| H292 | 5.799117144  | 8.184655076  | -2.102321213 |
| H293 | 4.329770779  | 5.801825646  | 0.981089850  |
| H294 | 6.795076930  | 8.427749967  | 1.600748046  |
| H295 | 6.537739500  | 3.252190924  | -5.083788464 |
| H296 | 6.715122801  | 7.166968732  | -0.378837916 |
| H297 | 3.989291730  | -6.842567224 | 5.765771055  |
| H298 | 6.296593763  | -7.835055641 | 4.008993799  |
| H299 | 5.154276577  | 1.546321289  | -5.905440637 |
| H300 | 4.015697650  | 0.035455852  | 4.349372345  |
| H301 | 2.568524782  | 1.761208333  | -8.233315454 |
| H302 | -0.332329276 | -2.289166275 | -4.386253002 |
| H303 | 1.924506540  | 2.224656578  | -6.663222030 |
| H304 | 3.062808711  | -4.471963269 | 4.873678907  |
| H305 | 3.575929951  | 0.249440856  | -5.838778462 |
| H306 | 3.405679829  | -4.938673198 | 3.211346515  |
| H307 | 3.961386780  | -7.152327462 | 4.016136117  |

|       |              |               |              |
|-------|--------------|---------------|--------------|
| H308  | 5.797666420  | -5.338122027  | 3.775367411  |
| H309  | 5.494531321  | -4.912252009  | 5.470236782  |
| H310  | -3.503595166 | -0.513042912  | -7.378837062 |
| H311  | 4.642470086  | -9.283298140  | 6.049117663  |
| H312  | 4.045132579  | -11.739836041 | 4.321054439  |
| H313  | 1.070698552  | -0.357342499  | -3.670052275 |
| H314  | 4.858666751  | -11.568286435 | 7.117658960  |
| H315  | 3.395964372  | -11.932360128 | 6.475548213  |
| H316  | 4.733997184  | -3.013598648  | 2.875656290  |
| H317  | 0.670536986  | 1.879467442   | -4.637007880 |
| H318  | -2.118215770 | -1.971753514  | -6.081537049 |
| H319  | 7.781023391  | -9.836593360  | 0.116567612  |
| H320  | 7.329200492  | -7.634587676  | -2.437786108 |
| H321  | 6.340406844  | -8.216983000  | 1.262468934  |
| H322  | 7.314793985  | -10.527171483 | -1.183215173 |
| H323  | 7.080474273  | 2.753549745   | -7.969011479 |
| H324  | 6.293208324  | -5.086888243  | 1.016887781  |
| H325  | 2.170842054  | -7.412221700  | 1.267100773  |
| H326  | 4.957156783  | -1.779516105  | -6.637324520 |
| H327  | 3.092413007  | -9.132033949  | -0.412271702 |
| H328  | 4.716094143  | -6.520162633  | -6.448533895 |
| H329  | 3.460393323  | -5.108202480  | -4.735240689 |
| H330  | 5.566366991  | -12.314765686 | 5.014020550  |
| H331  | 4.673187564  | -0.787961013  | 2.933078843  |
| H332  | 8.024216933  | -5.854539642  | 2.494614457  |
| H333  | 7.071919240  | -3.773401295  | 1.293311885  |
| H334  | 8.142120113  | -6.873085431  | 4.668683526  |
| H335  | 3.228575387  | -2.883429940  | 6.145413716  |
| H336  | 3.608987539  | -11.636801703 | -3.275351770 |
| H337  | 4.187906397  | -8.137261821  | -3.094833743 |
| H338  | 5.233086830  | -8.372248189  | -1.679656310 |
| H339  | 2.165744801  | -8.564962919  | -1.828137910 |
| H340  | 2.746751394  | -1.995654141  | -5.653120646 |
| H341  | -1.111583045 | 2.211219610   | -6.377378245 |
| H342  | -3.282243075 | 1.254121291   | -7.391792555 |
| H343  | 1.916609205  | -5.748538440  | 0.645934355  |
| H344  | 8.114583591  | -7.397449150  | 2.370827872  |
| H345  | 6.908806278  | -9.279019476  | 2.241140179  |
| H346  | 3.003825633  | -1.183592589  | 6.051848580  |
| H347  | 6.952165905  | -7.381164589  | -5.529093689 |
| H348  | 6.967376447  | -6.078446832  | -1.687899736 |
| H349  | 2.192206016  | -2.731966839  | -7.187880982 |
| H350  | 5.658223147  | 4.446907458   | -6.062877446 |
| H351  | 6.397689753  | -0.035033879  | 5.797593488  |
| H352  | 6.880531835  | 0.379383582   | 4.138112594  |
| H353  | 10.240154762 | -6.371622677  | -4.287540240 |
| H354  | 9.477022880  | -7.753771587  | -3.861238039 |
| H355  | 10.519671574 | -8.596124987  | 0.450416309  |
| H356  | 9.013356778  | -8.142210428  | -1.206625824 |
| H357  | 12.263844005 | -7.367976735  | -1.256725183 |
| H358  | 10.213401651 | -6.933132378  | 1.007076792  |
| H359  | 9.565947510  | -0.020634962  | 4.768232513  |
| H360  | -3.599998104 | 13.208860949  | 3.195374865  |
| H361  | 8.628642824  | -6.926305427  | 7.640416077  |
| H362  | 8.412822726  | -4.478699416  | 6.388270003  |
| H363  | -4.929796613 | 12.389248716  | 0.593580254  |
| H364  | -4.360768045 | 10.262946323  | 2.748602563  |
| H365  | -5.968568595 | 10.827840392  | 2.259401045  |
| H366  | -5.669318259 | 7.149337913   | -3.070415472 |
| H367  | -0.271959942 | -1.790111133  | 0.253417167  |
| H368  | -1.375340009 | -0.181833576  | -1.130128570 |
| M0369 | 4.215327620  | -4.330618647  | -1.600307920 |

|      |              |               |               |
|------|--------------|---------------|---------------|
| N370 | 1.957252591  | -0.355625841  | 1.747945615   |
| N371 | 2.111036894  | -0.794529677  | 0.720602799   |
| N372 | -6.516667061 | -6.976101351  | -2.265993099  |
| N373 | -8.933353512 | -4.524534089  | -0.826035142  |
| N374 | -9.391579913 | -4.928787105  | 1.942570690   |
| N375 | -6.981401790 | -6.069241692  | 2.825922544   |
| N376 | -5.161442990 | -3.913402968  | 2.328089309   |
| N377 | -6.223941309 | -2.033374698  | 4.184676882   |
| N378 | -6.095719556 | -3.410815052  | 6.729288858   |
| N379 | -3.544713618 | -4.722884840  | 7.009586214   |
| N380 | -1.538572286 | -3.010799155  | 6.175943144   |
| N381 | -2.041572643 | -0.054675813  | 6.561916243   |
| N382 | -3.308856847 | -0.180765463  | 9.114776055   |
| N383 | 4.203125793  | -11.315294831 | 6.375131219   |
| N384 | 5.236500982  | -9.127172576  | 5.227344707   |
| N385 | 4.257506950  | -3.133912337  | 3.774299108   |
| N386 | 3.192781846  | -2.053261085  | 5.563123674   |
| N387 | 4.155823955  | -0.829786509  | 3.837059251   |
| N388 | 7.943713785  | -6.968742263  | 5.687726800   |
| N389 | -5.019696820 | -2.838619330  | -4.198255568  |
| N390 | -1.052241697 | -5.370788000  | -3.568433266  |
| N391 | -5.470053171 | -0.333688384  | -3.555421973  |
| N392 | -8.007079508 | 0.480540548   | -2.798874115  |
| N393 | -7.925708347 | 0.424290768   | -0.026925651  |
| N394 | -5.948408636 | 2.150868986   | 0.966439039   |
| N395 | -2.799769509 | 2.580018902   | -1.800707920  |
| N396 | -2.031616277 | 0.660447923   | -1.151974551  |
| N397 | -6.731976654 | 4.758847414   | 1.423849903   |
| N398 | -9.712337664 | 7.795395128   | -0.684176272  |
| N399 | -9.828300597 | 9.602817058   | 0.597534402   |
| N400 | 8.603537563  | 2.370739362   | 4.815603775   |
| N401 | 6.266666535  | 7.550957642   | 1.629769892   |
| N402 | 5.036383741  | 8.607024460   | -1.579541684  |
| N403 | 2.620655964  | 7.665958876   | -2.670828480  |
| N404 | -1.633214392 | 6.296453068   | -4.861374679  |
| N405 | -1.073143382 | 8.252391151   | -6.022324635  |
| N406 | -2.800667653 | 8.269416838   | -4.480770053  |
| N407 | 1.053903435  | 6.542444839   | -0.556800245  |
| N408 | 0.937141313  | 8.731952835   | 1.210765729   |
| N409 | -0.320456772 | 11.201624912  | 0.568493039   |
| N410 | -0.947856696 | 10.235114398  | -2.421437726  |
| N411 | -2.960098541 | 11.849981622  | 1.091807889   |
| N412 | 6.370306834  | -4.340605502  | -9.211781155  |
| N413 | 4.229872256  | -2.337877277  | -7.101269842  |
| N414 | 3.051315070  | 0.438695027   | -6.711991690  |
| N415 | 5.069806982  | 2.462657624   | -6.358187261  |
| N416 | 0.694202152  | -2.678018108  | -10.237274045 |
| N417 | -1.199379869 | -0.870327640  | -9.078331863  |
| N418 | 9.317073023  | -6.766554429  | -4.085149602  |
| N419 | 5.149656083  | -5.510568540  | -3.466270921  |
| N420 | 5.070796406  | -6.309091077  | -5.519708273  |
| N421 | 9.669775954  | -7.386523729  | -1.005596177  |
| N422 | 0.335736000  | 2.219495397   | -0.532158905  |
| N423 | 1.288705500  | 1.669063772   | -0.815980225  |
| O424 | -6.834442090 | -5.072900783  | -0.129426336  |
| O425 | -8.411209622 | -2.910221485  | 2.344586314   |
| O426 | -7.498504870 | -5.426512475  | 4.959906072   |
| O427 | -3.980848427 | -4.684958679  | 4.112196407   |
| O428 | -4.139284110 | -1.135090146  | 4.330739768   |
| O429 | -5.607797290 | -1.361453619  | 7.616646744   |
| O430 | -3.829011826 | -4.645471898  | 9.287464369   |
| O431 | 0.107698494  | -4.516962863  | 6.737757716   |

|                                   |               |               |              |
|-----------------------------------|---------------|---------------|--------------|
| O432                              | 0.078604792   | -0.326044664  | 7.363103378  |
| O433                              | -1.899886187  | 1.497902433   | 9.717695095  |
| O434                              | -2.251134532  | -0.673010872  | 12.501898886 |
| O435                              | 6.266603332   | -10.323226401 | 3.533963882  |
| O436                              | 6.396306018   | -7.540919044  | 7.289918436  |
| O437                              | 10.321982289  | -4.664083512  | 7.082723150  |
| O438                              | -5.435104473  | -0.697667625  | -1.291481591 |
| O439                              | -2.682736896  | -4.342179072  | -4.772836127 |
| O440                              | -7.392148477  | 2.681178069   | -2.806802776 |
| O441                              | -5.453022555  | 3.257999822   | -4.586867523 |
| O442                              | -10.073114664 | 1.237145482   | 0.096001183  |
| O443                              | -6.477537260  | 1.611873557   | 3.121869689  |
| O444                              | -4.847255008  | 5.161407774   | 2.653325107  |
| O445                              | -7.650909796  | 7.217397993   | 3.796377580  |
| O446                              | 9.173049497   | -0.574921641  | 6.695705181  |
| O447                              | 2.634731549   | 4.780110734   | 4.811461879  |
| O448                              | 3.869090405   | 8.645836740   | 0.375769701  |
| O449                              | 1.872910315   | 9.822006417   | -2.917668272 |
| O450                              | -0.782859711  | 7.079635496   | -1.804844804 |
| O451                              | -0.938182878  | 7.841452225   | 2.179714521  |
| O452                              | 2.083932715   | 5.909497440   | 2.186607268  |
| O453                              | 0.554229570   | 12.175948021  | 2.446388072  |
| O454                              | -2.706310448  | 13.962530432  | 0.269967856  |
| O455                              | -2.794402822  | 11.581655030  | -2.359663326 |
| O456                              | -5.566315837  | 13.606634419  | 2.815411065  |
| O457                              | -4.840953244  | 7.062111785   | -2.560212256 |
| O458                              | 3.783877710   | -4.299690564  | -8.219997335 |
| O459                              | 1.716042745   | -0.510628016  | -8.311680582 |
| O460                              | 3.729888761   | 3.970691471   | -7.432018096 |
| O461                              | 8.214572130   | 4.152226291   | -7.007142758 |
| O462                              | -2.794902901  | -2.321773481  | -9.821548857 |
| O463                              | 0.012871168   | -6.366659796  | -6.294851002 |
| O464                              | 2.038520818   | -5.500494210  | -6.637254630 |
| O465                              | -1.856291790  | 2.622176157   | -8.961634017 |
| O466                              | 10.447619465  | -5.289678847  | -1.364119408 |
| O467                              | 12.808988940  | -6.857596102  | 0.643167632  |
| O468                              | -0.151205017  | -6.442745803  | -0.819427111 |
| O469                              | 0.148636558   | -8.455685438  | 0.077029488  |
| O470                              | 5.489947480   | -10.823155484 | -2.257927322 |
| O471                              | 3.399574760   | -10.693722991 | -3.104110812 |
| O472                              | 5.159307205   | -5.804443477  | -0.214067292 |
| O473                              | 4.732486872   | -7.639127804  | 1.024020087  |
| O474                              | 2.998740330   | -6.028321389  | -1.671528975 |
| O475                              | 8.484022496   | -6.636516344  | 2.892375314  |
| O476                              | 6.863902464   | -4.639931813  | 1.692580489  |
| O477                              | -3.615418238  | 4.875468557   | -3.356174474 |
| O478                              | 8.120261438   | -10.364303904 | -0.650495508 |
| O479                              | 7.190463451   | -8.687114239  | 1.495780871  |
| S480                              | 4.652882443   | 5.214671423   | -1.368564275 |
| S481                              | 3.323325315   | 2.287170200   | -2.957394414 |
| S482                              | 2.666796936   | -2.985265574  | -2.906143757 |
| S483                              | 3.881962970   | 2.061743780   | 0.605516838  |
| S484                              | 0.060041006   | -1.845971037  | -1.064432420 |
| S485                              | 5.351973266   | -0.613169788  | -4.524363046 |
| S486                              | 3.242792110   | -3.382695176  | 0.370125159  |
| S487                              | 6.611375210   | 1.612808315   | -1.599316254 |
| S488                              | 6.237107907   | -3.089340783  | -1.753254166 |
| S489                              | 6.085098899   | -0.970784709  | 1.248798905  |
| <b>5, 47(1/2)</b>                 |               |               |              |
| <b>FeI 1.42</b>                   |               |               |              |
| <b>bm12b2n2x6x2n2nas471.car_4</b> |               |               |              |
| C1                                | -7.418526545  | 3.323162180   | 4.976630375  |
| C2                                | -7.503958807  | 2.968284844   | 6.463961234  |

|     |       |     |               |              |              |
|-----|-------|-----|---------------|--------------|--------------|
| Fe2 | -0.01 | C3  | -8.608230925  | 3.452784091  | 2.830834997  |
| Fe3 | 2.81  | C4  | -8.191898706  | 4.858014319  | 2.403407524  |
| Fe4 | -2.49 | C5  | -8.088957215  | 7.235271628  | 2.952812459  |
| Fe5 | 2.38  | C6  | -6.571213350  | 7.448558712  | 2.950214841  |
| Fe6 | -1.12 | C7  | -4.403663927  | 6.712128602  | 3.818408155  |
| Fe7 | -2.28 | C8  | -3.772255897  | 6.022476502  | 2.604784034  |
|     |       | C9  | -3.869755760  | 4.182528565  | 1.006282922  |
|     |       | C10 | -4.086063168  | 5.004694340  | -0.274240991 |
|     |       | C11 | -5.477162793  | 6.553344465  | -1.516824780 |
|     |       | C12 | -4.632042852  | 7.834193441  | -1.561358262 |
|     |       | C13 | -3.965920904  | 9.875031132  | -0.382403222 |
|     |       | C14 | -2.458324191  | 9.952260018  | -0.110699266 |
|     |       | C15 | -0.531819183  | 8.975247963  | 1.064981895  |
|     |       | C16 | 0.384580924   | 7.961675937  | 0.370342632  |
|     |       | C17 | 0.435327338   | 5.984822084  | -1.141657802 |
|     |       | C18 | 0.331496944   | 6.205428231  | -2.661474069 |
|     |       | C19 | -0.070451892  | 4.594196259  | -0.687854526 |
|     |       | C20 | 0.430446887   | 3.492234448  | -1.625968316 |
|     |       | C21 | 0.311966919   | 4.332283540  | 0.773822332  |
|     |       | C22 | -1.085690129  | 6.166109430  | -4.663789138 |
|     |       | C23 | -1.021651464  | 7.629950282  | -5.131758928 |
|     |       | C24 | -2.377119484  | 5.441722715  | -5.115524431 |
|     |       | C25 | -2.621512020  | 5.632963733  | -6.616826455 |
|     |       | C26 | -2.312707902  | 3.947350260  | -4.770794090 |
|     |       | C27 | -1.711772058  | 9.925809395  | -4.786545352 |
|     |       | C28 | -0.318310828  | 10.499550124 | -4.952842023 |
|     |       | C29 | 6.602634383   | 9.015828517  | 7.572455110  |
|     |       | C30 | 7.050750706   | 7.803585692  | 6.754695150  |
|     |       | C31 | 7.163268671   | 6.923105581  | 4.417731307  |
|     |       | C32 | 8.282206519   | 7.529947730  | 3.548784851  |
|     |       | C33 | 5.928214142   | 6.540392402  | 3.584170601  |
|     |       | C34 | 6.224414872   | 5.529742311  | 2.473884014  |
|     |       | C35 | 4.935473347   | 4.925694191  | 1.913555473  |
|     |       | C36 | 4.854909130   | 3.926573801  | -0.384082505 |
|     |       | C37 | 10.512654781  | 7.171528832  | 2.601310493  |
|     |       | C38 | 10.659153659  | 6.479720874  | 1.262930252  |
|     |       | C39 | -5.039945869  | -0.240719542 | 3.503276653  |
|     |       | C40 | -5.557168215  | -0.514797478 | 2.080236562  |
|     |       | C41 | -3.498482566  | -0.149288923 | 3.418890835  |
|     |       | C42 | -2.776688907  | 0.469182757  | 4.635360776  |
|     |       | C43 | -2.392866337  | -0.517547348 | 5.736416639  |
|     |       | C44 | -6.174701810  | -2.339105606 | 0.522173389  |
|     |       | C45 | -7.417431600  | -1.734373687 | -0.134239077 |
|     |       | C46 | -6.223642868  | -3.889876474 | 0.610747876  |
|     |       | C47 | -9.485290946  | -0.459836779 | 0.206950315  |
|     |       | C48 | -9.124162042  | 0.813112495  | -0.571396395 |
|     |       | C49 | -7.396421163  | 2.458603453  | -1.144164980 |
|     |       | C50 | -6.360021636  | 2.201760548  | -2.240634430 |
|     |       | C51 | -4.930394030  | 0.618668881  | -3.446747146 |
|     |       | C52 | -5.567529464  | 0.647488849  | -4.851731293 |
|     |       | C53 | -4.322661352  | -0.782354241 | -3.274069807 |
|     |       | C54 | -3.546702342  | -1.047044155 | -2.020512842 |
|     |       | C55 | -2.931400002  | -0.193977438 | -1.128807720 |
|     |       | C56 | -2.563803512  | -2.296181959 | -0.533698661 |
|     |       | C57 | -7.518178873  | -0.109128977 | -6.151531946 |
|     |       | C58 | -7.602338293  | 1.161740251  | -6.992054459 |
|     |       | C59 | -8.930907147  | -0.640202218 | -5.812667702 |
|     |       | C60 | -9.616975218  | -1.435646183 | -6.883995970 |
|     |       | C61 | -9.659230090  | -1.267080104 | -8.254205282 |
|     |       | C62 | -10.840544968 | -3.045129410 | -7.658004951 |
|     |       | C63 | 8.744157299   | 2.622955048  | -3.897114554 |
|     |       | C64 | 9.782811038   | 3.051039237  | -2.875288568 |

|      |              |              |               |
|------|--------------|--------------|---------------|
| C65  | 7.371174421  | 2.676714721  | -3.187962952  |
| C66  | 6.212351622  | 2.352272712  | -4.100978791  |
| C67  | 5.547931752  | 3.357705116  | -4.826905899  |
| C68  | 5.752510743  | 1.029846716  | -4.237008660  |
| C69  | 4.460572535  | 3.057832232  | -5.655523967  |
| C70  | 4.677231386  | 0.713437721  | -5.067172905  |
| C71  | 4.029657034  | 1.729780189  | -5.774350686  |
| C72  | 5.071261870  | -4.335064356 | -6.284537518  |
| C73  | 3.936303580  | -5.143522111 | -6.930677675  |
| C74  | 4.511818047  | -3.389077309 | -5.209227202  |
| C75  | 2.859385033  | -7.341746575 | -7.140521207  |
| C76  | 1.474230090  | -7.170124438 | -6.515829305  |
| C77  | 0.155067111  | -6.204761846 | -4.666093507  |
| C78  | -0.462957168 | -4.886857765 | -5.182133823  |
| C79  | 0.372245409  | -6.215907875 | -3.141769111  |
| C80  | -0.848694290 | -5.952472939 | -2.252378233  |
| C81  | -1.912785836 | -7.063248477 | -2.176938143  |
| C82  | -3.386891569 | -7.687834410 | -4.097730480  |
| C83  | -0.154639031 | -2.586300950 | -5.919746427  |
| C84  | -0.413473647 | -2.581789222 | -7.438350186  |
| C85  | 0.728102802  | -1.377244980 | -5.584672732  |
| C86  | 0.518931205  | -3.166470135 | -9.621778688  |
| C87  | -0.287177133 | -4.033001227 | -10.585752089 |
| C88  | -1.900757297 | -5.867915852 | -10.871922624 |
| C89  | -3.259633271 | -5.382442616 | -11.417557119 |
| C90  | -2.060716179 | -7.221932557 | -10.143777015 |
| C91  | -2.925268240 | -7.094267194 | -8.893180265  |
| C92  | -5.086032972 | -3.754930488 | -11.201940692 |
| C93  | -5.160597406 | -3.249649757 | -12.637555977 |
| C94  | -5.492410857 | -2.623767388 | -10.218620627 |
| C95  | -5.593918752 | -3.101697051 | -8.787952054  |
| C96  | -6.781503229 | -3.679856707 | -8.313699485  |
| C97  | -4.500870803 | -3.020300446 | -7.909215333  |
| C98  | -6.876831884 | -4.181386114 | -7.013269140  |
| C99  | -4.569486965 | -3.537585719 | -6.611979436  |
| C100 | -5.760291098 | -4.118909866 | -6.177790249  |
| C101 | 4.897079055  | -6.200460576 | 7.118108899   |
| C102 | 3.435878164  | -5.887421274 | 6.841866358   |
| C103 | 1.763487917  | -5.432966720 | 5.065822241   |
| C104 | 1.172309711  | -6.532381415 | 4.175527033   |
| C105 | 1.322124498  | -7.643001894 | 1.999228947   |
| C106 | 2.370500832  | -8.161353077 | 1.020090630   |
| C107 | 4.587924230  | -7.957580067 | 0.009627287   |
| C108 | 5.554709347  | -8.999499024 | 0.538408884   |
| C109 | -1.942800121 | -6.578224042 | 7.494680329   |
| C110 | -3.073475396 | -6.803003623 | 6.481425827   |
| C111 | -1.484619338 | -5.102618072 | 7.442763371   |
| C112 | -0.624576919 | -4.738503179 | 8.666552060   |
| C113 | 0.037027704  | -3.392345046 | 8.472241545   |
| C114 | -3.688240402 | -7.276871294 | 4.157301686   |
| C115 | -3.273492168 | -8.434084777 | 3.269008835   |
| C116 | -4.098669768 | -5.989989006 | 3.396706750   |
| C117 | -2.892579341 | -5.189305576 | 2.984840334   |
| C118 | -2.167550755 | -5.514594688 | 1.826630976   |
| C119 | -2.384250956 | -4.200851596 | 3.845031881   |
| C120 | -0.931712334 | -4.910797009 | 1.575984782   |
| C121 | -1.146532010 | -3.601901399 | 3.594907146   |
| C122 | -0.405045588 | -3.980717529 | 2.473830313   |
| C123 | 8.689372361  | -1.244678011 | 6.799028336   |
| C124 | 9.797188523  | -0.299146050 | 6.308522705   |
| C125 | 7.388233653  | -0.495436951 | 7.124436968   |
| C126 | 6.199867730  | -1.352112896 | 7.437135141   |



|       |              |              |              |
|-------|--------------|--------------|--------------|
| C127  | 6.008377506  | -2.166439631 | 8.536001879  |
| C128  | 4.158230524  | -2.119567289 | 7.317707279  |
| C129  | 11.030670610 | 1.779949371  | 6.547662225  |
| C130  | 12.372795752 | 1.089006912  | 6.451129394  |
| C131  | 1.224457935  | 3.124748691  | 6.273855376  |
| C132  | 2.630707012  | 3.168456074  | 5.747928915  |
| C133  | 3.605754983  | 2.142633240  | 6.458803569  |
| C134  | 3.614050429  | 2.407983249  | 7.991540619  |
| C135  | 4.653213228  | 1.538551104  | 8.719356719  |
| C136  | 4.890011013  | 1.947477514  | 10.144481173 |
| C137  | 5.041446564  | 2.472560290  | 5.935884511  |
| C138  | 3.743971224  | -1.576379572 | 1.275180064  |
| Fe139 | 4.134842903  | -2.453333903 | 3.064649867  |
| Fe140 | 2.201115287  | -1.194434427 | -0.248395424 |
| Fe141 | 5.048809371  | -1.382125993 | -0.218784647 |
| Fe142 | 3.967318912  | -3.472038068 | 0.758821527  |
| Fe143 | 3.890804783  | -3.427411337 | -1.848260978 |
| Fe144 | 5.025583906  | -0.274293154 | 2.068250037  |
| Fe145 | 2.497013756  | -0.490620023 | 2.709550183  |
| H146  | -5.565393769 | 3.413370519  | 6.910963296  |
| H147  | -5.838664891 | 1.813390257  | 6.737933597  |
| H148  | -9.386374835 | 2.792912699  | 4.710130476  |
| H149  | -8.197846761 | 2.124812165  | 6.603064317  |
| H150  | -7.974329210 | 3.836458767  | 6.959218540  |
| H151  | -7.938140966 | 2.755581919  | 2.307989055  |
| H152  | -8.975433560 | 5.662074755  | 4.123218275  |
| H153  | -9.632078162 | 3.270665033  | 2.477139063  |
| H154  | -8.537246121 | 7.900722813  | 3.702710830  |
| H155  | -6.321629366 | 5.903035039  | 4.281535342  |
| H156  | -8.454051475 | 7.539072631  | 1.963206264  |
| H157  | -2.791959203 | 3.984107127  | 1.071443175  |
| H158  | -5.093856785 | 4.441053720  | 2.760776734  |
| H159  | -4.048475973 | 6.230627516  | 4.740121777  |
| H160  | -5.256407133 | 5.982527741  | -2.427142046 |
| H161  | -5.959681038 | 5.618506730  | 0.362395161  |
| H162  | -4.056135700 | 7.751831921  | 3.813982675  |
| H163  | -4.392879118 | 3.218438134  | 0.924387331  |
| H164  | -5.104948679 | 8.251570350  | 0.411426770  |
| H165  | -6.539721443 | 6.833523501  | -1.524135393 |
| H166  | -0.087729330 | 5.115162670  | 1.435432772  |
| H167  | -0.099624591 | 3.367137500  | 1.107334861  |
| H168  | 1.403484573  | 4.285713136  | 0.903635663  |
| H169  | -1.169826923 | 4.612090626  | -0.747121074 |
| H170  | -4.468335126 | 10.468639256 | 0.395471387  |
| H171  | -2.246377456 | 3.768753895  | -3.688892008 |
| H172  | -2.309290078 | 8.243602457  | -3.617826839 |
| H173  | -2.767752330 | 6.689433482  | -6.885703709 |
| H174  | 0.096740653  | 2.510873893  | -1.260985269 |
| H175  | 1.527535139  | 3.471915249  | -1.670127871 |
| H176  | 8.741426640  | 3.383850749  | -4.701823364 |
| H177  | -3.217876028 | 3.438259158  | -5.131991642 |
| H178  | -3.520610847 | 5.076553857  | -6.919182087 |
| H179  | -1.440010032 | 3.476966744  | -5.253172125 |
| H180  | -1.771486264 | 5.250467959  | -7.204589242 |
| H181  | -3.223534458 | 5.893555740  | -4.567198882 |
| H182  | -0.220747201 | 5.683653420  | -5.145468826 |
| H183  | -1.693066556 | 5.749259699  | -2.642388219 |
| H184  | 0.045955702  | 3.616680821  | -2.647673524 |
| H185  | 1.019097825  | -1.431436102 | -4.523499799 |
| H186  | 0.108265593  | -0.478886788 | -5.735026380 |
| H187  | 2.203944319  | -0.424194525 | -6.451312389 |
| H188  | 2.550094915  | 2.162714347  | -6.955688963 |

|      |               |              |              |
|------|---------------|--------------|--------------|
| H189 | 4.316209751   | -0.312197083 | -5.137619580 |
| H190 | 6.216158021   | 0.234692025  | -3.649441293 |
| H191 | 5.873881748   | 4.397722130  | -4.736396096 |
| H192 | -1.257942751  | 7.112641987  | -0.477513238 |
| H193 | -0.461045489  | 8.785541869  | 2.146269496  |
| H194 | -0.120394874  | 9.974214056  | 0.869007803  |
| H195 | -2.532108623  | 8.253839266  | 1.084912412  |
| H196 | -4.129353339  | 10.369312273 | -1.348558501 |
| H197 | 3.946954568   | 3.854044356  | -6.201385613 |
| H198 | 1.502761502   | 6.086827141  | -0.905234149 |
| H199 | -2.272408321  | 10.084539930 | -5.722633300 |
| H200 | -2.205376951  | 10.507579985 | -3.991742074 |
| H201 | 0.472203688   | 10.000413498 | -4.345322062 |
| H202 | 11.440156800  | 7.047372059  | 3.180429503  |
| H203 | -0.918130096  | -0.922846175 | 7.099559830  |
| H204 | 1.707122582   | 4.567254980  | 7.461634248  |
| H205 | -1.268364414  | -4.681081432 | 9.556693625  |
| H206 | 0.136604725   | -5.512761163 | 8.839598088  |
| H207 | -2.359558780  | -4.434717074 | 7.410493768  |
| H208 | -2.652874077  | -9.204056467 | 3.784522811  |
| H209 | -2.431933199  | -6.736636725 | 8.468239946  |
| H210 | -3.099966208  | -1.157828268 | 3.221432646  |
| H211 | -3.412762872  | 1.241846717  | 5.101767612  |
| H212 | -1.704423273  | -7.086066473 | 4.950713483  |
| H213 | -4.593827828  | -7.649274109 | 4.676887882  |
| H214 | -0.298481035  | -7.422050722 | 6.548853227  |
| H215 | -0.581847002  | 0.457782479  | 6.061263836  |
| H216 | -0.927989461  | -4.935872034 | 6.507632614  |
| H217 | -0.285008274  | -7.566370946 | 8.190484359  |
| H218 | -6.338139639  | -1.020008363 | 4.904603920  |
| H219 | -3.260716948  | 0.469036334  | 2.540891769  |
| H220 | 1.689152979   | -4.340677666 | 7.976071996  |
| H221 | -1.873258249  | 0.990678446  | 4.287829606  |
| H222 | -4.147768692  | 1.390565913  | -3.446873369 |
| H223 | -2.869110509  | 0.887904022  | -1.075464077 |
| H224 | -8.266095967  | 2.925574124  | -1.626029992 |
| H225 | -7.199484249  | 0.836185840  | 0.226347812  |
| H226 | -7.309635558  | -0.049539917 | -4.021305586 |
| H227 | -9.200545971  | -0.537692328 | -8.913328034 |
| H228 | -7.726872621  | 2.094341904  | -6.390176993 |
| H229 | -9.561174226  | 0.202004063  | -5.476249322 |
| H230 | -6.955040236  | -0.866717040 | -6.721172604 |
| H231 | -11.468865428 | -3.926459964 | -7.757080585 |
| H232 | -3.668323049  | -0.952780936 | -4.144869361 |
| H233 | -5.130772226  | -1.528672192 | -3.343966902 |
| H234 | -10.664735641 | -2.476998491 | -9.703978100 |
| H235 | -8.829242276  | -1.314299594 | -4.947458797 |
| H236 | -6.260688019  | 0.173579029  | -1.811956613 |
| H237 | -6.968757695  | 3.206683923  | -0.460740586 |
| H238 | -10.108438726 | -1.064371350 | -0.466353812 |
| H239 | -2.187010739  | -3.137329784 | 0.042541301  |
| H240 | -10.108636247 | -0.168006293 | 1.063695359  |
| H241 | 9.833397600   | 1.293981628  | -5.012211982 |
| H242 | 8.254350847   | 0.894486055  | -4.877027087 |
| H243 | 1.352954291   | -3.880116220 | -5.049069875 |
| H244 | -1.134626168  | -2.422924227 | -5.447735466 |
| H245 | 1.158871741   | -3.865961449 | -7.734844618 |
| H246 | -4.056555563  | -3.736898693 | -2.257079512 |
| H247 | -5.787288506  | -4.475590105 | -1.246343599 |
| H248 | -5.026409570  | -4.307981448 | -3.393376141 |
| H249 | -5.246719790  | -4.213461278 | 1.016103200  |
| H250 | -6.997611562  | -4.175243244 | 1.341757520  |

|      |              |              |               |
|------|--------------|--------------|---------------|
| H251 | -1.057794395 | -7.608051348 | -9.909722973  |
| H252 | -2.554324652 | -7.915615925 | -10.836418499 |
| H253 | -1.244620773 | -7.089882840 | -7.618235404  |
| H254 | -2.784534651 | -6.707330846 | -6.890164600  |
| H255 | -3.151114165 | -9.501975047 | -5.015240649  |
| H256 | -2.351635097 | -7.087820913 | -1.168945635  |
| H257 | -7.813285307 | -4.619949664 | -6.658620602  |
| H258 | -3.568786013 | -2.539254795 | -8.220925074  |
| H259 | -4.716684476 | -6.352386655 | -4.929130937  |
| H260 | 1.131330776  | -5.459103048 | -2.889253174  |
| H261 | 2.266769749  | -6.065245498 | -4.967220928  |
| H262 | -1.330701870 | -4.998862394 | -2.518581876  |
| H263 | -8.179033983 | -1.262905104 | 1.705120874   |
| H264 | 3.167026817  | -8.386475880 | -6.995164694  |
| H265 | -5.819788398 | -2.399197705 | 2.688079521   |
| H266 | 0.807898642  | -7.195144789 | -2.881127737  |
| H267 | -3.693969660 | -3.515048274 | -5.960075417  |
| H268 | 2.736830743  | -7.170565832 | -8.218507804  |
| H269 | -2.411668307 | -9.385163327 | -3.460275722  |
| H270 | -4.820950676 | -7.970918034 | -5.522310249  |
| H271 | -4.738963048 | -1.441553943 | 5.143102086   |
| H272 | -5.422316067 | 0.765097085  | 3.761423026   |
| H273 | -7.654986415 | -3.737671845 | -8.968197565  |
| H274 | -5.348533894 | -2.058473678 | -0.148121305  |
| H275 | -0.560528605 | -6.985246966 | -4.956403720  |
| H276 | -1.446930180 | -8.043672582 | -2.340277080  |
| H277 | -0.454055820 | -5.813674189 | -1.236952428  |
| H278 | -3.572686025 | -5.991172009 | -2.984688483  |
| H279 | 0.249977400  | -2.121926389 | -9.841630278  |
| H280 | -1.213095418 | -4.992726013 | -9.024310348  |
| H281 | -1.279284638 | -6.034262041 | -11.763856839 |
| H282 | 1.575798558  | -3.307123962 | -9.888399683  |
| H283 | -3.207144593 | -3.769384240 | -10.164080853 |
| H284 | 5.323076680  | -6.766582526 | 6.277253791   |
| H285 | 5.415766171  | -5.220056943 | 7.142005904   |
| H286 | 8.502434222  | -1.932759023 | 5.961731178   |
| H287 | 5.999435409  | -6.953591252 | 8.661044948   |
| H288 | 4.477281180  | -6.515393924 | 9.083989154   |
| H289 | 5.356731308  | -2.890746881 | -4.719527095  |
| H290 | 5.116342994  | -2.971949532 | -7.797717689  |
| H291 | 4.575004078  | -6.843118211 | -5.962510666  |
| H292 | 3.879686963  | -2.636146171 | -5.701135634  |
| H293 | 6.240629328  | -4.150939199 | -7.965963265  |
| H294 | 5.164230862  | -7.073122509 | -0.304839951  |
| H295 | 5.787020904  | -5.027656590 | -5.812759350  |
| H296 | 5.484562052  | 7.456779657  | 3.159457369   |
| H297 | 7.535338031  | 6.031897977  | 4.936808120   |
| H298 | 3.784693590  | -6.710455706 | 1.529621868   |
| H299 | 4.788289217  | 2.826534326  | -2.113742156  |
| H300 | 0.939841331  | -8.508295337 | 2.556833884   |
| H301 | -0.752744814 | -2.843722245 | 4.274969018   |
| H302 | 0.481772563  | -7.274443234 | 1.386821839   |
| H303 | 4.279007519  | 5.695395066  | 1.485681063   |
| H304 | 2.410781692  | -5.884841860 | 2.693618264   |
| H305 | 4.364995665  | 4.443575880  | 2.722789304   |
| H306 | 5.193239659  | 6.113758834  | 4.285746782   |
| H307 | 6.838089078  | 4.702206151  | 2.861381912   |
| H308 | 6.792611037  | 6.005815887  | 1.658246761   |
| H309 | -4.739510158 | -5.397650841 | 4.065921477   |
| H310 | 6.392815585  | 8.797271479  | 5.149460567   |
| H311 | 5.747082946  | 8.676895915  | 8.176490554   |
| H312 | 0.576900721  | -3.548742674 | 2.285003775   |

|       |              |              |               |
|-------|--------------|--------------|---------------|
| H313  | 6.986749287  | 10.791728685 | 6.600132388   |
| H314  | 5.477761511  | 10.705706161 | 7.232414063   |
| H315  | 5.529243335  | 2.991556051  | 1.262575133   |
| H316  | -0.353725694 | -5.158425987 | 0.684739031   |
| H317  | -2.956180684 | -3.907724646 | 4.728472190   |
| H318  | 8.510425939  | 3.403565950  | 8.573591625   |
| H319  | 7.568927325  | 0.165527618  | 7.990450638   |
| H320  | 7.187399420  | 3.829115235  | 6.583306102   |
| H321  | 7.871311510  | 2.733135723  | 9.809816112   |
| H322  | 5.346620219  | -9.362577109 | 1.573815886   |
| H323  | 6.845672588  | 2.061196176  | 4.026245327   |
| H324  | 3.055167375  | 4.179389483  | 5.842805059   |
| H325  | 3.829840328  | -5.786355102 | 4.829572156   |
| H326  | 3.847933160  | 3.471599505  | 8.159399951   |
| H327  | 4.247288160  | -3.246377177 | 9.106877371   |
| H328  | 3.135348948  | -2.306988301 | 7.013505202   |
| H329  | 7.421357418  | 9.229213409  | 8.280754865   |
| H330  | 5.328414240  | 1.935324010  | -0.681017440  |
| H331  | 8.823916003  | 3.427580673  | 3.933452936   |
| H332  | 7.432634863  | 1.608688882  | 2.659992370   |
| H333  | 9.363991221  | 5.762446826  | 3.757807854   |
| H334  | 4.504111299  | 5.949180430  | -0.518615041  |
| H335  | 4.023966417  | 2.153115183  | 11.813911219  |
| H336  | 4.319147307  | 0.490549998  | 8.698707481   |
| H337  | 5.623922777  | 1.590121032  | 8.213201544   |
| H338  | 2.613141063  | 2.200447005  | 8.397603007   |
| H339  | 1.828288578  | -4.478233863 | 4.520602107   |
| H340  | -2.567417094 | -6.266913834 | 1.142646043   |
| H341  | -4.702907036 | -6.301766398 | 2.530945630   |
| H342  | 2.610327070  | 2.878801733  | 4.688920931   |
| H343  | 9.017908460  | 4.075700441  | 5.332133078   |
| H344  | 7.957549021  | 5.101153148  | 7.040305530   |
| H345  | 4.180432706  | 5.060964747  | -1.946534013  |
| H346  | 6.669772507  | -2.436380985 | 9.351205985   |
| H347  | 7.129304803  | 0.156267826  | 6.280497930   |
| H348  | 1.108936749  | -5.309994586 | 5.930923692   |
| H349  | 4.097728420  | -8.372491544 | -0.885063070  |
| H350  | 7.250692979  | 3.688496361  | -2.773377688  |
| H351  | 7.389678667  | 1.971766736  | -2.342390302  |
| H352  | 9.979272077  | -2.590048391 | 7.657025396   |
| H353  | 9.467675556  | -1.433872849 | 8.696699764   |
| H354  | 11.124815071 | 2.569832200  | 7.308796889   |
| H355  | 9.351950800  | 1.184828945  | 7.718778368   |
| H356  | 12.501128611 | 0.214507863  | 7.133738572   |
| H357  | 10.793126921 | 2.267201849  | 5.588576533   |
| H358  | 10.116716710 | 2.234047504  | -2.190981369  |
| H359  | -4.177630388 | -3.009577073 | -13.107914323 |
| H360  | 10.378375032 | 8.247402694  | 2.392180180   |
| H361  | 9.705415925  | 6.112852330  | 0.812037727   |
| H362  | -5.805617842 | -4.585032225 | -11.108612005 |
| H363  | -4.760824434 | -1.803695201 | -10.298131660 |
| H364  | -6.460075441 | -2.229026487 | -10.560640619 |
| H365  | 1.499430214  | 0.464154136  | 3.334025374   |
| H366  | -6.708306183 | -4.928207738 | -4.681534131  |
| H367  | 0.187002546  | 0.247365625  | 1.311333604   |
| H368  | -1.689930328 | -0.727190893 | 0.556159196   |
| Mo369 | 4.291617492  | -0.209727036 | 4.682277127   |
| N370  | 2.480497060  | 1.755193515  | -0.122187907  |
| N371  | 2.382060854  | 0.637758683  | -0.159987023  |
| N372  | -6.240473786 | 2.673031807  | 7.120229231   |
| N373  | -8.579062759 | 3.227921896  | 4.271005950   |
| N374  | -8.493549180 | 5.871545147  | 3.252605911   |

|      |               |              |               |
|------|---------------|--------------|---------------|
| N375 | -5.858830792  | 6.683052287  | 3.814136198   |
| N376 | -4.339991371  | 4.854811980  | 2.210692129   |
| N377 | -5.228439889  | 5.732157989  | -0.343211394  |
| N378 | -4.569768729  | 8.551999462  | -0.407662053  |
| N379 | -1.926268946  | 8.962291075  | 0.658307434   |
| N380 | -0.242541297  | 7.061952969  | -0.427802111  |
| N381 | -0.907857737  | 6.063858868  | -3.215048201  |
| N382 | -1.689882129  | 8.537202432  | -4.375683373  |
| N383 | 6.196172744   | 10.162252887 | 6.752398709   |
| N384 | 6.797519356   | 7.899285754  | 5.436139490   |
| N385 | 5.201533271   | 3.895647414  | 0.908837568   |
| N386 | 4.324339651   | 5.044053740  | -0.941191962  |
| N387 | 5.001341786   | 2.824587822  | -1.120690639  |
| N388 | 9.355841658   | 6.724613701  | 3.353681986   |
| N389 | -5.473951692  | -1.289957342 | 4.430334713   |
| N390 | -1.208469406  | -0.298347450 | 6.341516590   |
| N391 | -5.910109669  | -1.803078135 | 1.852999669   |
| N392 | -8.362021635  | -1.232561831 | 0.705185321   |
| N393 | -7.866870533  | 1.305174602  | -0.401314548  |
| N394 | -5.898837915  | 0.927741733  | -2.397887449  |
| N395 | -3.312652333  | -2.357842392 | -1.631286850  |
| N396 | -2.326011711  | -1.007275541 | -0.193199500  |
| N397 | -6.847116405  | 0.191247156  | -4.894887941  |
| N398 | -10.359389973 | -2.549935006 | -6.525130549  |
| N399 | -10.440029265 | -2.300554199 | -8.728388905  |
| N400 | 9.051721524   | 1.265505540  | -4.352684131  |
| N401 | 5.803823637   | -3.529128969 | -7.277733945  |
| N402 | 3.896768175   | -6.471692844 | -6.622433204  |
| N403 | 1.417648492   | -6.524312761 | -5.330888805  |
| N404 | -3.024245816  | -6.870361979 | -3.115598738  |
| N405 | -2.839666792  | -8.913688394 | -4.249062860  |
| N406 | -4.270684556  | -7.268203154 | -5.034877055  |
| N407 | 0.383857815   | -3.846660447 | -5.415043302  |
| N408 | 0.363925787   | -3.411603090 | -8.194982592  |
| N409 | -1.198305767  | -4.893300195 | -10.041127189 |
| N410 | -2.244566701  | -6.888762701 | -7.735832347  |
| N411 | -3.749752831  | -4.236594492 | -10.886445560 |
| N412 | 5.024978248   | -6.979765320 | 8.353641871   |
| N413 | 3.092376718   | -5.794029515 | 5.544695650   |
| N414 | 1.739842908   | -6.637110667 | 2.958317564   |
| N415 | 3.585356681   | -7.556850171 | 0.979543611   |
| N416 | -0.892613795  | -7.596055252 | 7.369131704   |
| N417 | -2.698327416  | -7.084378909 | 5.203312764   |
| N418 | 9.154725623   | -2.053832964 | 7.942723463   |
| N419 | 5.030087413   | -1.343022327 | 6.679891823   |
| N420 | 4.716624733   | -2.638494994 | 8.441083622   |
| N421 | 9.983617540   | 0.870083681  | 6.982510541   |
| N422 | 0.038122982   | -1.128544383 | -2.274038009  |
| N423 | 0.867376507   | -1.151742346 | -1.514315432  |
| O424 | -6.367566704  | 3.735748430  | 4.449976379   |
| O425 | -7.614561853  | 5.044004552  | 1.320382478   |
| O426 | -6.055526611  | 8.307016753  | 2.215065442   |
| O427 | -2.802138167  | 6.519511391  | 2.010491068   |
| O428 | -3.250362579  | 4.997637268  | -1.191314713  |
| O429 | -4.078038966  | 8.201970550  | -2.611235605  |
| O430 | -1.805624249  | 10.908003800 | -0.552552965  |
| O431 | 1.606888465   | 7.991770072  | 0.576997176   |
| O432 | 1.330472159   | 6.487643264  | -3.338694373  |
| O433 | -0.392434496  | 7.965401215  | -6.148849648  |
| O434 | -0.076158195  | 11.478081486 | -5.643537547  |
| O435 | 7.584616211   | 6.832880630  | 7.332830579   |
| O436 | 8.176004926   | 8.680664723  | 3.088751414   |

|  |                   |              |                                 |               |             |             |
|--|-------------------|--------------|---------------------------------|---------------|-------------|-------------|
|  | O437              | 11.729012469 | 6.337654099                     | 0.691496655   |             |             |
|  | O438              | -5.616527703 | 0.381854020                     | 1.214040584   |             |             |
|  | O439              | -3.144344520 | -1.460393143                    | 6.071250926   |             |             |
|  | O440              | -7.520759236 | -1.667584106                    | -1.369864440  |             |             |
|  | O441              | -6.542204235 | -4.536574153                    | -0.601438621  |             |             |
|  | O442              | -9.985367092 | 1.345011284                     | -1.288009469  |             |             |
|  | O443              | -5.971684121 | 3.143905347                     | -2.942367732  |             |             |
|  | O444              | -4.935490253 | 0.969249124                     | -5.863796421  |             |             |
|  | O445              | -7.589377032 | 1.186688596                     | -8.211905601  |             |             |
|  | O446              | 10.215609369 | 4.190043570                     | -2.769954964  |             |             |
|  | O447              | 2.960571629  | 1.367107526                     | -6.570058668  |             |             |
|  | O448              | 3.102387068  | -4.624093741                    | -7.694407748  |             |             |
|  | O449              | 0.484295305  | -7.656977472                    | -7.100117793  |             |             |
|  | O450              | -1.686680760 | -4.819868436                    | -5.386000488  |             |             |
|  | O451              | -1.256945911 | -1.815704658                    | -7.924136088  |             |             |
|  | O452              | 1.878900676  | -1.347481937                    | -6.436172680  |             |             |
|  | O453              | -0.109113890 | -3.923716081                    | -11.806177615 |             |             |
|  | O454              | -3.850560895 | -6.026318702                    | -12.296402764 |             |             |
|  | O455              | -4.165095050 | -7.090742648                    | -8.956781678  |             |             |
|  | O456              | -6.215781451 | -3.082785815                    | -13.228773607 |             |             |
|  | O457              | -5.790523899 | -4.662855581                    | -4.885446193  |             |             |
|  | O458              | 2.634653278  | -5.705532002                    | 7.795192376   |             |             |
|  | O459              | 0.251597833  | -7.278196708                    | 4.578372812   |             |             |
|  | O460              | 2.061502006  | -9.106665678                    | 0.274420851   |             |             |
|  | O461              | 6.501701304  | -9.420603958                    | -0.107143384  |             |             |
|  | O462              | -4.266330189 | -6.707157654                    | 6.817807461   |             |             |
|  | O463              | -0.548139079 | -2.322713190                    | 8.618820135   |             |             |
|  | O464              | 1.323735773  | -3.406337392                    | 8.074809961   |             |             |
|  | O465              | -3.606364964 | -8.570007962                    | 2.100408667   |             |             |
|  | O466              | 10.562149183 | -0.620364582                    | 5.379540488   |             |             |
|  | O467              | 13.292822397 | 1.491124534                     | 5.752259384   |             |             |
|  | O468              | 0.339515821  | 2.368370091                     | 5.902187041   |             |             |
|  | O469              | 0.920622010  | 4.020563296                     | 7.272418767   |             |             |
|  | O470              | 5.962809427  | 2.321239044                     | 10.613687198  |             |             |
|  | O471              | 3.772088113  | 1.859834342                     | 10.912486798  |             |             |
|  | O472              | 5.638724849  | 1.515506600                     | 5.308560788   |             |             |
|  | O473              | 5.552337559  | 3.591691123                     | 6.184743466   |             |             |
|  | O474              | 3.248552271  | 0.843893753                     | 6.171684971   |             |             |
|  | O475              | 9.401070344  | 4.074307462                     | 4.414457961   |             |             |
|  | O476              | 7.457549510  | 2.347906557                     | 3.300572592   |             |             |
|  | O477              | -4.605900979 | -4.550654428                    | -2.540029444  |             |             |
|  | O478              | 8.744684365  | 2.953224811                     | 9.424532952   |             |             |
|  | O479              | 8.094063065  | 4.130837198                     | 6.887352347   |             |             |
|  | S480              | 3.491795637  | -4.241125118                    | -3.928592903  |             |             |
|  | S481              | 2.120864193  | -3.638945478                    | -0.472185988  |             |             |
|  | S482              | 2.519781166  | -1.792010361                    | 4.482118275   |             |             |
|  | S483              | 3.765100615  | -1.198389814                    | -2.044418645  |             |             |
|  | S484              | 0.645454971  | -1.023692962                    | 1.513680252   |             |             |
|  | S485              | 4.279982018  | -4.647221960                    | 2.652804211   |             |             |
|  | S486              | 3.720460529  | 1.327316562                     | 2.923752172   |             |             |
|  | S487              | 5.736279208  | -3.550305627                    | -0.629967314  |             |             |
|  | S488              | 6.065026938  | -1.436465243                    | 3.660812031   |             |             |
|  | S489              | 6.370970429  | 0.312331020                     | 0.398161535   |             |             |
|  | <b>5, 47(3/2)</b> |              | <b>bm12b2n2x6x2n2ndtc.car_5</b> |               |             |             |
|  | Fe1               | 3.20         | C1                              | -7.414842655  | 3.319935046 | 4.975277818 |
|  | Fe2               | 0.05         | C2                              | -7.501236745  | 2.967292400 | 6.463325615 |
|  | Fe3               | 2.83         | C3                              | -8.605965162  | 3.454433938 | 2.830585804 |
|  | Fe4               | -2.65        | C4                              | -8.187686038  | 4.858989595 | 2.403462817 |
|  | Fe5               | 2.35         | C5                              | -8.081978811  | 7.236084799 | 2.953782248 |
|  | Fe6               | -1.11        | C6                              | -6.564303783  | 7.448048425 | 2.950255310 |
|  |                   |              | C7                              | -4.397115591  | 6.709914739 | 3.818254995 |

Fe7 -2.29

|     |               |              |              |
|-----|---------------|--------------|--------------|
| C8  | -3.768086116  | 6.018055763  | 2.604316134  |
| C9  | -3.868696284  | 4.172827417  | 1.011633240  |
| C10 | -4.085644764  | 4.989122801  | -0.272447077 |
| C11 | -5.470356660  | 6.543275201  | -1.516128260 |
| C12 | -4.624062185  | 7.823305475  | -1.561620271 |
| C13 | -3.962406840  | 9.868008042  | -0.386103384 |
| C14 | -2.455610370  | 9.949016215  | -0.111516373 |
| C15 | -0.528152973  | 8.977907442  | 1.068101479  |
| C16 | 0.389556101   | 7.963173323  | 0.376498933  |
| C17 | 0.439586674   | 5.984351653  | -1.133628748 |
| C18 | 0.342825337   | 6.204533154  | -2.653719001 |
| C19 | -0.075078251  | 4.596406384  | -0.680479314 |
| C20 | 0.423766050   | 3.490160983  | -1.615037726 |
| C21 | 0.297682464   | 4.334971640  | 0.784067910  |
| C22 | -1.070004935  | 6.162818018  | -4.660483313 |
| C23 | -1.006563002  | 7.626115833  | -5.130014596 |
| C24 | -2.360874524  | 5.437978763  | -5.112462502 |
| C25 | -2.606766141  | 5.630049211  | -6.612837486 |
| C26 | -2.294727239  | 3.942994195  | -4.768460061 |
| C27 | -1.702279217  | 9.921559435  | -4.793677083 |
| C28 | -0.307438036  | 10.493301319 | -4.953322098 |
| C29 | 6.597317264   | 9.016272304  | 7.570307225  |
| C30 | 7.045907109   | 7.803956817  | 6.751911790  |
| C31 | 7.159858377   | 6.923570464  | 4.415349717  |
| C32 | 8.278576298   | 7.531507567  | 3.546695395  |
| C33 | 5.927209044   | 6.538595837  | 3.579785221  |
| C34 | 6.229535450   | 5.529523695  | 2.469855428  |
| C35 | 4.944949957   | 4.925946585  | 1.898636512  |
| C36 | 4.855633302   | 3.920483217  | -0.396142706 |
| C37 | 10.508676417  | 7.175072283  | 2.597507992  |
| C38 | 10.661142573  | 6.476597147  | 1.263205173  |
| C39 | -5.038696497  | -0.237646026 | 3.488126783  |
| C40 | -5.556252914  | -0.517028424 | 2.066084551  |
| C41 | -3.496342106  | -0.154464740 | 3.405032819  |
| C42 | -2.774236631  | 0.464864102  | 4.620481586  |
| C43 | -2.393817204  | -0.519565986 | 5.724241411  |
| C44 | -6.202889608  | -2.347135949 | 0.525518160  |
| C45 | -7.464677004  | -1.762589884 | -0.115242808 |
| C46 | -6.207365809  | -3.899605196 | 0.618802980  |
| C47 | -9.499098193  | -0.439960340 | 0.235725059  |
| C48 | -9.128073854  | 0.822697105  | -0.555537474 |
| C49 | -7.390888396  | 2.451695004  | -1.145815103 |
| C50 | -6.366224570  | 2.198255374  | -2.253998299 |
| C51 | -4.916135051  | 0.623259739  | -3.451319706 |
| C52 | -5.555867475  | 0.649467196  | -4.855962701 |
| C53 | -4.308744283  | -0.777761630 | -3.278979945 |
| C54 | -3.543144006  | -1.046516560 | -2.019626219 |
| C55 | -2.923943129  | -0.196598008 | -1.126877556 |
| C56 | -2.581504458  | -2.300907785 | -0.524068281 |
| C57 | -7.514306517  | -0.102333947 | -6.149530056 |
| C58 | -7.607500759  | 1.168489547  | -6.989487097 |
| C59 | -8.922281083  | -0.639482513 | -5.803340735 |
| C60 | -9.609330604  | -1.439909785 | -6.870831431 |
| C61 | -9.657989611  | -1.273069740 | -8.241364136 |
| C62 | -10.830612786 | -3.054075167 | -7.637835019 |
| C63 | 8.733204005   | 2.644924997  | -3.891359992 |
| C64 | 9.768901333   | 3.071788389  | -2.866185380 |
| C65 | 7.358231773   | 2.688896739  | -3.186200286 |
| C66 | 6.204608983   | 2.363160946  | -4.105346688 |
| C67 | 5.538005682   | 3.367054431  | -4.832256944 |
| C68 | 5.750431896   | 1.039372481  | -4.243056059 |
| C69 | 4.450962556   | 3.063112329  | -5.660047047 |

|      |              |              |               |
|------|--------------|--------------|---------------|
| C70  | 4.675636157  | 0.719687643  | -5.072568057  |
| C71  | 4.023467548  | 1.733927972  | -5.777337777  |
| C72  | 5.075826340  | -4.337404414 | -6.302472121  |
| C73  | 3.939467490  | -5.144864047 | -6.944042603  |
| C74  | 4.512674407  | -3.423136782 | -5.204028865  |
| C75  | 2.860051358  | -7.341848097 | -7.146590988  |
| C76  | 1.476792142  | -7.167186639 | -6.516464749  |
| C77  | 0.159036195  | -6.207757394 | -4.665780887  |
| C78  | -0.459793860 | -4.888454708 | -5.174216986  |
| C79  | 0.373018136  | -6.228564162 | -3.140624379  |
| C80  | -0.848731248 | -5.972042064 | -2.250230981  |
| C81  | -1.915861945 | -7.080670783 | -2.183639251  |
| C82  | -3.392565208 | -7.698400224 | -4.104035586  |
| C83  | -0.152694055 | -2.585550612 | -5.909717829  |
| C84  | -0.413838480 | -2.580898437 | -7.428207250  |
| C85  | 0.727671595  | -1.375209211 | -5.576105374  |
| C86  | 0.516705167  | -3.160578910 | -9.614380506  |
| C87  | -0.286373253 | -4.028001740 | -10.580212422 |
| C88  | -1.895507271 | -5.866082158 | -10.871173006 |
| C89  | -3.253210384 | -5.380140583 | -11.419550707 |
| C90  | -2.057103710 | -7.220619691 | -10.143981191 |
| C91  | -2.923064339 | -7.093594654 | -8.894769172  |
| C92  | -5.078079516 | -3.750946371 | -11.206210027 |
| C93  | -5.150494469 | -3.244068880 | -12.640878331 |
| C94  | -5.485577000 | -2.620861604 | -10.221763639 |
| C95  | -5.586343166 | -3.100135122 | -8.791688816  |
| C96  | -6.770737345 | -3.688681065 | -8.321830495  |
| C97  | -4.496938012 | -3.009836343 | -7.909605219  |
| C98  | -6.866280786 | -4.190822515 | -7.021709752  |
| C99  | -4.565701928 | -3.527857334 | -6.612658237  |
| C100 | -5.753026139 | -4.118720075 | -6.182058045  |
| C101 | 4.893932420  | -6.205977416 | 7.117435017   |
| C102 | 3.433046155  | -5.889186551 | 6.844123729   |
| C103 | 1.761051099  | -5.431602626 | 5.067932872   |
| C104 | 1.169323973  | -6.527295250 | 4.173988996   |
| C105 | 1.318555931  | -7.635355783 | 1.996890361   |
| C106 | 2.364861377  | -8.155913894 | 1.017227437   |
| C107 | 4.583658309  | -7.961471706 | 0.007316148   |
| C108 | 5.550639142  | -9.001585692 | 0.538837004   |
| C109 | -1.941183264 | -6.577393080 | 7.495432636   |
| C110 | -3.073772056 | -6.802925049 | 6.483387076   |
| C111 | -1.484104141 | -5.102290116 | 7.441623940   |
| C112 | -0.623567704 | -4.735449242 | 8.664207073   |
| C113 | 0.036661835  | -3.389189958 | 8.466781272   |
| C114 | -3.692162184 | -7.268735315 | 4.158862394   |
| C115 | -3.279163047 | -8.424772821 | 3.267909575   |
| C116 | -4.107429016 | -5.981787303 | 3.401481160   |
| C117 | -2.902391254 | -5.183694176 | 2.984447461   |
| C118 | -2.183150112 | -5.511082102 | 1.823475769   |
| C119 | -2.388085306 | -4.197136193 | 3.843108822   |
| C120 | -0.945415003 | -4.912742634 | 1.570184616   |
| C121 | -1.148305328 | -3.603612484 | 3.590139226   |
| C122 | -0.411524562 | -3.986252895 | 2.467436404   |
| C123 | 8.687654459  | -1.243116508 | 6.794766227   |
| C124 | 9.796749381  | -0.297596443 | 6.307105537   |
| C125 | 7.387621711  | -0.493882425 | 7.125018127   |
| C126 | 6.198532276  | -1.350858302 | 7.433456312   |
| C127 | 6.006244113  | -2.170373318 | 8.528532541   |
| C128 | 4.157152255  | -2.117040595 | 7.309465421   |
| C129 | 11.031428707 | 1.780715328  | 6.549431154   |
| C130 | 12.373740817 | 1.089839317  | 6.458521534   |
| C131 | 1.224106599  | 3.131423004  | 6.275472442   |



|       |              |              |              |
|-------|--------------|--------------|--------------|
| C132  | 2.629715566  | 3.171358475  | 5.746655552  |
| C133  | 3.603563810  | 2.144072905  | 6.457117410  |
| C134  | 3.608335380  | 2.404262193  | 7.990843720  |
| C135  | 4.647782671  | 1.535374901  | 8.718946266  |
| C136  | 4.883846645  | 1.945641192  | 10.144177239 |
| C137  | 5.040268278  | 2.474596919  | 5.938180626  |
| C138  | 3.748027739  | -1.579583146 | 1.274920255  |
| Fe139 | 4.140997039  | -2.444637939 | 3.069404121  |
| Fe140 | 2.207212203  | -1.198397355 | -0.240733505 |
| Fe141 | 5.041322473  | -1.384084499 | -0.230521734 |
| Fe142 | 3.971619889  | -3.493420274 | 0.781913136  |
| Fe143 | 3.763412986  | -3.277870218 | -1.838293626 |
| Fe144 | 5.035075469  | -0.278885385 | 2.062448748  |
| Fe145 | 2.502259743  | -0.488783747 | 2.708707470  |
| H146  | -5.562499141 | 3.412003365  | 6.912794588  |
| H147  | -5.836240937 | 1.811504726  | 6.739611629  |
| H148  | -9.385566072 | 2.798422783  | 4.710784019  |
| H149  | -8.195618471 | 2.124653834  | 6.602969007  |
| H150  | -7.971303629 | 3.835953047  | 6.956959194  |
| H151  | -7.937331800 | 2.756274312  | 2.306906996  |
| H152  | -8.969942494 | 5.663023397  | 4.124005358  |
| H153  | -9.630397057 | 3.274657503  | 2.477451733  |
| H154  | -8.529747665 | 7.901501794  | 3.703831047  |
| H155  | -6.316423015 | 5.905163889  | 4.285023117  |
| H156  | -8.447389529 | 7.540210395  | 1.964479423  |
| H157  | -2.790628908 | 3.974603184  | 1.076040637  |
| H158  | -5.089446353 | 4.436659887  | 2.766643531  |
| H159  | -4.041910357 | 6.228880743  | 4.740066047  |
| H160  | -5.248425713 | 5.970861089  | -2.425448514 |
| H161  | -5.954125203 | 5.615994475  | 0.366091607  |
| H162  | -4.047909828 | 7.748826987  | 3.812464040  |
| H163  | -4.391363921 | 3.207826017  | 0.933997655  |
| H164  | -5.100524759 | 8.245066831  | 0.409443878  |
| H165  | -6.533103529 | 6.824288978  | -1.525972717 |
| H166  | -0.115297341 | 5.113261156  | 1.443130537  |
| H167  | -0.109076286 | 3.365814303  | 1.112306298  |
| H168  | 1.388309142  | 4.297430890  | 0.924299269  |
| H169  | -1.174204879 | 4.618780811  | -0.744538194 |
| H170  | -4.467337869 | 10.462805838 | 0.389597112  |
| H171  | -2.227654008 | 3.764237686  | -3.686692702 |
| H172  | -2.304935086 | 8.240107289  | -3.624268016 |
| H173  | -2.754626196 | 6.686485679  | -6.880925741 |
| H174  | 0.086771987  | 2.510543884  | -1.247386415 |
| H175  | 1.520909043  | 3.466128577  | -1.660208416 |
| H176  | 8.727639511  | 3.410730109  | -4.691747058 |
| H177  | -3.199644210 | 3.433655558  | -5.129534819 |
| H178  | -3.505532781 | 5.073033146  | -6.914979210 |
| H179  | -1.421953516 | 3.473883655  | -5.251241108 |
| H180  | -1.757202487 | 5.248800573  | -7.201875996 |
| H181  | -3.207541518 | 5.888469233  | -4.562787312 |
| H182  | -0.204067420 | 5.680437607  | -5.140321410 |
| H183  | -1.681345698 | 5.746680290  | -2.641149187 |
| H184  | 0.039396232  | 3.613995795  | -2.636987272 |
| H185  | 1.020672449  | -1.426620270 | -4.515517007 |
| H186  | 0.106197595  | -0.477974848 | -5.726243231 |
| H187  | 2.205344974  | -0.423377295 | -6.441755922 |
| H188  | 2.536266047  | 2.162111479  | -6.951541751 |
| H189  | 4.313416607  | -0.306190483 | -5.135550414 |
| H190  | 6.212310114  | 0.246493552  | -3.650810968 |
| H191  | 5.861725345  | 4.408252993  | -4.742218665 |
| H192  | -1.251314201 | 7.118660028  | -0.476218877 |
| H193  | -0.458322206 | 8.790763355  | 2.149957369  |

|      |               |              |               |
|------|---------------|--------------|---------------|
| H194 | -0.118583537  | 9.977122296  | 0.869489884   |
| H195 | -2.527183900  | 8.252079324  | 1.086430772   |
| H196 | -4.125115104  | 10.359615082 | -1.353945411  |
| H197 | 3.935146601   | 3.857290545  | -6.205989776  |
| H198 | 1.506563722   | 6.081542290  | -0.892194611  |
| H199 | -2.258134742  | 10.078431715 | -5.732486494  |
| H200 | -2.198943206  | 10.504614162 | -4.001931424  |
| H201 | 0.478375565   | 9.996201004  | -4.337630089  |
| H202 | 11.436132426  | 7.059714528  | 3.178920063   |
| H203 | -0.923538519  | -0.921604001 | 7.093675406   |
| H204 | 1.709375730   | 4.580048702  | 7.454307923   |
| H205 | -1.266951944  | -4.676732807 | 9.554480874   |
| H206 | 0.138650647   | -5.508480499 | 8.837990520   |
| H207 | -2.359128520  | -4.434544001 | 7.408785778   |
| H208 | -2.656281163  | -9.195350047 | 3.780520015   |
| H209 | -2.428570780  | -6.736563784 | 8.469380287   |
| H210 | -3.103445494  | -1.165924924 | 3.212487801   |
| H211 | -3.409472234  | 1.240161577  | 5.084401934   |
| H212 | -1.707301414  | -7.077625668 | 4.948160109   |
| H213 | -4.595420850  | -7.643827780 | 4.680967620   |
| H214 | -0.298597309  | -7.421240949 | 6.546315427   |
| H215 | -0.585317947  | 0.459142048  | 6.055815983   |
| H216 | -0.927885031  | -4.936499461 | 6.506083300   |
| H217 | -0.281306481  | -7.565501140 | 8.188104097   |
| H218 | -6.340338030  | -1.001314684 | 4.896461169   |
| H219 | -3.254641896  | 0.459127132  | 2.524859201   |
| H220 | 1.689037214   | -4.337325116 | 7.972204509   |
| H221 | -1.869339886  | 0.983766587  | 4.272714620   |
| H222 | -4.132575769  | 1.394820685  | -3.454907828  |
| H223 | -2.851483060  | 0.885043514  | -1.075975821  |
| H224 | -8.262033048  | 2.922953278  | -1.619795286  |
| H225 | -7.195195144  | 0.825720309  | 0.222957358   |
| H226 | -7.302051400  | -0.025925576 | -4.019669934  |
| H227 | -9.204133903  | -0.543597878 | -8.903452449  |
| H228 | -7.736614405  | 2.100713738  | -6.386824351  |
| H229 | -9.555531563  | 0.199927734  | -5.464500825  |
| H230 | -6.951256544  | -0.856975136 | -6.722481818  |
| H231 | -11.455976776 | -3.938115378 | -7.732202013  |
| H232 | -3.647210943  | -0.944193989 | -4.145108867  |
| H233 | -5.115857056  | -1.524070198 | -3.359497690  |
| H234 | -10.664891747 | -2.489001689 | -9.684961830  |
| H235 | -8.812716199  | -1.312376105 | -4.938102327  |
| H236 | -6.202048385  | 0.187636823  | -1.779593347  |
| H237 | -6.955850918  | 3.196070412  | -0.463175802  |
| H238 | -10.132959633 | -1.043099839 | -0.427584585  |
| H239 | -2.216293779  | -3.144299240 | 0.056452022   |
| H240 | -10.114982360 | -0.133034471 | 1.092367296   |
| H241 | 9.823674179   | 1.331397821  | -5.021166853  |
| H242 | 8.249621083   | 0.917885457  | -4.877345011  |
| H243 | 1.357984105   | -3.888398478 | -5.056000168  |
| H244 | -1.132254103  | -2.424862866 | -5.436653544  |
| H245 | 1.158845229   | -3.864260114 | -7.730489226  |
| H246 | -4.057043524  | -3.742114927 | -2.258872611  |
| H247 | -5.769344296  | -4.487717449 | -1.237468402  |
| H248 | -5.022588927  | -4.314399792 | -3.394805442  |
| H249 | -5.218025055  | -4.188862915 | 1.022052723   |
| H250 | -6.964711494  | -4.203160113 | 1.359406621   |
| H251 | -1.054577561  | -7.607128355 | -9.909200242  |
| H252 | -2.549813340  | -7.913382444 | -10.838010610 |
| H253 | -1.243825025  | -7.090448404 | -7.617840093  |
| H254 | -2.785534518  | -6.710941614 | -6.890880114  |
| H255 | -3.167444502  | -9.516977278 | -5.017000538  |

|      |              |              |               |
|------|--------------|--------------|---------------|
| H256 | -2.356121447 | -7.109277612 | -1.176352851  |
| H257 | -7.799580077 | -4.637243225 | -6.668450361  |
| H258 | -3.568016188 | -2.522063506 | -8.219832969  |
| H259 | -4.712454955 | -6.355283748 | -4.937578711  |
| H260 | 1.132306612  | -5.473106892 | -2.884456093  |
| H261 | 2.272668240  | -6.060315261 | -4.965797989  |
| H262 | -1.329260533 | -5.015081115 | -2.506317495  |
| H263 | -8.170853238 | -1.216649368 | 1.726714752   |
| H264 | 3.165565248  | -8.387282844 | -6.999125621  |
| H265 | -5.843798248 | -2.392829976 | 2.690293969   |
| H266 | 0.808308357  | -7.209629410 | -2.886633396  |
| H267 | -3.691975046 | -3.497404340 | -5.958793290  |
| H268 | 2.731147258  | -7.175603483 | -8.224558715  |
| H269 | -2.427308624 | -9.401339491 | -3.461663398  |
| H270 | -4.826653914 | -7.974510139 | -5.528712799  |
| H271 | -4.742838029 | -1.434771755 | 5.131509522   |
| H272 | -5.416077815 | 0.771368280  | 3.739074187   |
| H273 | -7.642485867 | -3.754141883 | -8.977952986  |
| H274 | -5.393980432 | -2.051107099 | -0.157994036  |
| H275 | -0.555510278 | -6.987139813 | -4.962455540  |
| H276 | -1.450944761 | -8.060821032 | -2.349836171  |
| H277 | -0.455561178 | -5.844779898 | -1.232660808  |
| H278 | -3.567393359 | -5.998846058 | -2.993565952  |
| H279 | 0.244384373  | -2.116595392 | -9.831569047  |
| H280 | -1.211610100 | -4.992672288 | -9.021416176  |
| H281 | -1.272052476 | -6.031571198 | -11.761846516 |
| H282 | 1.574044642  | -3.297556033 | -9.880220917  |
| H283 | -3.201633927 | -3.767148376 | -10.165084823 |
| H284 | 5.318080505  | -6.768027664 | 6.273040487   |
| H285 | 5.413781039  | -5.226558879 | 7.147253251   |
| H286 | 8.498846384  | -1.927566695 | 5.955267836   |
| H287 | 5.996712178  | -6.976101267 | 8.651954925   |
| H288 | 4.479530047  | -6.529781097 | 9.083760350   |
| H289 | 5.347659006  | -2.893274649 | -4.730084351  |
| H290 | 5.097929735  | -2.968011120 | -7.811375671  |
| H291 | 4.566714352  | -6.835639584 | -5.960744246  |
| H292 | 3.831872305  | -2.687896204 | -5.656865505  |
| H293 | 6.236694382  | -4.127670497 | -7.980622244  |
| H294 | 5.159506424  | -7.079418644 | -0.314136294  |
| H295 | 5.802808047  | -5.028338578 | -5.847852841  |
| H296 | 5.482693466  | 7.453916957  | 3.153987353   |
| H297 | 7.532989780  | 6.032770405  | 4.934278757   |
| H298 | 3.788130258  | -6.717450266 | 1.534369608   |
| H299 | 4.773621133  | 2.807657877  | -2.119865857  |
| H300 | 0.935038068  | -8.499485549 | 2.554927483   |
| H301 | -0.747087000 | -2.847566364 | 4.268500365   |
| H302 | 0.478076798  | -7.265848133 | 1.385442020   |
| H303 | 4.290329411  | 5.695890701  | 1.467666174   |
| H304 | 2.412954232  | -5.881836769 | 2.694728180   |
| H305 | 4.367426104  | 4.444052331  | 2.703930403   |
| H306 | 5.191366879  | 6.109864051  | 4.278952800   |
| H307 | 6.840990835  | 4.701322826  | 2.859760335   |
| H308 | 6.802462957  | 6.006117415  | 1.657924473   |
| H309 | -4.744651418 | -5.389961744 | 4.074414832   |
| H310 | 6.386362811  | 8.796588219  | 5.146100464   |
| H311 | 5.741094258  | 8.676821487  | 8.173239301   |
| H312 | 0.571655596  | -3.558932153 | 2.275641379   |
| H313 | 6.982064520  | 10.789672079 | 6.593331363   |
| H314 | 5.474983106  | 10.708493735 | 7.231373303   |
| H315 | 5.549971406  | 2.996064733  | 1.247307138   |
| H316 | -0.373611004 | -5.164016671 | 0.675980208   |
| H317 | -2.955102467 | -3.901080851 | 4.728753097   |

|       |              |              |               |
|-------|--------------|--------------|---------------|
| H318  | 8.508384850  | 3.405053754  | 8.573226930   |
| H319  | 7.569748762  | 0.161418700  | 7.995523154   |
| H320  | 7.188151373  | 3.828216230  | 6.583499100   |
| H321  | 7.867241471  | 2.734861366  | 9.808832880   |
| H322  | 5.341075192  | -9.366244989 | 1.573791523   |
| H323  | 6.847856289  | 2.060714922  | 4.023547787   |
| H324  | 3.056548502  | 4.181467960  | 5.840735459   |
| H325  | 3.825945545  | -5.789463624 | 4.832808681   |
| H326  | 3.839560394  | 3.467887030  | 8.161838960   |
| H327  | 4.244244827  | -3.251771428 | 9.093711407   |
| H328  | 3.134319758  | -2.302082598 | 7.004523469   |
| H329  | 7.415498962  | 9.229570914  | 8.278921021   |
| H330  | 5.309095166  | 1.922700882  | -0.684926507  |
| H331  | 8.825836727  | 3.428814793  | 3.931301968   |
| H332  | 7.434372973  | 1.606465965  | 2.657575738   |
| H333  | 9.361478170  | 5.765151001  | 3.754216714   |
| H334  | 4.523827472  | 5.947668179  | -0.544896228  |
| H335  | 4.016513713  | 2.152182755  | 11.812985111  |
| H336  | 4.313935013  | 0.487450445  | 8.699214091   |
| H337  | 5.618810403  | 1.587118026  | 8.213362112   |
| H338  | 2.606507085  | 2.194424576  | 8.393747105   |
| H339  | 1.829543442  | -4.475278958 | 4.525675474   |
| H340  | -2.589392460 | -6.260695708 | 1.140405091   |
| H341  | -4.715469284 | -6.292775676 | 2.538466117   |
| H342  | 2.607056947  | 2.881546001  | 4.687247533   |
| H343  | 9.018080562  | 4.076894707  | 5.329502278   |
| H344  | 7.957007165  | 5.101231591  | 7.038153779   |
| H345  | 4.160419963  | 5.048185877  | -1.955039589  |
| H346  | 6.667393082  | -2.445525267 | 9.342598913   |
| H347  | 7.129971189  | 0.164382735  | 6.285792120   |
| H348  | 1.104941981  | -5.309127553 | 5.932001858   |
| H349  | 4.091123986  | -8.382190921 | -0.882826037  |
| H350  | 7.231851868  | 3.698347416  | -2.767217855  |
| H351  | 7.376169994  | 1.980210879  | -2.343462036  |
| H352  | 9.975937086  | -2.594776184 | 7.646144899   |
| H353  | 9.468855428  | -1.441139878 | 8.690453076   |
| H354  | 11.122212806 | 2.572576726  | 7.310354161   |
| H355  | 9.349225678  | 1.185639873  | 7.716362734   |
| H356  | 12.499278214 | 0.214670972  | 7.140392415   |
| H357  | 10.796946282 | 2.266872055  | 5.589225206   |
| H358  | 10.108593094 | 2.251212082  | -2.189225771  |
| H359  | -4.167288865 | -3.003197336 | -13.110109040 |
| H360  | 10.367370061 | 8.249139600  | 2.381208150   |
| H361  | 9.710118106  | 6.102650595  | 0.812023790   |
| H362  | -5.798064074 | -4.580394428 | -11.115442157 |
| H363  | -4.754613622 | -1.800262409 | -10.300663655 |
| H364  | -6.453379058 | -2.226302037 | -10.563917724 |
| H365  | 1.508218112  | 0.483643620  | 3.309234504   |
| H366  | -6.699108346 | -4.932427001 | -4.688338972  |
| H367  | 0.193166470  | 0.227630486  | 1.303392743   |
| H368  | -1.698521848 | -0.736640479 | 0.566562162   |
| M0369 | 4.296988257  | -0.203952776 | 4.677267937   |
| N370  | 2.457566594  | 1.753815377  | -0.093603143  |
| N371  | 2.373663253  | 0.636639248  | -0.144848770  |
| N372  | -6.238276374 | 2.671736226  | 7.121054911   |
| N373  | -8.576474040 | 3.229065853  | 4.270594700   |
| N374  | -8.487243916 | 5.872387603  | 3.253674303   |
| N375  | -5.852458226 | 6.682962187  | 3.815111505   |
| N376  | -4.337321487 | 4.849816883  | 2.213755863   |
| N377  | -5.223976799 | 5.722857154  | -0.341484653  |
| N378  | -4.564463803 | 8.543924752  | -0.409638248  |
| N379  | -1.922423708 | 8.961592682  | 0.660042764   |

|      |               |              |               |
|------|---------------|--------------|---------------|
| N380 | -0.236548524  | 7.064200880  | -0.423148418  |
| N381 | -0.895029303  | 6.063223264  | -3.211244875  |
| N382 | -1.682770804  | 8.533156481  | -4.380333835  |
| N383 | 6.190437112   | 10.162317473 | 6.749652426   |
| N384 | 6.791643086   | 7.899100822  | 5.433397200   |
| N385 | 5.222795538   | 3.899584186  | 0.892444747   |
| N386 | 4.327921727   | 5.039356802  | -0.953461458  |
| N387 | 4.978417881   | 2.810821464  | -1.124727483  |
| N388 | 9.352600080   | 6.727048984  | 3.350404968   |
| N389 | -5.479317465  | -1.279607631 | 4.420746403   |
| N390 | -1.211565280  | -0.298688436 | 6.333153348   |
| N391 | -5.925167431  | -1.802484329 | 1.850057223   |
| N392 | -8.382387072  | -1.222064961 | 0.732424394   |
| N393 | -7.860774231  | 1.296481701  | -0.405124337  |
| N394 | -5.883125167  | 0.930811457  | -2.400579771  |
| N395 | -3.324323211  | -2.358033981 | -1.625730345  |
| N396 | -2.332423534  | -1.013401544 | -0.185449542  |
| N397 | -6.837709281  | 0.200258951  | -4.896073014  |
| N398 | -10.347649193 | -2.555210561 | -6.507253142  |
| N399 | -10.436596609 | -2.309851797 | -8.710933165  |
| N400 | 9.047431061   | 1.292295028  | -4.356115828  |
| N401 | 5.791855147   | -3.514913470 | -7.290612255  |
| N402 | 3.904058755   | -6.473254277 | -6.641000417  |
| N403 | 1.422797625   | -6.521160130 | -5.331280978  |
| N404 | -3.023676413  | -6.880377286 | -3.124551925  |
| N405 | -2.856656721  | -8.929617106 | -4.249801952  |
| N406 | -4.271811905  | -7.273793469 | -5.043538848  |
| N407 | 0.386869178   | -3.846558126 | -5.405204697  |
| N408 | 0.362687240   | -3.409102844 | -8.187654814  |
| N409 | -1.195754034  | -4.891670171 | -10.037966376 |
| N410 | -2.243651965  | -6.888410934 | -7.736377213  |
| N411 | -3.742983225  | -4.233712131 | -10.888984533 |
| N412 | 5.020808192   | -6.993721259 | 8.348210128   |
| N413 | 3.088105058   | -5.797089171 | 5.547206587   |
| N414 | 1.738642773   | -6.630760139 | 2.956982050   |
| N415 | 3.582236837   | -7.556464516 | 0.976781413   |
| N416 | -0.890889714  | -7.595475829 | 7.368019687   |
| N417 | -2.700550685  | -7.077443056 | 5.202873594   |
| N418 | 9.153039320   | -2.057557029 | 7.934721881   |
| N419 | 5.030020998   | -1.337949404 | 6.676195914   |
| N420 | 4.714205097   | -2.641341473 | 8.430707512   |
| N421 | 9.982817898   | 0.871294480  | 6.981667047   |
| N422 | 0.034780440   | -1.140611869 | -2.267928563  |
| N423 | 0.871549434   | -1.158786114 | -1.516255009  |
| O424 | -6.362789652  | 3.727443738  | 4.447110114   |
| O425 | -7.610310809  | 5.044164049  | 1.320366327   |
| O426 | -6.047630685  | 8.304576223  | 2.213547569   |
| O427 | -2.798799245  | 6.513581652  | 2.007486950   |
| O428 | -3.253760946  | 4.971541259  | -1.192957611  |
| O429 | -4.067310354  | 8.187791042  | -2.611196715  |
| O430 | -1.804159511  | 10.905274292 | -0.553917983  |
| O431 | 1.611205699   | 7.992368067  | 0.586193664   |
| O432 | 1.344840949   | 6.486059579  | -3.326584128  |
| O433 | -0.370988312  | 7.961718068  | -6.143087176  |
| O434 | -0.060119418  | 11.468523886 | -5.646700968  |
| O435 | 7.580337357   | 6.833223586  | 7.329478583   |
| O436 | 8.172454802   | 8.682647240  | 3.087852687   |
| O437 | 11.732422335  | 6.337522298  | 0.693756785   |
| O438 | -5.606930013  | 0.372996917  | 1.191988231   |
| O439 | -3.146179325  | -1.462314740 | 6.057475668   |
| O440 | -7.604732504  | -1.740646571 | -1.348115451  |
| O441 | -6.517550516  | -4.564265231 | -0.586242797  |

|  |                   |              |                                   |               |             |              |
|--|-------------------|--------------|-----------------------------------|---------------|-------------|--------------|
|  | O442              | -9.990337332 | 1.365760705                       | -1.262321737  |             |              |
|  | O443              | -6.010911938 | 3.134698594                       | -2.979664630  |             |              |
|  | O444              | -4.920900845 | 0.960850674                       | -5.869196033  |             |              |
|  | O445              | -7.596578779 | 1.194432920                       | -8.209266600  |             |              |
|  | O446              | 10.193879663 | 4.213140450                       | -2.752668375  |             |              |
|  | O447              | 2.950710266  | 1.368155393                       | -6.567150099  |             |              |
|  | O448              | 3.104321952  | -4.624005897                      | -7.705784886  |             |              |
|  | O449              | 0.484847815  | -7.653986888                      | -7.097892587  |             |              |
|  | O450              | -1.683230966 | -4.818428814                      | -5.375498379  |             |              |
|  | O451              | -1.259258263 | -1.815390639                      | -7.910939815  |             |              |
|  | O452              | 1.876621967  | -1.345721280                      | -6.429776009  |             |              |
|  | O453              | -0.107890927 | -3.916516641                      | -11.800305205 |             |              |
|  | O454              | -3.843130071 | -6.024386170                      | -12.298847121 |             |              |
|  | O455              | -4.162762631 | -7.089998634                      | -8.959572288  |             |              |
|  | O456              | -6.204727250 | -3.076512711                      | -13.233525851 |             |              |
|  | O457              | -5.781860751 | -4.663355613                      | -4.889429576  |             |              |
|  | O458              | 2.634006870  | -5.703833818                      | 7.798448792   |             |              |
|  | O459              | 0.246892325  | -7.272877696                      | 4.572398821   |             |              |
|  | O460              | 2.051779769  | -9.098460149                      | 0.270083677   |             |              |
|  | O461              | 6.498380854  | -9.422723241                      | -0.105595374  |             |              |
|  | O462              | -4.266171900 | -6.711784562                      | 6.822416587   |             |              |
|  | O463              | -0.548903076 | -2.319714154                      | 8.612545228   |             |              |
|  | O464              | 1.322840671  | -3.402880056                      | 8.067095361   |             |              |
|  | O465              | -3.614645799 | -8.558965397                      | 2.099892755   |             |              |
|  | O466              | 10.563916829 | -0.619586360                      | 5.380248624   |             |              |
|  | O467              | 13.296230685 | 1.492960812                       | 5.763649751   |             |              |
|  | O468              | 0.338312257  | 2.372856736                       | 5.909947815   |             |              |
|  | O469              | 0.923133744  | 4.031559413                       | 7.269922092   |             |              |
|  | O470              | 5.956083901  | 2.320773052                       | 10.613411077  |             |              |
|  | O471              | 3.765335245  | 1.857891326                       | 10.911724658  |             |              |
|  | O472              | 5.638359103  | 1.518406499                       | 5.309442225   |             |              |
|  | O473              | 5.551666773  | 3.592531011                       | 6.189573164   |             |              |
|  | O474              | 3.246199357  | 0.846637926                       | 6.164809503   |             |              |
|  | O475              | 9.400920313  | 4.076525724                       | 4.412010999   |             |              |
|  | O476              | 7.462222059  | 2.344542257                       | 3.299494393   |             |              |
|  | O477              | -4.599239571 | -4.558097501                      | -2.542681198  |             |              |
|  | O478              | 8.741263033  | 2.956050415                       | 9.425504904   |             |              |
|  | O479              | 8.094622897  | 4.131099209                       | 6.886276397   |             |              |
|  | S480              | 3.582306447  | -4.354358290                      | -3.902788540  |             |              |
|  | S481              | 2.070739908  | -3.647510802                      | -0.390751263  |             |              |
|  | S482              | 2.520574904  | -1.783944766                      | 4.485078609   |             |              |
|  | S483              | 3.771042296  | -0.971074146                      | -2.089765185  |             |              |
|  | S484              | 0.657925084  | -1.039559894                      | 1.512373201   |             |              |
|  | S485              | 4.300561357  | -4.644253627                      | 2.673178918   |             |              |
|  | S486              | 3.730255157  | 1.325362863                       | 2.916391032   |             |              |
|  | S487              | 5.689175728  | -3.576024438                      | -0.629611589  |             |              |
|  | S488              | 6.074124379  | -1.430753309                      | 3.664746104   |             |              |
|  | S489              | 6.375123034  | 0.316055229                       | 0.397430814   |             |              |
|  | <b>5, 47(5/2)</b> |              | <b>bm12b2n2x6x2n2nas475.car_2</b> |               |             |              |
|  | Fe1               | 3.20         | C1                                | -7.419120893  | 3.323276286 | 4.977002715  |
|  | Fe2               | 0.10         | C2                                | -7.504317635  | 2.968475854 | 6.464221972  |
|  | Fe3               | 2.74         | C3                                | -8.608454403  | 3.452539079 | 2.830855911  |
|  | Fe4               | -2.67        | C4                                | -8.192489939  | 4.857785486 | 2.403472935  |
|  | Fe5               | 2.30         | C5                                | -8.089926240  | 7.235042417 | 2.952853151  |
|  | Fe6               | 1.31         | C6                                | -6.572321506  | 7.448642830 | 2.950377387  |
|  | Fe7               | -2.31        | C7                                | -4.404559381  | 6.712359220 | 3.818517685  |
|  |                   |              | C8                                | -3.772883243  | 6.023023558 | 2.604993012  |
|  |                   |              | C9                                | -3.870193025  | 4.183957816 | 1.005427723  |
|  |                   |              | C10                               | -4.086512331  | 5.006735213 | -0.274653819 |
|  |                   |              | C11                               | -5.478367486  | 6.555171273 | -1.516661805 |
|  |                   |              | C12                               | -4.633420297  | 7.836082767 | -1.561179088 |

|     |               |              |              |
|-----|---------------|--------------|--------------|
| C13 | -3.966385784  | 9.876187382  | -0.381692876 |
| C14 | -2.458682554  | 9.952731422  | -0.110366256 |
| C15 | -0.532344558  | 8.974662623  | 1.064533582  |
| C16 | 0.383792713   | 7.961183546  | 0.369754137  |
| C17 | 0.434618893   | 5.985127574  | -1.143130298 |
| C18 | 0.329899313   | 6.206066956  | -2.662912119 |
| C19 | -0.069248091  | 4.593971844  | -0.689053044 |
| C20 | 0.432813074   | 3.492088186  | -1.626873587 |
| C21 | 0.314134195   | 4.332256840  | 0.772503536  |
| C22 | -1.088044624  | 6.167187426  | -4.664508948 |
| C23 | -1.024001177  | 7.631486668  | -5.132082465 |
| C24 | -2.379399796  | 5.442734013  | -5.116259388 |
| C25 | -2.623611163  | 5.633730054  | -6.617529568 |
| C26 | -2.315147188  | 3.948041863  | -4.771348472 |
| C27 | -1.713706522  | 9.927293520  | -4.785813021 |
| C28 | -0.320374127  | 10.501371007 | -4.953141132 |
| C29 | 6.601479954   | 9.011215329  | 7.573188972  |
| C30 | 7.050121239   | 7.799893068  | 6.754624043  |
| C31 | 7.163278813   | 6.921797504  | 4.417083410  |
| C32 | 8.282454891   | 7.527561724  | 3.547825814  |
| C33 | 5.928041396   | 6.540414870  | 3.583439961  |
| C34 | 6.224613799   | 5.530477422  | 2.472344677  |
| C35 | 4.936092406   | 4.925125664  | 1.910810473  |
| C36 | 4.852591347   | 3.922784297  | -0.384183113 |
| C37 | 10.512551465  | 7.167675277  | 2.600379388  |
| C38 | 10.658303836  | 6.477397367  | 1.261170034  |
| C39 | -5.040741515  | -0.240694762 | 3.505932443  |
| C40 | -5.556929353  | -0.514310390 | 2.082468434  |
| C41 | -3.498780919  | -0.148080040 | 3.421561338  |
| C42 | -2.777797327  | 0.469712211  | 4.638616978  |
| C43 | -2.392879859  | -0.517794686 | 5.738573709  |
| C44 | -6.170252978  | -2.338515173 | 0.521801143  |
| C45 | -7.408409420  | -1.727767970 | -0.137034697 |
| C46 | -6.227450871  | -3.889273923 | 0.609635680  |
| C47 | -9.482883418  | -0.463881807 | 0.202160050  |
| C48 | -9.123742274  | 0.811237037  | -0.573997308 |
| C49 | -7.397635961  | 2.459633608  | -1.143713862 |
| C50 | -6.359600028  | 2.201880437  | -2.238529186 |
| C51 | -4.934081228  | 0.616857519  | -3.446382514 |
| C52 | -5.571223023  | 0.647181856  | -4.851800971 |
| C53 | -4.325631810  | -0.783595367 | -3.273493681 |
| C54 | -3.548189772  | -1.046105922 | -2.020150150 |
| C55 | -2.932210558  | -0.192321178 | -1.129791545 |
| C56 | -2.562377350  | -2.293390546 | -0.533249177 |
| C57 | -7.522313737  | -0.108673286 | -6.153002200 |
| C58 | -7.604533676  | 1.162536887  | -6.993317940 |
| C59 | -8.934444217  | -0.639557823 | -5.814861812 |
| C60 | -9.620061430  | -1.434943600 | -6.886477869 |
| C61 | -9.661035682  | -1.266062481 | -8.256635200 |
| C62 | -10.842752657 | -3.044216773 | -7.661980231 |
| C63 | 8.747924556   | 2.619440057  | -3.896597712 |
| C64 | 9.786089479   | 3.047339794  | -2.874615388 |
| C65 | 7.373663897   | 2.676336672  | -3.191027744 |
| C66 | 6.218238059   | 2.354128506  | -4.109071971 |
| C67 | 5.550693464   | 3.360726489  | -4.830849157 |
| C68 | 5.764187775   | 1.030893826  | -4.252950466 |
| C69 | 4.464229610   | 3.060591748  | -5.660973365 |
| C70 | 4.690716400   | 0.714350430  | -5.085220409 |
| C71 | 4.038305656   | 1.731511518  | -5.785355065 |
| C72 | 5.079390414   | -4.340241250 | -6.300834183 |
| C73 | 3.943488308   | -5.146613978 | -6.945743330 |
| C74 | 4.517013491   | -3.429363741 | -5.199246362 |

|      |              |              |               |
|------|--------------|--------------|---------------|
| C75  | 2.861890130  | -7.342816180 | -7.150047231  |
| C76  | 1.479329558  | -7.166368821 | -6.518844597  |
| C77  | 0.163723548  | -6.206034968 | -4.667405417  |
| C78  | -0.454728865 | -4.888837320 | -5.181323933  |
| C79  | 0.377118044  | -6.217001744 | -3.142062180  |
| C80  | -0.845953887 | -5.950859893 | -2.255744588  |
| C81  | -1.911440742 | -7.060647610 | -2.178296187  |
| C82  | -3.386637593 | -7.685623451 | -4.097574169  |
| C83  | -0.147256266 | -2.586837519 | -5.919088834  |
| C84  | -0.409548702 | -2.584264469 | -7.437230139  |
| C85  | 0.732867165  | -1.375934229 | -5.586805671  |
| C86  | 0.518903467  | -3.167718806 | -9.623041101  |
| C87  | -0.288593559 | -4.033128603 | -10.586415166 |
| C88  | -1.902918402 | -5.867421928 | -10.872724374 |
| C89  | -3.262519434 | -5.383576941 | -11.419367920 |
| C90  | -2.061471079 | -7.221640121 | -10.144140012 |
| C91  | -2.925273213 | -7.094311986 | -8.893410544  |
| C92  | -5.089872814 | -3.756383768 | -11.205127980 |
| C93  | -5.164733722 | -3.250061252 | -12.640387105 |
| C94  | -5.495443191 | -2.625370030 | -10.220898320 |
| C95  | -5.595929915 | -3.102857208 | -8.790070899  |
| C96  | -6.784039188 | -3.678973579 | -8.315002659  |
| C97  | -4.502473352 | -3.022850246 | -7.911637460  |
| C98  | -6.879736593 | -4.180090676 | -7.014417491  |
| C99  | -4.571380026 | -3.539510691 | -6.614037579  |
| C100 | -5.762828498 | -4.119155900 | -6.179240595  |
| C101 | 4.896098694  | -6.196144048 | 7.118263005   |
| C102 | 3.433075831  | -5.887230991 | 6.845982427   |
| C103 | 1.759178980  | -5.437750180 | 5.069514616   |
| C104 | 1.170859071  | -6.535150655 | 4.176365916   |
| C105 | 1.325005971  | -7.643995854 | 1.999723060   |
| C106 | 2.373694408  | -8.162289350 | 1.020822369   |
| C107 | 4.591388863  | -7.958817986 | 0.009057663   |
| C108 | 5.556078599  | -9.001719329 | 0.539186076   |
| C109 | -1.943148532 | -6.577513895 | 7.494500813   |
| C110 | -3.074297103 | -6.802667697 | 6.481380546   |
| C111 | -1.484881573 | -5.102052945 | 7.442894286   |
| C112 | -0.625247519 | -4.738517929 | 8.667100766   |
| C113 | 0.036064864  | -3.392391818 | 8.473519048   |
| C114 | -3.689180975 | -7.278429603 | 4.157471230   |
| C115 | -3.273591325 | -8.435651563 | 3.269428848   |
| C116 | -4.099194240 | -5.991326645 | 3.397266647   |
| C117 | -2.893433346 | -5.190194684 | 2.987473716   |
| C118 | -2.166735396 | -5.514984846 | 1.830474023   |
| C119 | -2.387718458 | -4.200356917 | 3.847406190   |
| C120 | -0.932975536 | -4.907335018 | 1.579542573   |
| C121 | -1.152014428 | -3.597132383 | 3.596900331   |
| C122 | -0.409751378 | -3.973198542 | 2.475498920   |
| C123 | 8.688271659  | -1.245742572 | 6.799839759   |
| C124 | 9.794917458  | -0.300972666 | 6.307089937   |
| C125 | 7.388205360  | -0.495086182 | 7.125232279   |
| C126 | 6.201483896  | -1.352165527 | 7.443045638   |
| C127 | 6.016094779  | -2.167960826 | 8.541956641   |
| C128 | 4.159692912  | -2.120940897 | 7.333482483   |
| C129 | 11.027706616 | 1.778477964  | 6.544079375   |
| C130 | 12.370000761 | 1.088181759  | 6.448540877   |
| C131 | 1.223805677  | 3.125836752  | 6.272488093   |
| C132 | 2.631907515  | 3.172907280  | 5.750784415   |
| C133 | 3.605855037  | 2.150867506  | 6.464250214   |
| C134 | 3.615392344  | 2.414627065  | 7.996450539   |
| C135 | 4.653034433  | 1.542011991  | 8.722233288   |
| C136 | 4.891203189  | 1.948555703  | 10.147978488  |



|       |              |              |              |
|-------|--------------|--------------|--------------|
| C137  | 5.040761246  | 2.481912703  | 5.940719629  |
| C138  | 3.741269755  | -1.577755290 | 1.271173514  |
| Fe139 | 4.156154403  | -2.441231464 | 3.083147800  |
| Fe140 | 2.211617938  | -1.199863514 | -0.281430957 |
| Fe141 | 5.015800258  | -1.394994888 | -0.219382981 |
| Fe142 | 3.961894056  | -3.504245384 | 0.790715178  |
| Fe143 | 3.765527756  | -3.299185205 | -1.837310616 |
| Fe144 | 5.013406951  | -0.253124821 | 2.045767439  |
| Fe145 | 2.520912904  | -0.515792447 | 2.763018302  |
| H146  | -5.565075984 | 3.413401900  | 6.910881427  |
| H147  | -5.838510099 | 1.813235883  | 6.737941634  |
| H148  | -9.386951235 | 2.792092420  | 4.710069816  |
| H149  | -8.197765147 | 2.124729056  | 6.602955026  |
| H150  | -7.974148491 | 3.836444734  | 6.959936466  |
| H151  | -7.938408079 | 2.755467021  | 2.307806717  |
| H152  | -8.976414720 | 5.661706836  | 4.123274601  |
| H153  | -9.632141636 | 3.269956939  | 2.477158479  |
| H154  | -8.538418286 | 7.900368274  | 3.702742855  |
| H155  | -6.322495184 | 5.902622802  | 4.281308463  |
| H156  | -8.455084063 | 7.538742374  | 1.963248001  |
| H157  | -2.792327258 | 3.985802610  | 1.070363921  |
| H158  | -5.094924933 | 4.441998659  | 2.759637521  |
| H159  | -4.049429487 | 6.230851549  | 4.740283326  |
| H160  | -5.258075252 | 5.984398006  | -2.427283802 |
| H161  | -5.960315339 | 5.619318534  | 0.362173693  |
| H162  | -4.057320266 | 7.752180521  | 3.814207346  |
| H163  | -4.393134537 | 3.219745385  | 0.923161220  |
| H164  | -5.105704514 | 8.252745355  | 0.411972851  |
| H165  | -6.541124030 | 6.835264985  | -1.523335280 |
| H166  | -0.083864201 | 5.116106641  | 1.433996399  |
| H167  | -0.098521397 | 3.367711751  | 1.106739456  |
| H168  | 1.405799968  | 4.284062559  | 0.901024020  |
| H169  | -1.168706775 | 4.610408553  | -0.748109737 |
| H170  | -4.468460500 | 10.469816072 | 0.396500703  |
| H171  | -2.248957098 | 3.769524073  | -3.689481659 |
| H172  | -2.309601821 | 8.245187830  | -3.616677005 |
| H173  | -2.769544560 | 6.690125605  | -6.886473624 |
| H174  | 0.098953250  | 2.510361359  | -1.262693194 |
| H175  | 1.529995949  | 3.470887757  | -1.670431425 |
| H176  | 8.746848574  | 3.380080956  | -4.702176123 |
| H177  | -3.220381560 | 3.439099572  | -5.132452965 |
| H178  | -3.522696999 | 5.077349093  | -6.919767340 |
| H179  | -1.442576679 | 3.477870260  | -5.253794610 |
| H180  | -1.773623041 | 5.250994105  | -7.205025338 |
| H181  | -3.225869908 | 5.894463681  | -4.567674096 |
| H182  | -0.223184793 | 5.684659173  | -5.146402080 |
| H183  | -1.694504719 | 5.748875644  | -2.642478217 |
| H184  | 0.049241345  | 3.616454266  | -2.648999059 |
| H185  | 1.025550283  | -1.426233341 | -4.526164036 |
| H186  | 0.110763107  | -0.479096588 | -5.737265862 |
| H187  | 2.213036349  | -0.424524732 | -6.448591601 |
| H188  | 2.549033394  | 2.163587901  | -6.955262749 |
| H189  | 4.331225256  | -0.312032519 | -5.155597334 |
| H190  | 6.227733886  | 0.235458039  | -3.665644195 |
| H191  | 5.872324001  | 4.401867467  | -4.733725773 |
| H192  | -1.258732125 | 7.112183869  | -0.477669023 |
| H193  | -0.461667464 | 8.784648321  | 2.145735881  |
| H194  | -0.120457734 | 9.973469954  | 0.868777349  |
| H195  | -2.532773145 | 8.253869144  | 1.084237197  |
| H196  | -4.129879836 | 10.370933765 | -1.347705382 |
| H197  | 3.945814994  | 3.857802845  | -6.200317461 |
| H198  | 1.502118995  | 6.087768733  | -0.907780744 |

|      |               |              |               |
|------|---------------|--------------|---------------|
| H199 | -2.275428089  | 10.086754524 | -5.721367576  |
| H200 | -2.207007874  | 10.509080302 | -3.990790165  |
| H201 | 0.470569700   | 10.001297135 | -4.347011294  |
| H202 | 11.439841355  | 7.041384146  | 3.179266593   |
| H203 | -0.917564832  | -0.923049385 | 7.101369960   |
| H204 | 1.701229540   | 4.564347599  | 7.466105088   |
| H205 | -1.269562290  | -4.681811430 | 9.556812595   |
| H206 | 0.135572686   | -5.513143087 | 8.839886349   |
| H207 | -2.359881734  | -4.434240679 | 7.410316945   |
| H208 | -2.653733667  | -9.206244168 | 3.785351863   |
| H209 | -2.431759681  | -6.736423260 | 8.467552295   |
| H210 | -3.099712642  | -1.156173080 | 3.222966297   |
| H211 | -3.414374146  | 1.241502558  | 5.105947961   |
| H212 | -1.705387750  | -7.089379897 | 4.951136396   |
| H213 | -4.594385044  | -7.650988777 | 4.677110715   |
| H214 | -0.298954966  | -7.422714154 | 6.549157114   |
| H215 | -0.582465214  | 0.459269697  | 6.064656231   |
| H216 | -0.928155780  | -4.934654020 | 6.507810057   |
| H217 | -0.285658759  | -7.567059932 | 8.190728647   |
| H218 | -6.338826198  | -1.023228034 | 4.906639439   |
| H219 | -3.261561364  | 0.470710444  | 2.543775861   |
| H220 | 1.688636994   | -4.340294588 | 7.980281889   |
| H221 | -1.875354467  | 0.992893232  | 4.291226625   |
| H222 | -4.152134154  | 1.389257751  | -3.446907370  |
| H223 | -2.870957982  | 0.889282237  | -1.077553768  |
| H224 | -8.266679114  | 2.925810872  | -1.626956501  |
| H225 | -7.200466825  | 0.837714252  | 0.226353145   |
| H226 | -7.312696893  | -0.053597282 | -4.023283235  |
| H227 | -9.200799488  | -0.537008307 | -8.914890260  |
| H228 | -7.726744760  | 2.095845537  | -6.391359714  |
| H229 | -9.565094333  | 0.202384490  | -5.477849069  |
| H230 | -6.959142407  | -0.865116984 | -6.723639598  |
| H231 | -11.471451492 | -3.925318286 | -7.761561694  |
| H232 | -3.671658998  | -0.954874194 | -4.144488484  |
| H233 | -5.133332409  | -1.530449922 | -3.340844290  |
| H234 | -10.664836290 | -2.475947413 | -9.707326062  |
| H235 | -8.833108842  | -1.314022464 | -4.949795612  |
| H236 | -6.271583826  | 0.170653176  | -1.818317121  |
| H237 | -6.970729525  | 3.208265954  | -0.460825694  |
| H238 | -10.103936652 | -1.068075599 | -0.473060170  |
| H239 | -2.185000031  | -3.133775482 | 0.043646288   |
| H240 | -10.107308179 | -0.174076591 | 1.058588476   |
| H241 | 9.834155326   | 1.290265501  | -5.012786932  |
| H242 | 8.256323058   | 0.890282015  | -4.873357621  |
| H243 | 1.362679664   | -3.888888948 | -5.062594867  |
| H244 | -1.126574094  | -2.425690874 | -5.445625658  |
| H245 | 1.163326486   | -3.867305619 | -7.738388963  |
| H246 | -4.060163986  | -3.738968007 | -2.256517330  |
| H247 | -5.792817556  | -4.473333575 | -1.247313969  |
| H248 | -5.029824186  | -4.308390476 | -3.394143261  |
| H249 | -5.251010472  | -4.216625774 | 1.013926252   |
| H250 | -7.003650479  | -4.169947919 | 1.340168426   |
| H251 | -1.058144710  | -7.606795352 | -9.910754493  |
| H252 | -2.555010871  | -7.915546808 | -10.836366252 |
| H253 | -1.243767914  | -7.088773700 | -7.618794333  |
| H254 | -2.784202005  | -6.708623648 | -6.890010471  |
| H255 | -3.149017409  | -9.499162063 | -5.016276855  |
| H256 | -2.349145037  | -7.083888258 | -1.169695479  |
| H257 | -7.816585254  | -4.617037931 | -6.658681633  |
| H258 | -3.570218747  | -2.542626242 | -8.224196918  |
| H259 | -4.718532086  | -6.352311190 | -4.928498342  |
| H260 | 1.136749518   | -5.460403831 | -2.890270224  |

|      |              |              |               |
|------|--------------|--------------|---------------|
| H261 | 2.277449636  | -6.062268794 | -4.965624294  |
| H262 | -1.327401794 | -4.997602521 | -2.524516721  |
| H263 | -8.181140804 | -1.272012634 | 1.700635765   |
| H264 | 3.166270872  | -8.388699237 | -7.003364237  |
| H265 | -5.816575489 | -2.400530197 | 2.687897104   |
| H266 | 0.811756000  | -7.196253738 | -2.879108438  |
| H267 | -3.695414581 | -3.516714893 | -5.962461112  |
| H268 | 2.732105948  | -7.176481707 | -8.227868890  |
| H269 | -2.409024861 | -9.382351520 | -3.460875925  |
| H270 | -4.820418611 | -7.970064212 | -5.522165389  |
| H271 | -4.738551774 | -1.442253228 | 5.144707729   |
| H272 | -5.424173141 | 0.764437744  | 3.765013867   |
| H273 | -7.658241187 | -3.735685019 | -8.968509600  |
| H274 | -5.341658797 | -2.060771091 | -0.146611665  |
| H275 | -0.551160663 | -6.986931576 | -4.959100467  |
| H276 | -1.446603774 | -8.041791292 | -2.341267236  |
| H277 | -0.453047395 | -5.810357017 | -1.239892818  |
| H278 | -3.573862286 | -5.990306556 | -2.983855650  |
| H279 | 0.250400138  | -2.122915547 | -9.841636133  |
| H280 | -1.215298502 | -4.992606288 | -9.025326144  |
| H281 | -1.280994467 | -6.033337543 | -11.764535598 |
| H282 | 1.575348274  | -3.308714999 | -9.890849205  |
| H283 | -3.210965128 | -3.769774780 | -10.167532290 |
| H284 | 5.320744773  | -6.761666540 | 6.276236434   |
| H285 | 5.412671206  | -5.214564979 | 7.140173741   |
| H286 | 8.499684968  | -1.934533501 | 5.963582622   |
| H287 | 6.003294821  | -6.946437188 | 8.659473207   |
| H288 | 4.480036134  | -6.513194148 | 9.084637539   |
| H289 | 5.352486226  | -2.899042696 | -4.725088458  |
| H290 | 5.102778186  | -2.967237871 | -7.807734284  |
| H291 | 4.568140949  | -6.838206578 | -5.963075221  |
| H292 | 3.833806102  | -2.695402180 | -5.650054070  |
| H293 | 6.242833069  | -4.126229824 | -7.975860896  |
| H294 | 5.168323660  | -7.074839342 | -0.305712653  |
| H295 | 5.805487760  | -5.033214750 | -5.847816754  |
| H296 | 5.484251028  | 7.457011327  | 3.159387595   |
| H297 | 7.534529078  | 6.029822603  | 4.935268552   |
| H298 | 3.788142827  | -6.712054788 | 1.529700964   |
| H299 | 4.768406636  | 2.816530355  | -2.109084694  |
| H300 | 0.943542862  | -8.509141158 | 2.557906068   |
| H301 | -0.759646221 | -2.838534178 | 4.277396763   |
| H302 | 0.483873895  | -7.276891323 | 1.387442421   |
| H303 | 4.280365077  | 5.695407713  | 1.482308551   |
| H304 | 2.411145204  | -5.886360815 | 2.696052006   |
| H305 | 4.365198559  | 4.444506111  | 2.720681005   |
| H306 | 5.192998095  | 6.113438342  | 4.284667683   |
| H307 | 6.838663242  | 4.703094098  | 2.859395618   |
| H308 | 6.792742537  | 6.007256141  | 1.657032924   |
| H309 | -4.741047083 | -5.399980342 | 4.065875715   |
| H310 | 6.393521926  | 8.795442144  | 5.149883150   |
| H311 | 5.744931013  | 8.672068161  | 8.175693403   |
| H312 | 0.569783303  | -3.536211261 | 2.285495528   |
| H313 | 6.986967631  | 10.787360171 | 6.601330893   |
| H314 | 5.476728851  | 10.701780361 | 7.232370462   |
| H315 | 5.526512528  | 2.989180123  | 1.264031124   |
| H316 | -0.354936180 | -5.156985894 | 0.688768296   |
| H317 | -2.959901657 | -3.908549972 | 4.731040772   |
| H318 | 8.509529996  | 3.400311253  | 8.570144191   |
| H319 | 7.569346808  | 0.169222251  | 7.988874963   |
| H320 | 7.184771855  | 3.828312364  | 6.580591255   |
| H321 | 7.871534363  | 2.731018821  | 9.808296073   |
| H322 | 5.347749533  | -9.362321768 | 1.575752755   |

|       |              |              |               |
|-------|--------------|--------------|---------------|
| H323  | 6.845177171  | 2.063055028  | 4.024457687   |
| H324  | 3.052988207  | 4.185521084  | 5.846459385   |
| H325  | 3.826223911  | -5.787150867 | 4.835444144   |
| H326  | 3.850572987  | 3.477474450  | 8.165736852   |
| H327  | 4.256661663  | -3.249605055 | 9.118400550   |
| H328  | 3.135807420  | -2.307199577 | 7.033082959   |
| H329  | 7.419319116  | 9.224290425  | 8.282871627   |
| H330  | 5.321034832  | 1.930216461  | -0.680574383  |
| H331  | 8.822848003  | 3.424078170  | 3.930916596   |
| H332  | 7.436621052  | 1.597676627  | 2.664990143   |
| H333  | 9.362560619  | 5.759076066  | 3.755662311   |
| H334  | 4.501888297  | 5.944252901  | -0.517318044  |
| H335  | 4.025964101  | 2.152998836  | 11.817901932  |
| H336  | 4.317264991  | 0.494770421  | 8.699878008   |
| H337  | 5.623448503  | 1.592767750  | 8.215819009   |
| H338  | 2.614059784  | 2.206987427  | 8.400888461   |
| H339  | 1.824221786  | -4.482406949 | 4.525998867   |
| H340  | -2.563155415 | -6.269898755 | 1.147532644   |
| H341  | -4.701611481 | -6.302939078 | 2.530593854   |
| H342  | 2.613558300  | 2.883676895  | 4.691365754   |
| H343  | 9.016062150  | 4.072298795  | 5.330029583   |
| H344  | 7.958905082  | 5.097059051  | 7.037829430   |
| H345  | 4.184004369  | 5.058794453  | -1.947899023  |
| H346  | 6.681380183  | -2.438258914 | 9.354012095   |
| H347  | 7.126927590  | 0.153221139  | 6.279380189   |
| H348  | 1.103376218  | -5.315534954 | 5.933597420   |
| H349  | 4.101488568  | -8.373473610 | -0.885180425  |
| H350  | 7.253170942  | 3.688237455  | -2.776756890  |
| H351  | 7.387711813  | 1.970973865  | -2.345731315  |
| H352  | 9.977659019  | -2.590315271 | 7.658800068   |
| H353  | 9.466957984  | -1.432714114 | 8.697650277   |
| H354  | 11.120951857 | 2.570299584  | 7.304728057   |
| H355  | 9.350656194  | 1.183478396  | 7.717923548   |
| H356  | 12.498137533 | 0.214543347  | 7.131238891   |
| H357  | 10.789270201 | 2.264162283  | 5.584286695   |
| H358  | 10.117798857 | 2.231041406  | -2.188543680  |
| H359  | -4.181717367 | -3.009630470 | -13.110613898 |
| H360  | 10.380107701 | 8.244037679  | 2.392946893   |
| H361  | 9.704070585  | 6.111832605  | 0.810167932   |
| H362  | -5.809150488 | -4.586414886 | -11.111968526 |
| H363  | -4.763097165 | -1.806067019 | -10.300906572 |
| H364  | -6.463015357 | -2.229729263 | -10.562562307 |
| H365  | 1.508536393  | 0.354674947  | 3.473183064   |
| H366  | -6.710778695 | -4.928106065 | -4.683528145  |
| H367  | 0.247233396  | 0.277171280  | 1.301048922   |
| H368  | -1.686248250 | -0.722617936 | 0.551910739   |
| M0369 | 4.297174107  | -0.203461678 | 4.700316171   |
| N370  | 2.477629582  | 1.743531226  | -0.119029358  |
| N371  | 2.393855695  | 0.626523171  | -0.178041501  |
| N372  | -6.240360402 | 2.673055440  | 7.120230941   |
| N373  | -8.579692429 | 3.227726753  | 4.271240221   |
| N374  | -8.494294121 | 5.871189352  | 3.252759479   |
| N375  | -5.859853302 | 6.683039227  | 3.814245744   |
| N376  | -4.340535339 | 4.855598235  | 2.210213692   |
| N377  | -5.229157186 | 5.733559265  | -0.343398745  |
| N378  | -4.570820146 | 8.553413129  | -0.407219117  |
| N379  | -1.926685500 | 8.962107362  | 0.657762557   |
| N380  | -0.243324556 | 7.061704154  | -0.428599524  |
| N381  | -0.909837113 | 6.064113217  | -3.215742824  |
| N382  | -1.691218657 | 8.538896737  | -4.375228371  |
| N383  | 6.195924718  | 10.158331901 | 6.753371216   |
| N384  | 6.798126083  | 7.897258086  | 5.435982082   |

|      |               |              |               |
|------|---------------|--------------|---------------|
| N385 | 5.201286882   | 3.893424808  | 0.908352693   |
| N386 | 4.322242465   | 5.040187670  | -0.941747066  |
| N387 | 4.998390258   | 2.820813498  | -1.119964156  |
| N388 | 9.355410313   | 6.721507836  | 3.352466376   |
| N389 | -5.474006779  | -1.291496758 | 4.432138857   |
| N390 | -1.207964335  | -0.298614251 | 6.343100191   |
| N391 | -5.907836911  | -1.803213567 | 1.853815498   |
| N392 | -8.358998671  | -1.235075035 | 0.700271204   |
| N393 | -7.868348084  | 1.306816247  | -0.400468497  |
| N394 | -5.902759720  | 0.926621006  | -2.398045941  |
| N395 | -3.312602249  | -2.356380162 | -1.629798399  |
| N396 | -2.324850925  | -1.004128074 | -0.194341367  |
| N397 | -6.850497671  | 0.190119769  | -4.896012772  |
| N398 | -10.363518057 | -2.548992409 | -6.528218026  |
| N399 | -10.440892383 | -2.299510596 | -8.731731745  |
| N400 | 9.054680716   | 1.261589260  | -4.350931634  |
| N401 | 5.795746376   | -3.514825492 | -7.286237870  |
| N402 | 3.906661021   | -6.475256083 | -6.644062659  |
| N403 | 1.427099710   | -6.521918598 | -5.332536983  |
| N404 | -3.024234282  | -6.867805567 | -3.115450886  |
| N405 | -2.837837037  | -8.910832421 | -4.249588832  |
| N406 | -4.271281513  | -7.267168831 | -5.034063116  |
| N407 | 0.392144023   | -3.847306335 | -5.413195439  |
| N408 | 0.366405098   | -3.413719506 | -8.195781054  |
| N409 | -1.201280992  | -4.891987695 | -10.041978331 |
| N410 | -2.244196615  | -6.888882363 | -7.736092047  |
| N411 | -3.753546058  | -4.237557446 | -10.889549144 |
| N412 | 5.028537027   | -6.975244033 | 8.353470240   |
| N413 | 3.087483296   | -5.798226632 | 5.549043094   |
| N414 | 1.741434360   | -6.637969032 | 2.959789003   |
| N415 | 3.587892488   | -7.556257139 | 0.977787352   |
| N416 | -0.893389603  | -7.596224986 | 7.369313423   |
| N417 | -2.699309146  | -7.086449772 | 5.203598752   |
| N418 | 9.153722934   | -2.053259344 | 7.944286020   |
| N419 | 5.028375499   | -1.343596838 | 6.691781775   |
| N420 | 4.723957704   | -2.640508585 | 8.452555694   |
| N421 | 9.981041769   | 0.868694119  | 6.980315639   |
| N422 | 0.037345063   | -1.118784701 | -2.300617456  |
| N423 | 0.872141831   | -1.141805749 | -1.547198855  |
| O424 | -6.368484413  | 3.736461528  | 4.450421211   |
| O425 | -7.614986359  | 5.044076775  | 1.320589218   |
| O426 | -6.056780580  | 8.307452670  | 2.215535062   |
| O427 | -2.802297992  | 6.520007700  | 2.011410199   |
| O428 | -3.250535674  | 5.000899693  | -1.191612841  |
| O429 | -4.080017070  | 8.204623308  | -2.611083137  |
| O430 | -1.805947586  | 10.908596669 | -0.551831097  |
| O431 | 1.606077030   | 7.991320338  | 0.576295426   |
| O432 | 1.328406222   | 6.489149050  | -3.340415962  |
| O433 | -0.395752486  | 7.966493814  | -6.149893272  |
| O434 | -0.078419779  | 11.480423489 | -5.643336627  |
| O435 | 7.582769743   | 6.828395827  | 7.332476107   |
| O436 | 8.177467076   | 8.678748571  | 3.088775887   |
| O437 | 11.727747693  | 6.335333026  | 0.689355673   |
| O438 | -5.617831687  | 0.382829543  | 1.216961272   |
| O439 | -3.143398928  | -1.461575415 | 6.072796958   |
| O440 | -7.505844199  | -1.653029875 | -1.372805707  |
| O441 | -6.549195646  | -4.533336251 | -0.603714868  |
| O442 | -9.984697905  | 1.341131145  | -1.292353003  |
| O443 | -5.965719851  | 3.144763273  | -2.936622097  |
| O444 | -4.939839254  | 0.970214352  | -5.863774766  |
| O445 | -7.591354004  | 1.187071350  | -8.213552536  |
| O446 | 10.220226543  | 4.185933941  | -2.770693575  |

|  |                                 |              |              |               |
|--|---------------------------------|--------------|--------------|---------------|
|  | O447                            | 2.966364973  | 1.368180297  | -6.577120005  |
|  | O448                            | 3.110403294  | -4.624840072 | -7.709117102  |
|  | O449                            | 0.486238266  | -7.650227241 | -7.100796899  |
|  | O450                            | -1.677869794 | -4.819690040 | -5.384912109  |
|  | O451                            | -1.255248093 | -1.819372704 | -7.920550917  |
|  | O452                            | 1.882225172  | -1.346205094 | -6.440268988  |
|  | O453                            | -0.110330954 | -3.924247929 | -11.806779026 |
|  | O454                            | -3.852626469 | -6.029371704 | -12.297420306 |
|  | O455                            | -4.165188071 | -7.091117471 | -8.956143335  |
|  | O456                            | -6.219726691 | -3.082681393 | -13.231695243 |
|  | O457                            | -5.793011924 | -4.662424020 | -4.886674121  |
|  | O458                            | 2.633468252  | -5.706087337 | 7.800585642   |
|  | O459                            | 0.249260997  | -7.282106103 | 4.573662251   |
|  | O460                            | 2.064692175  | -9.108589294 | 0.276817407   |
|  | O461                            | 6.500963097  | -9.427030030 | -0.106771725  |
|  | O462                            | -4.267084929 | -6.705194997 | 6.817438328   |
|  | O463                            | -0.549447666 | -2.322843780 | 8.619571527   |
|  | O464                            | 1.323102407  | -3.406043159 | 8.077710739   |
|  | O465                            | -3.605024953 | -8.570813277 | 2.100243256   |
|  | O466                            | 10.558629484 | -0.621819720 | 5.377034175   |
|  | O467                            | 13.289744433 | 1.490182667  | 5.749281514   |
|  | O468                            | 0.342019271  | 2.369188838  | 5.894164588   |
|  | O469                            | 0.916261910  | 4.017048938  | 7.272469857   |
|  | O470                            | 5.964855602  | 2.320403483  | 10.616726401  |
|  | O471                            | 3.773622800  | 1.860015929  | 10.916508382  |
|  | O472                            | 5.639567506  | 1.526644253  | 5.311962085   |
|  | O473                            | 5.550351544  | 3.601460984  | 6.188785473   |
|  | O474                            | 3.248908779  | 0.849355318  | 6.182262186   |
|  | O475                            | 9.399257093  | 4.071003837  | 4.412319748   |
|  | O476                            | 7.456494083  | 2.344960406  | 3.296589473   |
|  | O477                            | -4.610672623 | -4.551324008 | -2.540053024  |
|  | O478                            | 8.744335400  | 2.949162908  | 9.420575073   |
|  | O479                            | 8.093716923  | 4.127063327  | 6.883957871   |
|  | S480                            | 3.583291547  | -4.365937279 | -3.904379095  |
|  | S481                            | 2.058643606  | -3.620599366 | -0.405678255  |
|  | S482                            | 2.550912439  | -1.822316252 | 4.531918615   |
|  | S483                            | 3.789569338  | -0.998459718 | -2.105823167  |
|  | S484                            | 0.685139008  | -1.005098103 | 1.499517304   |
|  | S485                            | 4.302667933  | -4.642468407 | 2.682330716   |
|  | S486                            | 3.721024704  | 1.336657193  | 2.928058709   |
|  | S487                            | 5.681627621  | -3.574856937 | -0.626104153  |
|  | S488                            | 6.078984010  | -1.393856495 | 3.644622893   |
|  | S489                            | 6.367922088  | 0.302641398  | 0.392567331   |
|  | <b>5, 35(3/2)</b>               |              |              |               |
|  | <b>Fe1 3.24</b>                 |              |              |               |
|  | <b>Fe2 0.05</b>                 |              |              |               |
|  | <b>Fe3 -2.62</b>                |              |              |               |
|  | <b>Fe4 2.89</b>                 |              |              |               |
|  | <b>Fe5 -2.37</b>                |              |              |               |
|  | <b>Fe6 -1.34</b>                |              |              |               |
|  | <b>Fe7 2.40</b>                 |              |              |               |
|  | <b>bm12b2n2x6x2n2n353.car_2</b> |              |              |               |
|  | C1                              | -7.574040734 | -5.791900303 | 0.186637726   |
|  | C2                              | -7.565355451 | -7.018225222 | -0.729612212  |
|  | C3                              | -8.841243906 | -3.849845613 | 0.998912391   |
|  | C4                              | -8.622822371 | -4.014624201 | 2.500678135   |
|  | C5                              | -8.770770291 | -5.460010770 | 4.462052181   |
|  | C6                              | -7.288502139 | -5.557966799 | 4.843954922   |
|  | C7                              | -5.020142074 | -6.085517351 | 4.088507668   |
|  | C8                              | -4.358407477 | -4.705024696 | 4.012758848   |
|  | C9                              | -4.296297380 | -2.510553672 | 2.950250117   |
|  | C10                             | -4.653412683 | -1.654548309 | 4.173680925   |
|  | C11                             | -6.254061666 | -1.104789913 | 5.907754699   |
|  | C12                             | -5.580984738 | -1.582467459 | 7.202389164   |
|  | C13                             | -5.113973152 | -3.485743268 | 8.670821671   |
|  | C14                             | -3.616527908 | -3.780959746 | 8.823503649   |
|  | C15                             | -1.538453318 | -4.492829115 | 7.718418393   |
|  | C16                             | -0.545061071 | -3.475339696 | 7.152883280   |
|  | C17                             | -0.322128150 | -1.302733934 | 5.960744645   |
|  | C18                             | -0.506669136 | 0.006226807  | 6.747166896   |

|     |               |               |              |
|-----|---------------|---------------|--------------|
| C19 | -0.633485057  | -1.166201880  | 4.451658573  |
| C20 | -0.031394842  | 0.121438997   | 3.878340591  |
| C21 | -0.166315950  | -2.412418095  | 3.690387750  |
| C22 | -1.978321950  | 1.883823658   | 7.316474525  |
| C23 | -2.097748045  | 1.739185112   | 8.843888512  |
| C24 | -3.191835277  | 2.601890434   | 6.676270970  |
| C25 | -3.509719868  | 3.908438408   | 7.412070942  |
| C26 | -2.935555746  | 2.877617605   | 5.188310052  |
| C27 | -3.041983786  | 0.532833511   | 10.723568284 |
| C28 | -1.722406318  | 0.452318332   | 11.464723473 |
| C29 | 5.762257280   | -10.584790864 | 6.059876037  |
| C30 | 6.342063723   | -9.365579341  | 5.340158648  |
| C31 | 6.462999413   | -6.873424856  | 5.461662079  |
| C32 | 7.471954337   | -6.327356548  | 6.487933199  |
| C33 | 5.249873652   | -5.939673253  | 5.292552128  |
| C34 | 5.621959915   | -4.526855262  | 4.837060985  |
| C35 | 4.391909817   | -3.753859400  | 4.356345653  |
| C36 | 4.349768167   | -1.247791398  | 4.308235093  |
| C37 | 9.685320880   | -5.328264910  | 6.805673254  |
| C38 | 9.869145111   | -3.830023024  | 6.696482939  |
| C39 | -4.851021529  | -3.071018950  | -2.209913506 |
| C40 | -5.386649534  | -1.650811942  | -1.958428034 |
| C41 | -3.336103599  | -3.050095282  | -1.895651551 |
| C42 | -2.647660412  | -4.420083384  | -1.727945905 |
| C43 | -2.110774136  | -5.050864570  | -3.011492971 |
| C44 | -5.819925393  | 0.516631646   | -3.081192554 |
| C45 | -7.138694114  | 0.902369621   | -2.410494560 |
| C46 | -5.697768016  | 1.044018610   | -4.538468488 |
| C47 | -9.346644079  | 0.133945043   | -1.661605454 |
| C48 | -9.178018151  | 0.319683974   | -0.147187671 |
| C49 | -7.684552030  | 0.179554280   | 1.793352847  |
| C50 | -6.661973145  | 1.275851156   | 2.105362170  |
| C51 | -5.105318354  | 2.986428931   | 1.303343043  |
| C52 | -5.783438156  | 4.279669373   | 1.805348822  |
| C53 | -4.328825958  | 3.370871385   | 0.033991458  |
| C54 | -3.473078585  | 2.317104447   | -0.598188367 |
| C55 | -2.932242197  | 1.151277502   | -0.099445992 |
| C56 | -2.278299681  | 1.445132484   | -2.195765986 |
| C57 | -7.683745703  | 5.801145436   | 1.398310720  |
| C58 | -7.949193338  | 6.073120883   | 2.876705793  |
| C59 | -9.009074109  | 5.716111069   | 0.607324309  |
| C60 | -9.632672186  | 7.021944217   | 0.211980998  |
| C61 | -9.741620516  | 8.216654642   | 0.897073525  |
| C62 | -10.678499246 | 8.386033975   | -1.104192390 |
| C63 | 8.230399442   | 2.442751183   | 4.984319239  |
| C64 | 9.247412627   | 1.323877573   | 5.101444566  |
| C65 | 6.888367647   | 1.787560458   | 4.580994963  |
| C66 | 5.746427365   | 2.773312384   | 4.505817359  |
| C67 | 4.946042102   | 3.060981125   | 5.626395301  |
| C68 | 5.448345241   | 3.431838451   | 3.299371752  |
| C69 | 3.880938375   | 3.965807803   | 5.547128156  |
| C70 | 4.399434113   | 4.345617172   | 3.207888352  |
| C71 | 3.611551001   | 4.608449153   | 4.331770092  |
| C72 | 5.320504957   | 7.434607780   | -0.881952438 |
| C73 | 4.264689494   | 8.355855636   | -1.505827130 |
| C74 | 4.702937632   | 6.064111789   | -0.564102089 |
| C75 | 3.444123320   | 9.410256282   | -3.568126052 |
| C76 | 2.066523419   | 8.787000009   | -3.801038285 |
| C77 | 0.712789426   | 6.722364591   | -3.814303378 |
| C78 | -0.078702141  | 6.687585523   | -2.490216750 |
| C79 | 0.985633734   | 5.318445989   | -4.385928367 |
| C80 | -0.225345419  | 4.415681748   | -4.648690674 |

|       |              |               |              |
|-------|--------------|---------------|--------------|
| C81   | -1.142145700 | 4.798181761   | -5.825211980 |
| C82   | -2.609274302 | 6.822843153   | -5.828281617 |
| C83   | -0.065361463 | 6.465157450   | -0.061163900 |
| C84   | -0.373077882 | 7.863707630   | 0.507488949  |
| C85   | 0.688399070  | 5.670445833   | 1.012906244  |
| C86   | 0.537232570  | 10.091779590  | 0.924631781  |
| C87   | -0.183145514 | 11.334825722  | 0.409425398  |
| C88   | -1.602969918 | 12.333638180  | -1.335988615 |
| C89   | -3.032713076 | 12.663109765  | -0.854173862 |
| C90   | -1.565959222 | 12.188454165  | -2.874417295 |
| C91   | -2.395128030 | 10.998275675  | -3.345880929 |
| C92   | -5.025765522 | 11.850895598  | 0.335843438  |
| C93   | -5.190641698 | 12.961938630  | 1.366637118  |
| C94   | -5.527821353 | 10.507082739  | 0.927957677  |
| C95   | -5.522257545 | 9.380645526   | -0.081055645 |
| C96   | -6.603154499 | 9.201708331   | -0.959861296 |
| C97   | -4.424140497 | 8.511183706   | -0.196164224 |
| C98   | -6.584681425 | 8.201231636   | -1.935660263 |
| C99   | -4.377906063 | 7.518477993   | -1.180685505 |
| C100  | -5.462562508 | 7.377998093   | -2.045803181 |
| C101  | 5.842158027  | -4.175847112  | -7.830277047 |
| C102  | 4.341464530  | -4.029460150  | -7.634114453 |
| C103  | 2.555082953  | -2.557725381  | -6.737977065 |
| C104  | 2.075957935  | -1.295273246  | -7.462614489 |
| C105  | 2.286256100  | 1.138247956   | -7.592151865 |
| C106  | 3.357547106  | 2.224765698   | -7.568607549 |
| C107  | 5.487424367  | 3.057983231   | -6.703363076 |
| C108  | 6.596773939  | 3.007081353   | -7.737112245 |
| C109  | -0.882961190 | -4.290500690  | -9.166285231 |
| C110  | -2.013658847 | -3.254158682  | -9.119682901 |
| C111  | -0.609089578 | -4.826223573  | -7.741601925 |
| C112  | 0.241739971  | -6.108491698  | -7.779775351 |
| C113  | 0.751015693  | -6.457959628  | -6.399512906 |
| C114  | -2.656868629 | -0.926328927  | -8.719759753 |
| C115  | -2.149871573 | 0.348541892   | -9.366598707 |
| C116  | -3.241923652 | -0.740890297  | -7.296772156 |
| C117  | -2.152044570 | -0.684194784  | -6.260635129 |
| C118  | -1.453614813 | 0.508342003   | -6.009843722 |
| C119  | -1.720540209 | -1.864392857  | -5.630868374 |
| C120  | -0.313162125 | 0.501210991   | -5.203584572 |
| C121  | -0.576518561 | -1.871602292  | -4.828955853 |
| C122  | 0.148730902  | -0.690828649  | -4.642284529 |
| C123  | 9.019006621  | -5.877013390  | -2.737445945 |
| C124  | 9.993716064  | -5.806923791  | -1.552763193 |
| C125  | 7.658735612  | -6.468833577  | -2.337081281 |
| C126  | 6.591155399  | -6.404099125  | -3.384438260 |
| C127  | 6.541791640  | -7.092809208  | -4.580053942 |
| C128  | 4.654806328  | -5.970716602  | -4.294049431 |
| C129  | 10.969233816 | -6.844868968  | 0.415293713  |
| C130  | 12.384390224 | -6.531958368  | -0.018094087 |
| C131  | 1.076158452  | -7.029717098  | 0.539141509  |
| C132  | 2.444769063  | -6.571827882  | 0.959058128  |
| C133  | 3.566889232  | -6.838910561  | -0.125245668 |
| C134  | 3.601612895  | -8.352020195  | -0.478397731 |
| C135  | 4.764190156  | -8.690956979  | -1.426082082 |
| C136  | 4.997637157  | -10.164085527 | -1.592323031 |
| C137  | 4.929759774  | -6.500446070  | 0.559551337  |
| C138  | 3.936226967  | -0.590570823  | -1.476945546 |
| Fe139 | 4.500923401  | -1.939755302  | -2.919232792 |
| Fe140 | 2.340885114  | 0.701533600   | -0.706474795 |
| Fe141 | 5.184113667  | 0.699864450   | -0.585236885 |
| Fe142 | 4.312460917  | 0.601488990   | -2.995940579 |



|       |              |              |              |
|-------|--------------|--------------|--------------|
| Fe143 | 4.170700422  | 2.942181777  | -1.669002353 |
| Fe144 | 5.068897608  | -1.843306545 | -0.426234304 |
| Fe145 | 2.600295793  | -2.439749792 | -1.250505299 |
| H146  | -5.672153872 | -7.619312702 | -0.270954107 |
| H147  | -5.773572363 | -6.832908507 | -1.698513740 |
| H148  | -9.471699464 | -5.303827741 | -0.435859712 |
| H149  | -8.153644577 | -6.804241842 | -1.635221566 |
| H150  | -8.111288730 | -7.812270434 | -0.190771946 |
| H151  | -8.104071937 | -3.108947898 | 0.657052478  |
| H152  | -9.415128438 | -5.909011067 | 2.457642257  |
| H153  | -9.843654342 | -3.430406215 | 0.836849100  |
| H154  | -9.263368669 | -6.405742380 | 4.724723280  |
| H155  | -6.813543892 | -6.164194933 | 2.939241348  |
| H156  | -9.207163162 | -4.663205705 | 5.079168146  |
| H157  | -3.200842264 | -2.507409413 | 2.876771681  |
| H158  | -5.475413016 | -4.211024189 | 2.346086404  |
| H159  | -4.576116997 | -6.743126202 | 3.328525464  |
| H160  | -5.987805069 | -0.049013723 | 5.768997530  |
| H161  | -6.557011658 | -2.469593446 | 4.269204012  |
| H162  | -4.791567016 | -6.495960716 | 5.079258734  |
| H163  | -4.702810483 | -2.048315042 | 2.038863884  |
| H164  | -6.006314910 | -3.554349686 | 6.733621839  |
| H165  | -7.343875807 | -1.177308673 | 6.030296801  |
| H166  | -0.632160846 | -3.323850690 | 4.094553078  |
| H167  | -0.440233005 | -2.335573504 | 2.626372572  |
| H168  | 0.927148672  | -2.525226907 | 3.740230561  |
| H169  | -1.727953418 | -1.099025879 | 4.347375009  |
| H170  | -5.651055750 | -4.430998949 | 8.835341624  |
| H171  | -2.778284668 | 1.955819447  | 4.610892246  |
| H172  | -3.423692893 | 0.145725171  | 8.660040150  |
| H173  | -3.777240695 | 3.741128812  | 8.465377394  |
| H174  | -0.212145535 | 0.171200223  | 2.794906987  |
| H175  | 1.056362168  | 0.158752687  | 4.032741955  |
| H176  | 8.102852939  | 2.880762563  | 5.993591789  |
| H177  | -3.797483048 | 3.397944785  | 4.746888666  |
| H178  | -4.353249617 | 4.414729613  | 6.920913823  |
| H179  | -2.049227009 | 3.520812454  | 5.061757660  |
| H180  | -2.643453724 | 4.588430658  | 7.387514980  |
| H181  | -4.066407291 | 1.931461195  | 6.764434524  |
| H182  | -1.083552010 | 2.507734507  | 7.166583440  |
| H183  | -2.455525253 | 0.198627146  | 6.066934674  |
| H184  | -0.475431621 | 1.018499547  | 4.333350738  |
| H185  | 1.019148508  | 4.714892442  | 0.576085260  |
| H186  | -0.028893011 | 5.457465159  | 1.821356651  |
| H187  | 2.016666813  | 6.082637253  | 2.394146466  |
| H188  | 2.044602953  | 5.542223249  | 4.999147028  |
| H189  | 4.163723885  | 4.821382276  | 2.255693881  |
| H190  | 6.020672932  | 3.193319258  | 2.400805648  |
| H191  | 5.143374680  | 2.561910636  | 6.579169752  |
| H192  | -2.111322417 | -2.331275475 | 6.532630968  |
| H193  | -1.395291378 | -5.429969182 | 7.160546564  |
| H194  | -1.256734536 | -4.674984281 | 8.764091266  |
| H195  | -3.436191085 | -4.214055913 | 6.797022344  |
| H196  | -5.373535299 | -2.795921152 | 9.484398722  |
| H197  | 3.255143276  | 4.158336081  | 6.422260056  |
| H198  | 0.733084335  | -1.575440459 | 6.096562312  |
| H199  | -3.658028034 | 1.324209394  | 11.182463796 |
| H200  | -3.558224549 | -0.427959682 | 10.878564970 |
| H201  | -0.863491279 | 0.078146389  | 10.860784790 |
| H202  | 10.642289669 | -5.831108617 | 6.598873904  |
| H203  | -0.537513271 | -6.152303275 | -3.728302868 |
| H204  | 1.430643338  | -8.680884302 | 1.472423166  |

|      |               |              |               |
|------|---------------|--------------|---------------|
| H205 | -0.376355820  | -6.944635832 | -8.138659920  |
| H206 | 1.086315884   | -5.980736758 | -8.472804189  |
| H207 | -1.559663024  | -5.040634200 | -7.229920981  |
| H208 | -1.432053815  | 0.180699344  | -10.203880808 |
| H209 | -1.313966765  | -5.118394639 | -9.750595830  |
| H210 | -2.827567841  | -2.465662029 | -2.679666773  |
| H211 | -3.349189140  | -5.145364211 | -1.280915649  |
| H212 | -0.677861851  | -1.748632582 | -8.615202957  |
| H213 | -3.490749455  | -1.248640474 | -9.376085606  |
| H214 | 0.806718928   | -3.100025374 | -9.374653683  |
| H215 | -0.399309495  | -5.716340789 | -2.029013924  |
| H216 | -0.108371534  | -4.041232999 | -7.154451452  |
| H217 | 0.914526966   | -4.565820301 | -10.120170144 |
| H218 | -5.990702771  | -4.014319173 | -3.648391008  |
| H219 | -3.210782496  | -2.499546207 | -0.952073281  |
| H220 | 2.483376163   | -5.659769997 | -6.893941062  |
| H221 | -1.823218056  | -4.314879392 | -1.007729694  |
| H222 | -4.420776475  | 2.670308778  | 2.102980910   |
| H223 | -3.001127047  | 0.669183857  | 0.869531252   |
| H224 | -8.618768455  | 0.463985042  | 2.295996154   |
| H225 | -7.242994421  | -0.449083203 | -0.196346046  |
| H226 | -7.404031357  | 3.823093329  | 0.636020276   |
| H227 | -9.394543322  | 8.530887254  | 1.874584622   |
| H228 | -8.147641908  | 5.152143330  | 3.478736286   |
| H229 | -9.726234532  | 5.088533478  | 1.165669812   |
| H230 | -7.058809988  | 6.618550980  | 1.002828249   |
| H231 | -11.198595062 | 8.833557761  | -1.946344614  |
| H232 | -3.698512125  | 4.235257781  | 0.302573160   |
| H233 | -5.044587290  | 3.731255478  | -0.722562432  |
| H234 | -10.642533527 | 10.041509251 | 0.234246388   |
| H235 | -8.798668800  | 5.180294697  | -0.330976694  |
| H236 | -6.334357093  | 1.693866085  | 0.096215213   |
| H237 | -7.332287455  | -0.746651021 | 2.270851554   |
| H238 | -9.907768812  | 1.009929140  | -2.015611466  |
| H239 | -1.770853218  | 1.255504288  | -3.137527098  |
| H240 | -9.977933542  | -0.749229554 | -1.829084609  |
| H241 | 9.428806898   | 3.976780337  | 4.345323231   |
| H242 | 7.912208736   | 4.035923302  | 3.739096839   |
| H243 | 1.612394705   | 6.173590789  | -1.403546603  |
| H244 | -1.039929305  | 5.980096700  | -0.215192907  |
| H245 | 1.315937127   | 8.622274781  | -0.374916159  |
| H246 | -3.676035771  | 3.606164261  | -3.027876198  |
| H247 | -5.273574160  | 2.980004671  | -4.306838290  |
| H248 | -4.615036740  | 4.885019408  | -3.226744977  |
| H249 | -4.674922604  | 0.797209101  | -4.878235282  |
| H250 | -6.407182683  | 0.487157483  | -5.172479656  |
| H251 | -0.515297037  | 12.100870608 | -3.187118951  |
| H252 | -1.993701385  | 13.101053850 | -3.309004574  |
| H253 | -0.685957571  | 9.794221552  | -3.614545633  |
| H254 | -2.234354877  | 9.000230357  | -3.748323913  |
| H255 | -2.199520170  | 8.371194602  | -7.101729671  |
| H256 | -1.530100605  | 3.887111048  | -6.304124414  |
| H257 | -7.438056615  | 8.060460356  | -2.603234048  |
| H258 | -3.578201683  | 8.589750478  | 0.493236465   |
| H259 | -4.114882702  | 7.080315107  | -4.446106953  |
| H260 | 1.651623773   | 4.778572097  | -3.694258401  |
| H261 | 2.788422900   | 6.911713939  | -3.331783578  |
| H262 | -0.828169238  | 4.285816454  | -3.736645888  |
| H263 | -7.914070582  | -0.939784112 | -2.840338075  |
| H264 | 3.873336134   | 9.656203308  | -4.549222836  |
| H265 | -5.377065273  | -1.453993417 | -3.943819130  |
| H266 | 1.544978911   | 5.455304655  | -5.326780193  |

|      |              |               |              |
|------|--------------|---------------|--------------|
| H267 | -3.495081391 | 6.887069197   | -1.291486244 |
| H268 | 3.272605165  | 10.352872817  | -3.030493324 |
| H269 | -1.426439985 | 6.884784469   | -7.508861791 |
| H270 | -4.051138089 | 8.264470317   | -5.700219151 |
| H271 | -4.343840758 | -4.103728626  | -3.913377635 |
| H272 | -5.342266206 | -3.709013156  | -1.450353242 |
| H273 | -7.479900721 | 9.849650332   | -0.884170754 |
| H274 | -5.049666093 | 1.010594139   | -2.470897165 |
| H275 | 0.084109097  | 7.299560413   | -4.505456687 |
| H276 | -0.564212216 | 5.331445584   | -6.591279334 |
| H277 | 0.190222379  | 3.422693709   | -4.867147016 |
| H278 | -2.950064647 | 5.136108230   | -4.740306418 |
| H279 | 0.125316040  | 9.892595819   | 1.926045306  |
| H280 | -0.964940863 | 10.283521579  | -1.168452512 |
| H281 | -1.001064377 | 13.211503339  | -1.058646635 |
| H282 | 1.593931930  | 10.367936730  | 1.045551584  |
| H283 | -3.123549691 | 10.876444959  | 0.127007826  |
| H284 | 6.301384228  | -3.184535941  | -7.957704097 |
| H285 | 6.229754185  | -4.591722411  | -6.877368190 |
| H286 | 8.871476592  | -4.834560896  | -3.055773080 |
| H287 | 7.091718410  | -5.322666777  | -8.966094668 |
| H288 | 5.538230670  | -5.846000565  | -8.950150751 |
| H289 | 5.494547994  | 5.421496409   | -0.157997387 |
| H290 | 5.109086408  | 8.268632518   | 0.964406376  |
| H291 | 5.128359957  | 8.108411302   | -3.352145266 |
| H292 | 3.918370745  | 6.193612308   | 0.195258869  |
| H293 | 6.374728409  | 8.873929688   | 0.127437206  |
| H294 | 5.941063996  | 2.973579370   | -5.703397512 |
| H295 | 6.144352689  | 7.290416601   | -1.598671152 |
| H296 | 4.693668937  | -5.903459355  | 6.244404475  |
| H297 | 6.952333576  | -7.005283657  | 4.489121471  |
| H298 | 4.615472387  | 1.167581656   | -6.283448831 |
| H299 | 4.353088193  | 0.772366471   | 3.958610564  |
| H300 | 2.007125329  | 0.974464464   | -8.641565443 |
| H301 | -0.243225090 | -2.797424604  | -4.352582302 |
| H302 | 1.398541618  | 1.572786049   | -7.103319741 |
| H303 | 3.648398849  | -3.643965856  | 5.156631636  |
| H304 | 3.177639928  | -0.212336539  | -6.131511710 |
| H305 | 3.897233884  | -4.310338969  | 3.544715014  |
| H306 | 4.593217382  | -6.410405400  | 4.542656273  |
| H307 | 6.334670889  | -4.572491008  | 3.999992583  |
| H308 | 6.110194472  | -3.969704763  | 5.652874985  |
| H309 | -3.917531415 | -1.585861564  | -7.100643926 |
| H310 | 5.496190345  | -8.272107279  | 6.783986774  |
| H311 | 4.959388801  | -10.966845901 | 5.410960918  |
| H312 | 1.062521870  | -0.681679037  | -4.049753710 |
| H313 | 5.917394458  | -10.394662949 | 8.105580899  |
| H314 | 4.447849207  | -10.920596462 | 7.607717360  |
| H315 | 5.179145245  | -2.422767273  | 2.900047964  |
| H316 | 0.244214365  | 1.416666829   | -5.000659585 |
| H317 | -2.278571520 | -2.791368442  | -5.781334896 |
| H318 | 8.352054908  | -9.317976150  | 0.785602376  |
| H319 | 7.801780314  | -7.529064200  | -2.060932136 |
| H320 | 6.915310119  | -7.637894135  | 1.806328161  |
| H321 | 7.850623340  | -10.189307000 | -0.387917582 |
| H322 | 6.496702932  | 2.201828839   | -8.504849548 |
| H323 | 6.698795533  | -4.603973941  | 1.136100276  |
| H324 | 2.747892271  | -7.050003854  | 1.902959042  |
| H325 | 4.638036858  | -2.231399064  | -6.689100378 |
| H326 | 3.707805645  | -8.928211309  | 0.454214502  |
| H327 | 4.946322392  | -7.169584248  | -6.010019504 |
| H328 | 3.650356449  | -5.608012159  | -4.474127716 |

|       |              |               |              |
|-------|--------------|---------------|--------------|
| H329  | 6.557517641  | -11.349846309 | 6.066358957  |
| H330  | 5.034812480  | -0.207164679  | 2.653429573  |
| H331  | 8.489215767  | -5.067193157  | 2.662942020  |
| H332  | 7.303351301  | -3.182271080  | 1.306335230  |
| H333  | 8.756223222  | -5.830170083  | 4.924512998  |
| H334  | 3.771657469  | -1.896614152  | 6.175921506  |
| H335  | 4.167645296  | -11.762032525 | -2.175037331 |
| H336  | 4.558062345  | -8.246488976  | -2.411539242 |
| H337  | 5.704037854  | -8.263835427  | -1.058093845 |
| H338  | 2.649628414  | -8.628152616  | -0.954941212 |
| H339  | 2.481164833  | -2.433217689  | -5.646522996 |
| H340  | -1.794451960 | 1.435493567   | -6.477909624 |
| H341  | -3.842194345 | 0.181272265   | -7.308787467 |
| H342  | 2.409693945  | -5.483630453  | 1.102698416  |
| H343  | 8.666460314  | -6.608252934  | 2.729720513  |
| H344  | 7.564434028  | -8.571600517  | 2.869138264  |
| H345  | 3.488980793  | -0.237327664  | 5.869241060  |
| H346  | 7.265308721  | -7.741548070  | -5.060590911 |
| H347  | 7.293907989  | -5.955822333  | -1.438576805 |
| H348  | 1.925062758  | -3.391726586  | -7.053838161 |
| H349  | 4.999965252  | 4.044094057   | -6.767595968 |
| H350  | 6.666084442  | 1.004252681   | 5.320286981  |
| H351  | 7.025464176  | 1.296790549   | 3.604502475  |
| H352  | 10.481649758 | -6.137829163  | -4.152258837 |
| H353  | 9.892708496  | -7.547558514  | -3.565490570 |
| H354  | 10.981626272 | -7.851393874  | 0.862924316  |
| H355  | 9.406858374  | -7.663639062  | -0.780489592 |
| H356  | 12.629172915 | -6.825418540  | -1.067270936 |
| H357  | 10.650401583 | -6.138556624  | 1.198224232  |
| H358  | 9.724959131  | 1.031696300   | 4.135492261  |
| H359  | -4.252052922 | 13.268500546  | 1.886090655  |
| H360  | 9.405525352  | -5.541051897  | 7.852976350  |
| H361  | 8.961805349  | -3.262427443  | 6.378792622  |
| H362  | -5.646947924 | 12.118364021  | -0.534462784 |
| H363  | -4.902895959 | 10.241357155  | 1.795873507  |
| H364  | -6.546613748 | 10.680661284  | 1.303683427  |
| H365  | 1.511021003  | -3.453357824  | -0.966831459 |
| H366  | -6.252555689 | 6.338015913   | -3.488447521 |
| H367  | 0.267848322  | -1.326530612  | -0.255157569 |
| H368  | -1.557653050 | -0.189816394  | -1.088345034 |
| Mo369 | 4.468855829  | -4.306125451  | -1.508405814 |
| N370  | 2.246755894  | -0.671556188  | 1.912994034  |
| N371  | 2.310472414  | -0.164603325  | 0.912745474  |
| N372  | -6.252351248 | -7.517833040  | -1.108205472 |
| N373  | -8.737129183 | -5.085877927  | 0.233010385  |
| N374  | -8.998380640 | -5.195848285  | 3.051046056  |
| N375  | -6.460606334 | -6.052260187  | 3.890321160  |
| N376  | -4.799027198 | -3.875380520  | 3.033027680  |
| N377  | -5.871118102 | -1.868988227  | 4.732275501  |
| N378  | -5.552357863 | -2.927101980  | 7.402744310  |
| N379  | -2.938723485 | -4.107186929  | 7.687183183  |
| N380  | -1.095578865 | -2.375385713  | 6.578674537  |
| N381  | -1.737425412 | 0.589462985   | 6.679045342  |
| N382  | -2.861936045 | 0.713691193   | 9.297328135  |
| N383  | 5.205425767  | -10.274286273 | 7.382121822  |
| N384  | 6.019354153  | -8.187370350  | 5.905779179  |
| N385  | 4.741830474  | -2.434613038  | 3.826520853  |
| N386  | 3.681681051  | -1.157837898  | 5.485626977  |
| N387  | 4.586951399  | -0.146302331  | 3.594273687  |
| N388  | 8.621915084  | -5.837911023  | 5.959547947  |
| N389  | -5.113766194 | -3.492185328  | -3.589451186 |
| N390  | -0.929913707 | -5.692260260  | -2.901348522 |

|      |               |              |              |
|------|---------------|--------------|--------------|
| N391 | -5.578886126  | -0.922444962 | -3.084516820 |
| N392 | -8.120127880  | -0.036622952 | -2.420265907 |
| N393 | -7.988015311  | -0.054909125 | 0.394658042  |
| N394 | -6.065043556  | 1.913928745  | 1.057491306  |
| N395 | -3.061247954  | 2.482995836  | -1.911795674 |
| N396 | -2.188053049  | 0.614333342  | -1.129559858 |
| N397 | -7.004177041  | 4.520884750  | 1.258822314  |
| N398 | -10.221892670 | 7.141765959  | -1.037487828 |
| N399 | -10.407539273 | 9.071295974  | 0.042889469  |
| N400 | 8.677844258   | 3.394625536  | 3.965513056  |
| N401 | 5.886852795   | 8.001584445  | 0.351429549  |
| N402 | 4.395498081   | 8.592957037  | -2.840661521 |
| N403 | 1.978099220   | 7.444130579  | -3.687844427 |
| N404 | -2.306175190  | 5.595198902  | -5.421119258 |
| N405 | -1.923854460  | 7.436631042  | -6.818240384 |
| N406 | -3.570008432  | 7.530366408  | -5.187005112 |
| N407 | 0.632306886   | 6.490273103  | -1.345475652 |
| N408 | 0.459556842   | 8.876956019  | 0.127215772  |
| N409 | -0.994879544  | 11.179581357 | -0.678083873 |
| N410 | -1.706332151  | 9.837308623  | -3.502242160 |
| N411 | -3.636693966  | 11.729827123 | -0.079480370 |
| N412 | 6.120913817   | -5.005416861 | -9.006845037 |
| N413 | 3.936317139   | -2.872491476 | -7.080516640 |
| N414 | 2.615276684   | -0.147925709 | -7.006530263 |
| N415 | 4.496645604   | 2.009327657  | -6.862183606 |
| N416 | 0.276202086   | -3.793024726 | -9.918288389 |
| N417 | -1.654237149  | -1.971287997 | -8.837550603 |
| N418 | 9.616949329   | -6.608799955 | -3.870721908 |
| N419 | 5.400428167   | -5.699863172 | -3.226425630 |
| N420 | 5.314255977   | -6.804930066 | -5.135942261 |
| N421 | 10.051411417  | -6.876099832 | -0.710530764 |
| N422 | 0.099678858   | 2.528548634  | -0.019703501 |
| N423 | 0.949652999   | 1.841285738  | -0.282113167 |
| O424 | -6.599274537  | -5.487375151 | 0.900732080  |
| O425 | -8.129643644  | -3.094113419 | 3.172748363  |
| O426 | -6.903872579  | -5.231982112 | 5.979872387  |
| O427 | -3.475389222  | -4.367658026 | 4.818228373  |
| O428 | -3.861502194  | -0.811485717 | 4.621467435  |
| O429 | -5.132685011  | -0.770254694 | 8.029215866  |
| O430 | -3.099111596  | -3.753735649 | 9.948953119  |
| O431 | 0.673051808   | -3.695615734 | 7.223993011  |
| O432 | 0.424777413   | 0.497924336  | 7.401021840  |
| O433 | -1.521569095  | 2.517143141  | 9.622707257  |
| O434 | -1.608439815  | 0.709651284  | 12.654295251 |
| O435 | 7.026716204   | -9.522461689 | 4.307066479  |
| O436 | 7.221500649   | -6.359839700 | 7.706077841  |
| O437 | 10.917955453  | -3.260030353 | 6.952844054  |
| O438 | -5.594278322  | -1.217346632 | -0.806368519 |
| O439 | -2.740162563  | -5.003103513 | -4.092198185 |
| O440 | -7.274071760  | 2.000124086  | -1.844350004 |
| O441 | -5.995436283  | 2.414616713  | -4.691275364 |
| O442 | -10.126263124 | 0.776073644  | 0.509570505  |
| O443 | -6.409311180  | 1.547789667  | 3.285518754  |
| O444 | -5.216813621  | 5.071069122  | 2.567727024  |
| O445 | -7.994699655  | 7.184786207  | 3.378028176  |
| O446 | 9.519699693   | 0.748324119  | 6.146023329  |
| O447 | 2.566889008   | 5.497494135  | 4.177269974  |
| O448 | 3.345505804   | 8.862917333  | -0.836500265 |
| O449 | 1.116868382   | 9.532424576  | -4.118347183 |
| O450 | -1.309607001  | 6.855073196  | -2.498472382 |
| O451 | -1.306086426  | 8.017044758  | 1.307909918  |
| O452 | 1.798910082   | 6.428523374  | 1.504516359  |

|  |                                |              |               |              |
|--|--------------------------------|--------------|---------------|--------------|
|  | O453                           | -0.036090887 | 12.414963082  | 0.996554801  |
|  | O454                           | -3.572847257 | 13.734616739  | -1.166067935 |
|  | O455                           | -3.625637621 | 11.077283455  | -3.487128124 |
|  | O456                           | -6.269440054 | 13.467027589  | 1.633456745  |
|  | O457                           | -5.380508398 | 6.405166247   | -3.052674413 |
|  | O458                           | 3.564944871  | -4.968132411  | -7.950783751 |
|  | O459                           | 1.265735024  | -1.347824658  | -8.415110406 |
|  | O460                           | 3.132074958  | 3.285598275   | -8.176066259 |
|  | O461                           | 7.542936622  | 3.779069688   | -7.741700311 |
|  | O462                           | -3.197329270 | -3.584626865  | -9.306871492 |
|  | O463                           | 0.058520547  | -6.996026616  | -5.540042265 |
|  | O464                           | 2.020997522  | -6.110209585  | -6.118926681 |
|  | O465                           | -2.509313252 | 1.475474495   | -9.058415506 |
|  | O466                           | 10.772753334 | -4.845866062  | -1.407361615 |
|  | O467                           | 13.235958530 | -6.070734770  | 0.728909108  |
|  | O468                           | 0.274789708  | -6.389262617  | -0.124067353 |
|  | O469                           | 0.707920898  | -8.291119285  | 0.944249412  |
|  | O470                           | 6.031402057  | -10.762788451 | -1.301186670 |
|  | O471                           | 3.923736208  | -10.813748886 | -2.114831269 |
|  | O472                           | 5.618067390  | -5.563372318  | -0.002823996 |
|  | O473                           | 5.308273069  | -7.160560133  | 1.557541473  |
|  | O474                           | 3.360434992  | -6.069987492  | -1.249574860 |
|  | O475                           | 9.009715673  | -5.766974433  | 3.133115007  |
|  | O476                           | 7.235796492  | -4.047726915  | 1.756290148  |
|  | O477                           | -4.140440923 | 4.186513316   | -3.728479029 |
|  | O478                           | 8.674533820  | -9.922837942  | 0.070193443  |
|  | O479                           | 7.795324682  | -8.045978996  | 2.060900390  |
|  | S480                           | 3.944678750  | 5.240141737   | -2.040792440 |
|  | S481                           | 2.410715903  | 1.883384817   | -2.839293761 |
|  | S482                           | 2.914609489  | -3.523554418  | -3.138383261 |
|  | S483                           | 3.849530792  | 2.207163579   | 0.404102535  |
|  | S484                           | 0.848008056  | -0.957126933  | -1.436939611 |
|  | S485                           | 4.876204988  | -0.692958685  | -4.745330237 |
|  | S486                           | 3.625420017  | -3.286040633  | 0.507910430  |
|  | S487                           | 6.107338462  | 1.853612253   | -2.294047088 |
|  | S488                           | 6.325134591  | -2.873982878  | -1.967611530 |
|  | S489                           | 6.332903466  | -0.556107816  | 0.867788686  |
|  | <b>5, 35(5/2)</b>              |              |               |              |
|  | <b>Fe1</b>                     | <b>3.26</b>  |               |              |
|  | <b>Fe2</b>                     | <b>0.08</b>  |               |              |
|  | <b>Fe3</b>                     | <b>-2.68</b> |               |              |
|  | <b>Fe4</b>                     | <b>2.88</b>  |               |              |
|  | <b>Fe5</b>                     | <b>-2.41</b> |               |              |
|  | <b>Fe6</b>                     | <b>1.14</b>  |               |              |
|  | <b>Fe7</b>                     | <b>2.23</b>  |               |              |
|  | <b>bm12b2n2x6x2n2n35.car_2</b> |              |               |              |
|  | C1                             | -7.569559764 | -5.787374962  | 0.182327338  |
|  | C2                             | -7.560834400 | -7.015403245  | -0.731956566 |
|  | C3                             | -8.842539547 | -3.850453089  | 0.996208164  |
|  | C4                             | -8.616218940 | -4.014049775  | 2.497083719  |
|  | C5                             | -8.763750252 | -5.456571444  | 4.461989474  |
|  | C6                             | -7.282267908 | -5.554719759  | 4.843358061  |
|  | C7                             | -5.012342057 | -6.085849841  | 4.090297161  |
|  | C8                             | -4.352197195 | -4.706195029  | 4.010141639  |
|  | C9                             | -4.292374107 | -2.515206407  | 2.940369138  |
|  | C10                            | -4.650494966 | -1.654209674  | 4.160119084  |
|  | C11                            | -6.247815844 | -1.103341902  | 5.897474126  |
|  | C12                            | -5.566693885 | -1.575299770  | 7.189980656  |
|  | C13                            | -5.104248286 | -3.472426251  | 8.670104036  |
|  | C14                            | -3.608867781 | -3.773332081  | 8.819610748  |
|  | C15                            | -1.536442814 | -4.496816973  | 7.712797943  |
|  | C16                            | -0.536883775 | -3.477598322  | 7.156818131  |
|  | C17                            | -0.313345653 | -1.311114379  | 5.954549670  |
|  | C18                            | -0.488570966 | 0.001311226   | 6.738998302  |
|  | C19                            | -0.638551815 | -1.174936772  | 4.447680821  |
|  | C20                            | -0.045101599 | 0.114162488   | 3.869513046  |
|  | C21                            | -0.180580253 | -2.422422423  | 3.684101834  |
|  | C22                            | -1.957706028 | 1.881456897   | 7.312949914  |
|  | C23                            | -2.077120032 | 1.738020112   | 8.839629536  |

|     |               |               |              |
|-----|---------------|---------------|--------------|
| C24 | -3.170600155  | 2.597778138   | 6.671544564  |
| C25 | -3.489335864  | 3.904961630   | 7.405273464  |
| C26 | -2.915165787  | 2.870763844   | 5.182610458  |
| C27 | -3.027803598  | 0.537043758   | 10.719565968 |
| C28 | -1.712141717  | 0.447841922   | 11.467178142 |
| C29 | 5.763186366   | -10.582773157 | 6.068130507  |
| C30 | 6.330373556   | -9.362009454  | 5.341817516  |
| C31 | 6.455423830   | -6.869588004  | 5.462465993  |
| C32 | 7.465492265   | -6.324841280  | 6.490634940  |
| C33 | 5.246008034   | -5.934189268  | 5.289972245  |
| C34 | 5.623896842   | -4.521536730  | 4.838908711  |
| C35 | 4.397027954   | -3.742800581  | 4.359071535  |
| C36 | 4.344181717   | -1.238378795  | 4.317017851  |
| C37 | 9.681505408   | -5.333907706  | 6.809944118  |
| C38 | 9.868235801   | -3.835225633  | 6.705891285  |
| C39 | -4.849329374  | -3.055331689  | -2.198452635 |
| C40 | -5.383874943  | -1.633124976  | -1.956564543 |
| C41 | -3.333107690  | -3.031518532  | -1.896727124 |
| C42 | -2.643975363  | -4.401570162  | -1.724702767 |
| C43 | -2.109281765  | -5.035762172  | -3.007946324 |
| C44 | -5.852131293  | 0.519910629   | -3.096131639 |
| C45 | -7.191668174  | 0.899407789   | -2.459696236 |
| C46 | -5.685645382  | 1.040569917   | -4.551292186 |
| C47 | -9.361776347  | 0.087877674   | -1.653373068 |
| C48 | -9.178683804  | 0.301758956   | -0.143929634 |
| C49 | -7.669284419  | 0.182940749   | 1.787344137  |
| C50 | -6.658903307  | 1.287577676   | 2.107967626  |
| C51 | -5.084936407  | 2.990152241   | 1.313673484  |
| C52 | -5.766469292  | 4.282586982   | 1.811517631  |
| C53 | -4.307317716  | 3.374342190   | 0.044557003  |
| C54 | -3.465954007  | 2.313588999   | -0.596097582 |
| C55 | -2.923572084  | 1.147957682   | -0.098772555 |
| C56 | -2.302242521  | 1.425110490   | -2.207376016 |
| C57 | -7.671874177  | 5.795671779   | 1.399118230  |
| C58 | -7.947899140  | 6.070160650   | 2.873801778  |
| C59 | -8.993456282  | 5.704578407   | 0.599987278  |
| C60 | -9.620644666  | 7.007050761   | 0.201340632  |
| C61 | -9.736229663  | 8.201819976   | 0.885006153  |
| C62 | -10.666998369 | 8.365400067   | -1.119696038 |
| C63 | 8.215399524   | 2.431317947   | 4.996940283  |
| C64 | 9.230366269   | 1.309425901   | 5.112713216  |
| C65 | 6.872858601   | 1.779168994   | 4.589456351  |
| C66 | 5.731372446   | 2.765339030   | 4.511792412  |
| C67 | 4.932066812   | 3.056372572   | 5.632087584  |
| C68 | 5.430172723   | 3.417054552   | 3.302336890  |
| C69 | 3.863944537   | 3.957007709   | 5.550081903  |
| C70 | 4.377464536   | 4.326265793   | 3.207581687  |
| C71 | 3.590338515   | 4.591972778   | 4.331411378  |
| C72 | 5.315085760   | 7.429019564   | -0.880128399 |
| C73 | 4.259746782   | 8.351595999   | -1.503133544 |
| C74 | 4.693467796   | 6.061827626   | -0.555480933 |
| C75 | 3.438586794   | 9.413567791   | -3.561923033 |
| C76 | 2.064349544   | 8.788417155   | -3.807209360 |
| C77 | 0.711379664   | 6.723874585   | -3.819359713 |
| C78 | -0.078713411  | 6.681119497   | -2.494626461 |
| C79 | 0.985119613   | 5.325478561   | -4.402673601 |
| C80 | -0.224295305  | 4.421625087   | -4.668383656 |
| C81 | -1.147108640  | 4.810299003   | -5.838567706 |
| C82 | -2.612108838  | 6.835691068   | -5.833105943 |
| C83 | -0.067901774  | 6.454305225   | -0.066449781 |
| C84 | -0.376017410  | 7.852818110   | 0.503244606  |
| C85 | 0.682533871   | 5.660054220   | 1.010563189  |

|       |              |               |              |
|-------|--------------|---------------|--------------|
| C86   | 0.534663897  | 10.079711772  | 0.930900220  |
| C87   | -0.187080340 | 11.322255383  | 0.418572999  |
| C88   | -1.593032857 | 12.329006419  | -1.333706378 |
| C89   | -3.020171527 | 12.658954670  | -0.846781081 |
| C90   | -1.561317625 | 12.187981893  | -2.873058680 |
| C91   | -2.391421630 | 10.999490403  | -3.346341949 |
| C92   | -5.012953709 | 11.845113976  | 0.338764080  |
| C93   | -5.185919331 | 12.961531364  | 1.362231184  |
| C94   | -5.513405136 | 10.501080473  | 0.934199233  |
| C95   | -5.508538822 | 9.375953791   | -0.074737278 |
| C96   | -6.592335149 | 9.195348318   | -0.949360155 |
| C97   | -4.409056975 | 8.509460845   | -0.195471181 |
| C98   | -6.575472911 | 8.196257931   | -1.927039845 |
| C99   | -4.364055768 | 7.518277714   | -1.181629355 |
| C100  | -5.451458122 | 7.375617865   | -2.043192944 |
| C101  | 5.840990846  | -4.173838607  | -7.844164423 |
| C102  | 4.342049135  | -4.028334238  | -7.633133606 |
| C103  | 2.563465373  | -2.555411117  | -6.725258146 |
| C104  | 2.077259221  | -1.296105961  | -7.449958623 |
| C105  | 2.276591177  | 1.139066865   | -7.582555156 |
| C106  | 3.344673732  | 2.226714096   | -7.554083537 |
| C107  | 5.484704916  | 3.049588830   | -6.713645121 |
| C108  | 6.590248902  | 2.991142208   | -7.744259022 |
| C109  | -0.884623398 | -4.289864825  | -9.168617954 |
| C110  | -2.018272870 | -3.255609441  | -9.120315305 |
| C111  | -0.608669050 | -4.825196426  | -7.744419142 |
| C112  | 0.245332149  | -6.105270494  | -7.780370869 |
| C113  | 0.745479215  | -6.453730782  | -6.396551100 |
| C114  | -2.662137959 | -0.928026799  | -8.712235978 |
| C115  | -2.152014553 | 0.345143735   | -9.361337903 |
| C116  | -3.249788032 | -0.738284650  | -7.291933215 |
| C117  | -2.160791823 | -0.681022759  | -6.255004763 |
| C118  | -1.459326751 | 0.510729346   | -6.007515978 |
| C119  | -1.729205650 | -1.861536600  | -5.625617076 |
| C120  | -0.315464705 | 0.501589305   | -5.206407234 |
| C121  | -0.581201668 | -1.870044499  | -4.829485731 |
| C122  | 0.147096252  | -0.690893904  | -4.647437923 |
| C123  | 9.014395300  | -5.872727717  | -2.732518262 |
| C124  | 9.990148385  | -5.807836798  | -1.547342371 |
| C125  | 7.650901335  | -6.459157416  | -2.333962144 |
| C126  | 6.579751328  | -6.384471755  | -3.378622595 |
| C127  | 6.524081580  | -7.068989731  | -4.576303021 |
| C128  | 4.641035846  | -5.941877497  | -4.280302332 |
| C129  | 10.973600302 | -6.856707834  | 0.412350785  |
| C130  | 12.386352978 | -6.531436716  | -0.019864414 |
| C131  | 1.077285683  | -7.020795052  | 0.547109124  |
| C132  | 2.446422737  | -6.564361892  | 0.967189903  |
| C133  | 3.562480022  | -6.823382898  | -0.124756634 |
| C134  | 3.591992313  | -8.335388690  | -0.489977859 |
| C135  | 4.753554747  | -8.678127264  | -1.437481133 |
| C136  | 4.987829879  | -10.152653084 | -1.594683836 |
| C137  | 4.929826774  | -6.496069618  | 0.556761479  |
| C138  | 3.945686298  | -0.597512250  | -1.482615041 |
| Fe139 | 4.522020165  | -1.920084265  | -2.936585870 |
| Fe140 | 2.322215232  | 0.666249165   | -0.717410623 |
| Fe141 | 5.195312961  | 0.708983299   | -0.568337285 |
| Fe142 | 4.337326919  | 0.608611073   | -2.990189836 |
| Fe143 | 4.137975376  | 2.935642158   | -1.678724527 |
| Fe144 | 5.084326912  | -1.842211070  | -0.454464970 |
| Fe145 | 2.642485253  | -2.346270588  | -1.191762217 |
| H146  | -5.671137864 | -7.622249856  | -0.268108651 |
| H147  | -5.765857579 | -6.833963424  | -1.695599861 |



|      |              |              |               |
|------|--------------|--------------|---------------|
| H148 | -9.471606720 | -5.307378782 | -0.435243929  |
| H149 | -8.146695628 | -6.801823856 | -1.639343045  |
| H150 | -8.109124638 | -7.807998822 | -0.193461805  |
| H151 | -8.111061601 | -3.105864575 | 0.651464980   |
| H152 | -9.411569913 | -5.907122035 | 2.458408517   |
| H153 | -9.847911178 | -3.436907547 | 0.839595770   |
| H154 | -9.257346171 | -6.401158704 | 4.725838020   |
| H155 | -6.807104503 | -6.171437709 | 2.941485072   |
| H156 | -9.198859387 | -4.658819060 | 5.078151339   |
| H157 | -3.196807498 | -2.511350432 | 2.868255383   |
| H158 | -5.470185201 | -4.218268575 | 2.342459510   |
| H159 | -4.568815255 | -6.745919034 | 3.331811574   |
| H160 | -5.985583187 | -0.047212081 | 5.755695525   |
| H161 | -6.551951761 | -2.473046193 | 4.262599049   |
| H162 | -4.784369980 | -6.494105531 | 5.082161989   |
| H163 | -4.697804933 | -2.055773010 | 2.026710677   |
| H164 | -6.008726355 | -3.547556409 | 6.737638780   |
| H165 | -7.336654513 | -1.179590014 | 6.024661305   |
| H166 | -0.650202887 | -3.331356953 | 4.089336171   |
| H167 | -0.458490215 | -2.342945088 | 2.621846556   |
| H168 | 0.912101420  | -2.543323336 | 3.728756927   |
| H169 | -1.733913852 | -1.107839480 | 4.354842728   |
| H170 | -5.645819003 | -4.414717856 | 8.839601211   |
| H171 | -2.774362106 | 1.947052078  | 4.604318184   |
| H172 | -3.401236044 | 0.143749974  | 8.656096728   |
| H173 | -3.759945527 | 3.738121349  | 8.458107809   |
| H174 | -0.233798909 | 0.161473737  | 2.787602180   |
| H175 | 1.042957821  | 0.156370663  | 4.016387252   |
| H176 | 8.086680286  | 2.866298777  | 6.007415197   |
| H177 | -3.769970422 | 3.406884948  | 4.745688775   |
| H178 | -4.331408913 | 4.411839897  | 6.911742246   |
| H179 | -2.019048537 | 3.499608226  | 5.052674570   |
| H180 | -2.622688122 | 4.584932727  | 7.383206893   |
| H181 | -4.044781546 | 1.927259104  | 6.761743016   |
| H182 | -1.061791346 | 2.503075224  | 7.160909579   |
| H183 | -2.440005930 | 0.195092992  | 6.066337434   |
| H184 | -0.489787376 | 1.009896602  | 4.325801144   |
| H185 | 1.014033880  | 4.703410245  | 0.576150971   |
| H186 | -0.037201041 | 5.448927716  | 1.817595251   |
| H187 | 2.004799353  | 6.075060488  | 2.396877026   |
| H188 | 2.020452983  | 5.521204656  | 4.997600817   |
| H189 | 4.139014127  | 4.797568157  | 2.253712443   |
| H190 | 6.004331798  | 3.178080627  | 2.405034037   |
| H191 | 5.131086878  | 2.561041784  | 6.586223505   |
| H192 | -2.100855371 | -2.337126864 | 6.529997893   |
| H193 | -1.397759028 | -5.427997294 | 7.143167292   |
| H194 | -1.254919034 | -4.692630154 | 8.756261960   |
| H195 | -3.433030727 | -4.209453055 | 6.793979623   |
| H196 | -5.359557947 | -2.777430692 | 9.481134847   |
| H197 | 3.236365125  | 4.149296434  | 6.424061764   |
| H198 | 0.743100530  | -1.584047118 | 6.082480116   |
| H199 | -3.638988668 | 1.335349319  | 11.172239569  |
| H200 | -3.552448866 | -0.418837439 | 10.875496297  |
| H201 | -0.852109196 | 0.070675851  | 10.865907708  |
| H202 | 10.636872283 | -5.837330045 | 6.600152943   |
| H203 | -0.547343704 | -6.152571570 | -3.722927399  |
| H204 | 1.430789160  | -8.673441117 | 1.477734697   |
| H205 | -0.368893097 | -6.942234512 | -8.143764316  |
| H206 | 1.094201517  | -5.975122762 | -8.467450539  |
| H207 | -1.558798962 | -5.042377293 | -7.232508854  |
| H208 | -1.430404563 | 0.174479047  | -10.195543788 |
| H209 | -1.314778147 | -5.118235001 | -9.752946519  |

|      |               |              |               |
|------|---------------|--------------|---------------|
| H210 | -2.831049369  | -2.454389735 | -2.690001843  |
| H211 | -3.344232431  | -5.125881529 | -1.272722531  |
| H212 | -0.684376140  | -1.753581262 | -8.603286365  |
| H213 | -3.495693079  | -1.248912237 | -9.369323994  |
| H214 | 0.804680658   | -3.099765120 | -9.374710510  |
| H215 | -0.413567572  | -5.731350198 | -2.019846813  |
| H216 | -0.110265155  | -4.037934187 | -7.158078417  |
| H217 | 0.908817680   | -4.561027981 | -10.128464767 |
| H218 | -5.994762957  | -4.027325398 | -3.612434141  |
| H219 | -3.199804382  | -2.473870889 | -0.958323537  |
| H220 | 2.478840019   | -5.653315483 | -6.880673785  |
| H221 | -1.818662662  | -4.293747272 | -1.005355096  |
| H222 | -4.401170929  | 2.675522197  | 2.114923555   |
| H223 | -2.975970527  | 0.673693804  | 0.874919967   |
| H224 | -8.604887456  | 0.454685238  | 2.294088032   |
| H225 | -7.234249174  | -0.443473166 | -0.206290230  |
| H226 | -7.391640999  | 3.808425093  | 0.656282281   |
| H227 | -9.393745790  | 8.518874324  | 1.862939579   |
| H228 | -8.154092159  | 5.151592456  | 3.475504927   |
| H229 | -9.710925494  | 5.073839573  | 1.155027530   |
| H230 | -7.047302003  | 6.613350203  | 1.003897695   |
| H231 | -11.186511324 | 8.810352044  | -1.963931347  |
| H232 | -3.668247654  | 4.231256590  | 0.316529112   |
| H233 | -5.021178509  | 3.747860500  | -0.707848330  |
| H234 | -10.642508745 | 10.022266042 | 0.217839726   |
| H235 | -8.774339336  | 5.168849720  | -0.336981084  |
| H236 | -6.262967444  | 1.651558938  | 0.104653957   |
| H237 | -7.307256945  | -0.743744950 | 2.257069612   |
| H238 | -9.941674533  | 0.947241184  | -2.016861671  |
| H239 | -1.811382311  | 1.226844778  | -3.156119916  |
| H240 | -9.979238322  | -0.809022792 | -1.797911300  |
| H241 | 9.414009384   | 3.967985375  | 4.366381601   |
| H242 | 7.901299521   | 4.024903813  | 3.751505199   |
| H243 | 1.611565569   | 6.160016350  | -1.408085469  |
| H244 | -1.042821086  | 5.969880550  | -0.219465654  |
| H245 | 1.317117803   | 8.613683936  | -0.370603751  |
| H246 | -3.671611454  | 3.601702646  | -3.028500059  |
| H247 | -5.252020776  | 2.975277136  | -4.315707259  |
| H248 | -4.605757566  | 4.882080667  | -3.227916300  |
| H249 | -4.655267756  | 0.779289779  | -4.858390387  |
| H250 | -6.380958965  | 0.485356970  | -5.201761143  |
| H251 | -0.511842671  | 12.103683974 | -3.191247225  |
| H252 | -1.992668824  | 13.102399476 | -3.300657238  |
| H253 | -0.681706833  | 9.799563717  | -3.631785191  |
| H254 | -2.230512606  | 9.005336849  | -3.762664929  |
| H255 | -2.214786289  | 8.379833836  | -7.115189592  |
| H256 | -1.539939451  | 3.900857367  | -6.316948924  |
| H257 | -7.432142412  | 8.053664427  | -2.590252750  |
| H258 | -3.560134419  | 8.589433375  | 0.489822817   |
| H259 | -4.110584530  | 7.092916086  | -4.444860611  |
| H260 | 1.654498658   | 4.781898367  | -3.717413093  |
| H261 | 2.785898864   | 6.915103261  | -3.330366755  |
| H262 | -0.824151120  | 4.283649078  | -3.755382009  |
| H263 | -7.902752422  | -0.989264296 | -2.795415439  |
| H264 | 3.871226346   | 9.674460942  | -4.537527511  |
| H265 | -5.409091579  | -1.456765181 | -3.944855498  |
| H266 | 1.541167205   | 5.470632529  | -5.344333951  |
| H267 | -3.479246524  | 6.890345374  | -1.297995663  |
| H268 | 3.260456862   | 10.348810166 | -3.013712746  |
| H269 | -1.436681126  | 6.895361109  | -7.519984776  |
| H270 | -4.054057508  | 8.276989129  | -5.698108974  |
| H271 | -4.350449206  | -4.095125922 | -3.900046135  |

|      |              |               |              |
|------|--------------|---------------|--------------|
| H272 | -5.335646137 | -3.684390407  | -1.428502006 |
| H273 | -7.470520860 | 9.840810909   | -0.868207818 |
| H274 | -5.100590857 | 1.019901985   | -2.467041347 |
| H275 | 0.082757773  | 7.307251959   | -4.505184390 |
| H276 | -0.572704615 | 5.344010224   | -6.607023302 |
| H277 | 0.192315043  | 3.431118964   | -4.896780491 |
| H278 | -2.944776954 | 5.149792480   | -4.739006859 |
| H279 | 0.125905102  | 9.878551399   | 1.933116036  |
| H280 | -0.950727050 | 10.278104472  | -1.173158072 |
| H281 | -0.988755882 | 13.205706034  | -1.057439870 |
| H282 | 1.591087735  | 10.357692617  | 1.050123198  |
| H283 | -3.110479049 | 10.871460949  | 0.134228272  |
| H284 | 6.298878411  | -3.182072911  | -7.974380157 |
| H285 | 6.239806991  | -4.592708974  | -6.896912188 |
| H286 | 8.871352708  | -4.829163209  | -3.049433478 |
| H287 | 7.083239639  | -5.303725676  | -9.005439157 |
| H288 | 5.536777885  | -5.846252593  | -8.962204145 |
| H289 | 5.484416733  | 5.420626826   | -0.145087402 |
| H290 | 5.111250816  | 8.270190625   | 0.962959939  |
| H291 | 5.121491991  | 8.109504404   | -3.351761323 |
| H292 | 3.910582824  | 6.194963210   | 0.205754872  |
| H293 | 6.380765805  | 8.864831662   | 0.123108468  |
| H294 | 5.936524504  | 2.990720813   | -5.712112071 |
| H295 | 6.135470114  | 7.278280144   | -1.599429881 |
| H296 | 4.685381627  | -5.896810208  | 6.238845301  |
| H297 | 6.947337780  | -7.004643486  | 4.491825858  |
| H298 | 4.602623138  | 1.170079360   | -6.265223577 |
| H299 | 4.341757425  | 0.781616569   | 3.967604905  |
| H300 | 2.005381399  | 0.975190574   | -8.634531891 |
| H301 | -0.245806923 | -2.796466818  | -4.356107883 |
| H302 | 1.382818350  | 1.567424256   | -7.097990440 |
| H303 | 3.651994435  | -3.634979101  | 5.158414889  |
| H304 | 3.184037335  | -0.208281986  | -6.127359036 |
| H305 | 3.904604544  | -4.291882431  | 3.540812693  |
| H306 | 4.591240379  | -6.402168378  | 4.537116736  |
| H307 | 6.337729278  | -4.566467858  | 4.002517856  |
| H308 | 6.111799043  | -3.967645520  | 5.657399949  |
| H309 | -3.927665830 | -1.581006609  | -7.094429245 |
| H310 | 5.491534389  | -8.266440593  | 6.789205872  |
| H311 | 4.968796586  | -10.980492706 | 5.418638775  |
| H312 | 1.062987751  | -0.682621704  | -4.059023861 |
| H313 | 5.907926255  | -10.387662037 | 8.114497063  |
| H314 | 4.442190159  | -10.918761009 | 7.610178041  |
| H315 | 5.195206233  | -2.403562654  | 2.916561958  |
| H316 | 0.244530296  | 1.416197561   | -5.007892338 |
| H317 | -2.288197613 | -2.788622204  | -5.773140089 |
| H318 | 8.353833635  | -9.324672884  | 0.789556567  |
| H319 | 7.790729111  | -7.520903260  | -2.062101201 |
| H320 | 6.922141843  | -7.643796957  | 1.797879824  |
| H321 | 7.846353269  | -10.193144273 | -0.383407438 |
| H322 | 6.479675771  | 2.181102714   | -8.507200330 |
| H323 | 6.692068944  | -4.598168613  | 1.145035225  |
| H324 | 2.752005472  | -7.047589424  | 1.907693386  |
| H325 | 4.647103962  | -2.224487500  | -6.701305869 |
| H326 | 3.695468476  | -8.915789720  | 0.440237653  |
| H327 | 4.923349524  | -7.137978963  | -6.000877341 |
| H328 | 3.637360813  | -5.573205415  | -4.455110194 |
| H329 | 6.568256697  | -11.337327726 | 6.081245342  |
| H330 | 5.025172836  | -0.199625890  | 2.662888608  |
| H331 | 8.491646814  | -5.073145380  | 2.667072489  |
| H332 | 7.306558763  | -3.180154698  | 1.316761648  |
| H333 | 8.751790630  | -5.831428236  | 4.928021288  |

|       |              |               |              |
|-------|--------------|---------------|--------------|
| H334  | 3.778032439  | -1.892617505  | 6.182186158  |
| H335  | 4.158319429  | -11.755467225 | -2.167496042 |
| H336  | 4.547358055  | -8.240539947  | -2.425674065 |
| H337  | 5.692779771  | -8.248718319  | -1.072194285 |
| H338  | 2.639217649  | -8.608719062  | -0.967045675 |
| H339  | 2.497235338  | -2.428181949  | -5.633591940 |
| H340  | -1.799906467 | 1.438747407   | -6.474286260 |
| H341  | -3.846810411 | 0.185780260   | -7.307021299 |
| H342  | 2.412561509  | -5.476924926  | 1.114978464  |
| H343  | 8.667063851  | -6.614212671  | 2.733161695  |
| H344  | 7.558787473  | -8.572771932  | 2.871196456  |
| H345  | 3.476917979  | -0.234461658  | 5.875299474  |
| H346  | 7.243854405  | -7.718910793  | -5.060820122 |
| H347  | 7.290644057  | -5.948353988  | -1.432367061 |
| H348  | 1.932240176  | -3.390159482  | -7.035672335 |
| H349  | 5.000167102  | 4.035177079   | -6.798746187 |
| H350  | 6.647041286  | 0.995364027   | 5.327622046  |
| H351  | 7.011377429  | 1.288734888   | 3.612779076  |
| H352  | 10.476950078 | -6.136487178  | -4.146923593 |
| H353  | 9.884543237  | -7.545211780  | -3.561711593 |
| H354  | 10.989629673 | -7.865659860  | 0.854184656  |
| H355  | 9.409925243  | -7.671355755  | -0.785844498 |
| H356  | 12.633243457 | -6.817369917  | -1.070681800 |
| H357  | 10.652148666 | -6.156228581  | 1.199645320  |
| H358  | 9.704886837  | 1.015340673   | 4.145611213  |
| H359  | -4.250282048 | 13.274100155  | 1.882908306  |
| H360  | 9.402238692  | -5.548787948  | 7.856859466  |
| H361  | 8.956459029  | -3.263402254  | 6.405790569  |
| H362  | -5.631715791 | 12.106185273  | -0.535388829 |
| H363  | -4.886288376 | 10.238409357  | 1.801163080  |
| H364  | -6.531380950 | 10.675698787  | 1.311260104  |
| H365  | 1.569634482  | -3.305867138  | -0.725440269 |
| H366  | -6.242296571 | 6.335948183   | -3.484882242 |
| H367  | 0.217719224  | -1.306980947  | -0.290142994 |
| H368  | -1.578356733 | -0.208681819  | -1.100627775 |
| Mo369 | 4.468963078  | -4.277834128  | -1.491085526 |
| N370  | 2.207662829  | -0.664164612  | 1.926506300  |
| N371  | 2.281687843  | -0.178797489  | 0.916277417  |
| N372  | -6.248086085 | -7.518321877  | -1.107369131 |
| N373  | -8.735554642 | -5.085712028  | 0.230726551  |
| N374  | -8.992444560 | -5.193868030  | 3.050413751  |
| N375  | -6.454176514 | -6.054075039  | 3.892061231  |
| N376  | -4.793372392 | -3.880347942  | 3.027743743  |
| N377  | -5.866314485 | -1.869607870  | 4.722464409  |
| N378  | -5.546386558 | -2.918730560  | 7.400075225  |
| N379  | -2.934367242 | -4.103765852  | 7.683188015  |
| N380  | -1.085284795 | -2.378710693  | 6.579299827  |
| N381  | -1.719611800 | 0.585492658   | 6.676747119  |
| N382  | -2.840217493 | 0.712025339   | 9.293603385  |
| N383  | 5.199469297  | -10.271375837 | 7.386972280  |
| N384  | 6.009695898  | -8.183232805  | 5.907856401  |
| N385  | 4.751408935  | -2.421377240  | 3.839442561  |
| N386  | 3.676366119  | -1.154075172  | 5.493973963  |
| N387  | 4.565452379  | -0.137449565  | 3.597946073  |
| N388  | 8.616649092  | -5.837084755  | 5.963073365  |
| N389  | -5.124816791 | -3.492284229  | -3.570663823 |
| N390  | -0.936521270 | -5.691101414  | -2.895841950 |
| N391  | -5.596030887 | -0.917311009  | -3.087045969 |
| N392  | -8.140195087 | -0.074710376  | -2.420055206 |
| N393  | -7.974715610 | -0.044712565  | 0.387359587  |
| N394  | -6.045693023 | 1.918908733   | 1.064813966  |
| N395  | -3.073680375 | 2.469088509   | -1.916918858 |

|      |               |              |              |
|------|---------------|--------------|--------------|
| N396 | -2.199687604  | 0.600896536  | -1.137591681 |
| N397 | -6.987946374  | 4.517670192  | 1.264109219  |
| N398 | -10.206192469 | 7.122724756  | -1.050006225 |
| N399 | -10.402192567 | 9.053003956  | 0.027750010  |
| N400 | 8.666371310   | 3.384900009  | 3.982223243  |
| N401 | 5.887128394   | 7.996607685  | 0.350390516  |
| N402 | 4.389553073   | 8.592560178  | -2.837607332 |
| N403 | 1.976267289   | 7.446049331  | -3.690289141 |
| N404 | -2.305689936  | 5.609380193  | -5.424398739 |
| N405 | -1.934765915  | 7.447182927  | -6.829856469 |
| N406 | -3.568424158  | 7.544608967  | -5.186611425 |
| N407 | 0.631327013   | 6.478205388  | -1.350209993 |
| N408 | 0.458951643   | 8.866586444  | 0.129618317  |
| N409 | -0.984760685  | 11.172303475 | -0.679700447 |
| N410 | -1.701686447  | 9.841745590  | -3.517548118 |
| N411 | -3.622335496  | 11.725940722 | -0.070783590 |
| N412 | 6.107890962   | -4.998410304 | -9.027225342 |
| N413 | 3.941654373   | -2.869853825 | -7.079179203 |
| N414 | 2.612615191   | -0.145858902 | -6.996761921 |
| N415 | 4.488805295   | 2.004608501  | -6.856767411 |
| N416 | 0.272131697   | -3.788849802 | -9.920787529 |
| N417 | -1.660690981  | -1.974371018 | -8.827975035 |
| N418 | 9.610778073   | -6.605591533 | -3.866427238 |
| N419 | 5.391208172   | -5.677568476 | -3.214940122 |
| N420 | 5.295409500   | -6.775682847 | -5.127574982 |
| N421 | 10.054231278  | -6.883655702 | -0.713278442 |
| N422 | 0.084506062   | 2.526029327  | -0.116502325 |
| N423 | 0.937618874   | 1.824931511  | -0.326172038 |
| O424 | -6.594576059  | -5.478996454 | 0.893882289  |
| O425 | -8.117849318  | -3.093897532 | 3.165779940  |
| O426 | -6.896670910  | -5.224676456 | 5.977721835  |
| O427 | -3.468947094  | -4.366584903 | 4.814225999  |
| O428 | -3.860419541  | -0.806505003 | 4.602108368  |
| O429 | -5.103695797  | -0.760619905 | 8.006136937  |
| O430 | -3.090367764  | -3.747097970 | 9.944416881  |
| O431 | 0.680670726   | -3.698417368 | 7.235650899  |
| O432 | 0.448289605   | 0.494350449  | 7.384049075  |
| O433 | -1.503871999  | 2.518733846  | 9.617609700  |
| O434 | -1.602592243  | 0.701360937  | 12.657912600 |
| O435 | 7.007294860   | -9.518285056 | 4.303469500  |
| O436 | 7.213318804   | -6.356708868 | 7.708465757  |
| O437 | 10.922681490  | -3.268740255 | 6.946310821  |
| O438 | -5.576113522  | -1.187360940 | -0.806132919 |
| O439 | -2.734402254  | -4.974814902 | -4.090245342 |
| O440 | -7.367605386  | 2.022223390  | -1.962386052 |
| O441 | -5.963811042  | 2.412536908  | -4.723783917 |
| O442 | -10.125870655 | 0.749555211  | 0.519773448  |
| O443 | -6.433438377  | 1.578624435  | 3.288741873  |
| O444 | -5.199452102  | 5.078673861  | 2.568498794  |
| O445 | -7.991004861  | 7.182605551  | 3.373249446  |
| O446 | 9.504708460   | 0.734142769  | 6.156892879  |
| O447 | 2.540725146   | 5.474899397  | 4.174494629  |
| O448 | 3.341960672   | 8.858287761  | -0.831674214 |
| O449 | 1.116284381   | 9.532298854  | -4.133043693 |
| O450 | -1.309442179  | 6.850182357  | -2.502628354 |
| O451 | -1.311397221  | 8.005395336  | 1.301156216  |
| O452 | 1.792313045   | 6.418057110  | 1.504761039  |
| O453 | -0.050383123  | 12.399021589 | 1.014425278  |
| O454 | -3.561215724  | 13.730567577 | -1.156821743 |
| O455 | -3.623090137  | 11.077847273 | -3.476823793 |
| O456 | -6.267702442  | 13.463898255 | 1.622430160  |
| O457 | -5.369119057  | 6.404150690  | -3.051625752 |

|                   |                                    |              |               |              |              |
|-------------------|------------------------------------|--------------|---------------|--------------|--------------|
|                   | O458                               | 3.563974379  | -4.969095267  | -7.940283832 |              |
|                   | O459                               | 1.263520405  | -1.352328978  | -8.399262807 |              |
|                   | O460                               | 3.116550641  | 3.289542586   | -8.156839667 |              |
|                   | O461                               | 7.542090448  | 3.757817785   | -7.751508395 |              |
|                   | O462                               | -3.200509196 | -3.586166603  | -9.315610321 |              |
|                   | O463                               | 0.048351050  | -6.993235785  | -5.541643066 |              |
|                   | O464                               | 2.012569916  | -6.102228769  | -6.107068676 |              |
|                   | O465                               | -2.512372655 | 1.473342612   | -9.058687458 |              |
|                   | O466                               | 10.765272786 | -4.844491955  | -1.396014907 |              |
|                   | O467                               | 13.234934395 | -6.067842968  | 0.729148608  |              |
|                   | O468                               | 0.276465689  | -6.379452929  | -0.116339197 |              |
|                   | O469                               | 0.708689266  | -8.283314219  | 0.948935253  |              |
|                   | O470                               | 6.021415922  | -10.750030193 | -1.300327693 |              |
|                   | O471                               | 3.914050863  | -10.806728407 | -2.112722969 |              |
|                   | O472                               | 5.616433046  | -5.553491858  | 0.002268513  |              |
|                   | O473                               | 5.313695434  | -7.169474967  | 1.543874429  |              |
|                   | O474                               | 3.351837752  | -6.040989281  | -1.238468682 |              |
|                   | O475                               | 9.010034032  | -5.773469750  | 3.137985136  |              |
|                   | O476                               | 7.240378415  | -4.048563417  | 1.762096035  |              |
|                   | O477                               | -4.127730369 | 4.187018979   | -3.729992245 |              |
|                   | O478                               | 8.672357910  | -9.933882605  | 0.075320858  |              |
|                   | O479                               | 7.798812465  | -8.052940924  | 2.061690540  |              |
|                   | S480                               | 3.933228319  | 5.242854649   | -2.033674172 |              |
|                   | S481                               | 2.408076124  | 1.841623786   | -2.852310253 |              |
|                   | S482                               | 2.885974583  | -3.456559951  | -3.079827874 |              |
|                   | S483                               | 3.821012678  | 2.189675306   | 0.405042016  |              |
|                   | S484                               | 0.840804055  | -0.979595743  | -1.459188266 |              |
|                   | S485                               | 4.895617273  | -0.685380369  | -4.760350608 |              |
|                   | S486                               | 3.656341816  | -3.265704908  | 0.521747661  |              |
|                   | S487                               | 6.109709514  | 1.878447752   | -2.260598119 |              |
|                   | S488                               | 6.334672944  | -2.879740360  | -1.986865737 |              |
|                   | S489                               | 6.320080330  | -0.568650308  | 0.879903284  |              |
| <b>6, 47(1/2)</b> | <b>bm22b2n2x6x2n2nd471te.car_5</b> |              |               |              |              |
| Fe1               | 1.44                               | C1           | -7.243958588  | 3.353695810  | 5.168846192  |
| Fe2               | -0.01                              | C2           | -7.294402030  | 3.025203179  | 6.663720091  |
| Fe3               | 2.82                               | C3           | -8.505255584  | 3.513004063  | 3.067710263  |
| Fe4               | -2.51                              | C4           | -8.077448544  | 4.909088576  | 2.620254026  |
| Fe5               | 2.38                               | C5           | -7.938792550  | 7.289379399  | 3.157309876  |
| Fe6               | -1.15                              | C6           | -6.421081890  | 7.489956182  | 3.107443913  |
| Fe7               | -2.27                              | C7           | -4.234438161  | 6.749318867  | 3.922314167  |
|                   |                                    | C8           | -3.646172698  | 6.045411738  | 2.695038965  |
|                   |                                    | C9           | -3.802507454  | 4.186060633  | 1.124842319  |
|                   |                                    | C10          | -4.054391109  | 4.979151575  | -0.167866978 |
|                   |                                    | C11          | -5.450675389  | 6.551496310  | -1.380545024 |
|                   |                                    | C12          | -4.598248252  | 7.827088312  | -1.452848220 |
|                   |                                    | C13          | -3.910639647  | 9.883719791  | -0.313059833 |
|                   |                                    | C14          | -2.397533666  | 9.967048901  | -0.077824331 |
|                   |                                    | C15          | -0.439815172  | 9.001749904  | 1.058994429  |
|                   |                                    | C16          | 0.457429288   | 7.971000347  | 0.364473636  |
|                   |                                    | C17          | 0.462488532   | 5.991189317  | -1.147153781 |
|                   |                                    | C18          | 0.330479365   | 6.202965463  | -2.666300640 |
|                   |                                    | C19          | -0.052249330  | 4.608991820  | -0.677937248 |
|                   |                                    | C20          | 0.393567042   | 3.497861164  | -1.634431732 |
|                   |                                    | C21          | 0.378314116   | 4.334074750  | 0.767382665  |
|                   |                                    | C22          | -1.135696555  | 6.154956002  | -4.635873833 |
|                   |                                    | C23          | -1.079349579  | 7.612603716  | -5.124104031 |
|                   |                                    | C24          | -2.441164634  | 5.430854786  | -5.045732791 |
|                   |                                    | C25          | -2.732407381  | 5.618189901  | -6.538659879 |
|                   |                                    | C26          | -2.368506207  | 3.936277974  | -4.702182426 |
|                   |                                    | C27          | -1.761031958  | 9.913715301  | -4.794319604 |
|                   |                                    | C28          | -0.366572027  | 10.485240722 | -4.964363272 |

|     |               |              |               |
|-----|---------------|--------------|---------------|
| C29 | 6.854454454   | 9.025902038  | 7.337409715   |
| C30 | 7.281192055   | 7.813300307  | 6.510484731   |
| C31 | 7.308560594   | 6.920009634  | 4.180078505   |
| C32 | 8.400322651   | 7.519114971  | 3.271623867   |
| C33 | 6.049979829   | 6.533847398  | 3.385168527   |
| C34 | 6.318330381   | 5.511819848  | 2.279826682   |
| C35 | 5.017048601   | 4.924061769  | 1.734903749   |
| C36 | 4.856514055   | 3.893911663  | -0.543493757  |
| C37 | 10.608560741  | 7.157270628  | 2.273569560   |
| C38 | 10.737365374  | 6.443655061  | 0.945580589   |
| C39 | -4.908512055  | -0.171612587 | 3.643663321   |
| C40 | -5.474526148  | -0.508522528 | 2.254428119   |
| C41 | -3.367601258  | -0.107381496 | 3.510012680   |
| C42 | -2.602640555  | 0.512696423  | 4.697577842   |
| C43 | -2.195438137  | -0.476490305 | 5.789145886   |
| C44 | -6.306598435  | -2.351669729 | 0.860915745   |
| C45 | -7.663525327  | -1.892645406 | 0.311933475   |
| C46 | -6.211640502  | -3.890502110 | 0.859999685   |
| C47 | -9.518323400  | -0.310681653 | 0.537713049   |
| C48 | -9.140749605  | 0.919263887  | -0.298486857  |
| C49 | -7.383085273  | 2.501972165  | -0.962384905  |
| C50 | -6.397348521  | 2.244864201  | -2.101825857  |
| C51 | -4.970456480  | 0.649737759  | -3.306503474  |
| C52 | -5.629746765  | 0.636392031  | -4.710841642  |
| C53 | -4.360840532  | -0.748025718 | -3.128148297  |
| C54 | -3.569169664  | -1.013413779 | -1.886920114  |
| C55 | -2.873493106  | -0.223092364 | -1.004374615  |
| C56 | -2.536565253  | -2.341520178 | -0.419045332  |
| C57 | -7.659591915  | -0.073328063 | -5.939749549  |
| C58 | -7.792347939  | 1.198522778  | -6.774828157  |
| C59 | -9.050458545  | -0.613354525 | -5.531350288  |
| C60 | -9.775879201  | -1.421531151 | -6.566700055  |
| C61 | -9.885322389  | -1.253700191 | -7.934202980  |
| C62 | -11.016940603 | -3.044282425 | -7.282278149  |
| C63 | 8.610105159   | 2.661309453  | -4.134072378  |
| C64 | 9.671871975   | 3.088535319  | -3.136311785  |
| C65 | 7.259519724   | 2.688718163  | -3.383746759  |
| C66 | 6.076979041   | 2.353938648  | -4.262581167  |
| C67 | 5.398308993   | 3.349899646  | -4.988971928  |
| C68 | 5.610645611   | 1.031291312  | -4.364661789  |
| C69 | 4.290148184   | 3.038997823  | -5.784213746  |
| C70 | 4.513113714   | 0.704183142  | -5.160577514  |
| C71 | 3.852358612   | 1.711247155  | -5.868757711  |
| C72 | 4.875949957   | -4.363467284 | -6.419312897  |
| C73 | 3.713582258   | -5.167992231 | -7.018146061  |
| C74 | 4.362285032   | -3.417283482 | -5.322291647  |
| C75 | 2.627984038   | -7.365665571 | -7.184490370  |
| C76 | 1.261316670   | -7.187358661 | -6.522414315  |
| C77 | -0.003621006  | -6.209401215 | -4.641217205  |
| C78 | -0.634388623  | -4.877851193 | -5.104905476  |
| C79 | 0.260049253   | -6.257039192 | -3.124517355  |
| C80 | -0.933338851  | -6.019386242 | -2.193054050  |
| C81 | -1.993384137  | -7.132694796 | -2.109842899  |
| C82 | -3.527944256  | -7.756031583 | -3.988299775  |
| C83 | -0.328931598  | -2.589371086 | -5.888209583  |
| C84 | -0.632724417  | -2.582382949 | -7.399147010  |
| C85 | 0.572691221   | -1.387525951 | -5.576187077  |
| C86 | 0.238887598   | -3.169403587 | -9.608286854  |
| C87 | -0.585141013  | -4.043309160 | -10.549996568 |
| C88 | -2.202082724  | -5.882582775 | -10.790011461 |
| C89 | -3.567099183  | -5.386896817 | -11.310765630 |
| C90 | -2.358474775  | -7.230243186 | -10.050352826 |

|       |              |              |               |
|-------|--------------|--------------|---------------|
| C91   | -3.184471750 | -7.087583134 | -8.777427901  |
| C92   | -5.372578434 | -3.741060200 | -11.061433126 |
| C93   | -5.469519512 | -3.246896809 | -12.500387974 |
| C94   | -5.740813465 | -2.594662224 | -10.081691024 |
| C95   | -5.824143466 | -3.068153163 | -8.648960220  |
| C96   | -7.001241476 | -3.663447419 | -8.168574568  |
| C97   | -4.723561254 | -2.979120727 | -7.780979888  |
| C98   | -7.076962510 | -4.178834138 | -6.872483481  |
| C99   | -4.772797166 | -3.510286445 | -6.487113639  |
| C100  | -5.951077556 | -4.112711922 | -6.051730008  |
| C101  | 5.073048398  | -6.201218314 | 6.999406001   |
| C102  | 3.608659639  | -5.871591971 | 6.765681342   |
| C103  | 1.890150130  | -5.413615184 | 5.034615217   |
| C104  | 1.262041207  | -6.503912455 | 4.159550644   |
| C105  | 1.342140121  | -7.615886389 | 1.978964039   |
| C106  | 2.360472300  | -8.151934123 | 0.976826214   |
| C107  | 4.553320510  | -7.980894878 | -0.093724366  |
| C108  | 5.525879910  | -9.025844294 | 0.418893987   |
| C109  | -1.736095598 | -6.536466013 | 7.571355123   |
| C110  | -2.897889492 | -6.763530269 | 6.594857171   |
| C111  | -1.274583538 | -5.063637378 | 7.490422459   |
| C112  | -0.384172632 | -4.688232996 | 8.689130100   |
| C113  | 0.270746454  | -3.344024746 | 8.464683044   |
| C114  | -3.595044155 | -7.214751148 | 4.293985388   |
| C115  | -3.228933629 | -8.366090508 | 3.376909136   |
| C116  | -4.028595217 | -5.917067648 | 3.564891421   |
| C117  | -2.836833590 | -5.133070318 | 3.081580309   |
| C118  | -2.185468049 | -5.465080485 | 1.880153479   |
| C119  | -2.268138840 | -4.146900549 | 3.906822185   |
| C120  | -0.957022556 | -4.876014536 | 1.558192539   |
| C121  | -1.041724008 | -3.558387049 | 3.582469534   |
| C122  | -0.367674229 | -3.949337051 | 2.422304716   |
| C123  | 8.887133624  | -1.248609490 | 6.546563584   |
| C124  | 9.989336714  | -0.309129203 | 6.030529904   |
| C125  | 7.601389668  | -0.492021436 | 6.916962299   |
| C126  | 6.411929622  | -1.341845807 | 7.247601119   |
| C127  | 6.246728844  | -2.166342869 | 8.343006751   |
| C128  | 4.359961022  | -2.089370125 | 7.184463156   |
| C129  | 11.233526715 | 1.768755962  | 6.231306337   |
| C130  | 12.576709781 | 1.082990218  | 6.110612791   |
| C131  | 1.422600595  | 3.164956834  | 6.235652211   |
| C132  | 2.812181238  | 3.191369007  | 5.666122200   |
| C133  | 3.795369309  | 2.154631668  | 6.346535114   |
| C134  | 3.843723273  | 2.410853297  | 7.880085038   |
| C135  | 4.908808261  | 1.552705085  | 8.583715622   |
| C136  | 5.173730910  | 1.963162687  | 10.005053533  |
| C137  | 5.217988646  | 2.474317981  | 5.787447117   |
| C138  | 3.797318423  | -1.588855289 | 1.172724212   |
| Fe139 | 4.212843051  | -2.441909877 | 2.963963986   |
| Fe140 | 2.196039784  | -1.249258989 | -0.324933617  |
| Fe141 | 5.064126904  | -1.442720115 | -0.355320168  |
| Fe142 | 3.976873378  | -3.504861682 | 0.683313094   |
| Fe143 | 3.829534896  | -3.472606188 | -1.929512006  |
| Fe144 | 5.096510945  | -0.286833295 | 1.917828368   |
| Fe145 | 2.585200945  | -0.466533188 | 2.614835610   |
| H146  | -5.350258212 | 3.485106462  | 7.076657824   |
| H147  | -5.617191559 | 1.882054421  | 6.915748250   |
| H148  | -9.248442656 | 2.923680433  | 4.985375848   |
| H149  | -7.983601256 | 2.182471834  | 6.828079482   |
| H150  | -7.757800069 | 3.898079383  | 7.156498997   |
| H151  | -7.861189039 | 2.804224405  | 2.527888208   |
| H152  | -8.810323322 | 5.728752625  | 4.354204324   |



|      |              |              |              |
|------|--------------|--------------|--------------|
| H153 | -9.543215422 | 3.346736636  | 2.748383276  |
| H154 | -8.359572722 | 7.959711925  | 3.918407949  |
| H155 | -6.147963422 | 5.975600251  | 4.468295386  |
| H156 | -8.333950356 | 7.594011737  | 2.179326301  |
| H157 | -2.722474961 | 3.990174371  | 1.160040478  |
| H158 | -4.974634364 | 4.474557534  | 2.908108413  |
| H159 | -3.855091156 | 6.271484352  | 4.836169508  |
| H160 | -5.253973076 | 5.975150942  | -2.292692463 |
| H161 | -5.877777481 | 5.664165466  | 0.535819587  |
| H162 | -3.878296422 | 7.785824339  | 3.900525905  |
| H163 | -4.325242224 | 3.219622416  | 1.076438555  |
| H164 | -5.035631534 | 8.272248393  | 0.521923940  |
| H165 | -6.511324875 | 6.838573517  | -1.368231078 |
| H166 | 0.025068798  | 5.123357870  | 1.447033717  |
| H167 | -0.040634881 | 3.375770486  | 1.112110610  |
| H168 | 1.473056485  | 4.262474582  | 0.851289126  |
| H169 | -1.152634737 | 4.645642581  | -0.700396283 |
| H170 | -4.398855681 | 10.483759955 | 0.468730194  |
| H171 | -2.245237196 | 3.755220367  | -3.625553211 |
| H172 | -2.339630306 | 8.244374343  | -3.594343493 |
| H173 | -2.889231149 | 6.673471339  | -6.804439818 |
| H174 | 0.069450629  | 2.520837424  | -1.248392638 |
| H175 | 1.486578977  | 3.464939116  | -1.734329797 |
| H176 | 8.574160795  | 3.433525581  | -4.927713454 |
| H177 | -3.296562653 | 3.436175566  | -5.016995247 |
| H178 | -3.637716648 | 5.058558622  | -6.814304069 |
| H179 | -1.528753819 | 3.458190354  | -5.232866003 |
| H180 | -1.897518675 | 5.238322671  | -7.148836396 |
| H181 | -3.269207774 | 5.883799194  | -4.470773351 |
| H182 | -0.285167425 | 5.663044414  | -5.132958751 |
| H183 | -1.695623461 | 5.760903680  | -2.598201103 |
| H184 | -0.040134319 | 3.623161889  | -2.636321942 |
| H185 | 0.904221446  | -1.458285634 | -4.528295707 |
| H186 | -0.046390223 | -0.482912533 | -5.688039613 |
| H187 | 2.016334473  | -0.434691841 | -6.497932069 |
| H188 | 2.363748752  | 2.126598747  | -7.046970531 |
| H189 | 4.149803629  | -0.322156670 | -5.204193495 |
| H190 | 6.089568901  | 0.243971751  | -3.777996562 |
| H191 | 5.729098464  | 4.389716779  | -4.926042338 |
| H192 | -1.202977086 | 7.155848818  | -0.476719644 |
| H193 | -0.344632075 | 8.831673226  | 2.141646440  |
| H194 | -0.032322018 | 9.996716766  | 0.835970434  |
| H195 | -2.438209127 | 8.278690757  | 1.132867432  |
| H196 | -4.096095454 | 10.367372639 | -1.280680505 |
| H197 | 3.764588539  | 3.827257882  | -6.329996913 |
| H198 | 1.535438746  | 6.080325720  | -0.932494266 |
| H199 | -2.320661574 | 10.064005759 | -5.732131188 |
| H200 | -2.255515211 | 10.502736733 | -4.005499643 |
| H201 | 0.423539031  | 9.986263640  | -4.355843929 |
| H202 | 11.546973754 | 7.053463584  | 2.838315494  |
| H203 | -0.701092099 | -0.877714377 | 7.131378355  |
| H204 | 1.945204544  | 4.628014418  | 7.380298302  |
| H205 | -1.006154485 | -4.622561056 | 9.593626181  |
| H206 | 0.380661045  | -5.461342771 | 8.850154229  |
| H207 | -2.147550373 | -4.392678195 | 7.471520881  |
| H208 | -2.595338104 | -9.148063028 | 3.857388744  |
| H209 | -2.196962815 | -6.684773371 | 8.560433051  |
| H210 | -2.990345165 | -1.124612698 | 3.316571738  |
| H211 | -3.213538834 | 1.295924692  | 5.179027547  |
| H212 | -1.579867297 | -7.042952865 | 5.015012885  |
| H213 | -4.479533326 | -7.585470106 | 4.850440056  |
| H214 | -0.124609699 | -7.395319981 | 6.585782047  |

|      |               |              |               |
|------|---------------|--------------|---------------|
| H215 | -0.389998927  | 0.511764463  | 6.095600472   |
| H216 | -0.739007747  | -4.908818363 | 6.541213318   |
| H217 | -0.068165814  | -7.536859218 | 8.227665108   |
| H218 | -6.148137206  | -0.834055712 | 5.158072627   |
| H219 | -3.148768492  | 0.496632916  | 2.617533875   |
| H220 | 1.910645398   | -4.294355838 | 7.934226508   |
| H221 | -1.704282206  | 1.020035314  | 4.317911294   |
| H222 | -4.186698948  | 1.420272756  | -3.339851298  |
| H223 | -2.763993665  | 0.853326928  | -0.944383476  |
| H224 | -8.263376290  | 2.981774086  | -1.410280848  |
| H225 | -7.181226339  | 0.881491478  | 0.415407994   |
| H226 | -7.396429010  | 0.113104759  | -3.821963050  |
| H227 | -9.467474507  | -0.521490297 | -8.615843890  |
| H228 | -7.897941674  | 2.130100583  | -6.167223022  |
| H229 | -9.673982832  | 0.226445410  | -5.175780757  |
| H230 | -7.120521418  | -0.827152503 | -6.535514737  |
| H231 | -11.640641773 | -3.931958079 | -7.351084556  |
| H232 | -3.706248796  | -0.921794862 | -3.997548168  |
| H233 | -5.170531101  | -1.493360657 | -3.194489974  |
| H234 | -10.946102403 | -2.475564890 | -9.333601456  |
| H235 | -8.903805696  | -1.277699926 | -4.665325720  |
| H236 | -6.131028658  | 0.280278234  | -1.527968933  |
| H237 | -6.928705651  | 3.237629133  | -0.282138005  |
| H238 | -10.119745159 | -0.964736034 | -0.105711045  |
| H239 | -2.168851711  | -3.215412547 | 0.113360288   |
| H240 | -10.154934340 | 0.021451677  | 1.368610472   |
| H241 | 9.682131055   | 1.361795332  | -5.296545646  |
| H242 | 8.112683438   | 0.941127999  | -5.124959571  |
| H243 | 1.202824006   | -3.907103299 | -5.099883370  |
| H244 | -1.293654966  | -2.423691923 | -5.387820540  |
| H245 | 0.926556392   | -3.871608234 | -7.740527838  |
| H246 | -3.761758637  | -3.179272636 | -1.950157891  |
| H247 | -5.275900607  | -4.606064013 | -1.762966680  |
| H248 | -5.146740967  | -4.393798338 | -3.336078812  |
| H249 | -5.204108932  | -4.190303459 | 1.179308360   |
| H250 | -6.946082645  | -4.316860512 | 1.563246995   |
| H251 | -1.354468148  | -7.627806273 | -9.841301793  |
| H252 | -2.878769885  | -7.922282542 | -10.724691336 |
| H253 | -1.470007140  | -7.118654045 | -7.547875767  |
| H254 | -2.987759105  | -6.725882400 | -6.778840953  |
| H255 | -3.316143881  | -9.574861619 | -4.907837995  |
| H256 | -2.406288398  | -7.178418469 | -1.091302336  |
| H257 | -8.003902325  | -4.633502448 | -6.512620063  |
| H258 | -3.798643264  | -2.488895768 | -8.099390323  |
| H259 | -4.849658361  | -6.402382279 | -4.810999568  |
| H260 | 1.027483076   | -5.506566313 | -2.877255988  |
| H261 | 2.099284497   | -6.070718949 | -5.005297097  |
| H262 | -1.422882492  | -5.060311611 | -2.423930941  |
| H263 | -8.039446245  | -0.833844969 | 2.003776413   |
| H264 | 2.938898925   | -8.409292110 | -7.038947941  |
| H265 | -5.890911783  | -2.308199295 | 3.026792223   |
| H266 | 0.701221539   | -7.243423077 | -2.903009849  |
| H267 | -3.887756562  | -3.488921840 | -5.847487755  |
| H268 | -7.151731181  | -3.854656666 | -0.847425385  |
| H269 | 2.471740720   | -7.207037860 | -8.260312558  |
| H270 | -2.535278486  | -9.452054719 | -3.367778999  |
| H271 | -4.994470011  | -8.022669747 | -5.385383037  |
| H272 | -4.564014745  | -1.351843757 | 5.291540952   |
| H273 | -5.267145924  | 0.850274637  | 3.867649175   |
| H274 | -7.878789830  | -3.728873883 | -8.816707699  |
| H275 | -5.586886536  | -1.977150663 | 0.112961105   |
| H276 | -0.731387342  | -6.981048292 | -4.925175895  |

|      |              |              |               |
|------|--------------|--------------|---------------|
| H277 | -1.526622160 | -8.107789545 | -2.298568992  |
| H278 | -0.507484426 | -5.905928561 | -1.187126285  |
| H279 | -3.653297225 | -6.051167374 | -2.897189779  |
| H280 | -0.041473713 | -2.127074354 | -9.823131436  |
| H281 | -1.460480892 | -5.009138386 | -8.962619079  |
| H282 | -1.599969140 | -6.059313520 | -11.693391861 |
| H283 | 1.290355345  | -3.302830683 | -9.898305139  |
| H284 | -3.474435249 | -3.774807664 | -10.059053827 |
| H285 | 5.472735518  | -6.757460970 | 6.139593191   |
| H286 | 5.600118065  | -5.225156191 | 7.025971861   |
| H287 | 8.671589195  | -1.930016332 | 5.710722763   |
| H288 | 6.212677348  | -7.024664019 | 8.477814271   |
| H289 | 4.734038218  | -6.528754990 | 8.980444097   |
| H290 | 5.226195006  | -2.910393723 | -4.874001062  |
| H291 | 4.881431208  | -3.019985813 | -7.957351233  |
| H292 | 4.383601333  | -6.865190950 | -6.069007689  |
| H293 | 3.698891506  | -2.668377018 | -5.777582809  |
| H294 | 5.997788673  | -4.202500265 | -8.131200557  |
| H295 | 5.125665597  | -7.105342859 | -0.437863288  |
| H296 | 5.605791932  | -5.057484237 | -5.972970533  |
| H297 | 5.599148414  | 7.446798355  | 2.960994437   |
| H298 | 7.696422824  | 6.031134350  | 4.691342225   |
| H299 | 3.805357460  | -6.718705892 | 1.443563826   |
| H300 | 4.740654071  | 2.769154032  | -2.253825267  |
| H301 | 0.962857792  | -8.474662068 | 2.549009950   |
| H302 | -0.597888112 | -2.806413523 | 4.239342121   |
| H303 | 0.492218216  | -7.242207494 | 1.382640315   |
| H304 | 4.370086507  | 5.701962229  | 1.308333434   |
| H305 | 2.469242754  | -5.871023633 | 2.646221929   |
| H306 | 4.445786500  | 4.451914106  | 2.549960435   |
| H307 | 5.332023401  | 6.117342487  | 4.110008742   |
| H308 | 6.925671407  | 4.679228428  | 2.666814191   |
| H309 | 6.884624503  | 5.973312534  | 1.454465988   |
| H310 | -4.613616084 | -5.318306132 | 4.278243082   |
| H311 | 6.558960490  | 8.796202375  | 4.925516400   |
| H312 | 6.006650172  | 8.690450466  | 7.954616733   |
| H313 | 0.610368106  | -3.536896277 | 2.177692885   |
| H314 | 7.230420540  | 10.783495857 | 6.330995543   |
| H315 | 5.748038823  | 10.733731491 | 7.027276117   |
| H316 | 5.632985150  | 3.000311457  | 1.082463703   |
| H317 | -0.426899562 | -5.142855365 | 0.642835116   |
| H318 | -2.778966307 | -3.848837413 | 4.825664054   |
| H319 | 8.774754484  | 3.409113152  | 8.321042043   |
| H320 | 7.810366841  | 0.150209051  | 7.791245034   |
| H321 | 7.397857108  | 3.828181902  | 6.369163194   |
| H322 | 8.171054359  | 2.744038281  | 9.578843071   |
| H323 | 5.318388838  | -9.409273717 | 1.447256488   |
| H324 | 6.975837844  | 2.056921259  | 3.834548696   |
| H325 | 3.251654114  | 4.197113591  | 5.745339775   |
| H326 | 3.943000344  | -5.798737099 | 4.743144131   |
| H327 | 4.071492424  | 3.475996686  | 8.045049850   |
| H328 | 4.494101310  | -3.235418320 | 8.957513961   |
| H329 | 3.325631847  | -2.262534834 | 6.911854996   |
| H330 | 7.685562208  | 9.237567989  | 8.032166353   |
| H331 | 5.330928817  | 1.900163688  | -0.830451207  |
| H332 | 8.957554684  | 3.414872968  | 3.672291309   |
| H333 | 7.572244627  | 1.561456452  | 2.488961251   |
| H334 | 9.491308946  | 5.756357877  | 3.469556422   |
| H335 | 4.492523433  | 5.910979652  | -0.706118756  |
| H336 | 4.338588153  | 2.176218552  | 11.689480929  |
| H337 | 4.586581961  | 0.500730002  | 8.572796440   |
| H338 | 5.868483998  | 1.615181523  | 8.058237397   |

|       |               |              |               |
|-------|---------------|--------------|---------------|
| H339  | 2.854587922   | 2.195068115  | 8.310900152   |
| H340  | 1.953266374   | -4.458977856 | 4.488573944   |
| H341  | -2.629477952  | -6.218172945 | 1.223843143   |
| H342  | -4.689577269  | -6.216118213 | 2.736965770   |
| H343  | 2.755451034   | 2.900675024  | 4.608451624   |
| H344  | 9.196710211   | 4.068841160  | 5.059360826   |
| H345  | 8.187832728   | 5.102269746  | 6.787198172   |
| H346  | 4.080851136   | 4.987782479  | -2.086951405  |
| H347  | 6.930159559   | -2.451794761 | 9.134021594   |
| H348  | 7.327760873   | 0.178597864  | 6.092476081   |
| H349  | 1.260857780   | -5.283546587 | 5.917062576   |
| H350  | 4.031528167   | -8.404538689 | -0.965541358  |
| H351  | 7.137463544   | 3.695252541  | -2.956809640  |
| H352  | 7.315544502   | 1.976274909  | -2.545978734  |
| H353  | 10.187609628  | -2.613785327 | 7.356455033   |
| H354  | 9.722442856   | -1.458185388 | 8.417923458   |
| H355  | 11.343085995  | 2.566123954  | 6.982840940   |
| H356  | 9.584736725   | 1.181393709  | 7.447036190   |
| H357  | 12.724496616  | 0.214590558  | 6.796557430   |
| H358  | 10.972307148  | 2.247156223  | 5.273856192   |
| H359  | 10.046646653  | 2.261248546  | -2.486895577  |
| H360  | -4.495821130  | -2.993545064 | -12.982052783 |
| H361  | 10.457942999  | 8.227549958  | 2.047089091   |
| H362  | 9.777101784   | 6.076165908  | 0.508832479   |
| H363  | -6.101975551  | -4.559569679 | -10.946775701 |
| H364  | -4.997420628  | -1.788000703 | -10.180046507 |
| H365  | -6.708113332  | -2.186343359 | -10.408322853 |
| H366  | 1.628577543   | 0.523093254  | 3.243870242   |
| H367  | -6.873673000  | -4.989842520 | -4.576776665  |
| H368  | 0.290648683   | 0.321525724  | 1.248772583   |
| H369  | -1.538703233  | -0.834673519 | 0.601623376   |
| M0370 | 4.423880457   | -0.189984618 | 4.544899849   |
| N371  | 2.502744516   | 1.691311722  | -0.297359508  |
| N372  | 2.387715430   | 0.575450979  | -0.289361925  |
| N373  | -6.018066445  | 2.741916972  | 7.298518452   |
| N374  | -8.432255564  | 3.294919628  | 4.505632419   |
| N375  | -8.341858589  | 5.928632562  | 3.473908482   |
| N376  | -5.688884320  | 6.730902537  | 3.961043798   |
| N377  | -4.236905636  | 4.878671117  | 2.329335222   |
| N378  | -5.181604636  | 5.732226657  | -0.209870886  |
| N379  | -4.513585364  | 8.559130665  | -0.310425477  |
| N380  | -1.843553541  | 8.982627927  | 0.684473643   |
| N381  | -0.189398699  | 7.078899675  | -0.427202364  |
| N382  | -0.922973195  | 6.068868658  | -3.190572398  |
| N383  | -1.740156541  | 8.528122917  | -4.371838385  |
| N384  | 6.434453013   | 10.171386405 | 6.522413590   |
| N385  | 6.973780176   | 7.899928272  | 5.202790450   |
| N386  | 5.269434671   | 3.890895715  | 0.729919924   |
| N387  | 4.284516245   | 4.995430327  | -1.091969110  |
| N388  | 4.982743071   | 2.781896581  | -1.267606963  |
| N389  | 9.470216094   | 6.713838677  | 3.056101318   |
| N390  | -5.339754726  | -1.167415837 | 4.628857591   |
| N391  | -1.007147049  | -0.251232845 | 6.380211961   |
| N392  | -5.945641759  | -1.778822887 | 2.141328670   |
| N393  | -8.389808332  | -1.050127045 | 1.073364197   |
| N394  | -7.842230981  | 1.338029026  | -0.224119596  |
| N395  | -5.921506417  | 0.968248553  | -2.246853625  |
| N396  | -3.343664240  | -2.325883903 | -1.487586240  |
| N397  | -2.256465865  | -1.072390982 | -0.105948478  |
| N398  | -6.923196168  | 0.222537304  | -4.715759545  |
| N399  | -10.487652009 | -2.543930943 | -6.172637573  |
| N400  | -10.675751332 | -2.296230509 | -8.370058213  |

|      |               |              |               |
|------|---------------|--------------|---------------|
| N401 | 8.919342890   | 1.314059030  | -4.616773241  |
| N402 | 5.577447397   | -3.570608871 | -7.442657281  |
| N403 | 3.681110647   | -6.494396882 | -6.703650775  |
| N404 | 1.236595221   | -6.523044281 | -5.346349013  |
| N405 | -3.125089773  | -6.932366900 | -3.023513853  |
| N406 | -3.017958553  | -8.993479358 | -4.131564403  |
| N407 | -4.426702444  | -7.327987894 | -4.906673983  |
| N408 | 0.213311917   | -3.855665488 | -5.401513900  |
| N409 | 0.120977888   | -3.412746839 | -8.177375364  |
| N410 | -1.476631389  | -4.907794269 | -9.979041138  |
| N411 | -2.467271670  | -6.888811782 | -7.639640346  |
| N412 | -4.037937627  | -4.238198633 | -10.767673736 |
| N413 | 5.224082945   | -7.004430503 | 8.217329373   |
| N414 | 3.225551762   | -5.792977858 | 5.477892400   |
| N415 | 1.790856745   | -6.610663073 | 2.924689990   |
| N416 | 3.580373878   | -7.561203368 | 0.898853979   |
| N417 | -0.697096156  | -7.562136485 | 7.422359661   |
| N418 | -2.564956760  | -7.034047063 | 5.301049555   |
| N419 | 9.378591949   | -2.069816613 | 7.670667058   |
| N420 | 5.218625603   | -1.313761075 | 6.527577915   |
| N421 | 4.948435061   | -2.625182409 | 8.283636481   |
| N422 | 10.196718591  | 0.861593837  | 6.696452546   |
| N423 | -0.033308975  | -1.300110279 | -2.264660580  |
| N424 | 0.833558397   | -1.260172051 | -1.544691147  |
| O425 | -6.195254382  | 3.702934847  | 4.594662037   |
| O426 | -7.523731353  | 5.080721953  | 1.522395658   |
| O427 | -5.918362058  | 8.331844229  | 2.345737798   |
| O428 | -2.690398257  | 6.527320930  | 2.067630294   |
| O429 | -3.257263057  | 4.924442751  | -1.117103542  |
| O430 | -4.058408973  | 8.175089883  | -2.516855910  |
| O431 | -1.758783442  | 10.920118058 | -0.542996355  |
| O432 | 1.680584493   | 7.979818733  | 0.565690169   |
| O433 | 1.316417484   | 6.469834166  | -3.367210882  |
| O434 | -0.463606310  | 7.933521154  | -6.153685559  |
| O435 | -0.123296561  | 11.459353570 | -5.659832359  |
| O436 | 7.842885929   | 6.847219942  | 7.069708592   |
| O437 | 8.278526863   | 8.664817220  | 2.803494872   |
| O438 | 11.800509900  | 6.286656708  | 0.365651085   |
| O439 | -5.484183592  | 0.307465836  | 1.308424961   |
| O440 | -2.937616572  | -1.427819315 | 6.124253403   |
| O441 | -8.014387072  | -2.262011238 | -0.829450256  |
| O442 | -6.430248464  | -4.416411227 | -0.459537525  |
| O443 | -10.008896153 | 1.478506085  | -0.978312835  |
| O444 | -6.072594621  | 3.162067066  | -2.859619884  |
| O445 | -4.978924502  | 0.874579444  | -5.731084881  |
| O446 | -7.821127678  | 1.222354846  | -7.992972725  |
| O447 | 10.082421397  | 4.233991100  | -3.016347935  |
| O448 | 2.760539361   | 1.339875319  | -6.630280281  |
| O449 | 2.853852660   | -4.647850181 | -7.752638445  |
| O450 | 0.256675214   | -7.683663362 | -7.072618126  |
| O451 | -1.869870373  | -4.786615921 | -5.210799291  |
| O452 | -1.489911792  | -1.813803539 | -7.856932043  |
| O453 | 1.686970448   | -1.356708475 | -6.472007224  |
| O454 | -0.441394550  | -3.933572214 | -11.773809792 |
| O455 | -4.179360119  | -6.024307665 | -12.178823090 |
| O456 | -4.425586634  | -7.067430864 | -8.801703710  |
| O457 | -6.532903106  | -3.100213238 | -13.081288667 |
| O458 | -5.965570696  | -4.684276261 | -4.766278058  |
| O459 | 2.840308901   | -5.663993874 | 7.740315419   |
| O460 | 0.344789126   | -7.240604171 | 4.586232770   |
| O461 | 2.021326543   | -9.097847554 | 0.245297937   |
| O462 | 6.474937175   | -9.430347429 | -0.233491970  |

|  |                                 |              |              |              |
|--|---------------------------------|--------------|--------------|--------------|
|  | O463                            | -4.079877083 | -6.672578281 | 6.968043673  |
|  | O464                            | -0.313362359 | -2.274054802 | 8.614992304  |
|  | O465                            | 1.545840538  | -3.359266696 | 8.032667599  |
|  | O466                            | -3.615109744 | -8.483543764 | 2.222549900  |
|  | O467                            | 10.733103916 | -0.637965188 | 5.087562349  |
|  | O468                            | 13.477397645 | 1.483888260  | 5.386897767  |
|  | O469                            | 0.522559115  | 2.405700460  | 5.904715322  |
|  | O470                            | 1.152905026  | 4.078957456  | 7.224995272  |
|  | O471                            | 6.257817399  | 2.327793153  | 10.454088572 |
|  | O472                            | 4.068490105  | 1.886137444  | 10.792161559 |
|  | O473                            | 5.789192909  | 1.516409112  | 5.135324114  |
|  | O474                            | 5.745876298  | 3.585751838  | 6.028618991  |
|  | O475                            | 3.415261482  | 0.862151319  | 6.054981593  |
|  | O476                            | 9.549149816  | 4.064421038  | 4.129919264  |
|  | O477                            | 7.571251847  | 2.331668379  | 3.091011247  |
|  | O478                            | -4.618986954 | -4.540650875 | -2.511730584 |
|  | O479                            | 9.032419767  | 2.956968467  | 9.164319867  |
|  | O480                            | 8.313646997  | 4.129752916  | 6.640118159  |
|  | S481                            | 3.393035250  | -4.280337058 | -3.997589877 |
|  | S482                            | 2.095728830  | -3.692698306 | -0.498333757 |
|  | S483                            | 2.624830748  | -1.746073995 | 4.402762361  |
|  | S484                            | 3.727465060  | -1.250088548 | -2.141736415 |
|  | S485                            | 0.660025893  | -0.972816672 | 1.467637518  |
|  | S486                            | 4.348640743  | -4.638097373 | 2.580772905  |
|  | S487                            | 3.826826578  | 1.340313711  | 2.782098282  |
|  | S488                            | 5.703262528  | -3.625722550 | -0.753568258 |
|  | S489                            | 6.167507422  | -1.436109028 | 3.500310466  |
|  | S490                            | 6.402217839  | 0.255951148  | 0.205812756  |
|  | <b>6, 47(3/2)</b>               |              |              |              |
|  | <b>Fe1</b>                      | <b>3.20</b>  |              |              |
|  | <b>Fe2</b>                      | <b>0.05</b>  |              |              |
|  | <b>Fe3</b>                      | <b>2.82</b>  |              |              |
|  | <b>Fe4</b>                      | <b>-2.66</b> |              |              |
|  | <b>Fe5</b>                      | <b>2.36</b>  |              |              |
|  | <b>Fe6</b>                      | <b>-1.13</b> |              |              |
|  | <b>Fe7</b>                      | <b>-2.27</b> |              |              |
|  | <b>bm22b2n2x6x2n2ndte.car_4</b> |              |              |              |
|  | C1                              | -7.454587082 | 3.159107257  | 5.015127197  |
|  | C2                              | -7.513939390 | 2.835028821  | 6.510168043  |
|  | C3                              | -8.677135595 | 3.242545934  | 2.887995685  |
|  | C4                              | -8.295515800 | 4.650706617  | 2.434163041  |
|  | C5                              | -8.250734926 | 7.038710617  | 2.947201217  |
|  | C6                              | -6.740073433 | 7.298267987  | 2.929605464  |
|  | C7                              | -4.543896115 | 6.633953738  | 3.788840848  |
|  | C8                              | -3.907024646 | 5.945791904  | 2.577406615  |
|  | C9                              | -3.975703265 | 4.076902972  | 1.010084338  |
|  | C10                             | -4.231198926 | 4.859944484  | -0.286946002 |
|  | C11                             | -5.664628676 | 6.375203527  | -1.528126907 |
|  | C12                             | -4.849118948 | 7.675220551  | -1.594590279 |
|  | C13                             | -4.238528407 | 9.758879663  | -0.464049410 |
|  | C14                             | -2.728088359 | 9.874157875  | -0.223122391 |
|  | C15                             | -0.763057091 | 8.975463617  | 0.956614323  |
|  | C16                             | 0.173619054  | 7.970656973  | 0.276833097  |
|  | C17                             | 0.258723881  | 5.985617172  | -1.223804601 |
|  | C18                             | 0.133612876  | 6.184305751  | -2.744926885 |
|  | C19                             | -0.206187669 | 4.588067794  | -0.748632888 |
|  | C20                             | 0.319183622  | 3.484671334  | -1.672769415 |
|  | C21                             | 0.188897207  | 4.354474598  | 0.714720781  |
|  | C22                             | -1.303214270 | 6.081083073  | -4.731608578 |
|  | C23                             | -1.283279465 | 7.540138541  | -5.221967474 |
|  | C24                             | -2.575767069 | 5.312079204  | -5.160000867 |
|  | C25                             | -2.841711633 | 5.476541918  | -6.660198866 |
|  | C26                             | -2.460769581 | 3.824504950  | -4.796608898 |
|  | C27                             | -2.021908457 | 9.826277363  | -4.889189155 |
|  | C28                             | -0.640931440 | 10.427372615 | -5.062211148 |
|  | C29                             | 6.421589030  | 9.310293682  | 7.395621830  |
|  | C30                             | 6.891496030  | 8.101763947  | 6.585110276  |
|  | C31                             | 7.013991237  | 7.205025603  | 4.256712237  |
|  | C32                             | 8.108255547  | 7.832762867  | 3.370304895  |

|     |               |              |               |
|-----|---------------|--------------|---------------|
| C33 | 5.784954624   | 6.778875429  | 3.434305128   |
| C34 | 6.104452639   | 5.754102741  | 2.342607507   |
| C35 | 4.831261617   | 5.121324565  | 1.778936608   |
| C36 | 4.749700650   | 4.079675088  | -0.500087677  |
| C37 | 10.335931279  | 7.521112632  | 2.396969996   |
| C38 | 10.503670237  | 6.797225590  | 1.078790382   |
| C39 | -4.970931818  | -0.315389073 | 3.586068624   |
| C40 | -5.500181873  | -0.676055445 | 2.188081071   |
| C41 | -3.432464816  | -0.192746798 | 3.476401710   |
| C42 | -2.711674725  | 0.459484902  | 4.674514545   |
| C43 | -2.282393307  | -0.507465725 | 5.777247049   |
| C44 | -6.231906611  | -2.552167185 | 0.783661303   |
| C45 | -7.588051117  | -2.137516872 | 0.198440819   |
| C46 | -6.094799726  | -4.088048862 | 0.797415505   |
| C47 | -9.510230293  | -0.633241610 | 0.373524748   |
| C48 | -9.158302492  | 0.592128936  | -0.481455001  |
| C49 | -7.444321112  | 2.237720834  | -1.113424974  |
| C50 | -6.425329668  | 2.002715114  | -2.228693198  |
| C51 | -4.937947988  | 0.435189475  | -3.397343361  |
| C52 | -5.563831454  | 0.385563921  | -4.814872818  |
| C53 | -4.288605021  | -0.940552602 | -3.190903269  |
| C54 | -3.495359844  | -1.162585693 | -1.942222694  |
| C55 | -2.834457924  | -0.342215675 | -1.060204657  |
| C56 | -2.426156795  | -2.443913288 | -0.457935544  |
| C57 | -7.543424663  | -0.376045663 | -6.087556954  |
| C58 | -7.691523472  | 0.874052275  | -6.953350401  |
| C59 | -8.925429303  | -0.956622051 | -5.709081422  |
| C60 | -9.604150213  | -1.795830775 | -6.750890638  |
| C61 | -9.686892928  | -1.650208654 | -8.122680640  |
| C62 | -10.785736751 | -3.461163568 | -7.469180100  |
| C63 | 8.633301859   | 2.838368251  | -4.022299876  |
| C64 | 9.663817043   | 3.338349684  | -3.026838506  |
| C65 | 7.267635927   | 2.854116120  | -3.298335254  |
| C66 | 6.110770614   | 2.484560555  | -4.197855129  |
| C67 | 5.422509631   | 3.458394627  | -4.946324907  |
| C68 | 5.680632628   | 1.149888770  | -4.298771946  |
| C69 | 4.333178360   | 3.115620359  | -5.755341338  |
| C70 | 4.603563576   | 0.791527960  | -5.109051025  |
| C71 | 3.928382104   | 1.776863694  | -5.833385579  |
| C72 | 5.139682237   | -4.255150261 | -6.294200878  |
| C73 | 4.020984128   | -5.108299354 | -6.907214908  |
| C74 | 4.560719215   | -3.340010470 | -5.205714340  |
| C75 | 3.016198810   | -7.344125932 | -7.070733150  |
| C76 | 1.634296271   | -7.197783353 | -6.432645883  |
| C77 | 0.305209853   | -6.249876590 | -4.583753613  |
| C78 | -0.362375706  | -4.949378278 | -5.082953984  |
| C79 | 0.535176598   | -6.255596909 | -3.060764377  |
| C80 | -0.688846933  | -6.042436566 | -2.162907195  |
| C81 | -1.707367906  | -7.194245299 | -2.075131108  |
| C82 | -3.170647782  | -7.899161385 | -3.982341686  |
| C83 | -0.122313619  | -2.657955500 | -5.883547465  |
| C84 | -0.399489366  | -2.675941424 | -7.399711642  |
| C85 | 0.729883304   | -1.420726382 | -5.572072783  |
| C86 | 0.524528436   | -3.261798647 | -9.588424748  |
| C87 | -0.262540829  | -4.165028036 | -10.534339351 |
| C88 | -1.824210710  | -6.052580923 | -10.777239193 |
| C89 | -3.200658832  | -5.608840146 | -11.315762131 |
| C90 | -1.943796782  | -7.396776012 | -10.023660637 |
| C91 | -2.788497589  | -7.264006919 | -8.761657673  |
| C92 | -5.055853961  | -4.015345944 | -11.112663778 |
| C93 | -5.154088174  | -3.533867064 | -12.556361120 |
| C94 | -5.479898030  | -2.880159790 | -10.143656892 |

|       |              |              |              |
|-------|--------------|--------------|--------------|
| C95   | -5.569431326 | -3.350264763 | -8.709853516 |
| C96   | -6.732258523 | -3.985798197 | -8.245453309 |
| C97   | -4.486888843 | -3.218207719 | -7.824269377 |
| C98   | -6.811608417 | -4.494453323 | -6.947323492 |
| C99   | -4.538655780 | -3.743582148 | -6.528158893 |
| C100  | -5.701756478 | -4.385262722 | -6.108583665 |
| C101  | 5.161737078  | -5.960606174 | 7.141015377  |
| C102  | 3.688979741  | -5.691966643 | 6.881273696  |
| C103  | 1.986878833  | -5.299467310 | 5.119115517  |
| C104  | 1.413400118  | -6.417054547 | 4.240874278  |
| C105  | 1.570498685  | -7.538874443 | 2.069352020  |
| C106  | 2.622217883  | -8.042525029 | 1.084545071  |
| C107  | 4.839947811  | -7.810519249 | 0.073563802  |
| C108  | 5.830627742  | -8.827435140 | 0.607287551  |
| C109  | -1.669932065 | -6.516074021 | 7.596313959  |
| C110  | -2.801359950 | -6.774796922 | 6.593006892  |
| C111  | -1.244356242 | -5.030947534 | 7.522825337  |
| C112  | -0.388960428 | -4.629208093 | 8.737273779  |
| C113  | 0.242362525  | -3.272234381 | 8.519686889  |
| C114  | -3.427300470 | -7.304418330 | 4.287092625  |
| C115  | -2.995511086 | -8.460435498 | 3.406210362  |
| C116  | -3.887031731 | -6.039989838 | 3.517319393  |
| C117  | -2.713025972 | -5.208815555 | 3.073650701  |
| C118  | -1.998991429 | -5.525430013 | 1.905561012  |
| C119  | -2.218502355 | -4.194110176 | 3.912675692  |
| C120  | -0.787685345 | -4.883833302 | 1.623619859  |
| C121  | -1.004829361 | -3.559285252 | 3.632730966  |
| C122  | -0.272612856 | -3.926654610 | 2.501406436  |
| C123  | 8.801127723  | -0.889254603 | 6.721528459  |
| C124  | 9.875373595  | 0.082913173  | 6.207870960  |
| C125  | 7.479488138  | -0.173363666 | 7.039963747  |
| C126  | 6.318168198  | -1.058889973 | 7.373052596  |
| C127  | 6.169269218  | -1.870071060 | 8.480918427  |
| C128  | 4.297444033  | -1.885559410 | 7.295989441  |
| C129  | 11.053500258 | 2.197934880  | 6.411264774  |
| C130  | 12.412796402 | 1.545561169  | 6.285356368  |
| C131  | 1.193891893  | 3.232620910  | 6.219326212  |
| C132  | 2.593137326  | 3.329086884  | 5.681302417  |
| C133  | 3.607144976  | 2.341379941  | 6.390759908  |
| C134  | 3.627193481  | 2.624436601  | 7.919448169  |
| C135  | 4.707423888  | 1.803536718  | 8.644242370  |
| C136  | 4.939602329  | 2.226476867  | 10.066451054 |
| C137  | 5.025855994  | 2.704432078  | 5.844465908  |
| C138  | 3.816675595  | -1.440038648 | 1.258254203  |
| Fe139 | 4.240207555  | -2.272580736 | 3.056359041  |
| Fe140 | 2.228800703  | -1.121829784 | -0.258892505 |
| Fe141 | 5.084182790  | -1.239196042 | -0.248918983 |
| Fe142 | 4.072438807  | -3.365107430 | 0.784664887  |
| Fe143 | 3.840811966  | -3.202396455 | -1.836434745 |
| Fe144 | 5.061453595  | -0.088209319 | 2.020976353  |
| Fe145 | 2.542966066  | -0.363917230 | 2.693396116  |
| H146  | -5.584125775 | 3.342597122  | 6.935450919  |
| H147  | -5.811451507 | 1.732535564  | 6.786257176  |
| H148  | -9.428330933 | 2.621787257  | 4.792613852  |
| H149  | -8.184620640 | 1.977788787  | 6.674535196  |
| H150  | -7.998792560 | 3.701092856  | 6.995068570  |
| H151  | -7.991801648 | 2.557095187  | 2.368924337  |
| H152  | -9.086196072 | 5.460317772  | 4.146082476  |
| H153  | -9.700013491 | 3.031331258  | 2.548390014  |
| H154  | -8.712462614 | 7.701884685  | 3.691179590  |
| H155  | -6.438893545 | 5.794117972  | 4.294568585  |
| H156  | -8.632802521 | 7.316021600  | 1.956044334  |



|      |              |              |              |
|------|--------------|--------------|--------------|
| H157 | -2.891653887 | 3.911711903  | 1.064785716  |
| H158 | -5.189245946 | 4.335465485  | 2.770552714  |
| H159 | -4.169912391 | 6.168910436  | 4.711478739  |
| H160 | -5.435481507 | 5.801621760  | -2.434678517 |
| H161 | -6.092324519 | 5.474519154  | 0.381577421  |
| H162 | -4.220107628 | 7.681200589  | 3.773320861  |
| H163 | -4.470724932 | 3.096235664  | 0.956840905  |
| H164 | -5.342777603 | 8.129323309  | 0.366547995  |
| H165 | -6.734471222 | 6.627738377  | -1.529982220 |
| H166 | -0.249062942 | 5.121575176  | 1.371217441  |
| H167 | -0.177854241 | 3.373120512  | 1.054903497  |
| H168 | 1.281501246  | 4.360613532  | 0.847072011  |
| H169 | -1.305898111 | 4.573505633  | -0.802215779 |
| H170 | -4.740263972 | 10.350943979 | 0.314953977  |
| H171 | -2.391651978 | 3.661834019  | -3.712025121 |
| H172 | -2.563812277 | 8.139279349  | -3.697675069 |
| H173 | -3.012045796 | 6.526097885  | -6.940184050 |
| H174 | 0.007226375  | 2.502122510  | -1.290554705 |
| H175 | 1.416222853  | 3.488395381  | -1.717981945 |
| H176 | 8.587160248  | 3.582166483  | -4.841988134 |
| H177 | -3.346320337 | 3.279942912  | -5.155419426 |
| H178 | -3.731392315 | 4.896678558  | -6.945319563 |
| H179 | -1.572137991 | 3.376889278  | -5.271305578 |
| H180 | -1.990103327 | 5.104493956  | -7.252002644 |
| H181 | -3.430270343 | 5.742105818  | -4.606758583 |
| H182 | -0.428963368 | 5.616077093  | -5.213221736 |
| H183 | -1.878849328 | 5.675774489  | -2.698294078 |
| H184 | -0.069265087 | 3.584053179  | -2.695642766 |
| H185 | 1.034948309  | -1.452952460 | -4.514069029 |
| H186 | 0.082703085  | -0.541763407 | -5.723282599 |
| H187 | 2.170478361  | -0.439314228 | -6.467578817 |
| H188 | 2.439289792  | 2.143528559  | -7.027337698 |
| H189 | 4.264223992  | -0.243188040 | -5.144621244 |
| H190 | 6.164629990  | 0.379368007  | -3.694469769 |
| H191 | 5.729992194  | 4.506257179  | -4.889366460 |
| H192 | -1.452371370 | 7.099766821  | -0.576856981 |
| H193 | -0.680246419 | 8.808996408  | 2.040822081  |
| H194 | -0.380405464 | 9.980955845  | 0.738099346  |
| H195 | -2.744516707 | 8.205286143  | 1.015584152  |
| H196 | -4.429536060 | 10.235798522 | -1.434051588 |
| H197 | 3.799580620  | 3.886283125  | -6.318447277 |
| H198 | 1.325648867  | 6.116317182  | -0.999462921 |
| H199 | -2.590804290 | 9.970402094  | -5.822981457 |
| H200 | -2.524666143 | 10.399840498 | -4.094280663 |
| H201 | 0.162578722  | 9.938453818  | -4.464487589 |
| H202 | 11.268391587 | 7.451736387  | 2.976254900  |
| H203 | -0.786924344 | -0.846911424 | 7.135207773  |
| H204 | 1.613982254  | 4.715325150  | 7.379518062  |
| H205 | -1.030408638 | -4.571840891 | 9.628651984  |
| H206 | 0.390292615  | -5.383353586 | 8.919477940  |
| H207 | -2.132611247 | -4.381371084 | 7.482628928  |
| H208 | -2.368130557 | -9.220975582 | 3.926570261  |
| H209 | -2.148187650 | -6.674250307 | 8.574764707  |
| H210 | -3.012906296 | -1.195247994 | 3.290657170  |
| H211 | -3.362048157 | 1.218110356  | 5.143735753  |
| H212 | -1.436674072 | -7.064384846 | 5.056023007  |
| H213 | -4.313542477 | -7.694362734 | 4.827411731  |
| H214 | -0.005423333 | -7.324030233 | 6.655384706  |
| H215 | -0.509657170 | 0.538318717  | 6.083449585  |
| H216 | -0.693771325 | -4.867246393 | 6.583793257  |
| H217 | 0.004856844  | -7.472442760 | 8.297686374  |
| H218 | -6.210442535 | -1.024156182 | 5.079033868  |

|      |               |              |               |
|------|---------------|--------------|---------------|
| H219 | -3.223652058  | 0.417636353  | 2.585563629   |
| H220 | 1.912086428   | -4.188658490 | 8.014945862   |
| H221 | -1.830771099  | 1.005442228  | 4.308131097   |
| H222 | -4.179561598  | 1.230645402  | -3.424228122  |
| H223 | -2.762897792  | 0.737781732  | -1.006303068  |
| H224 | -8.328322299  | 2.690500164  | -1.581629302  |
| H225 | -7.225345108  | 0.647764496  | 0.295488688   |
| H226 | -7.357366490  | -0.122791001 | -3.967571428  |
| H227 | -9.272707202  | -0.917323452 | -8.806067705  |
| H228 | -7.853218718  | 1.813129149  | -6.368417385  |
| H229 | -9.579532637  | -0.133112359 | -5.371361981  |
| H230 | -6.954936986  | -1.120687928 | -6.646574327  |
| H231 | -11.384976903 | -4.364926288 | -7.539170524  |
| H232 | -3.625268381  | -1.108288582 | -4.054796198  |
| H233 | -5.073256410  | -1.712727364 | -3.250364429  |
| H234 | -10.685283309 | -2.918120037 | -9.526232422  |
| H235 | -8.776330632  | -1.608427028 | -4.834171538  |
| H236 | -6.142462801  | 0.041485542  | -1.651680117  |
| H237 | -7.025063235  | 2.989691663  | -0.428785466  |
| H238 | -10.081434687 | -1.319080778 | -0.264046578  |
| H239 | -2.037473034  | -3.300904565 | 0.086560491   |
| H240 | -10.167517598 | -0.304622069 | 1.189322241   |
| H241 | 9.761858066   | 1.531355254  | -5.123031518  |
| H242 | 8.200128654   | 1.079585809  | -4.972055332  |
| H243 | 1.437781374   | -3.918776737 | -5.058817315  |
| H244 | -1.101115189  | -2.517676977 | -5.402609382  |
| H245 | 1.200136523   | -3.924453443 | -7.702661575  |
| H246 | -3.613345172  | -3.333496932 | -1.989936823  |
| H247 | -5.092533350  | -4.798442086 | -1.802405055  |
| H248 | -4.942460382  | -4.606209939 | -3.376932197  |
| H249 | -5.085956729  | -4.355986960 | 1.138355664   |
| H250 | -6.831157659  | -4.527483080 | 1.490726905   |
| H251 | -0.929658662  | -7.757578421 | -9.798570552  |
| H252 | -2.433169787  | -8.114406444 | -10.694858240 |
| H253 | -1.086155481  | -7.223981371 | -7.513653139  |
| H254 | -2.621923447  | -6.864408339 | -6.766159365  |
| H255 | -2.859150060  | -9.709206081 | -4.884264816  |
| H256 | -2.136704050  | -7.233695538 | -1.063156324  |
| H257 | -7.729937782  | -4.973889341 | -6.598131754  |
| H258 | -3.574812726  | -2.698302494 | -8.131456749  |
| H259 | -4.549841551  | -6.621601991 | -4.833727833  |
| H260 | 1.264116496   | -5.467530290 | -2.815098956  |
| H261 | 2.411208118   | -6.046417284 | -4.903882146  |
| H262 | -1.209644088  | -5.110330515 | -2.432982937  |
| H263 | -8.052044963  | -1.093618689 | 1.879825601   |
| H264 | 3.355812620   | -8.375607307 | -6.904632808  |
| H265 | -5.860980071  | -2.489425866 | 2.956730730   |
| H266 | 1.010384346   | -7.216486787 | -2.802784637  |
| H267 | -3.664225595  | -3.691491170 | -5.875934526  |
| H268 | -6.998473551  | -4.089881536 | -0.930336546  |
| H269 | 2.871412950   | -7.208737252 | -8.150948399  |
| H270 | -2.116663768  | -9.544364170 | -3.334410848  |
| H271 | -4.582980273  | -8.247577912 | -5.417526084  |
| H272 | -4.610036794  | -1.474495740 | 5.245871157   |
| H273 | -5.372881882  | 0.692735713  | 3.800004767   |
| H274 | -7.595993574  | -4.086674362 | -8.907410509  |
| H275 | -5.504384996  | -2.159870328 | 0.052564250   |
| H276 | -0.390044163  | -7.051469072 | -4.868276310  |
| H277 | -1.202694844  | -8.154732415 | -2.236498692  |
| H278 | -0.292816776  | -5.886815963 | -1.150266126  |
| H279 | -3.406593034  | -6.203290349 | -2.894605349  |
| H280 | 0.225811823   | -2.228553980 | -9.820465727  |

|      |              |              |               |
|------|--------------|--------------|---------------|
| H281 | -1.138322913 | -5.135846844 | -8.951100830  |
| H282 | -1.207901765 | -6.219496804 | -11.672765225 |
| H283 | 1.582966138  | -3.375476539 | -9.860328664  |
| H284 | -3.162578511 | -3.963998750 | -10.101735055 |
| H285 | 5.592856189  | -6.524165929 | 6.300774864   |
| H286 | 5.654075624  | -4.966236918 | 7.147493582   |
| H287 | 8.631856607  | -1.595066589 | 5.895135627   |
| H288 | 6.306340195  | -6.678614283 | 8.669952658   |
| H289 | 4.786111560  | -6.261200554 | 9.119094969   |
| H290 | 5.383179087  | -2.776725214 | -4.746881746  |
| H291 | 5.103512429  | -2.915737596 | -7.829961759  |
| H292 | 4.730044302  | -6.771070154 | -5.927806897  |
| H293 | 3.850675858  | -2.636553596 | -5.663325175  |
| H294 | 6.284810995  | -4.036940477 | -7.981639716  |
| H295 | 5.390829557  | -6.914829913 | -0.254932848  |
| H296 | 5.891282222  | -4.916378580 | -5.834997693  |
| H297 | 5.322238040  | 7.677029737  | 2.991766036   |
| H298 | 7.414901627  | 6.330168679  | 4.781905927   |
| H299 | 4.022961653  | -6.585562086 | 1.604351633   |
| H300 | 4.696398755  | 2.948668408  | -2.211518109  |
| H301 | 1.210199484  | -8.407738233 | 2.636296680   |
| H302 | -0.619930770 | -2.786124346 | 4.301323125   |
| H303 | 0.718863764  | -7.193734513 | 1.458925869   |
| H304 | 4.169093947  | 5.876839779  | 1.336686771   |
| H305 | 2.627708666  | -5.754771082 | 2.744464366   |
| H306 | 4.260533939  | 4.640632154  | 2.589006229   |
| H307 | 5.060819172  | 6.350485760  | 4.145886436   |
| H308 | 6.728321980  | 4.944641461  | 2.750275023   |
| H309 | 6.672539377  | 6.225673036  | 1.524565695   |
| H310 | -4.532753214 | -5.458669353 | 4.190850474   |
| H311 | 6.206678395  | 9.068873708  | 4.973820179   |
| H312 | 5.574301828  | 8.957856145  | 8.003594178   |
| H313 | 0.695657289  | -3.472510136 | 2.294083289   |
| H314 | 6.763922129  | 11.086653368 | 6.408548198   |
| H315 | 5.258864663  | 10.972548434 | 7.046385901   |
| H316 | 5.495797609  | 3.204530831  | 1.148917298   |
| H317 | -0.211260658 | -5.136823704 | 0.732594824   |
| H318 | -2.778843061 | -3.911268540 | 4.806606762   |
| H319 | 8.511629052  | 3.766479760  | 8.449355111   |
| H320 | 7.643262211  | 0.509142248  | 7.892620886   |
| H321 | 7.152158584  | 4.129025454  | 6.463186017   |
| H322 | 7.910978511  | 3.088984658  | 9.701224795   |
| H323 | 5.622162457  | -9.201370492 | 1.639012016   |
| H324 | 6.829945866  | 2.329647998  | 3.923376344   |
| H325 | 2.981795775  | 4.354472650  | 5.767876696   |
| H326 | 4.059278608  | -5.607524745 | 4.865335503   |
| H327 | 3.822915329  | 3.697505463  | 8.071679618   |
| H328 | 4.447950304  | -2.992368716 | 9.091349319   |
| H329 | 3.276010211  | -2.105209950 | 7.010409517   |
| H330 | 7.237520722  | 9.545584542  | 8.100492401   |
| H331 | 5.255456461  | 2.092420856  | -0.766280349  |
| H332 | 8.770685873  | 3.747362164  | 3.801421043   |
| H333 | 7.446924338  | 1.865178949  | 2.575236262   |
| H334 | 9.238761606  | 6.097635601  | 3.585338645   |
| H335 | 4.360046491  | 6.092446445  | -0.665927305  |
| H336 | 4.071401691  | 2.430185191  | 11.735683350  |
| H337 | 4.412342851  | 0.743502132  | 8.633180434   |
| H338 | 5.671789754  | 1.890195164  | 8.130545460   |
| H339 | 2.639874101  | 2.385956248  | 8.341685415   |
| H340 | 2.020884115  | -4.345823655 | 4.569008994   |
| H341 | -2.377091526 | -6.308250490 | 1.243478273   |
| H342 | -4.494914903 | -6.382493114 | 2.665918631   |

|       |               |              |               |
|-------|---------------|--------------|---------------|
| H343  | 2.573858486   | 3.034667154  | 4.623553834   |
| H344  | 8.960702024   | 4.420008710  | 5.188745731   |
| H345  | 7.882265480   | 5.431222897  | 6.896956138   |
| H346  | 4.028955968   | 5.171588273  | -2.071265630  |
| H347  | 6.851167949   | -2.106846750 | 9.289591336   |
| H348  | 7.197895688   | 0.455628448  | 6.186179230   |
| H349  | 1.339123166   | -5.189906322 | 5.991045744   |
| H350  | 4.351925159   | -8.247844370 | -0.811599643  |
| H351  | 7.120518456   | 3.865698759  | -2.891528008  |
| H352  | 7.317627774   | 2.156797312  | -2.447071279  |
| H353  | 10.133004032  | -2.183062989 | 7.593433802   |
| H354  | 9.594123098   | -1.025923732 | 8.617660968   |
| H355  | 11.144053779  | 2.991582481  | 7.169559718   |
| H356  | 9.413464020   | 1.563917032  | 7.616064750   |
| H357  | 12.585075227  | 0.684256236  | 6.973778270   |
| H358  | 10.778865735  | 2.677026514  | 5.457649166   |
| H359  | 10.110394243  | 2.545408989  | -2.380227344  |
| H360  | -4.182253268  | -3.273705988 | -13.038521754 |
| H361  | 10.158677707  | 8.584318992  | 2.156800767   |
| H362  | 9.560200712   | 6.395995051  | 0.634517870   |
| H363  | -5.756656956  | -4.859391438 | -11.002707394 |
| H364  | -4.762769029  | -2.048393030 | -10.233077035 |
| H365  | -6.455509335  | -2.506899577 | -10.486899651 |
| H366  | 1.549064574   | 0.586587336  | 3.322923870   |
| H367  | -6.617456112  | -5.288666636 | -4.644821793  |
| H368  | 0.256127109   | 0.352062686  | 1.316643600   |
| H369  | -1.493576355  | -0.894119904 | 0.562857628   |
| M0370 | 4.345370816   | -0.007703587 | 4.636792542   |
| N371  | 2.428309353   | 1.834003793  | -0.172188272  |
| N372  | 2.370000570   | 0.714350796  | -0.189888068  |
| N373  | -6.236387419  | 2.585647458  | 7.157844915   |
| N374  | -8.625483541  | 3.040534464  | 4.329815169   |
| N375  | -8.611044621  | 5.668172037  | 3.271342884   |
| N376  | -5.997016762  | 6.566573808  | 3.797245756   |
| N377  | -4.451850256  | 4.758900059  | 2.205749442   |
| N378  | -5.384793187  | 5.569677992  | -0.350290784  |
| N379  | -4.812257100  | 8.421658329  | -0.458624809  |
| N380  | -2.160891148  | 8.915748811  | 0.562910138   |
| N381  | -0.437257023  | 7.055653354  | -0.517684339  |
| N382  | -1.108284216  | 6.003340463  | -3.282871908  |
| N383  | -1.969696214  | 8.439311261  | -4.472967279  |
| N384  | 5.987725085   | 10.441318121 | 6.568342693   |
| N385  | 6.629279313   | 8.181178284  | 5.267113452   |
| N386  | 5.123805964   | 4.086683043  | 0.785701066   |
| N387  | 4.188465681   | 5.176227152  | -1.068363781  |
| N388  | 4.897842761   | 2.963655634  | -1.215668372  |
| N389  | 9.198319151   | 7.052240217  | 3.166371285   |
| N390  | -5.378958545  | -1.325177681 | 4.566871418   |
| N391  | -1.104021046  | -0.241844259 | 6.371402111   |
| N392  | -5.922992393  | -1.962915351 | 2.070235133   |
| N393  | -8.366455441  | -1.325127545 | 0.940532505   |
| N394  | -7.881586924  | 1.066685516  | -0.373669318  |
| N395  | -5.918162718  | 0.736091824  | -2.359878476  |
| N396  | -3.224937220  | -2.463253030 | -1.532693528  |
| N397  | -2.192950811  | -1.163252959 | -0.152715886  |
| N398  | -6.855804602  | -0.030490233 | -4.847509305  |
| N399  | -10.295860920 | -2.930359015 | -6.355792881  |
| N400  | -10.439488931 | -2.719949797 | -8.560053089  |
| N401  | 8.986474277   | 1.485351488  | -4.456830097  |
| N402  | 5.818746333   | -3.427832056 | -7.302752078  |
| N403  | 4.036906699   | -6.434183480 | -6.590809169  |
| N404  | 1.569857481   | -6.530750934 | -5.259061426  |

|      |               |              |               |
|------|---------------|--------------|---------------|
| N405 | -2.832873493  | -7.056918476 | -3.008319968  |
| N406 | -2.577443249  | -9.101449579 | -4.121561547  |
| N407 | -4.075547163  | -7.523584882 | -4.915546519  |
| N408 | 0.453569518   | -3.898688362 | -5.371481847  |
| N409 | 0.389213400   | -3.492772259 | -8.156976645  |
| N410 | -1.140541891  | -5.046337438 | -9.968707831  |
| N411 | -2.089696508  | -7.032046182 | -7.618661966  |
| N412 | -3.708644042  | -4.463046283 | -10.799988392 |
| N413 | 5.326417833   | -6.724014865 | 8.382342446   |
| N414 | 3.328605321   | -5.623695605 | 5.586325067   |
| N415 | 1.972279322   | -6.516498675 | 3.018494898   |
| N416 | 3.831351613   | -7.426810520 | 1.045663443   |
| N417 | -0.598220440  | -7.511642622 | 7.473349005   |
| N418 | -2.429027683  | -7.071161751 | 5.315875371   |
| N419 | 9.295313840   | -1.665492996 | 7.874682237   |
| N420 | 5.135825194   | -1.090271445 | 6.636406258   |
| N421 | 4.889848324   | -2.378683620 | 8.412342720   |
| N422 | 10.041479447  | 1.260896095  | 6.871516584   |
| N423 | 0.066993646   | -1.173984752 | -2.287375904  |
| N424 | 0.899640447   | -1.133370559 | -1.528915937  |
| O425 | -6.414532124  | 3.561811111  | 4.460116848   |
| O426 | -7.730500243  | 4.829745738  | 1.343018570   |
| O427 | -6.256640222  | 8.159582320  | 2.176855681   |
| O428 | -2.954011536  | 6.454594839  | 1.967710497   |
| O429 | -3.416474041  | 4.833813306  | -1.222414133  |
| O430 | -4.294011180  | 8.028094179  | -2.648822264  |
| O431 | -2.103651606  | 10.829651098 | -0.702365004  |
| O432 | 1.393589872   | 8.020268602  | 0.489301443   |
| O433 | 1.114484512   | 6.487998725  | -3.438274095  |
| O434 | -0.671019574  | 7.874471103  | -6.249329665  |
| O435 | -0.420640583  | 11.411726024 | -5.751526990  |
| O436 | 7.447422970   | 7.146006591  | 7.167420016   |
| O437 | 7.967281960   | 8.977441084  | 2.904527970   |
| O438 | 11.577823040  | 6.666927016  | 0.513388531   |
| O439 | -5.522086773  | 0.136638104  | 1.239938335   |
| O440 | -2.999645602  | -1.475609377 | 6.118954430   |
| O441 | -7.895180606  | -2.517033497 | -0.952814334  |
| O442 | -6.274161033  | -4.632048197 | -0.520537277  |
| O443 | -10.025385491 | 1.095832054  | -1.204272440  |
| O444 | -6.101071052  | 2.925964908  | -2.978868642  |
| O445 | -4.884894331  | 0.599085280  | -5.822214701  |
| O446 | -7.669748681  | 0.874612719  | -8.171983212  |
| O447 | 9.978780693   | 4.513897096  | -2.901904300  |
| O448 | 2.852675600   | 1.371084260  | -6.600330722  |
| O449 | 3.151707133   | -4.626791516 | -7.656909746  |
| O450 | 0.652081118   | -7.722488793 | -6.996774078  |
| O451 | -1.597576253  | -4.905328033 | -5.219741537  |
| O452 | -1.267908262  | -1.933420744 | -7.878463739  |
| O453 | 1.866834299   | -1.370226975 | -6.438205700  |
| O454 | -0.100891976  | -4.064429320 | -11.756865777 |
| O455 | -3.788376608  | -6.282355729 | -12.174116829 |
| O456 | -4.029279271  | -7.276432536 | -8.800086933  |
| O457 | -6.217985426  | -3.403244554 | -13.140059037 |
| O458 | -5.718324391  | -4.949209935 | -4.819486903  |
| O459 | 2.893384338   | -5.520819556 | 7.840442780   |
| O460 | 0.510486262   | -7.178227916 | 4.653988462   |
| O461 | 2.317079791   | -8.984978037 | 0.333982797   |
| O462 | 6.791917004   | -9.221344568 | -0.033169407  |
| O463 | -3.994012427  | -6.690182663 | 6.931333570   |
| O464 | -0.362195078  | -2.212222463 | 8.661012588   |
| O465 | 1.522674449   | -3.262848436 | 8.103406734   |
| O466 | -3.322162669  | -8.604416787 | 2.236403990   |

|  |                                   |              |              |              |
|--|-----------------------------------|--------------|--------------|--------------|
|  | O467                              | 10.633711256 | -0.225697247 | 5.269455268  |
|  | O468                              | 13.300430568 | 1.967017505  | 5.557098053  |
|  | O469                              | 0.345915039  | 2.426295342  | 5.864600151  |
|  | O470                              | 0.854546731  | 4.126867048  | 7.204848130  |
|  | O471                              | 6.008801277  | 2.613095262  | 10.531956502 |
|  | O472                              | 3.822496838  | 2.131896520  | 10.834978814 |
|  | O473                              | 5.641195138  | 1.754021114  | 5.221049447  |
|  | O474                              | 5.509599740  | 3.838734008  | 6.069293566  |
|  | O475                              | 3.283057545  | 1.028427687  | 6.122729477  |
|  | O476                              | 9.332591705  | 4.417519200  | 4.266872820  |
|  | O477                              | 7.426739480  | 2.625524516  | 3.189972444  |
|  | O478                              | -4.425262634 | -4.720327033 | -2.540780247 |
|  | O479                              | 8.771461806  | 3.328009054  | 9.298914349  |
|  | O480                              | 8.049469802  | 4.463986141  | 6.755348413  |
|  | S481                              | 3.663380138  | -4.283807816 | -3.888915799 |
|  | S482                              | 2.156542966  | -3.568047953 | -0.373516048 |
|  | S483                              | 2.613157689  | -1.646003296 | 4.478943547  |
|  | S484                              | 3.776420006  | -0.896451767 | -2.097394015 |
|  | S485                              | 0.669153874  | -0.933315380 | 1.504408177  |
|  | S486                              | 4.460128006  | -4.466736208 | 2.690174306  |
|  | S487                              | 3.715726901  | 1.485091140  | 2.860335954  |
|  | S488                              | 5.775319663  | -3.421271795 | -0.639822297 |
|  | S489                              | 6.144953971  | -1.197618828 | 3.621070681  |
|  | S490                              | 6.369395214  | 0.508448449  | 0.339084946  |
|  | <b>6, 35(3/2)</b>                 |              |              |              |
|  | Fe1                               | 1.99         |              |              |
|  | Fe2                               | 0.07         |              |              |
|  | Fe3                               | -2.62        |              |              |
|  | Fe4                               | 2.60         |              |              |
|  | Fe5                               | -2.36        |              |              |
|  | Fe6                               | 1.09         |              |              |
|  | Fe7                               | 2.25         |              |              |
|  | <b>bm22b2n2x6x2n2nd35td.car_4</b> |              |              |              |
|  | C1                                | -6.953141736 | 2.544805521  | 5.970566790  |
|  | C2                                | -6.939564420 | 1.980792438  | 7.394011676  |
|  | C3                                | -8.302844872 | 3.023950578  | 3.976308168  |
|  | C4                                | -7.897268645 | 4.476355696  | 3.727886615  |
|  | C5                                | -7.701422703 | 6.741755183  | 4.624431406  |
|  | C6                                | -6.185654637 | 6.944075893  | 4.526714858  |
|  | C7                                | -3.969226087 | 6.079140633  | 5.112062087  |
|  | C8                                | -3.448779449 | 5.565092383  | 3.767106091  |
|  | C9                                | -3.701600994 | 3.970678797  | 1.941023805  |
|  | C10                               | -4.003579479 | 4.953876939  | 0.799326505  |
|  | C11                               | -5.437687642 | 6.698877849  | -0.090660863 |
|  | C12                               | -4.581117879 | 7.971166300  | -0.008489162 |
|  | C13                               | -3.818397062 | 9.818333194  | 1.409394190  |
|  | C14                               | -2.295960291 | 9.867584776  | 1.580173230  |
|  | C15                               | -0.288976603 | 8.740152866  | 2.453070087  |
|  | C16                               | 0.561999206  | 7.816068493  | 1.576406555  |
|  | C17                               | 0.472120432  | 6.095950921  | -0.225064157 |
|  | C18                               | 0.270960427  | 6.549296906  | -1.681235204 |
|  | C19                               | -0.035630140 | 4.658943652  | 0.045733579  |
|  | C20                               | 0.351328375  | 3.715614813  | -1.098512398 |
|  | C21                               | 0.463297840  | 4.160173695  | 1.406423650  |
|  | C22                               | -1.281992839 | 6.799631758  | -3.567456914 |
|  | C23                               | -1.227682272 | 8.315394628  | -3.827533987 |
|  | C24                               | -2.612129921 | 6.151491904  | -4.021319129 |
|  | C25                               | -2.972210583 | 6.569762246  | -5.451449301 |
|  | C26                               | -2.529059541 | 4.621644445  | -3.920030112 |
|  | C27                               | -1.878708861 | 10.541308109 | -3.119885652 |
|  | C28                               | -0.482984564 | 11.116000463 | -3.264113957 |
|  | C29                               | 7.284593868  | 7.759598246  | 8.302343942  |
|  | C30                               | 7.667149105  | 6.689313908  | 7.278523872  |
|  | C31                               | 7.564208437  | 6.164090620  | 4.839115138  |
|  | C32                               | 8.619273511  | 6.888969645  | 3.980994772  |
|  | C33                               | 6.264862999  | 5.912850995  | 4.055407564  |
|  | C34                               | 6.473828148  | 5.073919538  | 2.793546828  |
|  | C35                               | 5.144312944  | 4.574813470  | 2.228033423  |
|  | C36                               | 4.865410753  | 3.902900053  | -0.171372521 |

|     |               |              |               |
|-----|---------------|--------------|---------------|
| C37 | 10.775348704  | 6.684642624  | 2.839659839   |
| C38 | 10.843545832  | 6.183357954  | 1.413632665   |
| C39 | -4.735412081  | -0.714671391 | 3.802975717   |
| C40 | -5.371290921  | -0.828901431 | 2.408011354   |
| C41 | -3.202163599  | -0.633187931 | 3.605942577   |
| C42 | -2.375116502  | -0.209600355 | 4.836185443   |
| C43 | -1.926649084  | -1.356201160 | 5.740590508   |
| C44 | -6.282070272  | -2.432327369 | 0.786004764   |
| C45 | -7.658465914  | -1.889648429 | 0.380776076   |
| C46 | -6.206380175  | -3.954156593 | 0.544424338   |
| C47 | -9.483597488  | -0.358382835 | 0.934926723   |
| C48 | -9.135553153  | 0.991028130  | 0.288841572   |
| C49 | -7.388588902  | 2.647839597  | -0.207761960  |
| C50 | -6.470126753  | 2.564649637  | -1.426835574  |
| C51 | -5.113052400  | 1.169995481  | -2.926001464  |
| C52 | -5.842264441  | 1.378048833  | -4.277708610  |
| C53 | -4.509952508  | -0.241437088 | -2.999381242  |
| C54 | -3.663076646  | -0.696883599 | -1.853178704  |
| C55 | -2.935942664  | -0.055974800 | -0.879371552  |
| C56 | -2.587197469  | -2.241719830 | -0.651930800  |
| C57 | -7.932624536  | 0.878727392  | -5.503354592  |
| C58 | -8.097927781  | 2.260794488  | -6.128712061  |
| C59 | -9.305067241  | 0.278359056  | -5.121296451  |
| C60 | -10.082697681 | -0.362298567 | -6.233489839  |
| C61 | -10.262167681 | 0.018956779  | -7.549492224  |
| C62 | -11.370436467 | -1.853332748 | -7.128943304  |
| C63 | 8.433092425   | 3.245818179  | -4.077258520  |
| C64 | 9.536944678   | 3.509037928  | -3.068803825  |
| C65 | 7.117845303   | 3.157137165  | -3.270718928  |
| C66 | 5.894597024   | 2.966025404  | -4.137763828  |
| C67 | 5.193175205   | 4.064800986  | -4.669718438  |
| C68 | 5.412566150   | 1.676135271  | -4.425095478  |
| C69 | 4.046797393   | 3.885696752  | -5.453306906  |
| C70 | 4.278596894   | 1.481202589  | -5.215014307  |
| C71 | 3.593351132   | 2.588041307  | -5.724469834  |
| C72 | 4.516739954   | -3.354339105 | -7.205720344  |
| C73 | 3.325976566   | -4.043578907 | -7.882195925  |
| C74 | 4.059974957   | -2.640380768 | -5.920529348  |
| C75 | 2.208850647   | -6.183107272 | -8.348522093  |
| C76 | 0.875528547   | -6.101125297 | -7.603972597  |
| C77 | -0.290130104  | -5.417841444 | -5.536887951  |
| C78 | -0.926982411  | -4.029278318 | -5.754032266  |
| C79 | 0.045486699   | -5.700047769 | -4.061594844  |
| C80 | -1.099234730  | -5.610390845 | -3.047160634  |
| C81 | -2.164812214  | -6.720963666 | -3.091306670  |
| C82 | -3.796811997  | -7.032935767 | -4.963754646  |
| C83 | -0.629336260  | -1.647419867 | -6.186395663  |
| C84 | -0.999576970  | -1.397999113 | -7.662471555  |
| C85 | 0.299299857   | -0.511751146 | -5.737462890  |
| C86 | -0.253305630  | -1.642437324 | -9.977156431  |
| C87 | -1.122078515  | -2.357607259 | -11.007695606 |
| C88 | -2.768688946  | -4.133385203 | -11.453142798 |
| C89 | -4.153714552  | -3.559972371 | -11.824220978 |
| C90 | -2.897120285  | -5.577523149 | -10.918513816 |
| C91 | -3.668592514  | -5.629415645 | -9.605825095  |
| C92 | -5.926880392  | -1.964067431 | -11.238014452 |
| C93 | -6.079199654  | -1.256698505 | -12.580489417 |
| C94 | -6.235515180  | -0.979089223 | -10.078076348 |
| C95 | -6.257988949  | -1.668882409 | -8.732683642  |
| C96 | -7.408120259  | -2.352055108 | -8.307685420  |
| C97 | -5.125400070  | -1.697099811 | -7.902979927  |
| C98 | -7.425039171  | -3.066491248 | -7.107533592  |

|       |              |              |              |
|-------|--------------|--------------|--------------|
| C99   | -5.116594312 | -2.424298976 | -6.707206795 |
| C100  | -6.269795832 | -3.107490249 | -6.327461726 |
| C101  | 5.328935008  | -7.229189593 | 5.701372241  |
| C102  | 3.859484111  | -6.856118661 | 5.602184842  |
| C103  | 2.060766080  | -6.134131629 | 4.048452762  |
| C104  | 1.385156237  | -7.073835672 | 3.043547210  |
| C105  | 1.359064291  | -7.840642525 | 0.719287004  |
| C106  | 2.319821593  | -8.215695857 | -0.405724892 |
| C107  | 4.454043586  | -7.883979324 | -1.551073533 |
| C108  | 5.443590890  | -8.995719832 | -1.255817530 |
| C109  | -1.450879173 | -7.622237501 | 6.545788229  |
| C110  | -2.661393223 | -7.695437587 | 5.606336700  |
| C111  | -0.977661660 | -6.156066008 | 6.667700413  |
| C112  | -0.026117728 | -5.969763060 | 7.863921180  |
| C113  | 0.631083900  | -4.607698356 | 7.809973929  |
| C114  | -3.470731858 | -7.776889347 | 3.297859316  |
| C115  | -3.160280862 | -8.774100727 | 2.198269150  |
| C116  | -3.924164792 | -6.382397307 | 2.797726596  |
| C117  | -2.747018138 | -5.538704310 | 2.385754669  |
| C118  | -2.161525791 | -5.681152670 | 1.117262299  |
| C119  | -2.124827207 | -4.697522223 | 3.325600030  |
| C120  | -0.943686840 | -5.054587612 | 0.828413254  |
| C121  | -0.905916200 | -4.076066682 | 3.037860030  |
| C122  | -0.297376118 | -4.280363596 | 1.796481178  |
| C123  | 9.171363033  | -2.275314138 | 5.840958262  |
| C124  | 10.259094288 | -1.274131180 | 5.418986524  |
| C125  | 7.913437838  | -1.580079308 | 6.388370398  |
| C126  | 6.732180957  | -2.467434696 | 6.634533906  |
| C127  | 6.602521559  | -3.447081587 | 7.598420931  |
| C128  | 4.671413638  | -3.187236976 | 6.546922686  |
| C129  | 11.533631857 | 0.746278858  | 5.874888976  |
| C130  | 12.866240429 | 0.084059133  | 5.604428845  |
| C131  | 1.748733764  | 2.142585124  | 6.575851981  |
| C132  | 3.109029158  | 2.262981574  | 5.947634517  |
| C133  | 4.116021170  | 1.130888605  | 6.409139545  |
| C134  | 4.233512800  | 1.141420797  | 7.959637292  |
| C135  | 5.324613562  | 0.187423451  | 8.474330191  |
| C136  | 5.650108046  | 0.379076239  | 9.928102271  |
| C137  | 5.512873615  | 1.534287405  | 5.840758816  |
| C138  | 3.828856170  | -1.764359907 | 0.727741736  |
| Fe139 | 4.329704083  | -2.887546494 | 2.329043251  |
| Fe140 | 2.159051124  | -1.144063807 | -0.605025995 |
| Fe141 | 5.012682554  | -1.375421698 | -0.829500191 |
| Fe142 | 3.959084138  | -3.581842109 | -0.081910511 |
| Fe143 | 3.796458341  | -2.992607893 | -2.617370229 |
| Fe144 | 5.181118050  | -0.598456363 | 1.585158261  |
| Fe145 | 2.705773842  | -0.883032915 | 2.364660325  |
| H146  | -4.971794658 | 2.364747449  | 7.773810520  |
| H147  | -5.266962185 | 0.805818149  | 7.388550452  |
| H148  | -8.962493274 | 2.135386183  | 5.805944585  |
| H149  | -7.621739179 | 1.117863211  | 7.447885468  |
| H150  | -7.379739804 | 2.756927564  | 8.043989754  |
| H151  | -7.678973173 | 2.414172801  | 3.307947656  |
| H152  | -8.524659298 | 5.011338544  | 5.606380366  |
| H153  | -9.352120278 | 2.896938831  | 3.677338307  |
| H154  | -8.073997325 | 7.286841235  | 5.501131047  |
| H155  | -5.859585682 | 5.245108617  | 5.636284752  |
| H156  | -8.142323269 | 7.192365826  | 3.725611883  |
| H157  | -2.622809249 | 3.768308158  | 1.898756865  |
| H158  | -4.786961447 | 3.988590064  | 3.803643186  |
| H159  | -3.557571266 | 5.463208255  | 5.923234365  |
| H160  | -5.288389646 | 6.268379792  | -1.088546172 |



|      |              |              |              |
|------|--------------|--------------|--------------|
| H161 | -5.783944702 | 5.531817554  | 1.686049870  |
| H162 | -3.596271527 | 7.103030156  | 5.231767851  |
| H163 | -4.234366142 | 3.023669412  | 1.770420409  |
| H164 | -4.907485164 | 8.093217581  | 2.032463923  |
| H165 | -6.494233330 | 6.980759086  | 0.018486070  |
| H166 | 0.130691349  | 4.824005040  | 2.218142788  |
| H167 | 0.069589337  | 3.152309985  | 1.610912966  |
| H168 | 1.560924948  | 4.095879805  | 1.433352176  |
| H169 | -1.135472932 | 4.701000332  | 0.086153480  |
| H170 | -4.263662113 | 10.282460788 | 2.301433363  |
| H171 | -2.365716606 | 4.276958958  | -2.889301554 |
| H172 | -2.435589723 | 8.705500088  | -2.179549669 |
| H173 | -3.100132968 | 7.657281612  | -5.544971541 |
| H174 | 0.044016619  | 2.687226756  | -0.861304909 |
| H175 | 1.437526493  | 3.704632138  | -1.260704076 |
| H176 | 8.369373089  | 4.135416121  | -4.734768568 |
| H177 | -3.466304198 | 4.168185834  | -4.275173037 |
| H178 | -3.913098699 | 6.087116174  | -5.754910887 |
| H179 | -1.705675292 | 4.241381904  | -4.546612571 |
| H180 | -2.186405739 | 6.257677435  | -6.157386680 |
| H181 | -3.409479861 | 6.506856441  | -3.343851464 |
| H182 | -0.459812162 | 6.387885914  | -4.173429526 |
| H183 | -1.747777552 | 6.084054260  | -1.594239836 |
| H184 | -0.132576039 | 4.000762208  | -2.043106069 |
| H185 | 0.672173215  | -0.735186712 | -4.725542399 |
| H186 | -0.312658364 | 0.403196498  | -5.691388552 |
| H187 | 1.711970957  | 0.557421989  | -6.576361595 |
| H188 | 2.054744587  | 3.182817923  | -6.751889359 |
| H189 | 3.902855676  | 0.474820127  | -5.401864656 |
| H190 | 5.902757449  | 0.804422691  | -3.987219411 |
| H191 | 5.536879419  | 5.081099413  | -4.459776099 |
| H192 | -1.144217160 | 7.152958278  | 0.695311321  |
| H193 | -0.136791143 | 8.427770926  | 3.496978901  |
| H194 | 0.112083791  | 9.755777842  | 2.341749616  |
| H195 | -2.285572000 | 8.007090136  | 2.507223331  |
| H196 | -4.051314621 | 10.450509717 | 0.543001626  |
| H197 | 3.499310826  | 4.750381889  | -5.837565633 |
| H198 | 1.555465281  | 6.142354385  | -0.050808725 |
| H199 | -2.481787320 | 10.847526987 | -3.990358194 |
| H200 | -2.326746117 | 10.997874302 | -2.223219245 |
| H201 | 0.321967537  | 10.523076337 | -2.770603279 |
| H202 | 11.740259115 | 6.502194518  | 3.336180928  |
| H203 | -0.367373714 | -1.966269153 | 6.920875413  |
| H204 | 2.330690865  | 3.422800902  | 7.896782297  |
| H205 | -0.601267742 | -6.035220782 | 8.798949604  |
| H206 | 0.736942037  | -6.761910295 | 7.870518887  |
| H207 | -1.843197558 | -5.487827987 | 6.795636980  |
| H208 | -2.525516308 | -9.631059825 | 2.525104720  |
| H209 | -1.865236199 | -7.919922938 | 7.521222290  |
| H210 | -2.847709596 | -1.609504395 | 3.236143920  |
| H211 | -2.952061352 | 0.494874342  | 5.460532699  |
| H212 | -1.421511499 | -7.723123242 | 3.941407890  |
| H213 | -4.332477716 | -8.229166266 | 3.830541246  |
| H214 | 0.102034709  | -8.330871916 | 5.362311000  |
| H215 | -0.096087350 | -0.433788740 | 6.094921953  |
| H216 | -0.488269977 | -5.858763902 | 5.727538893  |
| H217 | 0.233727730  | -8.720265117 | 6.959224476  |
| H218 | -5.905766608 | -1.604755533 | 5.253179869  |
| H219 | -3.021457046 | 0.102066439  | 2.807967101  |
| H220 | 2.244506764  | -5.472404497 | 7.087215972  |
| H221 | -1.491069081 | 0.348991380  | 4.496210083  |
| H222 | -4.322505468 | 1.933087457  | -2.883729277 |

|      |               |              |               |
|------|---------------|--------------|---------------|
| H223 | -2.815469060  | 0.996346725  | -0.650128267  |
| H224 | -8.280466334  | 3.205061874  | -0.521795725  |
| H225 | -7.145063367  | 0.829028682  | 0.886855798   |
| H226 | -7.575134149  | 0.730975135  | -3.395934470  |
| H227 | -9.879798775  | 0.852248430  | -8.129570729  |
| H228 | -8.190510660  | 3.089106761  | -5.384559480  |
| H229 | -9.907955560  | 1.049784995  | -4.610415893  |
| H230 | -7.419696809  | 0.227847974  | -6.229561815  |
| H231 | -12.004386779 | -2.718256395 | -7.303935559  |
| H232 | -3.900052137  | -0.275212894 | -3.916680557  |
| H233 | -5.327481261  | -0.967111561 | -3.142961553  |
| H234 | -11.404630507 | -0.968585053 | -9.064820050  |
| H235 | -9.122361370  | -0.511938750 | -4.376688689  |
| H236 | -6.172462051  | 0.539291605  | -1.157689028  |
| H237 | -6.884547949  | 3.260818069  | 0.554205104   |
| H238 | -10.109676732 | -0.901187525 | 0.215395267   |
| H239 | -2.205780097  | -3.189799261 | -0.281323870  |
| H240 | -10.089587362 | -0.167904206 | 1.830316784   |
| H241 | 9.435787284   | 2.141381712  | -5.481533733  |
| H242 | 7.870495068   | 1.706139715  | -5.302119224  |
| H243 | 0.915872641   | -3.084637775 | -5.688068209  |
| H244 | -1.568857586  | -1.557575483 | -5.623118220  |
| H245 | 0.509470493   | -2.642533714 | -8.281114165  |
| H246 | -3.873529505  | -2.825417568 | -2.247026880  |
| H247 | -5.405891467  | -4.254058879 | -2.201893818  |
| H248 | -5.339943107  | -3.811507330 | -3.731076012  |
| H249 | -5.190506621  | -4.306429490 | 0.767734496   |
| H250 | -6.916377437  | -4.476928835 | 1.206867238   |
| H251 | -1.885969511  | -5.996230599 | -10.810085603 |
| H252 | -3.444381940  | -6.165808217 | -11.666234751 |
| H253 | -1.903971650  | -5.865815175 | -8.471554617  |
| H254 | -3.383575247  | -5.592072805 | -7.583559189  |
| H255 | -3.657000254  | -8.686118395 | -6.164809323  |
| H256 | -2.526395241  | -6.930714621 | -2.073878732  |
| H257 | -8.333997270  | -3.580879668 | -6.784131428  |
| H258 | -4.219098855  | -1.150994379 | -8.179532188  |
| H259 | -5.146191279  | -5.564515794 | -5.492855286  |
| H260 | 0.828662853   | -4.995841953 | -3.738291573  |
| H261 | 1.795801932   | -5.239014250 | -5.967664967  |
| H262 | -1.590269023  | -4.625514105 | -3.097030787  |
| H263 | -7.951012419  | -1.115035826 | 2.236915099   |
| H264 | 2.514024037   | -7.237913445 | -8.375240412  |
| H265 | -5.757404456  | -2.727342733 | 2.907829365   |
| H266 | 0.490102095   | -6.708078758 | -4.017366608  |
| H267 | -4.207781895  | -2.487843531 | -6.106136298  |
| H268 | -7.228281104  | -3.657801411 | -1.088826417  |
| H269 | 2.008592081   | -5.863289952 | -9.380520669  |
| H270 | -2.793452503  | -8.809324794 | -4.670344988  |
| H271 | -5.329643461  | -7.071512968 | -6.314437968  |
| H272 | -4.321870875  | -2.141468448 | 5.226049538   |
| H273 | -5.072678068  | 0.259206579  | 4.204166671   |
| H274 | -8.310982267  | -2.329913224 | -8.922317082  |
| H275 | -5.595508286  | -1.950510096 | 0.068950174   |
| H276 | -1.040643250  | -6.132776702 | -5.899635067  |
| H277 | -1.716362103  | -7.652724159 | -3.458582632  |
| H278 | -0.623285552  | -5.658047193 | -2.058753034  |
| H279 | -3.848505396  | -5.521548840 | -3.613516524  |
| H280 | -0.543781286  | -0.581443746 | -10.007124492 |
| H281 | -1.931175531  | -3.557171497 | -9.552333368  |
| H282 | -2.214932716  | -4.169277899 | -12.403040951 |
| H283 | 0.782612652   | -1.719045767 | -10.333440279 |
| H284 | -3.990163820  | -2.175374944 | -10.333922874 |

|      |              |              |              |
|------|--------------|--------------|--------------|
| H285 | 5.675384571  | -7.643741546 | 4.743619522  |
| H286 | 5.871866541  | -6.273523777 | 5.856699208  |
| H287 | 8.903189958  | -2.817269182 | 4.922657307  |
| H288 | 6.529147936  | -8.279390591 | 6.972788450  |
| H289 | 5.078869042  | -7.870562942 | 7.617337541  |
| H290 | 4.944120917  | -2.187935981 | -5.453240662 |
| H291 | 4.435707564  | -1.768646145 | -8.489250648 |
| H292 | 4.012293495  | -5.869681348 | -7.242731258 |
| H293 | 3.352084476  | -1.841857158 | -6.188432750 |
| H294 | 5.562776992  | -2.876039043 | -8.902748282 |
| H295 | 5.008409070  | -6.965685697 | -1.797221976 |
| H296 | 5.268266520  | -4.111605258 | -6.934608166 |
| H297 | 5.808086677  | 6.883451253  | 3.798241754  |
| H298 | 7.965170535  | 5.204701512  | 5.187678019  |
| H299 | 3.799338228  | -6.872090081 | 0.199332528  |
| H300 | 4.664123159  | 3.052583330  | -2.024575718 |
| H301 | 1.000707386  | -8.777702622 | 1.165737531  |
| H302 | -0.421088608 | -3.440394380 | 3.783166261  |
| H303 | 0.483567477  | -7.372774938 | 0.238286887  |
| H304 | 4.485379524  | 5.410859160  | 1.957177807  |
| H305 | 2.541830966  | -6.227573550 | 1.593355614  |
| H306 | 4.611497049  | 3.982000198  | 2.989056674  |
| H307 | 5.574020302  | 5.394307619  | 4.739933255  |
| H308 | 7.095266179  | 4.194534643  | 3.020198221  |
| H309 | 6.999861277  | 5.659758577  | 2.022437495  |
| H310 | -4.477226532 | -5.898377384 | 3.615657582  |
| H311 | 6.870317835  | 7.903725152  | 5.904063225  |
| H312 | 6.461849335  | 7.332874440  | 8.896531614  |
| H313 | 0.673422841  | -3.838840714 | 1.572768939  |
| H314 | 7.628584881  | 9.653074932  | 7.566731558  |
| H315 | 6.176449748  | 9.493738357  | 8.308066271  |
| H316 | 5.717375495  | 2.776176357  | 1.258152875  |
| H317 | -0.467054432 | -5.175809978 | -0.145671769 |
| H318 | -2.588609164 | -4.541855132 | 4.302420218  |
| H319 | 9.191322817  | 2.050029753  | 8.312854210  |
| H320 | 8.173467198  | -1.087660790 | 7.342541381  |
| H321 | 7.727995072  | 2.773661802  | 6.520375061  |
| H322 | 8.640704673  | 1.207833478  | 9.485823400  |
| H323 | 5.277399794  | -9.537949986 | -0.293120012 |
| H324 | 7.172477362  | 1.413276831  | 3.764416073  |
| H325 | 3.557579633  | 3.245448782  | 6.159195172  |
| H326 | 4.091154378  | -6.493128254 | 3.598189739  |
| H327 | 4.465229714  | 2.168017512  | 8.283732424  |
| H328 | 4.866169081  | -4.592784232 | 8.115787216  |
| H329 | 3.625755742  | -3.313652059 | 6.294158240  |
| H330 | 8.146072371  | 7.862022177  | 8.985157662  |
| H331 | 5.310987411  | 1.975415816  | -0.779532439 |
| H332 | 9.157755748  | 2.770351909  | 3.720479362  |
| H333 | 7.698121569  | 1.122773750  | 2.333010793  |
| H334 | 9.707015089  | 5.115648325  | 3.862742859  |
| H335 | 4.537028317  | 5.922877469  | -0.017415327 |
| H336 | 4.893507955  | 0.322470036  | 11.661268304 |
| H337 | 4.997345615  | -0.850930045 | 8.314662104  |
| H338 | 6.261611805  | 0.335343001  | 7.925988672  |
| H339 | 3.264503126  | 0.849567292  | 8.390666735  |
| H340 | 2.108016464  | -5.107090698 | 3.653279351  |
| H341 | -2.645087920 | -6.320816045 | 0.374263988  |
| H342 | -4.622341072 | -6.549053571 | 1.962993862  |
| H343 | 2.998907307  | 2.143257023  | 4.861717554  |
| H344 | 9.466226181  | 3.201069811  | 5.178479151  |
| H345 | 8.558597248  | 3.960406462  | 7.090772047  |
| H346 | 4.046079960  | 5.220276407  | -1.496477530 |

|       |               |              |               |
|-------|---------------|--------------|---------------|
| H347  | 7.314679666   | -3.850414191 | 8.308328258   |
| H348  | 7.609509194   | -0.785482815 | 5.695752171   |
| H349  | 1.474575721   | -6.143332875 | 4.969459636   |
| H350  | 3.879140969   | -8.177675760 | -2.444132248  |
| H351  | 7.025787637   | 4.085050515  | -2.687493279  |
| H352  | 7.206958401   | 2.321443891  | -2.558508553  |
| H353  | 10.489350557  | -3.758117771 | 6.363402036   |
| H354  | 10.097700209  | -2.776016016 | 7.611512017   |
| H355  | 11.676859769  | 1.424189566  | 6.731117433   |
| H356  | 9.931818993   | -0.011907323 | 7.058917663   |
| H357  | 13.029429738  | -0.883891118 | 6.135549514   |
| H358  | 11.241081572  | 1.363148222  | 5.009609490   |
| H359  | 9.972018515   | 2.587571153  | -2.611454627  |
| H360  | -5.124028404  | -0.934313425 | -13.058882827 |
| H361  | 10.619145978  | 7.776790019  | 2.789389507   |
| H362  | 9.871990395   | 5.846256850  | 0.978384638   |
| H363  | -6.663690609  | -2.783128103 | -11.218425892 |
| H364  | -5.488618396  | -0.169848117 | -10.084138594 |
| H365  | -7.213460996  | -0.522681547 | -10.289531693 |
| H366  | 1.788069251   | 0.007026316  | 3.179330324   |
| H367  | -7.130312382  | -4.201890030 | -4.962910508  |
| H368  | 0.323664149   | 0.105464181  | 1.274265550   |
| H369  | -1.550434380  | -0.910561989 | 0.558736753   |
| Mo370 | 4.634351029   | -0.906005506 | 4.233383801   |
| N371  | 2.460960999   | 1.750662845  | -0.109203702  |
| N372  | 2.357656176   | 0.646418026  | -0.281711685  |
| N373  | -5.637235296  | 1.600092893  | 7.916293763   |
| N374  | -8.168764785  | 2.586320659  | 5.358136493   |
| N375  | -8.097936562  | 5.347684064  | 4.746231013   |
| N376  | -5.419737750  | 6.062252454  | 5.215158012   |
| N377  | -4.073109486  | 4.472226667  | 3.256903679   |
| N378  | -5.121063583  | 5.710395011  | 0.928274043   |
| N379  | -4.425260012  | 8.508717958  | 1.230912084   |
| N380  | -1.709752965  | 8.775806454  | 2.149426765   |
| N381  | -0.130626461  | 7.061225824  | 0.686197921   |
| N382  | -1.004607457  | 6.492350902  | -2.163525459  |
| N383  | -1.864875536  | 9.104780822  | -2.927331403  |
| N384  | 6.837969022   | 9.017829244  | 7.693425380   |
| N385  | 7.291694962   | 6.975000153  | 6.017313856   |
| N386  | 5.340265971   | 3.708275606  | 1.064803400   |
| N387  | 4.280814846   | 5.077622307  | -0.518416944  |
| N388  | 4.931900092   | 2.908698389  | -1.055848922  |
| N389  | 9.674275597   | 6.124847752  | 3.600943821   |
| N390  | -5.126818706  | -1.852473767 | 4.639665418   |
| N391  | -0.704909248  | -1.230678226 | 6.291611825   |
| N392  | -5.854707759  | -2.065603836 | 2.120015198   |
| N393  | -8.337721537  | -1.170622882 | 1.297721043   |
| N394  | -7.830132664  | 1.387680849  | 0.364181675   |
| N395  | -6.004006331  | 1.325532398  | -1.780273819  |
| N396  | -3.429995366  | -2.055811963 | -1.675832050  |
| N397  | -2.289940428  | -1.037670984 | -0.152031135  |
| N398  | -7.143123377  | 0.987342090  | -4.280950656  |
| N399  | -10.779854908 | -1.533088786 | -5.983222496  |
| N400  | -11.080244630 | -0.944486576 | -8.101830060  |
| N401  | 8.704570732   | 1.992058867  | -4.781965232  |
| N402  | 5.161785854   | -2.380149673 | -8.100732325  |
| N403  | 3.292764514   | -5.401870465 | -7.787583152  |
| N404  | 0.910544500   | -5.618107478 | -6.342975258  |
| N405  | -3.337149886  | -6.373862496 | -3.902735697  |
| N406  | -3.302754537  | -8.230959983 | -5.329461524  |
| N407  | -4.737813341  | -6.464220109 | -5.754137735  |
| N408  | -0.081909048  | -2.976646868 | -5.928497356  |

|      |               |              |               |
|------|---------------|--------------|---------------|
| N409 | -0.307302587  | -2.110622472 | -8.598769698  |
| N410 | -1.997350972  | -3.296376142 | -10.537837084 |
| N411 | -2.901349402  | -5.617099985 | -8.481632828  |
| N412 | -4.588469837  | -2.511589312 | -11.084225568 |
| N413 | 5.529918280   | -8.217281581 | 6.765737058   |
| N414 | 3.411710920   | -6.582200673 | 4.362466218   |
| N415 | 1.867719202   | -6.997580962 | 1.787123229   |
| N416 | 3.538700213   | -7.620936052 | -0.455274963  |
| N417 | -0.432784375  | -8.618879171 | 6.190917191   |
| N418 | -2.392559223  | -7.755094336 | 4.271439064   |
| N419 | 9.705686077   | -3.263197573 | 6.799171434   |
| N420 | 5.509313513   | -2.324820511 | 5.979993035   |
| N421 | 5.298363086   | -3.887222320 | 7.525573020   |
| N422 | 10.506900543  | -0.216516394 | 6.241881134   |
| N423 | -0.163817174  | -0.933386304 | -2.436620630  |
| N424 | 0.737336206   | -0.981130713 | -1.761694581  |
| O425 | -5.928752112  | 2.986535845  | 5.415901965   |
| O426 | -7.416422110  | 4.817501481  | 2.634927579   |
| O427 | -5.713587181  | 7.889131759  | 3.873285584   |
| O428 | -2.513984507  | 6.126286658  | 3.174741939   |
| O429 | -3.254816546  | 5.039669363  | -0.186087272  |
| O430 | -4.105509618  | 8.489887383  | -1.032496145  |
| O431 | -1.677824130  | 10.886354977 | 1.245114840   |
| O432 | 1.792297726   | 7.783337238  | 1.723331744   |
| O433 | 1.222455108   | 6.940611035  | -2.371879364  |
| O434 | -0.632107036  | 8.789953389  | -4.808810086  |
| O435 | -0.251072606  | 12.180262205 | -3.817243134  |
| O436 | 8.252786804   | 5.651101599  | 7.652320682   |
| O437 | 8.481107081   | 8.088768760  | 3.683194312   |
| O438 | 11.875338932  | 6.161003872  | 0.761371814   |
| O439 | -5.420920296  | 0.128149576  | 1.606198387   |
| O440 | -2.661242340  | -2.345409555 | 5.964461554   |
| O441 | -8.068835902  | -2.074213570 | -0.784907671  |
| O442 | -6.490698807  | -4.268997648 | -0.828223824  |
| O443 | -10.029377508 | 1.652314100  | -0.251053141  |
| O444 | -6.183349313  | 3.584121490  | -2.058004773  |
| O445 | -5.237568773  | 1.762008429  | -5.281948712  |
| O446 | -8.158945020  | 2.469970326  | -7.327977624  |
| O447 | 9.912993327   | 4.624838414  | -2.738880080  |
| O448 | 2.458944129   | 2.340675317  | -6.472507859  |
| O449 | 2.442644829   | -3.405333144 | -8.484236231  |
| O450 | -0.158623654  | -6.510877898 | -8.171265905  |
| O451 | -2.164576891  | -3.915336927 | -5.780992875  |
| O452 | -1.852778322  | -0.546894970 | -7.949291485  |
| O453 | 1.376285255   | -0.358371032 | -6.665930948  |
| O454 | -1.030405892  | -2.057024964 | -12.204451680 |
| O455 | -4.808605182  | -4.046692867 | -12.756546360 |
| O456 | -4.908888157  | -5.596939522 | -9.575088824  |
| O457 | -7.164694240  | -1.024525334 | -13.087195734 |
| O458 | -6.229677789  | -3.871079753 | -5.146192994  |
| O459 | 3.148740223   | -6.787642473 | 6.637968715   |
| O460 | 0.471622895   | -7.858226542 | 3.383957032   |
| O461 | 1.935697098   | -9.040521213 | -1.252083177  |
| O462 | 6.360925736   | -9.289580338 | -2.005505349  |
| O463 | -3.823590374  | -7.671918508 | 6.046423486   |
| O464 | 0.054470522   | -3.571153046 | 8.129197790   |
| O465 | 1.891602734   | -4.562063740 | 7.341643920   |
| O466 | -3.590678316  | -8.704854945 | 1.056052572   |
| O467 | 10.955466723  | -1.463206599 | 4.404456427   |
| O468 | 13.744253024  | 0.592481767  | 4.921536847   |
| O469 | 0.835914347   | 1.430581075  | 6.182795178   |
| O470 | 1.529813257   | 2.899738090  | 7.700521703   |

|                   |                                    |              |              |              |
|-------------------|------------------------------------|--------------|--------------|--------------|
|                   | O471                               | 6.748810118  | 0.696095265  | 10.378971622 |
|                   | O472                               | 4.583455674  | 0.165025027  | 10.743806732 |
|                   | O473                               | 6.040409878  | 0.691843093  | 5.015539843  |
|                   | O474                               | 6.062700658  | 2.592279663  | 6.229403085  |
|                   | O475                               | 3.713058323  | -0.099675939 | 5.937361289  |
|                   | O476                               | 9.775234319  | 3.340840485  | 4.244219545  |
|                   | O477                               | 7.737415213  | 1.792862261  | 3.043392602  |
|                   | O478                               | -4.781088342 | -4.084107795 | -2.961448634 |
|                   | O479                               | 9.483821049  | 1.472230710  | 9.063343311  |
|                   | O480                               | 8.661161050  | 3.022013450  | 6.788398454  |
|                   | S481                               | 3.220741036  | -3.766000969 | -4.702044250 |
|                   | S482                               | 2.030826802  | -3.462640557 | -1.257065534 |
|                   | S483                               | 2.819320472  | -2.424853372 | 3.931302166  |
|                   | S484                               | 3.642360918  | -0.776922491 | -2.471978756 |
|                   | S485                               | 0.719230929  | -1.196781191 | 1.260646188  |
|                   | S486                               | 4.425299149  | -4.995412869 | 1.601515789  |
|                   | S487                               | 3.975359368  | 0.875045273  | 2.755111722  |
|                   | S488                               | 5.698568234  | -3.429475762 | -1.545287498 |
|                   | S489                               | 6.310810098  | -1.976598863 | 2.922474053  |
|                   | S490                               | 6.413811359  | 0.195475318  | -0.083134277 |
| <b>6, 35(5/2)</b> | <b>bm22b2n2x6x2n2nd35tde.car_3</b> |              |              |              |
| Fe1               | 3.25                               | C1           | -6.956215847 | 2.545659748  |
| Fe2               | 0.09                               | C2           | -6.941600193 | 1.980519890  |
| Fe3               | -2.66                              | C3           | -8.303851152 | 3.024103059  |
| Fe4               | 2.90                               | C4           | -7.898247233 | 4.475838292  |
| Fe5               | -2.37                              | C5           | -7.702126348 | 6.740844189  |
| Fe6               | 1.14                               | C6           | -6.185873523 | 6.943404494  |
| Fe7               | 2.22                               | C7           | -3.969580671 | 6.078429521  |
|                   |                                    | C8           | -3.448996085 | 5.564311564  |
|                   |                                    | C9           | -3.702182711 | 3.969652756  |
|                   |                                    | C10          | -4.004400670 | 4.953162545  |
|                   |                                    | C11          | -5.438118924 | 6.698406020  |
|                   |                                    | C12          | -4.581312328 | 7.970335854  |
|                   |                                    | C13          | -3.818428023 | 9.817218731  |
|                   |                                    | C14          | -2.295891928 | 9.867072751  |
|                   |                                    | C15          | -0.288955522 | 8.739362140  |
|                   |                                    | C16          | 0.561660231  | 7.815301010  |
|                   |                                    | C17          | 0.470557675  | 6.096147043  |
|                   |                                    | C18          | 0.269009035  | 6.550203771  |
|                   |                                    | C19          | -0.037190565 | 4.658277975  |
|                   |                                    | C20          | 0.348184531  | 3.714399906  |
|                   |                                    | C21          | 0.462066967  | 4.159278936  |
|                   |                                    | C22          | -1.283250650 | 6.799893908  |
|                   |                                    | C23          | -1.228940963 | 8.315079387  |
|                   |                                    | C24          | -2.613267455 | 6.151974064  |
|                   |                                    | C25          | -2.973012999 | 6.569544884  |
|                   |                                    | C26          | -2.530188504 | 4.621833599  |
|                   |                                    | C27          | -1.878874874 | 10.541157550 |
|                   |                                    | C28          | -0.483107984 | 11.115607201 |
|                   |                                    | C29          | 7.287760648  | 7.762007029  |
|                   |                                    | C30          | 7.668814584  | 6.691035120  |
|                   |                                    | C31          | 7.565161868  | 6.164641446  |
|                   |                                    | C32          | 8.619775210  | 6.889213782  |
|                   |                                    | C33          | 6.266104804  | 5.913202699  |
|                   |                                    | C34          | 6.474700264  | 5.074436527  |
|                   |                                    | C35          | 5.145115803  | 4.575255681  |
|                   |                                    | C36          | 4.870758860  | 3.900782292  |
|                   |                                    | C37          | 10.775854041 | 6.685249828  |
|                   |                                    | C38          | 10.844243672 | 6.183603279  |
|                   |                                    | C39          | -4.738046273 | -0.714915122 |
|                   |                                    | C40          | -5.373397926 | -0.829226502 |

|      |               |              |               |
|------|---------------|--------------|---------------|
| C41  | -3.204623718  | -0.633406191 | 3.607601380   |
| C42  | -2.376772053  | -0.209827591 | 4.837051118   |
| C43  | -1.928220757  | -1.356591562 | 5.741718469   |
| C44  | -6.281833292  | -2.432863418 | 0.786049806   |
| C45  | -7.658169915  | -1.890376056 | 0.380647075   |
| C46  | -6.206023967  | -3.954366367 | 0.544579618   |
| C47  | -9.483509066  | -0.359445503 | 0.934839747   |
| C48  | -9.135533259  | 0.990523888  | 0.288889434   |
| C49  | -7.388938750  | 2.646785806  | -0.207431831  |
| C50  | -6.469762435  | 2.563477479  | -1.426541003  |
| C51  | -5.113154837  | 1.168606383  | -2.925056692  |
| C52  | -5.841599645  | 1.376384679  | -4.277039943  |
| C53  | -4.510214268  | -0.243605911 | -2.997765277  |
| C54  | -3.662644238  | -0.698925844 | -1.851956146  |
| C55  | -2.932663862  | -0.057973144 | -0.880101087  |
| C56  | -2.581693121  | -2.243988582 | -0.655073443  |
| C57  | -7.931609251  | 0.877372467  | -5.503314838  |
| C58  | -8.097286496  | 2.259710872  | -6.128722985  |
| C59  | -9.304036777  | 0.277592117  | -5.121721488  |
| C60  | -10.082343624 | -0.362868685 | -6.233923036  |
| C61  | -10.262182500 | 0.018350888  | -7.549898659  |
| C62  | -11.370635601 | -1.853693663 | -7.129135849  |
| C63  | 8.433286966   | 3.241356014  | -4.076227681  |
| C64  | 9.537405346   | 3.505233161  | -3.068049424  |
| C65  | 7.117762145   | 3.155281940  | -3.271250285  |
| C66  | 5.895507718   | 2.966186896  | -4.140248797  |
| C67  | 5.192578972   | 4.065401036  | -4.669942840  |
| C68  | 5.416880307   | 1.676377022  | -4.433569446  |
| C69  | 4.046235881   | 3.886290764  | -5.453945011  |
| C70  | 4.282971663   | 1.481696162  | -5.223486667  |
| C71  | 3.594362542   | 2.588661904  | -5.727776000  |
| C72  | 4.519448264   | -3.346673892 | -7.243012532  |
| C73  | 3.324787810   | -4.042451604 | -7.908039727  |
| C74  | 4.061184777   | -2.619519190 | -5.969632564  |
| C75  | 2.205716821   | -6.184618150 | -8.355626192  |
| C76  | 0.874123947   | -6.102757000 | -7.608382523  |
| C77  | -0.288686347  | -5.418305786 | -5.539451525  |
| C78  | -0.927443976  | -4.030470382 | -5.755703581  |
| C79  | 0.047549031   | -5.699336696 | -4.062797365  |
| C80  | -1.097244291  | -5.610427914 | -3.049204078  |
| C81  | -2.162719113  | -6.721175964 | -3.091868997  |
| C82  | -3.795775184  | -7.033930392 | -4.963506526  |
| C83  | -0.630815231  | -1.648367366 | -6.189783411  |
| C84  | -1.000129006  | -1.397122581 | -7.665512705  |
| C85  | 0.297928254   | -0.513578615 | -5.739128996  |
| C86  | -0.253385580  | -1.642177430 | -9.980218335  |
| C87  | -1.122374196  | -2.358470614 | -11.009511554 |
| C88  | -2.767954979  | -4.134444844 | -11.453427206 |
| C89  | -4.152787405  | -3.560451084 | -11.823443414 |
| C90  | -2.896881199  | -5.578596477 | -10.918696280 |
| C91  | -3.669077869  | -5.630331265 | -9.605730990  |
| C92  | -5.924770977  | -1.964735733 | -11.235356589 |
| C93  | -6.077263755  | -1.258183873 | -12.578211531 |
| C94  | -6.234650598  | -0.979627998 | -10.076529265 |
| C95  | -6.258074087  | -1.669027408 | -8.730724238  |
| C96  | -7.407913975  | -2.353236093 | -8.306598083  |
| C97  | -5.125188596  | -1.697635610 | -7.901545235  |
| C98  | -7.424935160  | -3.067811184 | -7.106733925  |
| C99  | -5.116595567  | -2.425097293 | -6.706038976  |
| C100 | -6.269838064  | -3.108839938 | -6.326841840  |
| C101 | 5.327050012   | -7.231033461 | 5.703739696   |
| C102 | 3.856977627   | -6.858890645 | 5.605954820   |

|       |              |              |              |
|-------|--------------|--------------|--------------|
| C103  | 2.057849242  | -6.136377405 | 4.053615951  |
| C104  | 1.383699011  | -7.075100837 | 3.046153035  |
| C105  | 1.359757241  | -7.836798372 | 0.720324299  |
| C106  | 2.321251190  | -8.211139944 | -0.402694079 |
| C107  | 4.455645709  | -7.881977238 | -1.547398624 |
| C108  | 5.443435445  | -8.994873893 | -1.254258679 |
| C109  | -1.451788948 | -7.625075291 | 6.547568586  |
| C110  | -2.661952114 | -7.697710216 | 5.607356553  |
| C111  | -0.979011645 | -6.158868551 | 6.668870140  |
| C112  | -0.026025145 | -5.971009664 | 7.864299531  |
| C113  | 0.631438969  | -4.609062350 | 7.809385324  |
| C114  | -3.470884402 | -7.778826669 | 3.299391513  |
| C115  | -3.160247461 | -8.775149765 | 2.198858734  |
| C116  | -3.925590749 | -6.384086528 | 2.800238652  |
| C117  | -2.749092000 | -5.539597152 | 2.389137576  |
| C118  | -2.163826887 | -5.680913271 | 1.120197812  |
| C119  | -2.127742872 | -4.696874857 | 3.328532947  |
| C120  | -0.948039578 | -5.050733917 | 0.830787210  |
| C121  | -0.910558798 | -4.072082454 | 3.039859075  |
| C122  | -0.303330099 | -4.274619412 | 1.798056326  |
| C123  | 9.170207481  | -2.274263671 | 5.841377504  |
| C124  | 10.259157994 | -1.274446254 | 5.420199754  |
| C125  | 7.913227962  | -1.579054049 | 6.389340046  |
| C126  | 6.731852923  | -2.465693686 | 6.636765213  |
| C127  | 6.603181294  | -3.448000493 | 7.597932442  |
| C128  | 4.670441671  | -3.184289898 | 6.549895907  |
| C129  | 11.535308789 | 0.745260499  | 5.876874251  |
| C130  | 12.867500614 | 0.082537150  | 5.605234071  |
| C131  | 1.748557347  | 2.144637888  | 6.576223907  |
| C132  | 3.109328736  | 2.268570319  | 5.949868493  |
| C133  | 4.117902776  | 1.138035220  | 6.413411717  |
| C134  | 4.233805618  | 1.145854913  | 7.963108336  |
| C135  | 5.324483161  | 0.188797383  | 8.474796816  |
| C136  | 5.650664271  | 0.378390614  | 9.928600537  |
| C137  | 5.514304238  | 1.541682518  | 5.845919825  |
| C138  | 3.827582022  | -1.763290026 | 0.733128303  |
| Fe139 | 4.331755967  | -2.886819725 | 2.363481910  |
| Fe140 | 2.172059610  | -1.162952506 | -0.599210116 |
| Fe141 | 5.034316675  | -1.392474556 | -0.838260763 |
| Fe142 | 3.966433672  | -3.584986978 | -0.036530014 |
| Fe143 | 3.713648740  | -2.905283570 | -2.634561820 |
| Fe144 | 5.176880049  | -0.606348471 | 1.586997031  |
| Fe145 | 2.712097483  | -0.866890001 | 2.376182045  |
| H146  | -4.973387419 | 2.364670544  | 7.773453022  |
| H147  | -5.268515484 | 0.805825912  | 7.388304325  |
| H148  | -8.965097375 | 2.134444613  | 5.805832668  |
| H149  | -7.623053416 | 1.116894735  | 7.448430786  |
| H150  | -7.381872837 | 2.755411899  | 8.046835384  |
| H151  | -7.679341561 | 2.413204136  | 3.309642718  |
| H152  | -8.523327243 | 5.010816939  | 5.606854480  |
| H153  | -9.353210101 | 2.896522193  | 3.676990345  |
| H154  | -8.074109227 | 7.286667899  | 5.501173907  |
| H155  | -5.859959325 | 5.243924011  | 5.636179073  |
| H156  | -8.142575931 | 7.192235460  | 3.725574863  |
| H157  | -2.623307622 | 3.767762345  | 1.898371482  |
| H158  | -4.787483489 | 3.988164083  | 3.803401653  |
| H159  | -3.557816075 | 5.462397697  | 5.923238950  |
| H160  | -5.289157831 | 6.267678755  | -1.088494252 |
| H161  | -5.784515926 | 5.531278641  | 1.686189077  |
| H162  | -3.596688815 | 7.102469864  | 5.231623812  |
| H163  | -4.234686270 | 3.022931288  | 1.770303133  |
| H164  | -4.907045442 | 8.092179725  | 2.032560793  |



|      |              |              |              |
|------|--------------|--------------|--------------|
| H165 | -6.494823238 | 6.980408560  | 0.018666544  |
| H166 | 0.130990530  | 4.822639270  | 2.217065832  |
| H167 | 0.067846186  | 3.151744940  | 1.608976084  |
| H168 | 1.559776943  | 4.093354426  | 1.430740295  |
| H169 | -1.136667594 | 4.701748806  | 0.085645928  |
| H170 | -4.263920845 | 10.281686494 | 2.301443572  |
| H171 | -2.367442404 | 4.277649111  | -2.889505665 |
| H172 | -2.437340360 | 8.705456291  | -2.180565155 |
| H173 | -3.100825990 | 7.657016543  | -5.546324701 |
| H174 | 0.040422618  | 2.687026337  | -0.859802179 |
| H175 | 1.434310518  | 3.701776014  | -1.261798013 |
| H176 | 8.370549305  | 4.131040171  | -4.733539781 |
| H177 | -3.466845191 | 4.167956369  | -4.276289167 |
| H178 | -3.913995798 | 6.086909036  | -5.756013058 |
| H179 | -1.705841852 | 4.241584926  | -4.546408680 |
| H180 | -2.187318595 | 6.257265044  | -6.158256662 |
| H181 | -3.410653910 | 6.507091893  | -3.345025685 |
| H182 | -0.461042486 | 6.388123204  | -4.173919584 |
| H183 | -1.749794539 | 6.085281523  | -1.594780511 |
| H184 | -0.135431261 | 3.998049220  | -2.043827235 |
| H185 | 0.666582711  | -0.736876384 | -4.725571232 |
| H186 | -0.313106566 | 0.402327775  | -5.695633155 |
| H187 | 1.712199738  | 0.554978536  | -6.576486493 |
| H188 | 2.054216417  | 3.183056799  | -6.752535347 |
| H189 | 3.909773020  | 0.475417745  | -5.414925306 |
| H190 | 5.912710501  | 0.805177252  | -4.001377370 |
| H191 | 5.535158493  | 5.082006287  | -4.458014886 |
| H192 | -1.144998079 | 7.154177322  | 0.694803659  |
| H193 | -0.136483966 | 8.427391017  | 3.497427592  |
| H194 | 0.112518666  | 9.755334479  | 2.341681618  |
| H195 | -2.285415406 | 8.006693973  | 2.508273154  |
| H196 | -4.051280554 | 10.449637040 | 0.542984259  |
| H197 | 3.497867095  | 4.751355497  | -5.836367183 |
| H198 | 1.554167236  | 6.142694270  | -0.051951042 |
| H199 | -2.481903792 | 10.847602878 | -3.990465305 |
| H200 | -2.327151628 | 10.998021170 | -2.223234471 |
| H201 | 0.321367373  | 10.522165504 | -2.770474280 |
| H202 | 11.740792960 | 6.503118576  | 3.337550054  |
| H203 | -0.367969704 | -1.967588628 | 6.920447673  |
| H204 | 2.328796123  | 3.422537256  | 7.899944561  |
| H205 | -0.600456571 | -6.035855120 | 8.799328749  |
| H206 | 0.736675952  | -6.762771270 | 7.870344537  |
| H207 | -1.844297354 | -5.489730322 | 6.796689924  |
| H208 | -2.523564830 | -9.631094789 | 2.524599149  |
| H209 | -1.866786115 | -7.922532208 | 7.523059861  |
| H210 | -2.850431974 | -1.609904146 | 3.237341999  |
| H211 | -2.952857641 | 0.494701199  | 5.461480489  |
| H212 | -1.421989130 | -7.723325724 | 3.941959101  |
| H213 | -4.332086981 | -8.231809474 | 3.831504912  |
| H214 | 0.099371998  | -8.332911024 | 5.362816197  |
| H215 | -0.096191787 | -0.435956678 | 6.093363411  |
| H216 | -0.490214158 | -5.861844466 | 5.727968138  |
| H217 | 0.234751388  | -8.719876012 | 6.959595070  |
| H218 | -5.907509161 | -1.607030732 | 5.255565567  |
| H219 | -3.023952788 | 0.101516331  | 2.809330677  |
| H220 | 2.245121368  | -5.474964651 | 7.087852812  |
| H221 | -1.492735445 | 0.347577794  | 4.496437071  |
| H222 | -4.322287661 | 1.931210672  | -2.882836750 |
| H223 | -2.813225980 | 0.994164285  | -0.648549569 |
| H224 | -8.280638427 | 3.203988172  | -0.522196768 |
| H225 | -7.145126150 | 0.828330070  | 0.887100650  |
| H226 | -7.574984135 | 0.729532329  | -3.395754706 |

|      |               |              |               |
|------|---------------|--------------|---------------|
| H227 | -9.879961229  | 0.851631761  | -8.129882991  |
| H228 | -8.191042021  | 3.087526570  | -5.384527034  |
| H229 | -9.907552809  | 1.049332944  | -4.610832671  |
| H230 | -7.418590509  | 0.226676259  | -6.228901995  |
| H231 | -12.004802310 | -2.718581412 | -7.303923974  |
| H232 | -3.900496440  | -0.277825972 | -3.914846792  |
| H233 | -5.328110495  | -0.968802405 | -3.141037772  |
| H234 | -11.405146235 | -0.968840630 | -9.064718886  |
| H235 | -9.122392045  | -0.512835250 | -4.376818107  |
| H236 | -6.173858388  | 0.537986487  | -1.157697391  |
| H237 | -6.884968577  | 3.260237101  | 0.554228358   |
| H238 | -10.109965978 | -0.902063922 | 0.214983691   |
| H239 | -2.197630728  | -3.192303555 | -0.286901222  |
| H240 | -10.089823737 | -0.168945749 | 1.830223410   |
| H241 | 9.436887068   | 2.138313373  | -5.479412607  |
| H242 | 7.871401879   | 1.704488742  | -5.304345138  |
| H243 | 0.917159064   | -3.086166934 | -5.704286109  |
| H244 | -1.569904702  | -1.560258451 | -5.625874466  |
| H245 | 0.507759757   | -2.644080748 | -8.284088106  |
| H246 | -3.871570211  | -2.827113707 | -2.247461831  |
| H247 | -5.404527869  | -4.254671883 | -2.201631445  |
| H248 | -5.338879007  | -3.812294921 | -3.731108121  |
| H249 | -5.190103058  | -4.307123816 | 0.768559723   |
| H250 | -6.916544922  | -4.477856802 | 1.206524522   |
| H251 | -1.885919418  | -5.997487275 | -10.809700787 |
| H252 | -3.443951354  | -6.167138496 | -11.666468674 |
| H253 | -1.905520773  | -5.867191457 | -8.471403576  |
| H254 | -3.385064468  | -5.593260220 | -7.584161018  |
| H255 | -3.657010326  | -8.686992051 | -6.164410668  |
| H256 | -2.523868123  | -6.930550740 | -2.073945928  |
| H257 | -8.333229163  | -3.582626172 | -6.783933235  |
| H258 | -4.219244063  | -1.151170439 | -8.178128436  |
| H259 | -5.145860997  | -5.565482565 | -5.492136588  |
| H260 | 0.828495551   | -4.993435800 | -3.737763640  |
| H261 | 1.796971865   | -5.237009833 | -5.976634860  |
| H262 | -1.589051628  | -4.625681454 | -3.099363723  |
| H263 | -7.951333359  | -1.115811682 | 2.236665025   |
| H264 | 2.511330222   | -7.239344288 | -8.379399913  |
| H265 | -5.757225257  | -2.728484358 | 2.908076335   |
| H266 | 0.493562770   | -6.706438977 | -4.018438337  |
| H267 | -4.207607430  | -2.488847978 | -6.104716388  |
| H268 | -7.226984449  | -3.658304555 | -1.089143738  |
| H269 | 2.000758079   | -5.870520314 | -9.388267107  |
| H270 | -2.793523250  | -8.810352743 | -4.670499275  |
| H271 | -5.329595324  | -7.072511024 | -6.313457959  |
| H272 | -4.323349940  | -2.142402142 | 5.226452168   |
| H273 | -5.075840765  | 0.258529091  | 4.206488982   |
| H274 | -8.310449213  | -2.331070340 | -8.921737161  |
| H275 | -5.595128532  | -1.951213913 | 0.069871210   |
| H276 | -1.039267861  | -6.134202088 | -5.900736634  |
| H277 | -1.714534927  | -7.653262389 | -3.458740433  |
| H278 | -0.619628925  | -5.655077561 | -2.061013749  |
| H279 | -3.847022954  | -5.522678746 | -3.613722118  |
| H280 | -0.543662495  | -0.581462507 | -10.010179675 |
| H281 | -1.930051811  | -3.558038535 | -9.553255846  |
| H282 | -2.215087730  | -4.170933500 | -12.403641484 |
| H283 | 0.782723473   | -1.719450701 | -10.335520029 |
| H284 | -3.987900401  | -2.176523267 | -10.331906851 |
| H285 | 5.672863919   | -7.645515524 | 4.745556590   |
| H286 | 5.869957057   | -6.275298969 | 5.857682612   |
| H287 | 8.902140035   | -2.816847953 | 4.923490250   |
| H288 | 6.530761600   | -8.278794345 | 6.974224677   |

|      |              |              |              |
|------|--------------|--------------|--------------|
| H289 | 5.079713262  | -7.872156687 | 7.619731568  |
| H290 | 4.944268404  | -2.167279631 | -5.498715740 |
| H291 | 4.440808126  | -1.766514339 | -8.529558057 |
| H292 | 4.012767567  | -5.864880919 | -7.258261629 |
| H293 | 3.353260873  | -1.823433113 | -6.244404342 |
| H294 | 5.570009040  | -2.875010824 | -8.939493796 |
| H295 | 5.010413661  | -6.963814502 | -1.793183995 |
| H296 | 5.268877878  | -4.101339395 | -6.959142504 |
| H297 | 5.808970443  | 6.883594447  | 3.800044885  |
| H298 | 7.966143692  | 5.205159861  | 5.189566051  |
| H299 | 3.800596770  | -6.869407911 | 0.203759532  |
| H300 | 4.670925304  | 3.048085258  | -2.022410619 |
| H301 | 0.999973884  | -8.774396060 | 1.165695899  |
| H302 | -0.427397646 | -3.435615234 | 3.784995131  |
| H303 | 0.485071480  | -7.366645974 | 0.238914344  |
| H304 | 4.486068341  | 5.410439370  | 1.958085803  |
| H305 | 2.537949320  | -6.222664771 | 1.598747009  |
| H306 | 4.612222075  | 3.982680129  | 2.991347226  |
| H307 | 5.575016107  | 5.394110256  | 4.741617873  |
| H308 | 7.096166141  | 4.194743491  | 3.021245615  |
| H309 | 7.000080116  | 5.660234165  | 2.023581102  |
| H310 | -4.478747306 | -5.901255472 | 3.617982356  |
| H311 | 6.871382555  | 7.904477067  | 5.905030863  |
| H312 | 6.465626764  | 7.335596194  | 8.899192071  |
| H313 | 0.664726059  | -3.832949375 | 1.564142008  |
| H314 | 7.629508412  | 9.656019018  | 7.567740627  |
| H315 | 6.177291065  | 9.495277496  | 8.309131626  |
| H316 | 5.719270822  | 2.775440795  | 1.265001220  |
| H317 | -0.467539391 | -5.166009223 | -0.142639141 |
| H318 | -2.591339291 | -4.543391891 | 4.306013170  |
| H319 | 9.193756985  | 2.050464261  | 8.316258980  |
| H320 | 8.173741605  | -1.085798247 | 7.342710327  |
| H321 | 7.729838041  | 2.775867656  | 6.523034222  |
| H322 | 8.642413708  | 1.207718630  | 9.487927207  |
| H323 | 5.276175514  | -9.538374896 | -0.292505772 |
| H324 | 7.173062004  | 1.417355655  | 3.765989235  |
| H325 | 3.555733475  | 3.251949043  | 6.160413560  |
| H326 | 4.087208765  | -6.484225515 | 3.602497914  |
| H327 | 4.465717967  | 2.171380587  | 8.290928005  |
| H328 | 4.867002477  | -4.595843550 | 8.113220132  |
| H329 | 3.624618539  | -3.311364035 | 6.297290803  |
| H330 | 8.149449206  | 7.865476878  | 8.985513900  |
| H331 | 5.314748655  | 1.971390305  | -0.776968881 |
| H332 | 9.158605833  | 2.771225082  | 3.722719365  |
| H333 | 7.703981214  | 1.121632967  | 2.337790575  |
| H334 | 9.708132374  | 5.116424427  | 3.865037856  |
| H335 | 4.537587038  | 5.921637682  | -0.019770005 |
| H336 | 4.893421341  | 0.321132051  | 11.661441568 |
| H337 | 4.995252832  | -0.848540507 | 8.313552073  |
| H338 | 6.261003919  | 0.336205297  | 7.925781735  |
| H339 | 3.264653746  | 0.852047637  | 8.393354562  |
| H340 | 2.105175877  | -5.109681405 | 3.657840862  |
| H341 | -2.646196313 | -6.322151037 | 0.377362709  |
| H342 | -4.622681355 | -6.550461507 | 1.964941413  |
| H343 | 3.001509962  | 2.146231757  | 4.864037313  |
| H344 | 9.468255831  | 3.201764620  | 5.180563652  |
| H345 | 8.561019410  | 3.961578449  | 7.093306721  |
| H346 | 4.046930239  | 5.215658669  | -1.496519634 |
| H347 | 7.315820741  | -3.854052709 | 8.305617514  |
| H348 | 7.609156635  | -0.785390250 | 5.696274388  |
| H349 | 1.469676165  | -6.146498512 | 4.973148274  |
| H350 | 3.878606612  | -8.174144684 | -2.438807903 |

|       |               |              |               |
|-------|---------------|--------------|---------------|
| H351  | 7.026152644   | 4.083281462  | -2.688120205  |
| H352  | 7.203707700   | 2.319080328  | -2.559446668  |
| H353  | 10.488143737  | -3.758771618 | 6.363793434   |
| H354  | 10.097134312  | -2.776240783 | 7.612311045   |
| H355  | 11.679354006  | 1.422440178  | 6.734070205   |
| H356  | 9.932900983   | -0.012555566 | 7.060294198   |
| H357  | 13.030342888  | -0.886073013 | 6.136186372   |
| H358  | 11.242913986  | 1.362743204  | 5.012513370   |
| H359  | 9.975133328   | 2.584633681  | -2.611746658  |
| H360  | -5.123044616  | -0.936757948 | -13.057353915 |
| H361  | 10.619044058  | 7.777011009  | 2.790244429   |
| H362  | 9.872774155   | 5.845790317  | 0.979873353   |
| H363  | -6.661336839  | -2.783935902 | -11.215672485 |
| H364  | -5.488267155  | -0.169823620 | -10.082295778 |
| H365  | -7.212783592  | -0.523963334 | -10.288881281 |
| H366  | 1.792271225   | 0.016553126  | 3.191544212   |
| H367  | -7.130061245  | -4.203125005 | -4.962297997  |
| H368  | 0.351857028   | 0.107938807  | 1.259067850   |
| H369  | -1.541884291  | -0.911606283 | 0.553138630   |
| Mo370 | 4.636591490   | -0.895678424 | 4.240015748   |
| N371  | 2.446330617   | 1.744764390  | -0.099859467  |
| N372  | 2.358261433   | 0.638011500  | -0.271911235  |
| N373  | -5.638568123  | 1.599960707  | 7.916329977   |
| N374  | -8.171400257  | 2.586973710  | 5.359738046   |
| N375  | -8.098990102  | 5.347281207  | 4.745883077   |
| N376  | -5.420222144  | 6.061442087  | 5.215042854   |
| N377  | -4.073434928  | 4.471562439  | 3.256902130   |
| N378  | -5.121757416  | 5.709742038  | 0.928264906   |
| N379  | -4.425261715  | 8.507715858  | 1.230917169   |
| N380  | -1.709788217  | 8.775268846  | 2.149986573   |
| N381  | -0.131494056  | 7.061318569  | 0.685977129   |
| N382  | -1.006265439  | 6.492278484  | -2.164515092  |
| N383  | -1.865624857  | 9.104309109  | -2.927854428  |
| N384  | 6.839630348   | 9.019730154  | 7.694791981   |
| N385  | 7.292219766   | 6.975689137  | 6.018810281   |
| N386  | 5.342371569   | 3.707063901  | 1.068502020   |
| N387  | 4.285884862   | 5.074300066  | -0.519204442  |
| N388  | 4.938295991   | 2.904644023  | -1.053001554  |
| N389  | 9.675191947   | 6.125442700  | 3.602785800   |
| N390  | -5.128898260  | -1.853435724 | 4.641073062   |
| N391  | -0.705993945  | -1.231518734 | 6.292023805   |
| N392  | -5.855692937  | -2.066276417 | 2.120631964   |
| N393  | -8.337814267  | -1.171680171 | 1.297521553   |
| N394  | -7.830109876  | 1.386873389  | 0.364146435   |
| N395  | -6.004145646  | 1.324354217  | -1.779762115  |
| N396  | -3.427691701  | -2.057572586 | -1.676176640  |
| N397  | -2.282776734  | -1.039824425 | -0.155815429  |
| N398  | -7.142745497  | 0.986645673  | -4.280579502  |
| N399  | -10.779490696 | -1.533473770 | -5.983686451  |
| N400  | -11.080517667 | -0.944785259 | -8.101954936  |
| N401  | 8.704442871   | 1.988018888  | -4.781490609  |
| N402  | 5.166503057   | -2.377637125 | -8.140395327  |
| N403  | 3.292000944   | -5.400171133 | -7.804360997  |
| N404  | 0.911078711   | -5.618529629 | -6.348005963  |
| N405  | -3.336128723  | -6.374859375 | -3.902706388  |
| N406  | -3.301374477  | -8.231586270 | -5.330007694  |
| N407  | -4.736931996  | -6.465046293 | -5.754004758  |
| N408  | -0.082934023  | -2.977567535 | -5.934435259  |
| N409  | -0.307894214  | -2.110102532 | -8.601706689  |
| N410  | -1.996149097  | -3.298004629 | -10.538862316 |
| N411  | -2.902241807  | -5.617024861 | -8.481546515  |
| N412  | -4.586569599  | -2.512369874 | -11.082177480 |

|      |               |              |               |
|------|---------------|--------------|---------------|
| N413 | 5.530937870   | -8.218908152 | 6.768183744   |
| N414 | 3.408079324   | -6.585409079 | 4.367289946   |
| N415 | 1.866722658   | -6.995612678 | 1.790307229   |
| N416 | 3.541644593   | -7.619409234 | -0.449711730  |
| N417 | -0.433531804  | -8.620704176 | 6.192662782   |
| N418 | -2.392684847  | -7.757498439 | 4.272711583   |
| N419 | 9.704633707   | -3.263399549 | 6.799944757   |
| N420 | 5.507723856   | -2.320350417 | 5.984324871   |
| N421 | 5.298738237   | -3.887628932 | 7.525460277   |
| N422 | 10.507941242  | -0.217058985 | 6.243236085   |
| N423 | -0.150522682  | -0.948920769 | -2.439770456  |
| N424 | 0.747503594   | -0.990176059 | -1.762090820  |
| O425 | -5.932196304  | 2.989269637  | 5.418507477   |
| O426 | -7.416941611  | 4.816495209  | 2.635305442   |
| O427 | -5.713604341  | 7.888256948  | 3.872609294   |
| O428 | -2.514228771  | 6.125545718  | 3.174617667   |
| O429 | -3.255616100  | 5.038900238  | -0.186306004  |
| O430 | -4.105698961  | 8.488999523  | -1.032399397  |
| O431 | -1.677791645  | 10.885738660 | 1.245183857   |
| O432 | 1.791912447   | 7.781513187  | 1.723599376   |
| O433 | 1.220814548   | 6.941696842  | -2.372347089  |
| O434 | -0.634008161  | 8.790162645  | -4.809724703  |
| O435 | -0.250801174  | 12.179737378 | -3.817320638  |
| O436 | 8.254524325   | 5.653247239  | 7.654569378   |
| O437 | 8.481450848   | 8.088915386  | 3.684336415   |
| O438 | 11.875935272  | 6.161452716  | 0.762643760   |
| O439 | -5.422772426  | 0.127972300  | 1.607715107   |
| O440 | -2.663364967  | -2.344962331 | 5.967155608   |
| O441 | -8.068239788  | -2.074820017 | -0.785154603  |
| O442 | -6.489576622  | -4.269425970 | -0.828393799  |
| O443 | -10.029598358 | 1.651601036  | -0.250917357  |
| O444 | -6.182174891  | 3.583129399  | -2.057154752  |
| O445 | -5.236574563  | 1.759727711  | -5.281422399  |
| O446 | -8.158034631  | 2.468941622  | -7.327878720  |
| O447 | 9.912196024   | 4.621587792  | -2.738812783  |
| O448 | 2.459640626   | 2.341245068  | -6.474248008  |
| O449 | 2.442405879   | -3.407056169 | -8.514233540  |
| O450 | -0.160915222  | -6.514173722 | -8.172783253  |
| O451 | -2.165098976  | -3.917195583 | -5.777452731  |
| O452 | -1.852438045  | -0.544820126 | -7.951844984  |
| O453 | 1.378287582   | -0.361655358 | -6.663496226  |
| O454 | -1.031459104  | -2.058005807 | -12.206343546 |
| O455 | -4.808869320  | -4.046033007 | -12.755594501 |
| O456 | -4.909471710  | -5.598139733 | -9.576179500  |
| O457 | -7.163273639  | -1.026060863 | -13.084877517 |
| O458 | -6.229337791  | -3.872363312 | -5.145396753  |
| O459 | 3.148054713   | -6.791515434 | 6.643576803   |
| O460 | 0.470877163   | -7.861711700 | 3.384623098   |
| O461 | 1.937282294   | -9.034357297 | -1.250760326  |
| O462 | 6.360231285   | -9.290210096 | -2.004022436  |
| O463 | -3.824478148  | -7.674387598 | 6.046850123   |
| O464 | 0.055115680   | -3.572176637 | 8.128252310   |
| O465 | 1.891952963   | -4.564178305 | 7.341657812   |
| O466 | -3.592040523  | -8.706549277 | 1.057021882   |
| O467 | 10.954811041  | -1.463300331 | 4.405189414   |
| O468 | 13.745175380  | 0.590722738  | 4.921812814   |
| O469 | 0.837360348   | 1.432494840  | 6.180691107   |
| O470 | 1.528640680   | 2.898835994  | 7.702437677   |
| O471 | 6.749502512   | 0.694942161  | 10.379378307  |
| O472 | 4.583724284   | 0.163902464  | 10.743895530  |
| O473 | 6.043638618   | 0.698686033  | 5.022445896   |
| O474 | 6.063796116   | 2.599895936  | 6.234076262   |

|                   |                                |              |               |              |
|-------------------|--------------------------------|--------------|---------------|--------------|
|                   | O475                           | 3.712407202  | -0.092620428  | 5.940696234  |
|                   | O476                           | 9.776612831  | 3.341334114   | 4.245954089  |
|                   | O477                           | 7.737314796  | 1.795670072   | 3.044123018  |
|                   | O478                           | -4.779606208 | -4.084839871  | -2.961356412 |
|                   | O479                           | 9.485410033  | 1.473401863   | 9.066747450  |
|                   | O480                           | 8.663225131  | 3.023350651   | 6.790910640  |
|                   | S481                           | 3.222976853  | -3.745357786  | -4.757305668 |
|                   | S482                           | 1.964424160  | -3.548562792  | -1.157651765 |
|                   | S483                           | 2.816810238  | -2.409536195  | 3.944932736  |
|                   | S484                           | 3.649375875  | -0.686548356  | -2.446114405 |
|                   | S485                           | 0.735598722  | -1.198447242  | 1.256845761  |
|                   | S486                           | 4.433003484  | -5.006242376  | 1.658784260  |
|                   | S487                           | 3.981981102  | 0.884439707   | 2.757185618  |
|                   | S488                           | 5.682448788  | -3.432441177  | -1.557175642 |
|                   | S489                           | 6.313141853  | -1.977403849  | 2.934694739  |
|                   | S490                           | 6.429846098  | 0.171885055   | -0.075622885 |
| <b>7, 47(5/2)</b> | <b>bm12b6x2n2x6n2nas.car_3</b> |              |               |              |
| <b>Fe1 3.06</b>   | C1                             | -7.996836057 | -5.166183346  | -0.205409044 |
| <b>Fe2 0.71</b>   | C2                             | -8.086258092 | -6.328577666  | -1.198006189 |
| <b>Fe3 2.75</b>   | C3                             | -9.119866319 | -3.192357459  | 0.735124733  |
| <b>Fe4 -2.40</b>  | C4                             | -8.916948354 | -3.467047874  | 2.222649771  |
| <b>Fe5 2.55</b>   | C5                             | -9.194528385 | -5.013368017  | 4.092568058  |
| <b>Fe6 0.00</b>   | C6                             | -7.729360247 | -5.274888125  | 4.462495888  |
| <b>Fe7 -2.10</b>  | C7                             | -5.511302150 | -5.937477632  | 3.666385568  |
|                   | C8                             | -4.739319453 | -4.613843451  | 3.689570581  |
|                   | C9                             | -4.495496935 | -2.361521779  | 2.784168441  |
|                   | C10                            | -4.787910596 | -1.564694047  | 4.064824431  |
|                   | C11                            | -6.361317487 | -0.995352302  | 5.819239366  |
|                   | C12                            | -5.730268424 | -1.603596153  | 7.079556955  |
|                   | C13                            | -5.409417567 | -3.625483489  | 8.425321981  |
|                   | C14                            | -3.936617553 | -4.038166596  | 8.549647472  |
|                   | C15                            | -1.926739088 | -4.853989507  | 7.389094404  |
|                   | C16                            | -0.848043127 | -3.875706980  | 6.911464894  |
|                   | C17                            | -0.440453497 | -1.659088981  | 5.854610746  |
|                   | C18                            | -0.527017818 | -0.393812923  | 6.725393111  |
|                   | C19                            | -0.735415067 | -1.398418408  | 4.359391904  |
|                   | C20                            | -0.026140137 | -0.128948225  | 3.876054254  |
|                   | C21                            | -0.379206885 | -2.635211154  | 3.528218641  |
|                   | C22                            | -1.856295563 | 1.548373512   | 7.419234106  |
|                   | C23                            | -1.998205316 | 1.310398482   | 8.932545057  |
|                   | C24                            | -3.010594457 | 2.393965219   | 6.827400850  |
|                   | C25                            | -3.239250230 | 3.668387294   | 7.648961261  |
|                   | C26                            | -2.726139713 | 2.750580850   | 5.361750580  |
|                   | C27                            | -3.048327877 | 0.049243205   | 10.718231728 |
|                   | C28                            | -1.749758785 | -0.185894328  | 11.462999869 |
|                   | C29                            | 4.880041479  | -11.381225512 | 5.357671734  |
|                   | C30                            | 5.544062842  | -10.164044651 | 4.711483709  |
|                   | C31                            | 5.869802481  | -7.702169715  | 5.001061702  |
|                   | C32                            | 6.911485528  | -7.300116886  | 6.063350510  |
|                   | C33                            | 4.736389159  | -6.667150490  | 4.890413018  |
|                   | C34                            | 5.223342363  | -5.258827136  | 4.540754097  |
|                   | C35                            | 4.063024924  | -4.362108821  | 4.104743767  |
|                   | C36                            | 4.179027900  | -1.858061321  | 4.213049561  |
|                   | C37                            | 9.203382354  | -6.519546531  | 6.442400057  |
|                   | C38                            | 9.502194642  | -5.036014320  | 6.442626297  |
|                   | C39                            | -5.052015093 | -2.521132284  | -2.407995838 |
|                   | C40                            | -5.475444047 | -1.081581284  | -2.067154337 |
|                   | C41                            | -3.541800412 | -2.638351559  | -2.098138094 |
|                   | C42                            | -2.964269677 | -4.066391789  | -2.015349376 |
|                   | C43                            | -2.474121880 | -4.656100193  | -3.335474389 |
|                   | C44                            | -5.742945355 | 1.179268903   | -3.043783802 |

|      |              |              |              |
|------|--------------|--------------|--------------|
| C45  | -7.031498009 | 1.624110636  | -2.351107020 |
| C46  | -5.571463516 | 1.792914883  | -4.460565410 |
| C47  | -9.293760765 | 0.986190258  | -1.647959989 |
| C48  | -9.114430918 | 1.064292702  | -0.125559155 |
| C49  | -7.641165881 | 0.665155093  | 1.796697083  |
| C50  | -6.545138949 | 1.661471334  | 2.184851914  |
| C51  | -4.851025257 | 3.293161566  | 1.502094594  |
| C52  | -5.428922945 | 4.597003551  | 2.085547610  |
| C53  | -4.041034347 | 3.701702900  | 0.261753089  |
| C54  | -3.286290734 | 2.617282674  | -0.442075471 |
| C55  | -2.880677700 | 1.370644367  | -0.021789251 |
| C56  | -2.181970431 | 1.728482958  | -2.094681347 |
| C57  | -7.188495489 | 6.288169055  | 1.761591088  |
| C58  | -7.438789594 | 6.480658911  | 3.255199411  |
| C59  | -8.516174686 | 6.357784933  | 0.971775924  |
| C60  | -9.042295881 | 7.730467605  | 0.674312961  |
| C61  | -9.060330295 | 8.877676278  | 1.442750387  |
| C62  | -9.986288730 | 9.256451587  | -0.534474364 |
| C63  | 8.366533290  | 1.450162083  | 5.140836204  |
| C64  | 9.290062756  | 0.247588759  | 5.183989184  |
| C65  | 6.979964374  | 0.926092687  | 4.691831924  |
| C66  | 5.916302944  | 1.999442677  | 4.674091380  |
| C67  | 5.145176648  | 2.286403164  | 5.815042671  |
| C68  | 5.660296582  | 2.739124034  | 3.505738376  |
| C69  | 4.151228241  | 3.272643855  | 5.791995459  |
| C70  | 4.679779309  | 3.731745345  | 3.469290256  |
| C71  | 3.923274573  | 3.996735368  | 4.614083866  |
| C72  | 5.885173450  | 7.032438379  | -0.367569739 |
| C73  | 4.910822009  | 8.074577319  | -0.931101871 |
| C74  | 5.154472332  | 5.705285310  | -0.111430946 |
| C75  | 4.189931210  | 9.330914349  | -2.914685295 |
| C76  | 2.773185588  | 8.836219919  | -3.214085649 |
| C77  | 1.260963318  | 6.892249022  | -3.358566047 |
| C78  | 0.463693526  | 6.824790211  | -2.038611831 |
| C79  | 1.428202146  | 5.517688630  | -4.030428061 |
| C80  | 0.156435209  | 4.723804566  | -4.346607089 |
| C81  | -0.729823358 | 5.250013220  | -5.490541126 |
| C82  | -2.030802477 | 7.380975436  | -5.350154877 |
| C83  | 0.445399281  | 6.437430928  | 0.367127593  |
| C84  | 0.244327076  | 7.810612654  | 1.034977476  |
| C85  | 1.118589263  | 5.503312460  | 1.380871794  |
| C86  | 1.314247097  | 9.933857650  | 1.607771140  |
| C87  | 0.689204670  | 11.257817493 | 1.175551766  |
| C88  | -0.609423335 | 12.482948045 | -0.519405104 |
| C89  | -2.008872435 | 12.892035217 | -0.009862294 |
| C90  | -0.579416665 | 12.434925736 | -2.063982068 |
| C91  | -1.506132280 | 11.352557079 | -2.607013493 |
| C92  | -4.067823830 | 12.150269012 | 1.112322106  |
| C93  | -4.163960653 | 13.209435131 | 2.204280280  |
| C94  | -4.658617812 | 10.810057866 | 1.626386529  |
| C95  | -4.742128361 | 9.755981183  | 0.543625135  |
| C96  | -5.842328472 | 9.720156031  | -0.327378279 |
| C97  | -3.716782533 | 8.815464227  | 0.354319036  |
| C98  | -5.914238740 | 8.788856034  | -1.366531838 |
| C99  | -3.759122438 | 7.891139724  | -0.695215635 |
| C100 | -4.862080900 | 7.888092632  | -1.547921412 |
| C101 | 5.546886918  | -4.095264589 | -8.103268946 |
| C102 | 4.063958410  | -3.851206552 | -7.879399833 |
| C103 | 2.402684774  | -2.299043400 | -6.876588764 |
| C104 | 2.019373516  | -0.962224971 | -7.523495467 |
| C105 | 2.417185235  | 1.454806945  | -7.506744326 |
| C106 | 3.566911509  | 2.452198648  | -7.403820546 |

|       |               |               |              |
|-------|---------------|---------------|--------------|
| C107  | 5.749308403   | 3.064243667   | -6.481381391 |
| C108  | 6.835739880   | 2.950509569   | -7.533597110 |
| C109  | -1.168774604  | -3.591168883  | -9.430166984 |
| C110  | -2.213674827  | -2.474027649  | -9.309231818 |
| C111  | -0.934640769  | -4.233942948  | -8.044062352 |
| C112  | -0.186482933  | -5.573862317  | -8.165769699 |
| C113  | 0.274755292   | -6.056114727  | -6.808821138 |
| C114  | -2.667382419  | -0.132212137  | -8.759391753 |
| C115  | -2.056030934  | 1.136123411   | -9.323551513 |
| C116  | -3.266862511  | 0.011956829   | -7.338646451 |
| C117  | -2.185068879  | -0.086419696  | -6.299637771 |
| C118  | -1.396548226  | 1.029471639   | -5.980931136 |
| C119  | -1.842189983  | -1.337728813  | -5.758498136 |
| C120  | -0.240172750  | 0.877666500   | -5.210799800 |
| C121  | -0.683766193  | -1.488841237  | -4.991150706 |
| C122  | 0.139439368   | -0.384829146  | -4.751284877 |
| C123  | 8.557348850   | -6.375905223  | -3.122361211 |
| C124  | 9.521683145   | -6.464128708  | -1.928996410 |
| C125  | 7.149581113   | -6.871793474  | -2.760822092 |
| C126  | 6.078873727   | -6.622427351  | -3.778294666 |
| C127  | 5.948914620   | -7.197853860  | -5.025808046 |
| C128  | 4.160933888   | -5.961013582  | -4.599038450 |
| C129  | 10.404050761  | -7.715630961  | -0.040157840 |
| C130  | 11.841041334  | -7.452187442  | -0.434785452 |
| C131  | 0.526453890   | -7.120406289  | 0.080719611  |
| C132  | 1.924001356   | -6.787290963  | 0.525629783  |
| C133  | 3.011228698   | -7.058157462  | -0.590086554 |
| C134  | 2.919941689   | -8.539187934  | -1.064705881 |
| C135  | 4.066590951   | -8.916617367  | -2.018712443 |
| C136  | 4.186321668   | -10.392419274 | -2.271562986 |
| C137  | 4.410286360   | -6.912219371  | 0.084522854  |
| C138  | 3.902553980   | -0.808932357  | -1.519365106 |
| Fe139 | 4.344624590   | -2.063455689  | -3.012287567 |
| Fe140 | 2.423320118   | 0.693058587   | -1.063034193 |
| Fe141 | 5.181474224   | 0.326513391   | -0.517104427 |
| Fe142 | 4.402760860   | 0.456564175   | -2.965536696 |
| Fe143 | 4.265638495   | 2.724057208   | -1.603573121 |
| Fe144 | 5.033337727   | -2.181432854  | -0.577064817 |
| Fe145 | 2.368048397   | -2.393654717  | -0.836016254 |
| H146  | -6.257998514  | -7.123770393  | -0.776598350 |
| H147  | -6.276309328  | -6.235033084  | -2.145567184 |
| H148  | -9.857351908  | -4.509741731  | -0.778716273 |
| H149  | -8.649004110  | -6.008253081  | -2.088079543 |
| H150  | -8.702270900  | -7.104704267  | -0.710588284 |
| H151  | -8.328698180  | -2.489743999  | 0.436642937  |
| H152  | -9.864747957  | -5.283441975  | 2.064067178  |
| H153  | -10.088199468 | -2.691608931  | 0.600314273  |
| H154  | -9.778476958  | -5.920166217  | 4.298428127  |
| H155  | -7.301940493  | -5.790538933  | 2.520288122  |
| H156  | -9.549979215  | -4.215411245  | 4.757140890  |
| H157  | -3.403283241  | -2.441193823  | 2.705817877  |
| H158  | -5.807137221  | -3.912717383  | 2.065999484  |
| H159  | -5.123231439  | -6.570765158  | 2.856797262  |
| H160  | -6.023768153  | 0.046277325   | 5.753380905  |
| H161  | -6.757265482  | -2.209881293  | 4.086244291  |
| H162  | -5.319723888  | -6.436287176  | 4.623576810  |
| H163  | -4.862148966  | -1.804919493  | 1.909544234  |
| H164  | -6.304561161  | -3.504403839  | 6.489522497  |
| H165  | -7.453845444  | -1.004307739  | 5.939284841  |
| H166  | -0.924205816  | -3.521674458  | 3.884880846  |
| H167  | -0.644151342  | -2.477526431  | 2.471300143  |
| H168  | 0.699692104   | -2.846869931  | 3.568071236  |



|      |              |              |               |
|------|--------------|--------------|---------------|
| H169 | -1.819736878 | -1.232712500 | 4.265663027   |
| H170 | -6.017191125 | -4.535533617 | 8.532787023   |
| H171 | -2.664857011 | 1.863371586  | 4.716072432   |
| H172 | -3.433923916 | -0.164424464 | 8.630966314   |
| H173 | -3.524148504 | 3.453495794  | 8.688917624   |
| H174 | -0.217348983 | 0.030598040  | 2.806063081   |
| H175 | 1.062106546  | -0.197699147 | 4.003708811   |
| H176 | 8.266573337  | 1.830288338  | 6.175447475   |
| H177 | -3.532074622 | 3.386328139  | 4.967241082   |
| H178 | -4.040334537 | 4.264978135  | 7.188545331   |
| H179 | -1.778922589 | 3.307629076  | 5.277517271   |
| H180 | -2.327304532 | 4.286077039  | 7.669681563   |
| H181 | -3.930946940 | 1.784277864  | 6.869317944   |
| H182 | -0.915796372 | 2.110703490  | 7.313934436   |
| H183 | -2.451661006 | -0.006345214 | 6.056811887   |
| H184 | -0.381683390 | 0.761196532  | 4.413705055   |
| H185 | 1.374887769  | 4.554695343  | 0.880503243   |
| H186 | 0.377933403  | 5.295790835  | 2.169353611   |
| H187 | 2.461359167  | 5.709287379  | 2.796247003   |
| H188 | 2.435994296  | 5.004396477  | 5.350304526   |
| H189 | 4.476679485  | 4.267778072  | 2.542559611   |
| H190 | 6.206077859  | 2.507478379  | 2.589061707   |
| H191 | 5.309575867  | 1.724994980  | 6.738985692   |
| H192 | -2.311541325 | -2.582037109 | 6.336803886   |
| H193 | -1.862012193 | -5.744789175 | 6.746437137   |
| H194 | -1.664187417 | -5.151330559 | 8.412717001   |
| H195 | -3.800306139 | -4.373129117 | 6.502096950   |
| H196 | -5.616443466 | -2.968999784 | 9.279977090   |
| H197 | 3.546186466  | 3.468049726  | 6.681269170   |
| H198 | 0.588769751  | -2.023103173 | 5.970651773   |
| H199 | -3.607594084 | 0.855435748  | 11.220606356  |
| H200 | -3.640715741 | -0.875246688 | 10.802347182  |
| H201 | -0.906462583 | -0.562293882 | 10.839077875  |
| H202 | 10.116773868 | -7.075907746 | 6.184384639   |
| H203 | -0.996704021 | -5.836355814 | -4.123192345  |
| H204 | 0.751194790  | -8.845426334 | 0.919571542   |
| H205 | -0.863192754 | -6.330071151 | -8.589598523  |
| H206 | 0.674576062  | -5.465233621 | -8.841628542  |
| H207 | -1.897938926 | -4.405969490 | -7.540163958  |
| H208 | -1.325655038 | 0.963112868  | -10.149142470 |
| H209 | -1.665920287 | -4.342954265 | -10.062790805 |
| H210 | -2.986992072 | -2.048098098 | -2.846030369  |
| H211 | -3.724756916 | -4.757925119 | -1.612492118  |
| H212 | -0.762774976 | -1.119451771 | -8.706105309  |
| H213 | -3.512673202 | -0.339585832 | -9.447240847  |
| H214 | 0.616922738  | -2.540669646 | -9.566845461  |
| H215 | -0.837393469 | -5.536591699 | -2.396216207  |
| H216 | -0.373598499 | -3.526381023 | -7.414723575  |
| H217 | 0.588973475  | -3.945287663 | -10.428538521 |
| H218 | -6.265698396 | -3.274414390 | -3.896707190  |
| H219 | -3.379439212 | -2.160996811 | -1.120667361  |
| H220 | 2.071215305  | -5.372559861 | -7.237345603  |
| H221 | -2.137720113 | -4.072223160 | -1.290786339  |
| H222 | -4.197454670 | 2.867979290  | 2.276639241   |
| H223 | -3.013014639 | 0.836520571  | 0.911967628   |
| H224 | -8.553371188 | 0.970795798  | 2.325984778   |
| H225 | -7.250267225 | 0.141353892  | -0.232982941  |
| H226 | -7.070032661 | 4.342271055  | 0.881354481   |
| H227 | -8.692071703 | 9.094191142  | 2.439454960   |
| H228 | -7.736211870 | 5.541899506  | 3.782333183   |
| H229 | -9.275505152 | 5.743431027  | 1.487881451   |
| H230 | -6.498716202 | 7.075271361  | 1.416789968   |

|      |               |              |              |
|------|---------------|--------------|--------------|
| H231 | -10.473089552 | 9.800956640  | -1.339198635 |
| H232 | -3.337554551  | 4.486094584  | 0.587040651  |
| H233 | -4.719748477  | 4.175954074  | -0.465603638 |
| H234 | -9.822377694  | 10.807204876 | 0.914366858  |
| H235 | -8.344720209  | 5.875547241  | -0.003173735 |
| H236 | -6.168827481  | 2.183095353  | 0.208055352  |
| H237 | -7.347703427  | -0.313624785 | 2.202772629  |
| H238 | -9.777521737  | 1.926105293  | -1.949174815 |
| H239 | -1.692539465  | 1.547853219  | -3.047915472 |
| H240 | -9.994376763  | 0.168422344  | -1.867561631 |
| H241 | 9.679916442   | 2.927867536  | 4.603981574  |
| H242 | 8.178164597   | 3.133425934  | 3.991745351  |
| H243 | 2.107272521   | 6.108591339  | -0.988045841 |
| H244 | -0.564369212  | 6.046507690  | 0.174604511  |
| H245 | 1.991100392   | 8.501318716  | 0.212040681  |
| H246 | -3.349363755  | 4.070463818  | -2.770013760 |
| H247 | -4.991218683  | 3.665510859  | -4.088858437 |
| H248 | -4.192022190  | 5.426548581  | -2.884900464 |
| H249 | -4.572593749  | 1.483174931  | -4.820032827 |
| H250 | -6.321986516  | 1.340470092  | -5.129424634 |
| H251 | 0.461785199   | 12.281521046 | -2.383909862 |
| H252 | -0.925519743  | 13.407422369 | -2.437027633 |
| H253 | 0.104076282   | 10.047228923 | -2.996454209 |
| H254 | -1.504061403  | 9.382353180  | -3.160677206 |
| H255 | -1.484182034  | 8.986256733  | -6.496148590 |
| H256 | -1.189844426  | 4.405301219  | -6.023726027 |
| H257 | -6.785096594  | 8.764011524  | -2.027166273 |
| H258 | -2.858560473  | 8.783399283  | 1.032450249  |
| H259 | -3.533450339  | 7.651039244  | -3.967738361 |
| H260 | 2.059380350   | 4.884598604  | -3.386381243 |
| H261 | 3.334042571   | 6.887287961  | -2.836717689 |
| H262 | -0.454591511  | 4.576455551  | -3.442374181 |
| H263 | -7.942884334  | -0.125870782 | -2.888927869 |
| H264 | 4.651430505   | 9.633175571  | -3.865056496 |
| H265 | -5.453180884  | -0.755407656 | -4.037392152 |
| H266 | 1.993003267   | 5.677732015  | -4.964562617 |
| H267 | -2.926294694  | 7.205383967  | -0.861087439 |
| H268 | 4.077604180   | 10.230566754 | -2.294287742 |
| H269 | -0.809012793  | 7.481045137  | -7.003389625 |
| H270 | -3.367036170  | 8.909309690  | -5.136662885 |
| H271 | -4.631040439  | -3.488871579 | -4.171340702 |
| H272 | -5.592535092  | -3.161189510 | -1.684438102 |
| H273 | -6.665765801  | 10.426049289 | -0.192035199 |
| H274 | -4.939043680  | 1.566974117  | -2.401193631 |
| H275 | 0.681867624   | 7.565989570  | -4.003719466 |
| H276 | -0.113450276  | 5.782580805  | -6.226660728 |
| H277 | 0.497115368   | 3.721367109  | -4.638660404 |
| H278 | -2.509025221  | 5.654951485  | -4.383648843 |
| H279 | 0.889627824   | 9.699898518  | 2.595888558  |
| H280 | -0.120516239  | 10.383462624 | -0.494252770 |
| H281 | 0.057828551   | 13.292327446 | -0.188657241 |
| H282 | 2.387561655   | 10.126921542 | 1.738249515  |
| H283 | -2.253757908  | 11.043583235 | 0.820129434  |
| H284 | 6.077335274   | -3.134339819 | -8.174437749 |
| H285 | 5.910639447   | -4.594025521 | -7.181264304 |
| H286 | 8.506331623   | -5.306604435 | -3.374040423 |
| H287 | 6.706894006   | -5.240441711 | -9.330935936 |
| H288 | 5.127566703   | -5.678510736 | -9.310281367 |
| H289 | 5.891470495   | 4.967027486  | 0.229160288  |
| H290 | 5.756848763   | 7.771612365  | 1.525475340  |
| H291 | 5.749911970   | 7.871152253  | -2.797007542 |
| H292 | 4.401600184   | 5.855424756  | 0.675532109  |

|      |              |               |              |
|------|--------------|---------------|--------------|
| H293 | 7.056391654  | 8.328222152   | 0.707608149  |
| H294 | 6.197594788  | 2.901378023   | -5.488418047 |
| H295 | 6.689407602  | 6.856911551   | -1.099538165 |
| H296 | 4.174721189  | -6.652396015  | 5.839386157  |
| H297 | 6.356149775  | -7.809979552  | 4.023948766  |
| H298 | 4.700493018  | 1.251874123   | -6.126205672 |
| H299 | 4.302994660  | 0.175113108   | 3.968448101  |
| H300 | 2.144474730  | 1.380887047   | -8.567794567 |
| H301 | -0.416092985 | -2.465764696  | -4.581977828 |
| H302 | 1.555109533  | 1.921637801   | -7.000047494 |
| H303 | 3.316121658  | -4.252914808  | 4.902254130  |
| H304 | 3.195247162  | -0.049681759  | -6.134768600 |
| H305 | 3.544326965  | -4.819165638  | 3.246879403  |
| H306 | 4.050572959  | -7.027583959  | 4.106835293  |
| H307 | 5.943945217  | -5.300348364  | 3.709680450  |
| H308 | 5.737451414  | -4.799271463  | 5.400507532  |
| H309 | -4.009402823 | -0.787235419  | -7.203312370 |
| H310 | 4.792580026  | -9.104028185  | 6.231261698  |
| H311 | 4.061515015  | -11.678630925 | 4.684418026  |
| H312 | 1.066403486  | -0.490848617  | -4.193313562 |
| H313 | 5.028132858  | -11.320598869 | 7.412215379  |
| H314 | 3.530674114  | -11.714382202 | 6.875477285  |
| H315 | 4.991571035  | -2.997265638  | 2.768370205  |
| H316 | 0.390387847  | 1.732817106   | -4.963605041 |
| H317 | -2.476627267 | -2.204831203  | -5.955079268 |
| H318 | 7.600251587  | -9.991684189  | 0.170101950  |
| H319 | 7.194011632  | -7.960974545  | -2.579078963 |
| H320 | 6.292047045  | -8.275476303  | 1.280091233  |
| H321 | 7.030384853  | -10.734043195 | -1.059492265 |
| H322 | 6.633215235  | 2.216697511   | -8.350878363 |
| H323 | 6.355724418  | -5.209194830  | 0.795655577  |
| H324 | 2.192661285  | -7.345218959  | 1.434318505  |
| H325 | 4.504456038  | -2.131373335  | -6.852601829 |
| H326 | 2.957206084  | -9.190550728  | -0.177277601 |
| H327 | 4.325068771  | -7.033621638  | -6.414232837 |
| H328 | 3.183795907  | -5.510492993  | -4.726665133 |
| H329 | 5.624029565  | -12.195627553 | 5.325742550  |
| H330 | 4.923319882  | -0.772463770  | 2.615088469  |
| H331 | 8.062312077  | -5.892111327  | 2.326833160  |
| H332 | 7.005129624  | -3.830401617  | 1.093333376  |
| H333 | 8.245172130  | -6.826332086  | 4.536844935  |
| H334 | 3.584865736  | -2.574113521  | 6.044345587  |
| H335 | 3.234595957  | -11.884103306 | -2.941708883 |
| H336 | 3.911835729  | -8.403051493  | -2.979168466 |
| H337 | 5.031557354  | -8.592116355  | -1.614006903 |
| H338 | 1.955607775  | -8.693962723  | -1.569510820 |
| H339 | 2.345879669  | -2.228424476  | -5.779167515 |
| H340 | -1.674112736 | 2.008385604   | -6.378251496 |
| H341 | -3.787709873 | 0.980846568   | -7.301303703 |
| H342 | 1.961443588  | -5.709729595  | 0.733404970  |
| H343 | 8.104940741  | -7.443710883  | 2.288394673  |
| H344 | 6.844555217  | -9.315272917  | 2.297728117  |
| H345 | 3.363848987  | -0.891815742  | 5.821075083  |
| H346 | 6.600246464  | -7.869162612  | -5.572832303 |
| H347 | 6.838283658  | -6.412391953  | -1.815460861 |
| H348 | 1.704246288  | -3.060263502  | -7.228068790 |
| H349 | 5.357930853  | 4.093087321   | -6.507336021 |
| H350 | 6.688904085  | 0.119815868   | 5.381966677  |
| H351 | 7.085092970  | 0.484964704   | 3.687636134  |
| H352 | 10.006545252 | -6.678785269  | -4.542951970 |
| H353 | 9.283149477  | -8.062215252  | -4.053369401 |
| H354 | 10.351878355 | -8.755458891  | 0.319360764  |

|       |              |               |               |
|-------|--------------|---------------|---------------|
| H355  | 8.801387096  | -8.329898324  | -1.302182420  |
| H356  | 12.085907802 | -7.677618297  | -1.500685251  |
| H357  | 10.118253615 | -7.059131312  | 0.797790943   |
| H358  | 9.740072223  | -0.021146558  | 4.197950022   |
| H359  | -3.220369969 | 13.384718761  | 2.774819370   |
| H360  | 8.914800370  | -6.791851406  | 7.472810844   |
| H361  | 8.642346021  | -4.380262863  | 6.161747472   |
| H362  | -4.667761211 | 12.503558896  | 0.257754169   |
| H363  | -4.046500476 | 10.449375183  | 2.468579117   |
| H364  | -5.661284873 | 11.026234771  | 2.023284002   |
| H365  | 1.242298798  | -3.376794323  | -0.577703191  |
| H366  | -5.735155885 | 7.011078979   | -3.051813476  |
| H367  | 0.095595156  | -0.771450604  | -0.526593037  |
| H368  | -1.708002218 | -0.068547215  | -1.102224138  |
| Mo369 | 4.135075329  | -4.496386367  | -1.740578961  |
| N370  | 1.961312933  | -1.184964801  | 1.813743784   |
| N371  | 2.098293185  | -1.608401494  | 0.779243153   |
| N372  | -6.819360755 | -6.914270980  | -1.606459360  |
| N373  | -9.105510529 | -4.382502685  | -0.105464953  |
| N374  | -9.394853325 | -4.644108317  | 2.700583200   |
| N375  | -6.944217036 | -5.773138310  | 3.475568561   |
| N376  | -5.107659475 | -3.683580856  | 2.773247794   |
| N377  | -6.027792637 | -1.706492502  | 4.596252851   |
| N378  | -5.804811599 | -2.956892158  | 7.195169766   |
| N379  | -3.292733703 | -4.356279008  | 7.392406514   |
| N380  | -1.302971874 | -2.703206782  | 6.401713185   |
| N381  | -1.710273650 | 0.284166630   | 6.696359203   |
| N382  | -2.834754804 | 0.310625357   | 9.308973085   |
| N383  | 4.333554874  | -11.111333209 | 6.692270649   |
| N384  | 5.325345055  | -9.004629516  | 5.360367398   |
| N385  | 4.522123604  | -3.038446890  | 3.677612918   |
| N386  | 3.509389003  | -1.800415021  | 5.391156725   |
| N387  | 4.469173345  | -0.736669182  | 3.552628376   |
| N388  | 8.104153933  | -6.884316280  | 5.568693244   |
| N389  | -5.346747742 | -2.834811977  | -3.808961533  |
| N390  | -1.350203644 | -5.397197376  | -3.268071640  |
| N391  | -5.615832881 | -0.270312505  | -3.143723355  |
| N392  | -8.080901302 | 0.762646371   | -2.413900126  |
| N393  | -7.960475420 | 0.554703841   | 0.386214679   |
| N394  | -5.893664394 | 2.320920172   | 1.182718396   |
| N395  | -2.842291103 | 2.827192909   | -1.739540703  |
| N396  | -2.197887979 | 0.823471611   | -1.087001008  |
| N397  | -6.616126909 | 4.969814567   | 1.541320819   |
| N398  | -9.624229804 | 7.980404548   | -0.558829077  |
| N399  | -9.661997292 | 9.837606159   | 0.654940605   |
| N400  | 8.892971177  | 2.426344679   | 4.185167227   |
| N401  | 6.506190443  | 7.483222528   | 0.887571265   |
| N402  | 5.063878056  | 8.384534074   | -2.249714852  |
| N403  | 2.577958566  | 7.500406170   | -3.183749500  |
| N404  | -1.828610509 | 6.107686281   | -5.032355799  |
| N405  | -1.290249682 | 8.012330924   | -6.286155619  |
| N406  | -2.945817346 | 8.111528568   | -4.668164493  |
| N407  | 1.152831391  | 6.499688005   | -0.910149153  |
| N408  | 1.152120247  | 8.784163587   | 0.728451013   |
| N409  | -0.095750654 | 11.243342800  | 0.056701452   |
| N410  | -0.910191525 | 10.164024953  | -2.884348505  |
| N411  | -2.687378701 | 11.955285390  | 0.696830968   |
| N412  | 5.754596814  | -4.868704957  | -9.332135053  |
| N413  | 3.751056223  | -2.700053532  | -7.257152965  |
| N414  | 2.643225346  | 0.112722573   | -7.002695943  |
| N415  | 4.663967551  | 2.119638681   | -6.675461007  |
| N416  | 0.024050971  | -3.138060857  | -10.156479354 |

|      |               |               |              |
|------|---------------|---------------|--------------|
| N417 | -1.753478260  | -1.247423237  | -8.937474733 |
| N418 | 9.098017920   | -7.084312058  | -4.299199099 |
| N419 | 4.947355106   | -5.845156899  | -3.531101456 |
| N420 | 4.738814807   | -6.765799538  | -5.525147699 |
| N421 | 9.500141309   | -7.598183798  | -1.172755112 |
| N422 | 0.295291949   | 2.292424272   | 0.175775320  |
| N423 | 1.117552081   | 1.675388722   | -0.302644097 |
| O424 | -6.996633129  | -4.980462862  | 0.513550721  |
| O425 | -8.347781999  | -2.634932676  | 2.947610300  |
| O426 | -7.321059286  | -5.061130999  | 5.616337197  |
| O427 | -3.832035433  | -4.410432962  | 4.512056864  |
| O428 | -3.927227983  | -0.834245768  | 4.577827657  |
| O429 | -5.223752351  | -0.881648685  | 7.954913706  |
| O430 | -3.413336414  | -4.105601270  | 9.670378840  |
| O431 | 0.347676969   | -4.193828735  | 6.991466297  |
| O432 | 0.434259261   | -0.015152639  | 7.410472312  |
| O433 | -1.380327558  | 1.993304846   | 9.767104892  |
| O434 | -1.637774209  | -0.042870433  | 12.671957119 |
| O435 | 6.203906702   | -10.305268737 | 3.659700127  |
| O436 | 6.644731421   | -7.374403974  | 7.275862003  |
| O437 | 10.589994975  | -4.568331957  | 6.740697479  |
| O438 | -5.647351313  | -0.704204719  | -0.889702645 |
| O439 | -3.089554316  | -4.483344556  | -4.411456771 |
| O440 | -7.082419252  | 2.696166611   | -1.725219414 |
| O441 | -5.752420421  | 3.190569323   | -4.518793211 |
| O442 | -10.021673461 | 1.554617574   | 0.563995725  |
| O443 | -6.277071215  | 1.832093122   | 3.380850306  |
| O444 | -4.815682510  | 5.291014014   | 2.905371138  |
| O445 | -7.376823816  | 7.550580802   | 3.837571267  |
| O446 | 9.522050144   | -0.407853818  | 6.190063765  |
| O447 | 2.952239397   | 4.974262803   | 4.523835842  |
| O448 | 4.041511545   | 8.621382234   | -0.227592198 |
| O449 | 1.890898475   | 9.671407418   | -3.502065852 |
| O450 | -0.752394178  | 7.078905789   | -2.038406456 |
| O451 | -0.680455934  | 7.977350033   | 1.842269523  |
| O452 | 2.282012777   | 6.131709951   | 1.931405493  |
| O453 | 0.887004112   | 12.278182165  | 1.848078377  |
| O454 | -2.458326201  | 14.024163803  | -0.236341822 |
| O455 | -2.730834820  | 11.533887404  | -2.697599919 |
| O456 | -5.197075657  | 13.802744065  | 2.469039547  |
| O457 | -4.862419106  | 6.976914442   | -2.614106524 |
| O458 | 3.217713368   | -4.710666902  | -8.236645321 |
| O459 | 1.211169918   | -0.902508542  | -8.476478241 |
| O460 | 3.441728331   | 3.547911730   | -7.976711027 |
| O461 | 7.865031783   | 3.605887966   | -7.506860063 |
| O462 | -3.419010305  | -2.693562101  | -9.519617915 |
| O463 | -0.470194192  | -6.589768886  | -5.992069662 |
| O464 | 1.565697304   | -5.830257177  | -6.493987911 |
| O465 | -2.356383247  | 2.267721781   | -8.972503708 |
| O466 | 10.356493403  | -5.569110898  | -1.700566253 |
| O467 | 12.705029141  | -7.101112649  | 0.356840734  |
| O468 | -0.218696148  | -6.388722587  | -0.552361717 |
| O469 | 0.065137996   | -8.372568767  | 0.410799689  |
| O470 | 5.174948574   | -11.082633117 | -2.034062379 |
| O471 | 3.062387351   | -10.926287499 | -2.819136014 |
| O472 | 5.206866881   | -6.045270948  | -0.453854767 |
| O473 | 4.725208832   | -7.658952386  | 1.040267016  |
| O474 | 2.852429441   | -6.174689185  | -1.634989625 |
| O475 | 8.515405611   | -6.664443642  | 2.749438916  |
| O476 | 6.904546674   | -4.730515038  | 1.464278519  |
| O477 | -3.764809976  | 4.730406141   | -3.429799353 |
| O478 | 7.872441224   | -10.571395575 | -0.586247997 |

|                   |                                  |             |              |               |
|-------------------|----------------------------------|-------------|--------------|---------------|
|                   | O479                             | 7.132078263 | -8.764730842 | 1.524898931   |
|                   | S480                             | 4.290418749 | 5.052837772  | -1.611810014  |
|                   | S481                             | 2.695965496 | 1.882057396  | -2.983422216  |
|                   | S482                             | 2.488516282 | -3.366794059 | -2.971219202  |
|                   | S483                             | 3.811654828 | 1.831762498  | 0.478547423   |
|                   | S484                             | 0.840465326 | -0.911175608 | -1.658001202  |
|                   | S485                             | 4.823402717 | -0.787932783 | -4.778519568  |
|                   | S486                             | 3.703206033 | -3.712598574 | 0.398423361   |
|                   | S487                             | 6.165275571 | 1.586457665  | -2.169705335  |
|                   | S488                             | 6.102457878 | -3.227002700 | -2.238285857  |
|                   | S489                             | 6.290634879 | -1.077655350 | 0.843163663   |
| <b>7, 35(3/2)</b> | <b>bm12b6x2n2x6n2nas35.car_1</b> |             |              |               |
| Fe1               | 2.99                             | C1          | -8.001037873 | -5.168814932  |
| Fe2               | -0.62                            | C2          | -8.090202662 | -6.330023045  |
| Fe3               | -2.58                            | C3          | -9.119594162 | -3.191515198  |
| Fe4               | 2.65                             | C4          | -8.917982120 | -3.464485710  |
| Fe5               | -2.34                            | C5          | -9.195728528 | -5.008121411  |
| Fe6               | 0.12                             | C6          | -7.730892615 | -5.274501078  |
| Fe7               | 2.30                             | C7          | -5.515272884 | -5.940571340  |
|                   |                                  | C8          | -4.740582264 | -4.618645078  |
|                   |                                  | C9          | -4.495371567 | -2.362806031  |
|                   |                                  | C10         | -4.789287372 | -1.569216729  |
|                   |                                  | C11         | -6.366394360 | -0.996994482  |
|                   |                                  | C12         | -5.736943926 | -1.604714442  |
|                   |                                  | C13         | -5.409429093 | -3.628057772  |
|                   |                                  | C14         | -3.935217497 | -4.036155806  |
|                   |                                  | C15         | -1.925183974 | -4.851021982  |
|                   |                                  | C16         | -0.846702486 | -3.872003274  |
|                   |                                  | C17         | -0.439984893 | -1.654158808  |
|                   |                                  | C18         | -0.529439709 | -0.390432945  |
|                   |                                  | C19         | -0.735837877 | -1.392238712  |
|                   |                                  | C20         | -0.025947831 | -0.122520824  |
|                   |                                  | C21         | -0.381808657 | -2.629642932  |
|                   |                                  | C22         | -1.861960785 | 1.550251822   |
|                   |                                  | C23         | -2.004841273 | 1.309924498   |
|                   |                                  | C24         | -3.017589632 | 2.394051462   |
|                   |                                  | C25         | -3.249371145 | 3.667526606   |
|                   |                                  | C26         | -2.732687866 | 2.751856580   |
|                   |                                  | C27         | -3.053325216 | 0.043891509   |
|                   |                                  | C28         | -1.753950445 | -0.187782670  |
|                   |                                  | C29         | 4.880088814  | -11.380346064 |
|                   |                                  | C30         | 5.545228296  | -10.164047612 |
|                   |                                  | C31         | 5.871295189  | -7.703173135  |
|                   |                                  | C32         | 6.913489893  | -7.300208135  |
|                   |                                  | C33         | 4.737855737  | -6.668340259  |
|                   |                                  | C34         | 5.224690140  | -5.259848419  |
|                   |                                  | C35         | 4.064253560  | -4.363154604  |
|                   |                                  | C36         | 4.180027960  | -1.858432168  |
|                   |                                  | C37         | 9.204233811  | -6.517248218  |
|                   |                                  | C38         | 9.503653927  | -5.033815544  |
|                   |                                  | C39         | -5.055983243 | -2.528387718  |
|                   |                                  | C40         | -5.479315229 | -1.089698179  |
|                   |                                  | C41         | -3.545802413 | -2.645246177  |
|                   |                                  | C42         | -2.965760110 | -4.072596421  |
|                   |                                  | C43         | -2.473620235 | -4.661746958  |
|                   |                                  | C44         | -5.732768351 | 1.176015282   |
|                   |                                  | C45         | -7.013302353 | 1.624388225   |
|                   |                                  | C46         | -5.576020210 | 1.792428511   |
|                   |                                  | C47         | -9.285802505 | 1.005080691   |
|                   |                                  | C48         | -9.110627124 | 1.075223406   |
|                   |                                  | C49         | -7.642129475 | 0.664254279   |

|      |              |              |              |
|------|--------------|--------------|--------------|
| C50  | -6.541865002 | 1.657077833  | 2.184860632  |
| C51  | -4.855204046 | 3.294238515  | 1.498645665  |
| C52  | -5.431754021 | 4.598805663  | 2.082029932  |
| C53  | -4.044535345 | 3.700052135  | 0.257706050  |
| C54  | -3.291355528 | 2.613635286  | -0.444519368 |
| C55  | -2.900727851 | 1.361253275  | -0.027347820 |
| C56  | -2.178568621 | 1.724770335  | -2.091538383 |
| C57  | -7.189099780 | 6.292652841  | 1.759718717  |
| C58  | -7.435226309 | 6.484432868  | 3.254264400  |
| C59  | -8.517994627 | 6.363843924  | 0.972447443  |
| C60  | -9.044746948 | 7.737122117  | 0.678555220  |
| C61  | -9.060407657 | 8.882943568  | 1.449049877  |
| C62  | -9.991499511 | 9.265561013  | -0.524944213 |
| C63  | 8.367241872  | 1.450053824  | 5.131993183  |
| C64  | 9.295736076  | 0.250387375  | 5.178554730  |
| C65  | 6.982439097  | 0.923178606  | 4.684273599  |
| C66  | 5.918182564  | 1.995831135  | 4.667477737  |
| C67  | 5.151952813  | 2.288290770  | 5.810327078  |
| C68  | 5.660127381  | 2.734055789  | 3.498533289  |
| C69  | 4.158806722  | 3.275290032  | 5.787653684  |
| C70  | 4.680706747  | 3.728047764  | 3.462536018  |
| C71  | 3.926785205  | 3.995959205  | 4.608587562  |
| C72  | 5.879741412  | 7.024948714  | -0.375758532 |
| C73  | 4.908156682  | 8.071498254  | -0.933241772 |
| C74  | 5.151532373  | 5.692789634  | -0.128928414 |
| C75  | 4.189292888  | 9.332291867  | -2.914030116 |
| C76  | 2.772027202  | 8.838015560  | -3.211160947 |
| C77  | 1.259032084  | 6.894049275  | -3.357564371 |
| C78  | 0.461714998  | 6.827755505  | -2.038419737 |
| C79  | 1.427956670  | 5.518926943  | -4.026937402 |
| C80  | 0.157612027  | 4.723100951  | -4.341208966 |
| C81  | -0.729222126 | 5.243933193  | -5.487132997 |
| C82  | -2.029398933 | 7.376142036  | -5.346223655 |
| C83  | 0.443905573  | 6.440295075  | 0.367102542  |
| C84  | 0.244828979  | 7.813124558  | 1.037248829  |
| C85  | 1.114459291  | 5.502037436  | 1.378145616  |
| C86  | 1.314016882  | 9.936796600  | 1.608938230  |
| C87  | 0.687377767  | 11.259599340 | 1.175265782  |
| C88  | -0.609370858 | 12.483253295 | -0.521267796 |
| C89  | -2.008183633 | 12.894531950 | -0.010490747 |
| C90  | -0.580034748 | 12.432909282 | -2.065851860 |
| C91  | -1.508173218 | 11.350910788 | -2.607274506 |
| C92  | -4.068265646 | 12.151270909 | 1.109630252  |
| C93  | -4.164349247 | 13.210252252 | 2.201945794  |
| C94  | -4.657521098 | 10.810401989 | 1.624565652  |
| C95  | -4.742739368 | 9.755958049  | 0.542138864  |
| C96  | -5.843846959 | 9.721523664  | -0.327813116 |
| C97  | -3.719051647 | 8.813639275  | 0.352166158  |
| C98  | -5.918308291 | 8.789525037  | -1.366017371 |
| C99  | -3.763820725 | 7.889165846  | -0.697066661 |
| C100 | -4.867701912 | 7.887339446  | -1.548392274 |
| C101 | 5.550498331  | -4.098367174 | -8.104650692 |
| C102 | 4.066824711  | -3.854072643 | -7.880257993 |
| C103 | 2.404306437  | -2.301526183 | -6.879512719 |
| C104 | 2.021459563  | -0.964648307 | -7.527464992 |
| C105 | 2.420684452  | 1.451861084  | -7.509606927 |
| C106 | 3.572242805  | 2.447530220  | -7.408630269 |
| C107 | 5.749928630  | 3.064073884  | -6.482413545 |
| C108 | 6.835599343  | 2.951222850  | -7.536011054 |
| C109 | -1.171179435 | -3.594379825 | -9.435763128 |
| C110 | -2.215193680 | -2.476747994 | -9.313684874 |
| C111 | -0.934325355 | -4.235041504 | -8.047994511 |

|       |               |               |              |
|-------|---------------|---------------|--------------|
| C112  | -0.184802488  | -5.574852921  | -8.166652448 |
| C113  | 0.277222182   | -6.055404990  | -6.809158261 |
| C114  | -2.668866140  | -0.133818455  | -8.767139582 |
| C115  | -2.055620450  | 1.135898868   | -9.326130290 |
| C116  | -3.264948879  | 0.007727676   | -7.344042126 |
| C117  | -2.181773546  | -0.088820908  | -6.305389648 |
| C118  | -1.396959727  | 1.029288785   | -5.984089051 |
| C119  | -1.836501113  | -1.338932413  | -5.763162753 |
| C120  | -0.243679215  | 0.882109849   | -5.207955724 |
| C121  | -0.680916015  | -1.486050991  | -4.990184950 |
| C122  | 0.137750129   | -0.379364122  | -4.745856618 |
| C123  | 8.557012936   | -6.375909935  | -3.127614475 |
| C124  | 9.521662020   | -6.464265400  | -1.934653774 |
| C125  | 7.148480540   | -6.867813298  | -2.764232190 |
| C126  | 6.075312569   | -6.614450505  | -3.778472111 |
| C127  | 5.941686962   | -7.188254269  | -5.026199037 |
| C128  | 4.155504358   | -5.951216893  | -4.592449828 |
| C129  | 10.401981170  | -7.714003204  | -0.043310450 |
| C130  | 11.840114463  | -7.444789069  | -0.429250597 |
| C131  | 0.526167166   | -7.125967716  | 0.083735478  |
| C132  | 1.924937742   | -6.790524373  | 0.526482697  |
| C133  | 3.012689558   | -7.055682365  | -0.590113599 |
| C134  | 2.918245327   | -8.534924875  | -1.071432784 |
| C135  | 4.066023261   | -8.914335131  | -2.023443507 |
| C136  | 4.185725224   | -10.390256236 | -2.275266511 |
| C137  | 4.411529535   | -6.918350367  | 0.084858321  |
| C138  | 3.897315535   | -0.810544034  | -1.523707944 |
| Fe139 | 4.364052232   | -2.044075690  | -2.996752355 |
| Fe140 | 2.415382194   | 0.710695127   | -1.111179972 |
| Fe141 | 5.213484505   | 0.338431773   | -0.534378806 |
| Fe142 | 4.369735069   | 0.470369279   | -2.959605881 |
| Fe143 | 4.337144200   | 2.692678744   | -1.442320907 |
| Fe144 | 5.042174730   | -2.166156539  | -0.557089444 |
| Fe145 | 2.382008914   | -2.407180052  | -0.802260707 |
| H146  | -6.261540856  | -7.124867813  | -0.776495025 |
| H147  | -6.280031602  | -6.235532576  | -2.145196062 |
| H148  | -9.859319442  | -4.508161216  | -0.779127827 |
| H149  | -8.652385283  | -6.008588105  | -2.087629193 |
| H150  | -8.706109935  | -7.106818820  | -0.711335592 |
| H151  | -8.326536029  | -2.491291753  | 0.434903226  |
| H152  | -9.866789475  | -5.280469131  | 2.066140303  |
| H153  | -10.086509309 | -2.688510584  | 0.598422417  |
| H154  | -9.782989649  | -5.912126390  | 4.302978313  |
| H155  | -7.306381954  | -5.785463580  | 2.517857753  |
| H156  | -9.547059131  | -4.207543252  | 4.757615320  |
| H157  | -3.403126127  | -2.443090290  | 2.713485025  |
| H158  | -5.808973053  | -3.910182961  | 2.068910477  |
| H159  | -5.129775585  | -6.571241013  | 2.848762269  |
| H160  | -6.028703468  | 0.044645811   | 5.756863956  |
| H161  | -6.760823225  | -2.208303754  | 4.086898228  |
| H162  | -5.323448609  | -6.443645988  | 4.616450995  |
| H163  | -4.861154495  | -1.803975386  | 1.917355917  |
| H164  | -6.302843362  | -3.506246171  | 6.489290097  |
| H165  | -7.459104606  | -1.005779102  | 5.941060821  |
| H166  | -0.931946006  | -3.513690841  | 3.883928935  |
| H167  | -0.642742328  | -2.470675217  | 2.471284484  |
| H168  | 0.695869939   | -2.846346597  | 3.572197896  |
| H169  | -1.819997997  | -1.225476606  | 4.267215172  |
| H170  | -6.013632795  | -4.540761419  | 8.531096614  |
| H171  | -2.669715556  | 1.864972654   | 4.716417429  |
| H172  | -3.440848219  | -0.163809913  | 8.627526601  |
| H173  | -3.533854353  | 3.451663645   | 8.689626262  |



|      |               |              |               |
|------|---------------|--------------|---------------|
| H174 | -0.214180548  | 0.036761851  | 2.807996525   |
| H175 | 1.062014585   | -0.190808503 | 4.009129210   |
| H176 | 8.266466103   | 1.830602561  | 6.166835760   |
| H177 | -3.539218485  | 3.386645480  | 4.967569388   |
| H178 | -4.051873515  | 4.262192131  | 7.189559228   |
| H179 | -1.786144102  | 3.310205244  | 5.279402199   |
| H180 | -2.339037683  | 4.287559499  | 7.670687494   |
| H181 | -3.936756621  | 1.782433886  | 6.868561000   |
| H182 | -0.922591428  | 2.114806261  | 7.315550042   |
| H183 | -2.453450921  | -0.005100831 | 6.055808125   |
| H184 | -0.383282138  | 0.767379187  | 4.415734417   |
| H185 | 1.359342129   | 4.551986781  | 0.875116630   |
| H186 | 0.376220759   | 5.298530130  | 2.169759261   |
| H187 | 2.456159860   | 5.708431329  | 2.795318357   |
| H188 | 2.445278345   | 5.008842370  | 5.348388479   |
| H189 | 4.479504341   | 4.268212184  | 2.537464057   |
| H190 | 6.207970759   | 2.502566027  | 2.582845563   |
| H191 | 5.319842055   | 1.731236652  | 6.736292717   |
| H192 | -2.310294369  | -2.578564159 | 6.336437497   |
| H193 | -1.860027041  | -5.741192484 | 6.745182168   |
| H194 | -1.662259984  | -5.148878912 | 8.411870205   |
| H195 | -3.800032492  | -4.373699535 | 6.502522759   |
| H196 | -5.619175933  | -2.973980627 | 9.281741043   |
| H197 | 3.558510596   | 3.475210637  | 6.679115798   |
| H198 | 0.589687842   | -2.016957732 | 5.970345740   |
| H199 | -3.615043713  | 0.847716774  | 11.218284432  |
| H200 | -3.642820617  | -0.882742163 | 10.797216473  |
| H201 | -0.909499372  | -0.562098685 | 10.835642841  |
| H202 | 10.118193365  | -7.073100000 | 6.178300220   |
| H203 | -0.992860407  | -5.838661395 | -4.123936668  |
| H204 | 0.755589613   | -8.847236451 | 0.926476996   |
| H205 | -0.861102594  | -6.332224221 | -8.589063628  |
| H206 | 0.676006351   | -5.466698842 | -8.842938217  |
| H207 | -1.896535729  | -4.405982806 | -7.541368342  |
| H208 | -1.318687042  | 0.965760844  | -10.146154115 |
| H209 | -1.668987516  | -4.346865194 | -10.066354518 |
| H210 | -2.990176599  | -2.053227447 | -2.846434931  |
| H211 | -3.725291309  | -4.765345633 | -1.615372977  |
| H212 | -0.764133945  | -1.121494579 | -8.711541801  |
| H213 | -3.513804360  | -0.339442825 | -9.454599019  |
| H214 | 0.614784038   | -2.544672330 | -9.572475984  |
| H215 | -0.834722455  | -5.537342394 | -2.396734617  |
| H216 | -0.372442986  | -3.525089821 | -7.421662376  |
| H217 | 0.587353330   | -3.950519569 | -10.431501119 |
| H218 | -6.264605294  | -3.273374614 | -3.910505440  |
| H219 | -3.386369532  | -2.168877464 | -1.121688770  |
| H220 | 2.074708811   | -5.372684058 | -7.238608829  |
| H221 | -2.139827370  | -4.077077685 | -1.292454633  |
| H222 | -4.202000337  | 2.868690093  | 2.273286950   |
| H223 | -3.047576323  | 0.823159630  | 0.901847846   |
| H224 | -8.552836230  | 0.973514380  | 2.329480201   |
| H225 | -7.253101627  | 0.139723522  | -0.229854768  |
| H226 | -7.072310071  | 4.348230525  | 0.876112267   |
| H227 | -8.688899402  | 9.097800260  | 2.444976026   |
| H228 | -7.733014962  | 5.545871575  | 3.781560155   |
| H229 | -9.276321490  | 5.748050775  | 1.488365249   |
| H230 | -6.499303680  | 7.079401379  | 1.414382867   |
| H231 | -10.479803688 | 9.811731031  | -1.327649843  |
| H232 | -3.338820922  | 4.482455002  | 0.582752976   |
| H233 | -4.722098969  | 4.175336833  | -0.470130165  |
| H234 | -9.823104455  | 10.813640220 | 0.926411628   |
| H235 | -8.347802071  | 5.883820300  | -0.003829223  |

|      |              |              |              |
|------|--------------|--------------|--------------|
| H236 | -6.184217512 | 2.195419474  | 0.207493190  |
| H237 | -7.351874301 | -0.315127415 | 2.206179813  |
| H238 | -9.763327809 | 1.948895702  | -1.945627784 |
| H239 | -1.679942698 | 1.545462689  | -3.040129416 |
| H240 | -9.990296549 | 0.192293759  | -1.871871862 |
| H241 | 9.680881828  | 2.928195612  | 4.596806729  |
| H242 | 8.179300049  | 3.135409331  | 3.986066585  |
| H243 | 2.101544730  | 6.102553411  | -0.990010957 |
| H244 | -0.565927744 | 6.050339882  | 0.172828508  |
| H245 | 1.991459815  | 8.503649881  | 0.213226869  |
| H246 | -3.349150034 | 4.072406645  | -2.771987337 |
| H247 | -4.998140260 | 3.665019720  | -4.084609427 |
| H248 | -4.196243726 | 5.425977646  | -2.882209039 |
| H249 | -4.580629806 | 1.484931834  | -4.828958174 |
| H250 | -6.332473418 | 1.339485993  | -5.119706823 |
| H251 | 0.461031292  | 12.278032483 | -2.385836979 |
| H252 | -0.925067926 | 13.405327638 | -2.440393223 |
| H253 | 0.101178723  | 10.045507864 | -3.000019127 |
| H254 | -1.507694148 | 9.381245588  | -3.162780146 |
| H255 | -1.477384441 | 8.984382506  | -6.485405165 |
| H256 | -1.189186001 | 4.397143777  | -6.017099613 |
| H257 | -6.790004744 | 8.765179020  | -2.025408136 |
| H258 | -2.861012113 | 8.778832017  | 1.030305284  |
| H259 | -3.537920505 | 7.644427277  | -3.969801004 |
| H260 | 2.058981180  | 4.885555836  | -3.382838278 |
| H261 | 3.332999756  | 6.886701847  | -2.842195039 |
| H262 | -0.454662832 | 4.579026059  | -3.437331545 |
| H263 | -7.946129374 | -0.104666648 | -2.901489362 |
| H264 | 4.650014359  | 9.634906470  | -3.864653554 |
| H265 | -5.442790528 | -0.755370446 | -4.038569057 |
| H266 | 1.992344650  | 5.678445468  | -4.961456844 |
| H267 | -2.931794205 | 7.202571001  | -0.863748479 |
| H268 | 4.078648276  | 10.232021865 | -2.293262318 |
| H269 | -0.799379896 | 7.480536687  | -6.993355212 |
| H270 | -3.367685945 | 8.902861803  | -5.136889460 |
| H271 | -4.629465960 | -3.493269633 | -4.177649406 |
| H272 | -5.597882352 | -3.170634927 | -1.693915734 |
| H273 | -6.666400290 | 10.428312898 | -0.191630424 |
| H274 | -4.921159692 | 1.560134052  | -2.405205431 |
| H275 | 0.680506315  | 7.567306541  | -4.003539779 |
| H276 | -0.114442074 | 5.774950717  | -6.225874886 |
| H277 | 0.501386792  | 3.719437873  | -4.624772755 |
| H278 | -2.511060570 | 5.649836748  | -4.383615282 |
| H279 | 0.888455459  | 9.703232043  | 2.596758118  |
| H280 | -0.117772410 | 10.384488440 | -0.496334474 |
| H281 | 0.059193926  | 13.292169533 | -0.191995499 |
| H282 | 2.387157119  | 10.131036924 | 1.740608987  |
| H283 | -2.254029237 | 11.044968792 | 0.812727942  |
| H284 | 6.080458919  | -3.137037612 | -8.177737602 |
| H285 | 5.914023899  | -4.594217561 | -7.180637312 |
| H286 | 8.507815865  | -5.306763936 | -3.380172418 |
| H287 | 6.711892562  | -5.245925887 | -9.326310504 |
| H288 | 5.133412143  | -5.685206613 | -9.307276185 |
| H289 | 5.894077812  | 4.966077093  | 0.224253974  |
| H290 | 5.749115988  | 7.763029339  | 1.519097605  |
| H291 | 5.746484801  | 7.869606630  | -2.798925477 |
| H292 | 4.390394681  | 5.843714427  | 0.649220191  |
| H293 | 7.054437644  | 8.311652553  | 0.705851668  |
| H294 | 6.199625417  | 2.901809434  | -5.490544203 |
| H295 | 6.687211425  | 6.857917763  | -1.106033016 |
| H296 | 4.176499665  | -6.654831839 | 5.840259425  |
| H297 | 6.356514908  | -7.811121407 | 4.022713757  |

|      |              |               |              |
|------|--------------|---------------|--------------|
| H298 | 4.698298709  | 1.255246173   | -6.115765261 |
| H299 | 4.309021409  | 0.172631729   | 3.961468943  |
| H300 | 2.147699281  | 1.377824503   | -8.570568172 |
| H301 | -0.413543213 | -2.462380966  | -4.579143970 |
| H302 | 1.560233426  | 1.919290692   | -7.000984141 |
| H303 | 3.318905806  | -4.253251556  | 4.907787211  |
| H304 | 3.192029357  | -0.051177209  | -6.133139661 |
| H305 | 3.543975143  | -4.820408046  | 3.252189496  |
| H306 | 4.052237499  | -7.028166872  | 4.107178427  |
| H307 | 5.945158436  | -5.300810848  | 3.712030397  |
| H308 | 5.738864582  | -4.800988630  | 5.403022497  |
| H309 | -4.006122624 | -0.792737201  | -7.208377926 |
| H310 | 4.794127133  | -9.104403920  | 6.231260850  |
| H311 | 4.060836331  | -11.676798780 | 4.683654994  |
| H312 | 1.061755855  | -0.479593026  | -4.181380509 |
| H313 | 5.030003730  | -11.320642775 | 7.410751385  |
| H314 | 3.532160154  | -11.713817469 | 6.875270180  |
| H315 | 4.992834783  | -3.006018825  | 2.769191604  |
| H316 | 0.383907083  | 1.737856635   | -4.953452755 |
| H317 | -2.468416761 | -2.207589112  | -5.960624050 |
| H318 | 7.602392679  | -9.990959124  | 0.166754822  |
| H319 | 7.189934462  | -7.957374309  | -2.584276081 |
| H320 | 6.290585602  | -8.276302787  | 1.277209673  |
| H321 | 7.033908650  | -10.732168908 | -1.063716071 |
| H322 | 6.631312482  | 2.218502674   | -8.354140711 |
| H323 | 6.353498061  | -5.213426219  | 0.791614229  |
| H324 | 2.197495183  | -7.349490112  | 1.433638050  |
| H325 | 4.506132900  | -2.137409510  | -6.844415022 |
| H326 | 2.951614446  | -9.188858410  | -0.185278009 |
| H327 | 4.314155104  | -7.022273072  | -6.409456873 |
| H328 | 3.176503256  | -5.503415921  | -4.715507760 |
| H329 | 5.623373305  | -12.195127264 | 5.324225742  |
| H330 | 4.930857848  | -0.774507325  | 2.610507471  |
| H331 | 8.060877372  | -5.890805230  | 2.321756402  |
| H332 | 7.024614860  | -3.841559298  | 1.071327934  |
| H333 | 8.245840151  | -6.825844682  | 4.532786840  |
| H334 | 3.578494053  | -2.567636705  | 6.039449052  |
| H335 | 3.233499475  | -11.884465583 | -2.940115673 |
| H336 | 3.914041772  | -8.402572768  | -2.985148693 |
| H337 | 5.030953813  | -8.590056399  | -1.618639679 |
| H338 | 1.954408919  | -8.686449467  | -1.578708515 |
| H339 | 2.348673459  | -2.229643907  | -5.782126551 |
| H340 | -1.677024040 | 2.006949699   | -6.382916909 |
| H341 | -3.787782265 | 0.975479560   | -7.305180929 |
| H342 | 1.959945526  | -5.712721266  | 0.733994423  |
| H343 | 8.104621613  | -7.442001308  | 2.284154574  |
| H344 | 6.845197367  | -9.314303030  | 2.295272280  |
| H345 | 3.357836212  | -0.886033906  | 5.809438918  |
| H346 | 6.591676050  | -7.857944927  | -5.576375598 |
| H347 | 6.840089729  | -6.409186710  | -1.817707532 |
| H348 | 1.705717725  | -3.062930631  | -7.230872628 |
| H349 | 5.356617604  | 4.092690916   | -6.507463820 |
| H350 | 6.693605757  | 0.117328633   | 5.375705014  |
| H351 | 7.086551421  | 0.481550053   | 3.680345927  |
| H352 | 10.004102237 | -6.683124564  | -4.549960901 |
| H353 | 9.279474970  | -8.064751627  | -4.057595329 |
| H354 | 10.352834861 | -8.754589981  | 0.314286984  |
| H355 | 8.803529957  | -8.331083244  | -1.308227372 |
| H356 | 12.094217023 | -7.668823384  | -1.493189541 |
| H357 | 10.110257700 | -7.060248733  | 0.794891030  |
| H358 | 9.750631983  | -0.016867192  | 4.194010997  |
| H359 | -3.220472136 | 13.384519024  | 2.772721496  |

|       |              |               |               |
|-------|--------------|---------------|---------------|
| H360  | 8.917409305  | -6.790382490  | 7.467865596   |
| H361  | 8.648652568  | -4.377164537  | 6.145854636   |
| H362  | -4.669264676 | 12.504071469  | 0.255559468   |
| H363  | -4.044146430 | 10.450180221  | 2.465832059   |
| H364  | -5.659599649 | 11.025838272  | 2.023373214   |
| H365  | 1.251034605  | -3.396611251  | -0.562200934  |
| H366  | -5.745008630 | 7.008386488   | -3.048546368  |
| H367  | 0.089916917  | -0.784998598  | -0.525024911  |
| H368  | -1.730668469 | -0.081991725  | -1.102663645  |
| Mo369 | 4.144945821  | -4.489284182  | -1.712276791  |
| N370  | 1.955711297  | -1.185990451  | 1.834805369   |
| N371  | 2.089476801  | -1.616846790  | 0.802320330   |
| N372  | -6.822948398 | -6.915004015  | -1.606237283  |
| N373  | -9.108158217 | -4.382783178  | -0.104838454  |
| N374  | -9.397308361 | -4.640150593  | 2.701897430   |
| N375  | -6.948073869 | -5.772464427  | 3.473074656   |
| N376  | -5.108681584 | -3.684341112  | 2.776330493   |
| N377  | -6.031254118 | -1.708520493  | 4.600314857   |
| N378  | -5.806208546 | -2.958482516  | 7.196872361   |
| N379  | -3.291580273 | -4.354551375  | 7.392196972   |
| N380  | -1.301688629 | -2.699869521  | 6.400993116   |
| N381  | -1.712825714 | 0.287147386   | 6.695568322   |
| N382  | -2.840384399 | 0.308505313   | 9.306141348   |
| N383  | 4.334732213  | -11.110398080 | 6.691683581   |
| N384  | 5.327194663  | -9.005164080  | 5.360446302   |
| N385  | 4.525618176  | -3.040881284  | 3.679571590   |
| N386  | 3.509186943  | -1.795560509  | 5.384113418   |
| N387  | 4.468458815  | -0.738889285  | 3.543000014   |
| N388  | 8.105150465  | -6.883892729  | 5.564623097   |
| N389  | -5.344551917 | -2.837742904  | -3.816874167  |
| N390  | -1.347290241 | -5.399594084  | -3.269079297  |
| N391  | -5.613301690 | -0.274091362  | -3.144383497  |
| N392  | -8.072201689 | 0.776453704   | -2.409713301  |
| N393  | -7.962734595 | 0.553952005   | 0.389430355   |
| N394  | -5.898506802 | 2.322129817   | 1.181305944   |
| N395  | -2.834737310 | 2.826418979   | -1.737411255  |
| N396  | -2.210955939 | 0.814785913   | -1.088436671  |
| N397  | -6.618084409 | 4.974034334   | 1.537355083   |
| N398  | -9.630192574 | 7.989357538   | -0.552443677  |
| N399  | -9.663724723 | 9.844530035   | 0.664567430   |
| N400  | 8.893663674  | 2.427386694   | 4.177154863   |
| N401  | 6.498830836  | 7.469451443   | 0.883745730   |
| N402  | 5.061081972  | 8.383009787   | -2.251147152  |
| N403  | 2.575771870  | 7.502301152   | -3.180038413  |
| N404  | -1.829327071 | 6.101984731   | -5.031040292  |
| N405  | -1.284814849 | 8.009750805   | -6.277428728  |
| N406  | -2.946500741 | 8.106357657   | -4.665996078  |
| N407  | 1.152055547  | 6.503407502   | -0.909746751  |
| N408  | 1.153038814  | 8.786083836   | 0.730748595   |
| N409  | -0.096514540 | 11.243660393  | 0.055773275   |
| N410  | -0.913069081 | 10.162934912  | -2.888115859  |
| N411  | -2.687675866 | 11.957102658  | 0.693600522   |
| N412  | 5.759535810  | -4.874980199  | -9.330375139  |
| N413  | 3.753783281  | -2.702480321  | -7.258195982  |
| N414  | 2.644656595  | 0.109756727   | -7.004848975  |
| N415  | 4.666814055  | 2.117036523   | -6.675689288  |
| N416  | 0.022124730  | -3.142754176  | -10.161775092 |
| N417  | -1.754317795 | -1.249075728  | -8.946206539  |
| N418  | 9.095242201  | -7.086839310  | -4.304319331  |
| N419  | 4.945439010  | -5.835942649  | -3.527171137  |
| N420  | 4.730216216  | -6.755498740  | -5.521329636  |
| N421  | 9.501750753  | -7.598803551  | -1.179053608  |

|      |               |               |              |
|------|---------------|---------------|--------------|
| N422 | 0.304570650   | 2.285907690   | 0.174590591  |
| N423 | 1.113171074   | 1.684157612   | -0.347369256 |
| O424 | -7.001274652  | -4.984757761  | 0.516111247  |
| O425 | -8.347481500  | -2.632239544  | 2.945951913  |
| O426 | -7.320916911  | -5.064961856  | 5.615993416  |
| O427 | -3.831794195  | -4.419982044  | 4.510643693  |
| O428 | -3.928236054  | -0.843241230  | 4.592207070  |
| O429 | -5.237069226  | -0.881773836  | 7.962280813  |
| O430 | -3.410839523  | -4.100832884  | 9.669932964  |
| O431 | 0.349156302   | -4.189478526  | 6.992339631  |
| O432 | 0.429644603   | -0.013017935  | 7.416373080  |
| O433 | -1.388487902  | 1.992409716   | 9.768419167  |
| O434 | -1.642775984  | -0.044862272  | 12.668497207 |
| O435 | 6.205358298   | -10.304908079 | 3.658920320  |
| O436 | 6.647916544   | -7.372380052  | 7.274241004  |
| O437 | 10.588242062  | -4.568187221  | 6.751537464  |
| O438 | -5.657185629  | -0.717405656  | -0.891950997 |
| O439 | -3.088992824  | -4.490803781  | -4.413718752 |
| O440 | -7.051438255  | 2.689872522   | -1.697638310 |
| O441 | -5.761204653  | 3.189863764   | -4.510718577 |
| O442 | -10.015495574 | 1.570989321   | 0.565209124  |
| O443 | -6.263445127  | 1.819710435   | 3.379772198  |
| O444 | -4.818775967  | 5.291049336   | 2.903565736  |
| O445 | -7.369744257  | 7.553825599   | 3.837192311  |
| O446 | 9.524997621   | -0.404572328  | 6.185569480  |
| O447 | 2.956474537   | 4.973330964   | 4.519068283  |
| O448 | 4.042515337   | 8.620839672   | -0.227113354 |
| O449 | 1.889431906   | 9.673447119   | -3.497330572 |
| O450 | -0.753925710  | 7.083102991   | -2.036306583 |
| O451 | -0.679211185  | 7.979973261   | 1.845411516  |
| O452 | 2.286355880   | 6.119624411   | 1.923143569  |
| O453 | 0.883799519   | 12.280564549  | 1.847181483  |
| O454 | -2.454857959  | 14.028262489  | -0.233951461 |
| O455 | -2.733077244  | 11.532817344  | -2.694311504 |
| O456 | -5.197249406  | 13.803606080  | 2.467584408  |
| O457 | -4.871019397  | 6.975304535   | -2.613385618 |
| O458 | 3.221035283   | -4.714354746  | -8.237899710 |
| O459 | 1.214211427   | -0.905499184  | -8.481679306 |
| O460 | 3.450504159   | 3.540653894   | -7.987752910 |
| O461 | 7.865709887   | 3.605357340   | -7.509019403 |
| O462 | -3.420821287  | -2.696606575  | -9.522140765 |
| O463 | -0.467265616  | -6.589511979  | -5.992080407 |
| O464 | 1.568085130   | -5.829323634  | -6.494800329 |
| O465 | -2.361559290  | 2.266315143   | -8.976207990 |
| O466 | 10.355442133  | -5.568470646  | -1.705457468 |
| O467 | 12.696541873  | -7.090546851  | 0.369203752  |
| O468 | -0.221015324  | -6.395985491  | -0.549141019 |
| O469 | 0.066908737   | -8.378262536  | 0.417567962  |
| O470 | 5.175892542   | -11.079122101 | -2.040317650 |
| O471 | 3.060371730   | -10.926771415 | -2.817257063 |
| O472 | 5.212739899   | -6.056454594  | -0.454341070 |
| O473 | 4.722447984   | -7.668387515  | 1.039399357  |
| O474 | 2.852602517   | -6.161439887  | -1.626654674 |
| O475 | 8.514434983   | -6.662474043  | 2.745393096  |
| O476 | 6.901020264   | -4.731243323  | 1.459373670  |
| O477 | -3.770116688  | 4.730426572   | -3.429128662 |
| O478 | 7.875552548   | -10.569542166 | -0.589905443 |
| O479 | 7.131972052   | -8.763532693  | 1.522448484  |
| S480 | 4.300578960   | 5.015897079   | -1.630936042 |
| S481 | 2.704132722   | 1.996960427   | -2.965591464 |
| S482 | 2.513347630   | -3.341851103  | -2.941086553 |
| S483 | 3.806572464   | 1.713392419   | 0.493315834  |

|                   |                                    |             |               |               |
|-------------------|------------------------------------|-------------|---------------|---------------|
|                   | S484                               | 0.869165274 | -0.913097715  | -1.640270449  |
|                   | S485                               | 4.820257594 | -0.784092982  | -4.772640652  |
|                   | S486                               | 3.728501173 | -3.709003897  | 0.431515098   |
|                   | S487                               | 6.210294321 | 1.556892790   | -2.121930270  |
|                   | S488                               | 6.114843761 | -3.223228409  | -2.204300716  |
|                   | S489                               | 6.327693460 | -1.032955518  | 0.836472324   |
| <b>8, 47(3/2)</b> | <b>bm22b2n2x6x6n2ncnxdtr.car_3</b> |             |               |               |
| Fe1               | 2.86                               | C1          | 2.011406082   | 0.661737048   |
| Fe2               | -1.17                              | C2          | 3.375613270   | 0.178647804   |
| Fe3               | 2.75                               | C3          | 0.289225886   | 2.403860015   |
| Fe4               | -2.34                              | C4          | -0.941426594  | 1.536051043   |
| Fe5               | 2.52                               | C5          | -2.013873167  | -0.151848772  |
| Fe6               | -0.01                              | C6          | -2.196768292  | -1.278397570  |
| Fe7               | -2.04                              | C7          | -1.123283955  | -2.730747979  |
|                   |                                    | C8          | -1.646950946  | -2.162218011  |
|                   |                                    | C9          | -1.700971417  | -0.275939558  |
|                   |                                    | C10         | -3.203263372  | 0.043746755   |
|                   |                                    | C11         | -5.117474228  | 0.681319986   |
|                   |                                    | C12         | -5.989232237  | -0.582073972  |
|                   |                                    | C13         | -6.393569096  | -2.742795166  |
|                   |                                    | C14         | -6.280900686  | -3.937738110  |
|                   |                                    | C15         | -4.820535210  | -5.260698862  |
|                   |                                    | C16         | -4.710796254  | -4.968688723  |
|                   |                                    | C17         | -4.656111004  | -3.156202647  |
|                   |                                    | C18         | -5.969514810  | -2.485499685  |
|                   |                                    | C19         | -3.413206402  | -2.248050716  |
|                   |                                    | C20         | -3.454181950  | -1.500873977  |
|                   |                                    | C21         | -2.129987456  | -3.066029570  |
|                   |                                    | C22         | -7.453610158  | -0.538964877  |
|                   |                                    | C23         | -8.750250792  | -1.170131965  |
|                   |                                    | C24         | -7.297893817  | 0.949353309   |
|                   |                                    | C25         | -8.572449717  | 1.743567584   |
|                   |                                    | C26         | -6.095162904  | 1.579980350   |
|                   |                                    | C27         | -9.933052375  | -2.144138347  |
|                   |                                    | C28         | -10.426955018 | -3.345375647  |
|                   |                                    | C29         | -0.050497448  | -13.175602408 |
|                   |                                    | C30         | 0.061265276   | -12.404801214 |
|                   |                                    | C31         | -1.183634558  | -10.820831026 |
|                   |                                    | C32         | -2.282760882  | -11.478661676 |
|                   |                                    | C33         | -1.538694102  | -9.372178103  |
|                   |                                    | C34         | -1.770739203  | -8.472511397  |
|                   |                                    | C35         | -1.819646162  | -6.998473827  |
|                   |                                    | C36         | -2.923504929  | -5.221016389  |
|                   |                                    | C37         | -2.864215099  | -12.331859339 |
|                   |                                    | C38         | -3.441978498  | -11.397318174 |
|                   |                                    | C39         | 2.995113651   | 1.758421630   |
|                   |                                    | C40         | 2.134820567   | 2.981385473   |
|                   |                                    | C41         | 2.832825127   | 0.734906875   |
|                   |                                    | C42         | 3.357526453   | -0.689173822  |
|                   |                                    | C43         | 4.824274096   | -0.922184963  |
|                   |                                    | C44         | 2.216952394   | 5.233609983   |
|                   |                                    | C45         | 1.518866950   | 6.158230774   |
|                   |                                    | C46         | 3.181407342   | 6.037657706   |
|                   |                                    | C47         | 0.730190639   | 6.432233348   |
|                   |                                    | C48         | -0.697979816  | 5.866767292   |
|                   |                                    | C49         | -2.225676479  | 4.077596660   |
|                   |                                    | C50         | -2.971498142  | 4.101492705   |
|                   |                                    | C51         | -2.921035558  | 4.567722853   |
|                   |                                    | C52         | -3.995859809  | 5.677022781   |
|                   |                                    | C53         | -1.913858731  | 4.857319038   |
|                   |                                    | C54         | -0.787926801  | 3.890751305   |

|      |              |              |              |
|------|--------------|--------------|--------------|
| C55  | -0.596148510 | 2.569565295  | -1.592194528 |
| C56  | 1.189195441  | 3.250913794  | -0.451298746 |
| C57  | -4.473793313 | 8.035536723  | -3.043650328 |
| C58  | -5.923012219 | 7.803664959  | -3.467147864 |
| C59  | -3.804288645 | 9.100465402  | -3.942670711 |
| C60  | -4.091429801 | 10.533101320 | -3.598104237 |
| C61  | -5.260181078 | 11.148583741 | -3.193709661 |
| C62  | -3.614623872 | 12.626635428 | -3.327342974 |
| C63  | -5.007686909 | -5.462722231 | 6.576714124  |
| C64  | -4.520782877 | -6.895807752 | 6.692906904  |
| C65  | -4.421888271 | -4.902607799 | 5.260576375  |
| C66  | -4.872182588 | -3.492274310 | 4.957261992  |
| C67  | -6.057485181 | -3.244564816 | 4.239612560  |
| C68  | -4.106868999 | -2.385983376 | 5.365143091  |
| C69  | -6.465290913 | -1.940615844 | 3.937279530  |
| C70  | -4.504016052 | -1.079503521 | 5.077654943  |
| C71  | -5.685177225 | -0.858053404 | 4.362606248  |
| C72  | -2.331853787 | 2.107817504  | 8.605644055  |
| C73  | -2.269175917 | 3.631904340  | 8.443838952  |
| C74  | -2.068928871 | 1.419471900  | 7.258180799  |
| C75  | -1.010014379 | 5.687195990  | 8.910660022  |
| C76  | -0.575135170 | 6.217750584  | 7.543841293  |
| C77  | 0.281466325  | 5.660339882  | 5.297583690  |
| C78  | -0.901692772 | 5.555833105  | 4.311091982  |
| C79  | 1.490995598  | 4.806477077  | 4.878037362  |
| C80  | 2.086632835  | 5.055110141  | 3.488577071  |
| C81  | 2.863421882  | 6.368155095  | 3.279650578  |
| C82  | 1.805980778  | 8.637840192  | 3.271487562  |
| C83  | -2.948650847 | 4.419955068  | 3.628341339  |
| C84  | -4.132131205 | 5.317325346  | 4.041481832  |
| C85  | -3.466546868 | 2.980217713  | 3.508900002  |
| C86  | -5.490909728 | 6.086200658  | 5.922946646  |
| C87  | -5.670652790 | 7.577683693  | 6.189701556  |
| C88  | -4.681745522 | 9.830311880  | 6.107937619  |
| C89  | -5.375669885 | 10.729253365 | 5.061507202  |
| C90  | -3.256779916 | 10.346887356 | 6.410600014  |
| C91  | -2.347952501 | 10.242019311 | 5.192022573  |
| C92  | -6.198832944 | 10.913810266 | 2.755424132  |
| C93  | -7.628082570 | 11.371032013 | 3.028283290  |
| C94  | -6.153470077 | 10.065424367 | 1.456586549  |
| C95  | -4.738119110 | 9.726468814  | 1.046548012  |
| C96  | -3.967356056 | 10.652618399 | 0.325778205  |
| C97  | -4.139262069 | 8.510895293  | 1.419645492  |
| C98  | -2.635073407 | 10.388365396 | 0.002962514  |
| C99  | -2.799873145 | 8.237725800  | 1.124661305  |
| C100 | -2.061278378 | 9.188388600  | 0.423926608  |
| C101 | 9.280499674  | -3.217484564 | 4.098013628  |
| C102 | 8.906496143  | -2.308093887 | 2.940244446  |
| C103 | 7.293802481  | -0.587351693 | 2.162599632  |
| C104 | 7.300592094  | 0.864085003  | 2.659227038  |
| C105 | 6.304817141  | 2.442854005  | 4.242372570  |
| C106 | 5.853542808  | 2.518100665  | 5.698252494  |
| C107 | 4.869675501  | 1.437066099  | 7.658585872  |
| C108 | 5.903015170  | 1.129590934  | 8.726006925  |
| C109 | 10.020390430 | 1.345072720  | -0.938073771 |
| C110 | 9.428413348  | 2.726610571  | -1.248322192 |
| C111 | 9.020003376  | 0.243504693  | -1.354706444 |
| C112 | 9.698271834  | -1.138049083 | -1.421530585 |
| C113 | 8.662141147  | -2.230446677 | -1.563050946 |
| C114 | 7.915731122  | 4.518582664  | -0.555305744 |
| C115 | 7.908377929  | 5.348874225  | 0.713160900  |
| C116 | 6.546358268  | 4.419007959  | -1.271929278 |

|       |              |               |               |
|-------|--------------|---------------|---------------|
| C117  | 5.659958639  | 3.394075451   | -0.618347391  |
| C118  | 4.917312778  | 3.710892025   | 0.531266223   |
| C119  | 5.677309004  | 2.061177252   | -1.065462595  |
| C120  | 4.269613155  | 2.701247394   | 1.249936587   |
| C121  | 5.028851644  | 1.052978713   | -0.346776492  |
| C122  | 4.348828812  | 1.369703240   | 0.833105758   |
| C123  | 5.775655322  | -8.419107522  | 4.414016169   |
| C124  | 4.769064180  | -9.460360676  | 4.932789989   |
| C125  | 5.612534947  | -8.152476364  | 2.909755318   |
| C126  | 6.383646030  | -6.992531103  | 2.355198478   |
| C127  | 7.753416465  | -6.885160810  | 2.219100759   |
| C128  | 6.786043455  | -5.132978928  | 1.269652108   |
| C129  | 3.597896882  | -11.570710444 | 4.634229297   |
| C130  | 3.923145530  | -12.054750866 | 6.029753523   |
| C131  | 2.868370622  | -5.665287619  | -3.291476589  |
| C132  | 2.387979692  | -6.356537247  | -2.044960666  |
| C133  | 3.564578617  | -6.751930981  | -1.065858967  |
| C134  | 4.607212833  | -7.629116624  | -1.822186929  |
| C135  | 5.673529614  | -8.214754405  | -0.880129957  |
| C136  | 6.506061195  | -9.294173288  | -1.511316430  |
| C137  | 2.958979944  | -7.667978220  | 0.040213521   |
| C138  | 1.864918149  | -2.247592757  | 3.138815659   |
| Fe139 | 3.771323357  | -2.869549091  | 3.108875271   |
| Fe140 | 0.817366630  | -0.305071763  | 2.678231879   |
| Fe141 | 0.500534936  | -2.464234146  | 4.542454389   |
| Fe142 | 2.666889038  | -1.090008606  | 4.527463825   |
| Fe143 | 0.460303624  | 0.203841988   | 5.260787841   |
| Fe144 | 1.644498331  | -4.225137954  | 3.171177801   |
| Fe145 | 1.785653851  | -2.879711450  | 0.855156783   |
| H146  | 3.387824911  | -1.590822037  | -8.748521932  |
| H147  | 4.276154055  | -0.425883697  | -8.027438677  |
| H148  | 2.162030264  | 2.364844707   | -10.411475235 |
| H149  | 4.043879349  | 1.042981511   | -9.899261840  |
| H150  | 3.208178245  | -0.239020751  | -10.770414207 |
| H151  | 0.301043838  | 2.595033868   | -8.295649333  |
| H152  | -0.087621868 | 0.762142075   | -11.341301889 |
| H153  | 0.154449987  | 3.362504056   | -9.897187135  |
| H154  | -1.839118859 | -0.597796310  | -12.032623934 |
| H155  | -0.191365707 | -1.242829657  | -9.581436020  |
| H156  | -2.961169865 | 0.401955103   | -11.078183725 |
| H157  | -1.551787151 | -0.916685390  | -4.622055779  |
| H158  | -0.479618967 | -0.468587867  | -7.265347490  |
| H159  | -0.115778916 | -3.141188096  | -8.213824436  |
| H160  | -5.468586396 | 1.295098982   | -6.072899915  |
| H161  | -3.063990082 | 0.581899656   | -7.554919773  |
| H162  | -1.790868290 | -3.552644370  | -8.653211915  |
| H163  | -1.131560283 | 0.652760883   | -5.350351550  |
| H164  | -4.712858911 | -1.460480206  | -8.322009173  |
| H165  | -5.271901034 | 1.238905389   | -7.846072756  |
| H166  | -2.106159913 | -3.546862293  | -3.399082573  |
| H167  | -1.244950448 | -2.415787056  | -2.327692169  |
| H168  | -2.037988130 | -3.846702751  | -1.641137918  |
| H169  | -3.444310145 | -1.496018060  | -3.031185279  |
| H170  | -6.155724493 | -3.106032940  | -9.040914128  |
| H171  | -5.146265781 | 1.093910018   | -2.112875218  |
| H172  | -7.950636738 | -1.349212555  | -4.616410009  |
| H173  | -9.441460438 | 1.368654043   | -2.816030947  |
| H174  | -2.520760663 | -0.939893252  | -0.738611418  |
| H175  | -3.552855792 | -2.193029965  | -0.042389206  |
| H176  | -6.109498187 | -5.501077134  | 6.467570566   |
| H177  | -6.010176656 | 2.642274437   | -2.117962713  |
| H178  | -8.422408740 | 2.799429651   | -2.527906613  |



|      |               |               |              |
|------|---------------|---------------|--------------|
| H179 | -6.221957295  | 1.517566716   | -0.752721408 |
| H180 | -8.813490851  | 1.699358984   | -1.183055011 |
| H181 | -7.119091554  | 0.987475494   | -3.652671834 |
| H182 | -7.543894502  | -0.608810913  | -1.070947597 |
| H183 | -5.608687368  | -0.878952881  | -3.213600055 |
| H184 | -4.287693214  | -0.785716891  | -0.849010847 |
| H185 | -2.611315875  | 2.304667363   | 3.346744799  |
| H186 | -4.116101705  | 2.945371336   | 2.618925687  |
| H187 | -4.796272099  | 1.884614023   | 4.443497462  |
| H188 | -6.835080300  | 0.478548182   | 3.547053608  |
| H189 | -3.882818162  | -0.235081603  | 5.378332078  |
| H190 | -3.158553524  | -2.545417350  | 5.883061466  |
| H191 | -6.669808236  | -4.083886898  | 3.896974205  |
| H192 | -4.868964008  | -2.985681331  | -4.517687648 |
| H193 | -3.881765627  | -5.747639456  | -5.906483532 |
| H194 | -5.637738276  | -5.981706002  | -5.737899454 |
| H195 | -4.280765919  | -3.517001428  | -6.695452157 |
| H196 | -7.447967621  | -2.438076455  | -8.020197588 |
| H197 | -7.379692805  | -1.768903596  | 3.363432687  |
| H198 | -4.552863997  | -4.040528439  | -1.751063993 |
| H199 | -10.756895474 | -1.416625797  | -4.671888894 |
| H200 | -9.683888065  | -2.494636234  | -5.595532609 |
| H201 | -9.646374178  | -3.874101264  | -3.202254010 |
| H202 | -2.377968718  | -13.183880101 | 3.431280923  |
| H203 | 6.098389777   | -2.340047398  | -3.038246447 |
| H204 | 2.788289088   | -7.375130054  | -4.180656283 |
| H205 | 10.359247704  | -1.174290433  | -2.299997134 |
| H206 | 10.308873117  | -1.306925641  | -0.522769908 |
| H207 | 8.589648935   | 0.474658738   | -2.341781809 |
| H208 | 8.762178347   | 5.145018954   | 1.400909528  |
| H209 | 10.886365401  | 1.279541513   | -1.614867741 |
| H210 | 3.313418315   | 1.145635673   | -2.968098863 |
| H211 | 3.234140839   | -0.941391974  | -5.211031433 |
| H212 | 8.330903296   | 2.702714190   | 0.514092221  |
| H213 | 8.596452042   | 5.074009001   | -1.231386426 |
| H214 | 9.780807191   | 1.198679639   | 1.118067941  |
| H215 | 4.412166891   | -2.845586821  | -3.108413848 |
| H216 | 8.181702925   | 0.234405294   | -0.641913115 |
| H217 | 11.134481021  | 0.456654665   | 0.539484524  |
| H218 | 4.599691789   | 2.281671468   | -6.211543847 |
| H219 | 1.755398041   | 0.659487973   | -3.664585512 |
| H220 | 8.845317626   | -2.577235422  | 0.366458588  |
| H221 | 2.733967992   | -1.408615345  | -3.593181178 |
| H222 | -3.441696702  | 3.615278029   | -2.405373885 |
| H223 | -1.223358132  | 1.864764803   | -2.125444002 |
| H224 | -2.862880999  | 4.591814282   | -7.055955300 |
| H225 | -0.139436911  | 4.225789398   | -5.887658863 |
| H226 | -2.938187501  | 6.768925791   | -3.837754294 |
| H227 | -6.257869539  | 10.769432297  | -3.000287839 |
| H228 | -6.039608973  | 7.080407771   | -4.310584715 |
| H229 | -4.058584181  | 8.892416681   | -4.997635461 |
| H230 | -4.465503572  | 8.361077582   | -1.991296302 |
| H231 | -3.105417575  | 13.586131628  | -3.278490467 |
| H232 | -2.491771708  | 4.903410055   | -0.518755245 |
| H233 | -1.490197602  | 5.863133249   | -1.611088547 |
| H234 | -5.570892167  | 13.211910119  | -2.724689300 |
| H235 | -2.713961009  | 8.971894674   | -3.857806328 |
| H236 | -1.281080706  | 4.708036526   | -3.971582376 |
| H237 | -2.150011665  | 3.029287093   | -6.649213187 |
| H238 | 0.643846350   | 7.509869609   | -6.817798065 |
| H239 | 2.152092146   | 3.242038460   | 0.055472946  |
| H240 | 1.179164119   | 6.296240116   | -7.996872646 |

|      |              |               |              |
|------|--------------|---------------|--------------|
| H241 | -5.108068138 | -4.922755915  | 8.549774246  |
| H242 | -4.682461135 | -3.697094293  | 7.556734189  |
| H243 | -1.533521458 | 3.753631641   | 5.129060664  |
| H244 | -2.650717850 | 4.754091063   | 2.624428635  |
| H245 | -3.599672631 | 5.155317256   | 6.016444781  |
| H246 | 0.523412170  | 5.260681180   | -0.204613323 |
| H247 | 1.580788581  | 7.018073035   | -0.630574391 |
| H248 | 0.223166475  | 7.535917944   | 0.023855921  |
| H249 | 3.609387231  | 5.372129595   | -2.038829335 |
| H250 | 4.006668236  | 6.446527224   | -3.408470524 |
| H251 | -2.859804832 | 9.779081137   | 7.264684166  |
| H252 | -3.339173621 | 11.404143263  | 6.693857613  |
| H253 | -1.372813885 | 8.530600890   | 5.951150140  |
| H254 | -1.009134233 | 8.982907841   | 4.303174490  |
| H255 | 2.203563090  | 9.940947461   | 4.804351350  |
| H256 | 3.697455394  | 6.199687180   | 2.581998633  |
| H257 | -2.049018474 | 11.113067636  | -0.568029063 |
| H258 | -4.717603829 | 7.745752594   | 1.945788686  |
| H259 | 0.332333110  | 9.149822477   | 1.921777415  |
| H260 | 1.206403874  | 3.743269362   | 4.928304411  |
| H261 | -0.130067583 | 4.307793579   | 6.901966225  |
| H262 | 1.315153256  | 4.953314456   | 2.709490684  |
| H263 | 2.192795104  | 5.044969900   | -6.263335209 |
| H264 | -0.255653728 | 5.998190878   | 9.646155622  |
| H265 | 3.872237722  | 3.917390494   | -4.327351856 |
| H266 | 2.275593332  | 4.957220515   | 5.637523571  |
| H267 | -2.333489494 | 7.314386406   | 1.474747948  |
| H268 | 1.845339896  | 7.457228850   | -2.787644544 |
| H269 | -1.950120744 | 6.200206092   | 9.156195681  |
| H270 | 3.324792430  | 8.625756458   | 4.668414722  |
| H271 | 0.892921948  | 10.433030292  | 2.928806996  |
| H272 | 5.016588877  | 1.417006539   | -4.841347377 |
| H273 | 2.531618341  | 1.318890060   | -5.924154171 |
| H274 | -4.412769479 | 11.597675005  | 0.005492501  |
| H275 | 1.389006337  | 4.878611841   | -3.060226576 |
| H276 | 0.551154754  | 6.725225615   | 5.304380093  |
| H277 | 3.312102532  | 6.690735374   | 4.227791592  |
| H278 | 2.795311750  | 4.232700258   | 3.321722649  |
| H279 | 1.600347856  | 7.252171349   | 1.806531526  |
| H280 | -6.307406916 | 5.787735964   | 5.248091836  |
| H281 | -3.813729082 | 7.981563011   | 5.417258063  |
| H282 | -5.284468093 | 9.940222188   | 7.021119290  |
| H283 | -5.647901361 | 5.575702300   | 6.882870170  |
| H284 | -5.409592485 | 9.174706504   | 3.739215516  |
| H285 | 8.947651409  | -2.774609835  | 5.047676472  |
| H286 | 8.694369066  | -4.148839505  | 3.952411325  |
| H287 | 5.547096024  | -7.496634355  | 4.967104221  |
| H288 | 10.943722950 | -4.195932101  | 4.761241067  |
| H289 | 11.038253728 | -3.712413228  | 3.198623237  |
| H290 | -2.052550252 | 0.334754577   | 7.425594336  |
| H291 | -4.366823577 | 2.077000487   | 8.529634054  |
| H292 | -0.473597609 | 3.687309116   | 9.447368518  |
| H293 | -2.882930196 | 1.665966875   | 6.560937264  |
| H294 | -3.782157674 | 2.053035667   | 10.056307987 |
| H295 | 4.038545002  | 0.719793743   | 7.747833053  |
| H296 | -1.557107031 | 1.786497201   | 9.319377369  |
| H297 | -2.430810737 | -9.378393482  | -1.169542392 |
| H298 | -0.231887247 | -10.828020251 | 0.399402405  |
| H299 | 5.278926370  | 0.515329383   | 5.789255138  |
| H300 | -3.502934126 | -3.678068746  | 2.903069115  |
| H301 | 7.286780996  | 2.931193334   | 4.182250839  |
| H302 | 5.062279370  | 0.017940908   | -0.693717036 |

|      |              |               |              |
|------|--------------|---------------|--------------|
| H303 | 5.606016945  | 3.076641154   | 3.671001487  |
| H304 | -2.637575227 | -6.802595340  | -0.411064883 |
| H305 | 5.723546971  | 0.376564545   | 3.854302986  |
| H306 | -0.884934487 | -6.718643988  | -0.217393026 |
| H307 | -0.698541796 | -8.984011245  | -1.119843604 |
| H308 | -0.951900638 | -8.600688003  | 1.419428225  |
| H309 | -2.708853948 | -8.745053055  | 1.204301896  |
| H310 | 6.737726927  | 4.148400985   | -2.320625567 |
| H311 | -1.768637144 | -11.704243434 | -2.022367525 |
| H312 | 0.657358543  | -12.696370739 | -3.631871838 |
| H313 | 3.871911829  | 0.595448567   | 1.431837200  |
| H314 | -1.945446460 | -13.941656761 | -3.197731186 |
| H315 | -1.342106976 | -13.222309461 | -4.539793671 |
| H316 | -1.136373182 | -6.057952563  | 2.070738429  |
| H317 | 3.710860459  | 2.929009777   | 2.158353775  |
| H318 | 6.218933656  | 1.804709763   | -1.978491872 |
| H319 | 4.226074167  | -11.787666777 | 1.063518132  |
| H320 | 5.924364816  | -9.056737351  | 2.356917285  |
| H321 | 2.469122863  | -10.172375736 | 0.653111464  |
| H322 | 5.630791194  | -11.596425021 | 0.447279248  |
| H323 | 6.949656394  | 1.005508240   | 8.356450401  |
| H324 | 1.700201129  | -7.750897876  | 2.419174881  |
| H325 | 1.800335082  | -7.253622129  | -2.289339994 |
| H326 | 7.294866751  | -1.619205287  | 4.002546671  |
| H327 | 4.070887637  | -8.452492681  | -2.319381658 |
| H328 | 8.888753599  | -5.351246933  | 1.245452529  |
| H329 | 6.675168063  | -4.210999990  | 0.713343008  |
| H330 | 0.339491380  | -14.188835513 | -2.741676163 |
| H331 | -1.871254426 | -4.280336658  | 3.195198720  |
| H332 | 0.609018685  | -9.755264392  | 3.168764766  |
| H333 | 0.892349997  | -7.185298397  | 3.618685068  |
| H334 | -1.033618889 | -11.343626307 | 2.369665780  |
| H335 | -4.327073798 | -6.045510643  | 0.436355710  |
| H336 | 7.695847225  | -9.631203434  | -2.943143736 |
| H337 | 6.334972488  | -7.403797326  | -0.542106083 |
| H338 | 5.209310671  | -8.662418692  | 0.005494724  |
| H339 | 5.094869304  | -7.015119799  | -2.593240361 |
| H340 | 6.266535198  | -0.907121736  | 1.926926883  |
| H341 | 4.889804179  | 4.745825549   | 0.879169052  |
| H342 | 6.094233079  | 5.422027245   | -1.253634968 |
| H343 | 1.756851694  | -5.647303109  | -1.493666676 |
| H344 | 1.269664696  | -10.925959107 | 2.395150274  |
| H345 | 1.973095492  | -11.623498219 | 0.373859357  |
| H346 | -4.805057916 | -4.589327692  | 1.193340212  |
| H347 | 8.552262448  | -7.544227681  | 2.539381864  |
| H348 | 4.551193761  | -8.001161008  | 2.683582257  |
| H349 | 7.910061587  | -0.638646013  | 1.263027940  |
| H350 | 4.465935227  | 2.442263626   | 7.859813737  |
| H351 | -4.731910769 | -5.576941315  | 4.448041100  |
| H352 | -3.323161646 | -4.939692918  | 5.325907874  |
| H353 | 7.242096570  | -8.900711297  | 5.766089465  |
| H354 | 7.355997045  | -9.736571912  | 4.364281121  |
| H355 | 3.676896493  | -12.439714831 | 3.961167097  |
| H356 | 4.928194009  | -10.673026611 | 3.232650378  |
| H357 | 4.999784885  | -11.980742688 | 6.315850099  |
| H358 | 2.554666379  | -11.218933638 | 4.598774463  |
| H359 | -3.505936870 | -7.004442438  | 7.146566146  |
| H360 | -8.176935615 | 10.775086515  | 3.795599600  |
| H361 | -3.712365547 | -12.716392103 | 2.339203716  |
| H362 | -3.531286670 | -10.329864545 | 3.656109336  |
| H363 | -5.589450398 | 11.820567632  | 2.610329485  |
| H364 | -6.742123636 | 9.146541101   | 1.605932108  |

|       |              |               |               |
|-------|--------------|---------------|---------------|
| H365  | -6.651127158 | 10.650908311  | 0.669972018   |
| H366  | 1.893874109  | -3.046163187  | -0.654200759  |
| H367  | -0.349348243 | 9.625014115   | -0.401277417  |
| H368  | 0.501900021  | -0.556009390  | -0.117854902  |
| H369  | 1.041598929  | 1.265627582   | -1.057330575  |
| Mo370 | 3.602137607  | -5.041808558  | 1.421397016   |
| N371  | -1.148391163 | -2.707370568  | 0.721965677   |
| N372  | -0.026126926 | -2.772515997  | 0.766916984   |
| N373  | 4.036006774  | -0.822136830  | -8.939553166  |
| N374  | 1.545519017  | 1.815416172   | -9.818350511  |
| N375  | -0.908268213 | 0.742843880   | -10.740707776 |
| N376  | -1.064842268 | -1.748165483  | -9.439262152  |
| N377  | -1.194407452 | -0.929292123  | -6.700205663  |
| N378  | -3.695596358 | 0.411801362   | -6.769189998  |
| N379  | -5.553833351 | -1.588151724  | -7.752942855  |
| N380  | -5.079517489 | -4.113793687  | -6.457615200  |
| N381  | -4.781436872 | -3.657836236  | -3.758573747  |
| N382  | -6.278233576 | -1.308402959  | -2.573296849  |
| N383  | -8.737266076 | -1.566853434  | -4.001601288  |
| N384  | -1.396475976 | -13.143057551 | -3.523454961  |
| N385  | -0.998532719 | -11.619566213 | -1.349851260  |
| N386  | -1.955841281 | -6.122160501  | 1.460471189   |
| N387  | -4.039882733 | -5.195478292  | 0.911637156   |
| N388  | -2.757326576 | -4.319252706  | 2.648881754   |
| N389  | -1.956486825 | -11.671839835 | 2.012404668   |
| N390  | 4.392775651  | 2.154313275   | -5.219031473  |
| N391  | 5.123144288  | -2.130838000  | -3.275328483  |
| N392  | 2.851319403  | 4.070111319   | -4.281508475  |
| N393  | 1.596774132  | 5.828912967   | -6.008223927  |
| N394  | -0.917415104 | 4.710140846   | -6.349928013  |
| N395  | -2.281099056 | 4.542235442   | -3.891160492  |
| N396  | 0.344682491  | 4.283827171   | -0.566368027  |
| N397  | 0.636837803  | 2.210103562   | -1.084222126  |
| N398  | -3.721306849 | 6.794325218   | -3.189171533  |
| N399  | -3.070692021 | 11.466799324  | -3.677561001  |
| N400  | -4.935531046 | 12.477987090  | -3.025903910  |
| N401  | -4.539202612 | -4.695448388  | 7.730733078   |
| N402  | -3.636508302 | 1.664590741   | 9.119790001   |
| N403  | -1.194006454 | 4.252948161   | 9.006122880   |
| N404  | -0.092893884 | 5.312456522   | 6.664865264   |
| N405  | 2.045339013  | 7.451107277   | 2.719582142   |
| N406  | 2.460109156  | 9.061377509   | 4.368369311   |
| N407  | 0.830409727  | 9.430940683   | 2.768715705   |
| N408  | -1.784850909 | 4.539039151   | 4.503339821   |
| N409  | -4.221250987 | 5.644331078   | 5.363977260   |
| N410  | -4.671706909 | 8.410011592   | 5.768785881   |
| N411  | -1.580779316 | 9.119935845   | 5.135762346   |
| N412  | -5.672752406 | 10.147837357  | 3.874052091   |
| N413  | 10.733090553 | -3.418906863  | 4.130959415   |
| N414  | 7.859266781  | -1.490022906  | 3.155613080   |
| N415  | 6.412614990  | 1.127903172   | 3.637750259   |
| N416  | 5.403200954  | 1.393070003   | 6.308539412   |
| N417  | 10.541756829 | 1.282512386   | 0.432969281   |
| N418  | 8.571990050  | 3.244845728   | -0.322972799  |
| N419  | 7.159470879  | -8.807037968  | 4.749551455   |
| N420  | 5.795568672  | -5.877942924  | 1.758180056   |
| N421  | 7.983586108  | -5.709841981  | 1.536890122   |
| N422  | 4.540902330  | -10.566359515 | 4.169986160   |
| N423  | -0.827865982 | 1.884155368   | 1.629027217   |
| N424  | -0.190396827 | 1.040099339   | 2.042332398   |
| O425  | 1.331466936  | 0.015673405   | -8.443738024  |
| O426  | -1.916071495 | 1.574866152   | -8.872979374  |

|      |               |               |              |
|------|---------------|---------------|--------------|
| O427 | -3.324491308  | -1.739486283  | -9.780775334 |
| O428 | -2.450756497  | -2.791950416  | -6.340077644 |
| O429 | -3.914512567  | -0.034840759  | -4.548234422 |
| O430 | -7.052336870  | -0.642109936  | -6.308184673 |
| O431 | -7.245348719  | -4.702450742  | -6.937623148 |
| O432 | -4.551716843  | -5.900989638  | -3.301055084 |
| O433 | -6.696859544  | -2.991648398  | -1.090853544 |
| O434 | -9.754753304  | -1.311171621  | -1.986822609 |
| O435 | -11.578174975 | -3.750490212  | -3.851472017 |
| O436 | 1.088116075   | -12.520380476 | -0.920523044 |
| O437 | -3.372946282  | -11.801302307 | 0.206066310  |
| O438 | -3.806674418  | -11.763139923 | 5.079513894  |
| O439 | 0.886512358   | 2.970364122   | -4.719083645 |
| O440 | 5.697261078   | -0.043710625  | -3.975055603 |
| O441 | 0.860234273   | 7.131516314   | -4.279512579 |
| O442 | 2.490896104   | 7.098425208   | -2.124193066 |
| O443 | -1.564769882  | 6.459390203   | -7.695070179 |
| O444 | -4.149927639  | 3.745455205   | -4.928064890 |
| O445 | -4.953238085  | 5.571839623   | -1.697165950 |
| O446 | -6.882014785  | 8.370296066   | -2.972664659 |
| O447 | -5.153324342  | -7.867766934  | 6.304976715  |
| O448 | -6.025897232  | 0.451906501   | 4.090002246  |
| O449 | -3.151857325  | 4.274564955   | 7.845790549  |
| O450 | -0.653148761  | 7.443561381   | 7.319305711  |
| O451 | -1.021931477  | 6.394646508   | 3.400624489  |
| O452 | -4.970692967  | 5.664547411   | 3.198163477  |
| O453 | -4.199045152  | 2.622650555   | 4.684662045  |
| O454 | -6.698403453  | 7.985803112   | 6.745737942  |
| O455 | -5.643002959  | 11.910342900  | 5.320193941  |
| O456 | -2.379596439  | 11.081506383  | 4.278374307  |
| O457 | -8.151658168  | 12.297000511  | 2.430747295  |
| O458 | -0.702474712  | 8.919826872   | 0.175018011  |
| O459 | 9.541260264   | -2.364530263  | 1.855390985  |
| O460 | 8.089877283   | 1.716789730   | 2.195514611  |
| O461 | 5.890185970   | 3.625441402   | 6.262237834  |
| O462 | 5.625043542   | 1.021807047   | 9.909422436  |
| O463 | 9.702305652   | 3.321105516   | -2.304656108 |
| O464 | 8.100190721   | -2.495644476  | -2.622153889 |
| O465 | 8.327858522   | -2.894689340  | -0.439601234 |
| O466 | 7.080862295   | 6.211412349   | 0.971724345  |
| O467 | 4.236886680   | -9.344832079  | 6.052095759  |
| O468 | 3.099029881   | -12.564439613 | 6.775549694  |
| O469 | 3.128744468   | -4.476223418  | -3.396996659 |
| O470 | 3.039104457   | -6.457440698  | -4.399738208 |
| O471 | 6.590855386   | -10.453927192 | -1.114830571 |
| O472 | 7.191448274   | -8.861828514  | -2.602486494 |
| O473 | 3.142146078   | -7.272008663  | 1.258631577  |
| O474 | 2.397591223   | -8.742381373  | -0.274973503 |
| O475 | 4.138622801   | -5.614894034  | -0.534935357 |
| O476 | 0.543616523   | -10.734859312 | 3.046248542  |
| O477 | 0.918797308   | -7.937656142  | 2.994125827  |
| O478 | 0.953213123   | 6.876834908   | 0.132802573  |
| O479 | 5.162730844   | -12.100563704 | 1.143873250  |
| O480 | 2.470755233   | -11.093603568 | 1.047606820  |
| S481 | -0.472375947  | 1.936864601   | 6.477984946  |
| S482 | 2.101106324   | 1.019111135   | 3.996361033  |
| S483 | 4.130658804   | -2.820863029  | 0.867734064  |
| S484 | -1.034918656  | -0.910647460  | 3.911493449  |
| S485 | 1.695701252   | -0.599724243  | 0.532725325  |
| S486 | 4.852232835   | -1.560357392  | 4.555581295  |
| S487 | 1.311227830   | -5.058035009  | 1.100360046  |
| S488 | 1.502651160   | -1.497564016  | 6.385101975  |

|                   |                                |              |              |               |
|-------------------|--------------------------------|--------------|--------------|---------------|
|                   | S489                           | 3.635411231  | -4.998126114 | 3.814981583   |
|                   | S490                           | -0.063786564 | -4.626319365 | 4.503918106   |
| <b>8, 35(3/2)</b> | <b>bm22b2n2x6x6n2n35.car_1</b> |              |              |               |
| Fe1               | 2.90                           | C1           | -7.242985110 | -5.863407775  |
| Fe2               | -1.19                          | C2           | -6.994620790 | -7.087302541  |
| Fe3               | -2.48                          | C3           | -8.729784007 | -3.979098088  |
| Fe4               | 2.78                           | C4           | -8.877847945 | -4.168188334  |
| Fe5               | -2.05                          | C5           | -9.486195936 | -5.655364079  |
| Fe6               | 0.15                           | C6           | -8.146738681 | -5.741670340  |
| Fe7               | 2.46                           | C7           | -5.756034585 | -6.242514583  |
|                   |                                | C8           | -5.130186253 | -4.848817628  |
|                   |                                | C9           | -4.836923422 | -2.642613847  |
|                   |                                | C10          | -5.497663373 | -1.792652203  |
|                   |                                | C11          | -7.486005627 | -1.296382640  |
|                   |                                | C12          | -7.146786025 | -1.787695362  |
|                   |                                | C13          | -7.055410348 | -3.708837011  |
|                   |                                | C14          | -5.645905408 | -4.007828984  |
|                   |                                | C15          | -3.347130922 | -4.689759945  |
|                   |                                | C16          | -2.244808195 | -3.662683437  |
|                   |                                | C17          | -1.751258603 | -1.458183312  |
|                   |                                | C18          | -2.132648834 | -0.164278368  |
|                   |                                | C19          | -1.697973611 | -1.301533214  |
|                   |                                | C20          | -0.998450329 | 0.004843704   |
|                   |                                | C21          | -1.053452264 | -2.539207562  |
|                   |                                | C22          | -3.726196317 | 1.695995724   |
|                   |                                | C23          | -4.231120882 | 1.527849995   |
|                   |                                | C24          | -4.751932336 | 2.400364605   |
|                   |                                | C25          | -5.282203423 | 3.688053286   |
|                   |                                | C26          | -4.128304923 | 2.709026089   |
|                   |                                | C27          | -5.616650971 | 0.291363529   |
|                   |                                | C28          | -4.528460789 | 0.154997585   |
|                   |                                | C29          | 4.214529400  | -10.629189604 |
|                   |                                | C30          | 4.933620503  | -9.388197345  |
|                   |                                | C31          | 4.964482179  | -6.897182761  |
|                   |                                | C32          | 5.658741533  | -6.350658600  |
|                   |                                | C33          | 3.825702768  | -5.977065138  |
|                   |                                | C34          | 4.288676542  | -4.553048560  |
|                   |                                | C35          | 3.206507556  | -3.763899318  |
|                   |                                | C36          | 3.111474950  | -1.257915423  |
|                   |                                | C37          | 7.716414285  | -5.368343110  |
|                   |                                | C38          | 7.914688030  | -3.869621726  |
|                   |                                | C39          | -4.056750218 | -3.079640241  |
|                   |                                | C40          | -4.647042283 | -1.661225880  |
|                   |                                | C41          | -2.660398816 | -3.028760197  |
|                   |                                | C42          | -2.010972035 | -4.389777262  |
|                   |                                | C43          | -1.162783669 | -4.990549501  |
|                   |                                | C44          | -4.961997102 | 0.398662874   |
|                   |                                | C45          | -6.450906168 | 0.749052147   |
|                   |                                | C46          | -4.352351119 | 1.036874245   |
|                   |                                | C47          | -8.692192577 | -0.056274477  |
|                   |                                | C48          | -8.868557996 | 0.169093858   |
|                   |                                | C49          | -7.843847393 | 0.061896106   |
|                   |                                | C50          | -6.995258803 | 1.187494892   |
|                   |                                | C51          | -5.261038190 | 2.893422117   |
|                   |                                | C52          | -6.052335716 | 4.189440951   |
|                   |                                | C53          | -4.191618365 | 3.298689132   |
|                   |                                | C54          | -3.218657551 | 2.249964581   |
|                   |                                | C55          | -2.762927602 | 1.076124671   |
|                   |                                | C56          | -1.649547596 | 1.409665940   |
|                   |                                | C57          | -7.842943590 | 5.667282914   |
|                   |                                | C58          | -8.502340239 | 5.906465721   |

|      |               |              |              |
|------|---------------|--------------|--------------|
| C59  | -8.905897510  | 5.567434738  | -1.592500672 |
| C60  | -9.432491518  | 6.868445006  | -2.123211049 |
| C61  | -9.765891528  | 8.041565416  | -1.473736764 |
| C62  | -10.125807271 | 8.233505824  | -3.652233462 |
| C63  | 6.581166164   | 2.372650016  | 7.014223705  |
| C64  | 7.546205002   | 1.255691785  | 7.366823677  |
| C65  | 5.409813251   | 1.718335242  | 6.245525889  |
| C66  | 4.318690225   | 2.696432291  | 5.879016594  |
| C67  | 3.259914501   | 2.976113387  | 6.762873953  |
| C68  | 4.324374489   | 3.348206229  | 4.631809282  |
| C69  | 2.236704390   | 3.866019475  | 6.415423554  |
| C70  | 3.316185809   | 4.245165753  | 4.274131222  |
| C71  | 2.271552615   | 4.500866917  | 5.166543237  |
| C72  | 5.219196551   | 7.490103789  | 0.648989242  |
| C73  | 4.343144064   | 8.407211657  | -0.210758698 |
| C74  | 4.553133385   | 6.114382281  | 0.813848864  |
| C75  | 4.070286437   | 9.514894795  | -2.384815294 |
| C76  | 2.823088668   | 8.882061380  | -3.002061194 |
| C77  | 1.538681314   | 6.808496125  | -3.383081592 |
| C78  | 0.436638845   | 6.688162520  | -2.308411240 |
| C79  | 1.991038932   | 5.444976262  | -3.936817344 |
| C80  | 0.917479908   | 4.535787228  | -4.543509411 |
| C81  | 0.323294396   | 4.960755572  | -5.898608752 |
| C82  | -1.136585306  | 6.967705420  | -6.222203067 |
| C83  | -0.159125619  | 6.433144767  | 0.042574299  |
| C84  | -0.629219693  | 7.810747371  | 0.551203177  |
| C85  | 0.310672574   | 5.617156794  | 1.253589430  |
| C86  | 0.103475808   | 10.038841337 | 1.243241901  |
| C87  | -0.482380723  | 11.286631012 | 0.587642765  |
| C88  | -1.386032337  | 12.322732257 | -1.452681168 |
| C89  | -2.894185299  | 12.629441160 | -1.327926896 |
| C90  | -0.971403265  | 12.217443827 | -2.938184537 |
| C91  | -1.633132909  | 11.029044751 | -3.625118847 |
| C92  | -5.104532960  | 11.773247372 | -0.685168249 |
| C93  | -5.540182611  | 12.880060878 | 0.268455838  |
| C94  | -5.715908427  | 10.416989550 | -0.239409521 |
| C95  | -5.452946529  | 9.316143381  | -1.241845842 |
| C96  | -6.270704488  | 9.182868890  | -2.375601902 |
| C97  | -4.362332538  | 8.440740180  | -1.104996645 |
| C98  | -6.005601568  | 8.220938725  | -3.352431000 |
| C99  | -4.066125521  | 7.487410084  | -2.086140830 |
| C100 | -4.889107935  | 7.395603156  | -3.206122330 |
| C101 | 7.721803274   | -3.925847639 | -6.189008499 |
| C102 | 6.213383521   | -3.817903027 | -6.337872164 |
| C103 | 4.235033287   | -2.386213732 | -5.877329927 |
| C104 | 3.915474393   | -1.114493529 | -6.671726186 |
| C105 | 4.102257926   | 1.324007962  | -6.708383567 |
| C106 | 5.113458091   | 2.426665622  | -6.407230338 |
| C107 | 6.954799815   | 3.280457710  | -5.040478328 |
| C108 | 8.284804121   | 3.233934120  | -5.767270595 |
| C109 | 1.565164861   | -4.104397328 | -9.158206281 |
| C110 | 0.443482702   | -3.085043686 | -9.392837675 |
| C111 | 1.480890690   | -4.649374757 | -7.713772106 |
| C112 | 2.326491310   | -5.925357417 | -7.542305350 |
| C113 | 2.449121611   | -6.285804651 | -6.078493651 |
| C114 | -0.348070231  | -0.790658616 | -9.095070634 |
| C115 | 0.264211640   | 0.516138348  | -9.562427584 |
| C116 | -1.287640511  | -0.664870503 | -7.868165874 |
| C117 | -0.507854983  | -0.582043299 | -6.584379296 |
| C118 | 0.045067905   | 0.634353425  | -6.150334008 |
| C119 | -0.200116367  | -1.754368797 | -5.871954048 |
| C120 | 0.942718848   | 0.658662979  | -5.077038397 |

|       |               |               |              |
|-------|---------------|---------------|--------------|
| C121  | 0.695381030   | -1.729890923  | -4.798136938 |
| C122  | 1.295337529   | -0.524190124  | -4.420645684 |
| C123  | 9.537091934   | -5.704488135  | -0.448972381 |
| C124  | 10.182183725  | -5.658647868  | 0.947872474  |
| C125  | 8.132289430   | -6.326648910  | -0.423290990 |
| C126  | 7.335083619   | -6.207896959  | -1.686383379 |
| C127  | 7.577818370   | -6.826915582  | -2.895814600 |
| C128  | 5.641218581   | -5.756724588  | -2.998424376 |
| C129  | 10.646192489  | -6.739921179  | 3.078634666  |
| C130  | 12.119013806  | -6.397408070  | 3.033518793  |
| C131  | 1.032185269   | -7.045789870  | 0.690895695  |
| C132  | 2.247448765   | -6.572996025  | 1.439993603  |
| C133  | 3.595997947   | -6.789649434  | 0.638832460  |
| C134  | 3.731438922   | -8.288808364  | 0.242158597  |
| C135  | 5.108125400   | -8.613038252  | -0.362186926 |
| C136  | 5.391921852   | -10.084211697 | -0.475688626 |
| C137  | 4.767162400   | -6.496274485  | 1.628053591  |
| C138  | 4.234580015   | -0.519550423  | -0.436790365 |
| Fe139 | 5.060534025   | -1.803824597  | -1.661818285 |
| Fe140 | 2.571668218   | 0.975038250   | -0.586150139 |
| Fe141 | 5.091971666   | 0.781869070   | 0.794752137  |
| Fe142 | 5.037999541   | 0.705305632   | -1.780833654 |
| Fe143 | 4.335758623   | 2.995735999   | -0.450565987 |
| Fe144 | 5.190818609   | -1.727291236  | 0.888500853  |
| Fe145 | 2.671748254   | -2.234617832  | 0.015958621  |
| H146  | -5.281293416  | -7.702918609  | -1.826603960 |
| H147  | -5.014105780  | -6.887227012  | -3.216512016 |
| H148  | -8.982347189  | -5.448890689  | -2.876301582 |
| H149  | -7.337117123  | -6.872878094  | -3.768860335 |
| H150  | -7.654965516  | -7.886757571  | -2.365770137 |
| H151  | -7.947484893  | -3.219667766  | -1.479431573 |
| H152  | -9.602317554  | -6.071067185  | -0.100018924 |
| H153  | -9.673294333  | -3.576997177  | -1.735121415 |
| H154  | -10.012009937 | -6.613242921  | 2.119003473  |
| H155  | -7.211181698  | -6.363280324  | 1.026268927  |
| H156  | -10.079176073 | -4.877748360  | 2.508096781  |
| H157  | -3.757079202  | -2.626114755  | 1.899781870  |
| H158  | -5.794635093  | -4.351285119  | 0.802683178  |
| H159  | -5.125679796  | -6.873980098  | 1.939618218  |
| H160  | -7.212347164  | -0.235225269  | 4.047873239  |
| H161  | -7.343318017  | -2.658927558  | 2.435100441  |
| H162  | -5.767312442  | -6.676096364  | 3.587966487  |
| H163  | -5.009218652  | -2.178339462  | 0.716523831  |
| H164  | -7.432936951  | -3.754615248  | 4.930855585  |
| H165  | -8.570096198  | -1.385026751  | 3.941724208  |
| H166  | -1.608746470  | -3.450862631  | 3.760420936  |
| H167  | -1.045736302  | -2.453961025  | 2.397684674  |
| H168  | -0.010047533  | -2.660372973  | 3.822530671  |
| H169  | -2.736459310  | -1.244632555  | 3.767720381  |
| H170  | -7.618987775  | -4.652455025  | 7.042825395  |
| H171  | -3.811214898  | 1.801821319   | 3.797002570  |
| H172  | -5.449190692  | -0.070309390  | 7.520727066  |
| H173  | -5.798703132  | 3.501708944   | 7.291334746  |
| H174  | -0.888495306  | 0.066158031   | 2.644433093  |
| H175  | 0.009893637   | 0.072269659   | 4.165606129  |
| H176  | 6.180550706   | 2.777987417   | 7.963931666  |
| H177  | -4.859455888  | 3.230120302   | 3.693876498  |
| H178  | -5.991872536  | 4.177364083   | 5.656248451  |
| H179  | -3.251427068  | 3.366354262   | 4.447994451  |
| H180  | -4.457722473  | 4.391860716   | 6.535545021  |
| H181  | -5.601025465  | 1.708413166   | 5.551876402  |
| H182  | -2.832595386  | 2.333224142   | 6.708326123  |



|      |               |              |               |
|------|---------------|--------------|---------------|
| H183 | -3.849967820  | 0.032438289  | 5.265845071   |
| H184 | -1.573308787  | 0.882049167  | 4.065870168   |
| H185 | 0.768800177   | 4.680600605  | 0.896215405   |
| H186 | -0.586121564  | 5.365355247  | 1.841737284   |
| H187 | 1.218016179   | 6.020946199  | 2.944917735   |
| H188 | 0.598222638   | 5.449589658  | 5.442213277   |
| H189 | 3.322202590   | 4.720770852  | 3.292801569   |
| H190 | 5.112311251   | 3.124630018  | 3.908751284   |
| H191 | 3.224486507   | 2.482160222  | 7.738203494   |
| H192 | -3.624042072  | -2.490769582 | 5.796056933   |
| H193 | -3.063937687  | -5.616878334 | 6.482056181   |
| H194 | -3.337328060  | -4.890720976 | 8.081546567   |
| H195 | -4.950665649  | -4.394182951 | 5.635752166   |
| H196 | -7.516478310  | -3.030334349 | 7.760198311   |
| H197 | 1.411503870   | 4.057145849  | 7.107302223   |
| H198 | -0.756547819  | -1.727741608 | 6.043981147   |
| H199 | -6.302957268  | 1.097572687  | 9.925347963   |
| H200 | -6.184262744  | -0.652743575 | 9.616679632   |
| H201 | -3.544620928  | -0.202762914 | 10.281906926  |
| H202 | 8.696253370   | -5.868645446 | 9.001542846   |
| H203 | 0.538473646   | -6.082249235 | -3.826034714  |
| H204 | 1.150786555   | -8.688202957 | 1.695897214   |
| H205 | 1.832730218   | -6.759385986 | -8.061831062  |
| H206 | 3.322976620   | -5.782228279 | -7.984886458  |
| H207 | 0.435499783   | -4.875153815 | -7.451644762  |
| H208 | 1.184059557   | 0.393235162  | -10.181968761 |
| H209 | 1.310976363   | -4.930529347 | -9.840123640  |
| H210 | -1.987552794  | -2.437039243 | -3.346511270  |
| H211 | -2.789911941  | -5.129109922 | -2.124477904  |
| H212 | 1.558737083   | -1.578130130 | -8.498300757  |
| H213 | -0.973951164  | -1.113096788 | -9.951732231  |
| H214 | 3.233153782   | -2.895335581 | -8.911015135  |
| H215 | 0.227324568   | -5.719668725 | -2.130763280  |
| H216 | 1.814933887   | -3.863316135 | -7.019636943  |
| H217 | 3.546603704   | -4.338695112 | -9.644064802  |
| H218 | -4.800098918  | -4.136738143 | -4.979728661  |
| H219 | -2.779476348  | -2.480464138 | -1.758437614  |
| H220 | 4.243635781   | -5.474300937 | -6.085295081  |
| H221 | -1.392092969  | -4.281758245 | -1.476162290  |
| H222 | -4.797969951  | 2.582060538  | 1.014676163   |
| H223 | -3.030045563  | 0.563838017  | 0.070585505   |
| H224 | -8.886266761  | 0.268535354  | 0.093502881   |
| H225 | -6.936814460  | -0.510939317 | -2.030224516  |
| H226 | -7.405218633  | 3.654953101  | -1.067429504  |
| H227 | -9.720484868  | 8.341643048  | -0.432988131  |
| H228 | -8.847771901  | 4.969981712  | 1.383385017   |
| H229 | -9.730317289  | 4.917583918  | -1.248853436  |
| H230 | -7.147961533  | 6.496939534  | -0.679676223  |
| H231 | -10.418167200 | 8.686004434  | -4.597011052  |
| H232 | -3.629327385  | 4.135915965  | -0.515437840  |
| H233 | -4.694464800  | 3.700655590  | -1.854261712  |
| H234 | -10.518889735 | 9.853766137  | -2.328571095  |
| H235 | -8.438257872  | 5.050957907  | -2.445512567  |
| H236 | -5.974644475  | 1.448651658  | -1.366986080  |
| H237 | -7.559937952  | -0.875026856 | 0.319451389   |
| H238 | -9.102795204  | 0.827163283  | -4.429273988  |
| H239 | -0.945898827  | 1.271064348  | -3.562574508  |
| H240 | -9.300114026  | -0.922721561 | -4.218090636  |
| H241 | 7.882081095   | 3.935443982  | 6.762668346   |
| H242 | 6.585339268   | 3.997991628  | 5.769225698   |
| H243 | 1.814180973   | 6.223058498  | -0.828450271  |
| H244 | -1.053603212  | 5.942465272  | -0.366299559  |

|      |              |              |              |
|------|--------------|--------------|--------------|
| H245 | 1.212800794  | 8.618204996  | 0.146659087  |
| H246 | -2.653965280 | 3.215562813  | -3.260108969 |
| H247 | -3.562066766 | 3.687261614  | -5.090897247 |
| H248 | -3.698904498 | 5.027518278  | -4.240372099 |
| H249 | -3.270684230 | 0.843004562  | -5.885986705 |
| H250 | -4.805528169 | 0.593713727  | -6.770101956 |
| H251 | 0.125423487  | 12.155586689 | -2.988674015 |
| H252 | -1.297675663 | 13.137354596 | -3.440259803 |
| H253 | 0.132007662  | 9.873838000  | -3.534071825 |
| H254 | -1.321685402 | 9.057484026  | -4.053843114 |
| H255 | -0.431150411 | 8.564458042  | -7.294840775 |
| H256 | 0.090031206  | 4.070221267  | -6.501147681 |
| H257 | -6.659489880 | 8.121023620  | -4.222821743 |
| H258 | -3.718275709 | 8.484574384  | -0.221505599 |
| H259 | -2.936295239 | 7.185266437  | -5.232243177 |
| H260 | 2.481043087  | 4.878398726  | -3.129011189 |
| H261 | 3.401401285  | 7.010258566  | -2.352534846 |
| H262 | 0.103410444  | 4.357707610  | -3.823089645 |
| H263 | -6.957203788 | -1.218260030 | -4.431676515 |
| H264 | 4.736339148  | 9.816184696  | -3.205040686 |
| H265 | -4.311722905 | -1.597993517 | -5.281196521 |
| H266 | 2.766262206  | 5.641169427  | -4.695749443 |
| H267 | -3.175624137 | 6.861875473  | -1.997653147 |
| H268 | -5.453474423 | 2.603253556  | -5.495632496 |
| H269 | 3.733111507  | 10.428801632 | -1.875800244 |
| H270 | 0.454587497  | 7.095618971  | -7.525256985 |
| H271 | -2.589058752 | 8.394314376  | -6.415860957 |
| H272 | -3.130316437 | -4.101159321 | -4.896521598 |
| H273 | -4.709436588 | -3.700651022 | -2.727866107 |
| H274 | -7.133902201 | 9.840516876  | -2.503785781 |
| H275 | -4.510564259 | 0.895812214  | -3.728146951 |
| H276 | 1.088252675  | 7.415112780  | -4.180374942 |
| H277 | 1.065219138  | 5.535997686  | -6.466738091 |
| H278 | 1.406031814  | 3.564147687  | -4.694541727 |
| H279 | -1.695730034 | 5.261949884  | -5.279736078 |
| H280 | -0.539825684 | 9.807934247  | 2.105803571  |
| H281 | -0.758518526 | 10.279163881 | -1.178469829 |
| H282 | -0.884578596 | 13.200434687 | -1.019483019 |
| H283 | 1.091038959  | 10.324429497 | 1.629775918  |
| H284 | -3.196536456 | 10.816974682 | -0.438697395 |
| H285 | 8.172091456  | -2.923214935 | -6.171217400 |
| H286 | 7.894495813  | -4.375259912 | -5.189028252 |
| H287 | 9.454003888  | -4.653595534 | -0.762119163 |
| H288 | 9.250017844  | -4.948583597 | -7.071420742 |
| H289 | 7.769897890  | -5.577282006 | -7.380924219 |
| H290 | 5.236210659  | 5.478065942  | 1.390568127  |
| H291 | 4.567268967  | 8.329454837  | 2.389661350  |
| H292 | 5.666920502  | 8.228871063  | -1.773399533 |
| H293 | 3.612724287  | 6.238366657  | 1.369469567  |
| H294 | 5.995210441  | 8.937300072  | 1.879270520  |
| H295 | 7.137918468  | 3.216070883  | -3.957016024 |
| H296 | 6.193204040  | 7.351846871  | 0.153989750  |
| H297 | 3.037537175  | -5.962133814 | 7.111635962  |
| H298 | 5.695640215  | -7.006642892 | 5.997458310  |
| H299 | 6.021250710  | 1.381947435  | -4.847206301 |
| H300 | 3.145765831  | 0.757544221  | 4.871778270  |
| H301 | 4.099952996  | 1.171334991  | -7.796074423 |
| H302 | 0.941823947  | -2.650396237 | -4.263836943 |
| H303 | 3.112614702  | 1.738824173  | -6.452594013 |
| H304 | 2.293429755  | -3.678515254 | 5.893746268  |
| H305 | 4.646608143  | -0.044201613 | -5.096407653 |
| H306 | 2.924914820  | -4.291101784 | 4.364904300  |

|      |              |               |              |
|------|--------------|---------------|--------------|
| H307 | 3.393195522  | -6.436161753  | 5.436434968  |
| H308 | 5.182958287  | -4.578565154  | 5.385301265  |
| H309 | 4.563487562  | -4.020829704  | 6.952239144  |
| H310 | -1.945745931 | -1.545713161  | -7.863123209 |
| H311 | 3.707150112  | -8.331354764  | 7.809368399  |
| H312 | 3.618426971  | -11.018126537 | 6.326987490  |
| H313 | 2.029182301  | -0.490327891  | -3.617533922 |
| H314 | 3.828458136  | -10.456536420 | 9.183592349  |
| H315 | 2.556722144  | -11.023310467 | 8.321398489  |
| H316 | 4.370408187  | -2.399943563  | 4.158393138  |
| H317 | 1.399793152  | 1.592476894   | -4.744208321 |
| H318 | -0.653813532 | -2.702620615  | -6.171347601 |
| H319 | 8.046435755  | -9.251149801  | 2.737396302  |
| H320 | 8.228091665  | -7.400486290  | -0.183002762 |
| H321 | 6.372261376  | -7.619613132  | 3.363081487  |
| H322 | 7.874316115  | -10.105412842 | 1.460205595  |
| H323 | 8.358225877  | 2.474264359   | -6.583538178 |
| H324 | 6.356379272  | -4.601693907  | 2.672879220  |
| H325 | 2.325666963  | -7.068841852  | 2.419362727  |
| H326 | 6.245472572  | -2.017077656  | -5.357727830 |
| H327 | 3.578432496  | -8.899813277  | 1.145521401  |
| H328 | 6.356748404  | -6.860938423  | -4.655363673 |
| H329 | 4.690100295  | -5.413629488  | -3.387433740 |
| H330 | 4.998122422  | -11.377676408 | 7.373071429  |
| H331 | 4.183510023  | -0.199826202  | 3.813239584  |
| H332 | 7.646505312  | -5.035110669  | 4.652790563  |
| H333 | 6.833850439  | -3.164866093  | 3.021689809  |
| H334 | 7.310409649  | -5.848685748  | 6.907059774  |
| H335 | 2.089676847  | -1.914926332  | 6.886420428  |
| H336 | 4.753011293  | -11.682225691 | -1.265437849 |
| H337 | 5.175012243  | -8.162117757  | -1.363601923 |
| H338 | 5.913025641  | -8.190678417  | 0.249527190  |
| H339 | 2.942130992  | -8.535535255  | -0.482129541 |
| H340 | 3.904043573  | -2.283380279  | -4.831831069 |
| H341 | -0.199848547 | 1.553152917   | -6.687958568 |
| H342 | -1.910751463 | 0.227483983   | -8.029703719 |
| H343 | 2.155677992  | -5.488666340  | 1.585650415  |
| H344 | 7.805324197  | -6.574717228  | 4.740187659  |
| H345 | 6.735000649  | -8.546312568  | 4.563079519  |
| H346 | 1.829448182  | -0.275733962  | 6.483807752  |
| H347 | 8.405297681  | -7.444380589  | -3.226865251 |
| H348 | 7.554979799  | -5.874447733  | 0.390559199  |
| H349 | 3.712561581  | -3.219673328  | -6.350391638 |
| H350 | 6.493883015  | 4.260952416   | -5.241417896 |
| H351 | 5.001516311  | 0.918779858   | 6.881557880  |
| H352 | 5.811828075  | 1.248492198   | 5.334167837  |
| H353 | 11.314510825 | -5.896459583  | -1.456265768 |
| H354 | 10.629132671 | -7.332656654  | -1.076580857 |
| H355 | 10.560125311 | -7.758438999  | 3.488585481  |
| H356 | 9.459151393  | -7.544824870  | 1.502362111  |
| H357 | 12.633635411 | -6.668614675  | 2.080451295  |
| H358 | 10.126893091 | -6.058591386  | 3.771373009  |
| H359 | 8.273119019  | 1.007993405   | 6.555786239  |
| H360 | -4.780962732 | 13.179439030  | 1.029856076  |
| H361 | 7.179524833  | -5.601401598  | 9.905300492  |
| H362 | 7.100993054  | -3.293063659  | 8.432255981  |
| H363 | -5.496965522 | 12.030028276  | -1.682291197 |
| H364 | -5.310713494 | 10.145624816  | 0.747635772  |
| H365 | -6.796922761 | 10.575972787  | -0.119632176 |
| H366 | 1.595904330  | -3.294740258  | 0.112586066  |
| H367 | -5.265970166 | 6.438870093   | -4.862968013 |
| H368 | 0.305154987  | -0.681838594  | -0.122746862 |

|       |               |               |              |
|-------|---------------|---------------|--------------|
| H369  | -1.186088882  | -0.226614112  | -1.545739570 |
| Mo370 | 4.763902049   | -4.183679545  | -0.334218663 |
| N371  | 1.591929512   | -0.932517625  | 2.415479312  |
| N372  | 2.001027341   | -1.398757009  | 1.475596359  |
| N373  | -5.628040320  | -7.579953029  | -2.781446967 |
| N374  | -8.408846125  | -5.194075158  | -2.075820322 |
| N375  | -9.354830430  | -5.365049410  | 0.589056304  |
| N376  | -7.102724568  | -6.228051035  | 2.030426983  |
| N377  | -5.325552572  | -4.013011282  | 1.644299020  |
| N378  | -6.809493975  | -2.031170358  | 3.039936355  |
| N379  | -7.162857614  | -3.133917425  | 5.698820715  |
| N380  | -4.695638514  | -4.301535159  | 6.624273326  |
| N381  | -2.644978073  | -2.540857132  | 6.069637176  |
| N382  | -3.314424611  | 0.413802711   | 6.047175011  |
| N383  | -5.077042632  | 0.491221861   | 8.288972892  |
| N384  | 3.324492511   | -10.350830480 | 8.300508282  |
| N385  | 4.444772410   | -8.224208435  | 7.104632389  |
| N386  | 3.674738435   | -2.430147808  | 4.908833024  |
| N387  | 2.135970637   | -1.192975242  | 6.174323840  |
| N388  | 3.488916169   | -0.155152699  | 4.589424685  |
| N389  | 6.910144116   | -5.867322642  | 7.869815522  |
| N390  | -3.995542025  | -3.546982124  | -4.758111144 |
| N391  | -0.050988528  | -5.643328773  | -3.111175302 |
| N392  | -4.662788722  | -1.015134029  | -4.503646137 |
| N393  | -7.321358771  | -0.271788889  | -4.351732267 |
| N394  | -7.788113133  | -0.103355128  | -1.625960469 |
| N395  | -6.118748361  | 1.822715025   | -0.432091817 |
| N396  | -2.508856879  | 2.422580301   | -2.577622987 |
| N397  | -1.805668116  | 0.578061338   | -1.708500116 |
| N398  | -7.116612811  | 4.402573299   | -0.441275176 |
| N399  | -9.661624848  | 7.001402662   | -3.483047927 |
| N400  | -10.201330209 | 8.897342903   | -2.464016696 |
| N401  | 7.271451807   | 3.358278410   | 6.179301696  |
| N402  | 5.469445085   | 8.063998050   | 1.980707601  |
| N403  | 4.810756199   | 8.679623220   | -1.461225612 |
| N404  | 2.710696685   | 7.539319241   | -2.908486615 |
| N405  | -0.919282071  | 5.733171135   | -5.775379895 |
| N406  | -0.249171382  | 7.608647816   | -7.006312567 |
| N407  | -2.241119162  | 7.642980974   | -5.825763180 |
| N408  | 0.838480917   | 6.505389978   | -1.021545540 |
| N409  | 0.251837389   | 8.845666005   | 0.421780598  |
| N410  | -0.944512635  | 11.157608466  | -0.691818594 |
| N411  | -0.888312787  | 9.890441019   | -3.657214610 |
| N412  | -3.655235245  | 11.671546816  | -0.744681161 |
| N413  | 8.286441110   | -4.696597222  | -7.302018890 |
| N414  | 5.664655828   | -2.670898727  | -5.896832166 |
| N415  | 4.297774445   | 0.032376988   | -6.075734042 |
| N416  | 6.041094362   | 2.223021838   | -5.436817112 |
| N417  | 2.866714778   | -3.577624098  | -9.586241491 |
| N418  | 0.678236072   | -1.810346242  | -8.970900510 |
| N419  | 10.417175775  | -6.389015615  | -1.416592195 |
| N420  | 6.116602123   | -5.534151077  | -1.775035802 |
| N421  | 6.502800093   | -6.529742360  | -3.705395711 |
| N422  | 10.044789892  | -6.748522373  | 1.753797255  |
| N423  | 0.135393386   | 2.601542879   | -0.383439613 |
| N424  | 1.084139706   | 1.985855734   | -0.472653030 |
| O425  | -6.459504281  | -5.529061149  | -0.947513791 |
| O426  | -8.578370174  | -3.251155984  | 0.949394024  |
| O427  | -8.055154877  | -5.409366595  | 3.939429427  |
| O428  | -4.493930196  | -4.504453868  | 3.704336999  |
| O429  | -4.851668187  | -0.929388124  | 3.407609935  |
| O430  | -6.913934901  | -0.982055018  | 6.428555054  |

|                    |              |                                     |              |
|--------------------|--------------|-------------------------------------|--------------|
| O431               | -5.437764121 | -4.009438961                        | 8.776908538  |
| O432               | -1.079327229 | -3.897874129                        | 7.069420737  |
| O433               | -1.397486670 | 0.317875063                         | 7.281090640  |
| O434               | -3.885403834 | 2.298827630                         | 8.973227742  |
| O435               | -4.717959378 | 0.358927428                         | 11.856227541 |
| O436               | 5.871922955  | -9.517763173                        | 5.821516994  |
| O437               | 5.085696639  | -6.376437285                        | 9.173445195  |
| O438               | 8.876383884  | -3.306328340                        | 9.433002006  |
| O439               | -5.062094961 | -1.143614692                        | -2.249423989 |
| O440               | -1.491847382 | -4.890265849                        | -4.701957423 |
| O441               | -6.793511584 | 1.950062243                         | -4.456158989 |
| O442               | -4.543291665 | 2.461220220                         | -5.866428994 |
| O443               | -9.957952338 | 0.565701587                         | -1.987783025 |
| O444               | -7.118257794 | 1.503388292                         | 1.594464789  |
| O445               | -5.660911473 | 5.000529562                         | 1.216647957  |
| O446               | -8.683212942 | 7.004337726                         | 1.378117772  |
| O447               | 7.531263381  | 0.640092462                         | 8.423520844  |
| O448               | 1.287399953  | 5.378419417                         | 4.756625360  |
| O449               | 3.275280295  | 8.892618593                         | 0.206053750  |
| O450               | 1.996702462  | 9.616990710                         | -3.582292445 |
| O451               | -0.758561639 | 6.784659414                         | -2.639169062 |
| O452               | -1.737530542 | 7.924992855                         | 1.091971611  |
| O453               | 1.232453023  | 6.382940017                         | 2.034938048  |
| O454               | -0.537795316 | 12.347412898                        | 1.222309226  |
| O455               | -3.358436954 | 13.702571563                        | -1.735639943 |
| O456               | -2.801809038 | 11.078582873                        | -4.039438747 |
| O457               | -6.648809690 | 13.389307712                        | 0.230703694  |
| O458               | -4.543940684 | 6.468291140                         | -4.205924985 |
| O459               | 5.552467073  | -4.774866903                        | -6.818223530 |
| O460               | 3.364193439  | -1.159804806                        | -7.794007365 |
| O461               | 5.025811097  | 3.488204083                         | -7.048202661 |
| O462               | 9.218876298  | 3.969065143                         | -5.490536852 |
| O463               | -0.634275491 | -3.419878614                        | -9.913613741 |
| O464               | 1.555135319  | -6.835203812                        | -5.441865094 |
| O465               | 3.593045702  | -5.929562432                        | -5.461911721 |
| O466               | -0.208952753 | 1.621762763                         | -9.343280859 |
| O467               | 10.879180298 | -4.691599617                        | 1.307341609  |
| O468               | 12.735581143 | -5.936529559                        | 3.983680074  |
| O469               | 0.421743601  | -6.417599507                        | -0.161107894 |
| O470               | 0.584902694  | -8.308240529                        | 0.996720229  |
| O471               | 6.331888757  | -10.674516687                       | 0.050642647  |
| O472               | 4.485538743  | -10.738312058                       | -1.250145393 |
| O473               | 5.609637590  | -5.589629712                        | 1.247646847  |
| O474               | 4.881850876  | -7.169753993                        | 2.678022842  |
| O475               | 3.626229002  | -5.954698211                        | -0.459034018 |
| O476               | 8.022598745  | -5.741011213                        | 5.235542620  |
| O477               | 6.679992497  | -4.043421621                        | 3.422638347  |
| O478               | -3.060250463 | 4.316881930                         | -4.500885651 |
| O479               | 8.549606719  | -9.836240957                        | 2.115898814  |
| O480               | 7.158790020  | -8.010284663                        | 3.844564153  |
| S481               | 4.159203831  | 5.283066558                         | -0.797550747 |
| S482               | 3.361336338  | 2.131661895                         | -2.369333782 |
| S483               | 3.365998291  | -3.233972384                        | -1.970368986 |
| S484               | 3.324069706  | 2.056864183                         | 1.305888116  |
| S485               | 1.207422364  | -0.859471143                        | -1.135282248 |
| S486               | 5.938464856  | -0.610639975                        | -3.339544394 |
| S487               | 3.791794791  | -3.366924395                        | 1.605728156  |
| S488               | 6.412058120  | 2.027663260                         | -0.496960098 |
| S489               | 6.683146717  | -2.746226448                        | -0.420580351 |
| S490               | 5.963109034  | -0.405860841                        | 2.471788569  |
| <b>13, 47(3/2)</b> |              | <b>bm12unh2b2n2x262n2nas3.car_1</b> |              |

Fe1 3.20  
Fe2 0.03  
Fe3 2.86  
Fe4 -2.57  
Fe5 2.39  
Fe6 -1.63  
Fe7 -1.99

|     |               |              |              |
|-----|---------------|--------------|--------------|
| C1  | -6.925595752  | -6.314535004 | 0.980166204  |
| C2  | -6.803202772  | -7.647974100 | 0.237482391  |
| C3  | -8.384961045  | -4.413719850 | 1.534711634  |
| C4  | -8.194167866  | -4.375645378 | 3.048563860  |
| C5  | -8.268906685  | -5.582592133 | 5.170509992  |
| C6  | -6.791061186  | -5.523289409 | 5.577477042  |
| C7  | -4.474026673  | -5.947678996 | 4.895822048  |
| C8  | -3.924662193  | -4.538460884 | 4.651145571  |
| C9  | -4.036986341  | -2.487430205 | 3.338596715  |
| C10 | -4.479462070  | -1.538256028 | 4.462968263  |
| C11 | -6.173184045  | -0.917409650 | 6.081127611  |
| C12 | -5.466356299  | -1.152395958 | 7.422461595  |
| C13 | -4.761102206  | -2.784306397 | 9.102673465  |
| C14 | -3.235215939  | -2.845232907 | 9.252763296  |
| C15 | -1.088360208  | -3.445100607 | 8.211689221  |
| C16 | -0.217117354  | -2.398931986 | 7.506140103  |
| C17 | -0.226001760  | -0.429983294 | 5.987872553  |
| C18 | -0.582851252  | 0.934766897  | 6.603168977  |
| C19 | -0.514140123  | -0.525442266 | 4.471050098  |
| C20 | -0.078730073  | 0.750922902  | 3.747375784  |
| C21 | 0.146105806   | -1.776491971 | 3.879991008  |
| C22 | -2.284801039  | 2.659706941  | 6.971499985  |
| C23 | -2.352093520  | 2.672524742  | 8.509623601  |
| C24 | -3.603955502  | 3.119052892  | 6.306172401  |
| C25 | -4.087841964  | 4.447768974  | 6.897873684  |
| C26 | -3.430139377  | 3.247592543  | 4.786299863  |
| C27 | -3.081395316  | 1.561407520  | 10.539224790 |
| C28 | -1.751207254  | 1.773607473  | 11.232515899 |
| C29 | 6.632304201   | -9.093482810 | 7.304814111  |
| C30 | 7.126245732   | -7.921438462 | 6.458372269  |
| C31 | 7.017485054   | -5.429816233 | 6.274129136  |
| C32 | 7.963478264   | -4.642332124 | 7.200953893  |
| C33 | 5.702857823   | -4.677278905 | 6.008088855  |
| C34 | 5.890596467   | -3.305656289 | 5.355276905  |
| C35 | 4.580062339   | -2.816324888 | 4.729516164  |
| C36 | 4.285632945   | -0.339344220 | 4.491047078  |
| C37 | 10.105570669  | -3.463797810 | 7.357714938  |
| C38 | 10.158803206  | -1.976745199 | 7.076256909  |
| C39 | -4.423863384  | -3.781431258 | -1.799440467 |
| C40 | -5.102402414  | -2.400247838 | -1.728201140 |
| C41 | -2.927533680  | -3.617209705 | -1.473797680 |
| C42 | -2.161968946  | -4.914119207 | -1.137852143 |
| C43 | -1.562119334  | -5.660878530 | -2.326093130 |
| C44 | -5.789442274  | -0.469874838 | -3.125601705 |
| C45 | -7.126983521  | -0.138109740 | -2.471430027 |
| C46 | -5.775667985  | -0.143747497 | -4.643306443 |
| C47 | -9.257483402  | -1.001606815 | -1.621722604 |
| C48 | -9.123123273  | -0.588303688 | -0.149627054 |
| C49 | -7.639907017  | -0.328037975 | 1.788776720  |
| C50 | -6.704724128  | 0.872701474  | 1.943557050  |
| C51 | -5.340623764  | 2.619060823  | 0.906800151  |
| C52 | -6.103176393  | 3.926522756  | 1.196004168  |
| C53 | -4.544424886  | 2.844190410  | -0.389792620 |
| C54 | -3.591029064  | 1.760562093  | -0.793680593 |
| C55 | -2.873216688  | 0.853554923  | -0.041870101 |
| C56 | -2.391886503  | 0.596687773  | -2.185106907 |
| C57 | -8.125701788  | 5.223966368  | 0.668622441  |
| C58 | -8.347681160  | 5.685341162  | 2.106552360  |
| C59 | -9.478010579  | 4.940233199  | -0.027144916 |
| C60 | -10.220841834 | 6.136283598  | -0.546354968 |
| C61 | -10.434953995 | 7.381447961  | 0.012593478  |
| C62 | -11.408884472 | 7.248530193  | -1.973477178 |

|      |              |              |              |
|------|--------------|--------------|--------------|
| C63  | 8.045507540  | 3.866887782  | 4.512855092  |
| C64  | 9.169032144  | 2.874778344  | 4.745574599  |
| C65  | 6.773488580  | 3.033307741  | 4.217536062  |
| C66  | 5.543949728  | 3.885023311  | 4.001614811  |
| C67  | 4.739117938  | 4.298328602  | 5.078757039  |
| C68  | 5.168311724  | 4.280048605  | 2.706555475  |
| C69  | 3.593725841  | 5.076985541  | 4.870491754  |
| C70  | 4.036530599  | 5.065750891  | 2.483407790  |
| C71  | 3.248805875  | 5.459009965  | 3.567979016  |
| C72  | 4.637816330  | 7.747671687  | -1.907100403 |
| C73  | 3.488617026  | 8.458807596  | -2.631802491 |
| C74  | 4.255090257  | 6.288172897  | -1.603853889 |
| C75  | 2.562913241  | 9.145855398  | -4.797720743 |
| C76  | 1.263902726  | 8.347030966  | -4.910737384 |
| C77  | 0.122766929  | 6.183818468  | -4.662998122 |
| C78  | -0.685504023 | 6.260180537  | -3.353413080 |
| C79  | 0.525976607  | 4.740661226  | -5.019296980 |
| C80  | -0.583232157 | 3.682055681  | -5.071436702 |
| C81  | -1.567488072 | 3.739484355  | -6.255005326 |
| C82  | -3.176602498 | 5.636330467  | -6.504704257 |
| C83  | -0.684830037 | 6.405158429  | -0.911333050 |
| C84  | -1.096325478 | 7.830159574  | -0.493695961 |
| C85  | 0.112756162  | 5.767076795  | 0.229760822  |
| C86  | -0.423441234 | 10.178098062 | -0.387353642 |
| C87  | -1.254349778 | 11.258815066 | -1.076422058 |
| C88  | -2.748850597 | 11.844319601 | -2.947086049 |
| C89  | -4.208218182 | 12.099174857 | -2.508719538 |
| C90  | -2.692199437 | 11.469201616 | -4.446674006 |
| C91  | -3.393791984 | 10.144279113 | -4.721196276 |
| C92  | -6.126402822 | 11.250580357 | -1.220379062 |
| C93  | -6.430397787 | 12.477927952 | -0.369775765 |
| C94  | -6.473121087 | 9.961168008  | -0.427224791 |
| C95  | -6.353224728 | 8.703734695  | -1.262432405 |
| C96  | -7.413086148 | 8.300485206  | -2.090140231 |
| C97  | -5.183956917 | 7.925685025  | -1.259062442 |
| C98  | -7.312964054 | 7.164116994  | -2.897004007 |
| C99  | -5.058151261 | 6.796374556  | -2.075834769 |
| C100 | -6.128052677 | 6.425008376  | -2.888890611 |
| C101 | 6.272165267  | -4.656674454 | -7.246049703 |
| C102 | 4.765685072  | -4.593099746 | -7.057166121 |
| C103 | 2.892096120  | -3.152304715 | -6.297177694 |
| C104 | 2.296891478  | -2.030464170 | -7.152358529 |
| C105 | 2.247096527  | 0.391995706  | -7.527199936 |
| C106 | 3.254733666  | 1.513708477  | -7.762140795 |
| C107 | 5.361429714  | 2.603692568  | -7.178839320 |
| C108 | 6.365982233  | 2.476586181  | -8.306631597 |
| C109 | -0.343554953 | -5.491228747 | -8.550379678 |
| C110 | -1.560430259 | -4.562125485 | -8.651924062 |
| C111 | -0.053116177 | -5.820253804 | -7.067374988 |
| C112 | 0.862346545  | -7.053318425 | -6.941690283 |
| C113 | 1.392962260  | -7.189933718 | -5.532290641 |
| C114 | -2.410302584 | -2.266656023 | -8.570742592 |
| C115 | -2.009488933 | -1.048119451 | -9.378127374 |
| C116 | -3.014932153 | -1.957693909 | -7.179417114 |
| C117 | -1.968265094 | -1.729846005 | -6.118078678 |
| C118 | -1.350699050 | -0.479131045 | -5.953959922 |
| C119 | -1.544717214 | -2.799746420 | -5.310985009 |
| C120 | -0.326650835 | -0.311212420 | -5.016722501 |
| C121 | -0.516386403 | -2.633185700 | -4.377901152 |
| C122 | 0.100767653  | -1.388299880 | -4.233379134 |
| C123 | 9.427226617  | -5.318774264 | -1.932595394 |
| C124 | 10.402636856 | -5.005671939 | -0.786942312 |

|       |              |              |              |
|-------|--------------|--------------|--------------|
| C125  | 8.084868264  | -5.860229517 | -1.418072701 |
| C126  | 7.013199586  | -6.034442618 | -2.452197634 |
| C127  | 7.031730500  | -6.856943857 | -3.561271858 |
| C128  | 5.022547307  | -5.949027463 | -3.351073686 |
| C129  | 11.543218666 | -5.721647644 | 1.238272766  |
| C130  | 12.908007935 | -5.347357254 | 0.703288118  |
| C131  | 1.559158051  | -6.815109609 | 1.573819454  |
| C132  | 2.854273920  | -6.113274949 | 1.875123020  |
| C133  | 3.971748034  | -6.358499061 | 0.781462104  |
| C134  | 4.157773153  | -7.888938127 | 0.563756045  |
| C135  | 5.372414571  | -8.217821203 | -0.320596952 |
| C136  | 5.778018607  | -9.665347302 | -0.299347765 |
| C137  | 5.300422226  | -5.826138861 | 1.402400029  |
| C138  | 4.061875101  | -0.348213785 | -1.466483624 |
| Fe139 | 4.754911963  | -1.847202976 | -2.658755331 |
| Fe140 | 2.426327048  | 0.871751385  | -1.227243308 |
| Fe141 | 5.124420233  | 1.195382160  | -0.744132845 |
| Fe142 | 4.600767050  | 0.600244557  | -3.218808580 |
| Fe143 | 4.023145508  | 3.065532592  | -2.564636037 |
| Fe144 | 5.133271833  | -1.330505905 | -0.171140797 |
| Fe145 | 2.726326791  | -1.846882318 | -1.033365197 |
| H146  | -4.878119075 | -8.028020931 | 0.790634769  |
| H147  | -5.014404074 | -7.461642389 | -0.735598947 |
| H148  | -8.850431379 | -6.094402890 | 0.298745271  |
| H149  | -7.387255020 | -7.606919074 | -0.694464573 |
| H150  | -7.298072724 | -8.401744904 | 0.875290615  |
| H151  | -7.713144511 | -3.652637074 | 1.113627743  |
| H152  | -8.821674770 | -6.323553582 | 3.225726342  |
| H153  | -9.418333180 | -4.116965027 | 1.309616595  |
| H154  | -8.701600678 | -6.523148291 | 5.537431127  |
| H155  | -6.238011814 | -6.303727434 | 3.760309001  |
| H156  | -8.772727073 | -4.750577067 | 5.679475994  |
| H157  | -2.945862848 | -2.396618209 | 3.256703434  |
| H158  | -5.045147376 | -4.348465625 | 2.924492054  |
| H159  | -3.973110023 | -6.657185852 | 4.222937398  |
| H160  | -6.024887078 | 0.136804929  | 5.813361323  |
| H161  | -6.326751455 | -2.465061412 | 4.595555505  |
| H162  | -4.221102958 | -6.214244616 | 5.928894703  |
| H163  | -4.481709881 | -2.167645052 | 2.384984553  |
| H164  | -5.658416637 | -3.204125860 | 7.206832092  |
| H165  | -7.248197521 | -1.100197270 | 6.213848485  |
| H166  | -0.187037594 | -2.689039440 | 4.399343789  |
| H167  | -0.098179261 | -1.877470803 | 2.811252887  |
| H168  | 1.243366313  | -1.714806521 | 3.951889859  |
| H169  | -1.604790933 | -0.624031205 | 4.355159755  |
| H170  | -5.164184467 | -3.765090526 | 9.394320243  |
| H171  | -3.156453761 | 2.294729150  | 4.312208973  |
| H172  | -3.468599773 | 0.917225429  | 8.543201806  |
| H173  | -4.270707569 | 4.384497701  | 7.979990876  |
| H174  | -0.244600896 | 0.645975689  | 2.667469164  |
| H175  | 0.990434325  | 0.953238205  | 3.893796341  |
| H176  | 7.881904635  | 4.412969785  | 5.462218590  |
| H177  | -4.368522930 | 3.586005675  | 4.324046334  |
| H178  | -5.025569695 | 4.753066758  | 6.410212053  |
| H179  | -2.646722252 | 3.986461143  | 4.552193096  |
| H180  | -3.343892717 | 5.242525256  | 6.728477081  |
| H181  | -4.369146906 | 2.348728642  | 6.509564529  |
| H182  | -1.490730766 | 3.381259768  | 6.724497125  |
| H183  | -2.542787894 | 0.784878405  | 5.941309383  |
| H184  | -0.646841022 | 1.626316216  | 4.091644481  |
| H185  | 0.429559495  | 4.755808438  | -0.079776654 |
| H186  | -0.567887906 | 5.675379950  | 1.092170825  |



|      |               |              |               |
|------|---------------|--------------|---------------|
| H187 | 1.506928292   | 6.391354651  | 1.464760066   |
| H188 | 1.623699495   | 6.374636770  | 4.112072949   |
| H189 | 3.744133887   | 5.332698040  | 1.467508179   |
| H190 | 5.746248422   | 3.933965216  | 1.846438436   |
| H191 | 4.999460875   | 3.999602428  | 6.098074471   |
| H192 | -1.890020104  | -1.597589775 | 6.659684830   |
| H193 | -0.840142851  | -4.422089119 | 7.770523627   |
| H194 | -0.781990438  | -3.459218667 | 9.265612045   |
| H195 | -3.013615340  | -3.545282012 | 7.308831775   |
| H196 | -5.109224944  | -2.041231006 | 9.831825337   |
| H197 | 2.968639670   | 5.377035676  | 5.716291379   |
| H198 | 0.850045688   | -0.549142506 | 6.165397310   |
| H199 | -3.808915540  | 2.292217600  | 10.929170115  |
| H200 | -3.430380562  | 0.553400075  | 10.813615310  |
| H201 | -0.858750322  | 1.458474950  | 10.645212026  |
| H202 | 11.098630862  | -3.903165739 | 7.179263047   |
| H203 | 0.119738525   | -6.675448119 | -2.909657263  |
| H204 | 2.132693017   | -8.216016896 | 2.770711287   |
| H205 | 0.286250383   | -7.957392601 | -7.184664347  |
| H206 | 1.699956237   | -6.973999114 | -7.650813161  |
| H207 | -0.993446046  | -6.015169365 | -6.529657995  |
| H208 | -1.294998333  | -1.265216546 | -10.207384554 |
| H209 | -0.688608241  | -6.420920567 | -9.029935145  |
| H210 | -2.434822249  | -3.093064847 | -2.307002152  |
| H211 | -2.828519665  | -5.624341630 | -0.617158693  |
| H212 | -0.370521233  | -2.891452724 | -8.345061857  |
| H213 | -3.205464877  | -2.743635002 | -9.178823059  |
| H214 | 1.250410615   | -4.201874568 | -8.877186296  |
| H215 | 0.208451864   | -5.987526874 | -1.289924368  |
| H216 | 0.403993125   | -4.939913499 | -6.590550915  |
| H217 | 1.487904928   | -5.728488053 | -9.445056156  |
| H218 | -5.478074655  | -4.968669945 | -3.115796797  |
| H219 | -2.855842866  | -2.956256354 | -0.597770905  |
| H220 | 3.033850621   | -6.266603570 | -6.119337949  |
| H221 | -1.357276836  | -4.669362288 | -0.431237782  |
| H222 | -4.663173880  | 2.470338446  | 1.758563702   |
| H223 | -2.835266967  | 0.659489645  | 1.025114990   |
| H224 | -8.599106154  | -0.044829400 | 2.244447551   |
| H225 | -7.124722136  | -1.172397123 | -0.101451066  |
| H226 | -7.744378202  | 3.159778962  | 0.227623104   |
| H227 | -10.111020836 | 7.829302038  | 0.945904292   |
| H228 | -8.474850032  | 4.844956441  | 2.831731270   |
| H229 | -10.112741810 | 4.341744005  | 0.650333871   |
| H230 | -7.577653626  | 6.012964327  | 0.128977587   |
| H231 | -11.982243580 | 7.553099753  | -2.845563861  |
| H232 | -3.996053589  | 3.792924659  | -0.263302947  |
| H233 | -5.255818236  | 3.000338147  | -1.216719451  |
| H234 | -11.517553601 | 9.031341458  | -0.815220026  |
| H235 | -9.273112370  | 4.300901581  | -0.899770555  |
| H236 | -6.488494707  | 1.107809183  | -0.110465608  |
| H237 | -7.228980275  | -1.147967224 | 2.395680157   |
| H238 | -9.891560203  | -0.239410274 | -2.096309215  |
| H239 | -1.923504374  | 0.201233107  | -3.081533449  |
| H240 | -9.801011360  | -1.955485251 | -1.660133912  |
| H241 | 9.063224852   | 5.431450889  | 3.668125002   |
| H242 | 7.556616407   | 5.227948994  | 3.064095879   |
| H243 | 1.033688733   | 6.226261384  | -2.201225612  |
| H244 | -1.621830872  | 5.842370099  | -1.023018791  |
| H245 | 0.503235679   | 8.638157429  | -1.500093416  |
| H246 | -4.025965829  | 2.622819311  | -3.412394818  |
| H247 | -5.593537160  | 1.831659069  | -4.623412408  |
| H248 | -5.040249117  | 3.837533003  | -3.660139164  |

|      |              |              |              |
|------|--------------|--------------|--------------|
| H249 | -4.741792200 | -0.316322201 | -4.997255151 |
| H250 | -6.431557216 | -0.859401553 | -5.165634589 |
| H251 | -1.636091391 | 11.442767197 | -4.752795399 |
| H252 | -3.203439432 | 12.259673941 | -5.010371281 |
| H253 | -1.576524513 | 9.084225137  | -4.781667773 |
| H254 | -3.033399007 | 8.128370539  | -4.758388658 |
| H255 | -2.826760694 | 7.083806564  | -7.907543739 |
| H256 | -1.871232801 | 2.718292485  | -6.526067133 |
| H257 | -8.155374976 | 6.853162485  | -3.520191407 |
| H258 | -4.347087084 | 8.181218261  | -0.601709980 |
| H259 | -4.751883032 | 5.914549897  | -5.206710419 |
| H260 | 1.275858891  | 4.399667294  | -4.287037795 |
| H261 | 2.194031896  | 6.603183347  | -4.275627583 |
| H262 | -1.147105580 | 3.652335682  | -4.126424781 |
| H263 | -7.722872564 | -2.084881668 | -2.657087650 |
| H264 | 2.954744169  | 9.303434413  | -5.812186040 |
| H265 | -5.102832728 | -2.468108891 | -3.721946109 |
| H266 | 1.039135653  | 4.776160865  | -5.995337094 |
| H267 | -4.126730390 | 6.228379461  | -2.096227227 |
| H268 | 2.280913801  | 10.126012806 | -4.389100361 |
| H269 | -1.916632636 | 5.637362071  | -8.131129350 |
| H270 | -4.721245930 | 6.973691769  | -6.573064620 |
| H271 | -3.826406954 | -4.996934597 | -3.346905457 |
| H272 | -4.880808595 | -4.361585596 | -0.973888744 |
| H273 | -8.342105181 | 8.876066446  | -2.101014054 |
| H274 | -5.063058906 | 0.190079719  | -2.629533839 |
| H275 | -0.546025063 | 6.597139478  | -5.430228301 |
| H276 | -1.072228838 | 4.156063951  | -7.141201796 |
| H277 | -0.064504718 | 2.714691076  | -5.133595821 |
| H278 | -3.427511270 | 4.049967411  | -5.254071855 |
| H279 | -0.830425566 | 10.075008849 | 0.629765191  |
| H280 | -1.913639104 | 9.916044842  | -2.482839280 |
| H281 | -2.239332773 | 12.809751795 | -2.812079404 |
| H282 | 0.597724579  | 10.573303486 | -0.301532987 |
| H283 | -4.134140156 | 10.459067803 | -1.297431149 |
| H284 | 6.654889125  | -3.667242024 | -7.535909832 |
| H285 | 6.691781093  | -4.877643011 | -6.242171896 |
| H286 | 9.251219668  | -4.355542441 | -2.432094742 |
| H287 | 7.618288919  | -5.848248374 | -8.210300224 |
| H288 | 6.125771031  | -6.512807141 | -8.067103031 |
| H289 | 5.110662371  | 5.810178867  | -1.109645159 |
| H290 | 4.144658618  | 8.568247700  | -0.111522138 |
| H291 | 4.381245753  | 8.076689498  | -4.438979077 |
| H292 | 3.398623679  | 6.271039686  | -0.914293206 |
| H293 | 5.362490366  | 9.352741347  | -0.863310660 |
| H294 | 5.905415669  | 2.692549132  | -6.225935344 |
| H295 | 5.523645083  | 7.743998618  | -2.561649131 |
| H296 | 5.153877804  | -4.574926950 | 6.958967705  |
| H297 | 7.516838344  | -5.632090785 | 5.319189809  |
| H298 | 4.633461422  | 0.766634155  | -6.391675066 |
| H299 | 4.055524455  | 1.626663383  | 3.975057482  |
| H300 | 1.880435578  | 0.064856379  | -8.508389735 |
| H301 | -0.190518710 | -3.470388941 | -3.756247002 |
| H302 | 1.390648370  | 0.853851199  | -7.007769047 |
| H303 | 3.773818141  | -2.763203161 | 5.474927100  |
| H304 | 3.252554339  | -0.694387355 | -5.941410965 |
| H305 | 4.240607298  | -3.538517656 | 3.971356627  |
| H306 | 5.099957546  | -5.322708298 | 5.348956797  |
| H307 | 6.642342267  | -3.356982007 | 4.553046538  |
| H308 | 6.245059286  | -2.567905120 | 6.094094082  |
| H309 | -3.646267021 | -2.812170238 | -6.895782628 |
| H310 | 6.191288140  | -6.740503598 | 7.772043720  |

|       |              |               |              |
|-------|--------------|---------------|--------------|
| H311  | 5.859750911  | -9.594832920  | 6.701449097  |
| H312  | 0.904010079  | -1.251226258  | -3.506813039 |
| H313  | 6.772188868  | -8.668291972  | 9.313986707  |
| H314  | 5.350371589  | -9.362412977  | 8.892106449  |
| H315  | 5.115499165  | -1.544016240  | 3.108434015  |
| H316  | 0.157872257  | 0.657244772   | -4.879668791 |
| H317  | -2.032290480 | -3.773230181  | -5.405340970 |
| H318  | 9.113955446  | -8.338428809  | 1.937411203  |
| H319  | 8.259109173  | -6.840051229  | -0.938108553 |
| H320  | 7.489262851  | -6.694387373  | 2.719639909  |
| H321  | 8.714119260  | -9.354720777  | 0.849553711  |
| H322  | 6.225712252  | 1.591637446   | -8.974176817 |
| H323  | 6.963820323  | -3.750923425  | 1.738643868  |
| H324  | 3.247080565  | -6.420035298  | 2.855944222  |
| H325  | 4.942501869  | -2.670980165  | -6.364324508 |
| H326  | 4.292305720  | -8.363321407  | 1.548551217  |
| H327  | 5.435382599  | -7.298424342  | -4.923033877 |
| H328  | 3.982431976  | -5.728071206  | -3.552268870 |
| H329  | 7.476104670  | -9.800033657  | 7.387566290  |
| H330  | 4.933900079  | 0.651739869   | 2.799863266  |
| H331  | 8.864629864  | -3.905176608  | 3.247654517  |
| H332  | 7.501721959  | -2.295837997  | 1.706395310  |
| H333  | 9.223380295  | -4.308790455  | 5.579720439  |
| H334  | 3.595467771  | -0.987949291  | 6.326265283  |
| H335  | 5.137722551  | -11.414370605 | -0.628090816 |
| H336  | 5.149075779  | -7.933863955  | -1.359854128 |
| H337  | 6.251117082  | -7.647449610  | -0.000487922 |
| H338  | 3.244640380  | -8.293366842  | 0.102837359  |
| H339  | 2.834708751  | -2.900298055  | -5.226589850 |
| H340  | -1.676950699 | 0.359940627   | -6.574017731 |
| H341  | -3.666779977 | -1.078311881  | -7.295790619 |
| H342  | 2.665693213  | -5.030907000  | 1.879500958  |
| H343  | 9.166842615  | -5.405282674  | 3.487731743  |
| H344  | 8.211128891  | -7.393874424  | 3.908912207  |
| H345  | 3.460065962  | 0.702760824   | 6.047227345  |
| H346  | 7.820322670  | -7.470640508  | -3.979989499 |
| H347  | 7.706766672  | -5.193130183  | -0.633604333 |
| H348  | 2.317990053  | -4.061832844  | -6.483122746 |
| H349  | 4.802679994  | 3.541237936   | -7.330701883 |
| H350  | 6.615719294  | 2.349823281   | 5.065065812  |
| H351  | 6.957680473  | 2.415880767   | 3.323816135  |
| H352  | 10.890260227 | -5.784849632  | -3.291994264 |
| H353  | 10.351504308 | -7.084881696  | -2.457927032 |
| H354  | 11.661025680 | -6.663381785  | 1.797818231  |
| H355  | 10.046579709 | -6.824255760  | 0.194935342  |
| H356  | 13.127427395 | -5.730169735  | -0.322413217 |
| H357  | 11.194882298 | -4.953185450  | 1.946866304  |
| H358  | 9.640390988  | 2.493081765   | 3.807716230  |
| H359  | -5.542001440 | 12.948922925  | 0.114834274  |
| H360  | 9.867511338  | -3.580062264  | 8.428557544  |
| H361  | 9.214367190  | -1.529905123  | 6.680836271  |
| H362  | -6.765197198 | 11.303917349  | -2.117024824 |
| H363  | -5.816421755 | 9.899449170   | 0.455397434  |
| H364  | -7.502513056 | 10.074255613  | -0.058107858 |
| H365  | -6.819834126 | 5.089246971   | -4.126102495 |
| H366  | 0.705590178  | -3.372186713  | 0.443179445  |
| H367  | 1.743011060  | -0.546888462  | -1.692873185 |
| H368  | -1.440033884 | -0.606494156  | -0.711787969 |
| Mo369 | 4.634283194  | -3.902270244  | -0.868494916 |
| N370  | 2.184599817  | 0.336020682   | 1.670825098  |
| N371  | 2.266706088  | 0.501230277   | 0.563841644  |
| N372  | -5.449508169 | -8.090597816  | -0.056273509 |

|      |               |              |              |
|------|---------------|--------------|--------------|
| N373 | -8.146392205  | -5.715785598 | 0.927371679  |
| N374 | -8.487409798  | -5.508583877 | 3.734316788  |
| N375 | -5.910052666  | -6.058190218 | 4.694461083  |
| N376 | -4.419922588  | -3.873256438 | 3.577966158  |
| N377 | -5.694575661  | -1.777699499 | 5.012202908  |
| N378 | -5.281070766  | -2.449233892 | 7.785886213  |
| N379 | -2.526224890  | -3.237093850 | 8.156596309  |
| N380 | -0.879151863  | -1.501358203 | 6.735655006  |
| N381 | -1.875044485  | 1.346656481  | 6.472883524  |
| N382 | -2.955720828  | 1.607651855  | 9.095742756  |
| N383 | 6.051802015   | -8.685661841 | 8.589080387  |
| N384 | 6.725551187   | -6.714365049 | 6.896677654  |
| N385 | 4.714479387   | -1.528933594 | 4.050777736  |
| N386 | 3.619503095   | -0.222469590 | 5.661788600  |
| N387 | 4.507028926   | 0.747140183  | 3.745723319  |
| N388 | 9.081840046   | -4.162072115 | 6.602539923  |
| N389 | -4.634258217  | -4.391123787 | -3.117971436 |
| N390 | -0.317069242  | -6.147061686 | -2.149381092 |
| N391 | -5.381392818  | -1.857868596 | -2.939224081 |
| N392 | -8.011234738  | -1.160911475 | -2.346315188 |
| N393 | -7.909973563  | -0.781731472 | 0.437412149  |
| N394 | -6.224058517  | 1.461980422  | 0.812395552  |
| N395 | -3.280981061  | 1.589689833  | -2.134337676 |
| N396 | -2.127820259  | 0.121486757  | -0.942546242 |
| N397 | -7.358621437  | 3.985676963  | 0.679116382  |
| N398 | -10.834376595 | 6.067087549  | -1.787359994 |
| N399 | -11.190544180 | 8.073839130  | -0.910790614 |
| N400 | 8.389656323   | 4.720220184  | 3.374883616  |
| N401 | 5.003018989   | 8.417338228  | -0.651746278 |
| N402 | 3.607936304   | 8.556354225  | -3.984665668 |
| N403 | 1.318401027   | 7.024539855  | -4.638623718 |
| N404 | -2.807608697  | 4.474710765  | -5.974475220 |
| N405 | -2.493104555  | 6.206411090  | -7.521358039 |
| N406 | -4.217074694  | 6.321759716  | -5.978239053 |
| N407 | 0.017516710   | 6.336728325  | -2.189507638 |
| N408 | -0.367650759  | 8.862811664  | -1.009152940 |
| N409 | -2.032947611  | 10.867294995 | -2.129383126 |
| N410 | -2.595632833  | 9.044125773  | -4.656513583 |
| N411 | -4.726965693  | 11.222215586 | -1.614666858 |
| N412 | 6.619323641   | -5.640185067 | -8.277040085 |
| N413 | 4.282341027   | -3.404802945 | -6.651387793 |
| N414 | 2.699735709   | -0.787064150 | -6.810968645 |
| N415 | 4.437185680   | 1.486483447  | -7.095974557 |
| N416 | 0.786911188   | -4.991340326 | -9.343809409 |
| N417 | -1.316847235  | -3.226119979 | -8.554178978 |
| N418 | 10.042780401  | -6.224750333 | -2.922109735 |
| N419 | 5.744784339   | -5.465958814 | -2.343214851 |
| N420 | 5.769282495   | -6.788321573 | -4.110138358 |
| N421 | 10.590588681  | -5.961520845 | 0.167016862  |
| N422 | -0.083421769  | 2.458291872  | -1.253046813 |
| N423 | 0.842669495   | 1.816252003  | -1.249155854 |
| O424 | -5.990192339  | -5.839163347 | 1.651946729  |
| O425 | -7.797490848  | -3.342058071 | 3.610568701  |
| O426 | -6.455710594  | -5.038811885 | 6.670816176  |
| O427 | -3.080392976  | -4.034283137 | 5.409255945  |
| O428 | -3.753459418  | -0.607711840 | 4.845693391  |
| O429 | -5.125544913  | -0.200215395 | 8.144717376  |
| O430 | -2.720273721  | -2.581929093 | 10.348636618 |
| O431 | 1.016098742   | -2.431496122 | 7.645768392  |
| O432 | 0.273408045   | 1.617454434  | 7.186202578  |
| O433 | -1.874189320  | 3.602513310  | 9.181915167  |
| O434 | -1.653097525  | 2.186590693  | 12.379101868 |

|                    |                                     |               |              |             |             |
|--------------------|-------------------------------------|---------------|--------------|-------------|-------------|
| O435               | 7.819663776                         | -8.144262069  | 5.443199704  |             |             |
| O436               | 7.692889101                         | -4.492264763  | 8.405771285  |             |             |
| O437               | 11.149155915                        | -1.292679387  | 7.282192696  |             |             |
| O438               | -5.371861671                        | -1.845564086  | -0.642817784 |             |             |
| O439               | -2.189600743                        | -5.833292152  | -3.395767019 |             |             |
| O440               | -7.368729429                        | 1.006864649   | -2.050425028 |             |             |
| O441               | -6.236159117                        | 1.153203311   | -4.960336103 |             |             |
| O442               | -10.112946695                       | -0.126314834  | 0.439066870  |             |             |
| O443               | -6.423161599                        | 1.272433102   | 3.081478674  |             |             |
| O444               | -5.577688867                        | 4.879244556   | 1.783697788  |             |             |
| O445               | -8.431478058                        | 6.850487238   | 2.457794721  |             |             |
| O446               | 9.532596174                         | 2.490044180   | 5.848053585  |             |             |
| O447               | 2.125715867                         | 6.215848403   | 3.291892439  |             |             |
| O448               | 2.501743605                         | 8.919838283   | -2.027271753 |             |             |
| O449               | 0.228823609                         | 8.940331709   | -5.279068905 |             |             |
| O450               | -1.926366367                        | 6.251038323   | -3.386292648 |             |             |
| O451               | -2.030019636                        | 7.991620722   | 0.304504792  |             |             |
| O452               | 1.238719623                         | 6.592784247   | 0.544512692  |             |             |
| O453               | -1.222870413                        | 12.422113427  | -0.654094334 |             |             |
| O454               | -4.845933839                        | 13.058841654  | -2.964154004 |             |             |
| O455               | -4.620970523                        | 10.080090942  | -4.893895528 |             |             |
| O456               | -7.560006053                        | 12.906669885  | -0.196834217 |             |             |
| O457               | -5.958735383                        | 5.308620443   | -3.720019879 |             |             |
| O458               | 4.057994589                         | -5.616111595  | -7.242605048 |             |             |
| O459               | 1.521321513                         | -2.270609136  | -8.103412324 |             |             |
| O460               | 2.936621626                         | 2.438349209   | -8.529311874 |             |             |
| O461               | 7.270299149                         | 3.276663789   | -8.486895088 |             |             |
| O462               | -2.708155142                        | -5.017307446  | -8.796235597 |             |             |
| O463               | 0.760859124                         | -7.704822570  | -4.614775481 |             |             |
| O464               | 2.611628174                         | -6.666174384  | -5.294692535 |             |             |
| O465               | -2.446697051                        | 0.079419758   | -9.199755441 |             |             |
| O466               | 11.065490669                        | -3.952076966  | -0.768893253 |             |             |
| O467               | 13.750103545                        | -4.743438732  | 1.352352481  |             |             |
| O468               | 0.682004278                         | -6.411567369  | 0.825235121  |             |             |
| O469               | 1.367270150                         | -8.025364523  | 2.195245002  |             |             |
| O470               | 6.889335111                         | -10.092606433 | 0.007209846  |             |             |
| O471               | 4.774847919                         | -10.503887136 | -0.670617552 |             |             |
| O472               | 5.855766762                         | -4.848714910  | 0.763127656  |             |             |
| O473               | 5.781372209                         | -6.368156967  | 2.425157196  |             |             |
| O474               | 3.654264418                         | -5.706408475  | -0.393019660 |             |             |
| O475               | 9.446593506                         | -4.499347828  | 3.783372924  |             |             |
| O476               | 7.501116412                         | -3.101858087  | 2.259366929  |             |             |
| O477               | -4.536903205                        | 3.133291343   | -4.124045403 |             |             |
| O478               | 9.503313075                         | -8.989747180  | 1.299570176  |             |             |
| O479               | 8.394589539                         | -6.987165720  | 3.021723458  |             |             |
| S480               | 3.824730934                         | 5.319779181   | -3.124512220 |             |             |
| S481               | 2.629533425                         | 1.571422009   | -3.549922190 |             |             |
| S482               | 3.123491495                         | -3.373826506  | -2.632519984 |             |             |
| S483               | 3.568040238                         | 2.822925246   | -0.326864635 |             |             |
| S484               | 0.579397654                         | -2.293016005  | -0.378263005 |             |             |
| S485               | 5.265411740                         | -0.976397568  | -4.641578730 |             |             |
| S486               | 3.642112252                         | -2.626996295  | 0.866746100  |             |             |
| S487               | 6.107682983                         | 2.116656663   | -2.643974436 |             |             |
| S488               | 6.502298786                         | -2.541891959  | -1.442271774 |             |             |
| S489               | 6.183731883                         | 0.227884811   | 0.989560359  |             |             |
| <b>14, 47(3/2)</b> | <b>bm2unh2b2n2x262n2ndtea.car_1</b> |               |              |             |             |
| Fe1                | 3.20                                | C1            | -6.592295081 | 2.614625417 | 6.242922969 |
| Fe2                | -0.09                               | C2            | -6.453037192 | 2.186411991 | 7.707878893 |
| Fe3                | 2.56                                | C3            | -8.129617769 | 2.876634940 | 4.342495512 |
| Fe4                | -2.83                               | C4            | -7.844696525 | 4.329999933 | 3.966937429 |
|                    |                                     | C5            | -7.742622438 | 6.662696926 | 4.679316083 |

|     |       |     |               |              |              |
|-----|-------|-----|---------------|--------------|--------------|
| Fe5 | 2.32  | C6  | -6.252048161  | 6.952644587  | 4.472308635  |
| Fe6 | -0.58 | C7  | -3.953081646  | 6.256658798  | 4.959947888  |
| Fe7 | -2.17 | C8  | -3.494200405  | 5.683467604  | 3.614699875  |
|     |       | C9  | -3.787311611  | 3.965411038  | 1.909581578  |
|     |       | C10 | -4.214762185  | 4.869268409  | 0.742190080  |
|     |       | C11 | -5.825933640  | 6.447185008  | -0.154306107 |
|     |       | C12 | -5.034042206  | 7.760589857  | -0.222873758 |
|     |       | C13 | -4.217537472  | 9.715087083  | 1.008172189  |
|     |       | C14 | -2.686415016  | 9.809629010  | 0.988443682  |
|     |       | C15 | -0.561789326  | 8.817590401  | 1.736525685  |
|     |       | C16 | 0.244938767   | 7.852781606  | 0.859833330  |
|     |       | C17 | 0.080294761   | 5.987773179  | -0.783165634 |
|     |       | C18 | -0.293067308  | 6.323313577  | -2.237454710 |
|     |       | C19 | -0.293797111  | 4.551049270  | -0.356084328 |
|     |       | C20 | 0.042618881   | 3.543057846  | -1.458545178 |
|     |       | C21 | 0.374007335   | 4.210505999  | 0.979907597  |
|     |       | C22 | -2.034987857  | 6.404313924  | -3.959387644 |
|     |       | C23 | -2.038189165  | 7.903914242  | -4.300778157 |
|     |       | C24 | -3.392559195  | 5.717510161  | -4.236903814 |
|     |       | C25 | -3.891451764  | 6.028115771  | -5.653114177 |
|     |       | C26 | -3.282231506  | 4.198673477  | -4.037207215 |
|     |       | C27 | -2.666148832  | 10.150626192 | -3.635372571 |
|     |       | C28 | -1.330172329  | 10.745827228 | -4.034573722 |
|     |       | C29 | 7.418946375   | 8.702177069  | 7.119305621  |
|     |       | C30 | 7.810616921   | 7.594043953  | 6.144593827  |
|     |       | C31 | 7.572360775   | 6.894925633  | 3.754612186  |
|     |       | C32 | 8.522801678   | 7.587692836  | 2.759698458  |
|     |       | C33 | 6.215935756   | 6.552887326  | 3.115269209  |
|     |       | C34 | 6.320303508   | 5.623995320  | 1.903325937  |
|     |       | C35 | 4.963348379   | 4.991757320  | 1.584373017  |
|     |       | C36 | 4.558012406   | 4.255194882  | -0.778045289 |
|     |       | C37 | 10.603847552  | 7.381145646  | 1.485286779  |
|     |       | C38 | 10.547715099  | 6.800949325  | 0.087748539  |
|     |       | C39 | -4.324368279  | -0.707890457 | 4.241960866  |
|     |       | C40 | -5.068994085  | -0.938292095 | 2.916052461  |
|     |       | C41 | -2.823230761  | -0.531715863 | 3.953342544  |
|     |       | C42 | -1.983267481  | 0.021981127  | 5.121300669  |
|     |       | C43 | -1.401598336  | -1.027243208 | 6.064364165  |
|     |       | C44 | -6.040437583  | -2.686298936 | 1.488870313  |
|     |       | C45 | -7.460256267  | -2.214822461 | 1.155528719  |
|     |       | C46 | -5.947092193  | -4.220722881 | 1.365992040  |
|     |       | C47 | -9.333114606  | -0.769218305 | 1.762148061  |
|     |       | C48 | -9.119142202  | 0.526956469  | 0.968478912  |
|     |       | C49 | -7.526809012  | 2.224203985  | 0.184107152  |
|     |       | C50 | -6.659882920  | 2.094272880  | -1.068408833 |
|     |       | C51 | -5.348640507  | 0.635680248  | -2.549702769 |
|     |       | C52 | -6.147826503  | 0.622561937  | -3.882068691 |
|     |       | C53 | -4.583663229  | -0.696221744 | -2.484422759 |
|     |       | C54 | -3.622957996  | -0.909307402 | -1.352143195 |
|     |       | C55 | -2.840453178  | -0.094071994 | -0.568195781 |
|     |       | C56 | -2.377288541  | -2.186508033 | -0.001903496 |
|     |       | C57 | -8.304842644  | 0.030773595  | -4.941701507 |
|     |       | C58 | -8.509944174  | 1.356847645  | -5.670066614 |
|     |       | C59 | -9.655551694  | -0.536109182 | -4.444538863 |
|     |       | C60 | -10.478916837 | -1.269607864 | -5.463567550 |
|     |       | C61 | -10.785635077 | -0.956539256 | -6.774201198 |
|     |       | C62 | -11.735348145 | -2.872622155 | -6.195660657 |
|     |       | C63 | 8.020123683   | 3.224580218  | -4.990588462 |
|     |       | C64 | 9.199237139   | 3.578255141  | -4.103180050 |
|     |       | C65 | 6.770100083   | 3.183688049  | -4.078749014 |
|     |       | C66 | 5.497339836   | 2.867239656  | -4.827982641 |
|     |       | C67 | 4.705308653   | 3.881593418  | -5.399107792 |

|      |              |              |               |
|------|--------------|--------------|---------------|
| C68  | 5.061253784  | 1.537195856  | -4.963993828  |
| C69  | 3.520120721  | 3.580134287  | -6.081468020  |
| C70  | 3.891956047  | 1.219783590  | -5.653629762  |
| C71  | 3.117993856  | 2.243858838  | -6.207109541  |
| C72  | 4.192594026  | -3.678558256 | -7.346599703  |
| C73  | 2.974914167  | -4.476783845 | -7.831757166  |
| C74  | 3.867589484  | -2.984805272 | -6.013001758  |
| C75  | 1.937068485  | -6.690322214 | -8.039725758  |
| C76  | 0.665566506  | -6.592195980 | -7.195788667  |
| C77  | -0.369383907 | -5.838430700 | -5.090150338  |
| C78  | -1.116186252 | -4.518772716 | -5.376903717  |
| C79  | 0.086714389  | -5.948605041 | -3.622538861  |
| C80  | -0.980690870 | -5.782241840 | -2.534480067  |
| C81  | -1.999116458 | -6.925004927 | -2.364031702  |
| C82  | -3.705973196 | -7.475227665 | -4.107024603  |
| C83  | -1.006035162 | -2.159871274 | -6.023773557  |
| C84  | -1.469823088 | -2.028048579 | -7.488992505  |
| C85  | -0.126821131 | -0.953894392 | -5.677201397  |
| C86  | -0.884261414 | -2.423912275 | -9.830509100  |
| C87  | -1.810905666 | -3.253531424 | -10.716949346 |
| C88  | -3.395658412 | -5.131333254 | -10.870523114 |
| C89  | -4.835543659 | -4.657268946 | -11.157999895 |
| C90  | -3.408574144 | -6.530019334 | -10.208621339 |
| C91  | -4.055067037 | -6.489175311 | -8.828370539  |
| C92  | -6.641307148 | -3.116061243 | -10.531783550 |
| C93  | -6.941227067 | -2.509423891 | -11.899484451 |
| C94  | -6.917055842 | -2.071842646 | -9.417560030  |
| C95  | -6.789919578 | -2.662119743 | -8.031895820  |
| C96  | -7.867814214 | -3.343649546 | -7.445537801  |
| C97  | -5.585852159 | -2.585367170 | -7.313000210  |
| C98  | -7.746852156 | -3.947361343 | -6.192224919  |
| C99  | -5.437752891 | -3.203029249 | -6.067534076  |
| C100 | -6.524673586 | -3.883591384 | -5.521891001  |
| C101 | 6.163602729  | -6.474300671 | 5.821135482   |
| C102 | 4.668523760  | -6.208615432 | 5.788459146   |
| C103 | 2.742282780  | -5.693541769 | 4.308827711   |
| C104 | 2.057959635  | -6.726375904 | 3.410289317   |
| C105 | 1.873384937  | -7.602490336 | 1.133613057   |
| C106 | 2.773985374  | -8.047544854 | -0.013481533  |
| C107 | 4.852348746  | -7.794993042 | -1.278883945  |
| C108 | 5.859103305  | -8.894996075 | -1.003180378  |
| C109 | -0.486657844 | -7.194046312 | 7.163735199   |
| C110 | -1.749467975 | -7.410447200 | 6.318942874   |
| C111 | -0.105480144 | -5.696086729 | 7.160871768   |
| C112 | 0.898897492  | -5.376070204 | 8.283721549   |
| C113 | 1.481996714  | -3.991425343 | 8.108059638   |
| C114 | -2.702907250 | -7.740375762 | 4.088332761   |
| C115 | -2.413785743 | -8.810296532 | 3.052371612   |
| C116 | -3.255223319 | -6.413411756 | 3.510126853   |
| C117 | -2.174079813 | -5.496171219 | 2.996014180   |
| C118 | -1.623169749 | -5.661115931 | 1.713407470   |
| C119 | -1.634850618 | -4.504796706 | 3.834848471   |
| C120 | -0.538858879 | -4.876871920 | 1.301015494   |
| C121 | -0.549786625 | -3.724588971 | 3.423533076   |
| C122 | 0.010071615  | -3.915424273 | 2.157529246   |
| C123 | 9.597786453  | -1.295737533 | 5.220269695   |
| C124 | 10.613404906 | -0.287859877 | 4.657182260   |
| C125 | 8.311624248  | -0.617821375 | 5.724359960   |
| C126 | 7.209818370  | -1.540052344 | 6.154113942   |
| C127 | 7.235890671  | -2.440967228 | 7.201242186   |
| C128 | 5.195226867  | -2.362365527 | 6.343911069   |
| C129 | 11.879641741 | 1.775574489  | 4.915674407   |

|       |              |              |              |
|-------|--------------|--------------|--------------|
| C130  | 13.203813947 | 1.112673283  | 4.606517290  |
| C131  | 1.985683576  | 2.800011321  | 6.327979652  |
| C132  | 3.244419389  | 2.896887079  | 5.508873165  |
| C133  | 4.338745592  | 1.833972429  | 5.921007067  |
| C134  | 4.612091755  | 1.935727693  | 7.448924361  |
| C135  | 5.803152800  | 1.075866023  | 7.903140231  |
| C136  | 6.284408427  | 1.388079201  | 9.292146408  |
| C137  | 5.650841513  | 2.260764810  | 5.192178768  |
| C138  | 4.010022865  | -1.547389911 | 0.535376864  |
| Fe139 | 4.679037693  | -2.487626626 | 2.205471978  |
| Fe140 | 2.334906052  | -1.353885914 | -0.744700526 |
| Fe141 | 4.964300707  | -1.199109571 | -1.154433145 |
| Fe142 | 4.397371383  | -3.478693230 | -0.096732821 |
| Fe143 | 3.739736013  | -3.193143028 | -2.639965948 |
| Fe144 | 5.180960072  | -0.131729179 | 1.181818336  |
| Fe145 | 2.780092621  | -0.822264678 | 1.916150141  |
| H146  | -4.489416277 | 2.693401554  | 7.926720800  |
| H147  | -4.724594409 | 1.093743251  | 7.689389510  |
| H148  | -8.584744867 | 2.101382057  | 6.281541697  |
| H149  | -7.092268720 | 1.309375458  | 7.892371698  |
| H150  | -6.880880377 | 3.007159316  | 8.310618054  |
| H151  | -7.521950565 | 2.261153997  | 3.664107033  |
| H152  | -8.376427274 | 4.967612848  | 5.845652836  |
| H153  | -9.188912727 | 2.666269676  | 4.142840631  |
| H154  | -8.103725094 | 7.256139238  | 5.529969142  |
| H155  | -5.755242216 | 5.355761401  | 5.661003144  |
| H156  | -8.260673734 | 7.006431658  | 3.774361599  |
| H157  | -2.708353761 | 3.796167242  | 1.799334846  |
| H158  | -4.719886261 | 4.034769166  | 3.849923668  |
| H159  | -3.451532064 | 5.719746888  | 5.776023630  |
| H160  | -5.732529754 | 5.959633385  | -1.133114927 |
| H161  | -5.985760853 | 5.357438746  | 1.696857785  |
| H162  | -3.636428879 | 7.305934064  | 4.985130716  |
| H163  | -4.294367932 | 2.992451230  | 1.832282047  |
| H164  | -5.185568328 | 7.997497936  | 1.827961760  |
| H165  | -6.884582584 | 6.685845786  | 0.020014072  |
| H166  | 0.086827605  | 4.929749355  | 1.761210367  |
| H167  | 0.065393052  | 3.209700716  | 1.316178801  |
| H168  | 1.470908793  | 4.204145023  | 0.894911171  |
| H169  | -1.384061956 | 4.528658698  | -0.201676630 |
| H170  | -4.562851379 | 10.202763965 | 1.931830227  |
| H171  | -3.002841577 | 3.930318715  | -3.008231564 |
| H172  | -3.090769328 | 8.358632055  | -2.566104088 |
| H173  | -4.059091350 | 7.102264063  | -5.812453138 |
| H174  | -0.152046377 | 2.520936730  | -1.105203522 |
| H175  | 1.102269887  | 3.592576159  | -1.745079630 |
| H176  | 7.885886154  | 4.055165413  | -5.710626259 |
| H177  | -4.249389390 | 3.719715384  | -4.250188234 |
| H178  | -4.842464653 | 5.505749219  | -5.832955762 |
| H179  | -2.530809139 | 3.772330646  | -4.722100315 |
| H180  | -3.165554019 | 5.684018829  | -6.407056083 |
| H181  | -4.128280034 | 6.115050418  | -3.514569889 |
| H182  | -1.276586487 | 5.967655112  | -4.627259015 |
| H183  | -2.275398974 | 5.807229758  | -1.903571602 |
| H184  | -0.564163245 | 3.708519282  | -2.359942555 |
| H185  | 0.248132232  | -1.073338013 | -4.646482882 |
| H186  | -0.771012463 | -0.060763086 | -5.716923410 |
| H187  | 1.252044480  | 0.074898420  | -6.627019873 |
| H188  | 1.470331030  | 2.672592484  | -7.144785055 |
| H189  | 3.556291783  | 0.185399262  | -5.721495251 |
| H190  | 5.627378733  | 0.733840472  | -4.488728185 |
| H191  | 5.007557489  | 4.928466686  | -5.298736216 |



|      |               |              |               |
|------|---------------|--------------|---------------|
| H192 | -1.502013716  | 7.033021165  | 0.215598440   |
| H193 | -0.298540139  | 8.600481631  | 2.782596368   |
| H194 | -0.214628455  | 9.833276431  | 1.506842012   |
| H195 | -2.515787639  | 8.043060070  | 2.068223182   |
| H196 | -4.576043398  | 10.305068987 | 0.154342302   |
| H197 | 2.904573217   | 4.382367440  | -6.498300336  |
| H198 | 1.169068168   | 6.116277921  | -0.727329649  |
| H199 | -3.407713272  | 10.395256547 | -4.413183425  |
| H200 | -2.975365850  | 10.648947424 | -2.702087981  |
| H201 | -0.437346617  | 10.232960582 | -3.607020829  |
| H202 | 11.612651173  | 7.233965374  | 1.899236032   |
| H203 | 0.276448924   | -1.449285311 | 7.159398782   |
| H204 | 2.678760253   | 4.230910476  | 7.422376157   |
| H205 | 0.382141695   | -5.408429846 | 9.254161384   |
| H206 | 1.704948051   | -6.123985608 | 8.295814293   |
| H207 | -1.002764296  | -5.073522449 | 7.298154457   |
| H208 | -1.731971374  | -9.619001939 | 3.406031718   |
| H209 | -0.810857520  | -7.447868946 | 8.184789561   |
| H210 | -2.407765405  | -1.493709423 | 3.616176075   |
| H211 | -2.589681210  | 0.713572160  | 5.733372886   |
| H212 | -0.623490210  | -7.527287207 | 4.579015639   |
| H213 | -3.504545542  | -8.183700109 | 4.713864471   |
| H214 | 1.029448152   | -7.882527885 | 5.920171586   |
| H215 | 0.385168473   | 0.022844766  | 6.193306774   |
| H216 | 0.312477309   | -5.433690461 | 6.176794401   |
| H217 | 1.297813473   | -8.143117649 | 7.524226219   |
| H218 | -5.343570314  | -1.580696133 | 5.814861662   |
| H219 | -2.727378296  | 0.169115889  | 3.112076150   |
| H220 | 3.073885622   | -4.822673469 | 7.299129099   |
| H221 | -1.155024576  | 0.610101380  | 4.701396913   |
| H222 | -4.650331149  | 1.481206239  | -2.634735597  |
| H223 | -2.762933124  | 0.986196414  | -0.530751731  |
| H224 | -8.476502326  | 2.676337311  | -0.132476508  |
| H225 | -7.081032132  | 0.531976581  | 1.409899189   |
| H226 | -7.845734945  | 0.133454151  | -2.846469125  |
| H227 | -10.497643515 | -0.130125729 | -7.414867018  |
| H228 | -8.558171849  | 2.242226001  | -4.990467347  |
| H229 | -10.238577034 | 0.274784232  | -3.972622204  |
| H230 | -7.825532986  | -0.681038030 | -5.630970554  |
| H231 | -12.324265490 | -3.780906017 | -6.285366684  |
| H232 | -4.032951134  | -0.784706209 | -3.435016428  |
| H233 | -5.313879155  | -1.521663954 | -2.478169989  |
| H234 | -11.976510125 | -2.074797896 | -8.154526605  |
| H235 | -9.434574588  | -1.260339385 | -3.644770288  |
| H236 | -6.363523948  | 0.081124278  | -0.729166815  |
| H237 | -7.039932932  | 2.947710438  | 0.854972998   |
| H238 | -9.995288471  | -1.405296380 | 1.161163967   |
| H239 | -1.922367156  | -3.051418430 | 0.474312730   |
| H240 | -9.858676991  | -0.520148201 | 2.693025131   |
| H241 | 8.945790240   | 2.019212832  | -6.364524725  |
| H242 | 7.401709973   | 1.585790944  | -6.048566462  |
| H243 | 0.657490980   | -3.484248700 | -5.643454787  |
| H244 | -1.917690384  | -2.099491829 | -5.413263621  |
| H245 | 0.057753331   | -3.244664490 | -8.128484100  |
| H246 | -3.727844837  | -3.058335840 | -1.406062974  |
| H247 | -5.341594427  | -4.640571621 | -1.377933825  |
| H248 | -5.386024587  | -4.268940304 | -2.923817604  |
| H249 | -4.905977154  | -4.534100004 | 1.524906444   |
| H250 | -6.579929379  | -4.698767615 | 2.132717184   |
| H251 | -2.373508986  | -6.898409593 | -10.161107030 |
| H252 | -3.996362566  | -7.198429321 | -10.849929520 |
| H253 | -2.188667480  | -6.502671074 | -7.849682420  |

|      |              |              |               |
|------|--------------|--------------|---------------|
| H254 | -3.590737337 | -6.196007152 | -6.859042129  |
| H255 | -3.482332287 | -9.166694382 | -5.240760178  |
| H256 | -2.272159534 | -7.024819476 | -1.303645750  |
| H257 | -8.600944955 | -4.458679176 | -5.742388820  |
| H258 | -4.734699163 | -2.025463989 | -7.711187801  |
| H259 | -5.217326072 | -6.166237544 | -4.614317212  |
| H260 | 0.867628195  | -5.192566526 | -3.443015628  |
| H261 | 1.682915955  | -5.624717603 | -5.675747215  |
| H262 | -1.515091312 | -4.826586659 | -2.653731404  |
| H263 | -7.666792140 | -1.360259827 | 2.988355158   |
| H264 | 2.282372386  | -7.732412334 | -8.004514498  |
| H265 | -5.304389094 | -2.814866022 | 3.563627702   |
| H266 | 0.570705678  | -6.932493303 | -3.504321961  |
| H267 | -4.476132986 | -3.182661431 | -5.550522694  |
| H268 | -7.104481610 | -4.073959959 | -0.196262411  |
| H269 | 1.636717476  | -6.473689329 | -9.074448650  |
| H270 | -2.518497312 | -9.133226606 | -3.806753916  |
| H271 | -5.305376473 | -7.725668225 | -5.355468449  |
| H272 | -3.730996118 | -2.007348100 | 5.725696123   |
| H273 | -4.704593682 | 0.262347422  | 4.615724825   |
| H274 | -8.825199223 | -3.399967785 | -7.969393719  |
| H275 | -5.425964664 | -2.247576133 | 0.684906420   |
| H276 | -1.092849076 | -6.631107185 | -5.324584584  |
| H277 | -1.538946752 | -7.878579942 | -2.652392331  |
| H278 | -0.429295990 | -5.704779685 | -1.587411338  |
| H279 | -3.815664626 | -5.903954625 | -2.823017324  |
| H280 | -1.210002703 | -1.377865065 | -9.930104379  |
| H281 | -2.431968784 | -4.362314487 | -9.104454143  |
| H282 | -2.923910349 | -5.227519271 | -11.859849957 |
| H283 | 0.120460013  | -2.507077221 | -10.267021777 |
| H284 | -4.624801062 | -3.151829681 | -9.795231226  |
| H285 | 6.479855851  | -6.956101861 | 4.884159008   |
| H286 | 6.644168595  | -5.474106618 | 5.842905183   |
| H287 | 9.342416102  | -1.949685309 | 4.373801342   |
| H288 | 7.515033033  | -7.300822625 | 7.104630271   |
| H289 | 6.077708863  | -6.932770881 | 7.800600818   |
| H290 | 4.767428645  | -2.457367826 | -5.672161854  |
| H291 | 3.798750206  | -2.119849142 | -8.597670882  |
| H292 | 3.820141898  | -6.215510638 | -7.142181470  |
| H293 | 3.061925737  | -2.252665566 | -6.170079869  |
| H294 | 4.937684784  | -3.138786783 | -9.176021219  |
| H295 | 5.395626051  | -6.888993231 | -1.589778264  |
| H296 | 5.033437803  | -4.370494947 | -7.181998594  |
| H297 | 5.709349498  | 7.491110367  | 2.833313347   |
| H298 | 8.034811668  | 5.975442600  | 4.133915698   |
| H299 | 4.299544668  | -6.715051890 | 0.469600897   |
| H300 | 4.283371175  | 3.368371559  | -2.607071332  |
| H301 | 1.557782953  | -8.507531192 | 1.669035521   |
| H302 | -0.129685225 | -2.968896690 | 4.089965725   |
| H303 | 0.964313901  | -7.187304197 | 0.667868552   |
| H304 | 4.198481135  | 5.757047399  | 1.392628882   |
| H305 | 3.012610848  | -5.881805702 | 1.814425734   |
| H306 | 4.606357032  | 4.418391333  | 2.453114780   |
| H307 | 5.609398998  | 6.072657183  | 3.900494677   |
| H308 | 7.030112780  | 4.807213286  | 2.104108687   |
| H309 | 6.690486978  | 6.174244960  | 1.023450055   |
| H310 | -3.818452220 | -5.914518074 | 4.311473355   |
| H311 | 6.872636903  | 8.672348234  | 4.751701156   |
| H312 | 6.656521837  | 8.264531231  | 7.781962044   |
| H313 | 0.861489643  | -3.313313463 | 1.830825740   |
| H314 | 7.609725816  | 10.561754064 | 6.253736349   |
| H315 | 6.210154649  | 10.368015376 | 7.082708793   |

|       |              |              |               |
|-------|--------------|--------------|---------------|
| H316  | 5.423132282  | 3.134955919  | 0.652861129   |
| H317  | -0.095017968 | -5.010551931 | 0.311524245   |
| H318  | -2.066165439 | -4.340689422 | 4.824941282   |
| H319  | 9.638440460  | 3.152033849  | 7.415296660   |
| H320  | 8.570782175  | 0.026129411  | 6.584215298   |
| H321  | 7.956309727  | 3.653028810  | 5.708167526   |
| H322  | 9.243796101  | 2.314740113  | 8.645458253   |
| H323  | 5.804265472  | -9.353169671 | 0.014196597   |
| H324  | 7.216680902  | 2.109798177  | 3.044319964   |
| H325  | 3.684274707  | 3.902835685  | 5.581305210   |
| H326  | 4.759027466  | -5.985977476 | 3.753342701   |
| H327  | 4.817716646  | 2.990756161  | 7.689241120   |
| H328  | 5.629613953  | -3.621283582 | 7.988592945   |
| H329  | 4.140251820  | -2.568533581 | 6.213271432   |
| H330  | 8.306199358  | 8.896867566  | 7.745358956   |
| H331  | 5.098709023  | 2.362291127  | -1.407716336  |
| H332  | 9.203689828  | 3.516875269  | 2.833435936   |
| H333  | 7.766837616  | 1.742330352  | 1.642069600   |
| H334  | 9.693287165  | 5.867739723  | 2.723671655   |
| H335  | 4.003052222  | 6.222855961  | -0.527000250  |
| H336  | 5.719692895  | 1.471998421  | 11.095722333  |
| H337  | 5.515049629  | 0.015142414  | 7.864968147   |
| H338  | 6.661688058  | 1.217399443  | 7.238486511   |
| H339  | 3.707694982  | 1.628107471  | 7.993192481   |
| H340  | 2.706085075  | -4.690847971 | 3.853309563   |
| H341  | -2.035845790 | -6.425880753 | 1.050131155   |
| H342  | -3.964817056 | -6.682137419 | 2.712152862   |
| H343  | 2.989429213  | 2.683818848  | 4.461550477   |
| H344  | 9.599414731  | 4.060720151  | 4.228883349   |
| H345  | 8.743471793  | 4.935465145  | 6.121449770   |
| H346  | 3.757142734  | 5.590769707  | -2.101894078  |
| H347  | 8.039614876  | -2.748728254 | 7.859758275   |
| H348  | 7.926185227  | 0.046919878  | 4.941067013   |
| H349  | 2.217176481  | -5.674553961 | 5.266451264   |
| H350  | 4.226842282  | -8.114769653 | -2.127085637  |
| H351  | 6.688577475  | 4.163825865  | -3.585332517  |
| H352  | 6.936114934  | 2.428563865  | -3.294491396  |
| H353  | 11.009311951 | -2.644707790 | 5.850769559   |
| H354  | 10.609921721 | -1.550099727 | 6.999263825   |
| H355  | 12.061586199 | 2.500853296  | 5.724810244   |
| H356  | 10.383870214 | 1.056431695  | 6.251178012   |
| H357  | 13.401077292 | 0.171228627  | 5.174721939   |
| H358  | 11.527162383 | 2.338978569  | 4.037009380   |
| H359  | 9.664544388  | 2.700524693  | -3.591236544  |
| H360  | -6.048110229 | -2.178097435 | -12.479249534 |
| H361  | 10.425990034 | 8.466090131  | 1.392425487   |
| H362  | 9.559029005  | 6.379114166  | -0.216914891  |
| H363  | -7.325418903 | -3.970114790 | -10.398622834 |
| H364  | -6.222289680 | -1.225927559 | -9.540604117  |
| H365  | -7.933905250 | -1.685941108 | -9.579275079  |
| H366  | -7.208419963 | -4.897367599 | -4.006555016  |
| H367  | 0.610407946  | 1.152444785  | 1.920737292   |
| H368  | 1.742418728  | -1.550273103 | 0.764601666   |
| H369  | -1.296723071 | -0.611327231 | 0.912665768   |
| M0370 | 4.738343239  | -0.320905793 | 3.832301312   |
| N371  | 2.257964169  | 1.614313556  | -0.639520170  |
| N372  | 2.284944123  | 0.493052006  | -0.625373246  |
| N373  | -5.103473180 | 1.912085934  | 8.171691524   |
| N374  | -7.854353813 | 2.547909268  | 5.732451770   |
| N375  | -8.035670296 | 5.261473746  | 4.933810000   |
| N376  | -5.390144489 | 6.167908148  | 5.165564942   |
| N377  | -4.087050689 | 4.528626197  | 3.218392107   |

|      |               |              |               |
|------|---------------|--------------|---------------|
| N378 | -5.378504724  | 5.546091839  | 0.895874246   |
| N379 | -4.797180822  | 8.381363871  | 0.962142534   |
| N380 | -2.006258923  | 8.782678744  | 1.574291425   |
| N381 | -0.489694391  | 6.987153721  | 0.116631191   |
| N382 | -1.605109019  | 6.178589101  | -2.578992761  |
| N383 | -2.579965741  | 8.728884852  | -3.369791941  |
| N384 | 6.865828211   | 9.891997981  | 6.461531773   |
| N385 | 7.364089900   | 7.782378384  | 4.890264383   |
| N386 | 5.023622313   | 4.058182277  | 0.461099820   |
| N387 | 3.925638081   | 5.402310002  | -1.118391836  |
| N388 | 4.698570946   | 3.283632283  | -1.684048671  |
| N389 | 9.591172697   | 6.844836863  | 2.375117263   |
| N390 | -4.586447239  | -1.817575729 | 5.169651171   |
| N391 | -0.158460846  | -0.779081461 | 6.518109794   |
| N392 | -5.522138146  | -2.210733945 | 2.753206129   |
| N393 | -8.114649933  | -1.489400360 | 2.083870255   |
| N394 | -7.837343826  | 0.994578841  | 0.891834064   |
| N395 | -6.194019301  | 0.844296492  | -1.380130403  |
| N396 | -3.313429259  | -2.209161820 | -0.966530919  |
| N397 | -2.085690129  | -0.907765701 | 0.259260894   |
| N398 | -7.448495061  | 0.245786305  | -3.776279396  |
| N399 | -11.079322654 | -2.468394476 | -5.114897769  |
| N400 | -11.581910461 | -1.989284693 | -7.221800499  |
| N401 | 8.263527763   | 1.920334872  | -5.608814203  |
| N402 | 4.620359815   | -2.668349073 | -8.323107546  |
| N403 | 3.031879505   | -5.824798506 | -7.651967747  |
| N404 | 0.781946363   | -6.041865907 | -5.966228220  |
| N405 | -3.251110843  | -6.726811539 | -3.104018557  |
| N406 | -3.114608979  | -8.634917096 | -4.458054490  |
| N407 | -4.743604132  | -7.039477561 | -4.857760457  |
| N408 | -0.362965369  | -3.435045792 | -5.714848421  |
| N409 | -0.804749765  | -2.772845733 | -8.418463830  |
| N410 | -2.591049481  | -4.187999585 | -10.098172530 |
| N411 | -3.193993892  | -6.298720991 | -7.792523207  |
| N412 | -5.265110163  | -3.578710262 | -10.459709242 |
| N413 | 6.503530583   | -7.332455230 | 6.959223230   |
| N414 | 4.131256241   | -6.054837902 | 4.562747396   |
| N415 | 2.417814648   | -6.675943454 | 2.109567012   |
| N416 | 4.002352099   | -7.481829462 | -0.143976954  |
| N417 | 0.573700513   | -8.144614077 | 6.802818009   |
| N418 | -1.565039876  | -7.590397468 | 4.980243846   |
| N419 | 10.216847639  | -2.141789259 | 6.260240599   |
| N420 | 5.919801516   | -1.510201748 | 5.624785309   |
| N421 | 5.957675219   | -2.946709504 | 7.302894828   |
| N422 | 10.890555048  | 0.823868774  | 5.396632677   |
| N423 | -0.270032518  | -1.497470334 | -2.103406916  |
| N424 | 0.699359395   | -1.438874078 | -1.525883632  |
| O425 | -5.639301716  | 3.059708206  | 5.577039298   |
| O426 | -7.463544822  | 4.622958511  | 2.821401326   |
| O427 | -5.884963396  | 7.877227531  | 3.728798681   |
| O428 | -2.639919647  | 6.259521810  | 2.922160612   |
| O429 | -3.520619136  | 4.966228045  | -0.281763276  |
| O430 | -4.677499421  | 8.234145465  | -1.314725991  |
| O431 | -2.139648821  | 10.807552734 | 0.499277737   |
| O432 | 1.484831889   | 7.886754670  | 0.879383814   |
| O433 | 0.563595586   | 6.700807918  | -3.049622316  |
| O434 | -1.561408617  | 8.338316213  | -5.361853484  |
| O435 | -1.225252609  | 11.758238521 | -4.712109758  |
| O436 | 8.468389153   | 6.614546390  | 6.556454060   |
| O437 | 8.299958348   | 8.747756448  | 2.371111723   |
| O438 | 11.501114773  | 6.796958628  | -0.675062640  |
| O439 | -5.247717655  | -0.036311070 | 2.071681331   |

|                    |                                      |              |               |             |             |
|--------------------|--------------------------------------|--------------|---------------|-------------|-------------|
| O440               | -2.041731620                         | -2.048144538 | 6.410159553   |             |             |
| O441               | -7.937028719                         | -2.470685738 | 0.028478150   |             |             |
| O442               | -6.344021741                         | -4.658918310 | 0.057202937   |             |             |
| O443               | -10.092254022                        | 1.089722569  | 0.453908627   |             |             |
| O444               | -6.419624222                         | 3.085920329  | -1.760097580  |             |             |
| O445               | -5.588680959                         | 0.863717552  | -4.955620640  |             |             |
| O446               | -8.643265059                         | 1.469484990  | -6.876201106  |             |             |
| O447               | 9.615131933                          | 4.714845233  | -3.927539585  |             |             |
| O448               | 1.950455075                          | 1.877404311  | -6.848627584  |             |             |
| O449               | 1.989993284                          | -3.928249728 | -8.361391893  |             |             |
| O450               | -0.397618057                         | -7.052098817 | -7.660120551  |             |             |
| O451               | -2.354839569                         | -4.480395390 | -5.295430067  |             |             |
| O452               | -2.384123404                         | -1.242300949 | -7.776387874  |             |             |
| O453               | 0.948767320                          | -0.856428843 | -6.614346421  |             |             |
| O454               | -1.844346019                         | -3.046750331 | -11.936658067 |             |             |
| O455               | -5.540609284                         | -5.248696943 | -11.988465850 |             |             |
| O456               | -5.286607840                         | -6.530527595 | -8.680919454  |             |             |
| O457               | -8.075241585                         | -2.362720441 | -12.326578492 |             |             |
| O458               | -6.346458966                         | -4.533336928 | -4.287351425  |             |             |
| O459               | 4.016550268                          | -6.112250217 | 6.859342454   |             |             |
| O460               | 1.245265572                          | -7.560274157 | 3.865900143   |             |             |
| O461               | 2.335324195                          | -8.902986363 | -0.799843425  |             |             |
| O462               | 6.678497898                          | -9.266057930 | -1.827700053  |             |             |
| O463               | -2.879202845                         | -7.395007101 | 6.835609161   |             |             |
| O464               | 0.890880501                          | -2.963893724 | 8.427178551   |             |             |
| O465               | 2.695762077                          | -3.916814967 | 7.529400499   |             |             |
| O466               | -2.907769457                         | -8.844065405 | 1.934230186   |             |             |
| O467               | 11.235401246                         | -0.515557046 | 3.602561907   |             |             |
| O468               | 14.041722194                         | 1.592214984  | 3.856684889   |             |             |
| O469               | 1.067080930                          | 2.016405892  | 6.143593748   |             |             |
| O470               | 1.883580195                          | 3.665420657  | 7.390342531   |             |             |
| O471               | 7.424602919                          | 1.730333196  | 9.596362946   |             |             |
| O472               | 5.312614445                          | 1.246549098  | 10.231802019  |             |             |
| O473               | 6.099501291                          | 1.412035887  | 4.327775296   |             |             |
| O474               | 6.215992850                          | 3.339967081  | 5.487035442   |             |             |
| O475               | 3.935346906                          | 0.562805079  | 5.550072205   |             |             |
| O476               | 9.843097949                          | 4.135106367  | 3.268977303   |             |             |
| O477               | 7.761482054                          | 2.467371754  | 2.296383128   |             |             |
| O478               | -4.773013298                         | -4.480688396 | -2.180601109  |             |             |
| O479               | 10.032997883                         | 2.634744715  | 8.162297742   |             |             |
| O480               | 8.878672049                          | 3.976244449  | 5.899873036   |             |             |
| S481               | 3.333461071                          | -4.177860664 | -4.702176060  |             |             |
| S482               | 2.352517227                          | -3.778663592 | -0.961636557  |             |             |
| S483               | 3.100132504                          | -2.060296821 | 3.734706395   |             |             |
| S484               | 3.418565475                          | -0.918840191 | -2.801210042  |             |             |
| S485               | 0.516046955                          | -0.128017111 | 2.368387568   |             |             |
| S486               | 5.051168237                          | -4.634235144 | 1.689758440   |             |             |
| S487               | 3.722343287                          | 1.173800796  | 2.254088646   |             |             |
| S488               | 5.853428157                          | -3.242766205 | -1.758725468  |             |             |
| S489               | 6.525877717                          | -1.249864250 | 2.565115726   |             |             |
| S490               | 6.211058050                          | 0.590006186  | -0.633125197  |             |             |
| <b>14, 35(3/2)</b> | <b>bm2unh2b2n2x262n2n35dtb.car_4</b> |              |               |             |             |
| Fe1                | 3.21                                 | C1           | -6.588029107  | 2.611032142 | 6.241229716 |
| Fe2                | 0.06                                 | C2           | -6.444649746  | 2.181994091 | 7.705224045 |
| Fe3                | -2.43                                | C3           | -8.129254001  | 2.870479566 | 4.342532361 |
| Fe4                | 2.95                                 | C4           | -7.843340770  | 4.323208950 | 3.968059751 |
| Fe5                | -2.35                                | C5           | -7.742016265  | 6.656490954 | 4.680980403 |
| Fe6                | -1.87                                | C6           | -6.252366828  | 6.948317226 | 4.473651340 |
| Fe7                | 2.38                                 | C7           | -3.952282088  | 6.256077397 | 4.959982030 |
|                    |                                      | C8           | -3.492393731  | 5.682385331 | 3.615300945 |
|                    |                                      | C9           | -3.787841393  | 3.967088349 | 1.908019545 |

|     |               |              |              |
|-----|---------------|--------------|--------------|
| C10 | -4.214308951  | 4.875672469  | 0.743585019  |
| C11 | -5.827606858  | 6.450605912  | -0.151601958 |
| C12 | -5.033588393  | 7.762911514  | -0.218544539 |
| C13 | -4.211354581  | 9.712431326  | 1.016280550  |
| C14 | -2.680306453  | 9.805655339  | 0.989591183  |
| C15 | -0.553970419  | 8.812768053  | 1.731584283  |
| C16 | 0.248494334   | 7.848031807  | 0.851218106  |
| C17 | 0.079330893   | 5.985873652  | -0.790352566 |
| C18 | -0.297094484  | 6.316637844  | -2.244521698 |
| C19 | -0.291508301  | 4.547607433  | -0.362080238 |
| C20 | 0.037366455   | 3.537532888  | -1.465255680 |
| C21 | 0.385666766   | 4.202389854  | 0.968202204  |
| C22 | -2.045309009  | 6.402377747  | -3.961163358 |
| C23 | -2.044527332  | 7.903369807  | -4.301139403 |
| C24 | -3.406141950  | 5.718767084  | -4.234237047 |
| C25 | -3.907130768  | 6.033417368  | -5.648781631 |
| C26 | -3.298920466  | 4.200507334  | -4.036035303 |
| C27 | -2.669250309  | 10.151051437 | -3.636254962 |
| C28 | -1.331650171  | 10.741566689 | -4.035456722 |
| C29 | 7.410216505   | 8.689583915  | 7.122179938  |
| C30 | 7.807286626   | 7.585439495  | 6.145737371  |
| C31 | 7.572955374   | 6.889685498  | 3.753755200  |
| C32 | 8.522632398   | 7.581071515  | 2.757921828  |
| C33 | 6.213970847   | 6.550994222  | 3.118484086  |
| C34 | 6.309074174   | 5.624764532  | 1.903695649  |
| C35 | 4.949184730   | 4.992531147  | 1.595308948  |
| C36 | 4.539356859   | 4.253080891  | -0.764987635 |
| C37 | 10.604880443  | 7.373225982  | 1.485286607  |
| C38 | 10.549314916  | 6.796245554  | 0.086600834  |
| C39 | -4.320085503  | -0.714778176 | 4.243782459  |
| C40 | -5.062988038  | -0.943454936 | 2.916031286  |
| C41 | -2.819024910  | -0.534114976 | 3.957641296  |
| C42 | -1.981958076  | 0.018073034  | 5.128747413  |
| C43 | -1.399051512  | -1.032187371 | 6.069243108  |
| C44 | -6.039122955  | -2.692111868 | 1.491270038  |
| C45 | -7.460714061  | -2.223332265 | 1.164297262  |
| C46 | -5.942504868  | -4.226589981 | 1.369952360  |
| C47 | -9.326342182  | -0.769095356 | 1.774255780  |
| C48 | -9.114062072  | 0.524563453  | 0.976035793  |
| C49 | -7.524266800  | 2.220622628  | 0.183127295  |
| C50 | -6.657515417  | 2.090946274  | -1.069441971 |
| C51 | -5.351407174  | 0.630096149  | -2.553093604 |
| C52 | -6.149614176  | 0.616177825  | -3.885390163 |
| C53 | -4.586305763  | -0.701447734 | -2.485101967 |
| C54 | -3.623537716  | -0.905001189 | -1.353257050 |
| C55 | -2.846901253  | -0.079350507 | -0.574599625 |
| C56 | -2.368107728  | -2.164389519 | 0.006148883  |
| C57 | -8.311290850  | 0.034033728  | -4.944590645 |
| C58 | -8.509847920  | 1.360827605  | -5.674693830 |
| C59 | -9.662550539  | -0.530083362 | -4.446724530 |
| C60 | -10.483836093 | -1.263304551 | -5.466120684 |
| C61 | -10.785519835 | -0.950645662 | -6.777581049 |
| C62 | -11.738088663 | -2.866351928 | -6.201823074 |
| C63 | 8.029280597   | 3.215244271  | -5.000841493 |
| C64 | 9.213489006   | 3.564908948  | -4.118250719 |
| C65 | 6.782088148   | 3.171704628  | -4.082579571 |
| C66 | 5.508020494   | 2.857413885  | -4.829831040 |
| C67 | 4.717651590   | 3.872117478  | -5.401641281 |
| C68 | 5.072112995   | 1.527436917  | -4.968915398 |
| C69 | 3.533200160   | 3.572385022  | -6.085473326 |
| C70 | 3.903589085   | 1.211315571  | -5.661184044 |
| C71 | 3.129371949   | 2.236700653  | -6.212853571 |

|      |              |              |               |
|------|--------------|--------------|---------------|
| C72  | 4.206794840  | -3.692736934 | -7.354820444  |
| C73  | 2.983832127  | -4.485029374 | -7.833121465  |
| C74  | 3.899786460  | -3.017050124 | -6.007965023  |
| C75  | 1.935488605  | -6.693352589 | -8.034446608  |
| C76  | 0.668266083  | -6.588076006 | -7.187017300  |
| C77  | -0.363835132 | -5.834668462 | -5.081523793  |
| C78  | -1.114775383 | -4.521002254 | -5.376503920  |
| C79  | 0.091789598  | -5.932701059 | -3.612495508  |
| C80  | -0.980210332 | -5.767369055 | -2.529716136  |
| C81  | -1.993946008 | -6.915099448 | -2.359139167  |
| C82  | -3.702864557 | -7.467119567 | -4.100744113  |
| C83  | -1.007920207 | -2.164021316 | -6.030987611  |
| C84  | -1.467610754 | -2.028855334 | -7.497628464  |
| C85  | -0.131386599 | -0.958107806 | -5.676530466  |
| C86  | -0.883214856 | -2.430023324 | -9.838621425  |
| C87  | -1.815741905 | -3.257427805 | -10.721504085 |
| C88  | -3.401712178 | -5.135196248 | -10.869905453 |
| C89  | -4.842296179 | -4.664184434 | -11.159002035 |
| C90  | -3.411256402 | -6.531845857 | -10.205309107 |
| C91  | -4.056647403 | -6.489490598 | -8.824286932  |
| C92  | -6.652166001 | -3.121849557 | -10.537360709 |
| C93  | -6.947789665 | -2.514052963 | -11.904274799 |
| C94  | -6.923384549 | -2.075895036 | -9.423230372  |
| C95  | -6.795182250 | -2.663276453 | -8.035744311  |
| C96  | -7.873242546 | -3.341901922 | -7.446299282  |
| C97  | -5.590873993 | -2.584516869 | -7.316510975  |
| C98  | -7.752316494 | -3.941994654 | -6.191275801  |
| C99  | -5.442923457 | -3.198783850 | -6.069442631  |
| C100 | -6.529965616 | -3.877630071 | -5.521878881  |
| C101 | 6.167344962  | -6.470806160 | 5.811497997   |
| C102 | 4.672523538  | -6.202305125 | 5.779433491   |
| C103 | 2.747493769  | -5.682024515 | 4.299730346   |
| C104 | 2.066279017  | -6.721295968 | 3.404654803   |
| C105 | 1.871676340  | -7.591269119 | 1.125291960   |
| C106 | 2.780364461  | -8.049869103 | -0.010870530  |
| C107 | 4.854617759  | -7.801496565 | -1.281479672  |
| C108 | 5.860315965  | -8.901394771 | -1.003454434  |
| C109 | -0.481917795 | -7.195747778 | 7.156481048   |
| C110 | -1.744279766 | -7.410526421 | 6.310423925   |
| C111 | -0.102961696 | -5.696690166 | 7.158985634   |
| C112 | 0.900900725  | -5.379887607 | 8.281998436   |
| C113 | 1.484880504  | -3.995176537 | 8.108815733   |
| C114 | -2.699808186 | -7.746094511 | 4.081591241   |
| C115 | -2.411314878 | -8.813590189 | 3.042658752   |
| C116 | -3.251361901 | -6.417660189 | 3.504838809   |
| C117 | -2.169919468 | -5.496461268 | 2.997267604   |
| C118 | -1.614478738 | -5.654701449 | 1.715400463   |
| C119 | -1.635185335 | -4.507926326 | 3.842243546   |
| C120 | -0.529976570 | -4.867857885 | 1.309521368   |
| C121 | -0.548774088 | -3.724821984 | 3.437910680   |
| C122 | 0.015158290  | -3.910704315 | 2.172905627   |
| C123 | 9.590963085  | -1.298056352 | 5.220029378   |
| C124 | 10.601521349 | -0.288558195 | 4.651831855   |
| C125 | 8.303562746  | -0.617275037 | 5.715077619   |
| C126 | 7.199757455  | -1.536090097 | 6.144611386   |
| C127 | 7.224236780  | -2.440424580 | 7.188470196   |
| C128 | 5.181195521  | -2.349779966 | 6.337699056   |
| C129 | 11.870032879 | 1.771100350  | 4.915033273   |
| C130 | 13.193693482 | 1.105042400  | 4.607063348   |
| C131 | 1.978187583  | 2.812743894  | 6.339331957   |
| C132 | 3.235779212  | 2.904170114  | 5.516660591   |
| C133 | 4.327886301  | 1.842044005  | 5.931132864   |

|       |              |              |              |
|-------|--------------|--------------|--------------|
| C134  | 4.595994318  | 1.934320517  | 7.460027492  |
| C135  | 5.791869064  | 1.078234453  | 7.911441664  |
| C136  | 6.272978333  | 1.387995977  | 9.301302601  |
| C137  | 5.645947699  | 2.268493565  | 5.214382503  |
| C138  | 4.007576839  | -1.551243228 | 0.521422161  |
| Fe139 | 4.694874929  | -2.438733345 | 2.205126392  |
| Fe140 | 2.351513296  | -1.381580529 | -0.736605528 |
| Fe141 | 4.999652924  | -1.208456086 | -1.193442846 |
| Fe142 | 4.351164890  | -3.454621096 | -0.096253085 |
| Fe143 | 3.857393637  | -3.100002047 | -2.718734739 |
| Fe144 | 5.196982043  | -0.123473229 | 1.137245783  |
| Fe145 | 2.744971458  | -0.753648373 | 1.886136917  |
| H146  | -4.481975758 | 2.693220976  | 7.919882381  |
| H147  | -4.713653994 | 1.093634396  | 7.680355470  |
| H148  | -8.579387361 | 2.091066022  | 6.281557323  |
| H149  | -7.081639466 | 1.303344656  | 7.890825073  |
| H150  | -6.872447970 | 3.001082773  | 8.309852367  |
| H151  | -7.523681859 | 2.254816157  | 3.662992890  |
| H152  | -8.374703935 | 4.960327708  | 5.846810256  |
| H153  | -9.189328096 | 2.660814069  | 4.146102314  |
| H154  | -8.103885032 | 7.249062292  | 5.532288240  |
| H155  | -5.752206415 | 5.351686939  | 5.661209005  |
| H156  | -8.261392863 | 6.999787530  | 3.776354837  |
| H157  | -2.709443632 | 3.794998264  | 1.796658264  |
| H158  | -4.720466802 | 4.034968171  | 3.848432276  |
| H159  | -3.448994272 | 5.721490819  | 5.776939245  |
| H160  | -5.735387564 | 5.964724803  | -1.131468009 |
| H161  | -5.990880746 | 5.353166480  | 1.694862730  |
| H162  | -3.637298539 | 7.306209904  | 4.983739514  |
| H163  | -4.297981173 | 2.995773855  | 1.828779309  |
| H164  | -5.179590833 | 7.993716373  | 1.832988648  |
| H165  | -6.885657596 | 6.691045571  | 0.023092909  |
| H166  | 0.130286296  | 4.934251240  | 1.749113913  |
| H167  | 0.055118491  | 3.211944422  | 1.314994759  |
| H168  | 1.480318422  | 4.164634015  | 0.863511957  |
| H169  | -1.380499346 | 4.527332296  | -0.200821976 |
| H170  | -4.551424709 | 10.196397251 | 1.943600313  |
| H171  | -3.013570704 | 3.931531338  | -3.009633185 |
| H172  | -3.099680572 | 8.358588025  | -2.568121054 |
| H173  | -4.071987825 | 7.108578701  | -5.806504463 |
| H174  | -0.160691411 | 2.516283268  | -1.110812433 |
| H175  | 1.097172054  | 3.580580191  | -1.753028067 |
| H176  | 7.892152433  | 4.047978783  | -5.717695342 |
| H177  | -4.268749084 | 3.725563038  | -4.241661035 |
| H178  | -4.859819434 | 5.514083726  | -5.827351919 |
| H179  | -2.554083829 | 3.772462628  | -4.725958260 |
| H180  | -3.183066486 | 5.688063773  | -6.403779404 |
| H181  | -4.137586897 | 6.119073221  | -3.509090224 |
| H182  | -1.289672831 | 5.964018757  | -4.631169613 |
| H183  | -2.281480536 | 5.810822667  | -1.903053877 |
| H184  | -0.571167383 | 3.707558281  | -2.364594751 |
| H185  | 0.228310343  | -1.078569466 | -4.640472029 |
| H186  | -0.773008627 | -0.063265037 | -5.724706968 |
| H187  | 1.252577595  | 0.068716720  | -6.621918800 |
| H188  | 1.484240817  | 2.666925320  | -7.152871873 |
| H189  | 3.569349252  | 0.176449565  | -5.738569262 |
| H190  | 5.639934023  | 0.722814861  | -4.497177513 |
| H191  | 5.021636728  | 4.918041456  | -5.302281219 |
| H192  | -1.501164675 | 7.027304029  | 0.214112659  |
| H193  | -0.287369872 | 8.594571084  | 2.776845584  |
| H194  | -0.206663463 | 9.828338067  | 1.501359210  |
| H195  | -2.507501288 | 8.038891661  | 2.069261236  |



|      |               |              |               |
|------|---------------|--------------|---------------|
| H196 | -4.573034494  | 10.305973149 | 0.166589870   |
| H197 | 2.920218392   | 4.374797517  | -6.504942377  |
| H198 | 1.168362868   | 6.114886773  | -0.737473571  |
| H199 | -3.410420964  | 10.397556010 | -4.413643800  |
| H200 | -2.976132186  | 10.648971025 | -2.702044142  |
| H201 | -0.440076696  | 10.230888555 | -3.602513125  |
| H202 | 11.613230469  | 7.223275127  | 1.900334194   |
| H203 | 0.278877374   | -1.455051581 | 7.163489964   |
| H204 | 2.666729461   | 4.261782620  | 7.412339156   |
| H205 | 0.384437519   | -5.413624112 | 9.252695774   |
| H206 | 1.706837429   | -6.127949892 | 8.292865111   |
| H207 | -1.001655396  | -5.076621213 | 7.298936407   |
| H208 | -1.719884055  | -9.617225403 | 3.389704906   |
| H209 | -0.807379557  | -7.451957944 | 8.176193719   |
| H210 | -2.400780166  | -1.494275663 | 3.619082546   |
| H211 | -2.590915096  | 0.707075669  | 5.741140271   |
| H212 | -0.618515850  | -7.538615224 | 4.571124240   |
| H213 | -3.500628720  | -8.189882257 | 4.706651131   |
| H214 | 1.037400267   | -7.878047333 | 5.913598521   |
| H215 | 0.387041847   | 0.018267353  | 6.200279818   |
| H216 | 0.313607409   | -5.430921203 | 6.175447267   |
| H217 | 1.302034557   | -8.144233450 | 7.517618867   |
| H218 | -5.336674470  | -1.593617757 | 5.814883461   |
| H219 | -2.722831031  | 0.169162245  | 3.118368178   |
| H220 | 3.076129583   | -4.825142559 | 7.294109043   |
| H221 | -1.154846094  | 0.609302801  | 4.710879478   |
| H222 | -4.652564909  | 1.475009730  | -2.639550785  |
| H223 | -2.775368441  | 1.001383597  | -0.543404053  |
| H224 | -8.475313911  | 2.669793619  | -0.133915417  |
| H225 | -7.074138745  | 0.529623984  | 1.409845771   |
| H226 | -7.850611243  | 0.138737014  | -2.849683274  |
| H227 | -10.494742539 | -0.125239439 | -7.417749433  |
| H228 | -8.554910116  | 2.247194906  | -4.995426626  |
| H229 | -10.244032965 | 0.282113907  | -3.976012078  |
| H230 | -7.832851763  | -0.679216647 | -5.633336058  |
| H231 | -12.327147573 | -3.774944756 | -6.293650998  |
| H232 | -4.036227824  | -0.794363713 | -3.436142758  |
| H233 | -5.314905937  | -1.528126559 | -2.473132051  |
| H234 | -11.972709960 | -2.069148693 | -8.162231265  |
| H235 | -9.441133077  | -1.253077933 | -3.646179388  |
| H236 | -6.366785705  | 0.077732862  | -0.732597516  |
| H237 | -7.039296386  | 2.946699841  | 0.852956263   |
| H238 | -9.993612093  | -1.405460684 | 1.179035191   |
| H239 | -1.907385407  | -3.024364935 | 0.486316501   |
| H240 | -9.846759734  | -0.514495629 | 2.707119304   |
| H241 | 8.950975365   | 2.011941699  | -6.378687138  |
| H242 | 7.405836538   | 1.581046184  | -6.062924981  |
| H243 | 0.654856100   | -3.487826242 | -5.662194903  |
| H244 | -1.922260192  | -2.106103737 | -5.424004399  |
| H245 | 0.057938468   | -3.249601182 | -8.134636182  |
| H246 | -3.714550478  | -3.053863597 | -1.391128670  |
| H247 | -5.349053687  | -4.641671104 | -1.373309599  |
| H248 | -5.394292563  | -4.267120399 | -2.919524206  |
| H249 | -4.899211292  | -4.536594055 | 1.523075110   |
| H250 | -6.569063832  | -4.704997340 | 2.141926708   |
| H251 | -2.375719223  | -6.898223164 | -10.157802399 |
| H252 | -3.998324963  | -7.203156769 | -10.843975955 |
| H253 | -2.189655588  | -6.496932955 | -7.846368031  |
| H254 | -3.591096640  | -6.192603740 | -6.855242940  |
| H255 | -3.478604212  | -9.156431807 | -5.236713452  |
| H256 | -2.265198614  | -7.019634573 | -1.298234903  |
| H257 | -8.606957640  | -4.450301996 | -5.739413986  |

|      |              |              |               |
|------|--------------|--------------|---------------|
| H258 | -4.739537392 | -2.025474934 | -7.715972532  |
| H259 | -5.212381270 | -6.156840573 | -4.608426973  |
| H260 | 0.866511855  | -5.170425129 | -3.432024827  |
| H261 | 1.693680993  | -5.635003374 | -5.660978988  |
| H262 | -1.519740094 | -4.816216358 | -2.656926514  |
| H263 | -7.654116662 | -1.357049845 | 2.992787977   |
| H264 | 2.276201573  | -7.737018214 | -8.001514086  |
| H265 | -5.297362651 | -2.819409822 | 3.563584959   |
| H266 | 0.581338742  | -6.913165294 | -3.488113743  |
| H267 | -4.481631389 | -3.176753171 | -5.552025691  |
| H268 | -7.110147321 | -4.085719070 | -0.185029414  |
| H269 | 1.632564001  | -6.474483576 | -9.067736488  |
| H270 | -2.516306884 | -9.125905603 | -3.801661474  |
| H271 | -5.304318304 | -7.716470797 | -5.346132511  |
| H272 | -3.724381999 | -2.018363817 | 5.723047485   |
| H273 | -4.702969453 | 0.253792735  | 4.619452657   |
| H274 | -8.831091391 | -3.398512073 | -7.969340748  |
| H275 | -5.428872237 | -2.253287319 | 0.683744390   |
| H276 | -1.083780195 | -6.632669624 | -5.311415135  |
| H277 | -1.531723121 | -7.866993206 | -2.651553583  |
| H278 | -0.431434430 | -5.677937726 | -1.582579869  |
| H279 | -3.814200375 | -5.897529732 | -2.815492988  |
| H280 | -1.202871472 | -1.382307183 | -9.940883859  |
| H281 | -2.435405370 | -4.363285414 | -9.106467084  |
| H282 | -2.929978824 | -5.232583888 | -11.858725539 |
| H283 | 0.120384857  | -2.520509093 | -10.276634748 |
| H284 | -4.636455587 | -3.159315636 | -9.795616093  |
| H285 | 6.482248726  | -6.956593894 | 4.876185638   |
| H286 | 6.650521811  | -5.472209268 | 5.831553284   |
| H287 | 9.339929243  | -1.960063508 | 4.378475125   |
| H288 | 7.517221681  | -7.292097443 | 7.101105354   |
| H289 | 6.077315492  | -6.926179143 | 7.791582498   |
| H290 | 4.802399227  | -2.481418355 | -5.688490827  |
| H291 | 3.790444594  | -2.121561847 | -8.581167093  |
| H292 | 3.825877414  | -6.226401023 | -7.146429543  |
| H293 | 3.086991483  | -2.288788042 | -6.146492031  |
| H294 | 4.929542122  | -3.125454059 | -9.184295770  |
| H295 | 5.398399307  | -6.896662270 | -1.595165217  |
| H296 | 5.050286210  | -4.385604980 | -7.209671065  |
| H297 | 5.707543941  | 7.490320791  | 2.840714153   |
| H298 | 8.034764935  | 5.969951684  | 4.132818814   |
| H299 | 4.289251528  | -6.690463383 | 0.442793307   |
| H300 | 4.264091597  | 3.368324536  | -2.594868075  |
| H301 | 1.547872898  | -8.490814743 | 1.665216401   |
| H302 | -0.131259276 | -2.971538717 | 4.109489109   |
| H303 | 0.969484345  | -7.174869688 | 0.647795135   |
| H304 | 4.182538591  | 5.757067007  | 1.406946014   |
| H305 | 2.992589103  | -5.857797605 | 1.802527826   |
| H306 | 4.598375609  | 4.421356823  | 2.468014802   |
| H307 | 5.610004602  | 6.069749976  | 3.904984983   |
| H308 | 7.020546666  | 4.806918866  | 2.096207850   |
| H309 | 6.671392763  | 6.176363072  | 1.020986243   |
| H310 | -3.819528644 | -5.922004787 | 4.304745969   |
| H311 | 6.877224335  | 8.668735737  | 4.751336143   |
| H312 | 6.643998309  | 8.249522979  | 7.779160507   |
| H313 | 0.870139768  | -3.312016036 | 1.849263448   |
| H314 | 7.606314728  | 10.555840720 | 6.271378695   |
| H315 | 6.197821377  | 10.353761684 | 7.083034665   |
| H316 | 5.394381101  | 3.130329630  | 0.671873023   |
| H317 | -0.077886278 | -4.991538277 | 0.322678041   |
| H318 | -2.069805349 | -4.348864396 | 4.832092965   |
| H319 | 9.630297353  | 3.141135975  | 7.409843781   |

|       |              |              |               |
|-------|--------------|--------------|---------------|
| H320  | 8.558894932  | 0.033042172  | 6.571245836   |
| H321  | 7.943530549  | 3.651697821  | 5.710963073   |
| H322  | 9.237679515  | 2.308530693  | 8.644463579   |
| H323  | 5.805775712  | -9.357125385 | 0.015179118   |
| H324  | 7.218365098  | 2.106626799  | 3.059202574   |
| H325  | 3.675330237  | 3.910572063  | 5.580380158   |
| H326  | 4.764047899  | -5.959955575 | 3.745135805   |
| H327  | 4.793115364  | 2.988751329  | 7.710430678   |
| H328  | 5.614231644  | -3.615819041 | 7.976066153   |
| H329  | 4.125002967  | -2.551654606 | 6.209372424   |
| H330  | 8.293298854  | 8.881717434  | 7.754923181   |
| H331  | 5.085560352  | 2.362689603  | -1.400014882  |
| H332  | 9.197116661  | 3.509953043  | 2.834242996   |
| H333  | 7.765605373  | 1.727635296  | 1.659790400   |
| H334  | 9.692573680  | 5.860688397  | 2.724485353   |
| H335  | 3.989469485  | 6.224179471  | -0.516622350  |
| H336  | 5.709175734  | 1.463163521  | 11.105021457  |
| H337  | 5.508994124  | 0.016309481  | 7.868838542   |
| H338  | 6.649803991  | 1.226098058  | 7.247280679   |
| H339  | 3.691341356  | 1.616950787  | 7.998724301   |
| H340  | 2.713551333  | -4.682195315 | 3.839302266   |
| H341  | -2.023938306 | -6.417484365 | 1.048239963   |
| H342  | -3.957167502 | -6.685526296 | 2.703361179   |
| H343  | 2.977032871  | 2.685654203  | 4.471538588   |
| H344  | 9.592357596  | 4.052452869  | 4.230536057   |
| H345  | 8.739586302  | 4.927859692  | 6.121832955   |
| H346  | 3.733852937  | 5.586884899  | -2.088285782  |
| H347  | 8.028613397  | -2.753784285 | 7.843284114   |
| H348  | 7.923227266  | 0.042817522  | 4.926431255   |
| H349  | 2.220766135  | -5.659498599 | 5.256324192   |
| H350  | 4.229256915  | -8.122318191 | -2.129511186  |
| H351  | 6.702263732  | 4.150422377  | -3.585819835  |
| H352  | 6.950717028  | 2.413998271  | -3.301157779  |
| H353  | 11.004588292 | -2.638108584 | 5.865476420   |
| H354  | 10.599795211 | -1.534483420 | 7.003489248   |
| H355  | 12.053307038 | 2.495111721  | 5.724593576   |
| H356  | 10.381795516 | 1.046459596  | 6.255302942   |
| H357  | 13.382243423 | 0.156786426  | 5.167644086   |
| H358  | 11.519526476 | 2.335860063  | 4.036991624   |
| H359  | 9.682966647  | 2.683835587  | -3.614681719  |
| H360  | -6.053019572 | -2.183095309 | -12.481891299 |
| H361  | 10.429242032 | 8.458839700  | 1.395208225   |
| H362  | 9.562385306  | 6.372061596  | -0.218181624  |
| H363  | -7.337665240 | -3.974498475 | -10.403454691 |
| H364  | -6.226960538 | -1.231762864 | -9.548381250  |
| H365  | -7.939388253 | -1.687648975 | -9.582751629  |
| H366  | -7.212957791 | -4.891704362 | -4.006229920  |
| H367  | 0.622240523  | 1.260827258  | 2.184173500   |
| H368  | 1.720416163  | -1.574690313 | 0.770231450   |
| H369  | -1.305221541 | -0.563098326 | 0.906835131   |
| M0370 | 4.750348493  | -0.284015473 | 3.836306138   |
| N371  | 2.262672526  | 1.584638058  | -0.626217885  |
| N372  | 2.300281480  | 0.462360815  | -0.618203879  |
| N373  | -5.093407936 | 1.910078097  | 8.164998548   |
| N374  | -7.850906665 | 2.540911586  | 5.732325493   |
| N375  | -8.034305970 | 5.254597391  | 4.934966302   |
| N376  | -5.388966605 | 6.164971913  | 5.166429395   |
| N377  | -4.085844357 | 4.528275830  | 3.218203580   |
| N378  | -5.381284792 | 5.547215674  | 0.896866093   |
| N379  | -4.791809216 | 8.379378803  | 0.967713368   |
| N380  | -1.999013546 | 8.778818675  | 1.574404556   |
| N381  | -0.489317037 | 6.983882554  | 0.109848690   |

|      |               |              |               |
|------|---------------|--------------|---------------|
| N382 | -1.610702835  | 6.175619536  | -2.581787366  |
| N383 | -2.587363993  | 8.729047059  | -3.371025305  |
| N384 | 6.861711903   | 9.883033168  | 6.466496849   |
| N385 | 7.367222418   | 7.777766766  | 4.889668442   |
| N386 | 5.003208802   | 4.055660085  | 0.474595947   |
| N387 | 3.913460389   | 5.402518650  | -1.106364859  |
| N388 | 4.677552123   | 3.281327637  | -1.671598866  |
| N389 | 9.590742751   | 6.837389352  | 2.374329247   |
| N390 | -4.580114390  | -1.827249544 | 5.168122457   |
| N391 | -0.157131860  | -0.782802655 | 6.525313612   |
| N392 | -5.515595200  | -2.215796393 | 2.752734050   |
| N393 | -8.108148333  | -1.491227596 | 2.092281322   |
| N394 | -7.832233118  | 0.991236919  | 0.893166384   |
| N395 | -6.195443652  | 0.840546572  | -1.383338954  |
| N396 | -3.304751045  | -2.199868314 | -0.958475420  |
| N397 | -2.087799964  | -0.881311257 | 0.258165143   |
| N398 | -7.452507183  | 0.247427134  | -3.779426894  |
| N399 | -11.085981621 | -2.461492838 | -5.118625873  |
| N400 | -11.580728869 | -1.983198857 | -7.227996879  |
| N401 | 8.268651222   | 1.912683820  | -5.623236866  |
| N402 | 4.618774663   | -2.667689649 | -8.322329120  |
| N403 | 3.035705246   | -5.832521360 | -7.651027088  |
| N404 | 0.789026923   | -6.039674271 | -5.956815679  |
| N405 | -3.248749674  | -6.719975197 | -3.096927944  |
| N406 | -3.112265994  | -8.626824236 | -4.452245695  |
| N407 | -4.739742727  | -7.030236151 | -4.852169493  |
| N408 | -0.364733226  | -3.437676573 | -5.722078794  |
| N409 | -0.802762353  | -2.775290655 | -8.425738967  |
| N410 | -2.597369930  | -4.188795476 | -10.099822956 |
| N411 | -3.195347604  | -6.295414323 | -7.789292356  |
| N412 | -5.275126759  | -3.586089202 | -10.462048047 |
| N413 | 6.506271524   | -7.326985271 | 6.952276105   |
| N414 | 4.136309503   | -6.042787460 | 4.554574850   |
| N415 | 2.410031594   | -6.660475565 | 2.100376482   |
| N416 | 4.006659964   | -7.481326370 | -0.146744742  |
| N417 | 0.579860684   | -8.143020523 | 6.794514886   |
| N418 | -1.560271261  | -7.598363263 | 4.972663984   |
| N419 | 10.209871059  | -2.133670765 | 6.268837323   |
| N420 | 5.908674515   | -1.498871602 | 5.618996066   |
| N421 | 5.944115231   | -2.940827684 | 7.291603841   |
| N422 | 10.881658041  | 0.819877600  | 5.395128271   |
| N423 | -0.274391072  | -1.484520413 | -2.102715980  |
| N424 | 0.696211594   | -1.444873066 | -1.526781514  |
| O425 | -5.637866468  | 3.058954065  | 5.573447922   |
| O426 | -7.461797539  | 4.616506170  | 2.822790519   |
| O427 | -5.887400982  | 7.873650503  | 3.730133191   |
| O428 | -2.637228105  | 6.258332538  | 2.923652840   |
| O429 | -3.517368215  | 4.982771666  | -0.277330012  |
| O430 | -4.679845368  | 8.239609062  | -1.309998670  |
| O431 | -2.134043804  | 10.802326370 | 0.497349666   |
| O432 | 1.488542371   | 7.880896073  | 0.866534709   |
| O433 | 0.558524201   | 6.686717070  | -3.061516604  |
| O434 | -1.563772712  | 8.336952653  | -5.360813107  |
| O435 | -1.223478707  | 11.750903218 | -4.717083122  |
| O436 | 8.462496323   | 6.604539015  | 6.558261925   |
| O437 | 8.300508243   | 8.740789988  | 2.367996630   |
| O438 | 11.502564834  | 6.797135822  | -0.676368737  |
| O439 | -5.242112488  | -0.040364759 | 2.072836233   |
| O440 | -2.037476085  | -2.055023358 | 6.412018209   |
| O441 | -7.945593820  | -2.486068121 | 0.042523623   |
| O442 | -6.346897749  | -4.668682794 | 0.064977574   |
| O443 | -10.088689469 | 1.086844300  | 0.463735464   |

|                    |                                  |              |               |              |              |
|--------------------|----------------------------------|--------------|---------------|--------------|--------------|
| O444               | -6.415463379                     | 3.083563046  | -1.759157274  |              |              |
| O445               | -5.588685220                     | 0.850501132  | -4.959432438  |              |              |
| O446               | -8.639993789                     | 1.473124655  | -6.880760421  |              |              |
| O447               | 9.630215727                      | 4.700487461  | -3.938749765  |              |              |
| O448               | 1.962364273                      | 1.870961297  | -6.855666125  |              |              |
| O449               | 1.997207459                      | -3.932639113 | -8.355933684  |              |              |
| O450               | -0.399205624                     | -7.039408232 | -7.649779440  |              |              |
| O451               | -2.352966036                     | -4.483868262 | -5.292452356  |              |              |
| O452               | -2.379761651                     | -1.241133943 | -7.786713649  |              |              |
| O453               | 0.957691766                      | -0.864900466 | -6.598355586  |              |              |
| O454               | -1.851053836                     | -3.051731140 | -11.941332007 |              |              |
| O455               | -5.544752780                     | -5.256997035 | -11.990666367 |              |              |
| O456               | -5.287905626                     | -6.533859715 | -8.675436058  |              |              |
| O457               | -8.080744818                     | -2.364395443 | -12.332870015 |              |              |
| O458               | -6.352013710                     | -4.524614780 | -4.286289177  |              |              |
| O459               | 4.021219134                      | -6.109201396 | 6.851547044   |              |              |
| O460               | 1.273717908                      | -7.569855995 | 3.869630479   |              |              |
| O461               | 2.347788639                      | -8.920147277 | -0.784735972  |              |              |
| O462               | 6.679136492                      | -9.275015778 | -1.827267044  |              |              |
| O463               | -2.874464620                     | -7.388293568 | 6.826121648   |              |              |
| O464               | 0.894671429                      | -2.967801121 | 8.430481860   |              |              |
| O465               | 2.698146847                      | -3.919647395 | 7.528791649   |              |              |
| O466               | -2.914141187                     | -8.850343650 | 1.928532862   |              |              |
| O467               | 11.214152549                     | -0.508232333 | 3.590193746   |              |              |
| O468               | 14.037562969                     | 1.585491442  | 3.864458483   |              |              |
| O469               | 1.062257874                      | 2.023817792  | 6.165220853   |              |              |
| O470               | 1.874852588                      | 3.691191286  | 7.390237775   |              |              |
| O471               | 7.412574636                      | 1.732872891  | 9.604453106   |              |              |
| O472               | 5.302539058                      | 1.240033020  | 10.240455889  |              |              |
| O473               | 6.114033880                      | 1.410447389  | 4.366956327   |              |              |
| O474               | 6.201696933                      | 3.353111027  | 5.501696084   |              |              |
| O475               | 3.921169604                      | 0.573303058  | 5.552511019   |              |              |
| O476               | 9.837133493                      | 4.127258438  | 3.270783618   |              |              |
| O477               | 7.750165320                      | 2.462987568  | 2.302400238   |              |              |
| O478               | -4.782337276                     | -4.480569866 | -2.176531849  |              |              |
| O479               | 10.025881258                     | 2.623254806  | 8.156209543   |              |              |
| O480               | 8.868758824                      | 3.968501005  | 5.896683437   |              |              |
| S481               | 3.401307593                      | -4.221688179 | -4.688534103  |              |              |
| S482               | 2.307482222                      | -3.783650867 | -1.063119973  |              |              |
| S483               | 3.111786602                      | -2.029051883 | 3.734251875   |              |              |
| S484               | 3.465539598                      | -0.906131217 | -2.784438048  |              |              |
| S485               | 0.471406763                      | -0.078666420 | 2.358540304   |              |              |
| S486               | 5.012811948                      | -4.597055003 | 1.693895415   |              |              |
| S487               | 3.796356617                      | 1.231900922  | 2.272696039   |              |              |
| S488               | 5.926836435                      | -3.189553742 | -1.724282106  |              |              |
| S489               | 6.539890232                      | -1.205169203 | 2.554002766   |              |              |
| S490               | 6.234309470                      | 0.587320076  | -0.678092492  |              |              |
| <b>15, 47(3/2)</b> | <b>bm1unh2b2n2x266n2ne.car_1</b> |              |               |              |              |
| Fe1                | 2.71                             | C1           | -6.274630110  | -7.024061105 | 0.152133737  |
| Fe2                | -0.92                            | C2           | -6.040189776  | -8.219941511 | -0.776732305 |
| Fe3                | 2.89                             | C3           | -7.901018258  | -5.383046989 | 0.990898250  |
| Fe4                | -2.11                            | C4           | -7.672966475  | -5.525909196 | 2.494226800  |
| Fe5                | 2.62                             | C5           | -7.568484187  | -6.999322818 | 4.437523020  |
| Fe6                | 0.03                             | C6           | -6.089481839  | -6.856516379 | 4.820733273  |
| Fe7                | -1.73                            | C7           | -3.766534775  | -6.979954368 | 4.046830632  |
|                    |                                  | C8           | -3.368067774  | -5.501027674 | 4.014964218  |
|                    |                                  | C9           | -3.711321571  | -3.305232475 | 3.011729879  |
|                    |                                  | C10          | -4.207257678  | -2.558219369 | 4.258966641  |
|                    |                                  | C11          | -5.896269674  | -2.324673203 | 5.980421288  |
|                    |                                  | C12          | -5.123417222  | -2.682629744 | 7.256996402  |
|                    |                                  | C13          | -4.252007121  | -4.472901130 | 8.678843150  |

|     |               |              |              |
|-----|---------------|--------------|--------------|
| C14 | -2.724000153  | -4.425189922 | 8.812425635  |
| C15 | -0.556050225  | -4.698336149 | 7.681944334  |
| C16 | 0.221947461   | -3.517307511 | 7.090999070  |
| C17 | 0.010335545   | -1.354317053 | 5.871987986  |
| C18 | -0.424099504  | -0.095069142 | 6.642265964  |
| C19 | -0.341750417  | -1.322913594 | 4.369684762  |
| C20 | -0.069621855  | 0.058401457  | 3.773818851  |
| C21 | 0.413475431   | -2.433017221 | 3.633912477  |
| C22 | -2.259384161  | 1.402844915  | 7.292424789  |
| C23 | -2.302610520  | 1.208604480  | 8.818435066  |
| C24 | -3.621270597  | 1.843840180  | 6.703190096  |
| C25 | -4.195978369  | 3.035145355  | 7.480150529  |
| C26 | -3.484655324  | 2.192256407  | 5.215882962  |
| C27 | -2.949644869  | -0.196777699 | 10.686906323 |
| C28 | -1.628061326  | -0.019085178 | 11.406050135 |
| C29 | 7.639949780   | -9.358878332 | 5.814421945  |
| C30 | 7.999714512   | -8.038119063 | 5.140159576  |
| C31 | 7.667173420   | -5.566123716 | 5.341948260  |
| C32 | 8.568636361   | -4.842217607 | 6.359135961  |
| C33 | 6.281629969   | -4.907546523 | 5.221115821  |
| C34 | 6.330408101   | -3.433069697 | 4.814728722  |
| C35 | 4.960778662   | -2.945939746 | 4.336905660  |
| C36 | 4.356956838   | -0.515509109 | 4.422935052  |
| C37 | 10.575078159  | -3.468832468 | 6.649126641  |
| C38 | 10.496106966  | -1.961240137 | 6.542598063  |
| C39 | -4.113570077  | -3.869855948 | -2.219474550 |
| C40 | -4.920307885  | -2.582202475 | -1.965247425 |
| C41 | -2.629551137  | -3.603636810 | -1.914943029 |
| C42 | -1.738917458  | -4.855417684 | -1.769454141 |
| C43 | -1.118478855  | -5.385677499 | -3.059509265 |
| C44 | -5.882860062  | -0.603404729 | -3.108865158 |
| C45 | -7.280222941  | -0.513474199 | -2.493470460 |
| C46 | -5.796682472  | -0.044250894 | -4.555980815 |
| C47 | -9.187900071  | -1.761649709 | -1.596954524 |
| C48 | -9.031913880  | -1.484523510 | -0.095025954 |
| C49 | -7.514187342  | -1.245599453 | 1.816355658  |
| C50 | -6.719191049  | 0.018318252  | 2.145906864  |
| C51 | -5.505060200  | 1.997248935  | 1.354444533  |
| C52 | -6.384375382  | 3.168259331  | 1.837696786  |
| C53 | -4.783627540  | 2.484643290  | 0.086346147  |
| C54 | -3.772296693  | 1.560079736  | -0.526894596 |
| C55 | -2.910632283  | 0.638137493  | 0.035275326  |
| C56 | -2.566767624  | 0.738488651  | -2.138703294 |
| C57 | -8.554319112  | 4.296430966  | 1.532121824  |
| C58 | -8.805071890  | 4.537477536  | 3.018010780  |
| C59 | -9.874456665  | 3.970271371  | 0.793784212  |
| C60 | -10.735951581 | 5.145558259  | 0.433327434  |
| C61 | -11.059456899 | 6.280631730  | 1.151242568  |
| C62 | -12.057784035 | 6.306601339  | -0.826597053 |
| C63 | 7.729980181   | 3.894224070  | 4.969133286  |
| C64 | 8.960358477   | 3.010377009  | 5.045977865  |
| C65 | 6.548922765   | 2.979581023  | 4.548618341  |
| C66 | 5.237358074   | 3.721200929  | 4.447572231  |
| C67 | 4.407062252   | 3.896170546  | 5.571056118  |
| C68 | 4.804935632   | 4.254032150  | 3.220611794  |
| C69 | 3.188331864   | 4.576922415  | 5.475079395  |
| C70 | 3.598609184   | 4.945700165  | 3.111165622  |
| C71 | 2.788355795   | 5.104573220  | 4.240703775  |
| C72 | 3.913677477   | 8.348080778  | -0.855994705 |
| C73 | 2.656181144   | 8.990008632  | -1.456283701 |
| C74 | 3.713258918   | 6.830036269  | -0.722712225 |
| C75 | 1.599836040   | 9.921892974  | -3.464793652 |

|      |              |              |              |
|------|--------------|--------------|--------------|
| C76  | 0.374542492  | 9.031736901  | -3.679842268 |
| C77  | -0.560662212 | 6.755577370  | -3.750760751 |
| C78  | -1.346396180 | 6.541290836  | -2.441047903 |
| C79  | -0.027335979 | 5.435908333  | -4.338693455 |
| C80  | -1.030873989 | 4.300707814  | -4.575511741 |
| C81  | -2.045042768 | 4.478595017  | -5.721306154 |
| C82  | -3.831655303 | 6.219209702  | -5.680558636 |
| C83  | -1.314117279 | 6.369075400  | 0.002264142  |
| C84  | -1.823652219 | 7.674453622  | 0.643464035  |
| C85  | -0.441596180 | 5.621754365  | 1.013505046  |
| C86  | -1.365707574 | 10.040333651 | 1.064615395  |
| C87  | -2.300220254 | 11.127097238 | 0.537597634  |
| C88  | -3.891749578 | 11.828473959 | -1.206172143 |
| C89  | -5.356386766 | 11.886182600 | -0.720348101 |
| C90  | -3.834312262 | 11.686522533 | -2.744673644 |
| C91  | -4.430421200 | 10.363557959 | -3.214574700 |
| C92  | -7.155516316 | 10.713725379 | 0.483670193  |
| C93  | -7.514288505 | 11.767673658 | 1.525096114  |
| C94  | -7.382243837 | 9.288973887  | 1.061424307  |
| C95  | -7.160623368 | 8.196653152  | 0.036943566  |
| C96  | -8.195031394 | 7.817390319  | -0.834423019 |
| C97  | -5.918313369 | 7.552331666  | -0.093918592 |
| C98  | -8.000295596 | 6.836748246  | -1.809504561 |
| C99  | -5.697897397 | 6.585540795  | -1.079076684 |
| C100 | -6.745869247 | 6.235649618  | -1.931221339 |
| C101 | 6.474050622  | -2.984044281 | -7.903375191 |
| C102 | 4.981992962  | -3.117873535 | -7.645257197 |
| C103 | 3.004660816  | -1.993882243 | -6.637176000 |
| C104 | 2.290913244  | -0.835640190 | -7.340699630 |
| C105 | 2.020830741  | 1.595444269  | -7.436857522 |
| C106 | 2.891539868  | 2.844566892  | -7.507873750 |
| C107 | 4.925183529  | 4.029089333  | -6.855318052 |
| C108 | 5.936697794  | 4.174419412  | -7.973330602 |
| C109 | -0.103643551 | -4.272995625 | -9.191428595 |
| C110 | -1.404621148 | -3.459786932 | -9.139985571 |
| C111 | 0.246808298  | -4.789361149 | -7.776736404 |
| C112 | 1.294277616  | -5.917980030 | -7.840369218 |
| C113 | 1.862058391  | -6.199200644 | -6.467465954 |
| C114 | -2.460634916 | -1.286899484 | -8.729681945 |
| C115 | -2.200195025 | 0.059803054  | -9.376434627 |
| C116 | -3.035866871 | -1.218946013 | -7.293397740 |
| C117 | -1.974794780 | -1.031326477 | -6.238466700 |
| C118 | -1.453494052 | 0.239926214  | -5.939553346 |
| C119 | -1.429734177 | -2.149599836 | -5.583506690 |
| C120 | -0.406592509 | 0.379510176  | -5.022303885 |
| C121 | -0.376619345 | -2.009562217 | -4.673625671 |
| C122 | 0.146428260  | -0.743127528 | -4.397234100 |
| C123 | 9.785706017  | -4.115335049 | -2.842987224 |
| C124 | 10.762870172 | -3.879350854 | -1.677977492 |
| C125 | 8.500023361  | -4.818971510 | -2.378554017 |
| C126 | 7.402284359  | -4.914365737 | -3.395118228 |
| C127 | 7.423938054  | -5.559058645 | -4.616577352 |
| C128 | 5.375189996  | -4.818096842 | -4.209059798 |
| C129 | 12.020704671 | -4.753333136 | 0.207141318  |
| C130 | 13.319433597 | -4.120582637 | -0.243019869 |
| C131 | 2.250203713  | -6.838500702 | 0.517865183  |
| C132 | 3.466375192  | -6.069276788 | 0.961002503  |
| C133 | 4.613300902  | -6.044483951 | -0.122790880 |
| C134 | 4.962805670  | -7.497052398 | -0.550172633 |
| C135 | 6.178520084  | -7.557217064 | -1.487063505 |
| C136 | 6.708344246  | -8.945259773 | -1.711862369 |
| C137 | 5.870415037  | -5.452485118 | 0.590666243  |

|       |              |              |              |
|-------|--------------|--------------|--------------|
| C138  | 4.031107953  | 0.268765826  | -1.554921972 |
| Fe139 | 4.796498766  | -1.033555865 | -2.877911345 |
| Fe140 | 2.417152986  | 1.594440849  | -1.670031262 |
| Fe141 | 4.926838720  | 1.781260018  | -0.548607710 |
| Fe142 | 4.555690536  | 1.460139027  | -3.079846174 |
| Fe143 | 3.802524821  | 3.802126612  | -2.116734171 |
| Fe144 | 5.126674506  | -0.780561154 | -0.376211922 |
| Fe145 | 2.608807407  | -0.971714440 | -0.845860218 |
| H146  | -4.089431024 | -8.503526701 | -0.261934627 |
| H147  | -4.279500245 | -7.749458888 | -1.698069025 |
| H148  | -8.239298042 | -6.926497806 | -0.447799770 |
| H149  | -6.623393080 | -8.085858310 | -1.700875302 |
| H150  | -6.474899054 | -9.098601000 | -0.268306260 |
| H151  | -7.309647100 | -4.513981644 | 0.669354469  |
| H152  | -8.112128648 | -7.533508951 | 2.423377525  |
| H153  | -8.962206440 | -5.155113884 | 0.821048106  |
| H154  | -7.899662016 | -8.015282146 | 4.689446980  |
| H155  | -5.529016959 | -7.358906297 | 2.913226232  |
| H156  | -8.127084829 | -6.287283849 | 5.059214359  |
| H157  | -2.634926021 | -3.106324229 | 2.930546635  |
| H158  | -4.555359409 | -5.176326319 | 2.355390096  |
| H159  | -3.229812026 | -7.518506710 | 3.254186422  |
| H160  | -5.847291356 | -1.234571901 | 5.863445630  |
| H161  | -5.958723159 | -3.665445390 | 4.295510206  |
| H162  | -3.446081601 | -7.380098952 | 5.016095116  |
| H163  | -4.200519980 | -2.901454786 | 2.113805420  |
| H164  | -5.154026143 | -4.689902112 | 6.753618362  |
| H165  | -6.947477275 | -2.617876299 | 6.112752276  |
| H166  | 0.235167868  | -3.416165793 | 4.094750315  |
| H167  | 0.087962073  | -2.493486952 | 2.585301462  |
| H168  | 1.498283962  | -2.242543539 | 3.631388622  |
| H169  | -1.420756177 | -1.522346741 | 4.284101009  |
| H170  | -4.559648571 | -5.519520493 | 8.821861213  |
| H171  | -3.146766901 | 1.337703919  | 4.613182679  |
| H172  | -3.314524442 | -0.601162509 | 8.627836502  |
| H173  | -4.380672805 | 2.793254321  | 8.536795541  |
| H174  | -0.277894431 | 0.058957013  | 2.695447339  |
| H175  | 0.982889765  | 0.349090992  | 3.900143763  |
| H176  | 7.522707002  | 4.272142341  | 5.988649665  |
| H177  | -4.454122912 | 2.516084851  | 4.811110712  |
| H178  | -5.148570833 | 3.348941385  | 7.028441993  |
| H179  | -2.767351844 | 3.018405351  | 5.080095836  |
| H180  | -3.506350377 | 3.893695083  | 7.445670589  |
| H181  | -4.323400319 | 0.996088212  | 6.804482065  |
| H182  | -1.529041345 | 2.211288462  | 7.136113486  |
| H183  | -2.395529487 | -0.350966067 | 6.050975644  |
| H184  | -0.697395652 | 0.833035976  | 4.237320875  |
| H185  | -0.106625573 | 4.673762152  | 0.557936884  |
| H186  | -1.073067350 | 5.391057251  | 1.886187086  |
| H187  | 0.960021951  | 6.168390546  | 2.273890264  |
| H188  | 1.095274588  | 5.779704994  | 4.909844890  |
| H189  | 3.268061147  | 5.330716482  | 2.145652317  |
| H190  | 5.406501749  | 4.097936712  | 2.322899501  |
| H191  | 4.711174226  | 3.481782656  | 6.536507974  |
| H192  | -1.539841586 | -2.694197992 | 6.494956096  |
| H193  | -0.245247616 | -5.596078796 | 7.127164532  |
| H194  | -0.230284947 | -4.815105178 | 8.724131196  |
| H195  | -2.482970168 | -4.813590809 | 6.786524376  |
| H196  | -4.648850395 | -3.880728770 | 9.513855917  |
| H197  | 2.544545435  | 4.685331113  | 6.352339723  |
| H198  | 1.099345383  | -1.410616938 | 5.996508661  |
| H199  | -3.707385782 | 0.441282762  | 11.171289750 |



|      |               |              |               |
|------|---------------|--------------|---------------|
| H200 | -3.252507720  | -1.247266816 | 10.828206821  |
| H201 | -0.722040185  | -0.204470062 | 10.783888043  |
| H202 | 11.602436148  | -3.793686549 | 6.425103943   |
| H203 | 0.601195062   | -6.231799090 | -3.783364640  |
| H204 | 2.941536627   | -8.350878048 | 1.499519026   |
| H205 | 0.818133676   | -6.837566669 | -8.209950168  |
| H206 | 2.103742055   | -5.643554683 | -8.533182718  |
| H207 | -0.658036233  | -5.166151060 | -7.275974115  |
| H208 | -1.531258775  | 0.011572311  | -10.268525541 |
| H209 | -0.377754514  | -5.147475745 | -9.801755603  |
| H210 | -2.218456557  | -2.935337121 | -2.686339241  |
| H211 | -2.319323702  | -5.683281510 | -1.323427394  |
| H212 | -0.365765627  | -1.740674617 | -8.637317552  |
| H213 | -3.232776720  | -1.753437315 | -9.373505380  |
| H214 | 1.379480226   | -2.827168872 | -9.329976553  |
| H215 | 0.659614495   | -5.811320461 | -2.072205461  |
| H216 | 0.612694470   | -3.945346809 | -7.171502333  |
| H217 | 1.705468122   | -4.215216386 | -10.156923508 |
| H218 | -5.077153304  | -5.027555525 | -3.633433428  |
| H219 | -2.581309710  | -3.051173744 | -0.966249158  |
| H220 | 3.398876454   | -5.049726652 | -6.927380881  |
| H221 | -0.930820724  | -4.620073262 | -1.061730356  |
| H222 | -4.787455198  | 1.802255082  | 2.164202991   |
| H223 | -2.774830973  | 0.300975003  | 1.058556843   |
| H224 | -8.487420361  | -1.146356567 | 2.316727076   |
| H225 | -6.966624718  | -1.764239118 | -0.183770015  |
| H226 | -7.975276064  | 2.352433435  | 0.835020498   |
| H227 | -10.754963899 | 6.638718570  | 2.127527337   |
| H228 | -8.820818251  | 3.603644337  | 3.629880314   |
| H229 | -10.443185516 | 3.227758968  | 1.381516616   |
| H230 | -8.095035295  | 5.201982132  | 1.103656317   |
| H231 | -12.676195834 | 6.660052110  | -1.648500085  |
| H232 | -4.302380552  | 3.441345034  | 0.348612899   |
| H233 | -5.541006046  | 2.715419811  | -0.679751544  |
| H234 | -12.307831930 | 7.911917939  | 0.548911251   |
| H235 | -9.605716006  | 3.476525503  | -0.153071326  |
| H236 | -6.427179570  | 0.470579311  | 0.148141341   |
| H237 | -6.997396115  | -2.091943899 | 2.292786411   |
| H238 | -9.937178104  | -1.046420461 | -1.963092612  |
| H239 | -2.120955921  | 0.535999908  | -3.108188410  |
| H240 | -9.610579233  | -2.769511806 | -1.712803517  |
| H241 | 8.580995306   | 5.653989110  | 4.351241058   |
| H242 | 7.075604305   | 5.410512223  | 3.757889724   |
| H243 | 0.379375190   | 6.622673683  | -1.299353138  |
| H244 | -2.206244511  | 5.757242777  | -0.189287047  |
| H245 | -0.342614081  | 8.764366869  | -0.276034562  |
| H246 | -4.339751294  | 2.752237029  | -2.981704299  |
| H247 | -5.753908975  | 1.931355802  | -4.270372003  |
| H248 | -5.454781221  | 3.899810871  | -3.084812658  |
| H249 | -4.730534738  | -0.101568458 | -4.844499835  |
| H250 | -6.360923390  | -0.709167812 | -5.229776933  |
| H251 | -2.786936921  | 11.797961652 | -3.062256922  |
| H252 | -4.425165366  | 12.504273082 | -3.176713804  |
| H253 | -2.533992548  | 9.482412042  | -3.459484732  |
| H254 | -3.913571177  | 8.422701668  | -3.595083923  |
| H255 | -3.689114192  | 7.845536839  | -6.910619990  |
| H256 | -2.263782151  | 3.498983035  | -6.171328032  |
| H257 | -8.823711757  | 6.537190244  | -2.463179391  |
| H258 | -5.098964248  | 7.780661099  | 0.595016454   |
| H259 | -5.395059595  | 6.170591616  | -4.338527163  |
| H260 | 0.762568086   | 5.053927872  | -3.672507291  |
| H261 | 1.473608709   | 7.310795472  | -3.331422854  |

|      |              |              |              |
|------|--------------|--------------|--------------|
| H262 | -1.562190706 | 4.036283765  | -3.648812233 |
| H263 | -7.519893176 | -2.536643975 | -2.698423905 |
| H264 | 1.940728864  | 10.270556559 | -4.449062857 |
| H265 | -5.031931125 | -2.445574303 | -3.950908074 |
| H266 | 0.468112584  | 5.685989729  | -5.291609788 |
| H267 | -4.714831529 | 6.126522100  | -1.199340449 |
| H268 | 1.241983160  | 10.796384116 | -2.903550035 |
| H269 | -2.636409368 | 6.549636063  | -7.322338161 |
| H270 | -5.500825523 | 7.388975369  | -5.559381615 |
| H271 | -3.452833261 | -4.797138203 | -3.933562908 |
| H272 | -4.482127013 | -4.586590473 | -1.459109886 |
| H273 | -9.178916302 | 8.285284075  | -0.743833676 |
| H274 | -5.260699163 | 0.041412572  | -2.470206066 |
| H275 | -1.284060314 | 7.215349685  | -4.438110954 |
| H276 | -1.602041303 | 5.089284312  | -6.518367086 |
| H277 | -0.422789913 | 3.421561826  | -4.831500868 |
| H278 | -3.882392898 | 4.475619599  | -4.627984740 |
| H279 | -1.746977627 | 9.758845411  | 2.057539530  |
| H280 | -2.885617934 | 9.932938044  | -1.027690325 |
| H281 | -3.462970272 | 12.804758638 | -0.936014374 |
| H282 | -0.381109425 | 10.508413533 | 1.201547530  |
| H283 | -5.101932025 | 10.121355621 | 0.270486115  |
| H284 | 6.736696102  | -1.925367690 | -8.047672510 |
| H285 | 6.970094347  | -3.312960669 | -6.966554044 |
| H286 | 9.529440541  | -3.110441555 | -3.207064504 |
| H287 | 7.877003626  | -3.841174181 | -9.109522530 |
| H288 | 6.485409376  | -4.700219411 | -8.999118569 |
| H289 | 4.637380625  | 6.395986776  | -0.321855992 |
| H290 | 3.394607543  | 8.910632131  | 1.029393421  |
| H291 | 3.551518963  | 9.059191304  | -3.302133427 |
| H292 | 2.890161600  | 6.627910369  | -0.021857934 |
| H293 | 4.502930620  | 9.897782185  | 0.347263280  |
| H294 | 5.451577353  | 4.044933873  | -5.887740655 |
| H295 | 4.765724754  | 8.524435183  | -1.530738514 |
| H296 | 5.749176201  | -5.024441568 | 6.179981429  |
| H297 | 8.149191056  | -5.574618012 | 4.356864038  |
| H298 | 4.431192148  | 2.014784359  | -6.386808601 |
| H299 | 3.998897223  | 1.489536568  | 4.205723102  |
| H300 | 1.700600302  | 1.358778585  | -8.460084906 |
| H301 | 0.044380635  | -2.888434892 | -4.181889900 |
| H302 | 1.113712904  | 1.888286543  | -6.883943283 |
| H303 | 4.199890764  | -3.051072594 | 5.122708696  |
| H304 | 3.168300141  | 0.434048753  | -6.001461665 |
| H305 | 4.620628007  | -3.562852002 | 3.489792840  |
| H306 | 5.727112808  | -5.485339576 | 4.463595695  |
| H307 | 7.043592975  | -3.286860711 | 3.989253500  |
| H308 | 6.671559021  | -2.809470548 | 5.657313342  |
| H309 | -3.577784302 | -2.158109875 | -7.112145588 |
| H310 | 7.016099662  | -7.159164732 | 6.638143073  |
| H311 | 6.898136663  | -9.842849100 | 5.160685803  |
| H312 | 0.966706925  | -0.626059200 | -3.686475568 |
| H313 | 7.801178219  | -9.234701030 | 7.865304733  |
| H314 | 6.422375860  | -9.961967796 | 7.361882199  |
| H315 | 5.401540193  | -1.398586946 | 2.945442951  |
| H316 | -0.002249310 | 1.365283349  | -4.784653943 |
| H317 | -1.839599085 | -3.144049295 | -5.778273780 |
| H318 | 9.921244840  | -7.586237994 | 0.584074309  |
| H319 | 8.761655966  | -5.842731266 | -2.056018416 |
| H320 | 8.160521310  | -6.233705196 | 1.665368950  |
| H321 | 9.594905493  | -8.503694024 | -0.612351657 |
| H322 | 5.906760723  | 3.370343611  | -8.748765353 |
| H323 | 7.284901203  | -3.239509418 | 1.171643110  |

|       |              |               |              |
|-------|--------------|---------------|--------------|
| H324  | 3.870559338  | -6.482508790  | 1.898296712  |
| H325  | 4.994312597  | -1.300212457  | -6.692413526 |
| H326  | 5.170982725  | -8.085267154  | 0.356681985  |
| H327  | 5.803564092  | -5.888062386  | -5.981698038 |
| H328  | 4.315659764  | -4.631397120  | -4.333990776 |
| H329  | 8.546335017  | -9.986945982  | 5.780873382  |
| H330  | 4.699490178  | 0.702357765   | 2.797126399  |
| H331  | 9.262219039  | -3.433848682  | 2.547877640  |
| H332  | 7.801953397  | -1.777837574  | 1.224462823  |
| H333  | 9.729573764  | -4.138457197  | 4.781403116  |
| H334  | 4.036242070  | -1.355632429  | 6.282720241  |
| H335  | 6.209967205  | -10.664715426 | -2.320203084 |
| H336  | 5.896822993  | -7.125005935  | -2.458929070 |
| H337  | 7.011186785  | -6.967698460  | -1.086860279 |
| H338  | 4.089977022  | -7.934480295  | -1.054308082 |
| H339  | 2.954862231  | -1.883971352  | -5.541354404 |
| H340  | -1.874271493 | 1.117859031   | -6.434988966 |
| H341  | -3.766811742 | -0.396728405  | -7.276992770 |
| H342  | 3.172679195  | -5.022052434  | 1.122320217  |
| H343  | 9.731169712  | -4.913559163  | 2.564705034  |
| H344  | 8.999132246  | -7.030870473  | 2.693861652  |
| H345  | 3.303275480  | 0.188830411   | 6.037966879  |
| H346  | 8.229606476  | -6.046804436  | -5.151969987 |
| H347  | 8.106767951  | -4.303586916  | -1.493061098 |
| H348  | 2.511315823  | -2.923115656  | -6.931746743 |
| H349  | 4.257846628  | 4.905646403   | -6.883845959 |
| H350  | 6.472281787  | 2.172432834   | 5.292751783  |
| H351  | 6.786980818  | 2.516330862   | 3.577372241  |
| H352  | 11.238370632 | -4.304694048  | -4.280467110 |
| H353  | 10.797269795 | -5.734927012  | -3.620280191 |
| H354  | 12.264435110 | -5.746834691  | 0.616262466  |
| H355  | 10.656791253 | -5.864536348  | -0.991547759 |
| H356  | 13.590087711 | -4.305570188  | -1.310565589 |
| H357  | 11.580986447 | -4.155483469  | 1.021902999  |
| H358  | 9.459559289  | 2.838181003   | 4.061887042  |
| H359  | -6.641196330 | 12.245208679  | 2.031666205  |
| H360  | 10.358203459 | -3.731806796  | 7.699435423  |
| H361  | 9.513362778  | -1.555567811  | 6.200311983  |
| H362  | -7.822315598 | 10.863028839  | -0.380587515 |
| H363  | -6.712636908 | 9.142837470   | 1.923754796  |
| H364  | -8.413553925 | 9.254813472   | 1.440567570  |
| H365  | -7.336863055 | 5.046138906   | -3.355281678 |
| H366  | 0.286706080  | -1.927609737  | 0.608553644  |
| H367  | -1.348425714 | -0.532071701  | -0.922806652 |
| H368  | 1.751694111  | 0.038567515   | -1.827500083 |
| Mo369 | 4.986192273  | -3.318740162  | -1.389852632 |
| N370  | 1.961508199  | 0.549676580   | 1.570707038  |
| N371  | 2.205525322  | -0.008451240  | 0.624355866  |
| N372  | -4.655177831 | -8.501407242  | -1.114920712 |
| N373  | -7.554998370 | -6.563083932  | 0.210899058  |
| N374  | -7.834373055 | -6.763763505  | 3.027317455  |
| N375  | -5.193130268 | -7.199982717  | 3.863032015  |
| N376  | -3.963604761 | -4.738880054  | 3.063701604  |
| N377  | -5.383189225 | -2.977626934  | 4.787132005  |
| N378  | -4.822788306 | -3.996704414  | 7.429630827  |
| N379  | -2.005813226 | -4.589698329  | 7.666234264  |
| N380  | -0.533135856 | -2.544373787  | 6.524035894  |
| N381  | -1.754493562 | 0.203088234   | 6.622522405  |
| N382  | -2.838979360 | 0.043794348   | 9.262800304  |
| N383  | 7.066263289  | -9.196938501  | 7.155914783  |
| N384  | 7.513393771  | -6.951286648  | 5.765081787  |
| N385  | 4.992173600  | -1.557930737  | 3.871190616  |

|      |               |              |              |
|------|---------------|--------------|--------------|
| N386 | 3.773682908   | -0.617343582 | 5.638325131  |
| N387 | 4.254986806   | 0.626601189  | 3.734868644  |
| N388 | 9.608618479   | -4.160530480 | 5.817292906  |
| N389 | -4.319509289  | -4.342171115 | -3.595835329 |
| N390 | 0.139386452   | -5.858511179 | -2.949583417 |
| N391 | -5.320162183  | -1.948376297 | -3.094803038 |
| N392 | -7.972590469  | -1.682384659 | -2.383099412 |
| N393 | -7.769444083  | -1.522585007 | 0.414964724  |
| N394 | -6.276254251  | 0.783072204  | 1.106874704  |
| N395 | -3.546006022  | 1.612905246  | -1.894272472 |
| N396 | -2.165407369  | 0.123375594  | -1.002113058 |
| N397 | -7.661522104  | 3.155115926  | 1.375758310  |
| N398 | -11.367974762 | 5.173207894  | -0.799479693 |
| N399 | -11.897410284 | 7.007884120  | 0.330790533  |
| N400 | 7.959108187   | 4.938044499  | 3.968196751  |
| N401 | 4.247051669   | 8.912190872  | 0.459276488  |
| N402 | 2.722570017   | 9.320323325  | -2.774530262 |
| N403 | 0.552409502   | 7.693668475  | -3.604944388 |
| N404 | -3.332420149  | 5.047225506  | -5.305667849 |
| N405 | -3.238152112  | 6.980631210  | -6.628496455 |
| N406 | -4.917269067  | 6.728932726  | -5.051653663 |
| N407 | -0.639770826  | 6.557420914  | -1.277573045 |
| N408 | -1.210476282  | 8.834200088  | 0.263935421  |
| N409 | -3.074458875  | 10.813143797 | -0.544899733 |
| N410 | -3.543873125  | 9.337892478  | -3.336587556 |
| N411 | -5.770539132  | 10.857838775 | 0.058449254  |
| N412 | 6.858467891   | -3.751033561 | -9.092168850 |
| N413 | 4.401258031   | -2.060362292 | -7.049965175 |
| N414 | 2.601091999   | 0.391922603  | -6.867071345 |
| N415 | 4.128759652   | 2.817591110  | -6.947987224 |
| N416 | 0.958614430   | -3.562201441 | -9.911626489 |
| N417 | -1.283858987  | -2.129715630 | -8.874381148 |
| N418 | 10.427777623  | -4.840096648 | -3.956382578 |
| N419 | 6.109619471   | -4.450707530 | -3.164520115 |
| N420 | 6.138024398   | -5.485402521 | -5.110362431 |
| N421 | 11.096448713  | -4.947318592 | -0.898455513 |
| N422 | -0.306900982  | 2.573843055  | -1.222422393 |
| N423 | 0.721013403   | 2.143783664  | -1.413789238 |
| O424 | -5.372283979  | -6.545898447 | 0.865210399  |
| O425 | -7.361298430  | -4.542081772 | 3.183412519  |
| O426 | -5.763395210  | -6.476608173 | 5.957831590  |
| O427 | -2.554226116  | -5.031415395 | 4.826470828  |
| O428 | -3.558666010  | -1.622995318 | 4.753359526  |
| O429 | -4.836537006  | -1.813288283 | 8.097870571  |
| O430 | -2.213042066  | -4.290809235 | 9.932673261  |
| O431 | 1.461513739   | -3.510869161 | 7.139728783  |
| O432 | 0.406409714   | 0.602070425  | 7.246505881  |
| O433 | -1.864115167  | 2.067876221  | 9.601413773  |
| O434 | -1.547361076  | 0.234124360  | 12.599400946 |
| O435 | 8.668621120   | -8.047662805 | 4.084646195  |
| O436 | 8.335644713   | -4.909395330 | 7.579158432  |
| O437 | 11.425867732  | -1.221837277 | 6.825471656  |
| O438 | -5.186912216  | -2.178538784 | -0.813342858 |
| O439 | -1.738149785  | -5.405362771 | -4.147761166 |
| O440 | -7.721100909  | 0.560996071  | -2.060100036 |
| O441 | -6.323366970  | 1.254627286  | -4.722760416 |
| O442 | -10.046025361 | -1.265353182 | 0.584407242  |
| O443 | -6.516440532  | 0.315770343  | 3.329445404  |
| O444 | -5.927373967  | 4.091569858  | 2.522728086  |
| O445 | -9.012735213  | 5.630785010  | 3.516815176  |
| O446 | 9.379311530   | 2.497220000  | 6.074168263  |
| O447 | 1.598152230   | 5.782648428  | 4.074683996  |

|  |                    |              |                                 |              |              |              |
|--|--------------------|--------------|---------------------------------|--------------|--------------|--------------|
|  | O448               | 1.631982959  | 9.200177637                     | -0.779649573 |              |              |
|  | O449               | -0.716247565 | 9.576435974                     | -3.947412878 |              |              |
|  | O450               | -2.573166731 | 6.358681520                     | -2.481675548 |              |              |
|  | O451               | -2.730144915 | 7.633937281                     | 1.487257389  |              |              |
|  | O452               | 0.670524599  | 6.443966638                     | 1.380588685  |              |              |
|  | O453               | -2.349978788 | 12.223809070                    | 1.109292436  |              |              |
|  | O454               | -6.091200751 | 12.832352083                    | -1.036751785 |              |              |
|  | O455               | -5.651925540 | 10.221891110                    | -3.377251429 |              |              |
|  | O456               | -8.663796002 | 12.059025417                    | 1.810720128  |              |              |
|  | O457               | -6.490493234 | 5.277348859                     | -2.924806001 |              |              |
|  | O458               | 4.376354618  | -4.178383519                    | -7.948365361 |              |              |
|  | O459               | 1.511550395  | -1.027448617                    | -8.298628359 |              |              |
|  | O460               | 2.424384644  | 3.852589557                     | -8.064565128 |              |              |
|  | O461               | 6.731285393  | 5.098604975                     | -8.039419070 |              |              |
|  | O462               | -2.506104025 | -4.007667377                    | -9.315321306 |              |              |
|  | O463               | 1.299483644  | -6.898227019                    | -5.629708151 |              |              |
|  | O464               | 3.028594553  | -5.594042891                    | -6.162953067 |              |              |
|  | O465               | -2.688595316 | 1.118305516                     | -9.010324949 |              |              |
|  | O466               | 11.298309107 | -2.771493935                    | -1.489675774 |              |              |
|  | O467               | 14.070465121 | -3.512293087                    | 0.506566273  |              |              |
|  | O468               | 1.351441917  | -6.411836142                    | -0.189932470 |              |              |
|  | O469               | 2.168408032  | -8.141621361                    | 0.941775661  |              |              |
|  | O470               | 7.858304955  | -9.317500056                    | -1.488239549 |              |              |
|  | O471               | 5.772902142  | -9.793262654                    | -2.211724439 |              |              |
|  | O472               | 6.297261284  | -4.330412354                    | 0.107818550  |              |              |
|  | O473               | 6.417357621  | -6.074679782                    | 1.531056124  |              |              |
|  | O474               | 4.240994515  | -5.268549815                    | -1.207448345 |              |              |
|  | O475               | 9.925373252  | -4.031465259                    | 2.978702500  |              |              |
|  | O476               | 7.794431146  | -2.606699635                    | 1.740833685  |              |              |
|  | O477               | -4.886432726 | 3.316525417                     | -3.631248790 |              |              |
|  | O478               | 10.354709915 | -8.095858115                    | -0.147255220 |              |              |
|  | O479               | 9.105088542  | -6.473738693                    | 1.878073104  |              |              |
|  | S480               | 3.330745898  | 6.018041535                     | -2.342748412 |              |              |
|  | S481               | 2.718877589  | 2.598110751                     | -3.632939942 |              |              |
|  | S482               | 3.137161584  | -2.529267747                    | -2.715449903 |              |              |
|  | S483               | 3.129632411  | 3.094908355                     | -0.085301874 |              |              |
|  | S484               | 0.455831770  | -1.953390633                    | -0.740550299 |              |              |
|  | S485               | 5.209614071  | 0.134567057                     | -4.740922081 |              |              |
|  | S486               | 3.831688839  | -2.378495481                    | 0.505109256  |              |              |
|  | S487               | 5.931774921  | 2.984111912                     | -2.248684710 |              |              |
|  | S488               | 6.649926591  | -1.663190421                    | -1.757285831 |              |              |
|  | S489               | 6.059295921  | 0.661697600                     | 1.015278129  |              |              |
|  | <b>16, 47(3/2)</b> |              | <b>bm2unh2b2n2x266n2n.car_1</b> |              |              |              |
|  | Fe1                | 2.67         | C1                              | -6.687973985 | -6.635732052 | -0.234279805 |
|  | Fe2                | -0.88        | C2                              | -6.547000415 | -7.779476935 | -1.244232592 |
|  | Fe3                | 2.87         | C3                              | -8.206607710 | -4.991108116 | 0.778213090  |
|  | Fe4                | -2.10        | C4                              | -7.928409767 | -5.249155683 | 2.257783859  |
|  | Fe5                | 2.64         | C5                              | -7.868380970 | -6.863486792 | 4.090069489  |
|  | Fe6                | 0.04         | C6                              | -6.377737375 | -6.840693849 | 4.444057347  |
|  | Fe7                | -1.75        | C7                              | -4.082626643 | -7.041862517 | 3.610433805  |
|  |                    |              | C8                              | -3.602676501 | -5.588921363 | 3.668543838  |
|  |                    |              | C9                              | -3.828870187 | -3.312683833 | 2.836280977  |
|  |                    |              | C10                             | -4.264753070 | -2.622061965 | 4.137431685  |
|  |                    |              | C11                             | -5.893951679 | -2.440620442 | 5.925907600  |
|  |                    |              | C12                             | -5.112992334 | -2.929001164 | 7.154061563  |
|  |                    |              | C13                             | -4.320036001 | -4.867098703 | 8.423071284  |
|  |                    |              | C14                             | -2.790889867 | -4.944312414 | 8.523257705  |
|  |                    |              | C15                             | -0.667046553 | -5.259877487 | 7.320360023  |
|  |                    |              | C16                             | 0.167451044  | -4.080746901 | 6.807534090  |
|  |                    |              | C17                             | 0.062651167  | -1.819297209 | 5.767115309  |
|  |                    |              | C18                             | -0.277275722 | -0.604605430 | 6.651632251  |

|     |               |               |              |
|-----|---------------|---------------|--------------|
| C19 | -0.319081585  | -1.640820376  | 4.281471218  |
| C20 | 0.028730622   | -0.233552928  | 3.795172835  |
| C21 | 0.356958515   | -2.725922767  | 3.438955429  |
| C22 | -1.994808959  | 0.959376535   | 7.454158160  |
| C23 | -2.028093569  | 0.643458074   | 8.960100040  |
| C24 | -3.332104883  | 1.531703592   | 6.930457644  |
| C25 | -3.811362076  | 2.703533677   | 7.796285249  |
| C26 | -3.203343177  | 1.978764735   | 5.466714235  |
| C27 | -2.729656175  | -0.863074036  | 10.725898844 |
| C28 | -1.387923981  | -0.813350980  | 11.429908315 |
| C29 | 7.202143009   | -10.226498273 | 4.896795383  |
| C30 | 7.631605500   | -8.879428361  | 4.318456506  |
| C31 | 7.436966153   | -6.415950626  | 4.697204220  |
| C32 | 8.399574431   | -5.831449562  | 5.747703935  |
| C33 | 6.100524037   | -5.655535379  | 4.657500841  |
| C34 | 6.246058916   | -4.162011023  | 4.358153938  |
| C35 | 4.899178372   | -3.551046278  | 3.962443803  |
| C36 | 4.442340041   | -1.100344195  | 4.216995802  |
| C37 | 10.488920525  | -4.607876467  | 6.105731629  |
| C38 | 10.503116570  | -3.095013234  | 6.098340512  |
| C39 | -4.369835607  | -3.472501547  | -2.389398279 |
| C40 | -5.081489194  | -2.148517743  | -2.060948468 |
| C41 | -2.866861233  | -3.310965140  | -2.105960633 |
| C42 | -2.042724750  | -4.612764207  | -2.074134799 |
| C43 | -1.475074807  | -5.062653160  | -3.418970507 |
| C44 | -6.017584622  | -0.115739987  | -3.071774738 |
| C45 | -7.437622946  | 0.012818479   | -2.511457533 |
| C46 | -5.899965425  | 0.630532500   | -4.416084373 |
| C47 | -9.324222241  | -1.119649638  | -1.448617774 |
| C48 | -9.116753571  | -0.935630901  | 0.061946503  |
| C49 | -7.530236987  | -0.933257840  | 1.938453545  |
| C50 | -6.650475634  | 0.248757865   | 2.341632160  |
| C51 | -5.321560784  | 2.193982363   | 1.645034322  |
| C52 | -6.106516022  | 3.402803720   | 2.216454451  |
| C53 | -4.578609838  | 2.707484322   | 0.401142798  |
| C54 | -3.622938465  | 1.769602086   | -0.267738796 |
| C55 | -2.837053144  | 0.724251024   | 0.158091549  |
| C56 | -2.394202819  | 1.043198815   | -1.984636059 |
| C57 | -8.235264449  | 4.650751430   | 2.092550033  |
| C58 | -8.453415000  | 4.774836044   | 3.600559404  |
| C59 | -9.584002962  | 4.457900899   | 1.359874948  |
| C60 | -10.378843226 | 5.703628326   | 1.098657762  |
| C61 | -10.619299343 | 6.808557527   | 1.893780087  |
| C62 | -11.649760480 | 7.021044459   | -0.057411759 |
| C63 | 8.058511270   | 3.019151940   | 5.070617685  |
| C64 | 9.230798565   | 2.055543342   | 5.061473383  |
| C65 | 6.813781791   | 2.214542931   | 4.613869067  |
| C66 | 5.550662573   | 3.043555657   | 4.601507663  |
| C67 | 4.756427788   | 3.176172357   | 5.755737947  |
| C68 | 5.127039229   | 3.701899364   | 3.432769618  |
| C69 | 3.579422423   | 3.932090500   | 5.747128201  |
| C70 | 3.962831928   | 4.469956343   | 3.411906132  |
| C71 | 3.185214540   | 4.578182018   | 4.568760422  |
| C72 | 4.394930905   | 8.152760485   | -0.296628443 |
| C73 | 3.176309527   | 8.929330729   | -0.814294190 |
| C74 | 4.081905770   | 6.647624115   | -0.258718007 |
| C75 | 2.138614773   | 10.053590546  | -2.731781369 |
| C76 | 0.862206665   | 9.251762857   | -2.986256669 |
| C77 | -0.205109788  | 7.046850665   | -3.198944490 |
| C78 | -0.976478867  | 6.773368475   | -1.891336523 |
| C79 | 0.231092037   | 5.753536006   | -3.912240029 |
| C80 | -0.854208928  | 4.714589868   | -4.219807662 |

|       |              |              |              |
|-------|--------------|--------------|--------------|
| C81   | -1.866553136 | 5.051073854  | -5.332120573 |
| C82   | -3.544624973 | 6.896254632  | -5.127749883 |
| C83   | -0.903441426 | 6.392446967  | 0.528152120  |
| C84   | -1.328074175 | 7.675254683  | 1.272362474  |
| C85   | -0.047881295 | 5.537844620  | 1.468408606  |
| C86   | -0.710904829 | 9.965416877  | 1.871664485  |
| C87   | -1.583453446 | 11.149113030 | 1.458319129  |
| C88   | -3.164176841 | 12.086638018 | -0.180112255 |
| C89   | -4.608063484 | 12.196124628 | 0.353686805  |
| C90   | -3.160871063 | 12.065228334 | -1.726270727 |
| C91   | -3.842260709 | 10.820548429 | -2.283267413 |
| C92   | -6.452529430 | 11.051735327 | 1.506835994  |
| C93   | -6.715207441 | 12.053950463 | 2.625422643  |
| C94   | -6.763076491 | 9.611604827  | 1.994902171  |
| C95   | -6.650377183 | 8.585934290  | 0.890046665  |
| C96   | -7.724842255 | 8.355909611  | 0.016129649  |
| C97   | -5.459038551 | 7.871405342  | 0.677823841  |
| C98   | -7.613162610 | 7.457045903  | -1.047469251 |
| C99   | -5.319815802 | 6.986145840  | -0.396311238 |
| C100  | -6.402020897 | 6.794370950  | -1.253616736 |
| C101  | 6.114162511  | -2.737915105 | -8.262582690 |
| C102  | 4.620152366  | -2.809741823 | -7.988626758 |
| C103  | 2.730485344  | -1.661160180 | -6.844011557 |
| C104  | 2.078661921  | -0.405179746 | -7.430536782 |
| C105  | 1.967397003  | 2.036087179  | -7.328869322 |
| C106  | 2.911754818  | 3.234759277  | -7.339156461 |
| C107  | 4.998483451  | 4.274910697  | -6.611769714 |
| C108  | 5.986779072  | 4.444061953  | -7.748277839 |
| C109  | -0.549795289 | -3.532614732 | -9.474766227 |
| C110  | -1.802634147 | -2.656635297 | -9.330827847 |
| C111  | -0.193988196 | -4.170229805 | -8.112104000 |
| C112  | 0.784459005  | -5.346961459 | -8.293546581 |
| C113  | 1.363819066  | -5.775835848 | -6.964285958 |
| C114  | -2.717906986 | -0.465294874 | -8.714071573 |
| C115  | -2.387368494 | 0.908030286  | -9.268845406 |
| C116  | -3.259599864 | -0.453537039 | -7.261169497 |
| C117  | -2.169056700 | -0.408129247 | -6.218435178 |
| C118  | -1.564700125 | 0.802761764  | -5.832915566 |
| C119  | -1.678147444 | -1.604909821 | -5.669275501 |
| C120  | -0.478753753 | 0.803133822  | -4.948283564 |
| C121  | -0.588379699 | -1.603769227 | -4.792887114 |
| C122  | 0.022455028  | -0.397768883 | -4.435999756 |
| C123  | 9.472542973  | -4.453774229 | -3.399086181 |
| C124  | 10.483172095 | -4.362802253 | -2.241584762 |
| C125  | 8.157853841  | -5.120500334 | -2.960205099 |
| C126  | 7.037203612  | -5.067526213 | -3.953931490 |
| C127  | 7.002856625  | -5.595402289 | -5.228854214 |
| C128  | 5.006669021  | -4.782332962 | -4.718975586 |
| C129  | 11.726336697 | -5.458702767 | -0.458803715 |
| C130  | 13.048530292 | -4.862864903 | -0.892412448 |
| C131  | 1.864472134  | -6.987136822 | -0.067884927 |
| C132  | 3.145987540  | -6.351270537 | 0.401979598  |
| C133  | 4.261305810  | -6.305130440 | -0.716462473 |
| C134  | 4.516294975  | -7.739155393 | -1.261525854 |
| C135  | 5.705240688  | -7.802801848 | -2.233741395 |
| C136  | 6.145171939  | -9.200156024 | -2.573846261 |
| C137  | 5.563271641  | -5.834604616 | 0.003806849  |
| C138  | 4.013036531  | 0.138072928  | -1.616864591 |
| Fe139 | 4.631164020  | -1.109571084 | -3.069033454 |
| Fe140 | 2.484409597  | 1.571610089  | -1.579123527 |
| Fe141 | 5.021629336  | 1.495762528  | -0.529793603 |
| Fe142 | 4.575382749  | 1.414747120  | -3.056349706 |

|       |              |              |              |
|-------|--------------|--------------|--------------|
| Fe143 | 3.980654660  | 3.717558388  | -1.892565215 |
| Fe144 | 5.064959789  | -1.081648292 | -0.564905307 |
| Fe145 | 2.508013657  | -1.047629330 | -0.969298293 |
| H146  | -4.606254963 | -8.222585580 | -0.811189011 |
| H147  | -4.782177218 | -7.343065810 | -2.176214074 |
| H148  | -8.671854981 | -6.425788765 | -0.737794436 |
| H149  | -7.150350875 | -7.551905813 | -2.136901476 |
| H150  | -7.016136455 | -8.664556230 | -0.778018668 |
| H151  | -7.586591154 | -4.129326086 | 0.491462201  |
| H152  | -8.498289813 | -7.211584106 | 2.062205557  |
| H153  | -9.262546747 | -4.708618799 | 0.664911584  |
| H154  | -8.262337859 | -7.871285400 | 4.275434265  |
| H155  | -5.886840085 | -7.260277332 | 2.496580202  |
| H156  | -8.367493426 | -6.166973548 | 4.775982750  |
| H157  | -2.742423970 | -3.175433899 | 2.760728114  |
| H158  | -4.801926151 | -5.070162817 | 2.061212636  |
| H159  | -3.588473751 | -7.558686202 | 2.776226750  |
| H160  | -5.797241411 | -1.348393301 | 5.889804423  |
| H161  | -6.052730584 | -3.665841079 | 4.162278838  |
| H162  | -3.770416922 | -7.518712343 | 4.547753637  |
| H163  | -4.300264357 | -2.817365300 | 1.974893288  |
| H164  | -5.261869464 | -4.888468450 | 6.506373024  |
| H165  | -6.953972418 | -2.695369504 | 6.064688246  |
| H166  | 0.147809543  | -3.730704582 | 3.833306949  |
| H167  | -0.003617843 | -2.694465246 | 2.401099110  |
| H168  | 1.447560046  | -2.581217683 | 3.413329079  |
| H169  | -1.410488970 | -1.767598377 | 4.208877874  |
| H170  | -4.707123167 | -5.893002806 | 8.505073374  |
| H171  | -2.967545856 | 1.145340107  | 4.789970973  |
| H172  | -3.143591643 | -1.086711065 | 8.647590822  |
| H173  | -3.984954729 | 2.411709461  | 8.842041832  |
| H174  | -0.197516377 | -0.130960953 | 2.725519351  |
| H175  | 1.099465803  | -0.022199576 | 3.917207837  |
| H176  | 7.892485024  | 3.330978200  | 6.120440583  |
| H177  | -4.151239168 | 2.422455895  | 5.127054157  |
| H178  | -4.754388338 | 3.100817195  | 7.391963586  |
| H179  | -2.415542690 | 2.742664179  | 5.364257280  |
| H180  | -3.071196953 | 3.519176073  | 7.792617438  |
| H181  | -4.088686042 | 0.728092329  | 6.985127142  |
| H182  | -1.213043693 | 1.726176234  | 7.347098396  |
| H183  | -2.268855956 | -0.666127797 | 6.068236164  |
| H184  | -0.538406448 | 0.540327261  | 4.332335721  |
| H185  | 0.267034482  | 4.627657545  | 0.929356947  |
| H186  | -0.683975453 | 5.243600401  | 2.318609099  |
| H187  | 1.381195319  | 5.925493388  | 2.757908645  |
| H188  | 1.550498332  | 5.295436870  | 5.334409420  |
| H189  | 3.635843636  | 4.948440113  | 2.487160794  |
| H190  | 5.697897131  | 3.585685264  | 2.508975654  |
| H191  | 5.058219310  | 2.676128035  | 6.680620736  |
| H192  | -1.554076708 | -3.111538794 | 6.320342703  |
| H193  | -0.419320873 | -6.126858702 | 6.690376396  |
| H194  | -0.328331565 | -5.477040636 | 8.341586707  |
| H195  | -2.616050568 | -5.185894036 | 6.467913382  |
| H196  | -4.657424480 | -4.302911450 | 9.301780066  |
| H197  | 2.964743521  | 4.005439369  | 6.647712481  |
| H198  | 1.148585649  | -1.949900695 | 5.855447990  |
| H199  | -3.443193425 | -0.222099051 | 11.269143632 |
| H200  | -3.090523200 | -1.901376960 | 10.793794411 |
| H201  | -0.504931747 | -0.995232933 | 10.774143721 |
| H202  | 11.492486506 | -4.982604011 | 5.853805993  |
| H203  | 0.170421063  | -5.950266946 | -4.256967676 |
| H204  | 2.475312917  | -8.634036460 | 0.733928676  |



|      |               |              |               |
|------|---------------|--------------|---------------|
| H205 | 0.246944250   | -6.202018396 | -8.727796484  |
| H206 | 1.594804275   | -5.060543974 | -8.980303656  |
| H207 | -1.104248465  | -4.534350420 | -7.611974612  |
| H208 | -1.716018825  | 0.889994216  | -10.159187786 |
| H209 | -0.882123642  | -4.346591196 | -10.138405608 |
| H210 | -2.438078578  | -2.618136114 | -2.845195322  |
| H211 | -2.653746407  | -5.447462436 | -1.686193704  |
| H212 | -0.654133720  | -1.049471809 | -8.707410031  |
| H213 | -3.535175141  | -0.835167298 | -9.365537130  |
| H214 | 1.004052319   | -2.157830607 | -9.550508307  |
| H215 | 0.285727924   | -5.693686664 | -2.514429447  |
| H216 | 0.239499027   | -3.397821044 | -7.458124711  |
| H217 | 1.236693205   | -3.496923488 | -10.483353599 |
| H218 | -5.407793453  | -4.525099439 | -3.835839865  |
| H219 | -2.763597860  | -2.829262746 | -1.124300617  |
| H220 | 2.958850468   | -4.698311384 | -7.384563257  |
| H221 | -1.211027837  | -4.477550444 | -1.367522148  |
| H222 | -4.610608582  | 1.903290104  | 2.431572054   |
| H223 | -2.754700996  | 0.254753620  | 1.132327094   |
| H224 | -8.481619168  | -0.817013390 | 2.474868334   |
| H225 | -7.080548705  | -1.346525787 | -0.109589883  |
| H226 | -7.794365946  | 2.713771857  | 1.286673748   |
| H227 | -10.281839810 | 7.081157101  | 2.886957835   |
| H228 | -8.501518450  | 3.793000711  | 4.131995232   |
| H229 | -10.190205248 | 3.710237117  | 1.901799031   |
| H230 | -7.737570222  | 5.566621170  | 1.737672448   |
| H231 | -12.261972157 | 7.467095797  | -0.837411736  |
| H232 | -4.028907582  | 3.608593089  | 0.714533247   |
| H233 | -5.322356849  | 3.043118125  | -0.339293392  |
| H234 | -11.782341235 | 8.542193080  | 1.427659959   |
| H235 | -9.363908325  | 4.019322980  | 0.373653582   |
| H236 | -6.344416471  | 0.785627645  | 0.372485525   |
| H237 | -7.058630771  | -1.851109198 | 2.319285286   |
| H238 | -9.978505095  | -0.303524878 | -1.781107468  |
| H239 | -1.951268644  | 0.950110614  | -2.973331774  |
| H240 | -9.858421478  | -2.065574131 | -1.608716222  |
| H241 | 9.004689852   | 4.767290199  | 4.570415478   |
| H242 | 7.480961453   | 4.658043692  | 3.987241243   |
| H243 | 0.775125829   | 6.606550800  | -0.801899383  |
| H244 | -1.833510472  | 5.844892469  | 0.321245376   |
| H245 | 0.204793785   | 8.741187383  | 0.411659577   |
| H246 | -3.734819015  | 2.688209664  | -2.211353591  |
| H247 | -5.281225080  | 3.305753482  | -3.666389713  |
| H248 | -5.306608297  | 4.563429524  | -2.692184850  |
| H249 | -4.853643099  | 0.606994962  | -4.750634954  |
| H250 | -6.525568931  | 0.135670974  | -5.178113926  |
| H251 | -2.119371189  | 12.144942248 | -2.070282886  |
| H252 | -3.717772196  | 12.945701302 | -2.071651868  |
| H253 | -2.001629625  | 9.867801649  | -2.663203485  |
| H254 | -3.439927825  | 8.899971195  | -2.851854080  |
| H255 | -3.319188619  | 8.603798912  | -6.226991670  |
| H256 | -2.159917950  | 4.127159019  | -5.851408204  |
| H257 | -8.462168116  | 7.279176349  | -1.712241305  |
| H258 | -4.613028250  | 7.993568900  | 1.360639004   |
| H259 | -5.067433922  | 6.849769456  | -3.733040264  |
| H260 | 1.004061352   | 5.261110454  | -3.300112137  |
| H261 | 1.865316697   | 7.449630497  | -2.779139835  |
| H262 | -1.394229258  | 4.427706212  | -3.304398288  |
| H263 | -7.660436891  | -2.006241195 | -2.481331779  |
| H264 | 2.480371521   | 10.456486424 | -3.695115572  |
| H265 | -5.320592780  | -1.974760732 | -4.039036426  |
| H266 | 0.723817944   | 6.051139783  | -4.852644736  |

|      |              |               |              |
|------|--------------|---------------|--------------|
| H267 | -4.369755313 | 6.481448754   | -0.578278376 |
| H268 | -7.051858320 | 2.005283763   | -3.647960549 |
| H269 | 1.840130012  | 10.903864731  | -2.101985665 |
| H270 | -2.366601929 | 7.274995513   | -6.769365356 |
| H271 | -5.129571685 | 8.160790104   | -4.860742163 |
| H272 | -3.789142303 | -4.300326600  | -4.182854991 |
| H273 | -4.772780819 | -4.200711887  | -1.659379212 |
| H274 | -8.670572743 | 8.880449290   | 0.168043440  |
| H275 | -5.397510150 | 0.422318211   | -2.335282751 |
| H276 | -0.911334037 | 7.607118662   | -3.826514229 |
| H277 | -1.393927915 | 5.691558370   | -6.087899925 |
| H278 | -0.317136478 | 3.813988755   | -4.548074656 |
| H279 | -3.687291943 | 5.088355410   | -4.216524543 |
| H280 | -1.087526425 | 9.628748457   | 2.849759331  |
| H281 | -2.273837792 | 10.126893068  | -0.183213479 |
| H282 | -2.669576959 | 13.012791482  | 0.147211673  |
| H283 | 0.304811452  | 10.357877157  | 2.018474760  |
| H284 | -4.444925628 | 10.348061964  | 1.209128067  |
| H285 | 6.433674644  | -1.686501174  | -8.305149507 |
| H286 | 6.601559317  | -3.185761619  | -7.371432393 |
| H287 | 9.266055445  | -3.410649190  | -3.677814016 |
| H288 | 7.449642439  | -3.547800065  | -9.572894868 |
| H289 | 6.014770736  | -4.336903302  | -9.520522567 |
| H290 | 4.976703744  | 6.125349258   | 0.102983876  |
| H291 | 3.965694930  | 8.608890085   | 1.640323909  |
| H292 | 4.029725830  | 9.056063499   | -2.678214834 |
| H293 | 3.255436679  | 6.464350655   | 0.443813850  |
| H294 | 5.124383407  | 9.563141759   | 0.997747347  |
| H295 | 5.550093243  | 4.199333978   | -5.662192453 |
| H296 | 5.242683688  | 8.314354854   | -0.980321579 |
| H297 | 5.580848252  | -5.803994808  | 5.618197032  |
| H298 | 7.904109454  | -6.384010852  | 3.705443415  |
| H299 | 4.398872452  | 2.264616003   | -6.254458207 |
| H300 | 4.159496442  | 0.928919055   | 4.131719967  |
| H301 | 1.595425075  | 1.901575988   | -8.352691821 |
| H302 | -0.210286745 | -2.543401430  | -4.385785282 |
| H303 | 1.101015274  | 2.343526192   | -6.719276623 |
| H304 | 4.159666053  | -3.659154739  | 4.767191983  |
| H305 | 3.086078760  | 0.693047950   | -6.033674466 |
| H306 | 4.493562489  | -4.085913527  | 3.089458768  |
| H307 | 5.488924905  | -6.135525698  | 3.876441491  |
| H308 | 6.947422801  | -4.004916823  | 3.524753301  |
| H309 | 6.651438355  | -3.627516328  | 5.232513463  |
| H310 | -3.863447017 | -1.362115391  | -7.123405074 |
| H311 | 6.696808127  | -8.058063816  | 5.880623939  |
| H312 | 6.430065697  | -10.614945561 | 4.215303423  |
| H313 | 0.877240607  | -0.390746890  | -3.756738699 |
| H314 | 7.383321083  | -10.255808133 | 6.948596222  |
| H315 | 5.970048919  | -10.883648655 | 6.409931744  |
| H316 | 5.415101345  | -1.943225476  | 2.670099459  |
| H317 | -0.000189810 | 1.740109645   | -4.652838482 |
| H318 | -2.150318006 | -2.554106116  | -5.934295145 |
| H319 | 9.465599044  | -8.188634979  | -0.245621409 |
| H320 | 8.365553412  | -6.179349008  | -2.723367130 |
| H321 | 7.830870794  | -6.819982058  | 0.972205541  |
| H322 | 9.051514269  | -8.990833774  | -1.497822295 |
| H323 | 5.871926045  | 3.720367118   | -8.591227146 |
| H324 | 7.109584545  | -3.756630812  | 0.741001219  |
| H325 | 3.545651856  | -6.876960140  | 1.281292676  |
| H326 | 4.758853994  | -1.089376037  | -6.883357402 |
| H327 | 4.712027910  | -8.405021365  | -0.406966336 |
| H328 | 5.350406531  | -5.705454693  | -6.587114780 |

|       |              |               |              |
|-------|--------------|---------------|--------------|
| H329  | 3.956645593  | -4.527825689  | -4.810124918 |
| H330  | 8.072162661  | -10.899692879 | 4.807014434  |
| H331  | 4.854667401  | 0.212271358   | 2.678270437  |
| H332  | 9.118109957  | -4.162359850  | 2.039761572  |
| H333  | 7.689840006  | -2.327970580  | 0.904208441  |
| H334  | 9.579375232  | -5.077570706  | 4.207531446  |
| H335  | 4.101713485  | -2.022492604  | 6.027167479  |
| H336  | 5.533354563  | -10.835894405 | -3.303120201 |
| H337  | 5.432722697  | -7.286621429  | -3.166808371 |
| H338  | 6.580783059  | -7.299171262  | -1.809411536 |
| H339  | 3.608521773  | -8.092285851  | -1.771705484 |
| H340  | 2.703417497  | -1.641149627  | -5.743138524 |
| H341  | -1.932448421 | 1.741939829   | -6.255007703 |
| H342  | -3.929627081 | 0.416599503   | -7.178798044 |
| H343  | 2.933058931  | -5.306903116  | 0.670081540  |
| H344  | 9.485622821  | -5.664855666  | 1.936445289  |
| H345  | 8.641482530  | -7.739892237  | 1.921869170  |
| H346  | 3.480090425  | -0.428207444  | 5.891686091  |
| H347  | 7.771337195  | -6.077378138  | -5.818761307 |
| H348  | 7.816697196  | -4.655222834  | -2.025561076 |
| H349  | 2.175028871  | -2.529230706  | -7.203824179 |
| H350  | 4.380034107  | 5.185021988   | -6.565174939 |
| H351  | 6.697580789  | 1.363697590   | 5.302426397  |
| H352  | 7.004145360  | 1.808277334   | 3.607034815  |
| H353  | 10.877201870 | -4.589573417  | -4.888314745 |
| H354  | 10.397288067 | -6.047998149  | -4.324014079 |
| H355  | 11.922906277 | -6.497454589  | -0.147765007 |
| H356  | 10.273272336 | -6.384922540  | -1.710030306 |
| H357  | 13.286770731 | -4.988384732  | -1.975806204 |
| H358  | 11.341060221 | -4.910987588  | 0.416336578  |
| H359  | 9.712376916  | 1.932071500   | 4.061720784  |
| H360  | -5.802069202 | 12.425562699  | 3.147273928  |
| H361  | 10.259320132 | -4.923466045  | 7.138724476  |
| H362  | 9.541185751  | -2.611675866  | 5.799963170  |
| H363  | -7.127803672 | 11.304358801  | 0.673077346  |
| H364  | -6.074105420 | 9.361211762   | 2.817545606  |
| H365  | -7.779433515 | 9.620396431   | 2.414129611  |
| H366  | -7.092333917 | 5.849174989   | -2.808834988 |
| H367  | 0.130486537  | -1.950869174  | 0.471968988  |
| H368  | -1.279720630 | -0.438988487  | -0.905763703 |
| H369  | 1.711977584  | 0.092003913   | -1.869708539 |
| Mo370 | 4.732913437  | -3.511746555  | -1.769132901 |
| N371  | 2.117775070  | 0.285263624   | 1.618023791  |
| N372  | 2.243018407  | -0.181955765  | 0.601545479  |
| N373  | -5.191458125 | -8.113730371  | -1.643181534 |
| N374  | -7.945581965 | -6.130595750  | -0.089942309 |
| N375  | -8.148560768 | -6.508644270  | 2.708765522  |
| N376  | -5.522455193 | -7.168195011  | 3.443746991  |
| N377  | -4.169845475 | -4.726664191  | 2.786497334  |
| N378  | -5.442486168 | -3.023863370  | 4.673595564  |
| N379  | -4.875179535 | -4.265318329  | 7.220355639  |
| N380  | -2.107430566 | -5.066600676  | 7.349856324  |
| N381  | -0.539627711 | -3.025372226  | 6.331626548  |
| N382  | -1.584460242 | -0.212285583  | 6.677057911  |
| N383  | -2.624586466 | -0.520151086  | 9.321005704  |
| N384  | 6.644665960  | -10.133389033 | 6.252120829  |
| N385  | 7.194954339  | -7.816122387  | 5.016953382  |
| N386  | 5.009546558  | -2.139383041  | 3.589987289  |
| N387  | 3.838229555  | -1.253222678  | 5.419834606  |
| N388  | 4.426698875  | 0.093917578   | 3.619148196  |
| N389  | 9.475352343  | -5.179249994  | 5.240373315  |
| N390  | -4.636632760 | -3.856129031  | -3.782622560 |

|      |               |              |               |
|------|---------------|--------------|---------------|
| N391 | -0.250099162  | -5.621287225 | -3.381815956  |
| N392 | -5.522039984  | -1.473567012 | -3.157313309  |
| N393 | -8.104670339  | -1.125333250 | -2.233075454  |
| N394 | -7.837666626  | -1.065489457 | 0.524575264   |
| N395 | -6.178360830  | 1.053908364  | 1.339482946   |
| N396 | -3.329404369  | 1.936417657  | -1.614493467  |
| N397 | -2.093933030  | 0.291392282  | -0.923123634  |
| N398 | -7.400641587  | 3.488127533  | 1.815302470   |
| N399 | -11.029574622 | 5.848449913  | -0.115936236  |
| N400 | -11.425267289 | 7.635241448  | 1.138700594   |
| N401 | 8.336743843   | 4.119359236  | 4.145916268   |
| N402 | 4.800259068   | 8.592969108  | 1.044869466   |
| N403 | 3.232743972   | 9.335747670  | -2.112245585  |
| N404 | 0.963400810   | 7.903018719  | -3.004769324  |
| N405 | -3.107803678  | 5.670120455  | -4.850559274  |
| N406 | -2.928167880  | 7.687084602  | -6.031531448  |
| N407 | -4.584970368  | 7.414702137  | -4.435800299  |
| N408 | -0.245176816  | 6.632884112  | -0.752051290  |
| N409 | -0.648501116  | 8.820656412  | 0.973295464   |
| N410 | -2.397024696  | 10.973885960 | 0.374030977   |
| N411 | -3.014689321  | 9.767266022  | -2.525292389  |
| N412 | -5.072430623  | 11.132858896 | 1.053091395   |
| N413 | 6.438253469   | -3.404480248 | -9.527176579  |
| N414 | 4.113519365   | -1.778658157 | -7.287712462  |
| N415 | 2.482047338   | 0.757418623  | -6.872575954  |
| N416 | 4.135938526   | 3.115069158  | -6.762496862  |
| N417 | 0.531557140   | -2.826094646 | -10.171420981 |
| N418 | -1.600061103  | -1.366358027 | -8.941845874  |
| N419 | 10.054544379  | -5.117191913 | -4.581239305  |
| N420 | 5.774472736   | -4.556207002 | -3.657646696  |
| N421 | 5.718733268   | -5.406275129 | -5.689646914  |
| N422 | 10.766717652  | -5.504710761 | -1.552807297  |
| N423 | -0.165620459  | 2.648884228  | -0.973585002  |
| N424 | 0.842049644   | 2.191327471  | -1.220542492  |
| O425 | -5.737745452  | -6.230971708 | 0.460877072   |
| O426 | -7.528849642  | -4.333064859 | 2.995006540   |
| O427 | -6.002658952  | -6.560170326 | 5.594528211   |
| O428 | -2.751276933  | -5.222039888 | 4.493610282   |
| O429 | -3.563713057  | -1.741890311 | 4.661299245   |
| O430 | -4.768701816  | -2.137991665 | 8.048878670   |
| O431 | -2.252109845  | -4.933788173 | 9.638354494   |
| O432 | 1.405380667   | -4.145363401 | 6.826771056   |
| O433 | 0.602008187   | -0.021773601 | 7.303782132   |
| O434 | -1.532670120  | 1.409659699  | 9.802700643   |
| O435 | -1.270456798  | -0.662541896 | 12.637313879  |
| O436 | 8.302325366   | -8.846280532 | 3.264710178   |
| O437 | 8.177677003   | -5.977864674 | 6.963048576   |
| O438 | 11.478624921  | -2.431510486 | 6.409756875   |
| O439 | -5.247660946  | -1.733556035 | -0.895216313  |
| O440 | -2.110925774  | -4.935507360 | -4.491515720  |
| O441 | -7.903057961  | 1.150544856  | -2.284780771  |
| O442 | -6.285456720  | 2.007379036  | -4.278346768  |
| O443 | -10.093166043 | -0.696000444 | 0.780972237   |
| O444 | -6.401885678  | 0.456332205  | 3.531736213   |
| O445 | -5.544249617  | 4.258958859  | 2.905847034   |
| O446 | -8.602498083  | 5.831198739  | 4.189919427   |
| O447 | 9.618291590   | 1.432389682  | 6.039330820   |
| O448 | 2.027278658   | 5.325211344  | 4.484547104   |
| O449 | 2.188131328   | 9.170423983  | -0.096071462  |
| O450 | -0.201483242  | 9.870753402  | -3.192307237  |
| O451 | -2.215227070  | 6.689560330  | -1.908414913  |
| O452 | -2.226596139  | 7.622361208  | 2.123689780   |

|  |                                   |              |              |              |
|--|-----------------------------------|--------------|--------------|--------------|
|  | O453                              | 1.078715243  | 6.300806689  | 1.905587885  |
|  | O454                              | -1.556535258 | 12.194721985 | 2.118987819  |
|  | O455                              | -5.286977104 | 13.209558351 | 0.138129039  |
|  | O456                              | -5.073847756 | 10.753526268 | -2.418004025 |
|  | O457                              | -7.835041897 | 12.405430307 | 2.957611127  |
|  | O458                              | -6.232326274 | 5.934160390  | -2.353078551 |
|  | O459                              | 3.946341612  | -3.800165175 | -8.373395539 |
|  | O460                              | 1.256466826  | -0.467985731 | -8.369492271 |
|  | O461                              | 2.506629355  | 4.291601850  | -7.850427031 |
|  | O462                              | 6.847822144  | 5.308969111  | -7.760566211 |
|  | O463                              | -2.938269101 | -3.116198543 | -9.534440887 |
|  | O464                              | 0.775938597  | -6.502371872 | -6.168391308 |
|  | O465                              | 2.574191688  | -5.271347349 | -6.648710807 |
|  | O466                              | -2.831728307 | 1.958729645  | -8.831095832 |
|  | O467                              | 11.080304780 | -3.302432479 | -1.979324162 |
|  | O468                              | 13.846774059 | -4.352202879 | -0.119984689 |
|  | O469                              | 0.975767244  | -6.430151857 | -0.692842132 |
|  | O470                              | 1.703269421  | -8.318620538 | 0.225937191  |
|  | O471                              | 7.276776258  | -9.650218460 | -2.407987868 |
|  | O472                              | 5.150384953  | -9.952772039 | -3.112677501 |
|  | O473                              | 6.017989652  | -4.685135980 | -0.381193643 |
|  | O474                              | 6.113660369  | -6.561222569 | 0.861580140  |
|  | O475                              | 3.897048008  | -5.430047013 | -1.723321716 |
|  | O476                              | 9.745018066  | -4.831730311 | 2.412222668  |
|  | O477                              | 7.672859080  | -3.202216620 | 1.339665815  |
|  | O478                              | -4.705019163 | 3.964085117  | -3.191552410 |
|  | O479                              | 9.845977505  | -8.668829121 | -1.023841112 |
|  | O480                              | 8.763732686  | -7.125482519 | 1.151483144  |
|  | S481                              | 3.612537315  | 5.968026578  | -1.918435653 |
|  | S482                              | 2.799888235  | 2.697387956  | -3.472858647 |
|  | S483                              | 2.879450665  | -2.508157505 | -2.952486931 |
|  | S484                              | 3.333465501  | 2.891435095  | 0.089765669  |
|  | S485                              | 0.266157636  | -1.840753810 | -0.875767754 |
|  | S486                              | 5.093066620  | 0.186790107  | -4.832026776 |
|  | S487                              | 3.675423393  | -2.645579875 | 0.225320383  |
|  | S488                              | 6.053022246  | 2.788915240  | -2.147101482 |
|  | S489                              | 6.481950813  | -1.932348375 | -2.059779389 |
|  | S490                              | 6.161893587  | 0.187599159  | 0.874839258  |
|  | <b>16, 35(1/2)</b>                |              |              |              |
|  | <b>Fe1</b>                        | <b>2.93</b>  |              |              |
|  | <b>Fe2</b>                        | <b>-1.63</b> |              |              |
|  | <b>Fe3</b>                        | <b>-2.76</b> |              |              |
|  | <b>Fe4</b>                        | <b>2.49</b>  |              |              |
|  | <b>Fe5</b>                        | <b>-2.63</b> |              |              |
|  | <b>Fe6</b>                        | <b>-0.38</b> |              |              |
|  | <b>Fe7</b>                        | <b>1.67</b>  |              |              |
|  | <b>bm2unh2b2n2x266n2n35.car_1</b> |              |              |              |
|  | C1                                | -6.679327828 | -6.629707260 | -0.238408124 |
|  | C2                                | -6.531891493 | -7.771543326 | -1.250528758 |
|  | C3                                | -8.202866140 | -4.990050655 | 0.773399730  |
|  | C4                                | -7.927171010 | -5.249079942 | 2.252562358  |
|  | C5                                | -7.869065760 | -6.859482391 | 4.086807531  |
|  | C6                                | -6.378204916 | -6.835760381 | 4.440862867  |
|  | C7                                | -4.082477197 | -7.045617455 | 3.609646143  |
|  | C8                                | -3.596678391 | -5.594816209 | 3.671287323  |
|  | C9                                | -3.821853978 | -3.314817336 | 2.844098901  |
|  | C10                               | -4.259823911 | -2.629219824 | 4.147486944  |
|  | C11                               | -5.898371609 | -2.448349091 | 5.927059737  |
|  | C12                               | -5.117796092 | -2.935801586 | 7.155932067  |
|  | C13                               | -4.313533817 | -4.869168504 | 8.422613573  |
|  | C14                               | -2.784101484 | -4.937370011 | 8.522846935  |
|  | C15                               | -0.656916814 | -5.246675725 | 7.323313446  |
|  | C16                               | 0.177401931  | -4.069097912 | 6.804425714  |
|  | C17                               | 0.067520184  | -1.811159068 | 5.755866580  |
|  | C18                               | -0.275639107 | -0.597644710 | 6.638215250  |
|  | C19                               | -0.315223044 | -1.639379422 | 4.269718678  |
|  | C20                               | 0.023117480  | -0.232731383 | 3.777483559  |
|  | C21                               | 0.363804255  | -2.728698667 | 3.433394890  |
|  | C22                               | -1.998371305 | 0.956519486  | 7.446002255  |

|     |               |               |              |
|-----|---------------|---------------|--------------|
| C23 | -2.025539594  | 0.635532282   | 8.952023185  |
| C24 | -3.340561600  | 1.524727198   | 6.929181869  |
| C25 | -3.815687886  | 2.693659919   | 7.800894212  |
| C26 | -3.219351465  | 1.971645311   | 5.465433524  |
| C27 | -2.723693589  | -0.879721985  | 10.714077891 |
| C28 | -1.385633723  | -0.817876385  | 11.422626883 |
| C29 | 7.192292683   | -10.219806858 | 4.882831369  |
| C30 | 7.626632021   | -8.872292560  | 4.307230635  |
| C31 | 7.433718478   | -6.408384009  | 4.693353378  |
| C32 | 8.397710678   | -5.824326368  | 5.742746712  |
| C33 | 6.094116028   | -5.653056295  | 4.659596839  |
| C34 | 6.230614381   | -4.159287817  | 4.358358091  |
| C35 | 4.881272385   | -3.557795508  | 3.956010237  |
| C36 | 4.429797118   | -1.109059174  | 4.223693467  |
| C37 | 10.486266336  | -4.597896529  | 6.098397604  |
| C38 | 10.508700501  | -3.084611759  | 6.085116718  |
| C39 | -4.361405044  | -3.472632937  | -2.393103733 |
| C40 | -5.074500232  | -2.149052968  | -2.065249412 |
| C41 | -2.856557846  | -3.309718102  | -2.112364088 |
| C42 | -2.032868104  | -4.611203929  | -2.078799497 |
| C43 | -1.466354237  | -5.066659497  | -3.421036694 |
| C44 | -6.013919384  | -0.118034918  | -3.077518177 |
| C45 | -7.433078242  | 0.007823604   | -2.515238713 |
| C46 | -5.899528605  | 0.626303463   | -4.423012978 |
| C47 | -9.316837241  | -1.126901885  | -1.450670859 |
| C48 | -9.109822550  | -0.941934412  | 0.060071085  |
| C49 | -7.524514054  | -0.933098077  | 1.937556671  |
| C50 | -6.644188183  | 0.247565441   | 2.343073412  |
| C51 | -5.319378116  | 2.197494580   | 1.650536206  |
| C52 | -6.104955907  | 3.405768856   | 2.218337942  |
| C53 | -4.572536808  | 2.714174678   | 0.409214994  |
| C54 | -3.616818116  | 1.773628547   | -0.257851411 |
| C55 | -2.827661857  | 0.734095571   | 0.175941356  |
| C56 | -2.405877745  | 1.018349364   | -1.975139095 |
| C57 | -8.230092964  | 4.657660006   | 2.094500759  |
| C58 | -8.431952437  | 4.784294997   | 3.603842681  |
| C59 | -9.584460863  | 4.462989657   | 1.373079896  |
| C60 | -10.379051021 | 5.708859125   | 1.110271329  |
| C61 | -10.627629535 | 6.809977892   | 1.908002906  |
| C62 | -11.646261472 | 7.027505491   | -0.048639226 |
| C63 | 8.064380223   | 3.020762895   | 5.063247040  |
| C64 | 9.237699267   | 2.058551459   | 5.047512397  |
| C65 | 6.820749593   | 2.214682837   | 4.605756798  |
| C66 | 5.557361112   | 3.042642132   | 4.593935367  |
| C67 | 4.758971336   | 3.172831052   | 5.745690958  |
| C68 | 5.139640315   | 3.705630294   | 3.425999944  |
| C69 | 3.584393282   | 3.932842813   | 5.735099056  |
| C70 | 3.978941353   | 4.478142137   | 3.403603738  |
| C71 | 3.197603518   | 4.585864373   | 4.557877264  |
| C72 | 4.394665633   | 8.154071637   | -0.306974744 |
| C73 | 3.172994497   | 8.929717337   | -0.818985099 |
| C74 | 4.092625780   | 6.646603335   | -0.291721877 |
| C75 | 2.131740891   | 10.055942419  | -2.732747815 |
| C76 | 0.854879605   | 9.253296021   | -2.974416926 |
| C77 | -0.211291216  | 7.050235845   | -3.196578648 |
| C78 | -0.981904087  | 6.774000633   | -1.890152747 |
| C79 | 0.226760340   | 5.757032251   | -3.908613821 |
| C80 | -0.851330831  | 4.709205221   | -4.209811005 |
| C81 | -1.867796257  | 5.033731009   | -5.320873422 |
| C82 | -3.536483644  | 6.887017662   | -5.117771223 |
| C83 | -0.905331804  | 6.402014218   | 0.530768978  |
| C84 | -1.326628316  | 7.682723349   | 1.280008851  |

|       |              |              |              |
|-------|--------------|--------------|--------------|
| C85   | -0.051077008 | 5.538056177  | 1.463714357  |
| C86   | -0.713838603 | 9.977236866  | 1.870825354  |
| C87   | -1.586144634 | 11.159436689 | 1.451984063  |
| C88   | -3.172524620 | 12.088539575 | -0.186607738 |
| C89   | -4.618425366 | 12.194821419 | 0.344225176  |
| C90   | -3.165511557 | 12.062892330 | -1.733252177 |
| C91   | -3.842412139 | 10.812691255 | -2.283303980 |
| C92   | -6.458897402 | 11.051781670 | 1.507581091  |
| C93   | -6.726295626 | 12.049985136 | 2.628835751  |
| C94   | -6.769460537 | 9.610299485  | 1.992431262  |
| C95   | -6.653211601 | 8.584232532  | 0.887774028  |
| C96   | -7.729299000 | 8.350239078  | 0.016778125  |
| C97   | -5.460670969 | 7.871983080  | 0.673302443  |
| C98   | -7.618221889 | 7.451514063  | -1.046865459 |
| C99   | -5.322624301 | 6.985879699  | -0.400217550 |
| C100  | -6.406293777 | 6.791093633  | -1.255048251 |
| C101  | 6.116590373  | -2.750338559 | -8.262689075 |
| C102  | 4.622467331  | -2.809679389 | -7.986686406 |
| C103  | 2.741901100  | -1.660984177 | -6.829213542 |
| C104  | 2.087797044  | -0.403261843 | -7.412643323 |
| C105  | 1.969414790  | 2.038099733  | -7.307038535 |
| C106  | 2.919973178  | 3.231030851  | -7.339597772 |
| C107  | 5.018151784  | 4.267127233  | -6.636290401 |
| C108  | 6.009905075  | 4.428591256  | -7.771511411 |
| C109  | -0.549513745 | -3.525249430 | -9.481101683 |
| C110  | -1.800371039 | -2.647015817 | -9.334381639 |
| C111  | -0.194697610 | -4.167075074 | -8.119102205 |
| C112  | 0.779214476  | -5.347814387 | -8.300927562 |
| C113  | 1.362059414  | -5.775820926 | -6.972678758 |
| C114  | -2.717174423 | -0.456436580 | -8.721862559 |
| C115  | -2.386628525 | 0.918070075  | -9.272486915 |
| C116  | -3.261868007 | -0.451271349 | -7.269992447 |
| C117  | -2.171336276 | -0.411991626 | -6.227497629 |
| C118  | -1.565924455 | 0.796904156  | -5.837652866 |
| C119  | -1.680390326 | -1.611245061 | -5.684550160 |
| C120  | -0.480009519 | 0.794196480  | -4.952766249 |
| C121  | -0.590482388 | -1.614086681 | -4.808334090 |
| C122  | 0.019835513  | -0.409382395 | -4.445526708 |
| C123  | 9.468157603  | -4.459171855 | -3.397316468 |
| C124  | 10.478707365 | -4.368179417 | -2.240960033 |
| C125  | 8.149718660  | -5.113620451 | -2.952376629 |
| C126  | 7.028130551  | -5.057398525 | -3.943991144 |
| C127  | 6.988041425  | -5.591378647 | -5.217496350 |
| C128  | 4.995427583  | -4.771847560 | -4.698907305 |
| C129  | 11.722247766 | -5.454215552 | -0.459372444 |
| C130  | 13.043824922 | -4.863201445 | -0.902547393 |
| C131  | 1.850350391  | -6.980106745 | -0.053330843 |
| C132  | 3.131751341  | -6.347365016 | 0.420315926  |
| C133  | 4.252365890  | -6.305209428 | -0.691544585 |
| C134  | 4.499395549  | -7.733806346 | -1.248774838 |
| C135  | 5.690928361  | -7.789969045 | -2.217440109 |
| C136  | 6.134062947  | -9.183708825 | -2.566464815 |
| C137  | 5.554216149  | -5.848150514 | 0.034559722  |
| C138  | 4.016528307  | 0.150881132  | -1.627610471 |
| Fe139 | 4.668382591  | -1.112090316 | -3.058004555 |
| Fe140 | 2.454095882  | 1.574962547  | -1.578501808 |
| Fe141 | 5.080825295  | 1.509906885  | -0.559548381 |
| Fe142 | 4.558470354  | 1.406534695  | -3.072603988 |
| Fe143 | 4.066097786  | 3.714341513  | -1.732406924 |
| Fe144 | 5.048162881  | -1.063120373 | -0.547857314 |
| Fe145 | 2.488588098  | -1.059289530 | -0.997813021 |
| H146  | -4.592444996 | -8.218475296 | -0.809761448 |

|      |              |              |               |
|------|--------------|--------------|---------------|
| H147 | -4.761591041 | -7.338080585 | -2.175463074  |
| H148 | -8.663144099 | -6.423022955 | -0.744886921  |
| H149 | -7.130064026 | -7.541714735 | -2.145922796  |
| H150 | -7.003812987 | -8.657039813 | -0.788650553  |
| H151 | -7.583043043 | -4.127553755 | 0.490398574   |
| H152 | -8.499276069 | -7.211915154 | 2.059154721   |
| H153 | -9.258299803 | -4.708232261 | 0.658379694   |
| H154 | -8.263170324 | -7.866851103 | 4.275829605   |
| H155 | -5.887233095 | -7.259657839 | 2.494393585   |
| H156 | -8.368064301 | -6.159777466 | 4.769875633   |
| H157 | -2.735836225 | -3.174306428 | 2.767424815   |
| H158 | -4.796828218 | -5.070267936 | 2.068023246   |
| H159 | -3.590846075 | -7.562255464 | 2.774145480   |
| H160 | -5.804649226 | -1.355534311 | 5.892637978   |
| H161 | -6.051244230 | -3.667165024 | 4.158314026   |
| H162 | -3.773159995 | -7.526558495 | 4.545750072   |
| H163 | -4.294957972 | -2.818141010 | 1.984319118   |
| H164 | -5.259455718 | -4.895630593 | 6.507802101   |
| H165 | -6.958379596 | -2.705689768 | 6.062223764   |
| H166 | 0.157424312  | -3.731476011 | 3.835976877   |
| H167 | 0.003011230  | -2.707565225 | 2.394672157   |
| H168 | 1.454685293  | -2.583185575 | 3.404683988   |
| H169 | -1.405816904 | -1.772623921 | 4.196416779   |
| H170 | -4.694699383 | -5.897072185 | 8.505785753   |
| H171 | -2.988845989 | 1.136720686  | 4.789005117   |
| H172 | -3.143711606 | -1.091614203 | 8.636880624   |
| H173 | -3.977693540 | 2.398721140  | 8.848008305   |
| H174 | -0.192471446 | -0.141451678 | 2.705153904   |
| H175 | 1.089624377  | -0.005737448 | 3.909142933   |
| H176 | 7.899878394  | 3.328432112  | 6.114716631   |
| H177 | -4.167151783 | 2.416787714  | 5.129264271   |
| H178 | -4.764442072 | 3.089091923  | 7.408337984   |
| H179 | -2.429649996 | 2.732593704  | 5.358504329   |
| H180 | -3.078173435 | 3.511797524  | 7.792376556   |
| H181 | -4.094702188 | 0.719048088  | 6.988821217   |
| H182 | -1.221398536 | 1.728210452  | 7.339142998   |
| H183 | -2.267366459 | -0.668830903 | 6.058377462   |
| H184 | -0.559971907 | 0.537584521  | 4.302005347   |
| H185 | 0.244474191  | 4.622830416  | 0.922455272   |
| H186 | -0.682412052 | 5.252074371  | 2.320531785   |
| H187 | 1.387520563  | 5.919922345  | 2.745527748   |
| H188 | 1.561167862  | 5.302485730  | 5.319595755   |
| H189 | 3.656380231  | 4.959893172  | 2.479064474   |
| H190 | 5.712818460  | 3.589109603  | 2.503851126   |
| H191 | 5.054571885  | 2.667794722  | 6.669856822   |
| H192 | -1.545824312 | -3.104526316 | 6.316847966   |
| H193 | -0.406708247 | -6.117073143 | 6.698211818   |
| H194 | -0.319139501 | -5.457454798 | 8.346430423   |
| H195 | -2.605152065 | -5.180996308 | 6.468197856   |
| H196 | -4.653434918 | -4.306676179 | 9.301476287   |
| H197 | 2.965807246  | 4.005850596  | 6.633318322   |
| H198 | 1.154114355  | -1.937603940 | 5.843441418   |
| H199 | -3.445775906 | -0.248275531 | 11.257097506  |
| H200 | -3.072644723 | -1.922223072 | 10.775814856  |
| H201 | -0.498199009 | -0.990794306 | 10.770543378  |
| H202 | 11.488105094 | -4.978499976 | 5.848383513   |
| H203 | 0.176676765  | -5.964765288 | -4.251440970  |
| H204 | 2.465316146  | -8.629219419 | 0.737073538   |
| H205 | 0.236828701  | -6.202087050 | -8.730115143  |
| H206 | 1.587858302  | -5.066746272 | -8.991779179  |
| H207 | -1.106373894 | -4.527853029 | -7.618905670  |
| H208 | -1.712583633 | 0.902431493  | -10.161040845 |



|      |               |              |               |
|------|---------------|--------------|---------------|
| H209 | -0.883647271  | -4.335453660 | -10.147466711 |
| H210 | -2.429813909  | -2.616839940 | -2.853175605  |
| H211 | -2.643922059  | -5.443392812 | -1.686019493  |
| H212 | -0.652551967  | -1.039592900 | -8.706669415  |
| H213 | -3.530661653  | -0.825737043 | -9.377294637  |
| H214 | 1.008180040   | -2.154285646 | -9.548344986  |
| H215 | 0.289755826   | -5.695600064 | -2.511608389  |
| H216 | 0.242012020   | -3.396756952 | -7.464938057  |
| H217 | 1.237919917   | -3.489392878 | -10.486622699 |
| H218 | -5.398097956  | -4.531071430 | -3.835839896  |
| H219 | -2.752333590  | -2.825016124 | -1.131614754  |
| H220 | 2.954901444   | -4.694442218 | -7.393353792  |
| H221 | -1.200560540  | -4.471305865 | -1.374827032  |
| H222 | -4.610310411  | 1.905230901  | 2.438432083   |
| H223 | -2.728879398  | 0.286508045  | 1.158525905   |
| H224 | -8.477094135  | -0.817346732 | 2.472166342   |
| H225 | -7.071836713  | -1.342313760 | -0.111508961  |
| H226 | -7.796303473  | 2.717016238  | 1.290662852   |
| H227 | -10.297682357 | 7.079138935  | 2.904659334   |
| H228 | -8.472363700  | 3.803221072  | 4.136573066   |
| H229 | -10.188229651 | 3.718921297  | 1.922726044   |
| H230 | -7.735455971  | 5.572168030  | 1.731029289   |
| H231 | -12.254923817 | 7.473855107  | -0.831153219  |
| H232 | -4.024779182  | 3.616374451  | 0.725822960   |
| H233 | -5.313931926  | 3.048285761  | -0.335142077  |
| H234 | -11.793185297 | 8.541756169  | 1.441568039   |
| H235 | -9.372536908  | 4.019249467  | 0.387349545   |
| H236 | -6.348925814  | 0.794729378  | 0.375639610   |
| H237 | -7.054766919  | -1.852147354 | 2.317922631   |
| H238 | -9.972552440  | -0.311984149 | -1.783407302  |
| H239 | -1.972171123  | 0.907949326  | -2.965892792  |
| H240 | -9.849473912  | -2.073573046 | -1.610581526  |
| H241 | 9.007959338   | 4.771897231  | 4.566960773   |
| H242 | 7.482295506   | 4.663483515  | 3.987962573   |
| H243 | 0.769424686   | 6.650403853  | -0.796522288  |
| H244 | -1.836197015  | 5.856950817  | 0.321534444   |
| H245 | 0.201207764   | 8.751434119  | 0.412605363   |
| H246 | -3.741623105  | 2.670007852  | -2.213364754  |
| H247 | -5.290405607  | 3.299724234  | -3.668235739  |
| H248 | -5.314882999  | 4.553911432  | -2.686633451  |
| H249 | -4.853390260  | 0.606437766  | -4.758051757  |
| H250 | -6.523522670  | 0.127964059  | -5.183972639  |
| H251 | -2.123061501  | 12.143452512 | -2.074181928  |
| H252 | -3.723301679  | 12.940695074 | -2.083657945  |
| H253 | -2.001680892  | 9.854636387  | -2.637964772  |
| H254 | -3.437427359  | 8.884235888  | -2.821020565  |
| H255 | -3.291151514  | 8.598786157  | -6.210756365  |
| H256 | -2.163325332  | 4.104444815  | -5.829282733  |
| H257 | -8.468656035  | 7.271743387  | -1.708937062  |
| H258 | -4.613603060  | 7.995227050  | 1.354577678   |
| H259 | -5.061115688  | 6.844402486  | -3.726633070  |
| H260 | 1.005231615   | 5.268726918  | -3.300176821  |
| H261 | 1.866670203   | 7.451572824  | -2.809672891  |
| H262 | -1.386851394  | 4.420321460  | -3.292546428  |
| H263 | -7.653382682  | -2.011329695 | -2.486409607  |
| H264 | 2.470104921   | 10.452540565 | -3.699465594  |
| H265 | -5.310343838  | -1.973958082 | -4.044160517  |
| H266 | 0.714078582   | 6.055292824  | -4.851659505  |
| H267 | -4.371948849  | 6.482781622  | -0.584044640  |
| H268 | -7.055383563  | 1.998307574  | -3.656057244  |
| H269 | 1.838408535   | 10.909347010 | -2.105309477  |
| H270 | -2.336259229  | 7.266060233  | -6.746307077  |

|      |              |               |              |
|------|--------------|---------------|--------------|
| H271 | -5.113808182 | 8.160863438   | -4.847559277 |
| H272 | -3.781218404 | -4.302215354  | -4.185707903 |
| H273 | -4.760367837 | -4.199899614  | -1.660504462 |
| H274 | -8.676116886 | 8.872169725   | 0.171605007  |
| H275 | -5.394431027 | 0.422789676   | -2.342417517 |
| H276 | -0.917590132 | 7.611836713   | -3.823335371 |
| H277 | -1.396741503 | 5.666000547   | -6.084385718 |
| H278 | -0.304542660 | 3.812453734   | -4.534169597 |
| H279 | -3.688065813 | 5.080283121   | -4.206094943 |
| H280 | -1.092055826 | 9.645069175   | 2.849481730  |
| H281 | -2.280863630 | 10.130350275  | -0.183955390 |
| H282 | -2.681600165 | 13.017138142  | 0.140059623  |
| H283 | 0.301296582  | 10.370701353  | 2.016791362  |
| H284 | -4.448599464 | 10.354381619  | 1.215058355  |
| H285 | 6.445329668  | -1.701942810  | -8.300856629 |
| H286 | 6.603076965  | -3.206068014  | -7.375198349 |
| H287 | 9.266099550  | -3.416012154  | -3.681991831 |
| H288 | 7.441100161  | -3.561936006  | -9.583440883 |
| H289 | 6.002045440  | -4.343433748  | -9.526093835 |
| H290 | 4.987172283  | 6.141062649   | 0.094356852  |
| H291 | 3.950100661  | 8.568816449   | 1.631804957  |
| H292 | 4.028240031  | 9.067952855   | -2.681087263 |
| H293 | 3.255704119  | 6.450918913   | 0.396883304  |
| H294 | 5.115619732  | 9.539450076   | 1.022291195  |
| H295 | 5.567593757  | 4.201295708   | -5.684700384 |
| H296 | 5.242786166  | 8.331564985   | -0.986034933 |
| H297 | 5.578593715  | -5.803595685  | 5.622418881  |
| H298 | 7.896876957  | -6.372405486  | 3.700006680  |
| H299 | 4.408607933  | 2.263962146   | -6.259655893 |
| H300 | 4.167131995  | 0.922935277   | 4.157894697  |
| H301 | 1.586928947  | 1.895957793   | -8.325787567 |
| H302 | -0.212743507 | -2.555824578  | -4.405271893 |
| H303 | 1.111496937  | 2.356205234   | -6.691520305 |
| H304 | 4.137145879  | -3.672848401  | 4.755923913  |
| H305 | 3.080148186  | 0.697995339   | -6.004258899 |
| H306 | 4.482898343  | -4.093913549  | 3.080948453  |
| H307 | 5.482409659  | -6.135469336  | 3.880332159  |
| H308 | 6.932253417  | -3.997827352  | 3.526001296  |
| H309 | 6.629805978  | -3.619219047  | 5.232162461  |
| H310 | -3.865008186 | -1.361099765  | -7.138829453 |
| H311 | 6.696011777  | -8.054077458  | 5.872412335  |
| H312 | 6.416415193  | -10.600945896 | 4.201700632  |
| H313 | 0.873921345  | -0.405306235  | -3.765387153 |
| H314 | 7.380976282  | -10.253715227 | 6.933528061  |
| H315 | 5.961922984  | -10.873297449 | 6.398381782  |
| H316 | 5.388605309  | -1.947503096  | 2.664021383  |
| H317 | 0.000422338  | 1.729259293   | -4.653584760 |
| H318 | -2.151432989 | -2.559445240  | -5.954467750 |
| H319 | 9.460370645  | -8.182295531  | -0.249920657 |
| H320 | 8.347748711  | -6.173103476  | -2.708926165 |
| H321 | 7.810442145  | -6.827039512  | 0.984752489  |
| H322 | 9.051914571  | -8.981394139  | -1.505066063 |
| H323 | 5.895070243  | 3.703509363   | -8.613510924 |
| H324 | 7.119657361  | -3.759302761  | 0.739434143  |
| H325 | 3.524549441  | -6.871075847  | 1.304198282  |
| H326 | 4.775379991  | -1.102360687  | -6.856932762 |
| H327 | 4.688139361  | -8.409430181  | -0.400813099 |
| H328 | 5.324946943  | -5.712945864  | -6.564444488 |
| H329 | 3.945633259  | -4.517428504  | -4.784928719 |
| H330 | 8.057995836  | -10.897052314 | 4.785526209  |
| H331 | 4.837293101  | 0.210952140   | 2.692295439  |
| H332 | 9.110985380  | -4.151447941  | 2.042649241  |

|       |              |               |              |
|-------|--------------|---------------|--------------|
| H333  | 7.686644989  | -2.323290408  | 0.898485438  |
| H334  | 9.575125283  | -5.068838264  | 4.201551362  |
| H335  | 4.092214380  | -2.062362886  | 6.017423444  |
| H336  | 5.524864797  | -10.821243152 | -3.292045380 |
| H337  | 5.421235836  | -7.266627710  | -3.147106329 |
| H338  | 6.564945460  | -7.288036162  | -1.788855692 |
| H339  | 3.589989498  | -8.071791921  | -1.765858223 |
| H340  | 2.714508304  | -1.644574917  | -5.727576646 |
| H341  | -1.932427737 | 1.737243217   | -6.257663232 |
| H342  | -3.931571548 | 0.418566779   | -7.183019657 |
| H343  | 2.920786807  | -5.301262935  | 0.681828303  |
| H344  | 9.476508956  | -5.654008089  | 1.926183557  |
| H345  | 8.643959994  | -7.735383839  | 1.921294182  |
| H346  | 3.503321934  | -0.450717815  | 5.927685450  |
| H347  | 7.754128031  | -6.077947530  | -5.811285156 |
| H348  | 7.811140817  | -4.640982934  | -2.020679230 |
| H349  | 2.184401057  | -2.526391362  | -7.193805961 |
| H350  | 4.403751760  | 5.180711149   | -6.601186775 |
| H351  | 6.707184168  | 1.362803174   | 5.293353335  |
| H352  | 7.011652619  | 1.811158608   | 3.598243091  |
| H353  | 10.868767379 | -4.617261337  | -4.887577543 |
| H354  | 10.377872648 | -6.067653587  | -4.312659509 |
| H355  | 11.917617939 | -6.489243070  | -0.137266958 |
| H356  | 10.262934498 | -6.387225549  | -1.699759703 |
| H357  | 13.274527445 | -4.987481992  | -1.987740857 |
| H358  | 11.341139721 | -4.895928978  | 0.410073881  |
| H359  | 9.719427695  | 1.941672877   | 4.046946161  |
| H360  | -5.815291012 | 12.427247762  | 3.150421635  |
| H361  | 10.254751145 | -4.908190445  | 7.132361665  |
| H362  | 9.551224329  | -2.597438615  | 5.777915956  |
| H363  | -7.133889774 | 11.306027427  | 0.674030622  |
| H364  | -6.084499140 | 9.359733939   | 2.818536504  |
| H365  | -7.787878531 | 9.618346303   | 2.406638239  |
| H366  | -7.097583977 | 5.841800157   | -2.807208643 |
| H367  | 0.134257300  | -1.994926303  | 0.454332277  |
| H368  | -1.291884008 | -0.455513307  | -0.888404934 |
| H369  | 1.709087046  | 0.086238823   | -1.911313389 |
| Mo370 | 4.753341814  | -3.515818512  | -1.745842967 |
| N371  | 2.011132850  | 0.271063810   | 1.565952554  |
| N372  | 2.177168090  | -0.200122038  | 0.557546226  |
| N373  | -5.174664485 | -8.107512001  | -1.643739202 |
| N374  | -7.938493344 | -6.127222615  | -0.095843815 |
| N375  | -8.148235955 | -6.508224511  | 2.704070844  |
| N376  | -5.522677562 | -7.165946140  | 3.441320347  |
| N377  | -4.161141958 | -4.729233517  | 2.790971567  |
| N378  | -5.442041344 | -3.028522105  | 4.675015208  |
| N379  | -4.873531375 | -4.270934387  | 7.220780908  |
| N380  | -2.098364761 | -5.055314433  | 7.350261073  |
| N381  | -0.531280369 | -3.017201683  | 6.323707560  |
| N382  | -1.583845258 | -0.210104589  | 6.664010493  |
| N383  | -2.618166183 | -0.530957401  | 9.310406060  |
| N384  | 6.640696264  | -10.127262633 | 6.239823864  |
| N385  | 7.194821040  | -7.809792778  | 5.009830901  |
| N386  | 4.984344349  | -2.146122768  | 3.583732235  |
| N387  | 3.845060823  | -1.269719922  | 5.434098366  |
| N388  | 4.404645053  | 0.088285175   | 3.630201516  |
| N389  | 9.470536668  | -5.168016531  | 5.234555642  |
| N390  | -4.628959494 | -3.859840476  | -3.784506207 |
| N391  | -0.246068495 | -5.633921792  | -3.378981926 |
| N392  | -5.514362091 | -1.474353567  | -3.162261623 |
| N393  | -8.097733006 | -1.131134396  | -2.23598285  |
| N394  | -7.829960456 | -1.063075269  | 0.522765141  |

|      |               |              |               |
|------|---------------|--------------|---------------|
| N395 | -6.174107473  | 1.056431247  | 1.342911666   |
| N396 | -3.335337761  | 1.921016262  | -1.610553290  |
| N397 | -2.096234850  | 0.283625541  | -0.904634078  |
| N398 | -7.398020535  | 3.492925270  | 1.814038767   |
| N399 | -11.022646012 | 5.856954088  | -0.107917592  |
| N400 | -11.431026210 | 7.637464390  | 1.151209621   |
| N401 | 8.339077385   | 4.125198268  | 4.142219435   |
| N402 | 4.790458289   | 8.568807904  | 1.044552900   |
| N403 | 3.227809692   | 9.339384914  | -2.115789428  |
| N404 | 0.958355985   | 7.905015215  | -3.002672921  |
| N405 | -3.107364986  | 5.657906765  | -4.841784972  |
| N406 | -2.916854288  | 7.674076998  | -6.021547649  |
| N407 | -4.573767173  | 7.410435433  | -4.424832065  |
| N408 | -0.250519452  | 6.645966208  | -0.749893360  |
| N409 | -0.649777856  | 8.828844071  | 0.977858065   |
| N410 | -2.402492044  | 10.979263130 | 0.370920512   |
| N411 | -3.014531328  | 9.753801406  | -2.497498960  |
| N412 | -5.078465921  | 11.136736144 | 1.055041098   |
| N413 | 6.430889629   | -3.413531122 | -9.531321501  |
| N414 | 4.125728506   | -1.782100828 | -7.273369389  |
| N415 | 2.480688316   | 0.759893431  | -6.846915193  |
| N416 | 4.150972220   | 3.109503243  | -6.777828777  |
| N417 | 0.534055090   | -2.817947220 | -10.173340267 |
| N418 | -1.597227956  | -1.355957846 | -8.947606652  |
| N419 | 10.042185785  | -5.135958088 | -4.576414708  |
| N420 | 5.768432167   | -4.543308843 | -3.641811946  |
| N421 | 5.700258761   | -5.401435754 | -5.672265323  |
| N422 | 10.760579211  | -5.508124142 | -1.548864023  |
| N423 | -0.168069626  | 2.762473543  | -0.957983656  |
| N424 | 0.820079875   | 2.254505115  | -1.184961423  |
| O425 | -5.731234056  | -6.222146320 | 0.457789831   |
| O426 | -7.527499631  | -4.333980179 | 2.990879784   |
| O427 | -6.003464112  | -6.552785655 | 5.590973364   |
| O428 | -2.743043317  | -5.233259112 | 4.496362061   |
| O429 | -3.558190250  | -1.754602484 | 4.680063704   |
| O430 | -4.778042030  | -2.144293656 | 8.052163627   |
| O431 | -2.245368878  | -4.923342499 | 9.638027241   |
| O432 | 1.415506910   | -4.133806849 | 6.823115406   |
| O433 | 0.601008028   | -0.012772911 | 7.291893023   |
| O434 | -1.529081426  | 1.400742896  | 9.795144044   |
| O435 | -1.275114687  | -0.668875987 | 12.630845955  |
| O436 | 8.295172874   | -8.839861070 | 3.252175969   |
| O437 | 8.178479669   | -5.973669271 | 6.958191206   |
| O438 | 11.485369301  | -2.426164513 | 6.402870779   |
| O439 | -5.241655140  | -1.733383862 | -0.899846469  |
| O440 | -2.099562883  | -4.939066595 | -4.494819081  |
| O441 | -7.900157753  | 1.144688717  | -2.287676307  |
| O442 | -6.290028932  | 2.001918261  | -4.287629371  |
| O443 | -10.088242506 | -0.708586560 | 0.778625834   |
| O444 | -6.393075418  | 0.450136727  | 3.533717891   |
| O445 | -5.544496294  | 4.261559869  | 2.909821978   |
| O446 | -8.576056906  | 5.841137396  | 4.193544323   |
| O447 | 9.625978797   | 1.429300436  | 6.021272831   |
| O448 | 2.043055865   | 5.338979953  | 4.472769776   |
| O449 | 2.182820301   | 9.163047059  | -0.100401253  |
| O450 | -0.213588444  | 9.870050470  | -3.160237234  |
| O451 | -2.219289872  | 6.672857408  | -1.908816429  |
| O452 | -2.221911337  | 7.628227504  | 2.134539649   |
| O453 | 1.091351059   | 6.285618345  | 1.886660382   |
| O454 | -1.557194692  | 12.208148044 | 2.107728136   |
| O455 | -5.301061210  | 13.203346923 | 0.118543913   |
| O456 | -5.072417324  | 10.746456585 | -2.432000629  |

|                    |                                   |              |              |              |
|--------------------|-----------------------------------|--------------|--------------|--------------|
|                    | O457                              | -7.847941199 | 12.393929598 | 2.962619040  |
|                    | O458                              | -6.237130031 | 5.929119659  | -2.352672129 |
|                    | O459                              | 3.937628768  | -3.788667215 | -8.381719949 |
|                    | O460                              | 1.270761132  | -0.468487858 | -8.356466968 |
|                    | O461                              | 2.513653848  | 4.284903598  | -7.856029487 |
|                    | O462                              | 6.872358852  | 5.292677529  | -7.784244368 |
|                    | O463                              | -2.936948824 | -3.105394700 | -9.536285815 |
|                    | O464                              | 0.777430885  | -6.504851665 | -6.176817348 |
|                    | O465                              | 2.572406527  | -5.270170657 | -6.658651993 |
|                    | O466                              | -2.834173235 | 1.967541120  | -8.835137032 |
|                    | O467                              | 11.077999208 | -3.307583796 | -1.983644703 |
|                    | O468                              | 13.848630755 | -4.356787760 | -0.134373655 |
|                    | O469                              | 0.962006669  | -6.419593800 | -0.675345440 |
|                    | O470                              | 1.690453671  | -8.313431207 | 0.233651275  |
|                    | O471                              | 7.268856344  | -9.630007740 | -2.412423189 |
|                    | O472                              | 5.138699034  | -9.940188751 | -3.098281524 |
|                    | O473                              | 6.027045946  | -4.707677416 | -0.356908744 |
|                    | O474                              | 6.089266527  | -6.578479528 | 0.898994258  |
|                    | O475                              | 3.899810167  | -5.423544024 | -1.695860714 |
|                    | O476                              | 9.740035180  | -4.824758313 | 2.406318429  |
|                    | O477                              | 7.660842509  | -3.191137586 | 1.346071638  |
|                    | O478                              | -4.713632706 | 3.954927345  | -3.188387888 |
|                    | O479                              | 9.844809267  | -8.658708174 | -1.028713274 |
|                    | O480                              | 8.750077661  | -7.120971621 | 1.148316361  |
|                    | S481                              | 3.680887929  | 5.971560728  | -1.969048769 |
|                    | S482                              | 2.776887531  | 2.773410416  | -3.415896161 |
|                    | S483                              | 2.914860384  | -2.513360981 | -2.961184186 |
|                    | S484                              | 3.403363737  | 2.837638436  | 0.179356353  |
|                    | S485                              | 0.248222117  | -1.871539603 | -0.894679047 |
|                    | S486                              | 5.090522919  | 0.183938925  | -4.837622535 |
|                    | S487                              | 3.647973337  | -2.633673245 | 0.213061738  |
|                    | S488                              | 6.128420247  | 2.748891258  | -2.098812349 |
|                    | S489                              | 6.496655316  | -1.935574973 | -2.012725320 |
|                    | S490                              | 6.160335840  | 0.208272785  | 0.885920459  |
| <b>17, 47(5/2)</b> | <b>bm12unh2b2n2x2n2n3b2.car_3</b> |              |              |              |
| <b>Fe1</b>         | <b>3.18</b>                       |              |              |              |
| <b>Fe2</b>         | <b>-0.27</b>                      |              |              |              |
| <b>Fe3</b>         | <b>2.68</b>                       |              |              |              |
| <b>Fe4</b>         | <b>-2.75</b>                      |              |              |              |
| <b>Fe5</b>         | <b>2.06</b>                       |              |              |              |
| <b>Fe6</b>         | <b>2.12</b>                       |              |              |              |
| <b>Fe7</b>         | <b>-2.43</b>                      |              |              |              |
|                    | C1                                | -6.976749116 | -5.106928510 | -3.954237666 |
|                    | C2                                | -6.757824330 | -5.687284291 | -5.354182325 |
|                    | C3                                | -8.516392759 | -3.920924497 | -2.451760209 |
|                    | C4                                | -8.451838290 | -4.843021495 | -1.236519354 |
|                    | C5                                | -8.698790790 | -7.107759455 | -0.353529789 |
|                    | C6                                | -7.268957251 | -7.382256423 | 0.126760770  |
|                    | C7                                | -4.889503733 | -7.405251648 | -0.462693317 |
|                    | C8                                | -4.351890697 | -6.186663373 | 0.294563118  |
|                    | C9                                | -4.364165376 | -3.761359406 | 0.557651279  |
|                    | C10                               | -4.930158851 | -3.690393627 | 1.984178996  |
|                    | C11                               | -6.777483256 | -4.143797669 | 3.488821331  |
|                    | C12                               | -6.204756969 | -5.218026609 | 4.425045079  |
|                    | C13                               | -5.735563894 | -7.600465169 | 4.742348417  |
|                    | C14                               | -4.243167157 | -7.885491855 | 4.948119293  |
|                    | C15                               | -1.994974265 | -7.865553742 | 3.948120383  |
|                    | C16                               | -1.028720684 | -6.689169937 | 4.127818183  |
|                    | C17                               | -0.852685477 | -4.210889803 | 4.291459683  |
|                    | C18                               | -1.259122732 | -3.520335264 | 5.604894461  |
|                    | C19                               | -0.990491644 | -3.297589101 | 3.051197623  |
|                    | C20                               | -0.448783310 | -1.895874764 | 3.344615195  |
|                    | C21                               | -0.316873239 | -3.945216483 | 1.836940816  |
|                    | C22                               | -2.974165345 | -2.266420181 | 6.833179143  |
|                    | C23                               | -3.249012138 | -3.207488655 | 8.017669262  |
|                    | C24                               | -4.182328306 | -1.364520114 | 6.482837162  |
|                    | C25                               | -4.738389120 | -0.668966954 | 7.730567338  |

|     |               |               |              |
|-----|---------------|---------------|--------------|
| C26 | -3.792330804  | -0.323837746  | 5.423021285  |
| C27 | -4.272151653  | -5.256219575  | 8.811812700  |
| C28 | -3.056817359  | -5.670753715  | 9.615799721  |
| C29 | 5.947836859   | -12.068596504 | 0.481851745  |
| C30 | 6.475934115   | -10.637987300 | 0.585662079  |
| C31 | 6.345522241   | -8.576940562  | 1.994119296  |
| C32 | 7.175829407   | -8.627472025  | 3.290795911  |
| C33 | 5.074816875   | -7.722779559  | 2.158665730  |
| C34 | 5.357561396   | -6.277232243  | 2.577286977  |
| C35 | 4.122241843   | -5.393675829  | 2.388797765  |
| C36 | 3.776710172   | -3.265652684  | 3.668337745  |
| C37 | 9.258129402   | -7.938958681  | 4.381402727  |
| C38 | 9.355457853   | -6.594117523  | 5.069665790  |
| C39 | -4.241329098  | -1.516275558  | -4.175199461 |
| C40 | -4.936800500  | -0.443287290  | -3.315156731 |
| C41 | -2.780692559  | -1.643446131  | -3.696948656 |
| C42 | -2.021692121  | -2.894532123  | -4.181547893 |
| C43 | -1.284344415  | -2.744587184  | -5.510323745 |
| C44 | -5.523746678  | 1.967339711   | -3.261609945 |
| C45 | -6.973652224  | 1.942509507   | -2.768950928 |
| C46 | -5.186688552  | 3.176689205   | -4.180830224 |
| C47 | -9.092462698  | 0.712091672   | -2.765331741 |
| C48 | -9.087804632  | 0.145567925   | -1.337499649 |
| C49 | -7.788032685  | -0.895793320  | 0.467874182  |
| C50 | -6.933140328  | -0.101695437  | 1.459328251  |
| C51 | -5.428475326  | 1.787258073   | 1.884194196  |
| C52 | -6.243258167  | 2.648655529   | 2.872745386  |
| C53 | -4.524954918  | 2.754105431   | 1.098989747  |
| C54 | -3.545452532  | 2.167244236   | 0.126795339  |
| C55 | -2.905763809  | 0.945359326   | 0.083641170  |
| C56 | -2.207936193  | 2.211935599   | -1.587869455 |
| C57 | -8.246330786  | 4.078514597   | 3.093702061  |
| C58 | -8.695087414  | 3.529358222   | 4.445334750  |
| C59 | -9.468529665  | 4.400994183   | 2.202450520  |
| C60 | -10.164472843 | 5.703108269   | 2.469950020  |
| C61 | -10.504649627 | 6.324583316   | 3.656450015  |
| C62 | -11.165286246 | 7.545649933   | 1.929307830  |
| C63 | 7.331176033   | -0.478032443  | 6.644591845  |
| C64 | 8.421955828   | -1.475909678  | 6.306181821  |
| C65 | 6.109793690   | -0.824619439  | 5.756718435  |
| C66 | 4.909263656   | 0.046688082   | 6.045427903  |
| C67 | 3.950624906   | -0.323378784  | 7.007935950  |
| C68 | 4.711734749   | 1.253658372   | 5.350054109  |
| C69 | 2.832626204   | 0.478055029   | 7.268389989  |
| C70 | 3.612002422   | 2.070739596   | 5.609961225  |
| C71 | 2.669554739   | 1.679832538   | 6.566123499  |
| C72 | 4.709995623   | 6.883529400   | 3.944242443  |
| C73 | 3.646567686   | 7.966349225   | 3.728445559  |
| C74 | 4.230256911   | 5.554030133   | 3.340174969  |
| C75 | 2.968888665   | 9.927743165   | 2.419548548  |
| C76 | 1.702940414   | 9.489504691   | 1.680872826  |
| C77 | 0.562483204   | 7.727815730   | 0.389941022  |
| C78 | -0.378575065  | 6.985124236   | 1.361036807  |
| C79 | 1.022803461   | 6.848762531   | -0.787316932 |
| C80 | -0.066120118  | 6.201830683   | -1.652083698 |
| C81 | -0.884722052  | 7.133353243   | -2.565735757 |
| C82 | -2.521274392  | 8.812648884   | -1.708258001 |
| C83 | -0.650362824  | 5.510928487   | 3.286331690  |
| C84 | -1.133049225  | 6.379609439   | 4.465073047  |
| C85 | 0.013942224   | 4.251238436   | 3.853063073  |
| C86 | -0.489073111  | 8.066295941   | 6.115870868  |
| C87 | -1.247003796  | 9.387279349   | 6.217730252  |

|       |              |              |               |
|-------|--------------|--------------|---------------|
| C88   | -2.527071494 | 11.139250601 | 5.054335536   |
| C89   | -4.021793799 | 11.139181550 | 5.441482275   |
| C90   | -2.317561836 | 11.819113101 | 3.682017958   |
| C91   | -2.978017239 | 11.028335157 | 2.558308186   |
| C92   | -6.058684039 | 9.793613079  | 5.729094359   |
| C93   | -6.427338105 | 10.167223427 | 7.160123906   |
| C94   | -6.510815293 | 8.335758877  | 5.437911405   |
| C95   | -6.279967937 | 7.919974627  | 4.002085125   |
| C96   | -7.219224886 | 8.234406232  | 3.007142707   |
| C97   | -5.112832795 | 7.238869506  | 3.617766877   |
| C98   | -6.998492285 | 7.898962213  | 1.668679429   |
| C99   | -4.863466534 | 6.914225992  | 2.280666067   |
| C100  | -5.814748871 | 7.246181331  | 1.315740651   |
| C101  | 7.098061751  | 0.694232318  | -7.935379132  |
| C102  | 5.579172882  | 0.663758397  | -7.883970325  |
| C103  | 3.587370588  | 1.397696885  | -6.593027630  |
| C104  | 3.070168591  | 2.839503989  | -6.603272851  |
| C105  | 3.023277053  | 4.956970903  | -5.372100365  |
| C106  | 3.984407906  | 5.902536710  | -4.658395382  |
| C107  | 5.979588136  | 6.235084901  | -3.284344907  |
| C108  | 7.159879777  | 6.770218151  | -4.070358807  |
| C109  | 0.616480073  | 1.215277719  | -10.108792747 |
| C110  | -0.600166370 | 2.056365266  | -9.701647312  |
| C111  | 0.764229435  | 0.014615173  | -9.144998931  |
| C112  | 1.720509451  | -1.047349209 | -9.717671090  |
| C113  | 2.067800773  | -2.083526272 | -8.669874319  |
| C114  | -1.493715679 | 3.811539155  | -8.241686194  |
| C115  | -1.039444329 | 5.245209626  | -8.044235988  |
| C116  | -2.226911789 | 3.193316859  | -7.026245393  |
| C117  | -1.282256920 | 2.690209836  | -5.963509830  |
| C118  | -0.724416465 | 3.558907990  | -5.010408577  |
| C119  | -0.889005153 | 1.341702174  | -5.954304952  |
| C120  | 0.217733461  | 3.086089331  | -4.091639574  |
| C121  | 0.056143328  | 0.871332756  | -5.037297659  |
| C122  | 0.620547079  | 1.747761348  | -4.106399701  |
| C123  | 9.726370274  | -3.397216045 | -3.993296806  |
| C124  | 10.552100140 | -3.950669493 | -2.819171211  |
| C125  | 8.356401747  | -4.083308148 | -4.115558501  |
| C126  | 7.414525861  | -3.495558283 | -5.122091070  |
| C127  | 7.572157362  | -3.459889222 | -6.492955528  |
| C128  | 5.558743340  | -2.701937185 | -5.965935257  |
| C129  | 11.423808917 | -5.867366902 | -1.597988687  |
| C130  | 12.847111705 | -5.356185333 | -1.628693646  |
| C131  | 1.594569944  | -6.321078657 | -3.125139648  |
| C132  | 2.832138061  | -6.078857681 | -2.304948452  |
| C133  | 4.091533754  | -5.658891226 | -3.164537965  |
| C134  | 4.333257109  | -6.727692431 | -4.267393031  |
| C135  | 5.639115582  | -6.494638374 | -5.045072097  |
| C136  | 6.045886851  | -7.665798379 | -5.894359612  |
| C137  | 5.315656006  | -5.715837748 | -2.196726041  |
| C138  | 4.144744217  | 0.363558835  | -1.005720347  |
| Fe139 | 5.037596707  | -0.039180721 | -2.794168217  |
| Fe140 | 2.527324833  | 1.202479108  | 0.033177358   |
| Fe141 | 5.049375654  | 1.015525195  | 0.671584143   |
| Fe142 | 4.831820408  | 2.176734823  | -1.610597363  |
| Fe143 | 4.151471556  | 3.611517594  | 0.512189025   |
| Fe144 | 5.199702621  | -1.242179715 | -0.524646073  |
| Fe145 | 2.856288233  | -0.981451846 | -1.807329565  |
| H146  | -4.886690133 | -6.412919663 | -4.996517659  |
| H147  | -4.888408118 | -5.008690070 | -5.829142151  |
| H148  | -8.847933628 | -4.445352406 | -4.497806670  |
| H149  | -7.251303770 | -5.046077045 | -6.101293262  |

|      |              |              |               |
|------|--------------|--------------|---------------|
| H150 | -7.293855985 | -6.653073908 | -5.377831624  |
| H151 | -7.820708892 | -3.093306334 | -2.251240589  |
| H152 | -9.063460290 | -6.443276206 | -2.367932373  |
| H153 | -9.531041598 | -3.505562341 | -2.519001612  |
| H154 | -9.144358671 | -8.052475070 | -0.692902053  |
| H155 | -6.528848251 | -6.902196151 | -1.727490162  |
| H156 | -9.265617037 | -6.754971149 | 0.518143116   |
| H157 | -3.271831445 | -3.697805818 | 0.648666164   |
| H158 | -5.304554282 | -4.899643950 | -1.011247480  |
| H159 | -4.311461971 | -7.547664303 | -1.385918697  |
| H160 | -6.608369394 | -3.170142128 | 3.965854557   |
| H161 | -6.763999412 | -4.420255382 | 1.353145377   |
| H162 | -4.732844631 | -8.277124139 | 0.183099341   |
| H163 | -4.709392195 | -2.895273712 | -0.025753833  |
| H164 | -6.409590449 | -6.657413109 | 2.949779054   |
| H165 | -7.860038480 | -4.304389354 | 3.393689305   |
| H166 | -0.721237341 | -4.951088974 | 1.648133161   |
| H167 | -0.488626033 | -3.337296745 | 0.935890742   |
| H168 | 0.771472905  | -4.022633518 | 1.977989591   |
| H169 | -2.065677690 | -3.206134034 | 2.831826707   |
| H170 | -6.184159651 | -8.502709806 | 4.301230536   |
| H171 | -3.484950402 | -0.784996998 | 4.473930310   |
| H172 | -4.363984326 | -4.494365990 | 6.822422388   |
| H173 | -5.081028261 | -1.383828215 | 8.492124211   |
| H174 | -0.533025925 | -1.262217640 | 2.451426392   |
| H175 | 0.613682515  | -1.922894282 | 3.622926404   |
| H176 | 7.040620558  | -0.651328593 | 7.699675169   |
| H177 | -4.644822820 | 0.336932215  | 5.209343332   |
| H178 | -5.591659441 | -0.034767056 | 7.448366286   |
| H179 | -2.960272102 | 0.301376798  | 5.786532215   |
| H180 | -3.973618494 | -0.024837278 | 8.193425499   |
| H181 | -4.974225692 | -2.012257198 | 6.064816034   |
| H182 | -2.141515464 | -1.630284405 | 7.171567530   |
| H183 | -3.120792189 | -3.036227980 | 4.828779998   |
| H184 | -1.005110597 | -1.404757291 | 4.155301852   |
| H185 | 0.421555907  | 3.657376197  | 3.016650716   |
| H186 | -0.776701205 | 3.664398454  | 4.347546144   |
| H187 | 1.172834935  | 3.863578516  | 5.390916372   |
| H188 | 0.963180938  | 2.107121979  | 7.389096408   |
| H189 | 3.458524273  | 2.986114714  | 5.038507208   |
| H190 | 5.405908284  | 1.542915715  | 4.558467039   |
| H191 | 4.071369951  | -1.260486875 | 7.558757428   |
| H192 | -2.603683313 | -5.408070549 | 3.990724354   |
| H193 | -1.713741175 | -8.370264929 | 3.011579281   |
| H194 | -1.814013869 | -8.562585542 | 4.777236549   |
| H195 | -3.794570886 | -7.180687292 | 3.046160219   |
| H196 | -6.164307567 | -7.458991761 | 5.743169701   |
| H197 | 2.086658672  | 0.163508438  | 8.002883033   |
| H198 | 0.198922946  | -4.498393841 | 4.425609029   |
| H199 | -5.027807252 | -4.842270564 | 9.499579374   |
| H200 | -4.690077235 | -6.169893988 | 8.359229400   |
| H201 | -2.090827309 | -5.645314709 | 9.060296797   |
| H202 | 10.266065605 | -8.265844061 | 4.083535394   |
| H203 | 0.445087958  | -3.294989713 | -6.462931270  |
| H204 | 2.002072282  | -8.205116932 | -3.038212711  |
| H205 | 1.229276594  | -1.561660628 | -10.556645043 |
| H206 | 2.638688751  | -0.571461152 | -10.092468219 |
| H207 | -0.217708169 | -0.449042835 | -8.964585857  |
| H208 | -0.232721827 | 5.571349964  | -8.743615966  |
| H209 | 0.334237370  | 0.813119217  | -11.094147480 |
| H210 | -2.234857630 | -0.733343239 | -3.987888887  |
| H211 | -2.723918245 | -3.739165115 | -4.299957702  |



|      |               |              |               |
|------|---------------|--------------|---------------|
| H212 | 0.523296788   | 3.085025493  | -8.294274970  |
| H213 | -2.222946248  | 3.869078414  | -9.075195296  |
| H214 | 2.214316964   | 2.336036615  | -9.404797316  |
| H215 | 0.333692768   | -3.839537034 | -4.791796047  |
| H216 | 1.122287141   | 0.381993455  | -8.171330093  |
| H217 | 2.529365397   | 1.506801477  | -10.791079182 |
| H218 | -5.120336973  | -1.630745890 | -6.042468339  |
| H219 | -2.795777448  | -1.665842539 | -2.598564911  |
| H220 | 3.768813363   | -1.132116292 | -8.373029413  |
| H221 | -1.301740521  | -3.190881033 | -3.406121264  |
| H222 | -4.827384015  | 1.100119117  | 2.496813369   |
| H223 | -2.960609394  | 0.069216209  | 0.719872420   |
| H224 | -8.796606901  | -0.959080656 | 0.897906350   |
| H225 | -7.075205997  | -0.375337817 | -1.477591397  |
| H226 | -7.766991905  | 2.719722686  | 1.505888121   |
| H227 | -10.337809436 | 6.058634751  | 4.694788428   |
| H228 | -8.879987485  | 2.427390429  | 4.445593907   |
| H229 | -10.177912481 | 3.555451788  | 2.244274945   |
| H230 | -7.649698333  | 4.988508208  | 3.266411241   |
| H231 | -11.615158954 | 8.368975395  | 1.381234149   |
| H232 | -3.982518045  | 3.353244304  | 1.850340761   |
| H233 | -5.165976326  | 3.462252919  | 0.547060492   |
| H234 | -11.506813225 | 8.194205345  | 3.928660351   |
| H235 | -9.111155864  | 4.449903079  | 1.162680650   |
| H236 | -6.319516576  | 1.235063087  | 0.003341431   |
| H237 | -7.389405657  | -1.920531054 | 0.440010695   |
| H238 | -9.724894977  | 1.610252923  | -2.738355923  |
| H239 | -1.641703890  | 2.514281209  | -2.465201860  |
| H240 | -9.588287509  | -0.023013334 | -3.415001668  |
| H241 | 8.453235051   | 1.171762115  | 7.106049594   |
| H242 | 7.026288861   | 1.530132099  | 6.394907178   |
| H243 | 1.203981991   | 6.020829541  | 2.292455239   |
| H244 | -1.560303269  | 5.198297798  | 2.754779900   |
| H245 | 0.565838352   | 7.530310724  | 4.367798318   |
| H246 | -3.635074767  | 4.552411456  | -1.292785484  |
| H247 | -4.953510567  | 4.686613462  | -2.899517494  |
| H248 | -4.626704984  | 5.731587746  | -0.860922152  |
| H249 | -4.102893168  | 3.105375025  | -4.386671029  |
| H250 | -5.728021711  | 3.059406021  | -5.135386950  |
| H251 | -1.237126930  | 11.935454380 | 3.514496069   |
| H252 | -2.780507608  | 12.813462901 | 3.725593628   |
| H253 | -1.138819035  | 10.201964363 | 1.941491426   |
| H254 | -2.580693443  | 9.537924403  | 1.213400911   |
| H255 | -2.085131096  | 10.809928960 | -1.855522048  |
| H256 | -1.127911088  | 6.614335787  | -3.504223633  |
| H257 | -7.748928803  | 8.137291703  | 0.911454374   |
| H258 | -4.374754003  | 6.938155091  | 4.366476972   |
| H259 | -4.203853731  | 8.266662372  | -0.651686910  |
| H260 | 1.658149847   | 6.037998567  | -0.395924664  |
| H261 | 2.545882326   | 7.661870356  | 1.201163630   |
| H262 | -0.749495028  | 5.593521569  | -1.039275388  |
| H263 | -7.396708496  | 0.389404053  | -4.034270135  |
| H264 | 3.479124481   | 10.676823653 | 1.798222942   |
| H265 | -4.791623387  | 0.724190432  | -4.923512113  |
| H266 | 1.669725443   | 7.473518359  | -1.426198117  |
| H267 | -3.928210955  | 6.431372538  | 1.991136875   |
| H268 | 2.630150102   | 10.425719434 | 3.338637262   |
| H269 | -1.130507175  | 9.792428381  | -2.872664820  |
| H270 | -4.091894393  | 9.944999820  | -1.052552211  |
| H271 | -3.457935099  | -1.492254909 | -6.077708264  |
| H272 | -4.758079476  | -2.462405032 | -3.924746572  |
| H273 | -8.145230885  | 8.745569082  | 3.280529758   |

|      |              |               |              |
|------|--------------|---------------|--------------|
| H274 | -4.925726592 | 2.065924452   | -2.342972928 |
| H275 | -0.030824599 | 8.576547681   | 0.022683949  |
| H276 | -0.282029339 | 8.007942153   | -2.843417044 |
| H277 | 0.457322706  | 5.489418434   | -2.303916772 |
| H278 | -2.832893463 | 6.799022613   | -1.755885640 |
| H279 | -0.996284909 | 7.362094578   | 6.792594269  |
| H280 | -1.730123041 | 9.316193628   | 4.225291203  |
| H281 | -2.035666470 | 11.757612450  | 5.820038307  |
| H282 | 0.516614244  | 8.252076379   | 6.517725013  |
| H283 | -4.072660890 | 9.104581151   | 5.291154038  |
| H284 | 7.470358973  | 1.616219063   | -7.465380516 |
| H285 | 7.438880684  | -0.150618906  | -7.302004256 |
| H286 | 9.569814678  | -2.334355364  | -3.758709480 |
| H287 | 8.560260449  | 0.407877510   | -9.328354508 |
| H288 | 7.090975936  | -0.157134170  | -9.783398921 |
| H289 | 5.016520779  | 4.803981583   | 3.492424778  |
| H290 | 4.130359499  | 6.574124238   | 5.872442983  |
| H291 | 4.735621167  | 8.745079276   | 2.172963070  |
| H292 | 3.318268669  | 5.224759757   | 3.859576690  |
| H293 | 5.434174922  | 7.548319532   | 5.741684703  |
| H294 | 6.352474097  | 5.668554161   | -2.417358830 |
| H295 | 5.639817132  | 7.182027518   | 3.434979903  |
| H296 | 4.413588095  | -8.209552499  | 2.894914766  |
| H297 | 6.952080787  | -8.167296064  | 1.177050702  |
| H298 | 5.256917414  | 4.377044122   | -4.025921038 |
| H299 | 3.612522769  | -1.378363511  | 4.452965066  |
| H300 | 2.841970434  | 5.369749961   | -6.373583505 |
| H301 | 0.356002323  | -0.178592194  | -5.045550944 |
| H302 | 2.065708797  | 5.025339240   | -4.829831464 |
| H303 | 3.274246529  | -5.755552819  | 2.986391553  |
| H304 | 3.894336493  | 3.063101010   | -4.750141915 |
| H305 | 3.800429833  | -5.423982356  | 1.335557777  |
| H306 | 4.556655006  | -7.736438034  | 1.186021740  |
| H307 | 6.171207218  | -5.854702663  | 1.968410119  |
| H308 | 5.679275617  | -6.237842489  | 3.630655417  |
| H309 | -2.843504733 | 2.362290054   | -7.397542709 |
| H310 | 5.384397800  | -10.487063036 | 2.252157966  |
| H311 | 5.261286857  | -12.077004434 | -0.378601864 |
| H312 | 1.357817031  | 1.396076612   | -3.382832561 |
| H313 | 5.866935687  | -12.983600263 | 2.326844603  |
| H314 | 4.514833700  | -13.205293682 | 1.426677823  |
| H315 | 4.945035914  | -3.460224469  | 2.044535832  |
| H316 | 0.654455909  | 3.750596082   | -3.343764223 |
| H317 | -1.337659661 | 0.646775648   | -6.668031855 |
| H318 | 9.018028503  | -8.209502677  | -2.957340218 |
| H319 | 8.517234153  | -5.143684350  | -4.381961360 |
| H320 | 7.294964005  | -7.334106620  | -1.469095995 |
| H321 | 8.748629702  | -8.305134293  | -4.474210492 |
| H322 | 7.136006355  | 6.565090735   | -5.168311460 |
| H323 | 6.851519559  | -4.415028221  | -0.435957996 |
| H324 | 3.093044579  | -6.967580548  | -1.711647069 |
| H325 | 5.618387243  | 1.717238406   | -6.124222384 |
| H326 | 4.369682882  | -7.716237866  | -3.783208379 |
| H327 | 6.172838303  | -2.820960308  | -7.985269399 |
| H328 | 4.551519895  | -2.321506129  | -6.085052968 |
| H329 | 6.809807421  | -12.697877437 | 0.200446636  |
| H330 | 4.467469892  | -1.474666571  | 2.912358333  |
| H331 | 8.524080819  | -5.581704602  | 0.842035034  |
| H332 | 7.338919530  | -3.289957078  | 0.515004337  |
| H333 | 8.605371347  | -7.407586206  | 2.395766631  |
| H334 | 3.159730062  | -4.838483786  | 4.837178429  |
| H335 | 5.462521854  | -8.760037639  | -7.324342364 |

|       |              |               |              |
|-------|--------------|---------------|--------------|
| H336  | 5.519962422  | -5.611778992  | -5.690074929 |
| H337  | 6.471117852  | -6.305512940  | -4.357907967 |
| H338  | 3.483430740  | -6.715015554  | -4.964965803 |
| H339  | 3.399040391  | 0.921000998   | -5.617894764 |
| H340  | -1.030202466 | 4.608051469   | -4.999992113 |
| H341  | -2.902436869 | 3.964224882   | -6.625926268 |
| H342  | 2.631399105  | -5.241606538  | -1.624063031 |
| H343  | 8.828410178  | -6.916476829  | 0.114882978  |
| H344  | 7.877135638  | -8.671026503  | -0.928598069 |
| H345  | 2.625313417  | -3.295808001  | 5.359268956  |
| H346  | 8.404114486  | -3.755698479  | -7.121561604 |
| H347  | 7.864572207  | -4.079033073  | -3.135051902 |
| H348  | 3.067024549  | 0.842488356   | -7.375883261 |
| H349  | 5.409460160  | 7.097545123   | -2.902350720 |
| H350  | 5.858294808  | -1.881777325  | 5.932491520  |
| H351  | 6.403266789  | -0.719280541  | 4.699516165  |
| H352  | 11.353020919 | -2.928482594  | -5.152008623 |
| H353  | 10.778317833 | -4.434650316  | -5.429775683 |
| H354  | 11.466456355 | -6.956929686  | -1.753683490 |
| H355  | 10.077459352 | -5.946924161  | -3.246878454 |
| H356  | 13.204291168 | -5.022114290  | -2.633344293 |
| H357  | 10.980642204 | -5.689741280  | -0.604938420 |
| H358  | 9.059112802  | -1.180699969  | 5.438111031  |
| H359  | -5.581397930 | 10.147237257  | 7.887034769  |
| H360  | 8.870850319  | -8.656749671  | 5.125506018  |
| H361  | 8.466977264  | -5.928595915  | 4.944201681  |
| H362  | -6.598869515 | 10.480763737  | 5.058234208  |
| H363  | -5.978950572 | 7.654971351   | 6.120866222  |
| H364  | -7.579827553 | 8.277632359   | 5.690183493  |
| H365  | -6.329669890 | 7.104388406   | -0.557432507 |
| H366  | 0.280799659  | -1.498321713  | -0.639471819 |
| H367  | 2.448435812  | -2.478235325  | -0.729431343 |
| H368  | -1.359791297 | 0.299282302   | -1.290338393 |
| Mo369 | 4.893129457  | -2.751195125  | -2.825894583 |
| N370  | 1.899846712  | -1.236414587  | 1.532900779  |
| N371  | 2.155593164  | -0.313872855  | 0.935340535  |
| N372  | -5.372560179 | -5.905646733  | -5.741084879 |
| N373  | -8.206760902 | -4.571198440  | -3.718192390 |
| N374  | -8.780521088 | -6.143517590  | -1.438415287 |
| N375  | -6.296835524 | -7.295432416  | -0.815298897 |
| N376  | -4.750303376 | -4.970727691  | -0.156813314 |
| N377  | -6.191223073 | -4.156704459  | 2.158352154  |
| N378  | -6.082961272 | -6.466973959  | 3.900653147  |
| N379  | -3.410744010 | -7.539713222  | 3.926597915  |
| N380  | -1.597778101 | -5.458329877  | 4.138434768  |
| N381  | -2.524172236 | -3.013641824  | 5.657978138  |
| N382  | -3.935237499 | -4.343813963  | 7.737739181  |
| N383  | 5.227668769  | -12.519156624 | 1.678114665  |
| N384  | 5.987720280  | -9.940661381  | 1.627985470  |
| N385  | 4.385337470  | -3.990781809  | 2.718669970  |
| N386  | 2.999856318  | -3.863481052  | 4.604793745  |
| N387  | 3.904450229  | -1.938279276  | 3.656722675  |
| N388  | 8.346788753  | -7.943689340  | 3.252571094  |
| N389  | -4.320052787 | -1.173140688  | -5.600759148 |
| N390  | -0.080636869 | -3.347726883  | -5.585323324 |
| N391  | -5.115868693 | 0.743209615   | -3.944712471 |
| N392  | -7.792223613 | 1.011916470   | -3.334763656 |
| N393  | -7.910143921 | -0.359895922  | -0.875291996 |
| N394  | -6.280344738 | 1.002214910   | 0.995108520  |
| N395  | -3.101439170 | 2.949762554   | -0.929520399 |
| N396  | -2.075670084 | 0.990571936   | -1.016483957 |
| N397  | -7.445889007 | 3.074098794   | 2.403693607  |

|      |               |               |               |
|------|---------------|---------------|---------------|
| N398 | -10.582616490 | 6.477239906   | 1.399192543   |
| N399 | -11.136319347 | 7.494837427   | 3.291226131   |
| N400 | 7.813241196   | 0.875982696   | 6.365264602   |
| N401 | 5.016801763   | 6.689592443   | 5.370022885   |
| N402 | 3.911287834   | 8.878739834   | 2.752810878   |
| N403 | 1.732819266   | 8.287982867   | 1.064227485   |
| N404 | -2.159325680  | 7.562858607   | -1.978335298  |
| N405 | -1.780061140  | 9.872918183   | -2.098151030  |
| N406 | -3.618301591  | 9.050933835   | -0.952453444  |
| N407 | 0.197748265   | 6.222273212   | 2.331993248   |
| N408 | -0.359724603  | 7.454455858   | 4.801361541   |
| N409 | -1.893199958  | 9.823802401   | 5.096587601   |
| N410 | -2.164298204  | 10.153477603  | 1.911448669   |
| N411 | -4.626342993  | 9.928713033   | 5.510909538   |
| N412 | 7.561692197   | 0.628878633   | -9.325534000  |
| N413 | 5.017527773   | 1.353325884   | -6.874874796  |
| N414 | 3.423229057   | 3.569866709   | -5.523979096  |
| N415 | 5.096290214   | 5.390859819   | -4.069376720  |
| N416 | 1.810726616   | 2.048019294   | -10.305160673 |
| N417 | -0.390922789  | 3.012595947   | -8.752985403  |
| N418 | 10.488279597  | -3.466962393  | -5.255726742  |
| N419 | 6.145821421   | -3.007441962  | -4.810417844  |
| N420 | 6.393420942   | -2.959058894  | -7.002735032  |
| N421 | 10.620505877  | -5.303758246  | -2.671180801  |
| N422 | -0.061854028  | 2.457032738   | 0.670069955   |
| N423 | 0.877501275   | 1.916009076   | 0.348750313   |
| O424 | -6.112051788  | -5.176949363  | -3.061061536  |
| O425 | -8.120804248  | -4.403294776  | -0.123740103  |
| O426 | -7.049226834  | -7.696251032  | 1.308079728   |
| O427 | -3.602521505  | -6.315799400  | 1.276353267   |
| O428 | -4.259182549  | -3.230463448  | 2.921272152   |
| O429 | -5.913124299  | -4.955846852  | 5.603688676   |
| O430 | -3.864060826  | -8.444536563  | 5.986830241   |
| O431 | 0.188492324   | -6.903798224  | 4.231505228   |
| O432 | -0.468669940  | -3.429785276  | 6.556386974   |
| O433 | -2.861274343  | -2.944733587  | 9.168910794   |
| O434 | -3.123054668  | -6.075665453  | 10.767378316  |
| O435 | 7.272725963   | -10.212548711 | -0.277699621  |
| O436 | 6.771442544   | -9.270844348  | 4.275317430   |
| O437 | 10.320004439  | -6.247818679  | 5.732175395   |
| O438 | -5.293083945  | -0.664341969  | -2.138661476  |
| O439 | -1.771486039  | -2.121005646  | -6.480402367  |
| O440 | -7.353252982  | 2.688753743   | -1.854736460  |
| O441 | -5.537099579  | 4.441499510   | -3.663332658  |
| O442 | -10.145121349 | 0.144299459   | -0.689638821  |
| O443 | -6.863133242  | -0.472182036  | 2.637331333   |
| O444 | -5.784261363  | 2.991988563   | 3.967873210   |
| O445 | -8.884699196  | 4.208685502   | 5.440372849   |
| O446 | 8.594153745   | -2.532944026  | 6.897299849   |
| O447 | 1.586757738   | 2.514648716   | 6.760131978   |
| O448 | 2.601578474   | 8.015354867   | 4.404022568   |
| O449 | 0.727611620   | 10.268787191  | 1.656598506   |
| O450 | -1.607757153  | 7.109953398   | 1.247472397   |
| O451 | -2.160973201  | 6.065470615   | 5.080580498   |
| O452 | 1.037796888   | 4.619034834   | 4.783263726   |
| O453 | -1.270136763  | 10.001074164  | 7.293058730   |
| O454 | -4.611640208  | 12.203744854  | 5.676048640   |
| O455 | -4.194393110  | 11.117242853  | 2.326692220   |
| O456 | -7.566605198  | 10.436058431  | 7.505899341   |
| O457 | -5.530731356  | 6.931856915   | -0.022506457  |
| O458 | 4.929919674   | 0.000115073   | -8.733498925  |
| O459 | 2.393667362   | 3.289449778   | -7.553727671  |

|                    |                                    |              |              |               |              |
|--------------------|------------------------------------|--------------|--------------|---------------|--------------|
|                    | O460                               | 3.697041865  | 7.110806560  | -4.618492840  |              |
|                    | O461                               | 8.080449274  | 7.384631844  | -3.556226029  |              |
|                    | O462                               | -1.718594398 | 1.848847116  | -10.201137469 |              |
|                    | O463                               | 1.322386142  | -3.007990681 | -8.358575973  |              |
|                    | O464                               | 3.247900099  | -1.928414199 | -8.038055024  |              |
|                    | O465                               | -1.523272170 | 6.019790502  | -7.232788146  |              |
|                    | O466                               | 11.207678292 | -3.198136058 | -2.075689482  |              |
|                    | O467                               | 13.594668289 | -5.368568976 | -0.660932591  |              |
|                    | O468                               | 0.827520147  | -5.464701056 | -3.535634681  |              |
|                    | O469                               | 1.324056861  | -7.630561544 | -3.442356146  |              |
|                    | O470                               | 7.099015419  | -8.291973313 | -5.794602307  |              |
|                    | O471                               | 5.113430597  | -7.988757250 | -6.828651838  |              |
|                    | O472                               | 5.933642454  | -4.595065123 | -2.019339227  |              |
|                    | O473                               | 5.660451000  | -6.807921788 | -1.685895070  |              |
|                    | O474                               | 3.919629234  | -4.395755569 | -3.698588690  |              |
|                    | O475                               | 9.052530721  | -6.412282246 | 0.940997279   |              |
|                    | O476                               | 7.269997551  | -4.263257140 | 0.449705950   |              |
|                    | O477                               | -4.042774320 | 5.437146552  | -1.593724207  |              |
|                    | O478                               | 9.483066603  | -8.324733195 | -3.825701904  |              |
|                    | O479                               | 8.163600215  | -7.805944548 | -1.322123944  |              |
|                    | S480                               | 3.866834082  | 5.690452784  | 1.528199439   |              |
|                    | S481                               | 2.869870545  | 3.216734424  | -1.302719411  |              |
|                    | S482                               | 3.459518232  | -1.204162601 | -3.927997731  |              |
|                    | S483                               | 3.464921218  | 1.985345382  | 2.001368055   |              |
|                    | S484                               | 0.591949080  | -1.148790313 | -1.918991739  |              |
|                    | S485                               | 5.639563950  | 1.931927568  | -3.675627216  |              |
|                    | S486                               | 3.755179473  | -3.039871411 | -0.665056866  |              |
|                    | S487                               | 6.247251931  | 2.861528131  | -0.040968093  |              |
|                    | S488                               | 6.727884639  | -1.408976486 | -2.139855659  |              |
|                    | S489                               | 6.063597420  | -0.839505972 | 1.468523597   |              |
| <b>18, 47(3/2)</b> | <b>bm2unh2b2n2x2n2n3b235.car_1</b> |              |              |               |              |
| Fe1                | 3.15                               | C1           | -7.567691089 | -5.541411385  | 1.472139433  |
| Fe2                | 0.31                               | C2           | -7.776270419 | -6.761521817  | 0.570017331  |
| Fe3                | -2.49                              | C3           | -8.618345995 | -3.618094196  | 2.580447857  |
| Fe4                | 2.93                               | C4           | -8.095165925 | -3.831174782  | 3.999826777  |
| Fe5                | -2.20                              | C5           | -7.917222594 | -5.328875689  | 5.924283027  |
| Fe6                | -2.10                              | C6           | -6.394891843 | -5.484373915  | 6.012186180  |
| Fe7                | 2.48                               | C7           | -4.332704667 | -6.074127518  | 4.827675729  |
|                    |                                    | C8           | -3.656535650 | -4.710044525  | 4.663406047  |
|                    |                                    | C9           | -3.734150112 | -2.488348012  | 3.662491762  |
|                    |                                    | C10          | -3.803844632 | -1.654275694  | 4.951010585  |
|                    |                                    | C11          | -5.026175244 | -1.096345845  | 6.973227890  |
|                    |                                    | C12          | -4.133716081 | -1.633158722  | 8.101478371  |
|                    |                                    | C13          | -3.450342035 | -3.587491113  | 9.408330672  |
|                    |                                    | C14          | -1.955355109 | -3.891309475  | 9.253358969  |
|                    |                                    | C15          | -0.158158147 | -4.640562046  | 7.751442580  |
|                    |                                    | C16          | 0.745892602  | -3.653778175  | 7.005668160  |
|                    |                                    | C17          | 0.820712426  | -1.455239018  | 5.840301360  |
|                    |                                    | C18          | 0.820284972  | -0.173692261  | 6.690513222  |
|                    |                                    | C19          | 0.243795804  | -1.250384328  | 4.420894476  |
|                    |                                    | C20          | 0.776151964  | 0.044763008   | 3.799428214  |
|                    |                                    | C21          | 0.528843517  | -2.479603966  | 3.550423876  |
|                    |                                    | C22          | -0.469907752 | 1.718186959   | 7.574123761  |
|                    |                                    | C23          | -0.290280006 | 1.523035748   | 9.089982554  |
|                    |                                    | C24          | -1.773215990 | 2.470584527   | 7.210359465  |
|                    |                                    | C25          | -1.929699837 | 3.746548979   | 8.046134740  |
|                    |                                    | C26          | -1.803468105 | 2.810900770   | 5.714075435  |
|                    |                                    | C27          | -0.886691914 | 0.262044500   | 11.076451591 |
|                    |                                    | C28          | 0.546411806  | 0.148987628   | 11.556267716 |
|                    |                                    | C29          | 6.469629447  | -10.880590517 | 4.608611435  |
|                    |                                    | C30          | 6.919223060  | -9.654849809  | 3.812615798  |

|     |               |              |              |
|-----|---------------|--------------|--------------|
| C31 | 7.139193455   | -7.167817975 | 3.970395267  |
| C32 | 8.344058348   | -6.673511539 | 4.794179249  |
| C33 | 5.942086070   | -6.205985124 | 4.071043717  |
| C34 | 6.257596609   | -4.782009586 | 3.604593754  |
| C35 | 4.976889185   | -3.973866114 | 3.384612085  |
| C36 | 4.937610947   | -1.468294001 | 3.452624806  |
| C37 | 10.622100358  | -5.778966236 | 4.696159579  |
| C38 | 10.860984803  | -4.291993781 | 4.545869189  |
| C39 | -5.239191794  | -2.905961349 | -1.321366514 |
| C40 | -5.680320451  | -1.470229959 | -0.988229535 |
| C41 | -3.697150712  | -2.951762979 | -1.299915649 |
| C42 | -3.055426271  | -4.354003875 | -1.314267565 |
| C43 | -2.798161744  | -4.942465264 | -2.699183378 |
| C44 | -6.448229859  | 0.632408141  | -2.001477388 |
| C45 | -7.715406473  | 1.022618235  | -1.230855451 |
| C46 | -6.453411734  | 1.275018018  | -3.404194439 |
| C47 | -9.531028167  | 0.277361911  | 0.227669729  |
| C48 | -9.026403541  | 0.518225329  | 1.657941112  |
| C49 | -7.144591727  | 0.356782878  | 3.231190865  |
| C50 | -6.055627986  | 1.418057941  | 3.379895942  |
| C51 | -4.601225066  | 3.073880818  | 2.292870441  |
| C52 | -5.095632090  | 4.421821217  | 2.879877541  |
| C53 | -4.038141422  | 3.392427126  | 0.898585012  |
| C54 | -3.372610608  | 2.286548315  | 0.135814806  |
| C55 | -2.712907187  | 1.127922427  | 0.473080562  |
| C56 | -2.586739345  | 1.342387491  | -1.730773097 |
| C57 | -7.016362205  | 5.982155490  | 2.987894302  |
| C58 | -6.977196656  | 6.208696387  | 4.496844366  |
| C59 | -8.475218500  | 5.959157149  | 2.475262410  |
| C60 | -9.119433935  | 7.296650092  | 2.253141658  |
| C61 | -9.101318205  | 8.448990084  | 3.014844867  |
| C62 | -10.338503537 | 8.741727929  | 1.199997335  |
| C63 | 9.095150132   | 1.997200995  | 3.398367248  |
| C64 | 10.082838230  | 0.851090647  | 3.283246954  |
| C65 | 7.678811618   | 1.393910007  | 3.228826135  |
| C66 | 6.584512333   | 2.423773830  | 3.385386588  |
| C67 | 6.001301056   | 2.686191889  | 4.638912779  |
| C68 | 6.119143696   | 3.155190345  | 2.277624414  |
| C69 | 4.985991542   | 3.638024258  | 4.786025607  |
| C70 | 5.120256607   | 4.118440008  | 2.411510006  |
| C71 | 4.547357219   | 4.353456564  | 3.664384004  |
| C72 | 5.338524714   | 7.333547769  | -1.687539548 |
| C73 | 4.197937425   | 8.283131787  | -2.076592294 |
| C74 | 4.771711185   | 5.949047900  | -1.340078388 |
| C75 | 3.023604459   | 9.416558708  | -3.912344639 |
| C76 | 1.613841219   | 8.824886151  | -3.909301878 |
| C77 | 0.224414281   | 6.799114157  | -3.709198749 |
| C78 | -0.313914318  | 6.726827592  | -2.265649693 |
| C79 | 0.337196419   | 5.413812610  | -4.370077435 |
| C80 | -0.936878987  | 4.564121026  | -4.432802355 |
| C81 | -2.037651482  | 5.031033310  | -5.404328592 |
| C82 | -3.412849791  | 7.089897733  | -5.059462038 |
| C83 | 0.138734776   | 6.439880457  | 0.115784604  |
| C84 | 0.010822160   | 7.827896652  | 0.776095103  |
| C85 | 1.025345014   | 5.558080097  | 1.000649252  |
| C86 | 1.064768284   | 10.017798789 | 1.065598762  |
| C87 | 0.286288592   | 11.289140143 | 0.736979057  |
| C88 | -1.387012957  | 12.386308808 | -0.696478533 |
| C89 | -2.675030228  | 12.743186400 | 0.074823889  |
| C90 | -1.669244022  | 12.286012567 | -2.213422946 |
| C91 | -2.599524839  | 11.121895007 | -2.531529870 |
| C92 | -4.414042465  | 11.961990819 | 1.621795432  |

|       |              |               |              |
|-------|--------------|---------------|--------------|
| C93   | -4.320370647 | 13.041835553  | 2.696333789  |
| C94   | -4.855090445 | 10.616809646  | 2.257920691  |
| C95   | -5.091500289 | 9.534766768   | 1.228805796  |
| C96   | -6.321868571 | 9.441308531   | 0.559959949  |
| C97   | -4.078820397 | 8.621867740   | 0.886253001  |
| C98   | -6.535674336 | 8.480392676   | -0.430276941 |
| C99   | -4.266407309 | 7.668056658   | -0.117853948 |
| C100  | -5.497263581 | 7.611251683   | -0.768585998 |
| C101  | 4.133452726  | -4.112238222  | -8.941873146 |
| C102  | 2.715283647  | -3.934627317  | -8.425640755 |
| C103  | 1.203555668  | -2.442781605  | -7.136473744 |
| C104  | 0.627430149  | -1.138574428  | -7.696265218 |
| C105  | 0.860153772  | 1.297579091   | -7.750941150 |
| C106  | 1.943556221  | 2.355016200   | -7.936628723 |
| C107  | 4.247812120  | 3.094476180   | -7.603471814 |
| C108  | 5.089025518  | 3.033759249   | -8.863567710 |
| C109  | -2.730618212 | -3.978137314  | -8.974467793 |
| C110  | -3.796713464 | -2.911576599  | -8.691523754 |
| C111  | -2.205952615 | -4.556768526  | -7.640351740 |
| C112  | -1.426125625 | -5.865748984  | -7.866288116 |
| C113  | -0.693752043 | -6.280665079  | -6.609122061 |
| C114  | -4.269214001 | -0.577128918  | -8.115437958 |
| C115  | -3.853447152 | 0.698779917   | -8.821516542 |
| C116  | -4.545414331 | -0.418391160  | -6.598927969 |
| C117  | -3.290884552 | -0.436479764  | -5.761287390 |
| C118  | -2.509415340 | 0.720140738   | -5.582974166 |
| C119  | -2.829620746 | -1.644766464  | -5.212119011 |
| C120  | -1.284889092 | 0.651305088   | -4.907460108 |
| C121  | -1.603991652 | -1.713380205  | -4.540965029 |
| C122  | -0.817418652 | -0.565040216  | -4.400918352 |
| C123  | 8.111564027  | -6.012593034  | -4.499016866 |
| C124  | 9.305930884  | -6.007815306  | -3.529836752 |
| C125  | 6.819730826  | -6.509515174  | -3.828867367 |
| C126  | 5.572335112  | -6.390007408  | -4.649817092 |
| C127  | 5.281265865  | -7.053102612  | -5.824394240 |
| C128  | 3.506153158  | -5.899242230  | -5.174431357 |
| C129  | 10.637452635 | -7.163150816  | -1.852364451 |
| C130  | 11.952250572 | -6.907765981  | -2.555439088 |
| C131  | 0.868922902  | -7.180977293  | 0.142810063  |
| C132  | 2.289526914  | -6.721753252  | 0.317843447  |
| C133  | 3.182854188  | -6.923823559  | -0.972655841 |
| C134  | 3.124152107  | -8.416203645  | -1.402243122 |
| C135  | 4.093299956  | -8.744319861  | -2.548613431 |
| C136  | 4.262969210  | -10.216801558 | -2.796847864 |
| C137  | 4.649493627  | -6.630411508  | -0.530493201 |
| C138  | 3.590420263  | -0.656897900  | -2.262251966 |
| Fe139 | 3.874135907  | -1.976744469  | -3.767038985 |
| Fe140 | 2.351136889  | 0.817258608   | -1.343682655 |
| Fe141 | 5.000952421  | 0.589317248   | -1.477886322 |
| Fe142 | 3.896092041  | 0.572603322   | -3.814419246 |
| Fe143 | 4.025675617  | 2.902687280   | -2.447142344 |
| Fe144 | 4.786496785  | -1.949591056  | -1.358525660 |
| Fe145 | 2.139921370  | -2.014928352  | -1.878179144 |
| H146  | -5.855528282 | -7.441151596  | 0.666414391  |
| H147  | -6.193777250 | -6.644732895  | -0.718244013 |
| H148  | -9.560728218 | -5.053663541  | 1.304393890  |
| H149  | -8.511697574 | -6.517893676  | -0.211933765 |
| H150  | -8.248300170 | -7.535054682  | 1.201198239  |
| H151  | -7.954710825 | -2.874751990  | 2.115860138  |
| H152  | -8.964668106 | -5.689107597  | 4.078906961  |
| H153  | -9.626745587 | -3.187324203  | 2.642894917  |
| H154  | -8.387514523 | -6.266140123  | 6.250621370  |

|      |              |              |              |
|------|--------------|--------------|--------------|
| H155 | -6.320817331 | -6.100651713 | 4.055636139  |
| H156 | -8.197103361 | -4.537288620 | 6.631900287  |
| H157 | -2.677907353 | -2.513347179 | 3.362847645  |
| H158 | -5.065631988 | -4.133171992 | 3.264080699  |
| H159 | -4.068463242 | -6.713408322 | 3.973953563  |
| H160 | -4.753822180 | -0.044677717 | 6.816226933  |
| H161 | -5.681506258 | -2.404064026 | 5.392794917  |
| H162 | -3.927283640 | -6.528490747 | 5.739821587  |
| H163 | -4.304757461 | -1.989675420 | 2.865695902  |
| H164 | -4.719483265 | -3.576474501 | 7.690151722  |
| H165 | -6.074443285 | -1.141653662 | 7.298838722  |
| H166 | 0.132668941  | -3.395575506 | 4.013942424  |
| H167 | 0.054847051  | -2.366978869 | 2.563059747  |
| H168 | 1.607889417  | -2.609572218 | 3.381872058  |
| H169 | -0.849141890 | -1.155976099 | 4.519885942  |
| H170 | -3.955942436 | -4.536583398 | 9.637570139  |
| H171 | -1.795312153 | 1.914327782  | 5.078330712  |
| H172 | -1.667219136 | -0.033918215 | 9.114494554  |
| H173 | -1.965756482 | 3.541204274  | 9.125474335  |
| H174 | 0.350519776  | 0.187052198  | 2.796245017  |
| H175 | 1.868670431  | 0.015133108  | 3.685872669  |
| H176 | 9.172462435  | 2.398458105  | 4.427180410  |
| H177 | -2.714268207 | 3.377917289  | 5.473462173  |
| H178 | -2.860436537 | 4.259797764  | 7.762964979  |
| H179 | -0.935328346 | 3.433702057  | 5.442395086  |
| H180 | -1.091813635 | 4.437939479  | 7.862968519  |
| H181 | -2.622054916 | 1.800022152  | 7.436597747  |
| H182 | 0.390377382  | 2.335726283  | 7.271543073  |
| H183 | -1.214292462 | 0.090787583  | 6.378985481  |
| H184 | 0.512245007  | 0.925593803  | 4.401440171  |
| H185 | 1.168903675  | 4.584624878  | 0.500955847  |
| H186 | 0.479884331  | 5.392457232  | 1.943576522  |
| H187 | 2.640922070  | 5.855467329  | 2.078290011  |
| H188 | 3.189732632  | 5.341788067  | 4.638917085  |
| H189 | 4.752914148  | 4.658330710  | 1.538087752  |
| H190 | 6.518273872  | 2.945255225  | 1.282817062  |
| H191 | 6.339565370  | 2.132688461  | 5.519486062  |
| H192 | -0.862455707 | -2.439836523 | 6.726441173  |
| H193 | -0.163615867 | -5.575844968 | 7.172449239  |
| H194 | 0.317214478  | -4.842526887 | 8.720414124  |
| H195 | -2.193373750 | -4.305641445 | 7.230094533  |
| H196 | -3.542395163 | -2.929207466 | 10.282058244 |
| H197 | 4.530722390  | 3.813750925  | 5.764859406  |
| H198 | 1.873371013  | -1.759873337 | 5.770083414  |
| H199 | -1.397585540 | 1.041013692  | 11.666053480 |
| H200 | -1.376501563 | -0.701190238 | 11.290326922 |
| H201 | 1.274363385  | -0.209412533 | 10.791024770 |
| H202 | 11.495536970 | -6.330406248 | 4.316943680  |
| H203 | -1.448674542 | -6.075208369 | -3.743734711 |
| H204 | 1.375886077  | -8.824856106 | 1.012420641  |
| H205 | -2.132215588 | -6.667224291 | -8.128960881 |
| H206 | -0.714857791 | -5.743986798 | -8.696404135 |
| H207 | -3.044192086 | -4.754073942 | -6.954146109 |
| H208 | -3.375153313 | 0.533267463  | -9.815102736 |
| H209 | -3.293174864 | -4.776385589 | -9.482306446 |
| H210 | -3.313712760 | -2.357301800 | -2.143951799 |
| H211 | -3.690913260 | -5.072809631 | -0.767178458 |
| H212 | -2.336812195 | -1.464099839 | -8.412638068 |
| H213 | -5.227557547 | -0.857652036 | -8.596286358 |
| H214 | -1.050375413 | -2.859711906 | -9.460322079 |
| H215 | -0.983843323 | -5.744014963 | -2.077055389 |
| H216 | -1.570333501 | -3.801901613 | -7.151815246 |



|      |               |              |               |
|------|---------------|--------------|---------------|
| H217 | -1.178653370  | -4.281136301 | -10.281649888 |
| H218 | -6.648131756  | -3.861629987 | -2.491242507  |
| H219 | -3.370776604  | -2.446869494 | -0.379334710  |
| H220 | 0.958209481   | -5.533587954 | -7.383307465  |
| H221 | -2.101099575  | -4.302064300 | -0.771491052  |
| H222 | -3.803685659  | 2.729499792  | 2.966201211   |
| H223 | -2.539642039  | 0.666182812  | 1.438621440   |
| H224 | -7.954717443  | 0.628310376  | 3.921368472   |
| H225 | -7.144345085  | -0.244010043 | 1.181579324   |
| H226 | -7.000724291  | 3.956439494  | 2.285435671   |
| H227 | -8.604375977  | 8.706615372  | 3.943559610   |
| H228 | -7.112188453  | 5.274155027  | 5.095406734   |
| H229 | -9.086393848  | 5.332383920  | 3.149234162   |
| H230 | -6.449793763  | 6.787703180  | 2.495786545   |
| H231 | -10.978292844 | 9.241529498  | 0.476427088   |
| H232 | -3.314575970  | 4.213191179  | 1.033243912   |
| H233 | -4.853773485  | 3.798823434  | 0.278030215   |
| H234 | -10.066094186 | 10.314803107 | 2.607522966   |
| H235 | -8.471393796  | 5.450981211  | 1.498242902   |
| H236 | -6.025083590  | 1.760704083  | 1.345375141   |
| H237 | -6.729845293  | -0.599139985 | 3.584358285   |
| H238 | -10.110544020 | 1.163239386  | -0.060944136  |
| H239 | -2.325595316  | 1.160119300  | -2.770751456  |
| H240 | -10.215679643 | -0.580881428 | 0.243253635   |
| H241 | 10.208776696  | 3.517166177  | 2.593980721   |
| H242 | 8.609382497   | 3.647437520  | 2.287774981   |
| H243 | 1.540378473   | 6.182843755  | -1.514915947  |
| H244 | -0.872593405  | 6.009147144  | 0.123177626   |
| H245 | 1.525017130   | 8.567563255  | -0.396545328  |
| H246 | -3.671577572  | 3.178273463  | -1.810128974  |
| H247 | -5.320822782  | 3.872545235  | -3.042034947  |
| H248 | -4.986902787  | 5.176572523  | -2.193010435  |
| H249 | -5.498264675  | 1.061236750  | -3.902958938  |
| H250 | -7.270502140  | 0.848886273  | -4.010318418  |
| H251 | -0.706219990  | 12.192935536 | -2.737134339  |
| H252 | -2.154508429  | 13.219857859 | -2.525785220  |
| H253 | -1.004553653  | 9.906667942  | -3.185631473  |
| H254 | -2.557113456  | 9.131442861  | -2.998702553  |
| H255 | -3.140902835  | 8.695206238  | -6.301918812  |
| H256 | -2.528561015  | 4.158984659  | -5.861098864  |
| H257 | -7.502911824  | 8.414656390  | -0.935505576  |
| H258 | -3.116722032  | 8.637601694  | 1.407234121   |
| H259 | -4.622455589  | 7.346288244  | -3.406164840  |
| H260 | 1.103111359   | 4.824380444  | -3.840312677  |
| H261 | 2.362256325   | 6.920300693  | -3.619735407  |
| H262 | -1.365663028  | 4.423479071  | -3.428052187  |
| H263 | -8.232218209  | -0.926446502 | -0.991063231  |
| H264 | 3.267368927   | 9.701246899  | -4.945008029  |
| H265 | -6.207195583  | -1.362063878 | -2.914099155  |
| H266 | 0.716191369   | 5.570558447  | -5.393561282  |
| H267 | -3.450022097  | 7.007242442  | -0.415470428  |
| H268 | -7.227529953  | 2.859156779  | -2.569329493  |
| H269 | 2.973484591   | 10.336117993 | -3.313644590  |
| H270 | -2.527478078  | 7.200797117  | -6.916968875  |
| H271 | -4.740890769  | 8.578049177  | -4.613113657  |
| H272 | -5.097732039  | -3.908806954 | -3.112351063  |
| H273 | -5.603404330  | -3.523202854 | -0.478174439  |
| H274 | -7.132616357  | 10.128548486 | 0.814490963   |
| H275 | -5.639836560  | 1.108821477  | -1.421876604  |
| H276 | -0.501668970  | 7.423075510  | -4.248164368  |
| H277 | -1.586348161  | 5.597925605  | -6.227924729  |
| H278 | -0.612302990  | 3.568473107  | -4.763197258  |

|      |              |               |               |
|------|--------------|---------------|---------------|
| H279 | -3.616165679 | 5.369134035   | -4.003235804  |
| H280 | 0.876479723  | 9.799091264   | 2.127342504   |
| H281 | -0.786112538 | 10.316844944  | -0.719086933  |
| H282 | -0.711145042 | 13.238029496  | -0.530867043  |
| H283 | 2.128374049  | 10.270419554  | 0.957670178   |
| H284 | -2.632367664 | 10.928250324  | 1.010400960   |
| H285 | 4.593873602  | -3.129748299  | -9.121635212  |
| H286 | 4.700020858  | -4.585248333  | -8.112793089  |
| H287 | 7.973421100  | -4.962278410  | -4.794858630  |
| H288 | 5.083296676  | -5.187830577  | -10.390937164 |
| H289 | 3.586017041  | -5.744449095  | -10.027398897 |
| H290 | 5.617749683  | 5.295914621   | -1.088773346  |
| H291 | 5.446214922  | 8.085160695   | 0.200189043   |
| H292 | 4.692465107  | 8.086978450   | -4.060654779  |
| H293 | 4.114738842  | 6.032292483   | -0.461136393  |
| H294 | 6.585487561  | 8.696693972   | -0.801106582  |
| H295 | 4.906717155  | 3.006432039   | -6.725721898  |
| H296 | 6.026315557  | 7.224520799   | -2.540745245  |
| H297 | 5.585566391  | -6.195096137  | 5.114509175   |
| H298 | 7.425783262  | -7.281015884  | 2.917489196   |
| H299 | 3.436603838  | 1.207957483   | -7.042413038  |
| H300 | 4.968853393  | 0.562904315   | 3.192302540   |
| H301 | 0.355930446  | 1.173878528   | -8.718743567  |
| H302 | -1.259241645 | -2.664030205  | -4.128706728  |
| H303 | 0.115732579  | 1.739711624   | -7.068189950  |
| H304 | 4.387727169  | -3.893345148  | 4.307645776   |
| H305 | 1.988794091  | -0.130508832  | -6.554286365  |
| H306 | 4.338118138  | -4.486081467  | 2.647015300   |
| H307 | 5.137850686  | -6.634032437  | 3.450639184   |
| H308 | 6.806823799  | -4.805992668  | 2.651021690   |
| H309 | 6.896524211  | -4.266549349  | 4.340084187   |
| H310 | -5.204202257 | -1.245504332  | -6.296467342  |
| H311 | 6.423332141  | -8.585838949  | 5.425837506   |
| H312 | 5.541431315  | -11.229742422 | 4.130359451   |
| H313 | 0.146848559  | -0.603135709  | -3.888830807  |
| H314 | 7.046729443  | -10.742773309 | 6.580873543   |
| H315 | 5.495785012  | -11.233005994 | 6.387299977   |
| H316 | 5.537406390  | -2.570782114  | 1.882530586   |
| H317 | -0.665006204 | 1.539378720   | -4.770174033  |
| H318 | -3.435501668 | -2.548580775  | -5.307576529  |
| H319 | 8.049674134  | -9.577266528  | -1.045174989  |
| H320 | 6.951273494  | -7.573572362  | -3.561292561  |
| H321 | 6.857437161  | -7.896319205  | 0.253347644   |
| H322 | 7.331015587  | -10.382177561 | -2.150212066  |
| H323 | 4.742748158  | 2.302761558   | -9.635216973  |
| H324 | 6.590029097  | -4.817658718  | -0.223977861  |
| H325 | 2.771850136  | -7.235315075  | 1.162628098   |
| H326 | 3.257292921  | -2.164036478  | -7.541448818  |
| H327 | 3.379716626  | -9.032839632  | -0.526717473  |
| H328 | 3.446266167  | -7.070492323  | -6.931765349  |
| H329 | 2.496248138  | -5.510432844  | -5.158597038  |
| H330 | 7.228080277  | -11.662236558 | 4.434359407   |
| H331 | 5.239125774  | -0.380689018  | 1.731141038   |
| H332 | 8.654831539  | -5.394930974  | 0.868860133   |
| H333 | 7.340868154  | -3.459424114  | -0.207369388  |
| H334 | 9.334929649  | -6.216273422  | 3.021769146   |
| H335 | 4.837107192  | -2.171319679  | 5.383636601   |
| H336 | 3.302121057  | -11.787244514 | -3.235268769  |
| H337 | 3.729394560  | -8.274165007  | -3.474562648  |
| H338 | 5.093221105  | -8.347480223  | -2.340673430  |
| H339 | 2.096682957  | -8.658578699  | -1.709848102  |
| H340 | 1.360292667  | -2.370007891  | -6.048265762  |

|       |              |               |              |
|-------|--------------|---------------|--------------|
| H341  | -2.854896086 | 1.668258902   | -6.003316749 |
| H342  | -5.099018908 | 0.524200487   | -6.468278780 |
| H343  | 2.277376691  | -5.642175050  | 0.516895042  |
| H344  | 8.793923406  | -6.939610057  | 0.859656640  |
| H345  | 7.657391962  | -8.855642583  | 1.177566636  |
| H346  | 4.390008770  | -0.525379969  | 5.185212770  |
| H347  | 5.883187752  | -7.711592440  | -6.437812548 |
| H348  | 6.671032901  | -5.968304972  | -2.886281650 |
| H349  | 0.492249260  | -3.244716647  | -7.346354487 |
| H350  | 3.775334435  | 4.089376878   | -7.570251595 |
| H351  | 7.562987406  | 0.600671252   | 3.982227611  |
| H352  | 7.616528228  | 0.923514070   | 2.234227642  |
| H353  | 9.237657121  | -6.358951085  | -6.177820956 |
| H354  | 8.704719574  | -7.732491844  | -5.467628083 |
| H355  | 10.684100692 | -8.178916514  | -1.429614639 |
| H356  | 8.851287015  | -7.898637272  | -2.748995981 |
| H357  | 11.956116186 | -7.134528464  | -3.648792444 |
| H358  | 10.523857676 | -6.460967149  | -1.010547584 |
| H359  | 10.354275503 | 0.582589324   | 2.233266022  |
| H360  | -3.282621998 | 13.308084984  | 3.009309245  |
| H361  | 10.532317225 | -5.984422212  | 5.776834198  |
| H362  | 9.943647411  | -3.677138828  | 4.373367497  |
| H363  | -5.181866197 | 12.287460075  | 0.900975974  |
| H364  | -4.089516475 | 10.293260853  | 2.980704547  |
| H365  | -5.776137216 | 10.814878691  | 2.824962601  |
| H366  | -6.587145858 | 6.688280374   | -2.094056937 |
| H367  | 0.085286555  | -1.832708252  | 0.139646860  |
| H368  | 2.188256919  | -2.835500621  | -0.074942315 |
| H369  | -1.597539360 | -0.263328448  | -0.808362173 |
| M0370 | 3.871669888  | -4.331387980  | -2.394528084 |
| N371  | 2.268714773  | -0.599544161  | 1.236945390  |
| N372  | 2.293607343  | -0.108667523  | 0.220842349  |
| N373  | -6.579567653 | -7.311212193  | -0.045196490 |
| N374  | -8.689277030 | -4.830589231  | 1.778721155  |
| N375  | -8.399940835 | -5.013697574  | 4.588227302  |
| N376  | -5.782766408 | -5.994664608  | 4.914689560  |
| N377  | -4.260244967 | -3.836769896  | 3.817261460  |
| N378  | -4.902161842 | -1.831155945  | 5.724739826  |
| N379  | -4.120824579 | -2.981449643  | 8.268657928  |
| N380  | -1.523231405 | -4.206114173  | 7.999048686  |
| N381  | 0.137559675  | -2.526588000  | 6.558117367  |
| N382  | -0.385128798 | 0.442990174   | 6.860447336  |
| N383  | -0.971454096 | 0.491352572   | 9.647976902  |
| N384  | 6.203377448  | -10.593855671 | 6.022924933  |
| N385  | 6.759758728  | -8.486593991  | 4.461611498  |
| N386  | 5.246265060  | -2.631110257  | 2.862675145  |
| N387  | 4.556503719  | -1.428424852  | 4.751666593  |
| N388  | 4.950789024  | -0.343343736  | 2.731245758  |
| N389  | 9.396863549  | -6.230698615  | 4.062840997  |
| N390  | -5.791706348 | -3.318291337  | -2.616734164 |
| N391  | -1.659752299 | -5.648036161  | -2.836588484 |
| N392  | -6.180412312 | -0.789045745  | -2.053837734 |
| N393  | -8.486446903 | 0.028261422   | -0.748631056 |
| N394  | -7.720995321 | 0.199744278   | 1.906950475  |
| N395  | -5.647144974 | 2.059516717   | 2.240871122  |
| N396  | -3.280453806 | 2.385163210   | -1.248289149 |
| N397  | -2.250743057 | 0.561052829   | -0.700764003 |
| N398  | -6.412193526 | 4.688399291   | 2.676289812  |
| N399  | -9.896576794 | 7.492446840   | 1.122954915  |
| N400  | -9.877823831 | 9.356414862   | 2.325449614  |
| N401  | 9.378468704  | 2.974153208   | 2.344935038  |
| N402  | 6.108625990  | 7.829380992   | -0.539443056 |

|      |              |              |               |
|------|--------------|--------------|---------------|
| N403 | 4.073664655  | 8.556678707  | -3.404766548  |
| N404 | 1.512790143  | 7.482346616  | -3.794735752  |
| N405 | -3.088710049 | 5.833353324  | -4.764758067  |
| N406 | -2.901102833 | 7.723816140  | -6.133071745  |
| N407 | -4.217761919 | 7.794448399  | -4.230981383  |
| N408 | 0.587330128  | 6.483208890  | -1.273975255  |
| N409 | 0.793907886  | 8.825371619  | 0.273723909   |
| N410 | -0.700716798 | 11.194002647 | -0.202839186  |
| N411 | -1.978169028 | 9.958930236  | -2.862486079  |
| N412 | -3.142743459 | 11.804260711 | 0.933604811   |
| N413 | 4.127277644  | -4.889453194 | -10.185121413 |
| N414 | 2.469051949  | -2.779512460 | -7.779104223  |
| N415 | 1.261464280  | -0.019089381 | -7.288868509  |
| N416 | 3.213605223  | 2.076269634  | -7.544580850  |
| N417 | -1.717772992 | -3.491992291 | -9.919299460  |
| N418 | -3.344804449 | -1.647443847 | -8.454679096  |
| N419 | 8.423749551  | -6.779962077 | -5.720876029  |
| N420 | 4.445741198  | -5.662338457 | -4.261725732  |
| N421 | 3.977857651  | -6.730183407 | -6.135232416  |
| N422 | 9.505653413  | -7.116283428 | -2.763297186  |
| N423 | 0.031778205  | 2.492409080  | -0.649951994  |
| N424 | 0.870925034  | 1.783737214  | -0.931620966  |
| O425 | -6.457793436 | -5.245348020 | 1.952186976   |
| O426 | -7.436311678 | -2.948464275 | 4.573041592   |
| O427 | -5.787411933 | -5.181347281 | 7.052158218   |
| O428 | -2.618684135 | -4.420282321 | 5.279326408   |
| O429 | -2.896931897 | -0.863187462 | 5.254660207   |
| O430 | -3.498700132 | -0.858090760 | 8.836460460   |
| O431 | -1.219672987 | -3.883342307 | 10.249283511  |
| O432 | 1.943506435  | -3.925184137 | 6.833967863   |
| O433 | 1.865763319  | 0.270391731  | 7.186986133   |
| O434 | 0.441511544  | 2.268771738  | 9.761045387   |
| O435 | 0.882120702  | 0.365571460  | 12.711214502  |
| O436 | 7.364103086  | -9.799941630 | 2.653941181   |
| O437 | 8.317943781  | -6.701594460 | 6.037429596   |
| O438 | 11.965772392 | -3.778466517 | 4.622146599   |
| O439 | -5.590880379 | -0.977401867 | 0.155440461   |
| O440 | -3.604067769 | -4.795047679 | -3.647187918  |
| O441 | -7.956126359 | 2.233372780  | -1.031258516  |
| O442 | -6.595213667 | 2.701910505  | -3.318356864  |
| O443 | -9.801727321 | 0.967401357  | 2.509359995   |
| O444 | -5.581919916 | 1.672978878  | 4.489788136   |
| O445 | -4.310516647 | 5.213210175  | 3.408501564   |
| O446 | -6.849128402 | 7.296519584  | 5.029719436   |
| O447 | 10.544154945 | 0.240442484  | 4.237053153   |
| O448 | 3.535026573  | 5.290582648  | 3.728692874   |
| O449 | 3.430263026  | 8.777349131  | -1.230191461  |
| O450 | 0.639309328  | 9.593444013  | -4.044764861  |
| O451 | -1.524643892 | 6.901279870  | -2.046714158  |
| O452 | -0.748133840 | 7.981976429  | 1.743965523   |
| O453 | 2.275469358  | 6.210230707  | 1.242033550   |
| O454 | 0.556160762  | 12.341761049 | 1.329335202   |
| O455 | -3.233700890 | 13.835512577 | -0.096482940  |
| O456 | -3.829629396 | 11.214882123 | -2.399259859  |
| O457 | -5.300980702 | 13.561704660 | 3.202295439   |
| O458 | -5.654492148 | 6.671811859  | -1.804128154  |
| O459 | 1.865849621  | -4.849333997 | -8.586618018  |
| O460 | -0.343685419 | -1.137211271 | -8.484920976  |
| O461 | 1.611618336  | 3.449922982  | -8.422082569  |
| O462 | 6.075321465  | 3.731011721  | -9.041959865  |
| O463 | -5.004448284 | -3.199982482 | -8.654724344  |
| O464 | -1.246845950 | -6.818043814 | -5.653696857  |

|                    |                                  |              |               |               |              |
|--------------------|----------------------------------|--------------|---------------|---------------|--------------|
|                    | O465                             | 0.620353041  | -5.993750449  | -6.550996815  |              |
|                    | O466                             | -4.046899074 | 1.827108305   | -8.392524682  |              |
|                    | O467                             | 10.113571503 | -5.060751522  | -3.500908660  |              |
|                    | O468                             | 12.967456541 | -6.551806326  | -1.974631702  |              |
|                    | O469                             | -0.031000888 | -6.542301191  | -0.381153027  |              |
|                    | O470                             | 0.574528185  | -8.437965792  | 0.610990508   |              |
|                    | O471                             | 5.325930489  | -10.832347515 | -2.761221264  |              |
|                    | O472                             | 3.090778371  | -10.840412569 | -3.089066231  |              |
|                    | O473                             | 5.219712067  | -5.635098357  | -1.129225209  |              |
|                    | O474                             | 5.208747488  | -7.362125053  | 0.318972625   |              |
|                    | O475                             | 2.774630426  | -6.076344408  | -1.986691334  |              |
|                    | O476                             | 9.236474708  | -6.121324290  | 1.209089868   |              |
|                    | O477                             | 7.268932649  | -4.302107972  | 0.282132485   |              |
|                    | O478                             | -4.576865493 | 4.461068750   | -2.735919812  |              |
|                    | O479                             | 8.227919779  | -10.156489461 | -1.828940096  |              |
|                    | O480                             | 7.752204660  | -8.331578238  | 0.339849718   |              |
|                    | S481                             | 3.797075803  | 5.196321028   | -2.726281352  |              |
|                    | S482                             | 2.132921909  | 1.971102230   | -3.453679470  |              |
|                    | S483                             | 2.083014467  | -3.359674134  | -3.634727591  |              |
|                    | S484                             | 3.916790511  | 2.165374879   | -0.338269219  |              |
|                    | S485                             | -0.087509281 | -1.916385687  | -1.208834064  |              |
|                    | S486                             | 4.013307806  | -0.744815802  | -5.631724303  |              |
|                    | S487                             | 3.466586406  | -3.417921994  | -0.147373969  |              |
|                    | S488                             | 5.812873512  | 1.696361054   | -3.255568520  |              |
|                    | S489                             | 5.746675382  | -3.036372574  | -3.053446912  |              |
|                    | S490                             | 6.272434244  | -0.762287928  | -0.229917100  |              |
| <b>18, 47(5/2)</b> | <b>bm2unh2b2n2x2n2n3b2.car_3</b> |              |               |               |              |
| Fe1                | 3.18                             | C1           | -7.565860563  | -5.539744593  | 1.470982738  |
| Fe2                | -0.31                            | C2           | -7.776355324  | -6.762967073  | 0.573236865  |
| Fe3                | 2.73                             | C3           | -8.618071474  | -3.617987260  | 2.580935128  |
| Fe4                | -2.76                            | C4           | -8.093588497  | -3.831001542  | 4.000014517  |
| Fe5                | 2.18                             | C5           | -7.914520476  | -5.328442988  | 5.924659942  |
| Fe6                | 2.29                             | C6           | -6.392211142  | -5.483058445  | 6.012693704  |
| Fe7                | -2.43                            | C7           | -4.330543928  | -6.071973745  | 4.826558996  |
|                    |                                  | C8           | -3.654985761  | -4.707689388  | 4.660382697  |
|                    |                                  | C9           | -3.733755685  | -2.487320331  | 3.656029045  |
|                    |                                  | C10          | -3.802868068  | -1.651626679  | 4.943568130  |
|                    |                                  | C11          | -5.021720979  | -1.094679082  | 6.968540099  |
|                    |                                  | C12          | -4.129607169  | -1.631104594  | 8.097230280  |
|                    |                                  | C13          | -3.450214830  | -3.584408119  | 9.407545282  |
|                    |                                  | C14          | -1.956943225  | -3.896452677  | 9.254503223  |
|                    |                                  | C15          | -0.159534000  | -4.646820212  | 7.754032935  |
|                    |                                  | C16          | 0.745465075   | -3.660498765  | 7.009060977  |
|                    |                                  | C17          | 0.825217845   | -1.460991012  | 5.845901213  |
|                    |                                  | C18          | 0.826848660   | -0.178328440  | 6.694804708  |
|                    |                                  | C19          | 0.246187837   | -1.259069699  | 4.427615539  |
|                    |                                  | C20          | 0.781411068   | 0.029975868   | 3.796527023  |
|                    |                                  | C21          | 0.522652943   | -2.492323996  | 3.560186928  |
|                    |                                  | C22          | -0.460257768  | 1.717764217   | 7.574469940  |
|                    |                                  | C23          | -0.282513018  | 1.524643185   | 9.090894248  |
|                    |                                  | C24          | -1.762280143  | 2.470976448   | 7.207869055  |
|                    |                                  | C25          | -1.917102888  | 3.748895314   | 8.040638175  |
|                    |                                  | C26          | -1.791785891  | 2.808024009   | 5.710717089  |
|                    |                                  | C27          | -0.889368819  | 0.274225104   | 11.079942450 |
|                    |                                  | C28          | 0.542060416   | 0.149580770   | 11.561947995 |
|                    |                                  | C29          | 6.471580933   | -10.881903215 | 4.608314384  |
|                    |                                  | C30          | 6.916899661   | -9.655349292  | 3.811452240  |
|                    |                                  | C31          | 7.138777350   | -7.167455162  | 3.968741252  |
|                    |                                  | C32          | 8.342384330   | -6.673354275  | 4.795086500  |
|                    |                                  | C33          | 5.941440436   | -6.205393543  | 4.067588337  |
|                    |                                  | C34          | 6.255553560   | -4.781815311  | 3.598856755  |

|     |               |              |              |
|-----|---------------|--------------|--------------|
| C35 | 4.974578479   | -3.972407328 | 3.383947342  |
| C36 | 4.939248455   | -1.465474412 | 3.442884878  |
| C37 | 10.621890420  | -5.780503328 | 4.702385590  |
| C38 | 10.856729810  | -4.292042463 | 4.558112904  |
| C39 | -5.236746432  | -2.898322333 | -1.315056873 |
| C40 | -5.677748382  | -1.461836637 | -0.983214611 |
| C41 | -3.695439254  | -2.947268907 | -1.292705916 |
| C42 | -3.057442554  | -4.351169934 | -1.307745853 |
| C43 | -2.798092403  | -4.937941889 | -2.693244074 |
| C44 | -6.446831139  | 0.639398149  | -1.998812969 |
| C45 | -7.715309298  | 1.030761765  | -1.230928849 |
| C46 | -6.449569400  | 1.280150629  | -3.402284536 |
| C47 | -9.531834491  | 0.289324924  | 0.228015677  |
| C48 | -9.028081539  | 0.528275312  | 1.658849427  |
| C49 | -7.148934137  | 0.358628978  | 3.234429771  |
| C50 | -6.065496802  | 1.425229131  | 3.386309452  |
| C51 | -4.600993424  | 3.073745445  | 2.301094518  |
| C52 | -5.096580455  | 4.423321341  | 2.883170510  |
| C53 | -4.033965574  | 3.390687085  | 0.907819410  |
| C54 | -3.371472696  | 2.283441686  | 0.144450940  |
| C55 | -2.712103503  | 1.124468711  | 0.481564353  |
| C56 | -2.592295952  | 1.334678917  | -1.722552387 |
| C57 | -7.020462456  | 5.980044817  | 2.985753158  |
| C58 | -6.987582826  | 6.207424598  | 4.494978707  |
| C59 | -8.477316989  | 5.954363180  | 2.467028119  |
| C60 | -9.123149949  | 7.290743066  | 2.242483355  |
| C61 | -9.102838558  | 8.445660451  | 3.000280167  |
| C62 | -10.345084103 | 8.732338642  | 1.187907771  |
| C63 | 9.090881808   | 1.997361745  | 3.413616088  |
| C64 | 10.077096510  | 0.850024537  | 3.302098971  |
| C65 | 7.674019671   | 1.393337051  | 3.246024970  |
| C66 | 6.578007477   | 2.422102594  | 3.399042435  |
| C67 | 5.999855564   | 2.692957725  | 4.653341420  |
| C68 | 6.104365630   | 3.141513016  | 2.286760784  |
| C69 | 4.983325812   | 3.643999181  | 4.797205654  |
| C70 | 5.103127111   | 4.102701697  | 2.417115944  |
| C71 | 4.537573972   | 4.348536026  | 3.671148351  |
| C72 | 5.336789047   | 7.333551210  | -1.676792371 |
| C73 | 4.199129823   | 8.285463904  | -2.068846466 |
| C74 | 4.759840643   | 5.956472427  | -1.312460643 |
| C75 | 3.028492917   | 9.417092262  | -3.907810111 |
| C76 | 1.617989923   | 8.826702388  | -3.908747411 |
| C77 | 0.224767533   | 6.802944324  | -3.709298506 |
| C78 | -0.314563558  | 6.727618163  | -2.266021198 |
| C79 | 0.335180317   | 5.419968541  | -4.376306824 |
| C80 | -0.938881580  | 4.569232759  | -4.442867129 |
| C81 | -2.042243587  | 5.039890393  | -5.409912186 |
| C82 | -3.416900313  | 7.097411444  | -5.063621058 |
| C83 | 0.135707500   | 6.435611145  | 0.115029079  |
| C84 | 0.004829652   | 7.823597933  | 0.774108465  |
| C85 | 1.023689734   | 5.556748507  | 1.001723699  |
| C86 | 1.060231578   | 10.011742313 | 1.067532988  |
| C87 | 0.287292500   | 11.285777283 | 0.736882976  |
| C88 | -1.383365494  | 12.387828991 | -0.695899863 |
| C89 | -2.671855113  | 12.747316025 | 0.073872568  |
| C90 | -1.663238397  | 12.289536439 | -2.213302710 |
| C91 | -2.596040525  | 11.128192425 | -2.533725174 |
| C92 | -4.413433955  | 11.966295558 | 1.619270116  |
| C93 | -4.316220514  | 13.044164899 | 2.694755172  |
| C94 | -4.852370348  | 10.620983504 | 2.257211397  |
| C95 | -5.089346967  | 9.539017323  | 1.228270839  |
| C96 | -6.317489073  | 9.449597982  | 0.554820074  |

|       |              |               |              |
|-------|--------------|---------------|--------------|
| C97   | -4.078345779 | 8.622624832   | 0.890530304  |
| C98   | -6.530576699 | 8.488504466   | -0.435344250 |
| C99   | -4.265409799 | 7.668575951   | -0.113470265 |
| C100  | -5.493941001 | 7.615321643   | -0.768817654 |
| C101  | 4.132048877  | -4.107363788  | -8.936832724 |
| C102  | 2.713767916  | -3.931301295  | -8.421994923 |
| C103  | 1.199949780  | -2.436688379  | -7.137614520 |
| C104  | 0.623388032  | -1.132589891  | -7.695653305 |
| C105  | 0.859762077  | 1.302668335   | -7.756863090 |
| C106  | 1.942599731  | 2.361489705   | -7.936352644 |
| C107  | 4.244765959  | 3.102662276   | -7.594785186 |
| C108  | 5.085122105  | 3.044074405   | -8.854853841 |
| C109  | -2.724770337 | -3.980477032  | -8.967644695 |
| C110  | -3.790894894 | -2.913497347  | -8.686584784 |
| C111  | -2.200879356 | -4.556063348  | -7.632259176 |
| C112  | -1.423008901 | -5.866186049  | -7.855750044 |
| C113  | -0.691809631 | -6.280023658  | -6.597702709 |
| C114  | -4.266574040 | -0.581487774  | -8.108226827 |
| C115  | -3.850795275 | 0.695896874   | -8.812002165 |
| C116  | -4.550462425 | -0.423868115  | -6.593488136 |
| C117  | -3.297854462 | -0.437547282  | -5.753911884 |
| C118  | -2.520988082 | 0.722024655   | -5.576479077 |
| C119  | -2.831000010 | -1.644374601  | -5.206438114 |
| C120  | -1.294285195 | 0.656666148   | -4.904538627 |
| C121  | -1.603735271 | -1.709228012  | -4.537770313 |
| C122  | -0.821042783 | -0.557963330  | -4.399380202 |
| C123  | 8.116842558  | -6.012199161  | -4.505363528 |
| C124  | 9.310432898  | -6.010292027  | -3.535072784 |
| C125  | 6.824515435  | -6.518502988  | -3.842849568 |
| C126  | 5.579215671  | -6.400365196  | -4.667040982 |
| C127  | 5.292291718  | -7.063366599  | -5.842688378 |
| C128  | 3.516440816  | -5.906634120  | -5.200877327 |
| C129  | 10.637650580 | -7.163724342  | -1.853711552 |
| C130  | 11.953088707 | -6.910180696  | -2.556453275 |
| C131  | 0.875267699  | -7.176542301  | 0.146948039  |
| C132  | 2.298501721  | -6.722291974  | 0.315059478  |
| C133  | 3.190282828  | -6.935110734  | -0.974631174 |
| C134  | 3.133565731  | -8.431201600  | -1.392131759 |
| C135  | 4.095593090  | -8.756481957  | -2.545041777 |
| C136  | 4.262337092  | -10.228375537 | -2.795282442 |
| C137  | 4.659418409  | -6.636715214  | -0.539863731 |
| C138  | 3.593913206  | -0.653435594  | -2.256084993 |
| Fe139 | 3.854986854  | -1.977010391  | -3.766830052 |
| Fe140 | 2.325437110  | 0.785091513   | -1.352107676 |
| Fe141 | 4.974853374  | 0.590087554   | -1.483390234 |
| Fe142 | 3.942344586  | 0.552362876   | -3.851363451 |
| Fe143 | 3.919820229  | 2.881911218   | -2.566076361 |
| Fe144 | 4.789631740  | -1.952225601  | -1.373809486 |
| Fe145 | 2.128479507  | -2.032089021  | -1.896941306 |
| H146  | -5.852942681 | -7.436812473  | 0.659814607  |
| H147  | -6.202682934 | -6.645983864  | -0.725713173 |
| H148  | -9.560611733 | -5.057347118  | 1.308593708  |
| H149  | -8.516795646 | -6.523728410  | -0.205251338 |
| H150  | -8.242892398 | -7.536190080  | 1.209372326  |
| H151  | -7.955617588 | -2.873746920  | 2.115902466  |
| H152  | -8.964239342 | -5.688632088  | 4.080529829  |
| H153  | -9.626996035 | -3.188505543  | 2.644599377  |
| H154  | -8.384088669 | -6.266041181  | 6.251063236  |
| H155  | -6.319793466 | -6.100290368  | 4.056845947  |
| H156  | -8.195251659 | -4.536704174  | 6.631745757  |
| H157  | -2.677695763 | -2.511382140  | 3.35553912   |
| H158  | -5.064470460 | -4.133236042  | 3.260100323  |

|      |              |              |               |
|------|--------------|--------------|---------------|
| H159 | -4.066892347 | -6.712309939 | 3.973415029   |
| H160 | -4.748506330 | -0.043350857 | 6.810927302   |
| H161 | -5.678006227 | -2.404578236 | 5.390434401   |
| H162 | -3.924441367 | -6.525275837 | 5.738931475   |
| H163 | -4.305418121 | -1.989732912 | 2.859253122   |
| H164 | -4.718016308 | -3.574119352 | 7.688662886   |
| H165 | -6.069958234 | -1.138694270 | 7.294489409   |
| H166 | 0.115394957  | -3.403636035 | 4.022994886   |
| H167 | 0.053252243  | -2.375022164 | 2.571167624   |
| H168 | 1.600986895  | -2.633597433 | 3.396090463   |
| H169 | -0.846039110 | -1.160055241 | 4.529352530   |
| H170 | -3.960327208 | -4.530059767 | 9.640919830   |
| H171 | -1.784841539 | 1.910458343  | 5.076264826   |
| H172 | -1.667874690 | -0.025223760 | 9.117460151   |
| H173 | -1.952718868 | 3.545587731  | 9.120351090   |
| H174 | 0.348318575  | 0.169330308  | 2.795922844   |
| H175 | 1.872689522  | -0.005981152 | 3.673789423   |
| H176 | 9.168476666  | 2.401243858  | 4.441140663   |
| H177 | -2.701888934 | 3.375891132  | 5.469282648   |
| H178 | -2.847503588 | 4.262536566  | 7.757225849   |
| H179 | -0.923019863 | 3.429296230  | 5.437647508   |
| H180 | -1.078603197 | 4.438901414  | 7.855405991   |
| H181 | -2.612307920 | 1.802306641  | 7.435332167   |
| H182 | 0.401465645  | 2.333372825  | 7.271937286   |
| H183 | -1.206027048 | 0.093358365  | 6.377307349   |
| H184 | 0.527141738  | 0.915334278  | 4.395944102   |
| H185 | 1.179129400  | 4.586423514  | 0.500049921   |
| H186 | 0.473418856  | 5.384400273  | 1.940832486   |
| H187 | 2.637142550  | 5.849867190  | 2.082007198   |
| H188 | 3.180282224  | 5.341297867  | 4.642854083   |
| H189 | 4.726744970  | 4.628848662  | 1.539665956   |
| H190 | 6.496406982  | 2.922651254  | 1.291251733   |
| H191 | 6.344177111  | 2.148113127  | 5.536990044   |
| H192 | -0.859374782 | -2.439542881 | 6.737100913   |
| H193 | -0.164357347 | -5.582437523 | 7.175593663   |
| H194 | 0.314399814  | -4.848382415 | 8.723813414   |
| H195 | -2.192710641 | -4.302505560 | 7.229023143   |
| H196 | -3.538988077 | -2.922163671 | 10.278661039  |
| H197 | 4.533084584  | 3.827361981  | 5.777005196   |
| H198 | 1.877211033  | -1.767936426 | 5.776992258   |
| H199 | -1.393756371 | 1.059409619  | 11.667279166  |
| H200 | -1.387632482 | -0.683860903 | 11.297403014  |
| H201 | 1.267643809  | -0.219276367 | 10.799401518  |
| H202 | 11.496959979 | -6.327757131 | 4.320738935   |
| H203 | -1.447875167 | -6.070437160 | -3.737879575  |
| H204 | 1.374943265  | -8.814583316 | 1.032020968   |
| H205 | -2.130218855 | -6.666938938 | -8.117311837  |
| H206 | -0.711337044 | -5.746767235 | -8.685866100  |
| H207 | -3.039063167 | -4.750944671 | -6.945444701  |
| H208 | -3.363339366 | 0.532006070  | -9.801649428  |
| H209 | -3.286969011 | -4.780028737 | -9.474577103  |
| H210 | -3.310539665 | -2.353249355 | -2.136183826  |
| H211 | -3.696559504 | -5.069522125 | -0.764420731  |
| H212 | -2.331366716 | -1.465276225 | -8.402052024  |
| H213 | -5.222660594 | -0.863927658 | -8.593876235  |
| H214 | -1.045199071 | -2.860862360 | -9.454483094  |
| H215 | -0.985246532 | -5.742578200 | -2.069916665  |
| H216 | -1.564664462 | -3.800927046 | -7.145106113  |
| H217 | -1.172163819 | -4.283379683 | -10.275025337 |
| H218 | -6.645934235 | -3.853637950 | -2.485221308  |
| H219 | -3.368675538 | -2.443958895 | -0.371644648  |
| H220 | 0.960205935  | -5.534802702 | -7.372127150  |



|      |               |              |              |
|------|---------------|--------------|--------------|
| H221 | -2.104843926  | -4.304185274 | -0.761604056 |
| H222 | -3.805360630  | 2.730108556  | 2.977223254  |
| H223 | -2.538046671  | 0.662432184  | 1.446907208  |
| H224 | -7.959963623  | 0.623625347  | 3.926011961  |
| H225 | -7.148492028  | -0.240339269 | 1.184034402  |
| H226 | -6.999493040  | 3.951897922  | 2.289894166  |
| H227 | -8.603189764  | 8.706213049  | 3.926742684  |
| H228 | -7.124297813  | 5.273369017  | 5.093878846  |
| H229 | -9.090154292  | 5.326516822  | 3.138534015  |
| H230 | -6.453536651  | 6.786422057  | 2.495586753  |
| H231 | -10.986193419 | 9.230144008  | 0.464133393  |
| H232 | -3.307296493  | 4.208371123  | 1.044389291  |
| H233 | -4.846615530  | 3.800525622  | 0.285718865  |
| H234 | -10.068308978 | 10.310267655 | 2.588970281  |
| H235 | -8.468484265  | 5.446127979  | 1.490059548  |
| H236 | -6.005733122  | 1.744909943  | 1.348716499  |
| H237 | -6.729494956  | -0.596408009 | 3.584533885  |
| H238 | -10.107994363 | 1.177099651  | -0.061259836 |
| H239 | -2.336123365  | 1.149244459  | -2.763045988 |
| H240 | -10.218921664 | -0.566869602 | 0.242658473  |
| H241 | 10.199371379  | 3.521419148  | 2.610113437  |
| H242 | 8.600755166   | 3.640504696  | 2.294425316  |
| H243 | 1.538897585   | 6.178068937  | -1.514719901 |
| H244 | -0.874656220  | 6.002731318  | 0.121800619  |
| H245 | 1.522774964   | 8.562158581  | -0.393843265 |
| H246 | -3.672590031  | 3.172889286  | -1.802794441 |
| H247 | -5.316885126  | 3.877740878  | -3.041936107 |
| H248 | -4.981953176  | 5.180798987  | -2.192880167 |
| H249 | -5.493686694  | 1.065298140  | -3.899223791 |
| H250 | -7.265718822  | 0.852619987  | -4.008731884 |
| H251 | -0.699634993  | 12.193846090 | -2.735385765 |
| H252 | -2.145543317  | 13.224878175 | -2.525791323 |
| H253 | -1.003296869  | 9.911448769  | -3.189994021 |
| H254 | -2.557582843  | 9.138607443  | -3.004869025 |
| H255 | -3.149436224  | 8.700067093  | -6.310214469 |
| H256 | -2.534742747  | 4.169110020  | -5.867567556 |
| H257 | -7.496312723  | 8.425096697  | -0.943776406 |
| H258 | -3.118115137  | 8.636400740  | 1.415075563  |
| H259 | -4.622738878  | 7.356163560  | -3.408113800 |
| H260 | 1.102531470   | 4.830617635  | -3.848829942 |
| H261 | 2.361995145   | 6.921964817  | -3.604632726 |
| H262 | -1.365739616  | 4.419829926  | -3.438539167 |
| H263 | -8.233152151  | -0.917911176 | -0.987824788 |
| H264 | 3.274729256   | 9.701180439  | -4.940127292 |
| H265 | -6.205518153  | -1.356584414 | -2.908701104 |
| H266 | 0.713937259   | 5.580707883  | -5.399198472 |
| H267 | -3.450242226  | 7.004638425  | -0.407185768 |
| H268 | -7.225363256  | 2.865259991  | -2.571432617 |
| H269 | 2.977427806   | 10.337203294 | -3.309908795 |
| H270 | -2.539989467  | 7.204239640  | -6.925307118 |
| H271 | -4.744204189  | 8.585657627  | -4.617169810 |
| H272 | -5.095343891  | -3.900909969 | -3.106838705 |
| H273 | -5.602889253  | -3.514522816 | -0.471631435 |
| H274 | -7.127160159  | 10.139610672 | 0.805553210  |
| H275 | -5.639452384  | 1.116012275  | -1.418005895 |
| H276 | -0.500518713  | 7.428814646  | -4.247084899 |
| H277 | -1.592081918  | 5.607805998  | -6.233398116 |
| H278 | -0.614607556  | 3.577275150  | -4.784778752 |
| H279 | -3.616496542  | 5.377401209  | -4.003558728 |
| H280 | 0.864817469   | 9.792763654  | 2.127918590  |
| H281 | -0.787353271  | 10.317026709 | -0.719875687 |
| H282 | -0.705594936  | 13.237625899 | -0.528302277 |

|      |              |               |               |
|------|--------------|---------------|---------------|
| H283 | 2.125310931  | 10.260589638  | 0.966380728   |
| H284 | -2.634525863 | 10.929966125  | 1.003533817   |
| H285 | 4.593190104  | -3.125068932  | -9.114968641  |
| H286 | 4.696714650  | -4.581392458  | -8.107217694  |
| H287 | 7.976276595  | -4.960435327  | -4.795277124  |
| H288 | 5.084070145  | -5.182087517  | -10.384638504 |
| H289 | 3.586498924  | -5.739028858  | -10.022776785 |
| H290 | 5.593886243  | 5.289814417   | -1.058462802  |
| H291 | 5.470403722  | 8.101428591   | 0.207341592   |
| H292 | 4.691785746  | 8.079059895   | -4.051637010  |
| H293 | 4.101374798  | 6.057824114   | -0.437390476  |
| H294 | 6.584466831  | 8.713395690   | -0.819111986  |
| H295 | 4.903799221  | 3.012271638   | -6.717118080  |
| H296 | 6.019591132  | 7.210796900   | -2.532202401  |
| H297 | 5.584509163  | -6.193321267  | 5.110920155   |
| H298 | 7.427273286  | -7.280622556  | 2.916350647   |
| H299 | 3.437650395  | 1.210065670   | -7.048191547  |
| H300 | 4.957824832  | 0.565321790   | 3.170073950   |
| H301 | 0.362323391  | 1.177541406   | -8.727931984  |
| H302 | -1.254439463 | -2.659037956  | -4.127023423  |
| H303 | 0.110347379  | 1.744610741   | -7.079587591  |
| H304 | 4.391039496  | -3.888240904  | 4.310332423   |
| H305 | 1.987429349  | -0.124428449  | -6.558672291  |
| H306 | 4.330994140  | -4.485540369  | 2.651112697   |
| H307 | 5.137889893  | -6.634916493  | 3.447424754   |
| H308 | 6.800988219  | -4.807072481  | 2.642950506   |
| H309 | 6.896975539  | -4.265425431  | 4.331533489   |
| H310 | -5.207315072 | -1.253130314  | -6.293349509  |
| H311 | 6.420120168  | -8.584467044  | 5.423208394   |
| H312 | 5.549946299  | -11.241952370 | 4.125369456   |
| H313 | 0.144387989  | -0.594430149  | -3.889150715  |
| H314 | 7.034437263  | -10.734809588 | 6.584301536   |
| H315 | 5.489347351  | -11.238879892 | 6.381607868   |
| H316 | 5.532169058  | -2.574761241  | 1.875179784   |
| H317 | -0.679093520 | 1.548453327   | -4.772229000  |
| H318 | -3.433152130 | -2.550562109  | -5.302174810  |
| H319 | 8.046648356  | -9.574996684  | -1.038748403  |
| H320 | 6.959140821  | -7.583606641  | -3.581860483  |
| H321 | 6.864057748  | -7.890903025  | 0.252276324   |
| H322 | 7.325825047  | -10.383034327 | -2.141489087  |
| H323 | 4.736615498  | 2.316831839   | -9.628602927  |
| H324 | 6.614151441  | -4.819430327  | -0.252242070  |
| H325 | 2.780537964  | -7.232236325  | 1.162565373   |
| H326 | 3.250048975  | -2.154856918  | -7.552128858  |
| H327 | 3.398097775  | -9.044054323  | -0.515879189  |
| H328 | 3.461468689  | -7.080679636  | -6.957195288  |
| H329 | 2.508607585  | -5.513099873  | -5.191165228  |
| H330 | 7.238757069  | -11.657098774 | 4.441470129   |
| H331 | 5.229762360  | -0.385259420  | 1.713515083   |
| H332 | 8.666559621  | -5.390733662  | 0.863818521   |
| H333 | 7.325775738  | -3.440131146  | -0.196538691  |
| H334 | 9.337874277  | -6.215382098  | 3.025280234   |
| H335 | 4.853137909  | -2.157584802  | 5.378245099   |
| H336 | 3.294954332  | -11.797485699 | -3.225325949  |
| H337 | 3.723327697  | -8.282691171  | -3.465798182  |
| H338 | 5.096590893  | -8.358921099  | -2.342633937  |
| H339 | 2.105413686  | -8.681539462  | -1.691674993  |
| H340 | 1.360842060  | -2.364911926  | -6.050107923  |
| H341 | -2.870807458 | 1.669007875   | -5.995583563  |
| H342 | -5.107255584 | 0.516921416   | -6.464850034  |
| H343 | 2.290297199  | -5.641687971  | 0.508695526   |
| H344 | 8.800146304  | -6.936067007  | 0.864274312   |

|       |              |               |              |
|-------|--------------|---------------|--------------|
| H345  | 7.658032147  | -8.852656698  | 1.179486033  |
| H346  | 4.400392429  | -0.514076646  | 5.173251313  |
| H347  | 5.896339092  | -7.723026967  | -6.453237435 |
| H348  | 6.670249456  | -5.983721570  | -2.897744922 |
| H349  | 0.487860323  | -3.238530379  | -7.344285447 |
| H350  | 3.769294877  | 4.095969562   | -7.558721756 |
| H351  | 7.559044819  | 0.601840882   | 4.001586983  |
| H352  | 7.612435589  | 0.919706338   | 2.252870356  |
| H353  | 9.250349618  | -6.347133053  | -6.182018172 |
| H354  | 8.717360984  | -7.724678731  | -5.480098259 |
| H355  | 10.681897127 | -8.178840397  | -1.429227142 |
| H356  | 8.846905911  | -7.894934254  | -2.745665979 |
| H357  | 11.959600362 | -7.141952463  | -3.648822483 |
| H358  | 10.525808935 | -6.460131453  | -1.012946020 |
| H359  | 10.354923554 | 0.583484404   | 2.253497173  |
| H360  | -3.278827340 | 13.290453575  | 3.023380490  |
| H361  | 10.532635326 | -5.990577434  | 5.782341529  |
| H362  | 9.937534488  | -3.678901881  | 4.389567945  |
| H363  | -5.183049310 | 12.291539098  | 0.900464649  |
| H364  | -4.084789794 | 10.297512239  | 2.977809389  |
| H365  | -5.772221855 | 10.818042875  | 2.826565673  |
| H366  | -6.583453704 | 6.691714016   | -2.094029343 |
| H367  | 0.090767029  | -1.842393166  | 0.137205920  |
| H368  | 2.199243591  | -2.882138118  | -0.066414970 |
| H369  | -1.598593526 | -0.269690222  | -0.800244359 |
| Mo370 | 3.870701045  | -4.355123552  | -2.419123797 |
| N371  | 2.286638161  | -0.616919920  | 1.223307016  |
| N372  | 2.287648453  | -0.118758417  | 0.210385897  |
| N373  | -6.581842878 | -7.311008260  | -0.047495568 |
| N374  | -8.687968805 | -4.830582110  | 1.779197439  |
| N375  | -8.396793572 | -5.014190956  | 4.588128435  |
| N376  | -5.780465745 | -5.992834068  | 4.914834919  |
| N377  | -4.258573673 | -3.836129811  | 3.812233785  |
| N378  | -4.898846133 | -1.830380695  | 5.720449058  |
| N379  | -4.117564340 | -2.979325963  | 8.265581021  |
| N380  | -1.524252362 | -4.211017439  | 8.000453351  |
| N381  | 0.140144823  | -2.529360770  | 6.567273407  |
| N382  | -0.377568024 | 0.441143741   | 6.863068082  |
| N383  | -0.972587394 | 0.500270971   | 9.651246554  |
| N384  | 6.193513860  | -10.593874628 | 6.020504926  |
| N385  | 6.758352894  | -8.486505389  | 4.459698272  |
| N386  | 5.244204867  | -2.631755748  | 2.856569703  |
| N387  | 4.564591161  | -1.419741154  | 4.744068880  |
| N388  | 4.950783269  | -0.344831885  | 2.716794640  |
| N389  | 9.398104064  | -6.232785721  | 4.066331067  |
| N390  | -5.789370458 | -3.310387154  | -2.611019776 |
| N391  | -1.660109491 | -5.644419467  | -2.830224779 |
| N392  | -6.178418606 | -0.781983107  | -2.049370397 |
| N393  | -8.486681823 | 0.037389736   | -0.747037251 |
| N394  | -7.725001770 | 0.202193576   | 1.910016659  |
| N395  | -5.648519329 | 2.060715433   | 2.246787985  |
| N396  | -3.283053098 | 2.379819765   | -1.240257293 |
| N397  | -2.253168211 | 0.555632415   | -0.692171958 |
| N398  | -6.412982198 | 4.687674329   | 2.676591803  |
| N399  | -9.903670596 | 7.482664099   | 1.113980227  |
| N400  | -9.881116049 | 9.350809106   | 2.309860915  |
| N401  | 9.373877293  | 2.972397467   | 2.358547170  |
| N402  | 6.120374271  | 7.843307662   | -0.542580499 |
| N403  | 4.077478603  | 8.557532049   | -3.397753932 |
| N404  | 1.514545598  | 7.484204020   | -3.791994674 |
| N405  | -3.090282205 | 5.841979569   | -4.766097717 |
| N406  | -2.908393530 | 7.729136405   | -6.140136587 |

|      |              |              |               |
|------|--------------|--------------|---------------|
| N407 | -4.220010495 | 7.803009051  | -4.234639910  |
| N408 | 0.585392234  | 6.479830611  | -1.274551414  |
| N409 | 0.789257898  | 8.821029672  | 0.273370611   |
| N410 | -0.700806573 | 11.193307890 | -0.202296258  |
| N411 | -1.977085441 | 9.964837656  | -2.867947467  |
| N412 | -3.143183677 | 11.807281920 | 0.929336339   |
| N413 | 4.127512648  | -4.883843376 | -10.180644742 |
| N414 | 2.462796151  | -2.771782762 | -7.785067922  |
| N415 | 1.259868360  | -0.013172529 | -7.290803761  |
| N416 | 3.210877547  | 2.083820897  | -7.538267251  |
| N417 | -1.711776124 | -3.494446879 | -9.912849030  |
| N418 | -3.339242859 | -1.650218137 | -8.443914979  |
| N419 | 8.435183645  | -6.771792393 | -5.730613930  |
| N420 | 4.451787668  | -5.671472847 | -4.283684765  |
| N421 | 3.990654648  | -6.738554749 | -6.159607563  |
| N422 | 9.505726738  | -7.116502964 | -2.764469594  |
| N423 | 0.041173362  | 2.499898321  | -0.654584205  |
| N424 | 0.871461275  | 1.782021218  | -0.938670437  |
| O425 | -6.455044050 | -5.241987878 | 1.948176731   |
| O426 | -7.434951557 | -2.948053754 | 4.573044245   |
| O427 | -5.784624088 | -5.179915140 | 7.052546770   |
| O428 | -2.617665305 | -4.416483348 | 5.276465208   |
| O429 | -2.897741169 | -0.857213259 | 5.243512758   |
| O430 | -3.494380376 | -0.855602601 | 8.831552825   |
| O431 | -1.223160884 | -3.894542745 | 10.251876794  |
| O432 | 1.941835662  | -3.934741287 | 6.833807577   |
| O433 | 1.872234201  | 0.263610241  | 7.193041512   |
| O434 | 0.455094566  | 2.265881419  | 9.760534464   |
| O435 | 0.878235928  | 0.367789133  | 12.716476083  |
| O436 | 7.360763300  | -9.801088000 | 2.652490619   |
| O437 | 8.313019483  | -6.700253771 | 6.038275720   |
| O438 | 11.960468420 | -3.776079669 | 4.634672856   |
| O439 | -5.587164593 | -0.967484556 | 0.159797375   |
| O440 | -3.602626102 | -4.788551649 | -3.642226253  |
| O441 | -7.956853243 | 2.241827097  | -1.034832007  |
| O442 | -6.591357421 | 2.706904457  | -3.318854428  |
| O443 | -9.802238736 | 0.981272595  | 2.509258607   |
| O444 | -5.603690597 | 1.690600595  | 4.498847702   |
| O445 | -4.312357128 | 5.216881937  | 3.409710597   |
| O446 | -6.861056542 | 7.295469473  | 5.027806730   |
| O447 | 10.530603510 | 0.235546904  | 4.257329217   |
| O448 | 3.524848408  | 5.285818200  | 3.732651902   |
| O449 | 3.431673489  | 8.783350400  | -1.224337900  |
| O450 | 0.645365334  | 9.596534020  | -4.050320441  |
| O451 | -1.525281314 | 6.904351454  | -2.048263619  |
| O452 | -0.757310128 | 7.978031158  | 1.739366387   |
| O453 | 2.266374793  | 6.218818377  | 1.254178099   |
| O454 | 0.560452384  | 12.337908198 | 1.328637872   |
| O455 | -3.226950051 | 13.841661102 | -0.095834200  |
| O456 | -3.825863399 | 11.223296919 | -2.400844555  |
| O457 | -5.294402534 | 13.580448997 | 3.188689168   |
| O458 | -5.650669670 | 6.675986711  | -1.804514829  |
| O459 | 1.867878483  | -4.849651350 | -8.576277148  |
| O460 | -0.347860633 | -1.129081203 | -8.483352077  |
| O461 | 1.611527955  | 3.456814594  | -8.420879610  |
| O462 | 6.073504914  | 3.738450046  | -9.031044198  |
| O463 | -4.998920211 | -3.201086311 | -8.653678133  |
| O464 | -1.245673756 | -6.815368381 | -5.641667803  |
| O465 | 0.622413891  | -5.993698289 | -6.539482574  |
| O466 | -4.052867880 | 1.823620615  | -8.385220625  |
| O467 | 10.122868112 | -5.067103087 | -3.510322653  |
| O468 | 12.966736845 | -6.550254857 | -1.975289896  |

|                    |                                   |              |               |               |              |
|--------------------|-----------------------------------|--------------|---------------|---------------|--------------|
|                    | O469                              | -0.022698047 | -6.537079906  | -0.379509200  |              |
|                    | O470                              | 0.575979290  | -8.427996524  | 0.625509770   |              |
|                    | O471                              | 5.324220643  | -10.845870499 | -2.762875715  |              |
|                    | O472                              | 3.087493888  | -10.849363785 | -3.082707348  |              |
|                    | O473                              | 5.229092203  | -5.650806023  | -1.153754195  |              |
|                    | O474                              | 5.220605085  | -7.358711953  | 0.316619958   |              |
|                    | O475                              | 2.782309162  | -6.097029463  | -1.998085915  |              |
|                    | O476                              | 9.242874700  | -6.117161476  | 1.211628038   |              |
|                    | O477                              | 7.286658846  | -4.303647795  | 0.260357433   |              |
|                    | O478                              | -4.572517841 | 4.465323339   | -2.735888061  |              |
|                    | O479                              | 8.223039338  | -10.157038112 | -1.821192831  |              |
|                    | O480                              | 7.758011720  | -8.327956923  | 0.342781301   |              |
|                    | S481                              | 3.782272874  | 5.201202089   | -2.691385803  |              |
|                    | S482                              | 2.148048463  | 1.858061818   | -3.516131875  |              |
|                    | S483                              | 2.080629636  | -3.383051708  | -3.644502116  |              |
|                    | S484                              | 3.847090531  | 2.219118767   | -0.359556594  |              |
|                    | S485                              | -0.100353767 | -1.905081377  | -1.209258561  |              |
|                    | S486                              | 4.037900535  | -0.764407019  | -5.644314974  |              |
|                    | S487                              | 3.483029358  | -3.438971986  | -0.169960608  |              |
|                    | S488                              | 5.751615444  | 1.738026554   | -3.338042529  |              |
|                    | S489                              | 5.736496759  | -3.039936914  | -3.074931443  |              |
|                    | S490                              | 6.258766280  | -0.768234295  | -0.228779219  |              |
| <b>19, 47(3/2)</b> | <b>bm12unh2b2n2x6n2n3b2.car_3</b> |              |               |               |              |
| Fe1                | 2.77                              | C1           | -6.912016487  | -6.356245205  | 1.099614640  |
| Fe2                | -1.08                             | C2           | -6.971348357  | -7.539709985  | 0.128616875  |
| Fe3                | 2.87                              | C3           | -8.186496638  | -4.578955673  | 2.227756609  |
| Fe4                | -2.09                             | C4           | -7.711518436  | -4.793094338  | 3.662760621  |
| Fe5                | 2.50                              | C5           | -7.425578834  | -6.326279951  | 5.540102247  |
| Fe6                | 0.38                              | C6           | -5.898010031  | -6.375903015  | 5.659606309  |
| Fe7                | -1.97                             | C7           | -3.771775022  | -6.703356081  | 4.488544655  |
|                    |                                   | C8           | -3.225990845  | -5.273747393  | 4.410877887  |
|                    |                                   | C9           | -3.499247211  | -3.015914176  | 3.529619104  |
|                    |                                   | C10          | -3.687247608  | -2.277344346  | 4.864512034  |
|                    |                                   | C11          | -5.028328641  | -1.930499292  | 6.853295291  |
|                    |                                   | C12          | -4.099860094  | -2.422306251  | 7.971714368  |
|                    |                                   | C13          | -3.198372942  | -4.349022241  | 9.178419637  |
|                    |                                   | C14          | -1.672329173  | -4.443591539  | 9.047555652  |
|                    |                                   | C15          | 0.232381834   | -4.911864322  | 7.562633031  |
|                    |                                   | C16          | 1.014145293   | -3.779812190  | 6.887941439  |
|                    |                                   | C17          | 0.838867008   | -1.570183451  | 5.766076714  |
|                    |                                   | C18          | 0.681107011   | -0.316429089  | 6.645345570  |
|                    |                                   | C19          | 0.270130728   | -1.400275346  | 4.338634411  |
|                    |                                   | C20          | 0.636581256   | -0.032132001  | 3.761531403  |
|                    |                                   | C21          | 0.745057822   | -2.548882700  | 3.442081959  |
|                    |                                   | C22          | -0.838751468  | 1.352025029   | 7.613360414  |
|                    |                                   | C23          | -0.653414920  | 1.105331872   | 9.120833569  |
|                    |                                   | C24          | -2.218703385  | 1.957974085   | 7.260503219  |
|                    |                                   | C25          | -2.538647670  | 3.164993382   | 8.150103474  |
|                    |                                   | C26          | -2.266851349  | 2.361582117   | 5.780578912  |
|                    |                                   | C27          | -1.112732086  | -0.300129113  | 11.041681050 |
|                    |                                   | C28          | 0.329216643   | -0.310186175  | 11.507017207 |
|                    |                                   | C29          | 7.477724245   | -10.319129159 | 4.203646341  |
|                    |                                   | C30          | 7.878718579   | -9.013332101  | 3.519779770  |
|                    |                                   | C31          | 7.813582975   | -6.532978931  | 3.817123146  |
|                    |                                   | C32          | 8.952387530   | -5.955472691  | 4.678331568  |
|                    |                                   | C33          | 6.518827236   | -5.714443949  | 3.957953188  |
|                    |                                   | C34          | 6.678004731   | -4.242954529  | 3.572993184  |
|                    |                                   | C35          | 5.318376857   | -3.558155132  | 3.440034347  |
|                    |                                   | C36          | 4.978468601   | -1.078757060  | 3.627386355  |
|                    |                                   | C37          | 11.101688303  | -4.782723284  | 4.647328871  |
|                    |                                   | C38          | 11.179604180  | -3.274339362  | 4.567962883  |

|      |               |              |              |
|------|---------------|--------------|--------------|
| C39  | -4.859579527  | -3.346869707 | -1.546760175 |
| C40  | -5.468439049  | -1.995181704 | -1.131037703 |
| C41  | -3.324877333  | -3.222185681 | -1.507848213 |
| C42  | -2.536206475  | -4.548154729 | -1.534833286 |
| C43  | -2.199013157  | -5.089479861 | -2.921126656 |
| C44  | -6.370227699  | 0.124249733  | -2.049675611 |
| C45  | -7.629820163  | 0.341351931  | -1.207450749 |
| C46  | -6.456344800  | 0.722968074  | -3.481273823 |
| C47  | -9.485642975  | -0.740154151 | -0.027546876 |
| C48  | -9.042007577  | -0.520024148 | 1.426925501  |
| C49  | -7.199996576  | -0.530600514 | 3.050115803  |
| C50  | -6.235090838  | 0.636290868  | 3.267515248  |
| C51  | -4.964856068  | 2.511417884  | 2.324665205  |
| C52  | -5.610744236  | 3.738034779  | 3.001087102  |
| C53  | -4.443396943  | 2.993270642  | 0.960733043  |
| C54  | -3.686783572  | 2.002537213  | 0.127471933  |
| C55  | -2.916824480  | 0.909647167  | 0.467232766  |
| C56  | -2.900425386  | 1.172907096  | -1.725316141 |
| C57  | -7.669913477  | 5.099149103  | 3.098507154  |
| C58  | -7.670326169  | 5.276446917  | 4.613275855  |
| C59  | -9.110751056  | 4.946098446  | 2.557632465  |
| C60  | -9.893994126  | 6.213645227  | 2.386971890  |
| C61  | -9.937660436  | 7.360228961  | 3.155891051  |
| C62  | -11.291286049 | 7.546697349  | 1.410867849  |
| C63  | 8.827701996   | 2.883340887  | 3.611903505  |
| C64  | 9.939506312   | 1.863704868  | 3.452746444  |
| C65  | 7.494745384   | 2.119242760  | 3.400186369  |
| C66  | 6.278024115   | 3.001121737  | 3.550579044  |
| C67  | 5.677414623   | 3.217453987  | 4.804067607  |
| C68  | 5.701690604   | 3.622568740  | 2.428762445  |
| C69  | 4.537739350   | 4.020908431  | 4.933747602  |
| C70  | 4.573170564   | 4.435013638  | 2.542867914  |
| C71  | 3.990156137   | 4.630193233  | 3.797378327  |
| C72  | 4.592399061   | 7.970347368  | -1.317825505 |
| C73  | 3.337766946   | 8.774699830  | -1.683010974 |
| C74  | 4.248314360   | 6.477997590  | -1.180272432 |
| C75  | 2.058347161   | 9.848622322  | -3.480589662 |
| C76  | 0.733170666   | 9.087853018  | -3.513007797 |
| C77  | -0.427077322  | 6.924226789  | -3.465695043 |
| C78  | -1.012702003  | 6.767564172  | -2.048775748 |
| C79  | -0.146674691  | 5.569669695  | -4.140817081 |
| C80  | -1.307515347  | 4.571126267  | -4.224631093 |
| C81  | -2.458958183  | 4.908251810  | -5.191372757 |
| C82  | -4.035033649  | 6.808818413  | -4.819429514 |
| C83  | -0.609407824  | 6.451293078  | 0.344737553  |
| C84  | -0.866415570  | 7.778860268  | 1.085231946  |
| C85  | 0.327836539   | 5.585648235  | 1.189754623  |
| C86  | -0.079237265  | 10.060662764 | 1.488052479  |
| C87  | -0.958804079  | 11.264514330 | 1.159615916  |
| C88  | -2.726439445  | 12.211748004 | -0.271048138 |
| C89  | -4.070103376  | 12.415043369 | 0.465325459  |
| C90  | -2.951938614  | 12.117623758 | -1.798155181 |
| C91  | -3.763228522  | 10.883455403 | -2.174127756 |
| C92  | -5.775901525  | 11.382657579 | 1.913121110  |
| C93  | -5.863229335  | 12.422615512 | 3.023017982  |
| C94  | -6.046172339  | 9.967924942  | 2.497772687  |
| C95  | -6.121580315  | 8.892286949  | 1.434631153  |
| C96  | -7.321464535  | 8.657465485  | 0.745921626  |
| C97  | -4.999318108  | 8.123984974  | 1.084519202  |
| C98  | -7.404572351  | 7.696485324  | -0.263960177 |
| C99  | -5.056544809  | 7.173886489  | 0.058106742  |
| C100 | -6.264816445  | 6.967104195  | -0.608319842 |

|       |              |              |              |
|-------|--------------|--------------|--------------|
| C101  | 4.666453693  | -3.312060612 | -8.968388967 |
| C102  | 3.228089290  | -3.311605233 | -8.476320507 |
| C103  | 1.571098521  | -2.043898289 | -7.120065688 |
| C104  | 0.881927484  | -0.781444485 | -7.650505514 |
| C105  | 0.890231387  | 1.664956584  | -7.639651701 |
| C106  | 1.878242058  | 2.806943306  | -7.857907155 |
| C107  | 4.081336602  | 3.786868681  | -7.484452052 |
| C108  | 4.908854874  | 3.826006273  | -8.754093034 |
| C109  | -2.136716350 | -3.880498475 | -9.140244499 |
| C110  | -3.318331599 | -2.945422041 | -8.849897541 |
| C111  | -1.601485345 | -4.474945649 | -7.816365290 |
| C112  | -0.707326171 | -5.701789859 | -8.080980170 |
| C113  | 0.059229089  | -6.092607008 | -6.837165736 |
| C114  | -4.052243105 | -0.694182292 | -8.208510529 |
| C115  | -3.783039834 | 0.642200171  | -8.873948372 |
| C116  | -4.330564796 | -0.610040312 | -6.686476822 |
| C117  | -3.079366478 | -0.561698202 | -5.843459057 |
| C118  | -2.394072828 | 0.643995030  | -5.612835202 |
| C119  | -2.544161702 | -1.746936372 | -5.311883245 |
| C120  | -1.204670358 | 0.654953396  | -4.875238048 |
| C121  | -1.351308265 | -1.735561384 | -4.581054669 |
| C122  | -0.672953448 | -0.532424270 | -4.364312128 |
| C123  | 8.680691362  | -4.971571616 | -4.619382603 |
| C124  | 9.858243435  | -4.883733119 | -3.633357593 |
| C125  | 7.422130560  | -5.554048639 | -3.955197881 |
| C126  | 6.161153949  | -5.494816387 | -4.763413378 |
| C127  | 5.902724606  | -6.097064901 | -5.978647125 |
| C128  | 4.048121682  | -5.149547742 | -5.220347129 |
| C129  | 11.292149064 | -5.947924612 | -1.984155473 |
| C130  | 12.560527675 | -5.449258726 | -2.642128438 |
| C131  | 1.620516136  | -7.054752468 | -0.044986883 |
| C132  | 2.992824623  | -6.486574144 | 0.196628359  |
| C133  | 3.922016242  | -6.531269368 | -1.080544408 |
| C134  | 4.026368230  | -7.998415831 | -1.586986584 |
| C135  | 5.042054413  | -8.152579194 | -2.730016661 |
| C136  | 5.363107637  | -9.582462623 | -3.061737132 |
| C137  | 5.347544733  | -6.113494186 | -0.603928884 |
| C138  | 3.680403614  | -0.102666683 | -2.217159740 |
| Fe139 | 4.041928915  | -1.431485847 | -3.650799910 |
| Fe140 | 2.349520460  | 1.413851278  | -1.918458429 |
| Fe141 | 4.956760331  | 1.232395624  | -1.381536054 |
| Fe142 | 4.052680401  | 1.097472355  | -3.790389111 |
| Fe143 | 3.823160728  | 3.478432005  | -2.649603590 |
| Fe144 | 4.888440291  | -1.365730717 | -1.247133614 |
| Fe145 | 2.292062859  | -1.181493501 | -1.391931811 |
| H146  | -5.007383223 | -8.061021901 | 0.294364223  |
| H147  | -5.343317971 | -7.225046622 | -1.067727596 |
| H148  | -8.922048398 | -6.022371507 | 0.835687071  |
| H149  | -7.686583246 | -7.317754664 | -0.678628805 |
| H150  | -7.402089166 | -8.382273331 | 0.697255833  |
| H151  | -7.582957282 | -3.753061843 | 1.824684675  |
| H152  | -8.356319013 | -6.745833430 | 3.643654831  |
| H153  | -9.235508377 | -4.254519142 | 2.253714659  |
| H154  | -7.839100015 | -7.294690038 | 5.851450701  |
| H155  | -5.730568598 | -6.834319183 | 3.665614571  |
| H156  | -7.771816229 | -5.562319555 | 6.248332726  |
| H157  | -2.439111103 | -2.917008315 | 3.261219648  |
| H158  | -4.636880873 | -4.762738301 | 2.989238721  |
| H159  | -3.435358175 | -7.273338319 | 3.611639834  |
| H160  | -4.874493934 | -0.848295523 | 6.758238815  |
| H161  | -5.526322347 | -3.181166284 | 5.172064797  |
| H162  | -3.340052645 | -7.162557379 | 5.385821275  |

|      |              |              |               |
|------|--------------|--------------|---------------|
| H163 | -4.098177433 | -2.528222667 | 2.746757810   |
| H164 | -4.433451164 | -4.394893211 | 7.434964418   |
| H165 | -6.070621023 | -2.110670204 | 7.152198212   |
| H166 | 0.498193147  | -3.526879987 | 3.882313633   |
| H167 | 0.265274310  | -2.494110313 | 2.453045849   |
| H168 | 1.834155044  | -2.505136175 | 3.284717367   |
| H169 | -0.826932365 | -1.456588708 | 4.415485505   |
| H170 | -3.582063451 | -5.367111470 | 9.338615689   |
| H171 | -2.114688620 | 1.507203412  | 5.106710551   |
| H172 | -1.860299757 | -0.590816678 | 9.065161050   |
| H173 | -2.593517518 | 2.897507624  | 9.215103548   |
| H174 | 0.242262032  | 0.069383985  | 2.741753924   |
| H175 | 1.725335394  | 0.097491356  | 3.698368688   |
| H176 | 8.849790274  | 3.239472766  | 4.660224679   |
| H177 | -3.244627107 | 2.803144653  | 5.539309722   |
| H178 | -3.505453656 | 3.597296731  | 7.853271143   |
| H179 | -1.490839053 | 3.113658580  | 5.564903723   |
| H180 | -1.770773433 | 3.946179241  | 8.036326943   |
| H181 | -2.984303391 | 1.181900288  | 7.440118866   |
| H182 | -0.054832432 | 2.080091808  | 7.355626203   |
| H183 | -1.373659995 | -0.321252841 | 6.369463270   |
| H184 | 0.225929613  | 0.792723502  | 4.361420633   |
| H185 | 0.494962591  | 4.627239873  | 0.667920365   |
| H186 | -0.183248819 | 5.384734464  | 2.144445067   |
| H187 | 1.961708480  | 5.939326224  | 2.220290986   |
| H188 | 2.513271389  | 5.439898695  | 4.764706895   |
| H189 | 4.122407678  | 4.881640676  | 1.655890336   |
| H190 | 6.118764581  | 3.438130929  | 1.435786562   |
| H191 | 6.097014456  | 2.744622665  | 5.696394609   |
| H192 | -0.736713760 | -2.793292592 | 6.550726837   |
| H193 | 0.359458827  | -5.807352240 | 6.936106781   |
| H194 | 0.714771680  | -5.101805786 | 8.530340033   |
| H195 | -1.822249291 | -4.829592725 | 7.010597716   |
| H196 | -3.392107365 | -3.760339404 | 10.084106228  |
| H197 | 4.073397873  | 4.167886884  | 5.913137348   |
| H198 | 1.920520501  | -1.748262844 | 5.712133671   |
| H199 | -1.681916859 | 0.409679536  | 11.664345313  |
| H200 | -1.520562195 | -1.308463015 | 11.216965968  |
| H201 | 1.076534624  | -0.570156170 | 10.722086445  |
| H202 | 12.035691058 | -5.218216307 | 4.258818207   |
| H203 | -0.734704203 | -6.091981754 | -3.944062975  |
| H204 | 2.254818438  | -8.708084527 | 0.719629384   |
| H205 | -1.336740381 | -6.552716191 | -8.379452338  |
| H206 | -0.005860391 | -5.488331597 | -8.901376131  |
| H207 | -2.437767947 | -4.777076645 | -7.167304648  |
| H208 | -3.259559326 | 0.567271686  | -9.857020115  |
| H209 | -2.596519350 | -4.702608076 | -9.709699830  |
| H210 | -3.001287137 | -2.575905224 | -2.338169743  |
| H211 | -3.106461506 | -5.336085625 | -1.011095514  |
| H212 | -2.034332597 | -1.361527248 | -8.482029328  |
| H213 | -4.977178994 | -1.061766067 | -8.693831252  |
| H214 | -0.570919572 | -2.568456334 | -9.505841839  |
| H215 | -0.342460411 | -5.755821416 | -2.259780477  |
| H216 | -1.047141412 | -3.692885717 | -7.275304988  |
| H217 | -0.508970478 | -3.957449294 | -10.388000805 |
| H218 | -6.155751089 | -4.360742932 | -2.798581080  |
| H219 | -3.057257883 | -2.698948728 | -0.579195160  |
| H220 | 1.611184423  | -5.106208213 | -7.551901452  |
| H221 | -1.602181755 | -4.407639699 | -0.971397301  |
| H222 | -4.132818823 | 2.200432217  | 2.973248219   |
| H223 | -2.671546795 | 0.458814236  | 1.422750310   |
| H224 | -8.052055878 | -0.366560981 | 3.723262034   |



|      |               |              |              |
|------|---------------|--------------|--------------|
| H225 | -7.070648101  | -1.029786452 | 0.978115760  |
| H226 | -7.424770200  | 3.142854913  | 2.259215132  |
| H227 | -9.415832163  | 7.653488185  | 4.059946543  |
| H228 | -7.707677967  | 4.313626142  | 5.177634135  |
| H229 | -9.658235469  | 4.223226241  | 3.188587015  |
| H230 | -7.186608098  | 5.977961083  | 2.641503174  |
| H231 | -12.011271089 | 7.989381966  | 0.727026988  |
| H232 | -3.807913973  | 3.871409578  | 1.158068880  |
| H233 | -5.296322025  | 3.354065112  | 0.363642468  |
| H234 | -11.088313050 | 9.132828753  | 2.815014902  |
| H235 | -9.037907894  | 4.486503415  | 1.559358189  |
| H236 | -6.230530569  | 1.131842014  | 1.257403277  |
| H237 | -6.695002994  | -1.444138463 | 3.397578175  |
| H238 | -10.223118065 | 0.045405830  | -0.243848244 |
| H239 | -2.649716193  | 0.996710370  | -2.767401966 |
| H240 | -10.005901277 | -1.707224781 | -0.075213045 |
| H241 | 9.740253129   | 4.572359398  | 2.894544127  |
| H242 | 8.140194930   | 4.498969127  | 2.561632780  |
| H243 | 0.867547156   | 6.499915503  | -1.218886862 |
| H244 | -1.584633509  | 5.946240339  | 0.298014112  |
| H245 | 0.560495270   | 8.743114319  | -0.036034814 |
| H246 | -4.480025114  | 3.327646329  | -2.141729311 |
| H247 | -6.154407176  | 2.672248628  | -3.187142752 |
| H248 | -5.474076715  | 4.575815288  | -2.067259191 |
| H249 | -5.457704680  | 0.575726582  | -3.930222412 |
| H250 | -7.184903620  | 0.138963424  | -4.069686940 |
| H251 | -1.969992503  | 12.124621688 | -2.293247265 |
| H252 | -3.512822680  | 13.008479166 | -2.108158213 |
| H253 | -2.045120848  | 9.830099705  | -2.789415184 |
| H254 | -3.527340609  | 8.916214271  | -2.692074831 |
| H255 | -3.925468598  | 8.466764327  | -6.011019975 |
| H256 | -2.853338778  | 3.980904775  | -5.632595733 |
| H257 | -8.353209583  | 7.523665165  | -0.777479069 |
| H258 | -4.055389862  | 8.244720750  | 1.624088294  |
| H259 | -5.333449270  | 6.866921522  | -3.220181878 |
| H260 | 0.684240968   | 5.076550195  | -3.610661027 |
| H261 | 1.696144796   | 7.256381541  | -3.368525643 |
| H262 | -1.717489366  | 4.355679859  | -3.225697703 |
| H263 | -8.136393234  | -1.627961124 | -1.437451366 |
| H264 | 2.269631977   | 10.199132033 | -4.500068424 |
| H265 | -5.900500427  | -1.773946998 | -3.061581310 |
| H266 | 0.221762872   | 5.782812018  | -5.158100170 |
| H267 | -4.163139728  | 6.620921490  | -0.235430322 |
| H268 | 1.886723997   | 10.732102148 | -2.850666754 |
| H269 | -3.116706956  | 7.081897592  | -6.641932036 |
| H270 | -5.549754244  | 8.111119179  | -4.395146132 |
| H271 | -4.592314143  | -4.258218569 | -3.372687613 |
| H272 | -5.156988586  | -4.053576049 | -0.747644003 |
| H273 | -8.216505313  | 9.227319256  | 1.004320821  |
| H274 | -5.580089157  | 0.665388059  | -1.506999571 |
| H275 | -1.192808753  | 7.478173523  | -4.026227428 |
| H276 | -2.084209869  | 5.512845909  | -6.027518482 |
| H277 | -0.862295085  | 3.628963412  | -4.572962273 |
| H278 | -4.094621850  | 5.036535947  | -3.817648067 |
| H279 | -0.313516382  | 9.777919355  | 2.525812592  |
| H280 | -1.923998028  | 10.214378069 | -0.316571460 |
| H281 | -2.148144507  | 13.124594688 | -0.066391932 |
| H282 | 0.961461514   | 10.411270072 | 1.463137537  |
| H283 | -3.874679679  | 10.579382718 | 1.330304783  |
| H284 | 4.994920572   | -2.278352874 | -9.151457461 |
| H285 | 5.274652769   | -3.692874823 | -8.121939599 |
| H286 | 8.477604014   | -3.931649887 | -4.913907325 |

|      |              |               |               |
|------|--------------|---------------|---------------|
| H287 | 5.779329285  | -4.297120698  | -10.364427890 |
| H288 | 4.330871470  | -4.999307203  | -10.055824716 |
| H289 | 5.170196754  | 5.943665308   | -0.919061378  |
| H290 | 4.471056131  | 8.494759338   | 0.644452218   |
| H291 | 3.884379018  | 8.748713142   | -3.661407372  |
| H292 | 3.521709914  | 6.343447942   | -0.365432413  |
| H293 | 5.531735809  | 9.404497014   | -0.198408525  |
| H294 | 4.761576877  | 3.742582322   | -6.619517897  |
| H295 | 5.334439666  | 8.081913916   | -2.124117919  |
| H296 | 6.155708385  | -5.801339556  | 4.995529067   |
| H297 | 8.117028255  | -6.548991099  | 2.763346271   |
| H298 | 3.445120115  | 1.849232751   | -6.877935013  |
| H299 | 4.714948969  | 0.947186943   | 3.444690797   |
| H300 | 0.360333702  | 1.508350570   | -8.587819497  |
| H301 | -0.946217284 | -2.665510512  | -4.176184617  |
| H302 | 0.141959855  | 2.039410510   | -6.921067824  |
| H303 | 4.756846975  | -3.596234596  | 4.382626610   |
| H304 | 2.132000685  | 0.313953917   | -6.464763006  |
| H305 | 4.707384163  | -4.082229425  | 2.686963448   |
| H306 | 5.769186686  | -6.191442983  | 3.305672565   |
| H307 | 7.196888615  | -4.158787020  | 2.605397044   |
| H308 | 7.287835097  | -3.709521598  | 4.320317766   |
| H309 | -4.926070452 | -1.491894501  | -6.410328985  |
| H310 | 7.170877914  | -8.099036471  | 5.148834724   |
| H311 | 6.603260916  | -10.693868217 | 3.650057949   |
| H312 | 0.252336593  | -0.515148721  | -3.784385995  |
| H313 | 7.945260598  | -10.260185097 | 6.208214467   |
| H314 | 6.458688059  | -10.877800791 | 5.902315631   |
| H315 | 5.743108079  | -2.027985270  | 2.031084941   |
| H316 | -0.674617480 | 1.590539995   | -4.689323075  |
| H317 | -3.070758755 | -2.692487758  | -5.459095894  |
| H318 | 9.002063370  | -8.573650999  | -1.294677480  |
| H319 | 7.618152897  | -6.610646035  | -3.698783012  |
| H320 | 7.624328656  | -7.098822081  | 0.109318340   |
| H321 | 8.375967060  | -9.424320301  | -2.423378563  |
| H322 | 4.681893135  | 3.020548993   | -9.494607541  |
| H323 | 7.050014568  | -4.051739219  | -0.242718381  |
| H324 | 3.499468434  | -7.009046101  | 1.021518052   |
| H325 | 3.587393034  | -1.555110848  | -7.478850751  |
| H326 | 4.332280784  | -8.634420872  | -0.741207978  |
| H327 | 4.048502425  | -6.206102127  | -7.049838187  |
| H328 | 3.009578101  | -4.847040827  | -5.163276474  |
| H329 | 8.299137507  | -11.033510108 | 4.021136759   |
| H330 | 5.209374641  | 0.122196108   | 1.962570301   |
| H331 | 9.155212463  | -4.425200914  | 0.830585175   |
| H332 | 7.539486568  | -2.579192026  | -0.118251774  |
| H333 | 9.883055248  | -5.281323330  | 2.940825352   |
| H334 | 4.816316875  | -1.910365637  | 5.501391125   |
| H335 | 4.569996302  | -11.214782756 | -3.597668176  |
| H336 | 4.645146942  | -7.661195211  | -3.630895357  |
| H337 | 5.991625487  | -7.670468657  | -2.472630053  |
| H338 | 3.035359338  | -8.327312796  | -1.931635808  |
| H339 | 1.712960753  | -1.984332307  | -6.028851913  |
| H340 | -2.802554456 | 1.574466974   | -6.016083370  |
| H341 | -4.954690645 | 0.280582419   | -6.519839525  |
| H342 | 2.876756897  | -5.428087896  | 0.462361978   |
| H343 | 9.443168782  | -5.948846421  | 0.739219681   |
| H344 | 8.574791645  | -7.993424685  | 0.948141655   |
| H345 | 4.249024809  | -0.294584293  | 5.373922711   |
| H346 | 6.544356665  | -6.659197019  | -6.645884925  |
| H347 | 7.249969808  | -5.036191845  | -3.004400745  |
| H348 | 0.938208406  | -2.900928178  | -7.358470402  |

|       |               |               |              |
|-------|---------------|---------------|--------------|
| H349  | 3.521536229   | 4.732910028   | -7.416579226 |
| H350  | 7.463666868   | 1.299971922   | 4.133753597  |
| H351  | 7.501465992   | 1.667263998   | 2.395582911  |
| H352  | 9.845499336   | -5.252665718  | -6.285522566 |
| H353  | 9.371869647   | -6.654174632  | -5.587848447 |
| H354  | 11.487007824  | -6.976049918  | -1.639902388 |
| H355  | 9.615710385   | -6.850628649  | -2.936342294 |
| H356  | 12.620163470  | -5.632516618  | -3.742228786 |
| H357  | 11.067753875  | -5.334759792  | -1.096632267 |
| H358  | 10.239892879  | 1.680375724   | 2.392388012  |
| H359  | -4.881827409  | 12.768215268  | 3.425873394  |
| H360  | 11.025944332  | -5.046557705  | 5.717107577  |
| H361  | 10.203980096  | -2.753087663  | 4.414163110  |
| H362  | -6.555125325  | 11.622469742  | 1.171963656  |
| H363  | -5.252149424  | 9.727743257   | 3.222327071  |
| H364  | -6.992966865  | 10.021119907  | 3.054649465  |
| H365  | -7.213830539  | 5.911494575   | -1.943750057 |
| H366  | -0.022485289  | -1.291240841  | 0.263846022  |
| H367  | 2.572166085   | -2.814864139  | -0.029895910 |
| H368  | -1.728311550  | -0.345999777  | -0.838636105 |
| Mo369 | 4.376480653   | -3.815012821  | -2.333868131 |
| N370  | 2.360375942   | 0.111153476   | 1.218259873  |
| N371  | 2.322371936   | -0.340899095  | 0.181327058  |
| N372  | -5.703416091  | -7.955416925  | -0.448579467 |
| N373  | -8.102503198  | -5.757260354  | 1.376346378  |
| N374  | -7.903213440  | -6.024763192  | 4.199915413  |
| N375  | -5.224307265  | -6.765892508  | 4.548761340  |
| N376  | -3.886199375  | -4.418652294  | 3.589963636  |
| N377  | -4.799687705  | -2.584818399  | 5.575621960  |
| N378  | -3.919317828  | -3.766249365  | 8.057663563  |
| N379  | -1.182690415  | -4.676067073  | 7.796989616  |
| N380  | 0.273790581   | -2.734958149  | 6.441834535  |
| N381  | -0.590521807  | 0.131732167   | 6.844528305  |
| N382  | -1.226311231  | -0.016719537  | 9.624729118  |
| N383  | 7.118029885   | -10.152666420 | 5.617119108  |
| N384  | 7.567421836   | -7.908679357  | 4.222087495  |
| N385  | 5.450540296   | -2.167264042  | 3.002281500  |
| N386  | 4.517908765   | -1.150700460  | 4.898584497  |
| N387  | 4.934311764   | 0.079042290   | 2.966416985  |
| N388  | 9.940420340   | -5.340277381  | 3.980641295  |
| N389  | -5.342346469  | -3.746410029  | -2.875276370 |
| N390  | -1.001897045  | -5.699483071  | -3.037326224 |
| N391  | -5.971834293  | -1.274464356  | -2.161706579 |
| N392  | -8.425548017  | -0.747629454  | -1.018180514 |
| N393  | -7.724860824  | -0.719140178  | 1.710469474  |
| N394  | -5.894880802  | 1.393879551   | 2.183867048  |
| N395  | -3.669395782  | 2.151927471   | -1.250202836 |
| N396  | -2.441482876  | 0.395515077   | -0.720161537 |
| N397  | -6.939589628  | 3.885220144   | 2.757660187  |
| N398  | -10.744739491 | 6.342636055   | 1.301410359  |
| N399  | -10.829768678 | 8.196368972   | 2.516851179  |
| N400  | 8.993363528   | 3.935025611   | 2.607949541  |
| N401  | 5.206137561   | 8.441898541   | -0.068684527 |
| N402  | 3.208135734   | 9.113122735   | -2.995154323 |
| N403  | 0.787465129   | 7.737027823   | -3.486104136 |
| N404  | -3.594486388  | 5.584258080   | -4.554151399 |
| N405  | -3.546223726  | 7.539878191   | -5.845557975 |
| N406  | -4.940537174  | 7.398388354   | -4.001609621 |
| N407  | -0.129245732  | 6.609893336   | -1.024050826 |
| N408  | -0.196238367  | 8.882176499   | 0.640401957  |
| N409  | -1.931525147  | 11.086497564  | 0.215422076  |
| N410  | -3.029090419  | 9.785087189   | -2.499611141 |

|      |              |               |               |
|------|--------------|---------------|---------------|
| N411 | -4.467258071 | 11.404291256  | 1.275603257   |
| N412 | 4.790289503  | -4.095558243  | -10.201350947 |
| N413 | 2.865940470  | -2.230982945  | -7.761720705  |
| N414 | 1.410976812  | 0.379908845   | -7.208786278  |
| N415 | 3.158374503  | 2.666544778   | -7.427374531  |
| N416 | -1.145785474 | -3.248030213  | -10.019427291 |
| N417 | -3.014952358 | -1.644646286  | -8.579829989  |
| N418 | 9.047698224  | -5.715109660  | -5.839983318  |
| N419 | 4.983677593  | -4.899656692  | -4.309443021  |
| N420 | 4.569019566  | -5.868154165  | -6.244682344  |
| N421 | 10.179408783 | -5.999711493  | -2.919112933  |
| N422 | -0.196877811 | 2.387024341   | -0.871394754  |
| N423 | 0.751573114  | 1.923089673   | -1.284680208  |
| O424 | -5.856108730 | -6.003878666  | 1.658832101   |
| O425 | -7.187605463 | -3.864215222  | 4.297517293   |
| O426 | -5.338621610 | -6.093657079  | 6.732787078   |
| O427 | -2.243234682 | -4.918360803  | 5.080928258   |
| O428 | -2.859443679 | -1.442510038  | 5.260103537   |
| O429 | -3.578087500 | -1.624261634  | 8.768798065   |
| O430 | -0.963023526 | -4.353647446  | 10.058961186  |
| O431 | 2.244196268  | -3.874365913  | 6.763672577   |
| O432 | 1.670824049  | 0.249712884   | 7.135123438   |
| O433 | -0.007848838 | 1.887368737   | 9.839379752   |
| O434 | 0.657623071  | -0.115988812  | 12.668354705  |
| O435 | 8.417056960  | -9.041978684  | 2.392866599   |
| O436 | 8.935486547  | -6.065896589  | 5.917022034   |
| O437 | 12.223856707 | -2.651725090  | 4.683480887   |
| O438 | -5.484161191 | -1.608885189  | 0.056459301   |
| O439 | -2.987391251 | -4.995229504  | -3.889191522  |
| O440 | -7.863241384 | 1.434653687   | -0.671102385  |
| O441 | -6.860926094 | 2.072132621   | -3.546431711  |
| O442 | -9.893690053 | -0.207294140  | 2.272394772   |
| O443 | -5.804035027 | 0.864361293   | 4.404249499   |
| O444 | -4.942201856 | 4.565748562   | 3.630521620   |
| O445 | -7.667685296 | 6.353416766   | 5.186450286   |
| O446 | 10.458969598 | 1.259774585   | 4.380417107   |
| O447 | 2.863413600  | 5.427187227   | 3.855132504   |
| O448 | 2.486364619  | 9.101742735   | -0.834977690  |
| O449 | -0.328892755 | 9.738521787   | -3.595502889  |
| O450 | -2.241127701 | 6.788124012   | -1.875235825  |
| O451 | -1.634520809 | 7.798028252   | 2.056804965   |
| O452 | 1.557359910  | 6.287585226   | 1.399315332   |
| O453 | -0.791212578 | 12.331813164  | 1.763789860   |
| O454 | -4.723596389 | 13.456503777  | 0.310194071   |
| O455 | -5.001366962 | 10.869635515  | -2.094405350  |
| O456 | -6.921375847 | 12.826528703  | 3.476356934   |
| O457 | -6.288103667 | 6.033208990   | -1.654858769  |
| O458 | 2.472454217  | -4.291430798  | -8.707221045  |
| O459 | -0.073230714 | -0.844957072  | -8.454928599  |
| O460 | 1.459603937  | 3.845236156   | -8.397393990  |
| O461 | 5.766187034  | 4.667906113   | -8.967218314  |
| O462 | -4.486567929 | -3.370119049  | -8.848713984  |
| O463 | -0.423080266 | -6.750409837  | -5.919927326  |
| O464 | 1.324264282  | -5.635267052  | -6.741910366  |
| O465 | -4.131744841 | 1.724600688   | -8.425937940  |
| O466 | 10.551951237 | -3.854430511  | -3.538589837  |
| O467 | 13.493723753 | -4.953411213  | -2.026482471  |
| O468 | 0.679453846  | -6.459050875  | -0.545590461  |
| O469 | 1.430829943  | -8.364276110  | 0.324845095   |
| O470 | 6.483109234  | -10.089295229 | -3.042040106  |
| O471 | 4.263730086  | -10.302935803 | -3.404878991  |
| O472 | 5.842173364  | -5.067060648  | -1.182867927  |

|                    |                                  |              |              |               |              |
|--------------------|----------------------------------|--------------|--------------|---------------|--------------|
|                    | O473                             | 5.954464184  | -6.807700062 | 0.244917405   |              |
|                    | O474                             | 3.450916939  | -5.683653615 | -2.061091205  |              |
|                    | O475                             | 9.802511441  | -5.110031727 | 1.134584786   |              |
|                    | O476                             | 7.645752651  | -3.463535154 | 0.287529941   |              |
|                    | O477                             | -5.060123164 | 3.957884675  | -2.704617536  |              |
|                    | O478                             | 9.242246886  | -9.102004747 | -2.097937792  |              |
|                    | O479                             | 8.575059554  | -7.414538712 | 0.143130737   |              |
|                    | S480                             | 3.544949972  | 5.752007851  | -2.734091385  |              |
|                    | S481                             | 2.276051205  | 2.449806182  | -3.885027086  |              |
|                    | S482                             | 2.355234970  | -2.831826345 | -3.183534180  |              |
|                    | S483                             | 3.505654586  | 2.764413028  | -0.526337604  |              |
|                    | S484                             | 0.108438534  | -1.800030828 | -0.993024100  |              |
|                    | S485                             | 4.215817780  | -0.247099501 | -5.548208833  |              |
|                    | S486                             | 3.942390736  | -3.047865326 | -0.020221642  |              |
|                    | S487                             | 5.764842536  | 2.391208728  | -3.214576138  |              |
|                    | S488                             | 6.034643135  | -2.245595308 | -2.960306806  |              |
|                    | S489                             | 6.209499629  | -0.051229079 | -0.039181967  |              |
| <b>20, 47(3/2)</b> | <b>bm2unh2b2n2x6n2n3b2.car_4</b> |              |              |               |              |
| Fe1                | 2.73                             | C1           | -7.177769453 | -6.051855740  | 1.092957729  |
| Fe2                | -1.01                            | C2           | -7.269739477 | -7.254381533  | 0.148916576  |
| Fe3                | 2.85                             | C3           | -8.390929800 | -4.218184611  | 2.186302585  |
| Fe4                | -2.06                            | C4           | -7.935729812 | -4.419902262  | 3.630089246  |
| Fe5                | 2.58                             | C5           | -7.738933092 | -5.928526873  | 5.539533028  |
| Fe6                | 0.19                             | C6           | -6.215100490 | -6.021395091  | 5.678056866  |
| Fe7                | -1.86                            | C7           | -4.087102551 | -6.469073906  | 4.553700941  |
|                    |                                  | C8           | -3.483134320 | -5.065309477  | 4.445278835  |
|                    |                                  | C9           | -3.663468998 | -2.818438734  | 3.515384569  |
|                    |                                  | C10          | -3.839439180 | -2.030493558  | 4.823458428  |
|                    |                                  | C11          | -5.177269272 | -1.610220116  | 6.804908619  |
|                    |                                  | C12          | -4.280344402 | -2.117371045  | 7.943512360  |
|                    |                                  | C13          | -3.491290354 | -4.057336959  | 9.209038003  |
|                    |                                  | C14          | -1.969354153 | -4.222538365  | 9.099035988  |
|                    |                                  | C15          | -0.070381194 | -4.800359310  | 7.644480284  |
|                    |                                  | C16          | 0.772116749  | -3.718657227  | 6.960809199  |
|                    |                                  | C17          | 0.710471916  | -1.512328977  | 5.815752163  |
|                    |                                  | C18          | 0.594947707  | -0.236764282  | 6.670604287  |
|                    |                                  | C19          | 0.164229130  | -1.343616166  | 4.379973268  |
|                    |                                  | C20          | 0.593874358  | -0.001492492  | 3.784794234  |
|                    |                                  | C21          | 0.599341866  | -2.526096194  | 3.507546305  |
|                    |                                  | C22          | -0.867890998 | 1.512155712   | 7.586511564  |
|                    |                                  | C23          | -0.719477186 | 1.291860119   | 9.103247085  |
|                    |                                  | C24          | -2.213067455 | 2.171376725   | 7.195160723  |
|                    |                                  | C25          | -2.491590973 | 3.411923472   | 8.052886178  |
|                    |                                  | C26          | -2.218899274 | 2.543707192   | 5.706617885  |
|                    |                                  | C27          | -1.260573849 | -0.065131352  | 11.038872299 |
|                    |                                  | C28          | 0.171480706  | -0.131188833  | 11.531531041 |
|                    |                                  | C29          | 7.006879110  | -10.548800100 | 4.510965846  |
|                    |                                  | C30          | 7.451355651  | -9.272284597  | 3.798955835  |
|                    |                                  | C31          | 7.496884272  | -6.786728680  | 4.049298720  |
|                    |                                  | C32          | 8.641649504  | -6.230324163  | 4.917458287  |
|                    |                                  | C33          | 6.232791281  | -5.916169110  | 4.145192613  |
|                    |                                  | C34          | 6.462914577  | -4.461341635  | 3.731810034  |
|                    |                                  | C35          | 5.135975646  | -3.724064343  | 3.552722138  |
|                    |                                  | C36          | 4.904434973  | -1.230533815  | 3.700901931  |
|                    |                                  | C37          | 10.846512384 | -5.167149469  | 4.902678898  |
|                    |                                  | C38          | 10.965619983 | -3.660756606  | 4.813285239  |
|                    |                                  | C39          | -4.945137857 | -3.210334592  | -1.546328382 |
|                    |                                  | C40          | -5.509110764 | -1.819028336  | -1.207704963 |
|                    |                                  | C41          | -3.406594639 | -3.139674297  | -1.484543912 |
|                    |                                  | C42          | -2.666696455 | -4.492585521  | -1.482783206 |
|                    |                                  | C43          | -2.330772761 | -5.058197625  | -2.860984935 |

|      |               |              |              |
|------|---------------|--------------|--------------|
| C44  | -6.397352136  | 0.238375783  | -2.216254414 |
| C45  | -7.721596014  | 0.518708129  | -1.498273786 |
| C46  | -6.389895451  | 0.903803889  | -3.608418480 |
| C47  | -9.516800331  | -0.376749381 | -0.102898832 |
| C48  | -9.082302428  | -0.129383777 | 1.349080647  |
| C49  | -7.249167815  | -0.180219745 | 2.987526427  |
| C50  | -6.234188398  | 0.940199340  | 3.204024661  |
| C51  | -4.865199033  | 2.729701415  | 2.219138499  |
| C52  | -5.462045022  | 4.025289169  | 2.821336019  |
| C53  | -4.289794248  | 3.133470265  | 0.852999137  |
| C54  | -3.548258730  | 2.090043289  | 0.075640031  |
| C55  | -2.824250956  | 0.969109214  | 0.406009601  |
| C56  | -2.684294670  | 1.219320330  | -1.789006231 |
| C57  | -7.482970504  | 5.448091184  | 2.896764684  |
| C58  | -7.502506064  | 5.664097768  | 4.407665259  |
| C59  | -8.919191158  | 5.338664961  | 2.335854133  |
| C60  | -9.645196003  | 6.634252344  | 2.118162224  |
| C61  | -9.678531206  | 7.787023840  | 2.878529219  |
| C62  | -10.958413212 | 8.006801489  | 1.082966574  |
| C63  | 8.886813672   | 2.571010368  | 3.718034505  |
| C64  | 9.960675777   | 1.507993135  | 3.581462549  |
| C65  | 7.526932383   | 1.860955050  | 3.500191819  |
| C66  | 6.344979642   | 2.794503451  | 3.615101025  |
| C67  | 5.736964639   | 3.057707317  | 4.856632651  |
| C68  | 5.809881865   | 3.419458729  | 2.473698373  |
| C69  | 4.628469680   | 3.907006550  | 4.957570529  |
| C70  | 4.712189583   | 4.275421099  | 2.559537016  |
| C71  | 4.119688716   | 4.514625149  | 3.802758062  |
| C72  | 4.936602946   | 7.743245699  | -1.378726270 |
| C73  | 3.719586159   | 8.587655212  | -1.775472655 |
| C74  | 4.521311961   | 6.274571605  | -1.184814398 |
| C75  | 2.517270661   | 9.693254179  | -3.607843301 |
| C76  | 1.161789461   | 8.989304522  | -3.653891260 |
| C77  | -0.089071494  | 6.875117811  | -3.583434238 |
| C78  | -0.694797611  | 6.743772990  | -2.172623822 |
| C79  | 0.142784883   | 5.505264170  | -4.245289204 |
| C80  | -1.063420912  | 4.563863302  | -4.345797209 |
| C81  | -2.173746786  | 4.950217156  | -5.342568698 |
| C82  | -3.679899487  | 6.924707364  | -5.033020846 |
| C83  | -0.327518612  | 6.459852770  | 0.230040596  |
| C84  | -0.550891768  | 7.811310694  | 0.938326283  |
| C85  | 0.567844777   | 5.580056439  | 1.105294088  |
| C86  | 0.322528449   | 10.063638556 | 1.329140285  |
| C87  | -0.510652279  | 11.292260206 | 0.972628819  |
| C88  | -2.202732979  | 12.298401966 | -0.504759990 |
| C89  | -3.537192082  | 12.567344581 | 0.223720570  |
| C90  | -2.429486274  | 12.197284483 | -2.031257652 |
| C91  | -3.267225933  | 10.979363895 | -2.398734920 |
| C92  | -5.293819138  | 11.630130085 | 1.670522849  |
| C93  | -5.351985925  | 12.706192478 | 2.749730518  |
| C94  | -5.630026096  | 10.243605682 | 2.285611706  |
| C95  | -5.755948926  | 9.158044775  | 1.238972585  |
| C96  | -6.965316497  | 8.975610287  | 0.549010909  |
| C97  | -4.668807968  | 8.336313454  | 0.898084560  |
| C98  | -7.086599972  | 8.018049471  | -0.460352725 |
| C99  | -4.764168108  | 7.388695848  | -0.126510797 |
| C100 | -5.975903366  | 7.245363223  | -0.799695907 |
| C101 | 4.663757484   | -3.645597699 | -8.844357107 |
| C102 | 3.222468814   | -3.583464593 | -8.366601736 |
| C103 | 1.594280494   | -2.226179131 | -7.061909876 |
| C104 | 0.957330438   | -0.947558106 | -7.618734552 |
| C105 | 1.065290393   | 1.495010134  | -7.664292298 |

|       |              |              |              |
|-------|--------------|--------------|--------------|
| C106  | 2.093820777  | 2.605830006  | -7.852310033 |
| C107  | 4.330127188  | 3.502780990  | -7.454076583 |
| C108  | 5.180777696  | 3.508239195  | -8.708201036 |
| C109  | -2.157180378 | -3.951748869 | -9.091739783 |
| C110  | -3.300862801 | -2.963850993 | -8.826618779 |
| C111  | -1.657454552 | -4.541353842 | -7.752233280 |
| C112  | -0.803831277 | -5.802755694 | -7.984813815 |
| C113  | -0.075210575 | -6.203206260 | -6.721672661 |
| C114  | -3.950314300 | -0.677456526 | -8.235228454 |
| C115  | -3.623052064 | 0.635848484  | -8.920174009 |
| C116  | -4.249894341 | -0.556171100 | -6.718948341 |
| C117  | -3.011923441 | -0.531804952 | -5.854497201 |
| C118  | -2.291433617 | 0.655594234  | -5.629888594 |
| C119  | -2.517204755 | -1.724588268 | -5.298669850 |
| C120  | -1.107259224 | 0.639650245  | -4.882701243 |
| C121  | -1.331007387 | -1.740100192 | -4.556774364 |
| C122  | -0.615204981 | -0.556293385 | -4.350494480 |
| C123  | 8.555808590  | -5.395159748 | -4.399593048 |
| C124  | 9.714011878  | -5.333777675 | -3.386235676 |
| C125  | 7.267223847  | -5.932906171 | -3.754817022 |
| C126  | 6.022807326  | -5.843800161 | -4.586591645 |
| C127  | 5.765491402  | -6.452452501 | -5.798892483 |
| C128  | 3.933079002  | -5.426885896 | -5.089755994 |
| C129  | 11.091644894 | -6.444729146 | -1.715223977 |
| C130  | 12.388365925 | -5.996961785 | -2.353344735 |
| C131  | 1.336472247  | -7.102781187 | 0.092222735  |
| C132  | 2.727891527  | -6.585334996 | 0.336032949  |
| C133  | 3.671915506  | -6.712039714 | -0.925380347 |
| C134  | 3.718129185  | -8.192817818 | -1.395468180 |
| C135  | 4.733210405  | -8.409008494 | -2.529640720 |
| C136  | 5.015655372  | -9.853821424 | -2.830654542 |
| C137  | 5.101384864  | -6.334784306 | -0.430748681 |
| C138  | 3.721961184  | -0.308001736 | -2.149204109 |
| Fe139 | 4.040371589  | -1.664923145 | -3.589527844 |
| Fe140 | 2.439517257  | 1.259957223  | -1.905304637 |
| Fe141 | 5.037104010  | 0.992277786  | -1.323765343 |
| Fe142 | 4.155930249  | 0.856972898  | -3.735687268 |
| Fe143 | 3.999003052  | 3.259953966  | -2.621579259 |
| Fe144 | 4.869449664  | -1.593212098 | -1.178241238 |
| Fe145 | 2.299043366  | -1.323664652 | -1.265675611 |
| H146  | -5.332825001 | -7.861802160 | 0.349851504  |
| H147  | -5.612958891 | -7.028242611 | -1.026630201 |
| H148  | -9.187580421 | -5.680495414 | 0.844917068  |
| H149  | -7.966758017 | -7.021395141 | -0.671599183 |
| H150  | -7.744696176 | -8.066347826 | 0.727291501  |
| H151  | -7.742827706 | -3.435888866 | 1.765874675  |
| H152  | -8.665369818 | -6.339802043 | 3.639685125  |
| H153  | -9.422978463 | -3.843004620 | 2.198425458  |
| H154  | -8.183021663 | -6.882664794 | 5.852855958  |
| H155  | -6.042399271 | -6.576571337 | 3.709213314  |
| H156  | -8.073864254 | -5.149063731 | 6.235928925  |
| H157  | -2.595520699 | -2.775760429 | 3.263298439  |
| H158  | -4.877461110 | -4.526159721 | 3.016506802  |
| H159  | -3.758367032 | -7.075420430 | 3.698460652  |
| H160  | -4.982292032 | -0.536605795 | 6.692335617  |
| H161  | -5.690531411 | -2.896226832 | 5.155343693  |
| H162  | -3.688824007 | -6.920712960 | 5.470415098  |
| H163  | -4.227779245 | -2.328983909 | 2.708646411  |
| H164  | -4.711631298 | -4.083082555 | 7.455299834  |
| H165  | -6.228418117 | -1.748993434 | 7.095029951  |
| H166  | 0.309382196  | -3.484659930 | 3.962866732  |
| H167  | 0.125323172  | -2.471792010 | 2.515391304  |

|      |              |              |               |
|------|--------------|--------------|---------------|
| H168 | 1.689727360  | -2.527460043 | 3.353096868   |
| H169 | -0.934976012 | -1.352125805 | 4.444011571   |
| H170 | -3.922624078 | -5.054156677 | 9.382997807   |
| H171 | -2.092349669 | 1.668114087  | 5.054466317   |
| H172 | -1.979016810 | -0.363628775 | 9.053976519   |
| H173 | -2.574254490 | 3.172060977  | 9.122369682   |
| H174 | 0.208335669  | 0.103277678  | 2.761201894   |
| H175 | 1.687443564  | 0.079068246  | 3.723513926   |
| H176 | 8.913282935  | 2.940870943  | 4.761253492   |
| H177 | -3.172378653 | 3.021826906  | 5.438508249   |
| H178 | -3.434902520 | 3.879212023  | 7.733286467   |
| H179 | -1.406881273 | 3.256448405  | 5.487489650   |
| H180 | -1.686535986 | 4.154237710  | 7.933429968   |
| H181 | -3.017212905 | 1.435961277  | 7.378411082   |
| H182 | -0.048507301 | 2.200805006  | 7.327769263   |
| H183 | -1.454752215 | -0.161856711 | 6.367551116   |
| H184 | 0.217175474  | 0.848753316  | 4.371715900   |
| H185 | 0.720787376  | 4.611343305  | 0.597490906   |
| H186 | 0.029787387  | 5.403160053  | 2.049629242   |
| H187 | 2.184997853  | 5.899475343  | 2.172239895   |
| H188 | 2.675462917  | 5.418220139  | 4.736486388   |
| H189 | 4.292976991  | 4.728429713  | 1.660273590   |
| H190 | 6.237086320  | 3.208103261  | 1.490423823   |
| H191 | 6.124982322  | 2.583971793  | 5.762870436   |
| H192 | -0.923372781 | -2.644699187 | 6.617934259   |
| H193 | 0.018911084  | -5.712441324 | 7.036583440   |
| H194 | 0.390086020  | -4.995475651 | 8.622138873   |
| H195 | -2.111878475 | -4.631093303 | 7.066001017   |
| H196 | -3.670571096 | -3.444078782 | 10.101144096  |
| H197 | 4.157145597  | 4.085495291  | 5.927804318   |
| H198 | 1.784331385  | -1.737006178 | 5.779123941   |
| H199 | -1.809144757 | 0.675842776  | 11.644196102  |
| H200 | -1.712128125 | -1.053781792 | 11.220808353  |
| H201 | 0.919558489  | -0.446139674 | 10.766455894  |
| H202 | 11.773797963 | -5.628707377 | 4.530332259   |
| H203 | -0.897624187 | -6.130152821 | -3.857437706  |
| H204 | 1.891920004  | -8.759865247 | 0.907331189   |
| H205 | -1.457951625 | -6.635026734 | -8.283201090  |
| H206 | -0.082233777 | -5.625745278 | -8.796053061  |
| H207 | -2.509674366 | -4.800946040 | -7.105278050  |
| H208 | -3.096111149 | 0.521671625  | -9.896724824  |
| H209 | -2.645569784 | -4.765389997 | -9.650559761  |
| H210 | -3.047742721 | -2.519125281 | -2.319967718  |
| H211 | -3.268058966 | -5.255520986 | -0.956674973  |
| H212 | -1.955855640 | -1.424111545 | -8.482067446  |
| H213 | -4.883410845 | -1.019290250 | -8.726647162  |
| H214 | -0.529011109 | -2.720237522 | -9.465595385  |
| H215 | -0.514218702 | -5.797313744 | -2.169655729  |
| H216 | -1.077927542 | -3.769815348 | -7.222375763  |
| H217 | -0.532066113 | -4.120655119 | -10.334165202 |
| H218 | -6.245777868 | -4.253323176 | -2.769626486  |
| H219 | -3.136234367 | -2.613378903 | -0.558665557  |
| H220 | 1.530616326  | -5.300856146 | -7.428368232  |
| H221 | -1.735662463 | -4.376507896 | -0.910069963  |
| H222 | -4.065854616 | 2.411576199  | 2.903129651   |
| H223 | -2.636221784 | 0.508269076  | 1.369084332   |
| H224 | -8.101098172 | 0.027247805  | 3.648679193   |
| H225 | -7.131658683 | -0.732876835 | 0.927570262   |
| H226 | -7.319597658 | 3.424680110  | 2.202249253   |
| H227 | -9.183011572 | 8.071312120  | 3.800738333   |
| H228 | -7.624782217 | 4.721194250  | 4.994671111   |
| H229 | -9.509556366 | 4.660582039  | 2.978352344   |



|      |               |              |               |
|------|---------------|--------------|---------------|
| H230 | -6.953994702  | 6.291199552  | 2.425532245   |
| H231 | -11.635492078 | 8.468208211  | 0.369193361   |
| H232 | -3.613153866  | 3.984820414  | 1.032793247   |
| H233 | -5.111479382  | 3.517667794  | 0.226483875   |
| H234 | -10.758196225 | 9.592117202  | 2.487814355   |
| H235 | -8.851808305  | 4.847400386  | 1.351919537   |
| H236 | -6.147432649  | 1.341913127  | 1.182806365   |
| H237 | -6.795231721  | -1.118676448 | 3.339793406   |
| H238 | -10.138619221 | 0.477347927  | -0.399840406  |
| H239 | -2.402369421  | 1.068845228  | -2.828544329  |
| H240 | -10.147814331 | -1.274818335 | -0.126336049  |
| H241 | 9.883836948   | 4.203116081  | 2.981790867   |
| H242 | 8.282446116   | 4.207152889  | 2.646637742   |
| H243 | 1.168614532   | 6.444068220  | -1.319028377  |
| H244 | -1.317624802  | 5.984830851  | 0.178367105   |
| H245 | 0.946745904   | 8.697204536  | -0.158052626  |
| H246 | -3.868829620  | 2.997513518  | -1.860730835  |
| H247 | -5.469609475  | 3.576756021  | -3.149686538  |
| H248 | -5.265518650  | 4.879101673  | -2.254141490  |
| H249 | -5.402961411  | 0.762174558  | -4.070991161  |
| H250 | -7.149895375  | 0.431977275  | -4.254237451  |
| H251 | -1.447563326  | 12.178214062 | -2.526200289  |
| H252 | -2.967679287  | 13.099661938 | -2.347941431  |
| H253 | -1.571438447  | 9.877479440  | -2.999986893  |
| H254 | -3.079046484  | 9.006344742  | -2.899780296  |
| H255 | -3.481406418  | 8.552758454  | -6.254344850  |
| H256 | -2.602561053  | 4.041483979  | -5.790906956  |
| H257 | -8.039554756  | 7.875538100  | -0.976200569  |
| H258 | -3.721608583  | 8.413098494  | 1.439811285   |
| H259 | -4.996014885  | 7.074984011  | -3.447151963  |
| H260 | 0.939105373   | 4.979794645  | -3.694048799  |
| H261 | 2.042066412   | 7.123296804  | -3.448643556  |
| H262 | -1.505729044  | 4.382792385  | -3.353489878  |
| H263 | -8.080174883  | -1.467695201 | -1.270950463  |
| H264 | 2.760363972   | 10.018284214 | -4.628390418  |
| H265 | -5.982424255  | -1.718036633 | -3.147724133  |
| H266 | 0.539438203   | 5.692563056  | -5.256773409  |
| H267 | -3.896431633  | 6.793567654  | -0.416154358  |
| H268 | -7.308934850  | 2.412991759  | -2.785378466  |
| H269 | 2.371029837   | 10.592672008 | -2.994153645  |
| H270 | -2.713974958  | 7.123415215  | -6.839524651  |
| H271 | -5.119274240  | 8.321671436  | -4.638540215  |
| H272 | -4.678840792  | -4.171344543 | -3.346155578  |
| H273 | -5.283643562  | -3.865672068 | -0.721445966  |
| H274 | -7.834722360  | 9.584537207  | 0.807024615   |
| H275 | -5.650388600  | 0.759808257  | -1.594386994  |
| H276 | -0.825392473  | 7.457887476  | -4.153778573  |
| H277 | -1.746252487  | 5.529558050  | -6.170445141  |
| H278 | -0.657955304  | 3.598438552  | -4.678057205  |
| H279 | -3.817502563  | 5.185489008  | -4.000962420  |
| H280 | 0.065124174   | 9.804702365  | 2.367363209   |
| H281 | -1.468609779  | 10.273587459 | -0.533000254  |
| H282 | -1.586888537  | 13.188663307 | -0.310990844  |
| H283 | 1.374499143   | 10.379809615 | 1.313230851   |
| H284 | -3.423553606  | 10.736340976 | 1.111124061   |
| H285 | 5.038057032   | -2.628401135 | -9.031338043  |
| H286 | 5.248313595   | -4.044893204 | -7.989752583  |
| H287 | 8.390767348   | -4.351819137 | -4.706006252  |
| H288 | 5.747813706   | -4.675260690 | -10.229888249 |
| H289 | 4.276867611   | -5.328907092 | -9.920852220  |
| H290 | 5.416876384   | 5.702509793  | -0.912695160  |
| H291 | 4.838115338   | 8.357728032  | 0.560728041   |

|      |              |               |              |
|------|--------------|---------------|--------------|
| H292 | 4.309935062  | 8.534192126   | -3.740654851 |
| H293 | 3.793000875  | 6.206590876   | -0.363013570 |
| H294 | 5.950596624  | 9.170214220   | -0.316033211 |
| H295 | 4.992016471  | 3.438139201   | -6.576136376 |
| H296 | 5.684466916  | 7.786756105   | -2.185908842 |
| H297 | 5.844589177  | -5.964166009  | 5.176194256  |
| H298 | 7.817272703  | -6.841437209  | 3.002158388  |
| H299 | 3.619083770  | 1.584274306   | -6.870841000 |
| H300 | 4.761149938  | 0.806011115   | 3.489218262  |
| H301 | 0.569941478  | 1.344505399   | -8.632203696 |
| H302 | -0.960877690 | -2.678157722  | -4.137005905 |
| H303 | 0.300363197  | 1.900882624   | -6.982021207 |
| H304 | 4.550168899  | -3.721204719  | 4.481109525  |
| H305 | 2.246799639  | 0.121975158   | -6.451447045 |
| H306 | 4.521798053  | -4.237755456  | 2.795281399  |
| H307 | 5.478789889  | -6.377166491  | 3.486539606  |
| H308 | 7.006326985  | -4.420412543  | 2.775227441  |
| H309 | 7.077119393  | -3.936888586  | 4.481946317  |
| H310 | -4.875927194 | -1.415511927  | -6.437075273 |
| H311 | 6.793948981  | -8.296906877  | 5.415902061  |
| H312 | 6.125391627  | -10.911247133 | 3.960062557  |
| H313 | 0.311081925  | -0.560243468  | -3.771156327 |
| H314 | 7.463611080  | -10.459308462 | 6.516823526  |
| H315 | 5.960552402  | -11.035962467 | 6.215271275  |
| H316 | 5.676927735  | -2.231331153  | 2.138454444  |
| H317 | -0.542256105 | 1.558544365   | -4.716565800 |
| H318 | -3.068581432 | -2.657275331  | -5.439388445 |
| H319 | 8.685113937  | -8.967486311  | -1.014796707 |
| H320 | 7.429399678  | -6.993315363  | -3.488682671 |
| H321 | 7.349132916  | -7.414196899  | 0.336773898  |
| H322 | 8.041052472  | -9.803886112  | -2.143038306 |
| H323 | 4.923255958  | 2.727237207   | -9.463651641 |
| H324 | 6.886854126  | -4.356640380  | -0.067446429 |
| H325 | 3.201369076  | -7.096796195  | 1.187028217  |
| H326 | 3.629593535  | -1.814335899  | -7.414130454 |
| H327 | 3.993582946  | -8.822666362  | -0.534719942 |
| H328 | 3.930033071  | -6.508897557  | -6.904483012 |
| H329 | 2.905286638  | -5.088381024  | -5.055787531 |
| H330 | 7.807199056  | -11.291682973 | 4.350351092  |
| H331 | 5.199349574  | -0.069031586  | 2.022665976  |
| H332 | 8.968937730  | -4.804456956  | 1.042995358  |
| H333 | 7.494928460  | -2.929364301  | 0.004089602  |
| H334 | 9.643145611  | -5.658693846  | 3.182721115  |
| H335 | 4.707242766  | -2.014623025  | 5.592053052  |
| H336 | 4.178904628  | -11.471904204 | -3.343761362 |
| H337 | 4.357808751  | -7.926807451  | -3.445346050 |
| H338 | 5.696612603  | -7.950009723  | -2.281017137 |
| H339 | 2.716439501  | -8.488440826  | -1.739016085 |
| H340 | 1.725452686  | -2.154011546  | -5.969889144 |
| H341 | -2.656161173 | 1.591505496   | -6.061494331 |
| H342 | -4.846989937 | 0.358414931   | -6.581010009 |
| H343 | 2.656464967  | -5.513891625  | 0.561873923  |
| H344 | 9.204742721  | -6.335765635  | 0.983219936  |
| H345 | 8.234505125  | -8.334635648  | 1.215266114  |
| H346 | 4.180120326  | -0.389441840  | 5.422723951  |
| H347 | 6.399235731  | -7.045361450  | -6.446757927 |
| H348 | 7.093635013  | -5.403769588  | -2.809832954 |
| H349 | 0.931481922  | -3.063210893  | -7.291125125 |
| H350 | 3.802392114  | 4.468535473   | -7.400797672 |
| H351 | 7.448227874  | 1.056505251   | 4.246862979  |
| H352 | 7.530892261  | 1.390859377   | 2.503693127  |
| H353 | 9.737654052  | -5.731336752  | -6.042957674 |

|       |               |               |               |
|-------|---------------|---------------|---------------|
| H354  | 9.206712178   | -7.109187904  | -5.339413891  |
| H355  | 11.239594290  | -7.477653397  | -1.362066426  |
| H356  | 9.405477869   | -7.293757391  | -2.699605370  |
| H357  | 12.452649793  | -6.168647979  | -3.454308131  |
| H358  | 10.876187674  | -5.819086806  | -0.833874995  |
| H359  | 10.253589728  | 1.289893861   | 2.525930242   |
| H360  | -4.365868676  | 13.020736925  | 3.164968817   |
| H361  | 10.747673098  | -5.417941616  | 5.973394179   |
| H362  | 10.005281667  | -3.115291460  | 4.642162681   |
| H363  | -6.056440521  | 11.882822319  | 0.916477050   |
| H364  | -4.853033017  | 9.981234474   | 3.020620754   |
| H365  | -6.575808051  | 10.354415509  | 2.835672009   |
| H366  | -6.964165483  | 6.272138587   | -2.167272425  |
| H367  | -0.034172990  | -1.411444028  | 0.394317858   |
| H368  | 2.354607422   | -2.847183545  | -0.070497244  |
| H369  | -1.577138623  | -0.322769771  | -0.859052474  |
| Mo370 | 4.248617997   | -4.043742964  | -2.232817787  |
| N371  | 2.364049533   | 0.068242834   | 1.296049267   |
| N372  | 2.330980492   | -0.406237139  | 0.270968345   |
| N373  | -6.014180291  | -7.732242528  | -0.402654010  |
| N374  | -8.353537592  | -5.419605392  | 1.365426130   |
| N375  | -8.187179069  | -5.629320685  | 4.188593794   |
| N376  | -5.541952930  | -6.474152779  | 4.591214066   |
| N377  | -4.112094240  | -4.200499684  | 3.608789215   |
| N378  | -4.959706327  | -2.292893180  | 5.539793049   |
| N379  | -4.171015993  | -3.465708720  | 8.066844283   |
| N380  | -1.475392522  | -4.491356932  | 7.856849847   |
| N381  | 0.088260990   | -2.639940246  | 6.503032979   |
| N382  | -0.660401818  | 0.266212085   | 6.846648269   |
| N383  | -1.339228901  | 0.200009021   | 9.616774283   |
| N384  | 6.644140251   | -10.338751976 | 5.917504442   |
| N385  | 7.194702995   | -8.142298465  | 4.484308668   |
| N386  | 5.333834320   | -2.346876626  | 3.095793395   |
| N387  | 4.432445323   | -1.262283706  | 4.969012830   |
| N388  | 4.905306267   | -0.083092498  | 3.020012343   |
| N389  | 9.679392387   | -5.698553938  | 4.223965064   |
| N390  | -5.429731314  | -3.644925090  | -2.862350305  |
| N391  | -1.160506571  | -5.718675827  | -2.956990231  |
| N392  | -6.021126817  | -1.157764314  | -2.279805465  |
| N393  | -8.424955870  | -0.537749821  | -1.045038342  |
| N394  | -7.763859230  | -0.342761298  | 1.637561443   |
| N395  | -5.844863762  | 1.655383699   | 2.101689277   |
| N396  | -3.445345194  | 2.214610010   | -1.304439115  |
| N397  | -2.318399064  | 0.444056676   | -0.766322769  |
| N398  | -6.789973403  | 4.198958014   | 2.595495315   |
| N399  | -10.447473340 | 6.784502535   | 0.998912440   |
| N400  | -10.515975645 | 8.648076273   | 2.200651531   |
| N401  | 9.105798457   | 3.601203520   | 2.701524787   |
| N402  | 5.569862307   | 8.234417488   | -0.146986073  |
| N403  | 3.625123159   | 8.915090005   | -3.092969374  |
| N404  | 1.157122801   | 7.637676832   | -3.597600688  |
| N405  | -3.289029786  | 5.687948905   | -4.737151668  |
| N406  | -3.151445695  | 7.611712294   | -6.066044628  |
| N407  | -4.575342193  | 7.559715833   | -4.242337363  |
| N408  | 0.171454351   | 6.577190424   | -1.136517287  |
| N409  | 0.179002971   | 8.876393940   | 0.496736048   |
| N410  | -1.460498897  | 11.144925293  | -0.000233930  |
| N411  | -2.556793353  | 9.861029233   | -2.710727396  |
| N412  | -3.981808893  | 11.583490339  | 1.043039224   |
| N413  | 4.765364417   | -4.441509965  | -10.070494703 |
| N414  | 2.888246857   | -2.472139670  | -7.685879149  |
| N415  | 1.531296709   | 0.200590874   | -7.199330125  |

|      |              |               |              |
|------|--------------|---------------|--------------|
| N416 | 3.363597227  | 2.418317957   | -7.410040210 |
| N417 | -1.133693141 | -3.377441845  | -9.973196715 |
| N418 | -2.946811661 | -1.672750350  | -8.572045842 |
| N419 | 8.918719694  | -6.162429761  | -5.605104844 |
| N420 | 4.859836317  | -5.198543726  | -4.163887628 |
| N421 | 4.446645335  | -6.177771054  | -6.094080147 |
| N422 | 9.992816326  | -6.459337581  | -2.669007861 |
| N423 | -0.068619298 | 2.364747275   | -0.913171144 |
| N424 | 0.862544031  | 1.840584300   | -1.306440026 |
| O425 | -6.110827454 | -5.705668993  | 1.634712093  |
| O426 | -7.376749749 | -3.500750081  | 4.249940120  |
| O427 | -5.656077096 | -5.719472903  | 6.745742439  |
| O428 | -2.481051042 | -4.739048327  | 5.100552233  |
| O429 | -2.996191608 | -1.198547657  | 5.191665808  |
| O430 | -3.725892623 | -1.324024285  | 8.722681162  |
| O431 | -1.268928321 | -4.151744925  | 10.117329791 |
| O432 | 1.995960930  | -3.877036557  | 6.843433179  |
| O433 | 1.601494224  | 0.300807292   | 7.156718331  |
| O434 | -0.061758115 | 2.067149998   | 9.816616209  |
| O435 | 0.489641330  | 0.075378023   | 12.693082213 |
| O436 | 7.978338548  | -9.342464163  | 2.668785138  |
| O437 | 8.585795492  | -6.286183013  | 6.158601535  |
| O438 | 12.023961849 | -3.065246599  | 4.940252339  |
| O439 | -5.498599322 | -1.342882241  | -0.053237585 |
| O440 | -3.102582147 | -4.933081901  | -3.839828989 |
| O441 | -8.071040685 | 1.704196643   | -1.309572564 |
| O442 | -6.633920253 | 2.315560581   | -3.507539724 |
| O443 | -9.922478883 | 0.233231653   | 2.179945503  |
| O444 | -5.813103435 | 1.184454741   | 4.337353158  |
| O445 | -4.744858790 | 4.867721575   | 3.368292708  |
| O446 | -7.422093986 | 6.750975744   | 4.952102279  |
| O447 | 10.463266470 | 0.909930324   | 4.522050449  |
| O448 | 3.023342034  | 5.353892304   | 3.828252045  |
| O449 | 2.866065995  | 8.954002133   | -0.945724668 |
| O450 | 0.132365160  | 9.683950652   | -3.773845956 |
| O451 | -1.926538031 | 6.785668776   | -2.016970294 |
| O452 | -1.344206370 | 7.878200678   | 1.888269056  |
| O453 | 1.810501654  | 6.248556701   | 1.337361035  |
| O454 | -0.329104860 | 12.354698794  | 1.580252405  |
| O455 | -4.145552634 | 13.633296160  | 0.054801706  |
| O456 | -4.505845556 | 10.989029878  | -2.325227979 |
| O457 | -6.400507482 | 13.174975234  | 3.160441016  |
| O458 | -6.039335208 | 6.317821900   | -1.856015011 |
| O459 | 2.436503222  | -4.542710231  | -8.580184432 |
| O460 | 0.000459556  | -0.985915942  | -8.422220657 |
| O461 | 1.715169737  | 3.663491627   | -8.383507911 |
| O462 | 6.086879286  | 4.304803823   | -8.892350423 |
| O463 | -4.484505050 | -3.341104408  | -8.825120796 |
| O464 | -0.600791301 | -6.820581958  | -5.800797165 |
| O465 | 1.208215229  | -5.804388577  | -6.615004032 |
| O466 | -3.934055493 | 1.738120858   | -8.491994584 |
| O467 | 10.425672912 | -4.319186844  | -3.273064128 |
| O468 | 13.333865152 | -5.549575007  | -1.720075365 |
| O469 | 0.427353283  | -6.481817455  | -0.436564224 |
| O470 | 1.087307166  | -8.391134221  | 0.495027876  |
| O471 | 6.122203815  | -10.387614231 | -2.795825752 |
| O472 | 3.898017104  | -10.548691244 | -3.167418461 |
| O473 | 5.628258324  | -5.297044111  | -1.000137373 |
| O474 | 5.677237918  | -7.037855389  | 0.429818534  |
| O475 | 3.255509378  | -5.869987265  | -1.936462691 |
| O476 | 9.587629161  | -5.503910553  | 1.369967810  |
| O477 | 7.508107761  | -3.793510706  | 0.460244449  |

|                    |                                     |              |              |               |              |
|--------------------|-------------------------------------|--------------|--------------|---------------|--------------|
|                    | O478                                | -4.783290659 | 4.205284324  | -2.792197437  |              |
|                    | O479                                | 8.915186992  | -9.519307295 | -1.804739664  |              |
|                    | O480                                | 8.280664848  | -7.772187025 | 0.399571875   |              |
|                    | S481                                | 3.767992991  | 5.531976968  | -2.708147268  |              |
|                    | S482                                | 2.440643341  | 2.280260655  | -3.878157979  |              |
|                    | S483                                | 2.280754678  | -2.972706625 | -3.108866997  |              |
|                    | S484                                | 3.626811565  | 2.573212991  | -0.505028524  |              |
|                    | S485                                | 0.010841883  | -1.734292649 | -0.927545953  |              |
|                    | S486                                | 4.289235741  | -0.495854560 | -5.487884715  |              |
|                    | S487                                | 3.735246129  | -3.152008522 | 0.012510956   |              |
|                    | S488                                | 5.899734427  | 2.098676165  | -3.164747198  |              |
|                    | S489                                | 5.985859116  | -2.559748028 | -2.858090438  |              |
|                    | S490                                | 6.230989585  | -0.330422208 | 0.029566739   |              |
| <b>20, 35(1/2)</b> | <b>bm2unh2b2n2x6n2n3b2351.car_1</b> |              |              |               |              |
| Fe1                | 2.92                                | C1           | -7.172960280 | -6.048976381  | 1.091127001  |
| Fe2                | -0.99                               | C2           | -7.265757048 | -7.252474265  | 0.148357351  |
| Fe3                | -2.28                               | C3           | -8.388188997 | -4.214363755  | 2.182484459  |
| Fe4                | 2.77                                | C4           | -7.935286026 | -4.417979400  | 3.626728951  |
| Fe5                | -2.52                               | C5           | -7.743741482 | -5.927041351  | 5.536281304  |
| Fe6                | -0.48                               | C6           | -6.220157221 | -6.022308349  | 5.676538153  |
| Fe7                | 2.12                                | C7           | -4.091924975 | -6.475419113  | 4.553887041  |
|                    |                                     | C8           | -3.483358515 | -5.073569213  | 4.447576362  |
|                    |                                     | C9           | -3.658789079 | -2.823583868  | 3.523495594  |
|                    |                                     | C10          | -3.836720388 | -2.038104373  | 4.832819482  |
|                    |                                     | C11          | -5.182596857 | -1.615260462  | 6.808104068  |
|                    |                                     | C12          | -4.285873168 | -2.120711044  | 7.947302729  |
|                    |                                     | C13          | -3.486584778 | -4.058164434  | 9.209284146  |
|                    |                                     | C14          | -1.963541421 | -4.209901059  | 9.095717669  |
|                    |                                     | C15          | -0.065967203 | -4.794339460  | 7.642799488  |
|                    |                                     | C16          | 0.774840736  | -3.708920579  | 6.963043343  |
|                    |                                     | C17          | 0.709253469  | -1.509676996  | 5.807351977  |
|                    |                                     | C18          | 0.593259280  | -0.232770256  | 6.659748542  |
|                    |                                     | C19          | 0.164094784  | -1.341507609  | 4.371217907  |
|                    |                                     | C20          | 0.595357639  | 0.001263649   | 3.779468013  |
|                    |                                     | C21          | 0.598951387  | -2.526052695  | 3.501705980  |
|                    |                                     | C22          | -0.873573845 | 1.509504591   | 7.583244411  |
|                    |                                     | C23          | -0.721861632 | 1.284881426   | 9.098822347  |
|                    |                                     | C24          | -2.221662496 | 2.164734033   | 7.195465924  |
|                    |                                     | C25          | -2.505490633 | 3.400447709   | 8.058535360  |
|                    |                                     | C26          | -2.228734250 | 2.542964068   | 5.708421135  |
|                    |                                     | C27          | -1.259754418 | -0.077604072  | 11.032300205 |
|                    |                                     | C28          | 0.172731737  | -0.140766593  | 11.523721361 |
|                    |                                     | C29          | 7.004345486  | -10.550188073 | 4.492419366  |
|                    |                                     | C30          | 7.453633909  | -9.271870734  | 3.786085889  |
|                    |                                     | C31          | 7.498304838  | -6.785251561  | 4.045992160  |
|                    |                                     | C32          | 8.647691138  | -6.234347554  | 4.911663866  |
|                    |                                     | C33          | 6.233987604  | -5.914366345  | 4.153405689  |
|                    |                                     | C34          | 6.459785031  | -4.458094993  | 3.743256426  |
|                    |                                     | C35          | 5.131121013  | -3.721459894  | 3.569566595  |
|                    |                                     | C36          | 4.892296954  | -1.228430782  | 3.718338568  |
|                    |                                     | C37          | 10.849336091 | -5.162453798  | 4.892127785  |
|                    |                                     | C38          | 10.968357938 | -3.656073587  | 4.803397135  |
|                    |                                     | C39          | -4.940371184 | -3.213988398  | -1.551533870 |
|                    |                                     | C40          | -5.507337763 | -1.824650874  | -1.211100920 |
|                    |                                     | C41          | -3.402395319 | -3.141628658  | -1.491756827 |
|                    |                                     | C42          | -2.660276130 | -4.493280736  | -1.488332074 |
|                    |                                     | C43          | -2.327167259 | -5.061797354  | -2.865546642 |
|                    |                                     | C44          | -6.397530399 | 0.232892072   | -2.218913033 |
|                    |                                     | C45          | -7.721875650 | 0.512672807   | -1.500512844 |
|                    |                                     | C46          | -6.390257410 | 0.899263385   | -3.610725006 |
|                    |                                     | C47          | -9.516045691 | -0.383370123  | -0.104778880 |

|      |               |              |              |
|------|---------------|--------------|--------------|
| C48  | -9.080820462  | -0.133063899 | 1.346904616  |
| C49  | -7.248080590  | -0.179981351 | 2.984652362  |
| C50  | -6.226834844  | 0.935342342  | 3.201621645  |
| C51  | -4.866326177  | 2.732217693  | 2.218900921  |
| C52  | -5.458569989  | 4.026997160  | 2.826418959  |
| C53  | -4.292600272  | 3.139020934  | 0.851868268  |
| C54  | -3.547368784  | 2.096454260  | 0.077969425  |
| C55  | -2.824056883  | 0.976023033  | 0.411982289  |
| C56  | -2.684186669  | 1.218328325  | -1.783197497 |
| C57  | -7.476058984  | 5.454964925  | 2.903585079  |
| C58  | -7.496086022  | 5.670094268  | 4.414351030  |
| C59  | -8.912981422  | 5.348353622  | 2.344955520  |
| C60  | -9.640059170  | 6.644218711  | 2.133190628  |
| C61  | -9.673392955  | 7.795781904  | 2.895489645  |
| C62  | -10.959250505 | 8.016043258  | 1.104106771  |
| C63  | 8.895435756   | 2.576165407  | 3.705485946  |
| C64  | 9.972207576   | 1.516561840  | 3.563936876  |
| C65  | 7.536124041   | 1.863715869  | 3.489392281  |
| C66  | 6.354073626   | 2.796717708  | 3.604481047  |
| C67  | 5.745515127   | 3.059276300  | 4.845923967  |
| C68  | 5.819830568   | 3.422860188  | 2.463559414  |
| C69  | 4.636294602   | 3.907662863  | 4.947119529  |
| C70  | 4.722602057   | 4.279530093  | 2.550039071  |
| C71  | 4.127550005   | 4.515900532  | 3.792390442  |
| C72  | 4.941194933   | 7.747877374  | -1.380289107 |
| C73  | 3.722057992   | 8.588389315  | -1.777723772 |
| C74  | 4.535432431   | 6.271579284  | -1.220703462 |
| C75  | 2.517547802   | 9.693260888  | -3.608966584 |
| C76  | 1.162495686   | 8.989333375  | -3.647450161 |
| C77  | -0.087840827  | 6.875995008  | -3.581276522 |
| C78  | -0.697631178  | 6.743123201  | -2.172267847 |
| C79  | 0.146389138   | 5.507035369  | -4.243917865 |
| C80  | -1.055924625  | 4.561775031  | -4.343945512 |
| C81  | -2.166381699  | 4.941431442  | -5.342516712 |
| C82  | -3.668855511  | 6.918843364  | -5.032481506 |
| C83  | -0.332552345  | 6.471929262  | 0.234091499  |
| C84  | -0.551523643  | 7.822884462  | 0.944886158  |
| C85  | 0.558310270   | 5.586164516  | 1.107461378  |
| C86  | 0.321674984   | 10.075267067 | 1.335286441  |
| C87  | -0.513886153  | 11.301522589 | 0.977209403  |
| C88  | -2.207524697  | 12.300819862 | -0.504062769 |
| C89  | -3.543507053  | 12.568580578 | 0.221522060  |
| C90  | -2.430976360  | 12.193211983 | -2.030502537 |
| C91  | -3.267671377  | 10.973227701 | -2.394344147 |
| C92  | -5.301150600  | 11.630331679 | 1.666302165  |
| C93  | -5.364073815  | 12.706115975 | 2.744919976  |
| C94  | -5.636783111  | 10.243078468 | 2.280828822  |
| C95  | -5.761816732  | 9.157898457  | 1.234195005  |
| C96  | -6.971958825  | 8.972465021  | 0.546272310  |
| C97  | -4.672960014  | 8.339664228  | 0.891038827  |
| C98  | -7.092846669  | 8.014163704  | -0.462408808 |
| C99  | -4.767968567  | 7.391354890  | -0.132981876 |
| C100 | -5.980949453  | 7.244409509  | -0.803613623 |
| C101 | 4.658453849   | -3.657621530 | -8.842424923 |
| C102 | 3.215803930   | -3.593564762 | -8.369574845 |
| C103 | 1.594298542   | -2.230942113 | -7.060253474 |
| C104 | 0.962667074   | -0.948783679 | -7.614388676 |
| C105 | 1.069520979   | 1.495216403  | -7.649004573 |
| C106 | 2.103133426   | 2.596802255  | -7.863782835 |
| C107 | 4.343319239   | 3.488548954  | -7.474947893 |
| C108 | 5.198470762   | 3.488623629  | -8.726107031 |
| C109 | -2.155052734  | -3.948647780 | -9.097371046 |

|       |              |              |              |
|-------|--------------|--------------|--------------|
| C110  | -3.299902899 | -2.961545762 | -8.834376338 |
| C111  | -1.660405287 | -4.541989720 | -7.757574276 |
| C112  | -0.807772148 | -5.804621155 | -7.989196909 |
| C113  | -0.083643524 | -6.206413454 | -6.724208455 |
| C114  | -3.949394047 | -0.674122217 | -8.241790460 |
| C115  | -3.621242513 | 0.641537228  | -8.921705138 |
| C116  | -4.248481999 | -0.556173293 | -6.724943439 |
| C117  | -3.010900964 | -0.533871935 | -5.859947832 |
| C118  | -2.288994995 | 0.652411647  | -5.633279667 |
| C119  | -2.519681227 | -1.727919046 | -5.304164051 |
| C120  | -1.107104804 | 0.634583062  | -4.882445969 |
| C121  | -1.335427653 | -1.745626120 | -4.559686280 |
| C122  | -0.618754200 | -0.562983193 | -4.350490355 |
| C123  | 8.549350435  | -5.398804612 | -4.399428534 |
| C124  | 9.710269213  | -5.336531774 | -3.390895310 |
| C125  | 7.259998760  | -5.928176391 | -3.748635075 |
| C126  | 6.015607626  | -5.832016222 | -4.578280937 |
| C127  | 5.750827329  | -6.443728901 | -5.787439144 |
| C128  | 3.925331969  | -5.407460431 | -5.074729897 |
| C129  | 11.088520391 | -6.442151713 | -1.719719663 |
| C130  | 12.385904078 | -5.995394196 | -2.357942941 |
| C131  | 1.328716222  | -7.112851297 | 0.095938720  |
| C132  | 2.719691090  | -6.594899251 | 0.343815143  |
| C133  | 3.668973312  | -6.706129939 | -0.915334057 |
| C134  | 3.720044509  | -8.184928624 | -1.389361405 |
| C135  | 4.737902351  | -8.401665691 | -2.520188056 |
| C136  | 5.022453868  | -9.846268666 | -2.825115529 |
| C137  | 5.098226598  | -6.327728197 | -0.414868728 |
| C138  | 3.722929299  | -0.300680660 | -2.156069779 |
| Fe139 | 4.086613861  | -1.668948490 | -3.584258516 |
| Fe140 | 2.465923969  | 1.279647474  | -1.855777785 |
| Fe141 | 5.013064682  | 0.997956162  | -1.366888055 |
| Fe142 | 4.137569919  | 0.857580634  | -3.806636661 |
| Fe143 | 4.072499727  | 3.262086977  | -2.512622565 |
| Fe144 | 4.844060074  | -1.581125250 | -1.152618796 |
| Fe145 | 2.262535807  | -1.288485513 | -1.295211822 |
| H146  | -5.332720746 | -7.869327533 | 0.356289168  |
| H147  | -5.602669057 | -7.033093622 | -1.020566767 |
| H148  | -9.181886148 | -5.676517154 | 0.839103054  |
| H149  | -7.960074477 | -7.018720626 | -0.674246565 |
| H150  | -7.744242859 | -8.061918483 | 0.727075359  |
| H151  | -7.739279762 | -3.430988958 | 1.765751578  |
| H152  | -8.669655490 | -6.336216146 | 3.635694145  |
| H153  | -9.420657756 | -3.840379709 | 2.192829351  |
| H154  | -8.189626773 | -6.880723834 | 5.848586309  |
| H155  | -6.046492554 | -6.577188471 | 3.707663075  |
| H156  | -8.078554211 | -5.147277993 | 6.232349505  |
| H157  | -2.590249896 | -2.782730043 | 3.273621303  |
| H158  | -4.876783314 | -4.527254704 | 3.021032113  |
| H159  | -3.764182772 | -7.081890319 | 3.698244804  |
| H160  | -4.989960478 | -0.541112844 | 6.696494430  |
| H161  | -5.692754091 | -2.897094571 | 5.154451041  |
| H162  | -3.695819309 | -6.929024830 | 5.470567928  |
| H163  | -4.220689885 | -2.332062911 | 2.716347024  |
| H164  | -4.710838846 | -4.087686295 | 7.457355156  |
| H165  | -6.233949094 | -1.756819724 | 7.096299910  |
| H166  | 0.306241001  | -3.483128395 | 3.958878891  |
| H167  | 0.127170763  | -2.474209952 | 2.508495556  |
| H168  | 1.689565580  | -2.530668517 | 3.348896471  |
| H169  | -0.935128010 | -1.348919070 | 4.434604277  |
| H170  | -3.909333580 | -5.059019035 | 9.380913345  |
| H171  | -2.095991325 | 1.670337539  | 5.053733572  |

|      |               |              |               |
|------|---------------|--------------|---------------|
| H172 | -1.979979790  | -0.371650109 | 9.047746891   |
| H173 | -2.589400835  | 3.154679380  | 9.126570070   |
| H174 | 0.210211989   | 0.110336377  | 2.756615428   |
| H175 | 1.688798413   | 0.080359946  | 3.717912241   |
| H176 | 8.923699997   | 2.943699313  | 4.749375412   |
| H177 | -3.184332388  | 3.017006370  | 5.441060687   |
| H178 | -3.449801995  | 3.866363125  | 7.739918701   |
| H179 | -1.420200658  | 3.260559948  | 5.492884854   |
| H180 | -1.702782281  | 4.145994753  | 7.944044377   |
| H181 | -3.022630363  | 1.425180907  | 7.375782051   |
| H182 | -0.057057489  | 2.201756338  | 7.325191227   |
| H183 | -1.458026954  | -0.166833458 | 6.366278455   |
| H184 | 0.220040206   | 0.849834216  | 4.369658555   |
| H185 | 0.695992701   | 4.613681879  | 0.602617325   |
| H186 | 0.023831282   | 5.418099008  | 2.055946008   |
| H187 | 2.185760977   | 5.894292607  | 2.162892594   |
| H188 | 2.679864900   | 5.415433598  | 4.724894372   |
| H189 | 4.305170298   | 4.735528681  | 1.651449958   |
| H190 | 6.247605023   | 3.211723034  | 1.480468656   |
| H191 | 6.133613223   | 2.585752885  | 5.752160598   |
| H192 | -0.925828823  | -2.650795759 | 6.594601748   |
| H193 | 0.025045106   | -5.704491560 | 7.032125897   |
| H194 | 0.395259003   | -4.990961484 | 8.619792525   |
| H195 | -2.109567113  | -4.641765162 | 7.067777989   |
| H196 | -3.669276288  | -3.448461073 | 10.103087796  |
| H197 | 4.164163932   | 4.085319165  | 5.917285367   |
| H198 | 1.783254433   | -1.733853678 | 5.771032659   |
| H199 | -1.809737258  | 0.660671788  | 11.638765417  |
| H200 | -1.708409470  | -1.067874816 | 11.211881765  |
| H201 | 0.921169319   | -0.453029333 | 10.757567838  |
| H202 | 11.774871367  | -5.623898434 | 4.514645215   |
| H203 | -0.895574922  | -6.136243463 | -3.861848502  |
| H204 | 1.882912116   | -8.774941040 | 0.903650628   |
| H205 | -1.462093612  | -6.635382818 | -8.290536620  |
| H206 | -0.083528784  | -5.627578728 | -8.797837767  |
| H207 | -2.515642630  | -4.801468110 | -7.114563958  |
| H208 | -3.093119711  | 0.532138258  | -9.898021909  |
| H209 | -2.641577525  | -4.761171205 | -9.658909715  |
| H210 | -3.045086873  | -2.521228322 | -2.328113853  |
| H211 | -3.258282045  | -5.255226874 | -0.957353799  |
| H212 | -1.955880986  | -1.421218290 | -8.493355323  |
| H213 | -4.882846771  | -1.012445199 | -8.733811030  |
| H214 | -0.525834146  | -2.716229171 | -9.465008148  |
| H215 | -0.510054135  | -5.799212164 | -2.174660316  |
| H216 | -1.081636218  | -3.772409570 | -7.223702017  |
| H217 | -0.524781954  | -4.116989372 | -10.331803722 |
| H218 | -6.241643127  | -4.258109917 | -2.772559077  |
| H219 | -3.131145717  | -2.613362840 | -0.567236405  |
| H220 | 1.523154065   | -5.304683434 | -7.426772979  |
| H221 | -1.727682639  | -4.371543221 | -0.919520959  |
| H222 | -4.065754050  | 2.412086881  | 2.900288183   |
| H223 | -2.637763713  | 0.514784755  | 1.375201934   |
| H224 | -8.100271248  | 0.030571524  | 3.644937656   |
| H225 | -7.127763275  | -0.728737991 | 0.924473046   |
| H226 | -7.316910481  | 3.432286101  | 2.204819259   |
| H227 | -9.176419244  | 8.080235235  | 3.816773694   |
| H228 | -7.623792516  | 4.727270728  | 5.000970858   |
| H229 | -9.501019667  | 4.667895957  | 2.986911559   |
| H230 | -6.943725600  | 6.296126213  | 2.432985339   |
| H231 | -11.639901698 | 8.477064445  | 0.393233935   |
| H232 | -3.623099652  | 3.995749556  | 1.031609436   |
| H233 | -5.118086326  | 3.515267822  | 0.225237851   |



|      |               |              |               |
|------|---------------|--------------|---------------|
| H234 | -10.756688945 | 9.600332105  | 2.509812017   |
| H235 | -8.848746076  | 4.860555789  | 1.359254901   |
| H236 | -6.172121909  | 1.362743852  | 1.184819779   |
| H237 | -6.797153065  | -1.119556058 | 3.338053747   |
| H238 | -10.139849030 | 0.469357449  | -0.402470197  |
| H239 | -2.403909170  | 1.062585007  | -2.821959761  |
| H240 | -10.145589754 | -1.282745263 | -0.126166583  |
| H241 | 9.888285675   | 4.211832669  | 2.970169929   |
| H242 | 8.285852202   | 4.213939759  | 2.639037854   |
| H243 | 1.167158011   | 6.490502120  | -1.308672429  |
| H244 | -1.323261615  | 5.999617689  | 0.180345440   |
| H245 | 0.946737625   | 8.709244550  | -0.152323269  |
| H246 | -3.868310434  | 2.994795218  | -1.862870668  |
| H247 | -5.470033609  | 3.571377306  | -3.148500061  |
| H248 | -5.270330156  | 4.878234692  | -2.259025578  |
| H249 | -5.403792453  | 0.757169109  | -4.073748439  |
| H250 | -7.150893671  | 0.428173095  | -4.256203687  |
| H251 | -1.447869321  | 12.172423658 | -2.523285509  |
| H252 | -2.969150145  | 13.093802162 | -2.352491382  |
| H253 | -1.570896897  | 9.870409765  | -2.987888509  |
| H254 | -3.077086949  | 8.997752158  | -2.885832857  |
| H255 | -3.459547619  | 8.551776913  | -6.245861073  |
| H256 | -2.592828337  | 4.030032222  | -5.787229853  |
| H257 | -8.046372530  | 7.869364706  | -0.976209461  |
| H258 | -3.724978765  | 8.419319150  | 1.430892577   |
| H259 | -4.991087141  | 7.066528936  | -3.451583930  |
| H260 | 0.945625652   | 4.981960027  | -3.696363372  |
| H261 | 2.045743244   | 7.122213188  | -3.465922827  |
| H262 | -1.498228346  | 4.381406991  | -3.351559689  |
| H263 | -8.081452080  | -1.474055220 | -1.276022255  |
| H264 | 2.756959672   | 10.013534879 | -4.632132760  |
| H265 | -5.980780804  | -1.722958184 | -3.150974791  |
| H266 | 0.541382961   | 5.696276462  | -5.255736789  |
| H267 | -3.898983603  | 6.798451427  | -0.424556090  |
| H268 | -7.310110858  | 2.408409156  | -2.788690907  |
| H269 | 2.373537381   | 10.595928399 | -2.999189984  |
| H270 | -2.695112730  | 7.122473753  | -6.833692130  |
| H271 | -5.105056556  | 8.319686404  | -4.636652901  |
| H272 | -4.675670609  | -4.176164306 | -3.350979883  |
| H273 | -5.277041654  | -3.870220211 | -0.726631406  |
| H274 | -7.842561740  | 9.579193494  | 0.806567611   |
| H275 | -5.650801394  | 0.754105589  | -1.596246439  |
| H276 | -0.824039406  | 7.458089997  | -4.152794644  |
| H277 | -1.740701610  | 5.518712764  | -6.172898873  |
| H278 | -0.644571285  | 3.597338307  | -4.672448002  |
| H279 | -3.816192428  | 5.176973072  | -4.007097401  |
| H280 | 0.065013762   | 9.816685392  | 2.373633362   |
| H281 | -1.471177925  | 10.277039082 | -0.525107102  |
| H282 | -1.593694018  | 13.192663333 | -0.311530563  |
| H283 | 1.372848202   | 10.393585713 | 1.318565221   |
| H284 | -3.425233680  | 10.741098991 | 1.115974855   |
| H285 | 5.033262344   | -2.640992421 | -9.030976478  |
| H286 | 5.240488211   | -4.055880986 | -7.985679962  |
| H287 | 8.386782815   | -4.356682766 | -4.711329053  |
| H288 | 5.748381128   | -4.687738181 | -10.222816005 |
| H289 | 4.277436848   | -5.343565190 | -9.919476985  |
| H290 | 5.433365004   | 5.711940874  | -0.932046939  |
| H291 | 4.812295429   | 8.333542248  | 0.566338664   |
| H292 | 4.311195053   | 8.535304766  | -3.743037002  |
| H293 | 3.790792582   | 6.182050825  | -0.416122869  |
| H294 | 5.944729161   | 9.153802070  | -0.277612780  |
| H295 | 5.001954642   | 3.429199804  | -6.594090094  |

|      |              |               |              |
|------|--------------|---------------|--------------|
| H296 | 5.698567439  | 7.810632386   | -2.177238997 |
| H297 | 5.853280619  | -5.966744534  | 5.186945160  |
| H298 | 7.812691751  | -6.833609390  | 2.996440828  |
| H299 | 3.631760789  | 1.566887245   | -6.900068407 |
| H300 | 4.751242076  | 0.806530080   | 3.513554713  |
| H301 | 0.552230475  | 1.341256093   | -8.604534953 |
| H302 | -0.967466909 | -2.684457110  | -4.140095632 |
| H303 | 0.323976485  | 1.912718066   | -6.952218351 |
| H304 | 4.548822232  | -3.719658103  | 4.500248257  |
| H305 | 2.235777331  | 0.122396858   | -6.429112217 |
| H306 | 4.514336163  | -4.234533920  | 2.813532670  |
| H307 | 5.476206302  | -6.374523052  | 3.498386194  |
| H308 | 6.999495211  | -4.413149568  | 2.785041231  |
| H309 | 7.075561577  | -3.934039930  | 4.492226817  |
| H310 | -4.874952178 | -1.415699387  | -6.444617516 |
| H311 | 6.791523458  | -8.302083668  | 5.403672625  |
| H312 | 6.122814363  | -10.908047484 | 3.938792453  |
| H313 | 0.306369880  | -0.569457597  | -3.769285248 |
| H314 | 7.457137969  | -10.464953537 | 6.499630299  |
| H315 | 5.955366311  | -11.042298383 | 6.193811096  |
| H316 | 5.657530818  | -2.228658553  | 2.151395038  |
| H317 | -0.539285047 | 1.551400254   | -4.712999402 |
| H318 | -3.072429903 | -2.659365919  | -5.447152408 |
| H319 | 8.688394165  | -8.960339916  | -1.021771053 |
| H320 | 7.415893819  | -6.989198864  | -3.481596026 |
| H321 | 7.349507762  | -7.410247802  | 0.332864500  |
| H322 | 8.042919509  | -9.795552073  | -2.149812347 |
| H323 | 4.948816889  | 2.699241702   | -9.475862245 |
| H324 | 6.879862924  | -4.346648832  | -0.038719747 |
| H325 | 3.193895967  | -7.119249921  | 1.186145101  |
| H326 | 3.631159172  | -1.827394041  | -7.416321358 |
| H327 | 3.996907697  | -8.810250675  | -0.526464899 |
| H328 | 3.907915585  | -6.499179141  | -6.882806662 |
| H329 | 2.899242285  | -5.064595537  | -5.034880174 |
| H330 | 7.802310222  | -11.295090042 | 4.330690381  |
| H331 | 5.185086689  | -0.062963934  | 2.040234314  |
| H332 | 8.965782346  | -4.795610238  | 1.044860006  |
| H333 | 7.513140631  | -2.930798476  | -0.008897754 |
| H334 | 9.639677699  | -5.647967505  | 3.175750186  |
| H335 | 4.700898215  | -2.015105419  | 5.610020243  |
| H336 | 4.191260483  | -11.465852717 | -3.342594360 |
| H337 | 4.366316941  | -7.917851994  | -3.436450377 |
| H338 | 5.700712674  | -7.944456966  | -2.266113169 |
| H339 | 2.719816089  | -8.486215136  | -1.732566733 |
| H340 | 1.728360922  | -2.164620678  | -5.967964505 |
| H341 | -2.651206165 | 1.588563481   | -6.066746202 |
| H342 | -4.845149495 | 0.358542624   | -6.585911503 |
| H343 | 2.646474013  | -5.526731264  | 0.585074685  |
| H344 | 9.204616113  | -6.327100734  | 0.978655052  |
| H345 | 8.239163806  | -8.328256930  | 1.208056046  |
| H346 | 4.166423458  | -0.391175052  | 5.441696891  |
| H347 | 6.379106652  | -7.039602913  | -6.438755725 |
| H348 | 7.089226044  | -5.395322903  | -2.805335400 |
| H349 | 0.926685890  | -3.063629492  | -7.291864686 |
| H350 | 3.816109129  | 4.454878095   | -7.428399251 |
| H351 | 7.459146735  | 1.060327511   | 4.237260426  |
| H352 | 7.538962308  | 1.392539183   | 2.493514531  |
| H353 | 9.724798837  | -5.748456856  | -6.043850991 |
| H354 | 9.190360720  | -7.120633019  | -5.332436198 |
| H355 | 11.238332284 | -7.473892905  | -1.363828736 |
| H356 | 9.403869273  | -7.296893859  | -2.700852833 |
| H357 | 12.451718419 | -6.170284121  | -3.458534024 |

|       |               |               |               |
|-------|---------------|---------------|---------------|
| H358  | 10.872665211  | -5.814382992  | -0.840349479  |
| H359  | 10.262600717  | 1.300971407   | 2.506936507   |
| H360  | -4.379340338  | 13.021795564  | 3.163476206   |
| H361  | 10.755763817  | -5.415465176  | 5.962789395   |
| H362  | 10.008038266  | -3.111168695  | 4.632585805   |
| H363  | -6.061379229  | 11.880944391  | 0.909731344   |
| H364  | -4.860273842  | 9.980359816   | 3.016139715   |
| H365  | -6.582710656  | 10.353582146  | 2.830474571   |
| H366  | -6.968558114  | 6.269411341   | -2.170422826  |
| H367  | -0.072331734  | -1.443816891  | 0.407236127   |
| H368  | 2.341948473   | -2.894047025  | -0.058922500  |
| H369  | -1.576888916  | -0.327472210  | -0.850302478  |
| Mo370 | 4.250760293   | -4.036166752  | -2.222080772  |
| N371  | 2.323841406   | 0.056925392   | 1.289154818   |
| N372  | 2.291809287   | -0.398230226  | 0.253277965   |
| N373  | -6.010313298  | -7.735552676  | -0.398865587  |
| N374  | -8.348509945  | -5.414499921  | 1.360022567   |
| N375  | -8.190120427  | -5.626799198  | 4.184835765   |
| N376  | -5.546813989  | -6.476107480  | 4.590230616   |
| N377  | -4.110299048  | -4.204971090  | 3.613683491   |
| N378  | -4.961215719  | -2.297366609  | 5.543349116   |
| N379  | -4.172147428  | -3.468824580  | 8.069210070   |
| N380  | -1.471912809  | -4.490050853  | 7.855239669   |
| N381  | 0.087416698   | -2.637212168  | 6.494512613   |
| N382  | -0.662872324  | 0.266381600   | 6.839514059   |
| N383  | -1.339018388  | 0.190663584   | 9.610459023   |
| N384  | 6.638868962   | -10.343851608 | 5.898756009   |
| N385  | 7.195778201   | -8.143546471  | 4.474180397   |
| N386  | 5.325932548   | -2.343325555  | 3.112719501   |
| N387  | 4.424145990   | -1.262520878  | 4.987947169   |
| N388  | 4.884798431   | -0.080700433  | 3.037602516   |
| N389  | 9.678808713   | -5.691501335  | 4.216797851   |
| N390  | -5.426167955  | -3.649193282  | -2.866969792  |
| N391  | -1.156312032  | -5.721401964  | -2.962124587  |
| N392  | -6.020975845  | -1.163341103  | -2.282707349  |
| N393  | -8.424529866  | -0.544149788  | -1.047147069  |
| N394  | -7.761259272  | -0.340380768  | 1.634398362   |
| N395  | -5.847058069  | 1.659545786   | 2.101655689   |
| N396  | -3.444181923  | 2.216120747   | -1.302605069  |
| N397  | -2.317049488  | 0.447016093   | -0.758312583  |
| N398  | -6.786487046  | 4.203882097   | 2.602418741   |
| N399  | -10.446930463 | 6.794550977   | 1.017267356   |
| N400  | -10.514515246 | 8.656490916   | 2.221450219   |
| N401  | 9.110355321   | 3.609176949   | 2.690642881   |
| N402  | 5.555082930   | 8.217896303   | -0.131017714  |
| N403  | 3.627665128   | 8.917454758   | -3.094535536  |
| N404  | 1.158394631   | 7.637649060   | -3.592874412  |
| N405  | -3.285184398  | 5.678853848   | -4.741817695  |
| N406  | -3.132163824  | 7.609491642   | -6.059147786  |
| N407  | -4.565639819  | 7.553363479   | -4.242800344  |
| N408  | 0.166212521   | 6.589663713   | -1.131782427  |
| N409  | 0.180068276   | 8.886999702   | 0.504036585   |
| N410  | -1.463680412  | 11.150088796  | 0.005012099   |
| N411  | -2.555698752  | 9.852951988   | -2.696823341  |
| N412  | -3.987352170  | 11.585281743  | 1.041931215   |
| N413  | 4.764998219   | -4.455310328  | -10.067292729 |
| N414  | 2.885350362   | -2.480975366  | -7.689030949  |
| N415  | 1.533608245   | 0.198884877   | -7.186393846  |
| N416  | 3.375268331   | 2.406107428   | -7.429532468  |
| N417  | -1.128496898  | -3.373797392  | -9.974435501  |
| N418  | -2.946726785  | -1.669696358  | -8.581989704  |
| N419  | 8.905140483   | -6.174137160  | -5.602119020  |

|      |              |               |              |
|------|--------------|---------------|--------------|
| N420 | 4.857387721  | -5.179587506  | -4.154017905 |
| N421 | 4.431253147  | -6.164287364  | -6.078112066 |
| N422 | 9.990272542  | -6.461331260  | -2.673092042 |
| N423 | -0.061352228 | 2.398727687   | -0.912096412 |
| N424 | 0.872102267  | 1.880549764   | -1.303277855 |
| O425 | -6.106890369 | -5.704628177  | 1.635409666  |
| O426 | -7.375659911 | -3.500022886  | 4.247863986  |
| O427 | -5.661822903 | -5.721507688  | 6.744892807  |
| O428 | -2.478738511 | -4.752829213  | 5.101833307  |
| O429 | -2.991658122 | -1.210437313  | 5.206635183  |
| O430 | -3.734145265 | -1.326670988  | 8.727685672  |
| O431 | -1.259425666 | -4.120918070  | 10.110180710 |
| O432 | 2.000718223  | -3.859392353  | 6.856890062  |
| O433 | 1.600426739  | 0.309147011   | 7.140254168  |
| O434 | -0.063607733 | 2.058893150   | 9.813093041  |
| O435 | 0.491632482  | 0.064716218   | 12.685343686 |
| O436 | 7.984054028  | -9.339585193  | 2.657390902  |
| O437 | 8.601552494  | -6.303869802  | 6.152446211  |
| O438 | 12.026604850 | -3.060132660  | 4.929037102  |
| O439 | -5.498635289 | -1.350293037  | -0.056014456 |
| O440 | -3.100532252 | -4.940546516  | -3.843600420 |
| O441 | -8.071386926 | 1.698117358   | -1.310778182 |
| O442 | -6.633400410 | 2.311158123   | -3.509141514 |
| O443 | -9.922201320 | 0.226630557   | 2.177948254  |
| O444 | -5.790481871 | 1.164758383   | 4.331936926  |
| O445 | -4.738498374 | 4.865951339   | 3.375060356  |
| O446 | -7.412463194 | 6.756595276   | 4.959130233  |
| O447 | 10.479006938 | 0.918359160   | 4.502082642  |
| O448 | 3.029276886  | 5.353140706   | 3.817066330  |
| O449 | 2.863987531  | 8.947437435   | -0.949072612 |
| O450 | 0.131909143  | 9.683232962   | -3.760298927 |
| O451 | -1.930487733 | 6.768839032   | -2.022938804 |
| O452 | -1.344001507 | 7.890278212   | 1.895328718  |
| O453 | 1.810676102  | 6.240199828   | 1.326709526  |
| O454 | -0.334043052 | 12.365408436  | 1.582645424  |
| O455 | -4.154084112 | 13.632680154  | 0.049188384  |
| O456 | -4.506402387 | 10.983654981  | -2.324914587 |
| O457 | -6.414531631 | 13.173950985  | 3.151827389  |
| O458 | -6.044031090 | 6.316588459   | -1.858698268 |
| O459 | 2.427817206  | -4.551097978  | -8.583679541 |
| O460 | 0.012424991  | -0.984111521  | -8.425401677 |
| O461 | 1.725501902  | 3.651466245   | -8.401330316 |
| O462 | 6.100547157  | 4.288767482   | -8.913892158 |
| O463 | -4.483144473 | -3.339827233  | -8.831867280 |
| O464 | -0.611517003 | -6.825883033  | -5.806245223 |
| O465 | 1.199242400  | -5.805876043  | -6.612489902 |
| O466 | -3.933774252 | 1.741801050   | -8.489598529 |
| O467 | 10.422148945 | -4.321735095  | -3.280294069 |
| O468 | 13.330668591 | -5.545532536  | -1.725182333 |
| O469 | 0.417697721  | -6.490010747  | -0.427801350 |
| O470 | 1.078922587  | -8.402731543  | 0.493543837  |
| O471 | 6.130449050  | -10.377627994 | -2.794198893 |
| O472 | 3.907092059  | -10.544269967 | -3.162038769 |
| O473 | 5.623710336  | -5.285496722  | -0.977221642 |
| O474 | 5.676576706  | -7.038436552  | 0.438444909  |
| O475 | 3.253052298  | -5.859385946  | -1.924214631 |
| O476 | 9.587874219  | -5.495525064  | 1.365877514  |
| O477 | 7.499309442  | -3.775034742  | 0.482247699  |
| O478 | -4.786525720 | 4.205185670   | -2.795479199 |
| O479 | 8.917526527  | -9.511242127  | -1.812387415 |
| O480 | 8.282345518  | -7.764369430  | 0.392885667  |
| S481 | 3.834128465  | 5.541467725   | -2.777691844 |

|                    |                                     |              |              |               |
|--------------------|-------------------------------------|--------------|--------------|---------------|
|                    | S482                                | 2.424847400  | 2.334328420  | -3.838122951  |
|                    | S483                                | 2.292972555  | -2.938745780 | -3.108381282  |
|                    | S484                                | 3.670430959  | 2.543243802  | -0.451845924  |
|                    | S485                                | -0.026235525 | -1.745633789 | -0.919816990  |
|                    | S486                                | 4.327577093  | -0.535190725 | -5.512502129  |
|                    | S487                                | 3.707505305  | -3.173598029 | 0.048571968   |
|                    | S488                                | 5.953533275  | 2.065974330  | -3.078746124  |
|                    | S489                                | 6.011172896  | -2.563951519 | -2.808339799  |
|                    | S490                                | 6.179871691  | -0.272269779 | 0.043405390   |
| <b>20, 35(3/2)</b> | <b>bm2unh2b2n2x6n2n3b2353.car_1</b> |              |              |               |
| Fe1                | 2.90                                | C1           | -7.173157490 | -6.049046227  |
| Fe2                | -0.99                               | C2           | -7.267302160 | -7.252572108  |
| Fe3                | -2.23                               | C3           | -8.389153693 | -4.216431579  |
| Fe4                | 2.85                                | C4           | -7.935199282 | -4.419444572  |
| Fe5                | -2.59                               | C5           | -7.740284741 | -5.928055913  |
| Fe6                | -0.37                               | C6           | -6.216629146 | -6.021546545  |
| Fe7                | 2.02                                | C7           | -4.088597467 | -6.470858688  |
|                    |                                     | C8           | -3.483204505 | -5.067734470  |
|                    |                                     | C9           | -3.662105511 | -2.819748374  |
|                    |                                     | C10          | -3.838442162 | -2.032718833  |
|                    |                                     | C11          | -5.178838259 | -1.611809803  |
|                    |                                     | C12          | -4.281971689 | -2.118368711  |
|                    |                                     | C13          | -3.490105973 | -4.057871644  |
|                    |                                     | C14          | -1.967955996 | -4.218818202  |
|                    |                                     | C15          | -0.069547216 | -4.798487132  |
|                    |                                     | C16          | 0.773153535  | -3.715567067  |
|                    |                                     | C17          | 0.711059137  | -1.511337689  |
|                    |                                     | C18          | 0.594642539  | -0.235847011  |
|                    |                                     | C19          | 0.163950965  | -1.342770134  |
|                    |                                     | C20          | 0.594846777  | -0.000367096  |
|                    |                                     | C21          | 0.599023487  | -2.527001203  |
|                    |                                     | C22          | -0.869702451 | 1.511402243   |
|                    |                                     | C23          | -0.720455579 | 1.289990520   |
|                    |                                     | C24          | -2.215899228 | 2.169436064   |
|                    |                                     | C25          | -2.496128541 | 3.408963187   |
|                    |                                     | C26          | -2.221727636 | 2.543416003   |
|                    |                                     | C27          | -1.259683283 | -0.068875948  |
|                    |                                     | C28          | 0.171960662  | -0.133837196  |
|                    |                                     | C29          | 7.004211454  | -10.545518350 |
|                    |                                     | C30          | 7.450742508  | -9.269556009  |
|                    |                                     | C31          | 7.497593828  | -6.785337336  |
|                    |                                     | C32          | 8.642783415  | -6.230851649  |
|                    |                                     | C33          | 6.233269518  | -5.915288248  |
|                    |                                     | C34          | 6.461877592  | -4.460893330  |
|                    |                                     | C35          | 5.134687009  | -3.723842475  |
|                    |                                     | C36          | 4.903780753  | -1.229495520  |
|                    |                                     | C37          | 10.845846317 | -5.164680977  |
|                    |                                     | C38          | 10.965540009 | -3.658731562  |
|                    |                                     | C39          | -4.940997993 | -3.209987046  |
|                    |                                     | C40          | -5.507359381 | -1.820481874  |
|                    |                                     | C41          | -3.402411268 | -3.139324108  |
|                    |                                     | C42          | -2.663602677 | -4.492789724  |
|                    |                                     | C43          | -2.329274948 | -5.059130344  |
|                    |                                     | C44          | -6.397506409 | 0.236711870   |
|                    |                                     | C45          | -7.722072650 | 0.516956952   |
|                    |                                     | C46          | -6.390175065 | 0.902679996   |
|                    |                                     | C47          | -9.516581753 | -0.378640454  |
|                    |                                     | C48          | -9.081575805 | -0.130381950  |
|                    |                                     | C49          | -7.249368040 | -0.180619548  |
|                    |                                     | C50          | -6.232510154 | 0.938938666   |
|                    |                                     | C51          | -4.865090884 | 2.730046857   |
|                    |                                     |              |              | 1.090972441   |
|                    |                                     |              |              | 0.148598469   |
|                    |                                     |              |              | 2.184885376   |
|                    |                                     |              |              | 3.628959165   |
|                    |                                     |              |              | 5.538588014   |
|                    |                                     |              |              | 5.677760012   |
|                    |                                     |              |              | 4.553644145   |
|                    |                                     |              |              | 4.446145558   |
|                    |                                     |              |              | 3.517854807   |
|                    |                                     |              |              | 4.826379030   |
|                    |                                     |              |              | 6.805782845   |
|                    |                                     |              |              | 7.944628003   |
|                    |                                     |              |              | 9.209422849   |
|                    |                                     |              |              | 9.097944486   |
|                    |                                     |              |              | 7.643884300   |
|                    |                                     |              |              | 6.961638904   |
|                    |                                     |              |              | 5.810913111   |
|                    |                                     |              |              | 6.666347821   |
|                    |                                     |              |              | 4.375557388   |
|                    |                                     |              |              | 3.782832058   |
|                    |                                     |              |              | 3.505959401   |
|                    |                                     |              |              | 7.585343608   |
|                    |                                     |              |              | 9.101288642   |
|                    |                                     |              |              | 7.195835853   |
|                    |                                     |              |              | 8.054939864   |
|                    |                                     |              |              | 5.707841788   |
|                    |                                     |              |              | 11.035392521  |
|                    |                                     |              |              | 11.528469467  |
|                    |                                     |              |              | 4.502601848   |
|                    |                                     |              |              | 3.793451162   |
|                    |                                     |              |              | 4.048254112   |
|                    |                                     |              |              | 4.915704920   |
|                    |                                     |              |              | 4.147187449   |
|                    |                                     |              |              | 3.734925612   |
|                    |                                     |              |              | 3.557864435   |
|                    |                                     |              |              | 3.704918431   |
|                    |                                     |              |              | 4.897761924   |
|                    |                                     |              |              | 4.809537362   |
|                    |                                     |              |              | -1.548348275  |
|                    |                                     |              |              | -1.208750972  |
|                    |                                     |              |              | -1.487328231  |
|                    |                                     |              |              | -1.484778411  |
|                    |                                     |              |              | -2.862544210  |
|                    |                                     |              |              | -2.217407793  |
|                    |                                     |              |              | -1.499146068  |
|                    |                                     |              |              | -3.609372512  |
|                    |                                     |              |              | -0.103089742  |
|                    |                                     |              |              | 1.348890514   |
|                    |                                     |              |              | 2.986711327   |
|                    |                                     |              |              | 3.203734737   |
|                    |                                     |              |              | 2.218644028   |

|      |               |              |              |
|------|---------------|--------------|--------------|
| C52  | -5.461358786  | 4.025827475  | 2.823732323  |
| C53  | -4.289446441  | 3.135549351  | 0.851707037  |
| C54  | -3.546855973  | 2.092977616  | 0.076404965  |
| C55  | -2.823018777  | 0.972334301  | 0.408055027  |
| C56  | -2.684431008  | 1.219971800  | -1.787588753 |
| C57  | -7.482138366  | 5.449984102  | 2.898524253  |
| C58  | -7.501357633  | 5.665973985  | 4.409877758  |
| C59  | -8.918298939  | 5.341487615  | 2.338644242  |
| C60  | -9.643772973  | 6.637082567  | 2.123107916  |
| C61  | -9.677373439  | 7.789478546  | 2.883903963  |
| C62  | -10.958716269 | 8.009597181  | 1.089032256  |
| C63  | 8.890148546   | 2.573279949  | 3.715726251  |
| C64  | 9.964700271   | 1.511392083  | 3.577026479  |
| C65  | 7.530323134   | 1.862212953  | 3.497839399  |
| C66  | 6.348257029   | 2.795077693  | 3.611819797  |
| C67  | 5.740064945   | 3.058314363  | 4.853273715  |
| C68  | 5.812971496   | 3.419238816  | 2.470525486  |
| C69  | 4.631010187   | 3.906889398  | 4.954268004  |
| C70  | 4.715597214   | 4.275669002  | 2.556429672  |
| C71  | 4.121732719   | 4.514132052  | 3.799039126  |
| C72  | 4.934999846   | 7.743120820  | -1.382304474 |
| C73  | 3.718603219   | 8.588136147  | -1.775702915 |
| C74  | 4.521139585   | 6.271050925  | -1.207264315 |
| C75  | 2.516989194   | 9.694439954  | -3.607597035 |
| C76  | 1.162284818   | 8.989380800  | -3.651320093 |
| C77  | -0.088721224  | 6.875933360  | -3.582339018 |
| C78  | -0.695647522  | 6.744658410  | -2.172076140 |
| C79  | 0.143385547   | 5.506182349  | -4.244818403 |
| C80  | -1.061263963  | 4.563788880  | -4.345761190 |
| C81  | -2.170903917  | 4.947348641  | -5.343060868 |
| C82  | -3.676129789  | 6.922939470  | -5.033157144 |
| C83  | -0.328074804  | 6.463297291  | 0.230995925  |
| C84  | -0.550878747  | 7.814500445  | 0.940138246  |
| C85  | 0.565689217   | 5.581439921  | 1.105561725  |
| C86  | 0.322226940   | 10.066717347 | 1.330539069  |
| C87  | -0.511732702  | 11.294497681 | 0.973852806  |
| C88  | -2.204771144  | 12.298949988 | -0.504402782 |
| C89  | -3.539508337  | 12.568317053 | 0.223427465  |
| C90  | -2.429784519  | 12.195766654 | -2.030961697 |
| C91  | -3.267005026  | 10.977235153 | -2.397679100 |
| C92  | -5.298173013  | 11.632706984 | 1.669576890  |
| C93  | -5.356799403  | 12.707685675 | 2.749306757  |
| C94  | -5.632803134  | 10.244788795 | 2.283735324  |
| C95  | -5.757710257  | 9.159098961  | 1.237214507  |
| C96  | -6.967351161  | 8.975228857  | 0.547902657  |
| C97  | -4.669900314  | 8.338348900  | 0.895946289  |
| C98  | -7.088550332  | 8.017070901  | -0.460709586 |
| C99  | -4.765304175  | 7.389814686  | -0.128047509 |
| C100 | -5.977434636  | 7.245745597  | -0.800774177 |
| C101 | 4.661184492   | -3.648322334 | -8.843109383 |
| C102 | 3.218850511   | -3.588214622 | -8.369341227 |
| C103 | 1.593378607   | -2.228212500 | -7.063511640 |
| C104 | 0.959445490   | -0.947013305 | -7.617473731 |
| C105 | 1.067267177   | 1.496155048  | -7.659742299 |
| C106 | 2.095861195   | 2.605098402  | -7.858783363 |
| C107 | 4.333352356   | 3.501327875  | -7.463980236 |
| C108 | 5.186906520   | 3.504375798  | -8.716441809 |
| C109 | -2.155040526  | -3.950673635 | -9.092152144 |
| C110 | -3.299607196  | -2.963113613 | -8.828374094 |
| C111 | -1.657093075  | -4.541291492 | -7.752639634 |
| C112 | -0.804470508  | -5.803253834 | -7.985649634 |
| C113 | -0.077346835  | -6.204292301 | -6.721925606 |

|       |              |              |              |
|-------|--------------|--------------|--------------|
| C114  | -3.950403209 | -0.676172249 | -8.236227624 |
| C115  | -3.622153040 | 0.637993674  | -8.919875534 |
| C116  | -4.249390594 | -0.555743509 | -6.719561896 |
| C117  | -3.011485479 | -0.532186465 | -5.855720269 |
| C118  | -2.290565362 | 0.654927074  | -5.630639657 |
| C119  | -2.518393993 | -1.725297699 | -5.299923417 |
| C120  | -1.106345746 | 0.638615986  | -4.882850121 |
| C121  | -1.333264602 | -1.741764751 | -4.556893226 |
| C122  | -0.616598002 | -0.558479390 | -4.350353072 |
| C123  | 8.551683579  | -5.397219470 | -4.399163869 |
| C124  | 9.711323235  | -5.335290651 | -3.388725336 |
| C125  | 7.262824703  | -5.931930770 | -3.751684316 |
| C126  | 6.018379308  | -5.840239531 | -4.582101206 |
| C127  | 5.761297921  | -6.447905801 | -5.794576046 |
| C128  | 3.927858480  | -5.425201699 | -5.083690579 |
| C129  | 11.088888986 | -6.441963254 | -1.717430281 |
| C130  | 12.386820728 | -5.995789147 | -2.354741365 |
| C131  | 1.332667989  | -7.105875960 | 0.093390693  |
| C132  | 2.724115461  | -6.589656825 | 0.337687742  |
| C133  | 3.670601962  | -6.714085007 | -0.921802740 |
| C134  | 3.718623050  | -8.193454168 | -1.393661282 |
| C135  | 4.734555319  | -8.407370041 | -2.526504047 |
| C136  | 5.017709810  | -9.851722681 | -2.829499140 |
| C137  | 5.102193069  | -6.340366922 | -0.425576778 |
| C138  | 3.723494147  | -0.300176575 | -2.152649168 |
| Fe139 | 4.040363466  | -1.673872574 | -3.577421599 |
| Fe140 | 2.460669969  | 1.268210268  | -1.867084500 |
| Fe141 | 5.008812879  | 1.000314603  | -1.390534715 |
| Fe142 | 4.131341570  | 0.855982525  | -3.814100929 |
| Fe143 | 4.056799921  | 3.262998847  | -2.497465032 |
| Fe144 | 4.864369818  | -1.580314931 | -1.168282057 |
| Fe145 | 2.273515374  | -1.302784598 | -1.296658258 |
| H146  | -5.332529611 | -7.864415024 | 0.351210164  |
| H147  | -5.608761661 | -7.030431745 | -1.025588878 |
| H148  | -9.182701681 | -5.680148165 | 0.843397055  |
| H149  | -7.964112367 | -7.019078912 | -0.671985448 |
| H150  | -7.743534832 | -8.062603115 | 0.728486247  |
| H151  | -7.741526808 | -3.432089247 | 1.767941514  |
| H152  | -8.667223654 | -6.338864995 | 3.638814709  |
| H153  | -9.422087583 | -3.843818372 | 2.195383834  |
| H154  | -8.184855241 | -6.882102028 | 5.851655547  |
| H155  | -6.043688236 | -6.576590273 | 3.708959540  |
| H156  | -8.075554414 | -5.148394279 | 6.234579087  |
| H157  | -2.594056204 | -2.777724875 | 3.265914546  |
| H158  | -4.877240066 | -4.526303571 | 3.017974619  |
| H159  | -3.760166533 | -7.077053315 | 3.698099297  |
| H160  | -4.984661120 | -0.538031564 | 6.693766741  |
| H161  | -5.691374005 | -2.895821406 | 5.154591507  |
| H162  | -3.690866166 | -6.923214312 | 5.470210742  |
| H163  | -4.225972436 | -2.329973794 | 2.710944794  |
| H164  | -4.711364920 | -4.084566590 | 7.455777138  |
| H165  | -6.229977704 | -1.751686391 | 7.095456093  |
| H166  | 0.307762611  | -3.484591517 | 3.963151437  |
| H167  | 0.126785075  | -2.475020502 | 2.512977988  |
| H168  | 1.689713098  | -2.529705852 | 3.353385243  |
| H169  | -0.935236513 | -1.351380046 | 4.441067238  |
| H170  | -3.919092633 | -5.055872881 | 9.382524780  |
| H171  | -2.092811413 | 1.668496427  | 5.055438444  |
| H172  | -1.981033478 | -0.365128884 | 9.051473751  |
| H173  | -2.579514159 | 3.167909488  | 9.124051894  |
| H174  | 0.210337982  | 0.107973648  | 2.759800546  |
| H175  | 1.688365544  | 0.079292646  | 3.723014973  |

|      |               |              |               |
|------|---------------|--------------|---------------|
| H176 | 8.917471533   | 2.942395032  | 4.759041930   |
| H177 | -3.175499547  | 3.020350642  | 5.439174983   |
| H178 | -3.439658065  | 3.875889927  | 7.735343176   |
| H179 | -1.410323374  | 3.257306764  | 5.490563615   |
| H180 | -1.691746380  | 4.152179310  | 7.936766282   |
| H181 | -3.019291512  | 1.433098858  | 7.378506236   |
| H182 | -0.051454782  | 2.201385255  | 7.327047778   |
| H183 | -1.456243002  | -0.163726344 | 6.368134859   |
| H184 | 0.218330861   | 0.847722583  | 4.372601183   |
| H185 | 0.712186126   | 4.611409613  | 0.598365259   |
| H186 | 0.028739784   | 5.407706112  | 2.051744689   |
| H187 | 2.183840981   | 5.901441111  | 2.171966240   |
| H188 | 2.676808957   | 5.417452274  | 4.732643376   |
| H189 | 4.297558465   | 4.730682306  | 1.657725662   |
| H190 | 6.239957296   | 3.207036969  | 1.487560024   |
| H191 | 6.128151607   | 2.585260962  | 5.759781777   |
| H192 | -0.923112444  | -2.645543068 | 6.610229047   |
| H193 | 0.020638166   | -5.709986216 | 7.035085804   |
| H194 | 0.391145952   | -4.994295663 | 8.621344940   |
| H195 | -2.111737607  | -4.636112976 | 7.066800697   |
| H196 | -3.670356308  | -3.445571900 | 10.101970827  |
| H197 | 4.159266857   | 4.085470242  | 5.924646174   |
| H198 | 1.785089717   | -1.735706509 | 5.773749887   |
| H199 | -1.807812664  | 0.671903565  | 11.640580698  |
| H200 | -1.710741896  | -1.057592402 | 11.217171254  |
| H201 | 0.921625755   | -0.448221119 | 10.764495949  |
| H202 | 11.772426788  | -5.627032961 | 4.524096246   |
| H203 | -0.896862506  | -6.132429792 | -3.858839849  |
| H204 | 1.889174400   | -8.763030962 | 0.906361572   |
| H205 | -1.459343200  | -6.634451194 | -8.285041298  |
| H206 | -0.081925995  | -5.626184264 | -8.796033338  |
| H207 | -2.510479556  | -4.800832959 | -7.107290388  |
| H208 | -3.094284399  | 0.525348767  | -9.896633870  |
| H209 | -2.642307548  | -4.764090757 | -9.651443608  |
| H210 | -3.042307560  | -2.518501924 | -2.322200584  |
| H211 | -3.265391687  | -5.253827868 | -0.956814374  |
| H212 | -1.955623846  | -1.422148451 | -8.484292999  |
| H213 | -4.882410983  | -1.016970213 | -8.728853067  |
| H214 | -0.527174250  | -2.718432860 | -9.465485772  |
| H215 | -0.513176892  | -5.798118268 | -2.170803445  |
| H216 | -1.077706723  | -3.771137338 | -7.220472728  |
| H217 | -0.528497764  | -4.119210874 | -10.333024816 |
| H218 | -6.243501311  | -4.253677218 | -2.768753099  |
| H219 | -3.131652432  | -2.612912078 | -0.561601838  |
| H220 | 1.529123055   | -5.302474894 | -7.427903341  |
| H221 | -1.732061651  | -4.375912066 | -0.913294046  |
| H222 | -4.065137828  | 2.411861450  | 2.902228656   |
| H223 | -2.637492044  | 0.508002216  | 1.370346079   |
| H224 | -8.101041632  | 0.027290747  | 3.648048189   |
| H225 | -7.129997749  | -0.729574338 | 0.926619962   |
| H226 | -7.318035920  | 3.426789429  | 2.202355349   |
| H227 | -9.181978747  | 8.074824744  | 3.805667182   |
| H228 | -7.625577117  | 4.722900102  | 4.997354829   |
| H229 | -9.507230533  | 4.662465565  | 2.980851843   |
| H230 | -6.951204928  | 6.292176286  | 2.428675629   |
| H231 | -11.637065109 | 8.471178686  | 0.375586385   |
| H232 | -3.618096917  | 3.989975368  | 1.033382313   |
| H233 | -5.113330189  | 3.515842869  | 0.226051260   |
| H234 | -10.757795014 | 9.595664052  | 2.493774349   |
| H235 | -8.851990006  | 4.851788711  | 1.354278218   |
| H236 | -6.157228298  | 1.349635201  | 1.183817402   |
| H237 | -6.795062615  | -1.118512717 | 3.339664765   |



|      |               |              |               |
|------|---------------|--------------|---------------|
| H238 | -10.139048617 | 0.475218971  | -0.400726013  |
| H239 | -2.403188734  | 1.066291743  | -2.826748595  |
| H240 | -10.147221367 | -1.277303853 | -0.126216456  |
| H241 | 9.885797879   | 4.206210738  | 2.980072982   |
| H242 | 8.284265029   | 4.209650215  | 2.644938197   |
| H243 | 1.168314284   | 6.457932564  | -1.316640131  |
| H244 | -1.317649151  | 5.988104786  | 0.179078550   |
| H245 | 0.946576501   | 8.700317774  | -0.157014076  |
| H246 | -3.868228241  | 2.995346824  | -1.861637615  |
| H247 | -5.469525399  | 3.573371339  | -3.146185814  |
| H248 | -5.268111173  | 4.879059002  | -2.256094037  |
| H249 | -5.403620410  | 0.760527482  | -4.071944257  |
| H250 | -7.150388215  | 0.430952070  | -4.254784352  |
| H251 | -1.447093501  | 12.176373984 | -2.524588570  |
| H252 | -2.967808846  | 13.097640770 | -2.349573985  |
| H253 | -1.570891113  | 9.875344862  | -2.996716981  |
| H254 | -3.077595743  | 9.003346264  | -2.895273197  |
| H255 | -3.475051160  | 8.552702906  | -6.252010339  |
| H256 | -2.599290184  | 4.038273279  | -5.790467875  |
| H257 | -8.041562407  | 7.873266984  | -0.975589181  |
| H258 | -3.722354670  | 8.415807798  | 1.437157139   |
| H259 | -4.994069578  | 7.072067804  | -3.448899114  |
| H260 | 0.940080441   | 4.977997763  | -3.696405274  |
| H261 | 2.043082698   | 7.121823525  | -3.453865763  |
| H262 | -1.503476909  | 4.382980487  | -3.353379247  |
| H263 | -8.081909731  | -1.469832932 | -1.274619823  |
| H264 | 2.759100429   | 10.017452258 | -4.629110616  |
| H265 | -5.981441938  | -1.719426640 | -3.148574212  |
| H266 | 0.539700290   | 5.694501259  | -5.256423887  |
| H267 | -3.896823595  | 6.795034474  | -0.417782737  |
| H268 | -7.310144162  | 2.411419371  | -2.787264411  |
| H269 | 2.370539096   | 10.595253040 | -2.995752658  |
| H270 | -2.707513699  | 7.123598757  | -6.838016589  |
| H271 | -5.114897304  | 8.321004841  | -4.638025219  |
| H272 | -4.677555988  | -4.172347914 | -3.348499970  |
| H273 | -5.277640281  | -3.866211918 | -0.723496920  |
| H274 | -7.837265110  | 9.583216407  | 0.807143790   |
| H275 | -5.651015061  | 0.758160050  | -1.594704333  |
| H276 | -0.824683324  | 7.458979649  | -4.153215671  |
| H277 | -1.744536953  | 5.526722733  | -6.171544351  |
| H278 | -0.651292885  | 3.599150642  | -4.674864385  |
| H279 | -3.816340542  | 5.183508056  | -4.002217383  |
| H280 | 0.064867873   | 9.807976628  | 2.368649036   |
| H281 | -1.469623894  | 10.274417741 | -0.531077204  |
| H282 | -1.589430106  | 13.189459343 | -0.310385374  |
| H283 | 1.373774016   | 10.383734546 | 1.314453649   |
| H284 | -3.426939212  | 10.738397807 | 1.113825891   |
| H285 | 5.034507288   | -2.630641686 | -9.030065673  |
| H286 | 5.244349495   | -4.047786083 | -7.987519095  |
| H287 | 8.387443538   | -4.354450713 | -4.708106374  |
| H288 | 5.749013232   | -4.678592080 | -10.226232792 |
| H289 | 4.277434863   | -5.332276925 | -9.920629604  |
| H290 | 5.417389577   | 5.703672100  | -0.928060323  |
| H291 | 4.828583587   | 8.348411498  | 0.559914052   |
| H292 | 4.306845425   | 8.530799477  | -3.739851393  |
| H293 | 3.784619234   | 6.193040747  | -0.394010639  |
| H294 | 5.951664054   | 9.157854136  | -0.306185136  |
| H295 | 4.993613963   | 3.438552419  | -6.584793662  |
| H296 | 5.685799515   | 7.796003709  | -2.186082846  |
| H297 | 5.848500140   | -5.964878109 | 5.179303395   |
| H298 | 7.817095457   | -6.838994653 | 3.000607995   |
| H299 | 3.621145535   | 1.582966778  | -6.882563124  |

|      |              |               |              |
|------|--------------|---------------|--------------|
| H300 | 4.758260899  | 0.805497133   | 3.495136046  |
| H301 | 0.564327088  | 1.342454710   | -8.623117840 |
| H302 | -0.964118314 | -2.679726225  | -4.136317796 |
| H303 | 0.308569503  | 1.905107174   | -6.972343342 |
| H304 | 4.549378269  | -3.722204476  | 4.486767810  |
| H305 | 2.238876228  | 0.125303834   | -6.440587591 |
| H306 | 4.519827442  | -4.236306748  | 2.799882855  |
| H307 | 5.478380493  | -6.377238450  | 3.490184333  |
| H308 | 7.003714344  | -4.418168685  | 2.777863012  |
| H309 | 7.076596069  | -3.936391151  | 4.484296678  |
| H310 | -4.875437022 | -1.415045966  | -6.438846883 |
| H311 | 6.792690769  | -8.297277798  | 5.411898803  |
| H312 | 6.122747631  | -10.907058423 | 3.951673447  |
| H313 | 0.309575305  | -0.562768890  | -3.770241000 |
| H314 | 7.461816745  | -10.459209113 | 6.508651926  |
| H315 | 5.959023689  | -11.035541965 | 6.206833399  |
| H316 | 5.669540245  | -2.234390529  | 2.141119020  |
| H317 | -0.537454940 | 1.555753562   | -4.715281638 |
| H318 | -3.069690249 | -2.657277369  | -5.442062729 |
| H319 | 8.684774547  | -8.963086295  | -1.017381054 |
| H320 | 7.422429454  | -6.992419297  | -3.485545727 |
| H321 | 7.347504662  | -7.410361494  | 0.334772281  |
| H322 | 8.040475078  | -9.801070414  | -2.144674297 |
| H323 | 4.933029899  | 2.719772350   | -9.469804806 |
| H324 | 6.890277383  | -4.354264952  | -0.056506340 |
| H325 | 3.196429836  | -7.104639731  | 1.187334312  |
| H326 | 3.629792763  | -1.823730025  | -7.412365063 |
| H327 | 3.996024470  | -8.821215256  | -0.532042388 |
| H328 | 3.926013779  | -6.503473807  | -6.901190689 |
| H329 | 2.898827439  | -5.089839681  | -5.048998801 |
| H330 | 7.804129774  | -11.288579345 | 4.342239350  |
| H331 | 5.195715538  | -0.066418024  | 2.023847773  |
| H332 | 8.965755620  | -4.799138781  | 1.041893813  |
| H333 | 7.503534698  | -2.929483351  | -0.003144257 |
| H334 | 9.640080032  | -5.655475175  | 3.179862749  |
| H335 | 4.705069474  | -2.014290845  | 5.596548046  |
| H336 | 4.182711124  | -11.471192192 | -3.343098720 |
| H337 | 4.360127759  | -7.923879951  | -3.441420082 |
| H338 | 5.697461196  | -7.948875243  | -2.275315785 |
| H339 | 2.717299595  | -8.491994436  | -1.735435139 |
| H340 | 1.730548572  | -2.159475896  | -5.971899233 |
| H341 | -2.654999760 | 1.590976273   | -6.062640999 |
| H342 | -4.846569139 | 0.358620160   | -6.581913361 |
| H343 | 2.654618859  | -5.518279847  | 0.565294305  |
| H344 | 9.203596240  | -6.331827646  | 0.981725273  |
| H345 | 8.233529918  | -8.329506208  | 1.212143743  |
| H346 | 4.174672226  | -0.390011787  | 5.426005705  |
| H347 | 6.396019408  | -7.039331150  | -6.442697124 |
| H348 | 7.091879158  | -5.401976705  | -2.807018512 |
| H349 | 0.926430462  | -3.062531176  | -7.291398325 |
| H350 | 3.805985526  | 4.467407041   | -7.412844750 |
| H351 | 7.452475671  | 1.058211479   | 4.244952206  |
| H352 | 7.535621211  | 1.391913115   | 2.501605164  |
| H353 | 9.734114066  | -5.735411163  | -6.041048933 |
| H354 | 9.203204018  | -7.112691229  | -5.337049002 |
| H355 | 11.239334543 | -7.474442476  | -1.364390343 |
| H356 | 9.405390601  | -7.296103765  | -2.700327747 |
| H357 | 12.453359277 | -6.169768153  | -3.455585286 |
| H358 | 10.873747844 | -5.816551146  | -0.836197927 |
| H359 | 10.255732183 | 1.293560673   | 2.520846482  |
| H360 | -4.370474566 | 13.021606131  | 3.165287166  |
| H361 | 10.748531088 | -5.415968530  | 5.968587935  |

|       |               |               |               |
|-------|---------------|---------------|---------------|
| H362  | 10.005727399  | -3.112749127  | 4.639128975   |
| H363  | -6.059777558  | 11.885232165  | 0.914800457   |
| H364  | -4.854907725  | 9.983096118   | 3.017988267   |
| H365  | -6.578433582  | 10.353360150  | 2.834186247   |
| H366  | -6.966179958  | 6.271890687   | -2.166961681  |
| H367  | -0.047982717  | -1.429608469  | 0.405212825   |
| H368  | 2.366759716   | -2.891525993  | -0.075436089  |
| H369  | -1.572116933  | -0.324189913  | -0.856008514  |
| Mo370 | 4.252820191   | -4.048357599  | -2.216568330  |
| N371  | 2.351619394   | 0.069080075   | 1.273079338   |
| N372  | 2.307362421   | -0.405751665  | 0.246865633   |
| N373  | -6.012620238  | -7.733632771  | -0.402254792  |
| N374  | -8.348854319  | -5.416454040  | 1.362600050   |
| N375  | -8.187757657  | -5.628804335  | 4.187219244   |
| N376  | -5.543401532  | -6.474380125  | 4.590996189   |
| N377  | -4.111552810  | -4.201731690  | 3.610487853   |
| N378  | -4.960068260  | -2.294170902  | 5.540807754   |
| N379  | -4.171708279  | -3.466684797  | 8.067815618   |
| N380  | -1.474858120  | -4.491485108  | 7.856286879   |
| N381  | 0.088978803   | -2.639166195  | 6.498834950   |
| N382  | -0.660991696  | 0.266153695   | 6.844079281   |
| N383  | -1.338773292  | 0.196757431   | 9.613443871   |
| N384  | 6.641986536   | -10.337316126 | 5.909899155   |
| N385  | 7.194754968   | -8.141133017  | 4.481066503   |
| N386  | 5.333605200   | -2.346608158  | 3.100961930   |
| N387  | 4.430808933   | -1.262066699  | 4.972927742   |
| N388  | 4.905628624   | -0.082144714  | 3.024366183   |
| N389  | 9.677749289   | -5.695710249  | 4.220965922   |
| N390  | -5.427545872  | -3.645310204  | -2.863657708  |
| N391  | -1.159157115  | -5.720039675  | -2.958517919  |
| N392  | -6.021115054  | -1.159547744  | -2.280518899  |
| N393  | -8.424739906  | -0.539805702  | -1.045373257  |
| N394  | -7.763108977  | -0.342443214  | 1.637248692   |
| N395  | -5.845145946  | 1.656122198   | 2.101824726   |
| N396  | -3.444342843  | 2.215870807   | -1.303583209  |
| N397  | -2.316756898  | 0.445986614   | -0.764374937  |
| N398  | -6.789534191  | 4.200772197   | 2.597873239   |
| N399  | -10.447580855 | 6.787146387   | 1.005116558   |
| N400  | -10.515712631 | 8.650925041   | 2.206969490   |
| N401  | 9.107967298   | 3.604087864   | 2.699520171   |
| N402  | 5.564071042   | 8.223458589   | -0.143733547  |
| N403  | 3.625578631   | 8.918199682   | -3.092188530  |
| N404  | 1.157854532   | 7.637889856   | -3.594913628  |
| N405  | -3.287614029  | 5.685196584   | -4.738947061  |
| N406  | -3.145940283  | 7.611167012   | -6.064658880  |
| N407  | -4.571528881  | 7.558297260   | -4.242205852  |
| N408  | 0.170330841   | 6.581305068   | -1.134910407  |
| N409  | 0.179504767   | 8.879112444   | 0.498676617   |
| N410  | -1.461940440  | 11.145968865  | 0.001522073   |
| N411  | -2.556147094  | 9.858654380   | -2.707363375  |
| N412  | -3.985284201  | 11.585350471  | 1.043167775   |
| N413  | 4.766114569   | -4.444653404  | -10.069369896 |
| N414  | 2.884278407   | -2.474716950  | -7.693024243  |
| N415  | 1.534414728   | 0.200895908   | -7.195729637  |
| N416  | 3.366931048   | 2.417299340   | -7.420424310  |
| N417  | -1.131117586  | -3.376263865  | -9.973049467  |
| N418  | -2.946398324  | -1.671447500  | -8.574458464  |
| N419  | 8.914372149   | -6.166477918  | -5.604200438  |
| N420  | 4.855539870   | -5.196019540  | -4.158613392  |
| N421  | 4.441743054   | -6.174779075  | -6.088918710  |
| N422  | 9.990498192   | -6.459871646  | -2.670401600  |
| N423  | -0.068836250  | 2.365416084   | -0.912542259  |

|      |              |               |              |
|------|--------------|---------------|--------------|
| N424 | 0.866372973  | 1.852276689   | -1.307428542 |
| O425 | -6.105808888 | -5.702865116  | 1.631462165  |
| O426 | -7.376481462 | -3.500786863  | 4.249814623  |
| O427 | -5.657934996 | -5.720148613  | 6.745744667  |
| O428 | -2.480064721 | -4.743381856  | 5.100790508  |
| O429 | -2.994624371 | -1.202079726  | 5.196261729  |
| O430 | -3.728272211 | -1.324852242  | 8.724220386  |
| O431 | -1.266206999 | -4.141692637  | 10.114882736 |
| O432 | 1.997641934  | -3.872242217  | 6.848593921  |
| O433 | 1.601120517  | 0.302404059   | 7.151950682  |
| O434 | -0.063535141 | 2.065076305   | 9.815681852  |
| O435 | 0.488982331  | 0.072505141   | 12.690397471 |
| O436 | 7.979083471  | -9.337949861  | 2.663764397  |
| O437 | 8.590481458  | -6.290962647  | 6.156786260  |
| O438 | 12.024221916 | -3.064048823  | 4.937176478  |
| O439 | -5.498154548 | -1.345397991  | -0.053967879 |
| O440 | -3.101528626 | -4.935253306  | -3.841148903 |
| O441 | -8.071805388 | 1.702505346   | -1.310410473 |
| O442 | -6.633808515 | 2.314334583   | -3.508161716 |
| O443 | -9.922710175 | 0.231301925   | 2.179271455  |
| O444 | -5.807168557 | 1.179611839   | 4.336237300  |
| O445 | -4.742098969 | 4.866517479   | 3.370882870  |
| O446 | -7.420219335 | 6.752930763   | 4.953810900  |
| O447 | 10.468796781 | 0.913181985   | 4.516732958  |
| O448 | 3.023833350  | 5.352159795   | 3.824037149  |
| O449 | 2.864875195  | 8.951959158   | -0.944901359 |
| O450 | 0.132125170  | 9.683284633   | -3.769547995 |
| O451 | -1.927528554 | 6.783595694   | -2.017310682 |
| O452 | -1.344399737 | 7.881629686   | 1.889836855  |
| O453 | 1.812885223  | 6.243125921   | 1.332263653  |
| O454 | -0.330708537 | 12.357389996  | 1.580839725  |
| O455 | -4.147429526 | 13.634277633  | 0.053154233  |
| O456 | -4.505655043 | 10.987485937  | -2.325020707 |
| O457 | -6.405452956 | 13.176602305  | 3.159562780  |
| O458 | -6.041266522 | 6.318703068   | -1.856400826 |
| O459 | 2.434684571  | -4.549409251  | -8.581272296 |
| O460 | 0.005403774  | -0.982514395  | -8.424029971 |
| O461 | 1.716055754  | 3.660421835   | -8.393386891 |
| O462 | 6.092100686  | 4.301753031   | -8.901445798 |
| O463 | -4.483107497 | -3.340773863  | -8.826336881 |
| O464 | -0.603636164 | -6.822268689  | -5.801886950 |
| O465 | 1.205875624  | -5.804635312  | -6.613643348 |
| O466 | -3.933987580 | 1.739587031   | -8.490581490 |
| O467 | 10.423699987 | -4.320858225  | -3.277925862 |
| O468 | 13.332341718 | -5.549644255  | -1.720448162 |
| O469 | 0.421981626  | -6.484140235  | -0.431746524 |
| O470 | 1.083935386  | -8.393981930  | 0.495860587  |
| O471 | 6.124457727  | -10.384960896 | -2.795749264 |
| O472 | 3.901450219  | -10.548023781 | -3.166168685 |
| O473 | 5.635644251  | -5.307288201  | -0.998485325 |
| O474 | 5.675884717  | -7.044948594  | 0.434796606  |
| O475 | 3.255858155  | -5.867780940  | -1.931112000 |
| O476 | 9.586365365  | -5.498911185  | 1.367009857  |
| O477 | 7.501193123  | -3.782349370  | 0.473444097  |
| O478 | -4.785392418 | 4.206537112   | -2.793649578 |
| O479 | 8.914574280  | -9.512724439  | -1.809066623 |
| O480 | 8.279519996  | -7.765775363  | 0.396774943  |
| S481 | 3.790107873  | 5.537183088   | -2.747506644 |
| S482 | 2.413700558  | 2.345408082   | -3.837587014 |
| S483 | 2.280896157  | -2.977489506  | -3.091986722 |
| S484 | 3.661406831  | 2.523890541   | -0.447190257 |
| S485 | -0.014089928 | -1.746218407  | -0.918201260 |

|                  |                                       |             |              |               |
|------------------|---------------------------------------|-------------|--------------|---------------|
|                  | S486                                  | 4.341670311 | -0.554124350 | -5.507523228  |
|                  | S487                                  | 3.740576598 | -3.173703545 | 0.035772143   |
|                  | S488                                  | 5.944053044 | 2.089236421  | -3.096703883  |
|                  | S489                                  | 5.990628628 | -2.563086073 | -2.833035216  |
|                  | S490                                  | 6.175548362 | -0.263237950 | 0.025641934   |
| <b>21, 47(1)</b> | <b>bm1unh2b2n2x2n2n263b2471.car_1</b> |             |              |               |
| Fe1              | 3.22                                  | C1          | -7.423582298 | -5.841805261  |
| Fe2              | -0.15                                 | C2          | -7.452945075 | -6.957706467  |
| Fe3              | 2.69                                  | C3          | -8.700017641 | -4.030239781  |
| Fe4              | -2.81                                 | C4          | -8.439108852 | -4.364404602  |
| Fe5              | 2.04                                  | C5          | -8.520619063 | -6.029745450  |
| Fe6              | -1.88                                 | C6          | -7.028057889 | -6.166737575  |
| Fe7              | -2.35                                 | C7          | -4.784310020 | -6.592672826  |
|                  |                                       | C8          | -4.138368346 | -5.203487606  |
|                  |                                       | C9          | -4.151147300 | -2.897493184  |
|                  |                                       | C10         | -4.449597230 | -2.212454403  |
|                  |                                       | C11         | -5.998721586 | -1.864412292  |
|                  |                                       | C12         | -5.259142466 | -2.481513177  |
|                  |                                       | C13         | -4.655918750 | -4.536218874  |
|                  |                                       | C14         | -3.134250533 | -4.720950095  |
|                  |                                       | C15         | -1.078042420 | -5.221520736  |
|                  |                                       | C16         | -0.146366653 | -4.111831026  |
|                  |                                       | C17         | -0.044819334 | -1.837173196  |
|                  |                                       | C18         | -0.253687297 | -0.636318675  |
|                  |                                       | C19         | -0.405009846 | -1.547725437  |
|                  |                                       | C20         | 0.113370875  | -0.173161188  |
|                  |                                       | C21         | 0.113327159  | -2.675900892  |
|                  |                                       | C22         | -1.779865088 | 1.077807581   |
|                  |                                       | C23         | -1.786804841 | 0.724006574   |
|                  |                                       | C24         | -3.078559868 | 1.781193878   |
|                  |                                       | C25         | -3.405058467 | 2.978758004   |
|                  |                                       | C26         | -2.970716850 | 2.232392976   |
|                  |                                       | C27         | -2.558776759 | -0.778143192  |
|                  |                                       | C28         | -1.198192745 | -0.893390908  |
|                  |                                       | C29         | 6.082421001  | -11.056077985 |
|                  |                                       | C30         | 6.645886281  | -9.755983302  |
|                  |                                       | C31         | 6.756716409  | -7.296153020  |
|                  |                                       | C32         | 7.809177145  | -6.828055784  |
|                  |                                       | C33         | 5.506375472  | -6.401241499  |
|                  |                                       | C34         | 5.801319342  | -4.931357133  |
|                  |                                       | C35         | 4.517959767  | -4.170304646  |
|                  |                                       | C36         | 4.400605116  | -1.679195433  |
|                  |                                       | C37         | 10.042645889 | -5.860708574  |
|                  |                                       | C38         | 10.158556746 | -4.352985502  |
|                  |                                       | C39         | -4.821384848 | -2.896135879  |
|                  |                                       | C40         | -5.374777468 | -1.526493376  |
|                  |                                       | C41         | -3.303908514 | -2.924564544  |
|                  |                                       | C42         | -2.645688169 | -4.319834964  |
|                  |                                       | C43         | -2.149471145 | -4.796543751  |
|                  |                                       | C44         | -5.949298095 | 0.728078705   |
|                  |                                       | C45         | -7.241110176 | 0.996319262   |
|                  |                                       | C46         | -5.931035996 | 1.404826813   |
|                  |                                       | C47         | -9.387171475 | 0.087078827   |
|                  |                                       | C48         | -9.154615884 | 0.119158601   |
|                  |                                       | C49         | -7.561875367 | -0.170843442  |
|                  |                                       | C50         | -6.536835024 | 0.899120237   |
|                  |                                       | C51         | -5.053603371 | 2.722414917   |
|                  |                                       | C52         | -5.692732054 | 3.976831782   |
|                  |                                       | C53         | -4.290369377 | 3.195665012   |
|                  |                                       | C54         | -3.468678027 | 2.183502725   |
|                  |                                       | C55         | -2.839338149 | 1.025467673   |

|      |               |              |              |
|------|---------------|--------------|--------------|
| C56  | -2.426613882  | 1.383733483  | -1.948837194 |
| C57  | -7.626085985  | 5.502594150  | 2.329602931  |
| C58  | -7.746123859  | 5.614181062  | 3.846766123  |
| C59  | -9.026204738  | 5.488742250  | 1.668266312  |
| C60  | -9.677248882  | 6.828770953  | 1.481410856  |
| C61  | -9.788935086  | 7.904409743  | 2.341771617  |
| C62  | -10.776928818 | 8.354495585  | 0.410192913  |
| C63  | 8.484457887   | 2.036533779  | 4.832790638  |
| C64  | 9.521705087   | 0.934935487  | 4.727889433  |
| C65  | 7.129385634   | 1.416106759  | 4.406681843  |
| C66  | 5.980999337   | 2.392579846  | 4.487690249  |
| C67  | 5.235941694   | 2.555565038  | 5.671192035  |
| C68  | 5.617866119   | 3.161804089  | 3.370065853  |
| C69  | 4.161712691   | 3.451045067  | 5.735675362  |
| C70  | 4.559980891   | 4.069353722  | 3.423049562  |
| C71  | 3.828955466   | 4.209032972  | 4.606356968  |
| C72  | 5.234936113   | 7.655870449  | -0.257673136 |
| C73  | 4.106681878   | 8.572974555  | -0.746159515 |
| C74  | 4.765340769   | 6.191749448  | -0.236090054 |
| C75  | 3.167413025   | 9.813011501  | -2.644221595 |
| C76  | 1.799845953   | 9.165444454  | -2.862109262 |
| C77  | 0.489866021   | 7.091483121  | -3.057021531 |
| C78  | -0.260257953  | 6.904580709  | -1.722835130 |
| C79  | 0.760298985   | 5.755659865  | -3.774584732 |
| C80  | -0.438185420  | 4.838874372  | -4.048694213 |
| C81  | -1.442310770  | 5.283980091  | -5.129071274 |
| C82  | -2.904911732  | 7.288216174  | -4.827783992 |
| C83  | -0.150559434  | 6.472499917  | 0.684360016  |
| C84  | -0.429781075  | 7.785018977  | 1.442093287  |
| C85  | 0.647912052   | 5.538432762  | 1.599886890  |
| C86  | 0.445882914   | 9.987266345  | 2.047729626  |
| C87  | -0.339113255  | 11.248011179 | 1.694086431  |
| C88  | -1.843662199  | 12.372062897 | 0.101064829  |
| C89  | -3.250112952  | 12.613477735 | 0.688681883  |
| C90  | -1.895802192  | 12.361890884 | -1.444642934 |
| C91  | -2.710065305  | 11.183040150 | -1.966824188 |
| C92  | -5.174852255  | 11.625027914 | 1.851370717  |
| C93  | -5.336807377  | 12.628677566 | 2.987176116  |
| C94  | -5.619870098  | 10.211812744 | 2.316803358  |
| C95  | -5.632915844  | 9.198598932  | 1.193717277  |
| C96  | -6.748864228  | 9.090203298  | 0.348800855  |
| C97  | -4.528217500  | 8.368242787  | 0.938736033  |
| C98  | -6.764144045  | 8.193484668  | -0.723219750 |
| C99  | -4.515438169  | 7.482796536  | -0.144366255 |
| C100 | -5.637867697  | 7.404384136  | -0.967574510 |
| C101 | 5.576099449   | -3.229886131 | -8.499481350 |
| C102 | 4.091633409   | -3.118903399 | -8.193005790 |
| C103 | 2.373251893   | -1.761048128 | -7.019457926 |
| C104 | 1.843431476   | -0.433222021 | -7.564468652 |
| C105 | 1.964809344   | 2.005102395  | -7.366134874 |
| C106 | 3.028405661   | 3.098129679  | -7.324142620 |
| C107 | 5.255086155   | 3.845368940  | -6.650292668 |
| C108 | 6.253214121   | 3.913632458  | -7.788128906 |
| C109 | -1.154039792  | -3.245127072 | -9.582843132 |
| C110 | -2.291364766  | -2.233334674 | -9.387116608 |
| C111 | -0.840094622  | -3.941079798 | -8.237199657 |
| C112 | 0.004146473   | -5.211418221 | -8.454962363 |
| C113 | 0.542227098   | -5.734472923 | -7.142534427 |
| C114 | -2.943730298  | 0.028289570  | -8.710299387 |
| C115 | -2.477044832  | 1.372534638  | -9.235615679 |
| C116 | -3.452665926  | 0.045852009  | -7.246854548 |
| C117 | -2.340552823  | -0.046521951 | -6.233049329 |

|       |              |              |              |
|-------|--------------|--------------|--------------|
| C118  | -1.614952123 | 1.092937914  | -5.848142369 |
| C119  | -1.958504678 | -1.294374880 | -5.710681617 |
| C120  | -0.523515913 | 0.979045162  | -4.980791454 |
| C121  | -0.863672176 | -1.407388589 | -4.847495464 |
| C122  | -0.134625252 | -0.271067413 | -4.488784747 |
| C123  | 8.847824589  | -5.357088608 | -3.668245601 |
| C124  | 9.894143923  | -5.420412070 | -2.540982454 |
| C125  | 7.484029026  | -5.915030036 | -3.229414929 |
| C126  | 6.363925005  | -5.762506801 | -4.214329629 |
| C127  | 6.261890826  | -6.332938209 | -5.467792117 |
| C128  | 4.367643942  | -5.294610579 | -4.981454785 |
| C129  | 11.034124778 | -6.709133749 | -0.818335985 |
| C130  | 12.410598838 | -6.323373118 | -1.311829520 |
| C131  | 1.061498126  | -7.161010787 | -0.257147720 |
| C132  | 2.407225732  | -6.641813094 | 0.171246571  |
| C133  | 3.486216262  | -6.685290164 | -0.984050339 |
| C134  | 3.553494377  | -8.131590539 | -1.555279890 |
| C135  | 4.676777459  | -8.313267163 | -2.589284769 |
| C136  | 4.963957727  | -9.751346712 | -2.917560705 |
| C137  | 4.870730733  | -6.400746924 | -0.320643759 |
| C138  | 3.941211373  | -0.306539526 | -1.744277010 |
| Fe139 | 4.448932497  | -1.517815115 | -3.262156833 |
| Fe140 | 2.425344213  | 1.017715006  | -0.984989352 |
| Fe141 | 5.121390950  | 0.904426659  | -0.707152596 |
| Fe142 | 4.499579424  | 1.008307666  | -3.215304226 |
| Fe143 | 4.220297019  | 3.264858745  | -1.844130929 |
| Fe144 | 4.951425272  | -1.667788347 | -0.743151004 |
| Fe145 | 2.416587334  | -1.549234945 | -1.761008722 |
| H146  | -5.564715109 | -7.643529756 | -0.866686225 |
| H147  | -5.679853513 | -6.698277173 | -2.193403439 |
| H148  | -9.346569594 | -5.322154833 | -0.657158237 |
| H149  | -8.056395576 | -6.632906254 | -2.072165093 |
| H150  | -8.005221021 | -7.796381051 | -0.750253729 |
| H151  | -7.988715008 | -3.236662618 | 0.644488768  |
| H152  | -9.215236224 | -6.250178723 | 2.139808180  |
| H153  | -9.715121947 | -3.620219630 | 0.827204887  |
| H154  | -9.007256593 | -7.000309892 | 4.329906655  |
| H155  | -6.619432885 | -6.567837084 | 2.517227232  |
| H156  | -8.937966871 | -5.309868560 | 4.881801509  |
| H157  | -3.063186023 | -2.858297867 | 2.715386951  |
| H158  | -5.316779992 | -4.540579110 | 2.093229717  |
| H159  | -4.371945254 | -7.154208243 | 2.747407485  |
| H160  | -5.756467869 | -0.793861930 | 6.015759705  |
| H161  | -6.367137001 | -2.997293657 | 4.237735960  |
| H162  | -4.508537635 | -7.110735035 | 4.522845611  |
| H163  | -4.625759050 | -2.335438329 | 2.042130587  |
| H164  | -5.652201016 | -4.390406746 | 6.528743973  |
| H165  | -7.079680709 | -1.974843396 | 6.192827390  |
| H166  | -0.281385165 | -3.651022377 | 3.669430525  |
| H167  | -0.188063438 | -2.515383926 | 2.300925332  |
| H168  | 1.212633291  | -2.720059195 | 3.364753458  |
| H169  | -1.503856016 | -1.530574837 | 4.176575731  |
| H170  | -5.112803563 | -5.536059491 | 8.441179413  |
| H171  | -2.809673424 | 1.392369983  | 4.908526434  |
| H172  | -3.061456312 | -0.887599411 | 8.693790200  |
| H173  | -3.557593644 | 2.686023409  | 9.010928189  |
| H174  | -0.126587385 | 0.000688659  | 2.752530470  |
| H175  | 1.204815665  | -0.101501827 | 3.915851488  |
| H176  | 8.405832775  | 2.321039672  | 5.900288560  |
| H177  | -3.898276548 | 2.735061076  | 5.288210192  |
| H178  | -4.324965980 | 3.468394816  | 7.608325636  |
| H179  | -2.138516997 | 2.944919275  | 5.474439278  |

|      |               |              |               |
|------|---------------|--------------|---------------|
| H180 | -2.591029652  | 3.720821753  | 7.933956827   |
| H181 | -3.904750818  | 1.051711174  | 7.145366882   |
| H182 | -0.937068075  | 1.776280022  | 7.400514082   |
| H183 | -2.242734710  | -0.472421383 | 6.096880296   |
| H184 | -0.346085309  | 0.638437321  | 4.393567067   |
| H185 | 0.893085315   | 4.621079082  | 1.039210163   |
| H186 | -0.003718616  | 5.270419371  | 2.447373653   |
| H187 | 2.117336910   | 5.772454613  | 2.880987667   |
| H188 | 2.292502793   | 5.057756355  | 5.439376140   |
| H189 | 4.272368970   | 4.631874788  | 2.534606013   |
| H190 | 6.140438957   | 3.017744373  | 2.422417917   |
| H191 | 5.487043712   | 1.963489843  | 6.555515542   |
| H192 | -1.776211826  | -2.999525532 | 6.214490813   |
| H193 | -0.925164009  | -6.089869342 | 6.564118312   |
| H194 | -0.741868714  | -5.495740388 | 8.230192412   |
| H195 | -3.031897039  | -4.964946818 | 6.416306316   |
| H196 | -4.941662950  | -4.000224705 | 9.326805969   |
| H197 | 3.580192756   | 3.549636998  | 6.656026860   |
| H198 | 1.022902581   | -2.078538481 | 5.796794753   |
| H199 | -3.181380951  | -0.086849860 | 11.351656739  |
| H200 | -3.025402924  | -1.775509643 | 10.803308797  |
| H201 | -0.356770283  | -1.125408740 | 10.723001987  |
| H202 | 10.997532486  | -6.284118098 | 5.394816347   |
| H203 | -0.607898365  | -5.810620274 | -4.395825140  |
| H204 | 1.523705321   | -8.829048241 | 0.595515342   |
| H205 | -0.628815865  | -5.989791096 | -8.905587233  |
| H206 | 0.834379514   | -4.999743261 | -9.144890273  |
| H207 | -1.774220874  | -4.217481370 | -7.724642850  |
| H208 | -1.806116686  | 1.308325325  | -10.125296090 |
| H209 | -1.595581839  | -4.001745308 | -10.249605454 |
| H210 | -2.806216361  | -2.264759107 | -2.854187559  |
| H211 | -3.358515634  | -5.080012966 | -1.778722782  |
| H212 | -0.955111314  | -0.773202927 | -8.769871518  |
| H213 | -3.806452127  | -0.235866581 | -9.354107873  |
| H214 | 0.536441663   | -2.042660040 | -9.678474592  |
| H215 | -0.428945045  | -5.598253264 | -2.655110904  |
| H216 | -0.318381585  | -3.227331087 | -7.581203015  |
| H217 | 0.612024791   | -3.393485876 | -10.616075635 |
| H218 | -6.014653909  | -3.670816451 | -3.885325265  |
| H219 | -3.131329194  | -2.489530454 | -1.131995970  |
| H220 | 2.245640925   | -4.832506963 | -7.551738812  |
| H221 | -1.802131634  | -4.314084644 | -1.441554470  |
| H222 | -4.361586367  | 2.325577417  | 2.532057511   |
| H223 | -2.801637737  | 0.517089629  | 1.153156329   |
| H224 | -8.476262494  | 0.039122677  | 2.645034570   |
| H225 | -7.198199464  | -0.560080290 | 0.008456512   |
| H226 | -7.432325338  | 3.581182933  | 1.392658748   |
| H227 | -9.424461410  | 8.076774616  | 3.348631038   |
| H228 | -7.896863673  | 4.631948822  | 4.356768892   |
| H229 | -9.681819173  | 4.797798198  | 2.226835733   |
| H230 | -7.039797432  | 6.359021285  | 1.959641940   |
| H231 | -11.323296688 | 8.914747193  | -0.344041602  |
| H232 | -3.642587815  | 4.027214321  | 0.852618416   |
| H233 | -5.016040254  | 3.626546425  | -0.180145141  |
| H234 | -10.735721359 | 9.788710545  | 1.982432229   |
| H235 | -8.909101872  | 5.058024931  | 0.661602126   |
| H236 | -6.359231760  | 1.578474684  | 0.500877680   |
| H237 | -7.175822069  | -1.135627888 | 2.433347138   |
| H238 | -9.981003749  | 0.980362376  | -1.525139965  |
| H239 | -2.022158244  | 1.230404552  | -2.945678151  |
| H240 | -10.006359320 | -0.790244489 | -1.518203251  |
| H241 | 9.618770442   | 3.678313968  | 4.366090529   |



|      |              |              |              |
|------|--------------|--------------|--------------|
| H242 | 8.073080247  | 3.779192520  | 3.840994538  |
| H243 | 1.494603004  | 6.493637723  | -0.707243430 |
| H244 | -1.131725332 | 6.011123691  | 0.504623819  |
| H245 | 1.188598887  | 8.690485956  | 0.555247946  |
| H246 | -3.885894267 | 3.711077993  | -2.480379057 |
| H247 | -5.540259886 | 3.301342520  | -3.751296751 |
| H248 | -4.810742815 | 5.017167838  | -2.405975958 |
| H249 | -4.929306711 | 1.215370488  | -4.647950911 |
| H250 | -6.673364286 | 0.903951245  | -4.860636583 |
| H251 | -0.863564841 | 12.344006931 | -1.823658576 |
| H252 | -2.377219691 | 13.293501848 | -1.769401724 |
| H253 | -0.976614306 | 10.079717905 | -2.444997685 |
| H254 | -2.498069877 | 9.229957718  | -2.543900264 |
| H255 | -2.518917256 | 8.998059900  | -5.880045450 |
| H256 | -1.839595318 | 4.398895172  | -5.645617845 |
| H257 | -7.648302961 | 8.110769754  | -1.360576405 |
| H258 | -3.653737904 | 8.389411158  | 1.595934202  |
| H259 | -4.408557097 | 7.353037266  | -3.415887127 |
| H260 | 1.489200937  | 5.181211914  | -3.180002275 |
| H261 | 2.600384624  | 7.261200022  | -2.690034676 |
| H262 | -0.979174164 | 4.602866941  | -3.119601616 |
| H263 | -7.978957565 | -0.821503727 | -2.623406194 |
| H264 | 3.533492667  | 10.164070487 | -3.618796634 |
| H265 | -5.468244061 | -1.117030997 | -3.905156579 |
| H266 | 1.256717604  | 5.996070049  | -4.729704577 |
| H267 | -3.631714647 | 6.879620418  | -0.357225779 |
| H268 | 2.990788858  | 10.695410810 | -2.014117933 |
| H269 | -1.712461737 | 7.599090268  | -6.474504074 |
| H270 | -4.332153247 | 8.711037319  | -4.486592226 |
| H271 | -4.379919037 | -3.730552721 | -4.216396276 |
| H272 | -5.293340891 | -3.623755687 | -1.700880897 |
| H273 | -7.629463239 | 9.710437852  | 0.530604965  |
| H274 | -5.163083707 | 1.192915541  | -2.206700793 |
| H275 | -0.169828473 | 7.725092535  | -3.665433961 |
| H276 | -0.935169602 | 5.883916830  | -5.895658989 |
| H277 | -0.005992674 | 3.887346811  | -4.387590533 |
| H278 | -3.230176696 | 5.470392670  | -3.971469468 |
| H279 | 0.098781437  | 9.672062510  | 3.043211803  |
| H280 | -1.134809445 | 10.338174461 | 0.035683163  |
| H281 | -1.247032881 | 13.239588927 | 0.419294355  |
| H282 | 1.499006067  | 10.287535428 | 2.138534923  |
| H283 | -3.264535496 | 10.724615199 | 1.461602831  |
| H284 | 6.017103658  | -2.225166646 | -8.576096529 |
| H285 | 6.032027581  | -3.711062303 | -7.608958958 |
| H286 | 8.734890891  | -4.288578739 | -3.899626828 |
| H287 | 6.765222366  | -4.254114815 | -9.802105510 |
| H288 | 5.227765450  | -4.816563249 | -9.724277809 |
| H289 | 5.611488639  | 5.570302469  | 0.085256017  |
| H290 | 4.887135502  | 8.090358107  | 1.698757264  |
| H291 | 4.911409612  | 8.573603935  | -2.633476923 |
| H292 | 3.950062713  | 6.081263270  | 0.493963285  |
| H293 | 6.103685531  | 8.966209730  | 1.053820360  |
| H294 | 5.797697385  | 3.689142074  | -5.704605886 |
| H295 | 6.086178753  | 7.737118083  | -0.952182903 |
| H296 | 5.004887681  | -6.497233323 | 5.413723509  |
| H297 | 7.194657239  | -7.300563714 | 3.424200772  |
| H298 | 4.443627189  | 1.894615120  | -6.384314395 |
| H299 | 4.331917389  | 0.366858712  | 3.998338558  |
| H300 | 1.591137852  | 1.950026918  | -8.396740562 |
| H301 | -0.570157540 | -2.380592716 | -4.449693146 |
| H302 | 1.126980369  | 2.368723108  | -6.748859750 |
| H303 | 3.796007146  | -4.210534981 | 4.619376062  |

|      |              |               |              |
|------|--------------|---------------|--------------|
| H304 | 2.937997948  | 0.511811520   | -6.125218049 |
| H305 | 4.027329202  | -4.640930292  | 2.925639434  |
| H306 | 4.823103840  | -6.809394015  | 3.673604997  |
| H307 | 6.480567263  | -4.846567897  | 3.270928552  |
| H308 | 6.296000076  | -4.449649863  | 4.993059956  |
| H309 | -4.141003495 | -0.802673013  | -7.122961090 |
| H310 | 5.872925783  | -8.863228223  | 5.615842520  |
| H311 | 5.239235554  | -11.335424540 | 3.920367271  |
| H312 | 0.716377884  | -0.353732486  | -3.809911852 |
| H313 | 6.351569959  | -11.144292111 | 6.612602056  |
| H314 | 4.857516349  | -11.610249771 | 6.129708112  |
| H315 | 5.174604061  | -2.629490421  | 2.493259423  |
| H316 | 0.044108499  | 1.859307519   | -4.673487272 |
| H317 | -2.527443592 | -2.187693343  | -5.976739836 |
| H318 | 8.440778177  | -9.218181093  | -0.592092981 |
| H319 | 7.599759045  | -6.991388393  | -3.010414427 |
| H320 | 6.995022708  | -7.686258269  | 0.649883239  |
| H321 | 7.910321280  | -9.925479990  | -1.855603861 |
| H322 | 6.057762534  | 3.214949873   | -8.637387269 |
| H323 | 6.693271592  | -4.586160347  | 0.400683042  |
| H324 | 2.789408561  | -7.203777802  | 1.036117292  |
| H325 | 4.450716913  | -1.418600947  | -7.104338894 |
| H326 | 3.716673615  | -8.823806011  | -0.714886621 |
| H327 | 4.595815363  | -6.315509723  | -6.816181110 |
| H328 | 3.351154869  | -4.933834845  | -5.077790790 |
| H329 | 6.860267530  | -11.824709067 | 4.424705363  |
| H330 | 5.060139055  | -0.409902928  | 2.591124552  |
| H331 | 8.608324988  | -5.212016906  | 1.729619233  |
| H332 | 7.337984300  | -3.200379669  | 0.660725271  |
| H333 | 9.018643772  | -6.205711347  | 3.876281181  |
| H334 | 3.755287677  | -2.624093929  | 5.798186760  |
| H335 | 4.166007413  | -11.321619773 | -3.608631973 |
| H336 | 4.398262322  | -7.787899098  | -3.514498815 |
| H337 | 5.615380452  | -7.881725076  | -2.224769035 |
| H338 | 2.588416434  | -8.377015209  | -2.022031885 |
| H339 | 2.383794820  | -1.759346728  | -5.918317615 |
| H340 | -1.911312867 | 2.067766774   | -6.243200091 |
| H341 | -4.031848473 | 0.972949099   | -7.116737282 |
| H342 | 2.294164274  | -5.585825787  | 0.449235946  |
| H343 | 8.792628517  | -6.746184129  | 1.600715612  |
| H344 | 7.696947936  | -8.706368119  | 1.590888987  |
| H345 | 3.630741402  | -0.915582262  | 5.819614894  |
| H346 | 6.966961339  | -6.921678945  | -6.041735890 |
| H347 | 7.186915868  | -5.438113025  | -2.287618941 |
| H348 | 1.718052549  | -2.560447836  | -7.371274764 |
| H349 | 4.751359082  | 4.823598702   | -6.589241950 |
| H350 | 6.940951779  | 0.553552057   | 5.062308058  |
| H351 | 7.224736214  | 1.037489755   | 3.376875454  |
| H352 | 10.212100875 | -5.566903489  | -5.186669442 |
| H353 | 9.603422910  | -6.993758105  | -4.667517985 |
| H354 | 11.078347549 | -7.767106004  | -0.514415557 |
| H355 | 9.394266926  | -7.382533873  | -1.997765489 |
| H356 | 12.563537854 | -6.419398371  | -2.413201709 |
| H357 | 10.778801392 | -6.117036414  | 0.075243166  |
| H358 | 9.954688273  | 0.808768189   | 3.706177944  |
| H359 | -4.390071751 | 12.918218447  | 3.501915946  |
| H360 | 9.860112261  | -6.224579148  | 6.766565346  |
| H361 | 9.208665052  | -3.794119750  | 5.638855177  |
| H362 | -5.828770004 | 11.955529775  | 1.028031726  |
| H363 | -4.955231005 | 9.876586158   | 3.128346119  |
| H364 | -6.626702506 | 10.319286038  | 2.745920566  |
| H365 | -6.475202193 | 6.488354962   | -2.467507921 |

|       |               |               |               |
|-------|---------------|---------------|---------------|
| H366  | 0.147210107   | -1.345993844  | 0.016687275   |
| H367  | 2.316975862   | -2.900191779  | 0.146345115   |
| H368  | 1.541894501   | -0.081505153  | -1.826391662  |
| H369  | -1.589832041  | -0.297025975  | -0.969548504  |
| Mo370 | 4.288193455   | -3.963120013  | -2.060668683  |
| N371  | 2.250450276   | -0.426049903  | 1.571787329   |
| N372  | 2.283497478   | 0.094270896   | 0.574461245   |
| N373  | -6.160621025  | -7.435665369  | -1.672552522  |
| N374  | -8.592372880  | -5.164211780  | 0.006843997   |
| N375  | -8.788174969  | -5.606072321  | 2.801086188   |
| N376  | -6.232087111  | -6.553717136  | 3.460569377   |
| N377  | -4.630870536  | -4.272263423  | 2.800770840   |
| N378  | -5.657496425  | -2.475009361  | 4.757357289   |
| N379  | -5.182988353  | -3.837430345  | 7.250671344   |
| N380  | -2.494470122  | -4.901741341  | 7.287321333   |
| N381  | -0.758162017  | -3.003703203  | 6.236674115   |
| N382  | -1.507803224  | -0.105317224  | 6.704844026   |
| N383  | -2.467894288  | -0.396789925  | 9.365280897   |
| N384  | 5.600275656   | -10.932665544 | 5.952327047   |
| N385  | 6.377418361   | -8.666168432  | 4.744780738   |
| N386  | 4.780632021   | -2.780005817  | 3.426308235   |
| N387  | 3.741544242   | -1.759790504  | 5.266604885   |
| N388  | 4.658839027   | -0.483445581  | 3.550829320   |
| N389  | 8.939527638   | -6.308109054  | 4.911255512   |
| N390  | -5.134978191  | -3.156381313  | -3.800569163  |
| N391  | -0.969516080  | -5.449064349  | -3.508553495  |
| N392  | -5.656572715  | -0.690780985  | -2.985734165  |
| N393  | -8.192054928  | 0.027869187   | -2.106598066  |
| N394  | -7.924869940  | -0.259097066  | 0.672556811   |
| N395  | -6.033808316  | 1.687402033   | 1.464206106   |
| N396  | -3.201917623  | 2.394291918   | -1.558712758  |
| N397  | -2.192955278  | 0.532879516   | -0.919537798  |
| N398  | -6.958453152  | 4.249608755   | 1.995792077   |
| N399  | -10.299512558 | 7.123056460   | 0.278604129   |
| N400  | -10.488309117 | 8.864398359   | 1.640646219   |
| N401  | 8.863033467   | 3.135346233   | 3.941377714   |
| N402  | 5.705906078   | 8.023124419   | 1.084670762   |
| N403  | 4.185638513   | 8.974647274   | -2.044422807  |
| N404  | 1.751252140   | 7.815133979   | -2.900481090  |
| N405  | -2.603933173  | 6.013409103   | -4.606120411  |
| N406  | -2.217853876  | 8.042536989   | -5.715216961  |
| N407  | -3.869228029  | 7.894013427   | -4.097932530  |
| N408  | 0.490050110   | 6.658803392   | -0.613777877  |
| N409  | 0.359343562   | 8.856940395   | 1.133519791   |
| N410  | -1.171968984  | 11.179865918  | 0.613516416   |
| N411  | -1.989033760  | 10.070880551  | -2.271911373  |
| N412  | -3.795193995  | 11.588935032  | 1.387857228   |
| N413  | 5.787611580   | -3.959487152  | -9.753098170  |
| N414  | 3.722236119   | -2.021972651  | -7.506933350  |
| N415  | 2.349081127   | 0.664972247   | -6.963140986  |
| N416  | 4.253627923   | 2.806662479   | -6.815198541  |
| N417  | -0.014889674  | -2.652930233  | -10.294665157 |
| N418  | -1.934857213  | -0.980691845  | -8.988813353  |
| N419  | 9.347111763   | -6.025726866  | -4.886311503  |
| N420  | 5.163432757   | -5.108657424  | -3.931426639  |
| N421  | 5.001037385   | -6.026191012  | -5.930187637  |
| N422  | 10.027449534  | -6.594259921  | -1.861396308  |
| N423  | 0.061399825   | 2.703223872   | -0.436892611  |
| N424  | 0.943660413   | 2.037652160   | -0.659248987  |
| O425  | -6.422879927  | -5.614987211  | 0.545144474   |
| O426  | -7.940098275  | -3.519290398  | 3.141126225   |
| O427  | -6.606747394  | -5.963632376  | 5.639489805   |

|      |               |               |              |
|------|---------------|---------------|--------------|
| O428 | -3.225935965  | -4.947268900  | 4.458116860  |
| O429 | -3.623813516  | -1.460944172  | 4.742979320  |
| O430 | -4.798506533  | -1.766354452  | 8.133254982  |
| O431 | -2.564960238  | -4.747945273  | 9.577344061  |
| O432 | 1.082797752   | -4.279575623  | 6.761268073  |
| O433 | 0.683245421   | -0.182298209  | 7.335682697  |
| O434 | -1.198776945  | 1.419873087   | 9.863935727  |
| O435 | -1.029588429  | -0.807034623  | 12.624740441 |
| O436 | 7.275077796   | -9.776119940  | 2.924350692  |
| O437 | 7.608485391   | -6.946079316  | 6.674279208  |
| O438 | 11.197156259  | -3.771311194  | 6.094859594  |
| O439 | -5.543105552  | -1.225888257  | -0.755407823 |
| O440 | -2.801230570  | -4.613748824  | -4.561089500 |
| O441 | -7.382633497  | 2.030559129   | -1.374970231 |
| O442 | -6.255429095  | 2.778562006   | -4.204375650 |
| O443 | -10.085920322 | 0.458689875   | 0.975209001  |
| O444 | -6.198303799  | 1.014109094   | 3.641866658  |
| O445 | -5.060188048  | 4.721018730   | 3.166496492  |
| O446 | -7.732665422  | 6.662571965   | 4.470675396  |
| O447 | 9.856820005   | 0.212325016   | 5.656089987  |
| O448 | 2.775466646   | 5.103446187   | 4.593796719  |
| O449 | 3.175493616   | 8.936136541   | -0.003411628 |
| O450 | 0.808314028   | 9.905105959   | -3.030319942 |
| O451 | -1.498633050  | 6.979852847   | -1.694869508 |
| O452 | -1.311269765  | 7.821459481   | 2.311258812  |
| O453 | 1.832229221   | 6.204686143   | 2.049787579  |
| O454 | -0.217630746  | 12.263635139  | 2.391237519  |
| O455 | -3.829571558  | 13.695999826  | 0.520052130  |
| O456 | -3.949907908  | 11.216318142  | -2.012677971 |
| O457 | -6.420102537  | 13.069599253  | 3.336719175  |
| O458 | -5.587766215  | 6.525408326   | -2.060496532 |
| O459 | 3.299786759   | -4.030693721  | -8.545832568 |
| O460 | 1.025183975   | -0.391330073  | -8.508922649 |
| O461 | 2.721272141   | 4.227388079   | -7.742455294 |
| O462 | 7.206956757   | 4.675782647   | -7.791851477 |
| O463 | -3.478019140  | -2.559324769  | -9.562550735 |
| O464 | -0.117923098  | -6.407216140  | -6.356767367 |
| O465 | 1.806396342   | -5.385534364  | -6.831701902 |
| O466 | -2.821126700  | 2.454274367   | -8.782165615 |
| O467 | 10.662060025  | -4.467044575  | -2.312220400 |
| O468 | 13.327203952  | -5.998950779  | -0.569487794 |
| O469 | 0.218790487   | -6.542393018  | -0.887551817 |
| O470 | 0.773200706   | -8.459251474  | 0.092723611  |
| O471 | 6.038515609   | -10.326324457 | -2.757797713 |
| O472 | 3.885521050   | -10.397358809 | -3.436650192 |
| O473 | 5.499234379   | -5.365041149  | -0.772921214 |
| O474 | 5.327983530   | -7.180497603  | 0.547458214  |
| O475 | 3.191223007   | -5.757580280  | -1.964487811 |
| O476 | 9.158724038   | -5.957154055  | 2.081453900  |
| O477 | 7.283236466   | -4.102810505  | 1.032788875  |
| O478 | -4.381810375  | 4.402540973   | -3.038251504 |
| O479 | 8.746345984   | -9.725618272  | -1.386454265 |
| O480 | 7.884255226   | -8.108237443  | 0.820487069  |
| S481 | 4.168093338   | 5.594711874   | -1.883799443 |
| S482 | 2.633590233   | 2.254368950   | -3.083732886 |
| S483 | 2.688962426   | -2.904256816  | -3.488932871 |
| S484 | 3.799300945   | 2.482316541   | 0.286449396  |
| S485 | 0.328019512   | -2.281886748  | -0.952119280 |
| S486 | 4.939306377   | -0.208564390  | -5.021656546 |
| S487 | 3.638348972   | -3.307527167  | 0.244062862  |
| S488 | 6.175524187   | 2.163640487   | -2.329026804 |
| S489 | 6.207790989   | -2.601533946  | -2.339788779 |

|                  |                                      |              |               |              |
|------------------|--------------------------------------|--------------|---------------|--------------|
|                  | S490                                 | 6.197709847  | -0.508681205  | 0.670804661  |
| <b>21, 47(2)</b> | <b>bm1unh2b2n2x2n2n263b247.car_1</b> |              |               |              |
| Fe1 3.22         | C1                                   | -7.425669381 | -5.843368019  | -0.158344120 |
| Fe2 -0.02        | C2                                   | -7.454722476 | -6.959549295  | -1.208129420 |
| Fe3 2.57         | C3                                   | -8.701766018 | -4.030919888  | 0.915747352  |
| Fe4 -2.79        | C4                                   | -8.440799971 | -4.364184579  | 2.382197342  |
| Fe5 2.13         | C5                                   | -8.521928166 | -6.028455773  | 4.167756300  |
| Fe6 1.47         | C6                                   | -7.029291796 | -6.165011368  | 4.490316876  |
| Fe7 -2.47        | C7                                   | -4.785862953 | -6.592183917  | 3.597902903  |
|                  | C8                                   | -4.140095997 | -5.202853379  | 3.654636494  |
|                  | C9                                   | -4.152201856 | -2.898033868  | 2.855798528  |
|                  | C10                                  | -4.450080241 | -2.210860206  | 4.197323267  |
|                  | C11                                  | -5.997798082 | -1.861797354  | 6.028703339  |
|                  | C12                                  | -5.257401474 | -2.477625232  | 7.223748391  |
|                  | C13                                  | -4.656452638 | -4.530611961  | 8.413979580  |
|                  | C14                                  | -3.135672150 | -4.722156457  | 8.476714310  |
|                  | C15                                  | -1.081426980 | -5.226936010  | 7.219713836  |
|                  | C16                                  | -0.148133905 | -4.118684388  | 6.719768927  |
|                  | C17                                  | -0.044227567 | -1.843521136  | 5.722027520  |
|                  | C18                                  | -0.250318516 | -0.643059609  | 6.660953751  |
|                  | C19                                  | -0.406268682 | -1.551421408  | 4.247266649  |
|                  | C20                                  | 0.107860913  | -0.175306808  | 3.813358672  |
|                  | C21                                  | 0.112133965  | -2.678103388  | 3.345696234  |
|                  | C22                                  | -1.773353463 | 1.075271446   | 7.519957345  |
|                  | C23                                  | -1.781056609 | 0.723049589   | 9.018447075  |
|                  | C24                                  | -3.070562886 | 1.782118629   | 7.059587813  |
|                  | C25                                  | -3.395160339 | 2.979217806   | 7.959897678  |
|                  | C26                                  | -2.959603526 | 2.233742325   | 5.596786810  |
|                  | C27                                  | -2.557638360 | -0.775020541  | 10.762228951 |
|                  | C28                                  | -1.199216539 | -0.884481703  | 11.423108847 |
|                  | C29                                  | 6.083002556  | -11.054088626 | 4.571441775  |
|                  | C30                                  | 6.647084903  | -9.754836032  | 4.004416300  |
|                  | C31                                  | 6.756673423  | -7.294952647  | 4.429032864  |
|                  | C32                                  | 7.808599031  | -6.824699335  | 5.452134906  |
|                  | C33                                  | 5.505636509  | -6.401036958  | 4.433364142  |
|                  | C34                                  | 5.801524186  | -4.931934227  | 4.130592408  |
|                  | C35                                  | 4.519560282  | -4.173237406  | 3.782740058  |
|                  | C36                                  | 4.403661684  | -1.682718138  | 4.075643670  |
|                  | C37                                  | 10.042498383 | -5.857888321  | 5.739352228  |
|                  | C38                                  | 10.159600281 | -4.350369705  | 5.822784003  |
|                  | C39                                  | -4.825227089 | -2.895406243  | -2.384213800 |
|                  | C40                                  | -5.378830166 | -1.524534978  | -1.952026099 |
|                  | C41                                  | -3.306395974 | -2.920989468  | -2.126848882 |
|                  | C42                                  | -2.647715202 | -4.316322114  | -2.145292643 |
|                  | C43                                  | -2.153038319 | -4.793369767  | -3.507196859 |
|                  | C44                                  | -5.960211957 | 0.727035257   | -2.822468890 |
|                  | C45                                  | -7.258987217 | 0.993379074   | -2.062694017 |
|                  | C46                                  | -5.928061685 | 1.403821216   | -4.220345344 |
|                  | C47                                  | -9.393351487 | 0.068978759   | -1.286650035 |
|                  | C48                                  | -9.156901301 | 0.112219961   | 0.228777005  |
|                  | C49                                  | -7.562191545 | -0.167905215  | 2.072961530  |
|                  | C50                                  | -6.539533736 | 0.904140769   | 2.458438122  |
|                  | C51                                  | -5.050197497 | 2.724315870   | 1.776270124  |
|                  | C52                                  | -5.689297777 | 3.980385412   | 2.409066085  |
|                  | C53                                  | -4.284841548 | 3.195050679   | 0.528442342  |
|                  | C54                                  | -3.465432495 | 2.181524877   | -0.212632092 |
|                  | C55                                  | -2.828593287 | 1.028256567   | 0.198597084  |
|                  | C56                                  | -2.431147649 | 1.377545749   | -1.950206218 |
|                  | C57                                  | -7.629566621 | 5.502209631   | 2.332836318  |
|                  | C58                                  | -7.751134409 | 5.614226107   | 3.850236814  |
|                  | C59                                  | -9.027097358 | 5.484835609   | 1.667072138  |

|      |               |              |              |
|------|---------------|--------------|--------------|
| C60  | -9.677949279  | 6.823539264  | 1.476416653  |
| C61  | -9.792041009  | 7.900031295  | 2.335100075  |
| C62  | -10.773756456 | 8.348302249  | 0.399638786  |
| C63  | 8.478880489   | 2.034184852  | 4.835864672  |
| C64  | 9.514992282   | 0.932057936  | 4.731168703  |
| C65  | 7.122531370   | 1.412815604  | 4.413005540  |
| C66  | 5.974210407   | 2.389769913  | 4.492909156  |
| C67  | 5.227761547   | 2.552303420  | 5.675693027  |
| C68  | 5.612959307   | 3.159871565  | 3.375252537  |
| C69  | 4.153794688   | 3.448105701  | 5.739140682  |
| C70  | 4.555161518   | 4.067335723  | 3.427359269  |
| C71  | 3.822596378   | 4.206496885  | 4.609673388  |
| C72  | 5.238809543   | 7.655935763  | -0.259615998 |
| C73  | 4.109918041   | 8.572620490  | -0.748922044 |
| C74  | 4.766380804   | 6.191458401  | -0.239769959 |
| C75  | 3.167039851   | 9.811927779  | -2.646211481 |
| C76  | 1.798715505   | 9.166237401  | -2.864389162 |
| C77  | 0.486659383   | 7.094047212  | -3.061530961 |
| C78  | -0.262972236  | 6.905313870  | -1.726852224 |
| C79  | 0.756233726   | 5.760069191  | -3.781809095 |
| C80  | -0.441796487  | 4.843036011  | -4.056527238 |
| C81  | -1.447605835  | 5.290074333  | -5.135270761 |
| C82  | -2.907855733  | 7.295241175  | -4.832370280 |
| C83  | -0.151996435  | 6.468017293  | 0.679963478  |
| C84  | -0.429118315  | 7.780369241  | 1.439390585  |
| C85  | 0.644427286   | 5.530750431  | 1.594014047  |
| C86  | 0.447229936   | 9.981551137  | 2.048031985  |
| C87  | -0.335478563  | 11.243794479 | 1.695213692  |
| C88  | -1.839358970  | 12.372585534 | 0.104248869  |
| C89  | -3.246017919  | 12.616040373 | 0.691548537  |
| C90  | -1.891200443  | 12.364824825 | -1.441906439 |
| C91  | -2.707355852  | 11.188581895 | -1.966135684 |
| C92  | -5.172663840  | 11.630038274 | 1.854141808  |
| C93  | -5.332322420  | 12.629241455 | 2.993212231  |
| C94  | -5.617867587  | 10.215410772 | 2.316842190  |
| C95  | -5.630521044  | 9.202284417  | 1.192401423  |
| C96  | -6.745789076  | 9.094747537  | 0.346457302  |
| C97  | -4.525369021  | 8.372402243  | 0.936748391  |
| C98  | -6.760303336  | 8.199188874  | -0.726356661 |
| C99  | -4.512337698  | 7.487595101  | -0.146983506 |
| C100 | -5.634461987  | 7.409647703  | -0.970575435 |
| C101 | 5.574555431   | -3.227370033 | -8.499070116 |
| C102 | 4.090869463   | -3.115167218 | -8.193564065 |
| C103 | 2.371967962   | -1.759805117 | -7.019864276 |
| C104 | 1.840495936   | -0.432324917 | -7.567136605 |
| C105 | 1.960544307   | 2.007733282  | -7.369923773 |
| C106 | 3.024433427   | 3.100395581  | -7.327983319 |
| C107 | 5.247695103   | 3.850270956  | -6.647770162 |
| C108 | 6.248642886   | 3.920137464  | -7.783831692 |
| C109 | -1.157739736  | -3.246165060 | -9.581490604 |
| C110 | -2.296110182  | -2.235047027 | -9.386976699 |
| C111 | -0.842068449  | -3.940036958 | -8.235975183 |
| C112 | 0.003060316   | -5.209554603 | -8.453954118 |
| C113 | 0.543411931   | -5.730956290 | -7.141680586 |
| C114 | -2.948804564  | 0.026855312  | -8.708558758 |
| C115 | -2.481952256  | 1.370941790  | -9.234992895 |
| C116 | -3.453602567  | 0.045607117  | -7.243731595 |
| C117 | -2.339344317  | -0.044225989 | -6.232148815 |
| C118 | -1.615660613  | 1.096104619  | -5.846489954 |
| C119 | -1.954218712  | -1.291542768 | -5.710263314 |
| C120 | -0.522568147  | 0.983729542  | -4.980923297 |
| C121 | -0.857439741  | -1.402767599 | -4.848846473 |

|       |              |              |              |
|-------|--------------|--------------|--------------|
| C122  | -0.129208171 | -0.265408136 | -4.490364083 |
| C123  | 8.848043632  | -5.353162619 | -3.664796213 |
| C124  | 9.893486978  | -5.416775345 | -2.537042712 |
| C125  | 7.483797802  | -5.911430135 | -3.226882573 |
| C126  | 6.363305842  | -5.758742833 | -4.212001445 |
| C127  | 6.259705229  | -6.329191893 | -5.465582968 |
| C128  | 4.368481253  | -5.285419298 | -4.978818222 |
| C129  | 11.033031199 | -6.704565155 | -0.814520196 |
| C130  | 12.409958790 | -6.320076375 | -1.308885992 |
| C131  | 1.061462860  | -7.159882052 | -0.258917238 |
| C132  | 2.407150299  | -6.640882675 | 0.169550890  |
| C133  | 3.492117499  | -6.690602480 | -0.978895227 |
| C134  | 3.553953869  | -8.134475393 | -1.553091249 |
| C135  | 4.677952882  | -8.309822084 | -2.586425710 |
| C136  | 4.965931731  | -9.746479691 | -2.915611288 |
| C137  | 4.876049696  | -6.415365029 | -0.310458788 |
| C138  | 3.937576787  | -0.305275388 | -1.743830379 |
| Fe139 | 4.440766947  | -1.533845694 | -3.259890144 |
| Fe140 | 2.470890202  | 1.012201465  | -0.953329818 |
| Fe141 | 5.121422769  | 0.895876904  | -0.694902703 |
| Fe142 | 4.509756867  | 1.003005423  | -3.206299106 |
| Fe143 | 4.212304971  | 3.265308052  | -1.846696350 |
| Fe144 | 4.958169562  | -1.670142174 | -0.730188543 |
| Fe145 | 2.422912812  | -1.544421341 | -1.740993871 |
| H146  | -5.565182049 | -7.641939419 | -0.866108653 |
| H147  | -5.683205828 | -6.698495112 | -2.194000386 |
| H148  | -9.348762765 | -5.324314324 | -0.655080306 |
| H149  | -8.059642331 | -6.636279871 | -2.069559820 |
| H150  | -8.004945030 | -7.798486642 | -0.746753722 |
| H151  | -7.990397642 | -3.237650872 | 0.644886320  |
| H152  | -9.216600656 | -6.249964529 | 2.141553950  |
| H153  | -9.716776169 | -3.620862017 | 0.827801223  |
| H154  | -9.008479820 | -6.998950550 | 4.332203877  |
| H155  | -6.621445958 | -6.569295821 | 2.519421092  |
| H156  | -8.939308777 | -5.308048875 | 4.882947471  |
| H157  | -3.064316093 | -2.859835741 | 2.711180948  |
| H158  | -5.320093601 | -4.541065361 | 2.093023968  |
| H159  | -4.373870027 | -7.154722857 | 2.749158448  |
| H160  | -5.755783082 | -0.791159277 | 6.011689775  |
| H161  | -6.367220886 | -2.997151047 | 4.236680228  |
| H162  | -4.509469418 | -7.109249592 | 4.524567392  |
| H163  | -4.626200565 | -2.336658610 | 2.037962116  |
| H164  | -5.653334969 | -4.387353602 | 6.530194102  |
| H165  | -7.078718109 | -1.972225134 | 6.190717895  |
| H166  | -0.275970299 | -3.655604375 | 3.670572514  |
| H167  | -0.200032054 | -2.518980139 | 2.301844384  |
| H168  | 1.212090560  | -2.717344624 | 3.354527066  |
| H169  | -1.505295550 | -1.537592669 | 4.178815792  |
| H170  | -5.117627060 | -5.528262476 | 8.447342307  |
| H171  | -2.800177970 | 1.394319886  | 4.905649436  |
| H172  | -3.056432133 | -0.888827723 | 8.694147521  |
| H173  | -3.548796894 | 2.686106830  | 9.008514993  |
| H174  | -0.133125464 | -0.001646294 | 2.755194929  |
| H175  | 1.198717372  | -0.100443656 | 3.918139203  |
| H176  | 8.401318850  | 2.320899535  | 5.902528924  |
| H177  | -3.885431129 | 2.739343020  | 5.287172273  |
| H178  | -4.313398609 | 3.469945180  | 7.606070299  |
| H179  | -2.125692140 | 2.944624032  | 5.474361789  |
| H180  | -2.580031920 | 3.719195241  | 7.933103323  |
| H181  | -3.897241103 | 1.053081261  | 7.141721932  |
| H182  | -0.928571163 | 1.771363853  | 7.399609055  |
| H183  | -2.238270324 | -0.473019556 | 6.095442035  |

|      |               |              |               |
|------|---------------|--------------|---------------|
| H184 | -0.354173319  | 0.633462063  | 4.396728466   |
| H185 | 0.882728330   | 4.611862952  | 1.033264485   |
| H186 | -0.006931728  | 5.266928727  | 2.442612656   |
| H187 | 2.113295070   | 5.764057645  | 2.875630584   |
| H188 | 2.284841509   | 5.054823721  | 5.440975148   |
| H189 | 4.268615471   | 4.630068246  | 2.538950926   |
| H190 | 6.136787056   | 3.016235189  | 2.428329393   |
| H191 | 5.477239561   | 1.959027350  | 6.559783486   |
| H192 | -1.776535942  | -3.003117177 | 6.216144008   |
| H193 | -0.931359022  | -6.095384664 | 6.560739083   |
| H194 | -0.745176955  | -5.502995921 | 8.227449467   |
| H195 | -3.035091967  | -4.963079920 | 6.415352522   |
| H196 | -4.938053367  | -3.989781061 | 9.326294166   |
| H197 | 3.570710369   | 3.545570741  | 6.658564752   |
| H198 | 1.023263959   | -2.086194782 | 5.795771597   |
| H199 | -3.183951266  | -0.083821519 | 11.349195596  |
| H200 | -3.022023723  | -1.772846407 | 10.806449816  |
| H201 | -0.355812111  | -1.119238251 | 10.733332966  |
| H202 | 10.996822760  | -6.282028636 | 5.392974197   |
| H203 | -0.609498874  | -5.802933653 | -4.397814745  |
| H204 | 1.527920502   | -8.829936376 | 0.586696061   |
| H205 | -0.629358194  | -5.989336273 | -8.903057957  |
| H206 | 0.832461034   | -4.998036328 | -9.144965810  |
| H207 | -1.775300018  | -4.217221720 | -7.722398749  |
| H208 | -1.809739562  | 1.306211903  | -10.123991285 |
| H209 | -1.599869893  | -4.003953543 | -10.247309681 |
| H210 | -2.812653620  | -2.262441042 | -2.858216912  |
| H211 | -3.359652591  | -5.076381540 | -1.776721152  |
| H212 | -0.959962127  | -0.774431085 | -8.771151164  |
| H213 | -3.813119082  | -0.237066679 | -9.350664291  |
| H214 | 0.530079483   | -2.040218709 | -9.681753747  |
| H215 | -0.427094826  | -5.585982119 | -2.658461509  |
| H216 | -0.320413194  | -3.225487628 | -7.581041779  |
| H217 | 0.607487673   | -3.393801733 | -10.615143924 |
| H218 | -6.021571776  | -3.678368634 | -3.873075269  |
| H219 | -3.130838159  | -2.482687107 | -1.133853335  |
| H220 | 2.246489557   | -4.830067168 | -7.555262628  |
| H221 | -1.803062488  | -4.309949849 | -1.442889936  |
| H222 | -4.359967179  | 2.327939333  | 2.533655316   |
| H223 | -2.781552625  | 0.524764890  | 1.158446345   |
| H224 | -8.476501948  | 0.037954364  | 2.645158037   |
| H225 | -7.198275707  | -0.560061092 | 0.008785960   |
| H226 | -7.432000993  | 3.578061376  | 1.402269697   |
| H227 | -9.431076594  | 8.073998411  | 3.342742942   |
| H228 | -7.902786306  | 4.632161962  | 4.360993281   |
| H229 | -9.683230485  | 4.793245176  | 2.223519064   |
| H230 | -7.043458048  | 6.359228815  | 1.964274650   |
| H231 | -11.316705451 | 8.908769902  | -0.357810991  |
| H232 | -3.636880866  | 4.025216161  | 0.854616159   |
| H233 | -5.008855175  | 3.627611309  | -0.180075885  |
| H234 | -10.738184605 | 9.784927591  | 1.970629505   |
| H235 | -8.904493354  | 5.053158785  | 0.661770816   |
| H236 | -6.351161506  | 1.573317191  | 0.501509969   |
| H237 | -7.172400453  | -1.131283305 | 2.431502868   |
| H238 | -9.993347005  | 0.957082524  | -1.529974899  |
| H239 | -2.031167203  | 1.218981590  | -2.948742979  |
| H240 | -10.007034581 | -0.813949348 | -1.512155730  |
| H241 | 9.614645800   | 3.672355640  | 4.359819520   |
| H242 | 8.066179875   | 3.776316226  | 3.843159381   |
| H243 | 1.492703932   | 6.492373575  | -0.712675226  |
| H244 | -1.134541258  | 6.009514627  | 0.499871032   |
| H245 | 1.190180659   | 8.686469928  | 0.553713061   |



|      |              |              |              |
|------|--------------|--------------|--------------|
| H246 | -3.889513501 | 3.712287802  | -2.484457071 |
| H247 | -5.540238472 | 3.300016626  | -3.758908733 |
| H248 | -4.815949704 | 5.019927288  | -2.409558534 |
| H249 | -4.921823575 | 1.214867474  | -4.638480095 |
| H250 | -6.663868472 | 0.903978233  | -4.871190197 |
| H251 | -0.858809644 | 12.345833522 | -1.820509885 |
| H252 | -2.370915201 | 13.297992081 | -1.764997343 |
| H253 | -0.976274662 | 10.082866525 | -2.446169765 |
| H254 | -2.499300363 | 9.236721075  | -2.547169642 |
| H255 | -2.520018834 | 9.004895382  | -5.884028151 |
| H256 | -1.845719156 | 4.405298543  | -5.652123180 |
| H257 | -7.644093050 | 8.118624998  | -1.363872109 |
| H258 | -3.651281719 | 8.394118375  | 1.594751808  |
| H259 | -4.409204246 | 7.362326488  | -3.418692424 |
| H260 | 1.485878121  | 5.184192954  | -3.189869821 |
| H261 | 2.597181820  | 7.261180871  | -2.695433538 |
| H262 | -0.981728982 | 4.603907540  | -3.127478651 |
| H263 | -7.976044571 | -0.840357835 | -2.615126481 |
| H264 | 3.532596728  | 10.164309890 | -3.620596324 |
| H265 | -5.482768240 | -1.123769599 | -3.902795968 |
| H266 | 1.251077717  | 6.002862667  | -4.736862294 |
| H267 | -3.628447948 | 6.884834544  | -0.359414774 |
| H268 | 2.991600976  | 10.693664180 | -2.014708930 |
| H269 | -1.718060050 | 7.604449488  | -6.481604937 |
| H270 | -4.332641879 | 8.719821175  | -4.489880894 |
| H271 | -4.387938234 | -3.734502000 | -4.209593996 |
| H272 | -5.290817413 | -3.620500151 | -1.688929503 |
| H273 | -7.625867850 | 9.715550268  | 0.528725977  |
| H274 | -5.179597309 | 1.191857965  | -2.202910796 |
| H275 | -0.173560563 | 7.728762828  | -3.667985418 |
| H276 | -0.940504999 | 5.890609462  | -5.901656070 |
| H277 | -0.009504903 | 3.892242280  | -4.398142541 |
| H278 | -3.232157936 | 5.478194656  | -3.977723960 |
| H279 | 0.097352128  | 9.665128923  | 3.042014742  |
| H280 | -1.133051754 | 10.337994934 | 0.035395539  |
| H281 | -1.241182294 | 13.238839529 | 0.423671606  |
| H282 | 1.500488993  | 10.280002322 | 2.141791998  |
| H283 | -3.263671767 | 10.726755988 | 1.462701475  |
| H284 | 6.018746009  | -2.223928160 | -8.570673453 |
| H285 | 6.029590682  | -3.713814473 | -7.611187695 |
| H286 | 8.734185510  | -4.284577011 | -3.896375768 |
| H287 | 6.763396053  | -4.245268634 | -9.808668098 |
| H288 | 5.225834832  | -4.809238097 | -9.730779042 |
| H289 | 5.611099749  | 5.570239568  | 0.086174193  |
| H290 | 4.890514920  | 8.089688017  | 1.698231975  |
| H291 | 4.910140142  | 8.570569609  | -2.638857149 |
| H292 | 3.950319869  | 6.084373084  | 0.489854225  |
| H293 | 6.108661094  | 8.965818781  | 1.053718858  |
| H294 | 5.789115732  | 3.694253278  | -5.701843667 |
| H295 | 6.091066373  | 7.737128341  | -0.953265623 |
| H296 | 5.002743083  | -6.497230243 | 5.410394357  |
| H297 | 7.195061533  | -7.299940469 | 3.424030977  |
| H298 | 4.432530463  | 1.903408373  | -6.370847164 |
| H299 | 4.344163216  | 0.365963168  | 3.993720095  |
| H300 | 1.586084238  | 1.953051309  | -8.400324793 |
| H301 | -0.561571779 | -2.375879536 | -4.451585094 |
| H302 | 1.122606346  | 2.371133125  | -6.752238624 |
| H303 | 3.792968914  | -4.211175081 | 4.605506617  |
| H304 | 2.938818179  | 0.514116904  | -6.131882104 |
| H305 | 4.033614187  | -4.646456811 | 2.914812713  |
| H306 | 4.823782370  | -6.809730562 | 3.670080970  |
| H307 | 6.484188509  | -4.848529615 | 3.270822278  |

|      |              |               |              |
|------|--------------|---------------|--------------|
| H308 | 6.292951853  | -4.449350281  | 4.991439730  |
| H309 | -4.140736314 | -0.803496195  | -7.117705817 |
| H310 | 5.873870307  | -8.861568420  | 5.616329741  |
| H311 | 5.240323711  | -11.333366693 | 3.920258078  |
| H312 | 0.724015243  | -0.348268608  | -3.813609254 |
| H313 | 6.352597877  | -11.139859419 | 6.612979132  |
| H314 | 4.858784831  | -11.608298182 | 6.130665432  |
| H315 | 5.176604283  | -2.632679242  | 2.481893648  |
| H316 | 0.043192179  | 1.864787335   | -4.673112184 |
| H317 | -2.521990142 | -2.186367345  | -5.975262087 |
| H318 | 8.441259608  | -9.212768998  | -0.590621419 |
| H319 | 7.599742045  | -6.987905878  | -3.007561043 |
| H320 | 6.988180622  | -7.688803366  | 0.654801051  |
| H321 | 7.913583125  | -9.921767781  | -1.854712600 |
| H322 | 6.055898166  | 3.221310886   | -8.633893826 |
| H323 | 6.693105529  | -4.590576674  | 0.405141126  |
| H324 | 2.785684723  | -7.199227011  | 1.038238918  |
| H325 | 4.448840123  | -1.416092916  | -7.102967854 |
| H326 | 3.712875627  | -8.832146821  | -0.715941173 |
| H327 | 4.593633387  | -6.309482369  | -6.812814869 |
| H328 | 3.352787965  | -4.923122332  | -5.074256544 |
| H329 | 6.860549488  | -11.823100961 | 4.425344024  |
| H330 | 5.062222384  | -0.413490558  | 2.580232491  |
| H331 | 8.604443103  | -5.212778513  | 1.728768388  |
| H332 | 7.354318246  | -3.207553970  | 0.641056748  |
| H333 | 9.017891726  | -6.203360838  | 3.875143369  |
| H334 | 3.767961418  | -2.627751338  | 5.790528855  |
| H335 | 4.165005543  | -11.316860063 | -3.603522953 |
| H336 | 4.397960252  | -7.782218845  | -3.509646011 |
| H337 | 5.615353623  | -7.876242396  | -2.221431652 |
| H338 | 2.588053468  | -8.370654727  | -2.022836660 |
| H339 | 2.379074957  | -1.756502688  | -5.918447557 |
| H340 | -1.914401614 | 2.070606893   | -6.239708209 |
| H341 | -4.033239383 | 0.972166982   | -7.113732823 |
| H342 | 2.293949082  | -5.583960880  | 0.443311193  |
| H343 | 8.789534121  | -6.746676183  | 1.599297333  |
| H344 | 7.699655058  | -8.706075456  | 1.590684968  |
| H345 | 3.637546497  | -0.918745156  | 5.811401767  |
| H346 | 6.963813739  | -6.919641143  | -6.039663728 |
| H347 | 7.186113074  | -5.434617475  | -2.285081922 |
| H348 | 1.717898437  | -2.559069881  | -7.373735110 |
| H349 | 4.744711323  | 4.828796480   | -6.587132962 |
| H350 | 6.934802975  | 0.551624069   | 5.070969681  |
| H351 | 7.217128838  | 1.031948979   | 3.383826524  |
| H352 | 10.212835552 | -5.563545794  | -5.182546914 |
| H353 | 9.603191662  | -6.990242436  | -4.663202527 |
| H354 | 11.077035465 | -7.762076850  | -0.509083204 |
| H355 | 9.394002241  | -7.378448858  | -1.993997637 |
| H356 | 12.561903739 | -6.417292423  | -2.410682475 |
| H357 | 10.778763304 | -6.111525077  | 0.078554541  |
| H358 | 9.948256164  | 0.806031281   | 3.709808107  |
| H359 | -4.385389222 | 12.915616942  | 3.508358378  |
| H360 | 9.860187492  | -6.222176417  | 6.765218072  |
| H361 | 9.210003947  | -3.790914739  | 5.637459776  |
| H362 | -5.827165394 | 11.962544790  | 1.032111404  |
| H363 | -4.953030645 | 9.878718794   | 3.127988359  |
| H364 | -6.624942490 | 10.321624738  | 2.746229006  |
| H365 | -6.472272045 | 6.495904953   | -2.471217170 |
| H366 | 0.149275036  | -1.404903668  | -0.029768160 |
| H367 | 2.376569506  | -2.867628503  | 0.206069395  |
| H368 | 1.579700745  | -0.071565353  | -1.788521978 |
| H369 | -1.578272689 | -0.294494247  | -0.970825916 |

|       |               |               |               |
|-------|---------------|---------------|---------------|
| Mo370 | 4.299309168   | -3.972213603  | -2.050904690  |
| N371  | 2.235102438   | -0.456145704  | 1.586006694   |
| N372  | 2.316931828   | 0.073714679   | 0.596104331   |
| N373  | -6.162247617  | -7.435890277  | -1.671566556  |
| N374  | -8.594126247  | -5.165112084  | 0.008024706   |
| N375  | -8.789367340  | -5.605705675  | 2.802540269   |
| N376  | -6.233686586  | -6.553620983  | 3.462545241   |
| N377  | -4.632896018  | -4.272472961  | 2.799194978   |
| N378  | -5.657332076  | -2.473532948  | 4.754664764   |
| N379  | -5.182505031  | -3.833631201  | 7.250482133   |
| N380  | -2.497224332  | -4.903576640  | 7.286406736   |
| N381  | -0.758619300  | -3.009019326  | 6.236301114   |
| N382  | -1.503462775  | -0.110005178  | 6.705388244   |
| N383  | -2.463508300  | -0.397060078  | 9.366326908   |
| N384  | 5.600836014   | -10.930169744 | 5.952569246   |
| N385  | 6.379067069   | -8.665132324  | 4.745604010   |
| N386  | 4.782300232   | -2.783411070  | 3.415104174   |
| N387  | 3.749041080   | -1.763523749  | 5.259118533   |
| N388  | 4.655981942   | -0.486519170  | 3.538386782   |
| N389  | 8.938907935   | -6.304800789  | 4.910410219   |
| N390  | -5.143092869  | -3.161731893  | -3.792272578  |
| N391  | -0.971862397  | -5.443273853  | -3.510109675  |
| N392  | -5.663790436  | -0.692099146  | -2.984480012  |
| N393  | -8.199664176  | 0.013452765   | -2.109578794  |
| N394  | -7.924106378  | -0.255473319  | 0.671823692   |
| N395  | -6.032845452  | 1.690313457   | 1.465684838   |
| N396  | -3.207970922  | 2.387359856   | -1.559974084  |
| N397  | -2.187834440  | 0.531960240   | -0.918284059  |
| N398  | -6.957438031  | 4.250685755   | 2.000367455   |
| N399  | -10.296017097 | 7.116419774   | 0.271407895   |
| N400  | -10.488895937 | 8.859883392   | 1.630769691   |
| N401  | 8.854986273   | 3.130623527   | 3.940833026   |
| N402  | 5.709462593   | 8.022872190   | 1.083960858   |
| N403  | 4.186224709   | 8.972917412   | -2.048096637  |
| N404  | 1.748416691   | 7.816161224   | -2.904415483  |
| N405  | -2.607952489  | 6.020078419   | -4.610095111  |
| N406  | -2.220764775  | 8.048440538   | -5.720774961  |
| N407  | -3.870420766  | 7.902331631   | -4.101745311  |
| N408  | 0.487787124   | 6.655127148   | -0.618797999  |
| N409  | 0.361114357   | 8.852163659   | 1.132602044   |
| N410  | -1.169381444  | 11.178371811  | 0.615157952   |
| N411  | -1.988517935  | 10.075573782  | -2.272680363  |
| N412  | -3.793426382  | 11.591778466  | 1.389257423   |
| N413  | 5.785196279   | -3.951373213  | -9.757631850  |
| N414  | 3.721238384   | -2.019768307  | -7.505904086  |
| N415  | 2.345286078   | 0.667176465   | -6.967276801  |
| N416  | 4.247539270   | 2.810818409   | -6.813258942  |
| N417  | -0.020539195  | -2.653169706  | -10.296090287 |
| N418  | -1.940043576  | -0.982246727  | -8.988684093  |
| N419  | 9.347499431   | -6.022146772  | -4.882829099  |
| N420  | 5.164447491   | -5.101898731  | -3.929171603  |
| N421  | 4.999424226   | -6.019104767  | -5.927671319  |
| N422  | 10.027092073  | -6.590418191  | -1.857536689  |
| N423  | 0.072713527   | 2.664104180   | -0.432514280  |
| N424  | 0.965346967   | 2.008882324   | -0.643585932  |
| O425  | -6.424722626  | -5.615414766  | 0.545974013   |
| O426  | -7.942037113  | -3.518350153  | 3.141316677   |
| O427  | -6.607585277  | -5.960102895  | 5.640700404   |
| O428  | -3.227042985  | -4.945741684  | 4.456302788   |
| O429  | -3.624642893  | -1.457471838  | 4.736437265   |
| O430  | -4.795297362  | -1.761065210  | 8.128670276   |
| O431  | -2.565644925  | -4.753182814  | 9.576622976   |

|                              |                                      |               |               |              |
|------------------------------|--------------------------------------|---------------|---------------|--------------|
|                              | O432                                 | 1.080595838   | -4.289168936  | 6.756904046  |
|                              | O433                                 | 0.686254882   | -0.190906691  | 7.337329255  |
|                              | O434                                 | -1.193238113  | 1.419785365   | 9.863433298  |
|                              | O435                                 | -1.034593817  | -0.791798042  | 12.630962073 |
|                              | O436                                 | 7.276576682   | -9.774494495  | 2.925107286  |
|                              | O437                                 | 7.607537543   | -6.941281534  | 6.674025487  |
|                              | O438                                 | 11.198789855  | -3.769389598  | 6.092509237  |
|                              | O439                                 | -5.544253730  | -1.221050356  | -0.752501179 |
|                              | O440                                 | -2.807889969  | -4.613622119  | -4.559457525 |
|                              | O441                                 | -7.414806868  | 2.035202676   | -1.403194085 |
|                              | O442                                 | -6.251869493  | 2.777735643   | -4.211783389 |
|                              | O443                                 | -10.089022016 | 0.450657452   | 0.973650213  |
|                              | O444                                 | -6.205395411  | 1.023510221   | 3.644431868  |
|                              | O445                                 | -5.052909324  | 4.727159578   | 3.161254268  |
|                              | O446                                 | -7.737159050  | 6.662963144   | 4.473573431  |
|                              | O447                                 | 9.850196314   | 0.209699434   | 5.659560144  |
|                              | O448                                 | 2.768869796   | 5.100577518   | 4.595948585  |
|                              | O449                                 | 3.177639001   | 8.933156541   | -0.006131996 |
|                              | O450                                 | 0.808407677   | 9.907932885   | -3.031412167 |
|                              | O451                                 | -1.501204918  | 6.982296164   | -1.697447957 |
|                              | O452                                 | -1.310198812  | 7.815957486   | 2.309076406  |
|                              | O453                                 | 1.832688194   | 6.190751261   | 2.040275903  |
|                              | O454                                 | -0.212106694  | 12.258492431  | 2.393293991  |
|                              | O455                                 | -3.823007012  | 13.699883225  | 0.523266401  |
|                              | O456                                 | -3.947051079  | 11.224757437  | -2.012717373 |
|                              | O457                                 | -6.414724258  | 13.070877902  | 3.344342125  |
|                              | O458                                 | -5.585091289  | 6.530301847   | -2.063387039 |
|                              | O459                                 | 3.298580943   | -4.025745251  | -8.548481597 |
|                              | O460                                 | 1.022985437   | -0.392826288  | -8.512520749 |
|                              | O461                                 | 2.718931414   | 4.227798720   | -7.752119408 |
|                              | O462                                 | 7.201504556   | 4.683521594   | -7.785081949 |
|                              | O463                                 | -3.482703122  | -2.561514628  | -9.562053731 |
|                              | O464                                 | -0.115933325  | -6.401562593  | -6.353334107 |
|                              | O465                                 | 1.808659967   | -5.382948439  | -6.834096845 |
|                              | O466                                 | -2.825740459  | 2.452911344   | -8.781839543 |
|                              | O467                                 | 10.661139651  | -4.463171843  | -2.308449297 |
|                              | O468                                 | 13.327341831  | -5.995861471  | -0.567335371 |
|                              | O469                                 | 0.216491927   | -6.539480096  | -0.884840979 |
|                              | O470                                 | 0.774714123   | -8.458852040  | 0.088873520  |
|                              | O471                                 | 6.040104520   | -10.322179832 | -2.756384607 |
|                              | O472                                 | 3.886328590   | -10.392063419 | -3.432198908 |
|                              | O473                                 | 5.513872667   | -5.387700617  | -0.766628879 |
|                              | O474                                 | 5.323239068   | -7.196986466  | 0.562703885  |
|                              | O475                                 | 3.206826109   | -5.762530613  | -1.961635585 |
|                              | O476                                 | 9.154646480   | -5.957311894  | 2.080403805  |
|                              | O477                                 | 7.281247063   | -4.099741541  | 1.033721753  |
|                              | O478                                 | -4.383478881  | 4.405841217   | -3.043027436 |
|                              | O479                                 | 8.748912801   | -9.721120761  | -1.384244593 |
|                              | O480                                 | 7.881665541   | -8.106502501  | 0.820759159  |
|                              | S481                                 | 4.170498840   | 5.597354646   | -1.887714782 |
|                              | S482                                 | 2.632207520   | 2.245293426   | -3.068903126 |
|                              | S483                                 | 2.667499007   | -2.911396021  | -3.442164165 |
|                              | S484                                 | 3.835322379   | 2.475076927   | 0.299994477  |
|                              | S485                                 | 0.312683075   | -2.254565709  | -1.077638669 |
|                              | S486                                 | 4.919440524   | -0.214404806  | -5.018754542 |
|                              | S487                                 | 3.671876609   | -3.344585222  | 0.259190194  |
|                              | S488                                 | 6.173225415   | 2.164893692   | -2.300061232 |
|                              | S489                                 | 6.213996939   | -2.598994293  | -2.336411246 |
|                              | S490                                 | 6.210065324   | -0.509483946  | 0.673713574  |
| <b>22, 47(2)</b><br>Fe1 3.22 | <b>bm2unh2b2n2x263b22n2nas.car_4</b> |               |               |              |
|                              | C1                                   | -6.779387555  | -6.547437036  | -0.530906275 |

|     |       |     |               |               |              |
|-----|-------|-----|---------------|---------------|--------------|
| Fe2 | -0.01 | C2  | -6.814651845  | -7.452806607  | -1.765702395 |
| Fe3 | 2.51  | C3  | -8.084232191  | -5.157959816  | 1.016489186  |
| Fe4 | -2.76 | C4  | -7.582964072  | -5.704462631  | 2.351148322  |
| Fe5 | 2.07  | C5  | -7.267543018  | -7.649436045  | 3.794199524  |
| Fe6 | 1.79  | C6  | -5.739358750  | -7.674860615  | 3.909526988  |
| Fe7 | -2.50 | C7  | -3.603730751  | -7.677720642  | 2.707619033  |
|     |       | C8  | -3.082157501  | -6.262920039  | 2.978948938  |
|     |       | C9  | -3.405803781  | -3.864471686  | 2.675442600  |
|     |       | C10 | -3.613920981  | -3.469691394  | 4.146336644  |
|     |       | C11 | -4.958658472  | -3.671088211  | 6.156636344  |
|     |       | C12 | -4.007588112  | -4.390543894  | 7.124015564  |
|     |       | C13 | -3.065048724  | -6.537238595  | 7.832566932  |
|     |       | C14 | -1.539278328  | -6.587288062  | 7.682854305  |
|     |       | C15 | 0.369279694   | -6.620486421  | 6.129886677  |
|     |       | C16 | 1.136382913   | -5.353861304  | 5.736905521  |
|     |       | C17 | 0.918374697   | -2.933467758  | 5.200034793  |
|     |       | C18 | 0.741415082   | -1.921389117  | 6.346333199  |
|     |       | C19 | 0.324935277   | -2.449186939  | 3.858347315  |
|     |       | C20 | 0.632051952   | -0.969137441  | 3.623435661  |
|     |       | C21 | 0.819110645   | -3.333563091  | 2.708280388  |
|     |       | C22 | -0.813810850  | -0.591343673  | 7.708818319  |
|     |       | C23 | -0.611858366  | -1.202381016  | 9.106539238  |
|     |       | C24 | -2.212421665  | 0.044297268   | 7.525314983  |
|     |       | C25 | -2.537926888  | 1.002352379   | 8.677047902  |
|     |       | C26 | -2.304593015  | 0.777751117   | 6.180695219  |
|     |       | C27 | -1.051366068  | -3.050491916  | 10.616743666 |
|     |       | C28 | 0.384296820   | -3.125587952  | 11.094924189 |
|     |       | C29 | 7.689155231   | -10.897167214 | 1.545979405  |
|     |       | C30 | 8.038546780   | -9.451879140  | 1.198315441  |
|     |       | C31 | 7.943351501   | -7.123207866  | 2.100768837  |
|     |       | C32 | 9.075844058   | -6.759040656  | 3.079149555  |
|     |       | C33 | 6.636118793   | -6.384910589  | 2.436233826  |
|     |       | C34 | 6.769552840   | -4.860891964  | 2.438870808  |
|     |       | C35 | 5.393747534   | -4.192683517  | 2.417191259  |
|     |       | C36 | 5.012163047   | -1.855100827  | 3.239897738  |
|     |       | C37 | 11.210520843  | -5.588041843  | 3.338987712  |
|     |       | C38 | 11.243057537  | -4.110480901  | 3.664603435  |
|     |       | C39 | -4.766206988  | -2.987593315  | -2.343685754 |
|     |       | C40 | -5.388610011  | -1.763244979  | -1.651205321 |
|     |       | C41 | -3.231943190  | -2.870627733  | -2.261035854 |
|     |       | C42 | -2.436636554  | -4.140691302  | -2.624723133 |
|     |       | C43 | -2.083588363  | -4.290611668  | -4.102082055 |
|     |       | C44 | -6.423953264  | 0.421089161   | -2.074507633 |
|     |       | C45 | -7.728762108  | 0.409761230   | -1.270883983 |
|     |       | C46 | -6.525239491  | 1.425564695   | -3.240075249 |
|     |       | C47 | -9.455641512  | -0.933866311  | -0.184621308 |
|     |       | C48 | -9.013785267  | -1.054474607  | 1.280724047  |
|     |       | C49 | -7.159445787  | -1.401022627  | 2.854336830  |
|     |       | C50 | -6.195575698  | -0.323044621  | 3.345119722  |
|     |       | C51 | -4.960356630  | 1.745326448   | 2.861816616  |
|     |       | C52 | -5.631579868  | 2.807186819   | 3.773404541  |
|     |       | C53 | -4.396997909  | 2.507098304   | 1.650751456  |
|     |       | C54 | -3.583220128  | 1.738675432   | 0.653558088  |
|     |       | C55 | -2.768121323  | 0.632231126   | 0.708679218  |
|     |       | C56 | -2.673315204  | 1.417334617   | -1.363634787 |
|     |       | C57 | -7.736924278  | 4.019412624   | 4.243521051  |
|     |       | C58 | -7.707537570  | 3.837248750   | 5.759084606  |
|     |       | C59 | -9.186401987  | 3.957172705   | 3.708886408  |
|     |       | C60 | -9.988797002  | 5.219711070   | 3.834746536  |
|     |       | C61 | -10.087478210 | 6.127692026   | 4.871240805  |
|     |       | C62 | -11.385289228 | 6.739477444   | 3.182581740  |
|     |       | C63 | 8.786904966   | 2.044053830   | 4.241198118  |

|      |              |              |              |
|------|--------------|--------------|--------------|
| C64  | 9.931162556  | 1.124661526  | 3.855240641  |
| C65  | 7.472394854  | 1.328615975  | 3.836539106  |
| C66  | 6.243932344  | 2.124628739  | 4.207276586  |
| C67  | 5.639594272  | 1.996784125  | 5.471001673  |
| C68  | 5.668574673  | 3.020087175  | 3.290037917  |
| C69  | 4.497157165  | 2.732496658  | 5.808611463  |
| C70  | 4.541193450  | 3.771558881  | 3.617615157  |
| C71  | 3.953189952  | 3.623393266  | 4.875587167  |
| C72  | 4.443777093  | 8.137555517  | 0.697757779  |
| C73  | 3.167237463  | 8.973651583  | 0.538690619  |
| C74  | 4.142686291  | 6.657255577  | 0.412552524  |
| C75  | 1.862305624  | 10.436830323 | -0.933980809 |
| C76  | 0.556863247  | 9.670670714  | -1.141079587 |
| C77  | -0.559433093 | 7.539433237  | -1.627400215 |
| C78  | -1.127907990 | 6.993843915  | -0.302442215 |
| C79  | -0.266182966 | 6.423056066  | -2.646579262 |
| C80  | -1.406415468 | 5.452747751  | -2.981782160 |
| C81  | -2.573025395 | 5.989852548  | -3.833535499 |
| C82  | -4.167626255 | 7.731017392  | -3.010455566 |
| C83  | -0.698648048 | 6.163794192  | 1.962604822  |
| C84  | -0.992155491 | 7.268156338  | 2.997571579  |
| C85  | 0.274862037  | 5.155668912  | 2.579573009  |
| C86  | -0.244844707 | 9.395448969  | 3.949025000  |
| C87  | -1.163301013 | 10.615141888 | 3.920777050  |
| C88  | -2.950994302 | 11.838810032 | 2.752374859  |
| C89  | -4.292924225 | 11.813923105 | 3.515786364  |
| C90  | -3.185094739 | 12.126555054 | 1.251416617  |
| C91  | -3.960273991 | 11.006113071 | 0.568727233  |
| C92  | -5.942744496 | 10.428539335 | 4.699843724  |
| C93  | -6.032990036 | 11.174183290 | 6.027229160  |
| C94  | -6.203013030 | 8.914584838  | 4.922796914  |
| C95  | -6.279567820 | 8.138440385  | 3.627558073  |
| C96  | -7.479461153 | 8.085713510  | 2.901146857  |
| C97  | -5.151902621 | 7.493633760  | 3.090453485  |
| C98  | -7.555876259 | 7.427808173  | 1.671012418  |
| C99  | -5.203170661 | 6.848991277  | 1.849730467  |
| C100 | -6.408007072 | 6.828866042  | 1.149652739  |
| C101 | 4.711763214  | -0.932817262 | -9.501757270 |
| C102 | 3.277790884  | -1.073737480 | -9.017182152 |
| C103 | 1.605099710  | -0.204872246 | -7.394591758 |
| C104 | 0.896206279  | 1.140744428  | -7.582017799 |
| C105 | 0.856126811  | 3.501183429  | -6.945095601 |
| C106 | 1.811464268  | 4.686921734  | -6.866557573 |
| C107 | 4.013721314  | 5.588663899  | -6.319043972 |
| C108 | 4.800137656  | 6.006065869  | -7.545832682 |
| C109 | -2.090817340 | -1.539040242 | -9.809970199 |
| C110 | -3.286014064 | -0.726346129 | -9.292118791 |
| C111 | -1.541914916 | -2.442517011 | -8.680098485 |
| C112 | -0.613530365 | -3.537608546 | -9.240987790 |
| C113 | 0.150500951  | -4.216936290 | -8.126519241 |
| C114 | -4.056877679 | 1.282900251  | -8.117700338 |
| C115 | -3.774837138 | 2.741940097  | -8.422860653 |
| C116 | -4.387785485 | 0.986266759  | -6.632657926 |
| C117 | -3.154459139 | 0.831701616  | -5.777345551 |
| C118 | -2.481685478 | 1.948983006  | -5.249492273 |
| C119 | -2.598702425 | -0.442589194 | -5.575388810 |
| C120 | -1.265090182 | 1.789956311  | -4.573704625 |
| C121 | -1.381549611 | -0.600022813 | -4.904308577 |
| C122 | -0.703296791 | 0.519640498  | -4.412538258 |
| C123 | 8.746543151  | -3.519445782 | -5.642960103 |
| C124 | 9.920273365  | -3.658791888 | -4.657085150 |
| C125 | 7.501107474  | -4.273772231 | -5.146832779 |

|       |              |              |              |
|-------|--------------|--------------|--------------|
| C126  | 6.244739538  | -4.053759154 | -5.931519425 |
| C127  | 6.018516095  | -4.337315903 | -7.263560582 |
| C128  | 4.123804620  | -3.680499113 | -6.323516426 |
| C129  | 11.397205986 | -5.091332238 | -3.359807320 |
| C130  | 12.650864136 | -4.405131185 | -3.855918482 |
| C131  | 1.711096955  | -6.833271959 | -1.780610851 |
| C132  | 3.057232559  | -6.286593454 | -1.393985744 |
| C133  | 3.982857567  | -5.981073171 | -2.636373526 |
| C134  | 4.122647880  | -7.266116091 | -3.499154714 |
| C135  | 5.145285800  | -7.106862640 | -4.635134998 |
| C136  | 5.509502924  | -8.399512682 | -5.307528547 |
| C137  | 5.396584802  | -5.656427480 | -2.064571880 |
| C138  | 3.695726427  | 0.515533292  | -2.172258559 |
| Fe139 | 4.067359335  | -0.425307398 | -3.894157575 |
| Fe140 | 2.221232413  | 1.654485630  | -1.091693560 |
| Fe141 | 4.891716579  | 1.617025065  | -1.059131807 |
| Fe142 | 4.023923279  | 2.077056350  | -3.442752520 |
| Fe143 | 3.758784022  | 4.093241790  | -1.725877308 |
| Fe144 | 4.894701787  | -0.919759990 | -1.505676168 |
| Fe145 | 2.176039665  | -0.738452532 | -2.233170079 |
| H146  | -4.843403499 | -7.978355023 | -1.731948800 |
| H147  | -5.185942541 | -6.823446080 | -2.834440835 |
| H148  | -8.813106629 | -6.261149157 | -0.664447297 |
| H149  | -7.533445239 | -7.043633990 | -2.492283832 |
| H150  | -7.235600198 | -8.417707283 | -1.432564999 |
| H151  | -7.495225147 | -4.250949012 | 0.818129769  |
| H152  | -8.211352172 | -7.596769093 | 1.859885312  |
| H153  | -9.137688050 | -4.868766984 | 1.134717699  |
| H154  | -7.641320696 | -8.680618192 | 3.836853523  |
| H155  | -5.562239110 | -7.679265231 | 1.865192310  |
| H156  | -7.642880312 | -7.109955689 | 4.673381768  |
| H157  | -2.347735425 | -3.685658137 | 2.442688907  |
| H158  | -4.519984519 | -5.448750540 | 1.736670723  |
| H159  | -3.255047495 | -8.011792722 | 1.720874073  |
| H160  | -4.850601912 | -2.594105538 | 6.335059388  |
| H161  | -5.409823316 | -4.498032247 | 4.221502271  |
| H162  | -3.162553329 | -8.332551656 | 3.468826451  |
| H163  | -4.014154163 | -3.215548653 | 2.029076769  |
| H164  | -4.303666721 | -6.180691689 | 6.129482199  |
| H165  | -5.990606388 | -3.962851291 | 6.396394488  |
| H166  | 0.587576074  | -4.393554260 | 2.892354407  |
| H167  | 0.335647204  | -3.045163694 | 1.761937848  |
| H168  | 1.906437031  | -3.236373013 | 2.566266954  |
| H169  | -0.768658260 | -2.558606481 | 3.928955374  |
| H170  | -3.438122197 | -7.567705457 | 7.743242352  |
| H171  | -2.140415827 | 0.106226823  | 5.326912132  |
| H172  | -1.798097361 | -2.845654827 | 8.632870256  |
| H173  | -2.544856234 | 0.498006104  | 9.653795463  |
| H174  | 0.228592480  | -0.649676829 | 2.652719015  |
| H175  | 1.713876965  | -0.779538856 | 3.602826076  |
| H176  | 8.793837479  | 2.134563626  | 5.345005014  |
| H177  | -3.301961558 | 1.226182240  | 6.062420167  |
| H178  | -3.529159771 | 1.452123904  | 8.517719674  |
| H179  | -1.559301440 | 1.588570291  | 6.134535208  |
| H180  | -1.799980825 | 1.819028702  | 8.723366481  |
| H181  | -2.957093007 | -0.772040446 | 7.532143840  |
| H182  | -0.051946593 | 0.199556444  | 7.637150607  |
| H183  | -1.318794379 | -1.932348797 | 6.102687373  |
| H184  | 0.181641627  | -0.328549564 | 4.395122035  |
| H185  | 0.478179155  | 4.363447473  | 1.839669305  |
| H186  | -0.225665134 | 4.703607333  | 3.451080985  |
| H187  | 1.910371166  | 5.290318019  | 3.656368286  |

|      |               |              |               |
|------|---------------|--------------|---------------|
| H188 | 2.474913974   | 4.155915566  | 6.018310649   |
| H189 | 4.089349852   | 4.433224246  | 2.877340099   |
| H190 | 6.082169771   | 3.107037642  | 2.283353875   |
| H191 | 6.061311943   | 1.305804399  | 6.206035517   |
| H192 | -0.621951152  | -4.329781613 | 5.717525158   |
| H193 | 0.499674809   | -7.340831107 | 5.308245446   |
| H194 | 0.855983548   | -7.033266641 | 7.022956537   |
| H195 | -1.685040649  | -6.415838599 | 5.617603435   |
| H196 | -3.263181442  | -6.187265960 | 8.853792797   |
| H197 | 4.026565783   | 2.600927978  | 6.787162517   |
| H198 | 2.002611728   | -3.069436203 | 5.099453657   |
| H199 | -1.659112468  | -2.547023308 | 11.386801062  |
| H200 | -1.415611672  | -4.085732515 | 10.522313599  |
| H201 | 1.150552330   | -3.161028712 | 10.285518919  |
| H202 | 12.151015458  | -5.875207887 | 2.844148423   |
| H203 | -0.593755115  | -4.941398037 | -5.346629118  |
| H204 | 2.403224942   | -8.591114770 | -1.399635780  |
| H205 | -1.221841679  | -4.297344113 | -9.752972755  |
| H206 | 0.086546351   | -3.104236536 | -9.969528079  |
| H207 | -2.369351938  | -2.922628026 | -8.135509356  |
| H208 | -3.255306889  | 2.909708022  | -9.395358024  |
| H209 | -2.539365229  | -2.195845271 | -10.571450531 |
| H210 | -2.905357087  | -2.030463223 | -2.893707718  |
| H211 | -3.003690474  | -5.041475985 | -2.331217895  |
| H212 | -2.022823825  | 0.729497198  | -8.526930724  |
| H213 | -4.960523837  | 1.043727174  | -8.712892275  |
| H214 | -0.535460831  | -0.162867916 | -9.825093518  |
| H215 | -0.206759746  | -5.052677780 | -3.630326906  |
| H216 | -1.009475739  | -1.813382925 | -7.949574423  |
| H217 | -0.477171492  | -1.265107162 | -11.047785527 |
| H218 | -6.027208137  | -3.738009821 | -3.798498921  |
| H219 | -2.976437365  | -2.602725479 | -1.226105287  |
| H220 | 1.693447104   | -3.067719567 | -8.561803138  |
| H221 | -1.510425169  | -4.148963795 | -2.033301027  |
| H222 | -4.147069919  | 1.311262989  | 3.460475269   |
| H223 | -2.537219702  | -0.034863599 | 1.531586085   |
| H224 | -8.016690577  | -1.400361178 | 3.541101291   |
| H225 | -7.033996415  | -1.386356280 | 0.720154843   |
| H226 | -7.462987571  | 2.278643291  | 3.018595750   |
| H227 | -9.602810625  | 6.185532148  | 5.839739136   |
| H228 | -7.706201821  | 2.768897468  | 6.086707858   |
| H229 | -9.710034245  | 3.106420322  | 4.180384496   |
| H230 | -7.283330765  | 4.993246435  | 4.001148937   |
| H231 | -12.093246246 | 7.333973042  | 2.611148245   |
| H232 | -3.780126985  | 3.327610211  | 2.052030932   |
| H233 | -5.232449473  | 2.988080928  | 1.116037245   |
| H234 | -11.271697086 | 7.907017960  | 4.959364044   |
| H235 | -9.132625911  | 3.729441416  | 2.632799507   |
| H236 | -6.214277232  | 0.623241250  | 1.511189776   |
| H237 | -6.662225981  | -2.375815367 | 2.969947864   |
| H238 | -10.136968171 | -0.074429166 | -0.238940410  |
| H239 | -2.399874301  | 1.542439020  | -2.409157726  |
| H240 | -10.027497952 | -1.832861162 | -0.448009970  |
| H241 | 9.665426120   | 3.876278165  | 3.977039787   |
| H242 | 8.071161484   | 3.857091782  | 3.613816975   |
| H243 | 0.764427758   | 6.714081470  | 0.485226019   |
| H244 | -1.654746598  | 5.651826061  | 1.789302225   |
| H245 | 0.429860699   | 8.497025630  | 2.160184183   |
| H246 | -3.994567501  | 3.053840921  | -1.005933553  |
| H247 | -5.739800015  | 3.908190906  | -2.060821627  |
| H248 | -5.599400106  | 4.940801699  | -0.854932152  |
| H249 | -5.555972516  | 1.480461486  | -3.755374931  |



|      |              |              |               |
|------|--------------|--------------|---------------|
| H250 | -7.288759220 | 1.090892796  | -3.962274631  |
| H251 | -2.206540487 | 12.289429092 | 0.776117911   |
| H252 | -3.773448330 | 13.049356527 | 1.178062851   |
| H253 | -2.215193834 | 10.163049925 | -0.251195169  |
| H254 | -3.680682885 | 9.235278300  | -0.408841037  |
| H255 | -4.063965639 | 9.633055012  | -3.757645975  |
| H256 | -2.954226150 | 5.185415409  | -4.479328066  |
| H257 | -8.502846388 | 7.383756985  | 1.126911494   |
| H258 | -4.206349373 | 7.477118595  | 3.640372773   |
| H259 | -5.455432208 | 7.387099126  | -1.435518446  |
| H260 | 0.584209103  | 5.825303369  | -2.278904702  |
| H261 | 1.562229005  | 7.885073403  | -1.481668212  |
| H262 | -1.802614793 | 4.984253303  | -2.067746090  |
| H263 | -8.000413261 | -1.573023663 | -1.630358740  |
| H264 | 2.055371639  | 11.026830473 | -1.840255995  |
| H265 | -5.915440772 | -1.191256899 | -3.494948519  |
| H266 | 0.076284746  | 6.908935117  | -3.575366030  |
| H267 | -4.306177911 | 6.398393164  | 1.420658183   |
| H268 | -7.492866702 | 2.602363320  | -2.021964560  |
| H269 | 1.672398461  | 11.141246830 | -0.111761113  |
| H270 | -3.239763875 | 8.447125353  | -4.703164425  |
| H271 | -5.674817404 | 8.887320897  | -2.259442102  |
| H272 | -4.474857467 | -3.431200749 | -4.331976537  |
| H273 | -5.068144948 | -3.851830735 | -1.721793516  |
| H274 | -8.378050236 | 8.560170229  | 3.302521993   |
| H275 | -5.683498825 | 0.816290500  | -1.359216493  |
| H276 | -1.342403057 | 8.207610819  | -2.011439312  |
| H277 | -2.214254689 | 6.778330267  | -4.506308737  |
| H278 | -0.939769390 | 4.643239107  | -3.560266988  |
| H279 | -4.200221131 | 5.777471199  | -2.464627631  |
| H280 | -0.453519024 | 8.867602699  | 4.891325429   |
| H281 | -2.093224242 | 9.937465774  | 2.218092500   |
| H282 | -2.396517543 | 12.688007530 | 3.177693139   |
| H283 | 0.782655716  | 9.779446376  | 4.002634607   |
| H284 | -4.016255361 | 9.839985388  | 3.955446863   |
| H285 | 5.041598284  | 0.110695440  | -9.390678445  |
| H286 | 5.327165861  | -1.537494801 | -8.803386710  |
| H287 | 8.521516153  | -2.443291159 | -5.671483943  |
| H288 | 5.805378777  | -1.463986842 | -11.139556968 |
| H289 | 4.376852232  | -2.256795037 | -11.010549710 |
| H290 | 5.073579493  | 6.094311998  | 0.557021526   |
| H291 | 4.276491343  | 8.105237981  | 2.724645007   |
| H292 | 3.725258149  | 9.480584641  | -1.369116960  |
| H293 | 3.397909685  | 6.288432632  | 1.132517940   |
| H294 | 5.333876912  | 9.227195619  | 2.182304304   |
| H295 | 4.716975165  | 5.335875658  | -5.510682320  |
| H296 | 5.192930220  | 8.483897877  | -0.031626708  |
| H297 | 6.268660154  | -6.736937848 | 3.414596997   |
| H298 | 8.243153579  | -6.876511680 | 1.075147204   |
| H299 | 3.442960455  | 3.536876590  | -6.282464346  |
| H300 | 4.762684180  | 0.146055463  | 3.602612762   |
| H301 | 0.314935078  | 3.578402605  | -7.897180291  |
| H302 | -0.951876850 | -1.595326282 | -4.770269353  |
| H303 | 0.111712634  | 3.663190093  | -6.148301566  |
| H304 | 4.791585936  | -4.478927849 | 3.290267626   |
| H305 | 2.140035096  | 1.927336848  | -6.163624890  |
| H306 | 4.835085717  | -4.525287240 | 1.527805648   |
| H307 | 5.898948774  | -6.693804721 | 1.677379187   |
| H308 | 7.321109451  | -4.524507823 | 1.547896165   |
| H309 | 7.334210792  | -4.520134299 | 3.321881253   |
| H310 | -4.979783386 | 0.060520540  | -6.604276299  |
| H311 | 7.353211524  | -8.983888605 | 3.015549310   |

|       |              |               |              |
|-------|--------------|---------------|--------------|
| H312  | 6.821238266  | -11.161568040 | 0.922450633  |
| H313  | 0.251508741  | 0.400428262   | -3.895251490 |
| H314  | 8.175846503  | -11.330328193 | 3.499926189  |
| H315  | 6.694354161  | -11.873286266 | 3.061134156  |
| H316  | 5.757225163  | -2.341965859  | 1.437648324  |
| H317  | -0.727108613 | 2.653275119   | -4.176482589 |
| H318  | -3.118756947 | -1.325881126  | -5.952590364 |
| H319  | 9.160431911  | -7.828577037  | -3.352034943 |
| H320  | 7.726168351  | -5.355519945  | -5.148415889 |
| H321  | 7.746593748  | -6.770137495  | -1.642680152 |
| H322  | 8.547506661  | -8.373040710  | -4.660208330 |
| H323  | 4.523139850  | 5.484050459   | -8.493501532 |
| H324  | 7.091170371  | -3.752196636  | -1.203109204 |
| H325  | 3.584834191  | -6.974191893  | -0.716632291 |
| H326  | 3.618788230  | 0.381952214   | -7.613268892 |
| H327  | 4.435231192  | -8.093810463  | -2.843432788 |
| H328  | 4.180965551  | -4.228691298  | -8.361630363 |
| H329  | 3.074483406  | -3.437091157  | -6.210757013 |
| H330  | 8.531042017  | -11.516848124 | 1.192712158  |
| H331  | 5.166462125  | -0.264397505  | 1.938030918  |
| H332  | 9.234482661  | -4.350152137  | -0.278805697 |
| H333  | 7.640415367  | -2.361987442  | -0.787973777 |
| H334  | 9.998194557  | -5.675185878  | 1.560282378  |
| H335  | 4.956012154  | -3.136645511  | 4.853081042  |
| H336  | 4.767795957  | -9.869958044  | -6.238026471 |
| H337  | 4.734970612  | -6.419791252  | -5.389957632 |
| H338  | 6.080900418  | -6.675063308  | -4.262671748 |
| H339  | 3.139487332  | -7.513121111  | -3.924580699 |
| H340  | 1.745822767  | -0.432471706  | -6.325580244 |
| H341  | -2.902643017 | 2.945893916   | -5.403551335 |
| H342  | -5.022633626 | 1.811492218   | -6.275023818 |
| H343  | 2.902795231  | -5.328486095  | -0.881592950 |
| H344  | 9.548196591  | -5.797132485  | -0.740436011 |
| H345  | 8.689121880  | -7.841525418  | -1.034522673 |
| H346  | 4.290332258  | -1.574207418  | 5.140556526  |
| H347  | 6.688036089  | -4.682857273  | -8.041423602 |
| H348  | 7.310351734  | -4.000068829  | -4.101416183 |
| H349  | 0.983001785  | -0.977694238  | -7.851298313 |
| H350  | 3.426599925  | 6.460990012   | -5.989091602 |
| H351  | 7.460747406  | 0.350198423   | 4.339959699  |
| H352  | 7.486270709  | 1.148102534   | 2.749558219  |
| H353  | 9.917566824  | -3.362129908  | -7.320726017 |
| H354  | 9.460801420  | -4.898921925  | -6.998288182 |
| H355  | 11.615292976 | -6.169842246  | -3.304792556 |
| H356  | 9.750621985  | -5.749413346  | -4.537380878 |
| H357  | 12.705515149 | -4.265988233  | -4.962479944 |
| H358  | 11.164895888 | -4.745521643  | -2.339807916 |
| H359  | 10.265053142 | 1.231798407   | 2.794835402  |
| H360  | -5.057311452 | 11.496042339  | 6.461384279  |
| H361  | 11.158166015 | -6.125385114  | 4.302339028  |
| H362  | 10.252414783 | -3.595197537  | 3.640926815  |
| H363  | -6.731731885 | 10.836226921  | 4.047193597  |
| H364  | -5.410151447 | 8.505190059   | 5.568744724  |
| H365  | -7.149823052 | 8.830015600   | 5.475432384  |
| H366  | -7.352838955 | 6.198237000   | -0.430932695 |
| H367  | 0.404365630  | -1.400677185  | -0.099643687 |
| H368  | 2.556486780  | -2.536418482  | -0.644537434 |
| H369  | -1.494270756 | -0.258694998  | -0.845079123 |
| H370  | 1.301414898  | 0.689490938   | -2.021108283 |
| Mo371 | 4.355160427  | -3.033613939  | -3.194018044 |
| N372  | 2.303570410  | -0.191221404  | 1.200286401  |
| N373  | 2.257957492  | 0.477273852   | 0.296004513  |

|      |               |               |               |
|------|---------------|---------------|---------------|
| N374 | -5.540870661  | -7.689782275  | -2.422707534  |
| N375 | -7.988795608  | -6.096172003  | -0.092360915  |
| N376 | -7.754584235  | -7.031261705  | 2.571469885   |
| N377 | -5.054243761  | -7.777864506  | 2.743114005   |
| N378 | -3.766272013  | -5.246278941  | 2.394703129   |
| N379 | -4.711201473  | -3.977432813  | 4.757435604   |
| N380 | -3.795818153  | -5.710849517  | 6.883662461   |
| N381 | -1.046356070  | -6.455615389  | 6.418382470   |
| N382 | 0.383397744   | -4.234995696  | 5.589147463   |
| N383 | -0.540149207  | -1.575196007  | 6.660125184   |
| N384 | -1.164133650  | -2.424718727  | 9.314946711   |
| N385 | 7.342284911   | -11.090931206 | 2.959012106   |
| N386 | 7.720941745   | -8.561496884  | 2.155794178   |
| N387 | 5.484047319   | -2.732478701  | 2.343923506   |
| N388 | 4.616548177   | -2.261467850  | 4.468356348   |
| N389 | 4.882807865   | -0.570583369  | 2.891826767   |
| N390 | 10.057778748  | -5.984167853  | 2.554503157   |
| N391 | -5.244209092  | -3.084603652  | -3.728676885  |
| N392 | -0.866417199  | -4.801226303  | -4.368855716  |
| N393 | -5.969824277  | -0.882090214  | -2.509851893  |
| N394 | -8.373398399  | -0.766137040  | -1.135833462  |
| N395 | -7.679510088  | -1.244512129  | 1.506615592   |
| N396 | -5.870392970  | 0.676517347   | 2.466887760   |
| N397 | -3.507694219  | 2.197308650   | -0.656765524  |
| N398 | -2.223437719  | 0.456077421   | -0.551063613  |
| N399 | -6.973166186  | 2.946456674   | 3.608992254   |
| N400 | -10.804049584 | 5.613709217   | 2.785288838   |
| N401 | -10.976767723 | 7.087116483   | 4.435425228   |
| N402 | 8.935834714   | 3.315458550   | 3.529971504   |
| N403 | 5.024470048   | 8.261172662   | 2.040489919   |
| N404 | 3.033903873   | 9.639283166   | -0.640139092  |
| N405 | 0.640187353   | 8.354755816   | -1.445645957  |
| N406 | -3.716077663  | 6.480152324   | -3.052657137  |
| N407 | -3.692905191  | 8.691160639   | -3.829534635  |
| N408 | -5.070874955  | 8.091828605   | -2.068676866  |
| N409 | -0.237461911  | 6.662826482   | 0.671799927   |
| N410 | -0.332302888  | 8.451760446   | 2.843430909   |
| N411 | -2.123071171  | 10.650829759  | 2.948516041   |
| N412 | -3.194928897  | 10.020505542  | 0.023793489   |
| N413 | -4.647651176  | 10.628920394  | 4.069593174   |
| N414 | 4.817930187   | -1.338259880  | -10.906168618 |
| N415 | 2.902974104   | -0.206883485  | -8.059110533  |
| N416 | 1.409654666   | 2.161638942   | -6.861160003  |
| N417 | 3.115030924   | 4.469985490   | -6.551254192  |
| N418 | -1.112384105  | -0.685690151  | -10.495531688 |
| N419 | -2.999392140  | 0.457430956   | -8.680993388  |
| N420 | 9.125008729   | -3.930700651  | -7.008404099  |
| N421 | 5.041687528   | -3.633444715  | -5.361699119  |
| N422 | 4.680335507   | -4.096159986  | -7.486843244  |
| N423 | 10.280800733  | -4.916884250  | -4.275607736  |
| N424 | -0.261718315  | 2.983264057   | -0.226085658  |
| N425 | 0.685970811   | 2.459182865   | -0.547197322  |
| O426 | -5.725192787  | -6.276341689  | 0.073483560   |
| O427 | -7.057358919  | -4.950224549  | 3.186117325   |
| O428 | -5.189083020  | -7.633078294  | 5.022013359   |
| O429 | -2.094893756  | -6.065267667  | 3.704674057   |
| O430 | -2.815195165  | -2.722557920  | 4.733600851   |
| O431 | -3.504283586  | -3.791722577  | 8.089386717   |
| O432 | -0.833522867  | -6.782426008  | 8.681468969   |
| O433 | 2.361755774   | -5.406607541  | 5.554465270   |
| O434 | 1.723124533   | -1.447503721  | 6.938541299   |
| O435 | 0.030005311   | -0.613291557  | 9.991645143   |

|                  |                                      |              |              |             |
|------------------|--------------------------------------|--------------|--------------|-------------|
| O436             | 0.692430974                          | -3.214305913 | 12.274528691 |             |
| O437             | 8.551555796                          | -9.190277753 | 0.089512266  |             |
| O438             | 9.058271019                          | -7.168757368 | 4.253388013  |             |
| O439             | 12.266203987                         | -3.511073055 | 3.955437760  |             |
| O440             | -5.366496437                         | -1.592495703 | -0.414329481 |             |
| O441             | -2.880208827                         | -3.972016625 | -5.015435425 |             |
| O442             | -8.122831221                         | 1.467818579  | -0.733888685 |             |
| O443             | -6.844206339                         | 2.741094874  | -2.759554048 |             |
| O444             | -9.865624656                         | -0.987951560 | 2.174015850  |             |
| O445             | -5.756444332                         | -0.362866794 | 4.497239334  |             |
| O446             | -4.959319358                         | 3.521839842  | 4.521436979  |             |
| O447             | -7.717516818                         | 4.754065680  | 6.562222485  |             |
| O448             | 10.445316211                         | 0.311764097  | 4.610086495  |             |
| O449             | 2.817974993                          | 4.369315754  | 5.131161973  |             |
| O450             | 2.298460836                          | 9.037737753  | 1.429165979  |             |
| O451             | -0.521015289                         | 10.293041923 | -1.049403657 |             |
| O452             | -2.354565304                         | 6.866707315  | -0.162465853 |             |
| O453             | -1.771315673                         | 7.041996142  | 3.934238095  |             |
| O454             | 1.475320214                          | 5.830044174  | 2.964540458  |             |
| O455             | -1.033758538                         | 11.501963796 | 4.773335380  |             |
| O456             | -4.987884584                         | 12.835157068 | 3.605583665  |             |
| O457             | -5.199918325                         | 10.958568164 | 0.594588451  |             |
| O458             | -7.090807452                         | 11.384236133 | 6.597494029  |             |
| O459             | -6.429895458                         | 6.207802080  | -0.111420293 |             |
| O460             | 2.534678243                          | -1.977196044 | -9.480929495 |             |
| O461             | -0.069584759                         | 1.267859074  | -8.365720741 |             |
| O462             | 1.348813186                          | 5.822125585  | -7.065614927 |             |
| O463             | 5.670522389                          | 6.861657089  | -7.516551250 |             |
| O464             | -4.449609301                         | -1.145774726 | -9.411297850 |             |
| O465             | -0.329951040                         | -5.085670551 | -7.404656691 |             |
| O466             | 1.409224406                          | -3.785796647 | -7.911703547 |             |
| O467             | -4.107936649                         | 3.678336110  | -7.711363319 |             |
| O468             | 10.570598927                         | -2.670577387 | -4.270350652 |             |
| O469             | 13.579875836                         | -4.088223553 | -3.126572680 |             |
| O470             | 0.749790868                          | -6.176067543 | -2.148524897 |             |
| O471             | 1.569703685                          | -8.197379930 | -1.721046471 |             |
| O472             | 6.644462156                          | -8.859826050 | -5.405687957 |             |
| O473             | 4.432790746                          | -9.043513560 | -5.829119586 |             |
| O474             | 5.846224257                          | -4.475512798 | -2.342425031 |             |
| O475             | 6.038687923                          | -6.525005557 | -1.431175820 |             |
| O476             | 3.479241967                          | -4.923383020 | -3.370961105 |             |
| O477             | 9.897502359                          | -5.074666789 | -0.153412761 |             |
| O478             | 7.703322757                          | -3.310305364 | -0.561348763 |             |
| O479             | -5.088373637                         | 4.462036263  | -1.550003388 |             |
| O480             | 9.410401562                          | -8.140429717 | -4.258689220 |             |
| O481             | 8.693954322                          | -7.084809785 | -1.677684845 |             |
| S482             | 3.514661463                          | 6.370853350  | -1.306315762 |             |
| S483             | 2.130365112                          | 3.194869161  | -2.981850867 |             |
| S484             | 2.411842061                          | -1.932569777 | -4.096691635 |             |
| S485             | 3.636073318                          | 2.949433836  | 0.280284090  |             |
| S486             | 0.173296917                          | -1.706407416 | -1.402612495 |             |
| S487             | 4.271791349                          | 1.181939479  | -5.453051329 |             |
| S488             | 3.878798905                          | -2.880107594 | -0.748064874 |             |
| S489             | 5.708218041                          | 3.196051695  | -2.528775556 |             |
| S490             | 6.044883645                          | -1.387240994 | -3.367641870 |             |
| S491             | 6.188950106                          | 0.108455071  | -0.034636813 |             |
| <b>22, 35(2)</b> | <b>bm2unh2b2n2x2n2n263b235.car_4</b> |              |              |             |
| Fe1 3.23         | C1                                   | -7.529752300 | -5.594093210 | 1.103990851 |
| Fe2 0.11         | C2                                   | -7.723797263 | -6.760668764 | 0.129256979 |
| Fe3 -2.44        | C3                                   | -8.600130065 | -3.722448497 | 2.277979287 |
|                  | C4                                   | -8.141673322 | -4.000577347 | 3.708595475 |

|            |              |     |               |               |              |
|------------|--------------|-----|---------------|---------------|--------------|
| <b>Fe4</b> | <b>2.99</b>  | C5  | -8.014510901  | -5.584491816  | 5.561717110  |
| <b>Fe5</b> | <b>-2.18</b> | C6  | -6.494675516  | -5.749029083  | 5.678987191  |
| <b>Fe6</b> | <b>-1.58</b> | C7  | -4.409995949  | -6.308900823  | 4.520652925  |
| <b>Fe7</b> | <b>2.53</b>  | C8  | -3.725623782  | -4.942663157  | 4.412362432  |
|            |              | C9  | -3.787487084  | -2.675807637  | 3.522510353  |
|            |              | C10 | -3.877665267  | -1.905701671  | 4.849123006  |
|            |              | C11 | -5.131107038  | -1.446211802  | 6.877313507  |
|            |              | C12 | -4.236281845  | -2.034609712  | 7.978294314  |
|            |              | C13 | -3.524424848  | -4.047462968  | 9.173672564  |
|            |              | C14 | -2.017650947  | -4.290076814  | 9.013419125  |
|            |              | C15 | -0.201968865  | -4.940745466  | 7.484303592  |
|            |              | C16 | 0.686678795   | -3.885869833  | 6.816398080  |
|            |              | C17 | 0.719612643   | -1.640584901  | 5.746943678  |
|            |              | C18 | 0.682035582   | -0.400020283  | 6.654407131  |
|            |              | C19 | 0.160841312   | -1.393404559  | 4.327445688  |
|            |              | C20 | 0.654991221   | -0.055855131  | 3.770349668  |
|            |              | C21 | 0.515287494   | -2.572769187  | 3.414324776  |
|            |              | C22 | -0.655025028  | 1.398494075   | 7.649444024  |
|            |              | C23 | -0.466610885  | 1.109522164   | 9.149114689  |
|            |              | C24 | -1.977346570  | 2.140812517   | 7.338374367  |
|            |              | C25 | -2.140706008  | 3.377304806   | 8.229875003  |
|            |              | C26 | -2.036893378  | 2.542517025   | 5.857405155  |
|            |              | C27 | -1.013031652  | -0.297358629  | 11.046856265 |
|            |              | C28 | 0.418168489   | -0.385502338  | 11.536080740 |
|            |              | C29 | 6.363949602   | -11.081561524 | 4.133071279  |
|            |              | C30 | 6.876442898   | -9.825869491  | 3.434922128  |
|            |              | C31 | 7.122523102   | -7.357409838  | 3.744683186  |
|            |              | C32 | 8.325897135   | -6.896887422  | 4.587710716  |
|            |              | C33 | 5.913679707   | -6.417882594  | 3.897784060  |
|            |              | C34 | 6.202333308   | -4.971088403  | 3.491894491  |
|            |              | C35 | 4.902644555   | -4.190376171  | 3.290443342  |
|            |              | C36 | 4.893987798   | -1.688631790  | 3.500439340  |
|            |              | C37 | 10.599120165  | -5.985282195  | 4.515520035  |
|            |              | C38 | 10.779128146  | -4.481488257  | 4.521149171  |
|            |              | C39 | -5.170085227  | -2.854525824  | -1.557467695 |
|            |              | C40 | -5.621399469  | -1.437689704  | -1.163324920 |
|            |              | C41 | -3.631525614  | -2.911942010  | -1.527712209 |
|            |              | C42 | -3.010093835  | -4.321741445  | -1.582583294 |
|            |              | C43 | -2.735578790  | -4.862201043  | -2.983076513 |
|            |              | C44 | -6.403525480  | 0.703573844   | -2.078292896 |
|            |              | C45 | -7.660677736  | 1.043843334   | -1.271101722 |
|            |              | C46 | -6.451652767  | 1.403631716   | -3.451882472 |
|            |              | C47 | -9.513005969  | 0.216236521   | 0.088979444  |
|            |              | C48 | -9.036621966  | 0.389686397   | 1.537878113  |
|            |              | C49 | -7.178839088  | 0.183538991   | 3.133868250  |
|            |              | C50 | -6.091313912  | 1.234842578   | 3.344319076  |
|            |              | C51 | -4.631642892  | 2.946559500   | 2.356839755  |
|            |              | C52 | -5.125988202  | 4.284295222   | 2.968139955  |
|            |              | C53 | -4.008259589  | 3.291886544   | 0.994375919  |
|            |              | C54 | -3.322178113  | 2.199703481   | 0.228236952  |
|            |              | C55 | -2.640706414  | 1.050756010   | 0.556691092  |
|            |              | C56 | -2.495760005  | 1.293329174   | -1.643342329 |
|            |              | C57 | -7.044374886  | 5.834587215   | 3.171823835  |
|            |              | C58 | -6.960001514  | 6.008291149   | 4.686611833  |
|            |              | C59 | -8.518099201  | 5.832075994   | 2.702716753  |
|            |              | C60 | -9.153553972  | 7.181158710   | 2.532240030  |
|            |              | C61 | -9.148438749  | 8.291738571   | 3.354177572  |
|            |              | C62 | -10.338912538 | 8.689662144   | 1.528692720  |
|            |              | C63 | 9.129005689   | 1.915879874   | 3.538128891  |
|            |              | C64 | 10.119769695  | 0.782173764   | 3.343929853  |
|            |              | C65 | 7.714661732   | 1.313722736   | 3.341630297  |
|            |              | C66 | 6.613163660   | 2.330948898   | 3.529395991  |

|      |              |              |              |
|------|--------------|--------------|--------------|
| C67  | 6.022273190  | 2.551615294  | 4.786698576  |
| C68  | 6.148344538  | 3.091065482  | 2.441127687  |
| C69  | 5.000876846  | 3.493948439  | 4.955862946  |
| C70  | 5.144444985  | 4.044925365  | 2.597779525  |
| C71  | 4.565947818  | 4.240358683  | 3.853735036  |
| C72  | 5.380842533  | 7.448363377  | -1.309635859 |
| C73  | 4.220301268  | 8.385283341  | -1.668283798 |
| C74  | 4.865561646  | 6.005891745  | -1.168307306 |
| C75  | 3.047219638  | 9.588522229  | -3.455323888 |
| C76  | 1.643769342  | 8.983793582  | -3.442034301 |
| C77  | 0.257441114  | 6.951733930  | -3.377851132 |
| C78  | -0.305710773 | 6.812468050  | -1.949393338 |
| C79  | 0.381806918  | 5.592955512  | -4.090996803 |
| C80  | -0.875335036 | 4.719828306  | -4.173016484 |
| C81  | -1.993938081 | 5.172978889  | -5.130724185 |
| C82  | -3.331557684 | 7.247386539  | -4.720603130 |
| C83  | 0.133628412  | 6.494073872  | 0.439732358  |
| C84  | 0.004744143  | 7.849820863  | 1.162962816  |
| C85  | 1.016416489  | 5.568270634  | 1.282122826  |
| C86  | 1.043221268  | 10.030495334 | 1.555683914  |
| C87  | 0.257767261  | 11.305620592 | 1.260300125  |
| C88  | -1.433044726 | 12.417171508 | -0.144549459 |
| C89  | -2.737182547 | 12.732040798 | 0.616833758  |
| C90  | -1.698548654 | 12.349404716 | -1.667037997 |
| C91  | -2.614667671 | 11.184973338 | -2.026636825 |
| C92  | -4.496953410 | 11.864595303 | 2.093938541  |
| C93  | -4.444087000 | 12.897858120 | 3.214991315  |
| C94  | -4.925780497 | 10.488525778 | 2.670198376  |
| C95  | -5.138755357 | 9.442661000  | 1.599366160  |
| C96  | -6.373460173 | 9.342078612  | 0.938746131  |
| C97  | -4.106811699 | 8.571539355  | 1.210986183  |
| C98  | -6.572803091 | 8.414941940  | -0.086884843 |
| C99  | -4.279742743 | 7.652692639  | 0.171033485  |
| C100 | -5.514596216 | 7.591073780  | -0.471549354 |
| C101 | 4.238419526  | -3.723933571 | -9.049459842 |
| C102 | 2.812075029  | -3.542378028 | -8.557981028 |
| C103 | 1.314416482  | -2.102071094 | -7.197094688 |
| C104 | 0.749307750  | -0.775023446 | -7.712608716 |
| C105 | 0.982060960  | 1.664556123  | -7.640251367 |
| C106 | 2.076805918  | 2.713333152  | -7.816709656 |
| C107 | 4.385501118  | 3.427335164  | -7.456020966 |
| C108 | 5.193416723  | 3.451150266  | -8.737710773 |
| C109 | -2.575304692 | -3.560847628 | -9.175211113 |
| C110 | -3.647581316 | -2.504286866 | -8.875129174 |
| C111 | -2.086103238 | -4.207259692 | -7.858174593 |
| C112 | -1.330489372 | -5.520411269 | -8.134845737 |
| C113 | -0.595391030 | -5.993732722 | -6.901410796 |
| C114 | -4.131793007 | -0.199206001 | -8.197466055 |
| C115 | -3.696275919 | 1.105492834  | -8.836908181 |
| C116 | -4.440946034 | -0.107030516 | -6.681372048 |
| C117 | -3.203829086 | -0.182818297 | -5.820398360 |
| C118 | -2.413462139 | 0.952391158  | -5.568507155 |
| C119 | -2.768886958 | -1.424670437 | -5.324734363 |
| C120 | -1.206233747 | 0.835037597  | -4.869264974 |
| C121 | -1.560884685 | -1.541520536 | -4.629270433 |
| C122 | -0.768049067 | -0.410460174 | -4.408463181 |
| C123 | 8.099172817  | -5.773188974 | -4.617774386 |
| C124 | 9.285160608  | -5.827611580 | -3.639781331 |
| C125 | 6.792640635  | -6.268338151 | -3.975025038 |
| C126 | 5.550612162  | -6.105633445 | -4.799352338 |
| C127 | 5.270267916  | -6.701427478 | -6.012934337 |
| C128 | 3.480620300  | -5.605111187 | -5.304113771 |

|       |              |               |              |
|-------|--------------|---------------|--------------|
| C129  | 10.631337969 | -7.097516625  | -2.059207449 |
| C130  | 11.936757611 | -6.783063797  | -2.756459122 |
| C131  | 0.803786580  | -7.192310247  | -0.102823348 |
| C132  | 2.213110330  | -6.711410022  | 0.108994489  |
| C133  | 3.123430994  | -6.840408289  | -1.174194922 |
| C134  | 3.065151123  | -8.302405981  | -1.699078585 |
| C135  | 4.058396548  | -8.562234251  | -2.842565992 |
| C136  | 4.240890331  | -10.017882681 | -3.165761323 |
| C137  | 4.590906558  | -6.583510106  | -0.707791561 |
| C138  | 3.655814651  | -0.504846056  | -2.256106682 |
| Fe139 | 3.893667084  | -1.813620212  | -3.759453242 |
| Fe140 | 2.351095221  | 0.943108593   | -1.340529195 |
| Fe141 | 5.036843102  | 0.708704806   | -1.439896086 |
| Fe142 | 3.995260613  | 0.741231657   | -3.823314256 |
| Fe143 | 4.143160129  | 3.054835653   | -2.435194959 |
| Fe144 | 4.749330497  | -1.853952974  | -1.318414018 |
| Fe145 | 2.077101454  | -1.622053275  | -1.990747261 |
| H146  | -5.818159178 | -7.475586147  | 0.251640629  |
| H147  | -6.096639786 | -6.597496038  | -1.096942247 |
| H148  | -9.516837258 | -5.090509884  | 0.914985413  |
| H149  | -8.428906762 | -6.459649227  | -0.661029632 |
| H150  | -8.226083968 | -7.561900597  | 0.699523310  |
| H151  | -7.902607294 | -2.975653001  | 1.873541118  |
| H152  | -8.995061015 | -5.867246407  | 3.664341590  |
| H153  | -9.601140557 | -3.271959823  | 2.313164764  |
| H154  | -8.497651941 | -6.530884521  | 5.839077245  |
| H155  | -6.380420338 | -6.316003979  | 3.708436109  |
| H156  | -8.310211636 | -4.820477559  | 6.292295325  |
| H157  | -2.726434141 | -2.690600222  | 3.239211458  |
| H158  | -5.113784835 | -4.298872097  | 3.019931353  |
| H159  | -4.128879298 | -6.926588024  | 3.656723754  |
| H160  | -4.871712343 | -0.384443757  | 6.780867934  |
| H161  | -5.766534437 | -2.664846536  | 5.220452901  |
| H162  | -4.023909913 | -6.786672399  | 5.429075155  |
| H163  | -4.341550539 | -2.137028179  | 2.740085160  |
| H164  | -4.796183901 | -3.959538592  | 7.458780454  |
| H165  | -6.179977416 | -1.525185968  | 7.194666335  |
| H166  | 0.173745399  | -3.527566265  | 3.842255541  |
| H167  | 0.037672791  | -2.454556913  | 2.429249476  |
| H168  | 1.602065327  | -2.632762296  | 3.249784813  |
| H169  | -0.936092600 | -1.342598102  | 4.409813786  |
| H170  | -4.000964443 | -5.025896503  | 9.332100476  |
| H171  | -2.033614305 | 1.672203834   | 5.185741398  |
| H172  | -1.773359195 | -0.503532952  | 9.068045734  |
| H173  | -2.161049780 | 3.122909191   | 9.298635530  |
| H174  | 0.284366028  | 0.089098375   | 2.746328271  |
| H175  | 1.752050356  | -0.018259313  | 3.727910985  |
| H176  | 9.210384086  | 2.250285237   | 4.590533301  |
| H177  | -2.958577585 | 3.108837965   | 5.659373552  |
| H178  | -3.080177426 | 3.890548783   | 7.979823445  |
| H179  | -1.179327482 | 3.184691955   | 5.596386651  |
| H180  | -1.312297180 | 4.084781280   | 8.067765563  |
| H181  | -2.810878658 | 1.446450014   | 7.548291015  |
| H182  | 0.188895622  | 2.055413376   | 7.385769238  |
| H183  | -1.361979016 | -0.178413910  | 6.362752844  |
| H184  | 0.303937658  | 0.791539491   | 4.376077867  |
| H185  | 1.111449219  | 4.602688340   | 0.757276590  |
| H186  | 0.494903078  | 5.400250783   | 2.237591492  |
| H187  | 2.673009548  | 5.797754183   | 2.309967434  |
| H188  | 3.192874756  | 5.188440595   | 4.848632412  |
| H189  | 4.778769290  | 4.608571480   | 1.738968621  |
| H190  | 6.554617132  | 2.910013297   | 1.443847858  |

|      |               |              |               |
|------|---------------|--------------|---------------|
| H191 | 6.358253570   | 1.971603775  | 5.651820237   |
| H192 | -0.954393348  | -2.709162666 | 6.554625374   |
| H193 | -0.188870736  | -5.828294284 | 6.834117892   |
| H194 | 0.274991418   | -5.211396802 | 8.435605465   |
| H195 | -2.246042925  | -4.643605412 | 6.978486542   |
| H196 | -3.647623205  | -3.453990840 | 10.088451632  |
| H197 | 4.540424088   | 3.640689714  | 5.937151167   |
| H198 | 1.778974794   | -1.919059327 | 5.680713509   |
| H199 | -1.556337464  | 0.430996507  | 11.671949734  |
| H200 | -1.470491592  | -1.287535636 | 11.204648545  |
| H201 | 1.163202174   | -0.690681078 | 10.764493446  |
| H202 | 11.478709999  | -6.454004672 | 4.048804385   |
| H203 | -1.361868291  | -5.946969006 | -4.049069657  |
| H204 | 1.328506774   | -8.848837124 | 0.734925512   |
| H205 | -2.049605904  | -6.298597194 | -8.428168020  |
| H206 | -0.619298586  | -5.377919702 | -8.962006855  |
| H207 | -2.938514688  | -4.417433120 | -7.193861202  |
| H208 | -3.191046856  | 0.978231217  | -9.823368316  |
| H209 | -3.124077078  | -4.332454656 | -9.737535410  |
| H210 | -3.240100805  | -2.296527344 | -2.352610232  |
| H211 | -3.666436941  | -5.051296868 | -1.075599497  |
| H212 | -2.194220826  | -1.077400153 | -8.483622213  |
| H213 | -5.080145733  | -0.455399710 | -8.710863470  |
| H214 | -0.884716728  | -2.419512494 | -9.566577588  |
| H215 | -0.921798737  | -5.664479910 | -2.364825556  |
| H216 | -1.444874479  | -3.486493050 | -7.327976736  |
| H217 | -0.985302534  | -3.806663923 | -10.448991482 |
| H218 | -6.579714157  | -3.748167465 | -2.776179963  |
| H219 | -3.302892242  | -2.439673424 | -0.591389920  |
| H220 | 1.039058633   | -5.160259428 | -7.626036508  |
| H221 | -2.067019555  | -4.303669163 | -1.019035447  |
| H222 | -3.864989017  | 2.573958078  | 3.050784837   |
| H223 | -2.472137802  | 0.576090414  | 1.515914567   |
| H224 | -8.001992880  | 0.430447991  | 3.818175259   |
| H225 | -7.138191116  | -0.324189626 | 1.059001475   |
| H226 | -7.044997628  | 3.832219088  | 2.400089305   |
| H227 | -8.674954765  | 8.491885217  | 4.308911622   |
| H228 | -7.087401211  | 5.054143236  | 5.256004393   |
| H229 | -9.113357191  | 5.194725132  | 3.379852959   |
| H230 | -6.491055770  | 6.655687110  | 2.691019766   |
| H231 | -10.960745374 | 9.231226135  | 0.819764617   |
| H232 | -3.280994637  | 4.099044768  | 1.180047580   |
| H233 | -4.788318283  | 3.728486839  | 0.349156363   |
| H234 | -10.097503211 | 10.180996355 | 3.029748252   |
| H235 | -8.545609939  | 5.347143668  | 1.714859684   |
| H236 | -6.075645851  | 1.713217157  | 1.335530602   |
| H237 | -6.773484207  | -0.784727162 | 3.462699807   |
| H238 | -10.096318157 | 1.110536320  | -0.164621739  |
| H239 | -2.227893272  | 1.127047181  | -2.685217467  |
| H240 | -10.190017182 | -0.647564554 | 0.051168705   |
| H241 | 10.228569897  | 3.491773636  | 2.827254587   |
| H242 | 8.626011792   | 3.630586286  | 2.539086548   |
| H243 | 1.572726404   | 6.442888874  | -1.165298726  |
| H244 | -0.877352704  | 6.064506596  | 0.419085079   |
| H245 | 1.529649194   | 8.647759862  | 0.036066825   |
| H246 | -3.604522593  | 3.116578525  | -1.701026036  |
| H247 | -5.320438966  | 3.949225127  | -2.903723826  |
| H248 | -4.994287996  | 5.204422925  | -1.977439149  |
| H249 | -5.507844240  | 1.223058316  | -3.983900047  |
| H250 | -7.281145754  | 0.997383422  | -4.054648703  |
| H251 | -0.728964551  | 12.279437488 | -2.182569874  |
| H252 | -2.189807141  | 13.285346586 | -1.962888813  |



|      |              |               |               |
|------|--------------|---------------|---------------|
| H253 | -1.001536169 | 9.990838843   | -2.665295437  |
| H254 | -2.553418219 | 9.206220489   | -2.536441120  |
| H255 | -2.990919576 | 8.911047818   | -5.866348288  |
| H256 | -2.484774323 | 4.289605074   | -5.563965136  |
| H257 | -7.544219934 | 8.340086077   | -0.582466550  |
| H258 | -3.141927058 | 8.586469559   | 1.726194773   |
| H259 | -4.616148744 | 7.430374449   | -3.113882945  |
| H260 | 1.162976802  | 4.998232868   | -3.590039978  |
| H261 | 2.402379622  | 7.058052532   | -3.332660010  |
| H262 | -1.299341814 | 4.545429586   | -3.171770294  |
| H263 | -8.202159904 | -0.913528425  | -1.186491700  |
| H264 | 3.273879774  | 9.890185333   | -4.487112185  |
| H265 | -6.138117171 | -1.240369195  | -3.085942274  |
| H266 | 0.749707378  | 5.793266906   | -5.110796586  |
| H267 | -3.450433714 | 7.022596247   | -0.156674945  |
| H268 | -7.218253991 | 2.953001370   | -2.539047979  |
| H269 | 2.994553309  | 10.498598665  | -2.841989590  |
| H270 | -2.345041365 | 7.449018813   | -6.516795979  |
| H271 | -4.645810913 | 8.740411003   | -4.241634169  |
| H272 | -5.024057502 | -3.797823967  | -3.381308382  |
| H273 | -5.539350599 | -3.506458271  | -0.742531172  |
| H274 | -7.202395991 | 9.989100740   | 1.236324843   |
| H275 | -5.588740017 | 1.165673042   | -1.497129021  |
| H276 | -0.464536031 | 7.593747754   | -3.901630751  |
| H277 | -1.567374869 | 5.728865787   | -5.974951133  |
| H278 | -0.526187487 | 3.739815476   | -4.526022990  |
| H279 | -3.603259948 | 5.478925999   | -3.762004934  |
| H280 | 0.838041802  | 9.768102492   | 2.604617069   |
| H281 | -0.807742566 | 10.358935161  | -0.215958334  |
| H282 | -0.771520859 | 13.274127119  | 0.048967821   |
| H283 | 2.106362005  | 10.294709444  | 1.477408965   |
| H284 | -2.678675316 | 10.889264138  | 1.493547349   |
| H285 | 4.708572943  | -2.741309956  | -9.202183775  |
| H286 | 4.784114092  | -4.213074649  | -8.215443690  |
| H287 | 7.983363159  | -4.710973309  | -4.876167117  |
| H288 | 5.208996262  | -4.803012750  | -10.482031008 |
| H289 | 3.682860226  | -5.320577979  | -10.182480259 |
| H290 | 5.726120356  | 5.371977957   | -0.920576764  |
| H291 | 5.319487645  | 7.985658273   | 0.651414328   |
| H292 | 4.745178366  | 8.302015928   | -3.651001606  |
| H293 | 4.145271594  | 5.958647290   | -0.337720180  |
| H294 | 6.494652650  | 8.750987332   | -0.185638453  |
| H295 | 5.070827753  | 3.260174381   | -6.610451532  |
| H296 | 6.127917636  | 7.470944639   | -2.117877936  |
| H297 | 5.562857150  | -6.457596218  | 4.942622509   |
| H298 | 7.407151360  | -7.407439095  | 2.686704757   |
| H299 | 3.557912365  | 1.528134342   | -6.960122411  |
| H300 | 4.922713401  | 0.359872442   | 3.362126136   |
| H301 | 0.443162127  | 1.591739833   | -8.593872044  |
| H302 | -1.228814253 | -2.514680111  | -4.261504225  |
| H303 | 0.273695465  | 2.089079231   | -6.910159141  |
| H304 | 4.292581921  | -4.178685854  | 4.203852005   |
| H305 | 2.087197315  | 0.178064252   | -6.504014123  |
| H306 | 4.290396111  | -4.682682507  | 2.518659567   |
| H307 | 5.111240779  | -6.829099302  | 3.263155893   |
| H308 | 6.759715264  | -4.944828378  | 2.543193478   |
| H309 | 6.823082931  | -4.469451077  | 4.251924918   |
| H310 | -5.122203006 | -0.934328871  | -6.433390316  |
| H311 | 6.374865959  | -8.851055036  | 5.104894432   |
| H312 | 5.427261930  | -11.354562704 | 3.623212741   |
| H313 | 0.181398640  | -0.491334825  | -3.875243921  |
| H314 | 6.928410954  | -11.096652844 | 6.114238845   |

|       |              |               |              |
|-------|--------------|---------------|--------------|
| H315  | 5.369051096  | -11.536255724 | 5.876444922  |
| H316  | 5.414054063  | -2.717384753  | 1.852442527  |
| H317  | -0.574193220 | 1.704645027   | -4.679561293 |
| H318  | -3.381895347 | -2.314413123  | -5.486969206 |
| H319  | 8.030464940  | -9.509678869  | -1.383480540 |
| H320  | 6.906070350  | -7.340925747  | -3.735515696 |
| H321  | 6.799113285  | -7.898834580  | -0.005339610 |
| H322  | 7.329989701  | -10.248178193 | -2.541912678 |
| H323  | 4.880126246  | 2.711683430   | -9.514645577 |
| H324  | 6.554211522  | -4.799871830  | -0.328951163 |
| H325  | 2.695077980  | -7.252474366  | 0.936453061  |
| H326  | 3.375947892  | -1.844309255  | -7.548076875 |
| H327  | 3.290197467  | -8.981225553  | -0.861252282 |
| H328  | 3.435649241  | -6.682851826  | -7.120894384 |
| H329  | 2.467685728  | -5.226716613  | -5.272042639 |
| H330  | 7.087158698  | -11.884855514 | 3.910172241  |
| H331  | 5.353896786  | -0.492935821  | 1.875834882  |
| H332  | 8.625677061  | -5.438842984  | 0.724697211  |
| H333  | 7.310789652  | -3.447213945  | -0.260224803 |
| H334  | 9.306162541  | -6.354948368  | 2.833326245  |
| H335  | 4.524937313  | -2.554302516  | 5.329640809  |
| H336  | 3.293485672  | -11.571282808 | -3.684871672 |
| H337  | 3.707543348  | -8.043052203  | -3.746717433 |
| H338  | 5.051276545  | -8.171581758  | -2.595207268 |
| H339  | 2.042964250  | -8.510557983  | -2.046591894 |
| H340  | 1.470333044  | -2.064416015  | -6.106842941 |
| H341  | -2.739107427 | 1.922008270   | -5.952936307 |
| H342  | -4.980699519 | 0.839036685   | -6.520403598 |
| H343  | 2.179342287  | -5.641594701  | 0.352913478  |
| H344  | 8.746207916  | -6.981231357  | 0.636150518  |
| H345  | 7.604724944  | -8.901275064  | 0.867110669  |
| H346  | 4.413638876  | -0.842826802  | 5.300403113  |
| H347  | 5.881758799  | -7.317093663  | -6.660918012 |
| H348  | 6.645067477  | -5.753594866  | -3.018122997 |
| H349  | 0.596477244  | -2.889825784  | -7.434610123 |
| H350  | 3.932108767  | 4.422667616   | -7.320196757 |
| H351  | 7.600831823  | 0.490971244   | 4.063422031  |
| H352  | 7.654225395  | 0.881657864   | 2.329946819  |
| H353  | 9.232257750  | -6.085415167  | -6.299133139 |
| H354  | 8.659130256  | -7.470474168  | -5.645489099 |
| H355  | 10.687834719 | -8.143481587  | -1.719209351 |
| H356  | 8.842037834  | -7.774315940  | -2.995644681 |
| H357  | 11.932843744 | -6.946876788  | -3.861071113 |
| H358  | 10.524616085 | -6.461300049  | -1.166033767 |
| H359  | 10.412293943 | 0.608934517   | 2.279951768  |
| H360  | -3.420421910 | 13.130951101  | 3.592741718  |
| H361  | 10.561475807 | -6.307989431  | 5.570143188  |
| H362  | 9.835819650  | -3.890750696  | 4.419572938  |
| H363  | -5.255283785 | 12.203097154  | 1.369865363  |
| H364  | -4.163638597 | 10.149783099  | 3.390293479  |
| H365  | -5.856480024 | 10.651320070  | 3.233427731  |
| H366  | -6.595932505 | 6.700851839   | -1.820914630 |
| H367  | 0.219894372  | -1.771973412  | 0.215059665  |
| H368  | 2.272644490  | -2.892078674  | 0.013310942  |
| H369  | 1.328185038  | -0.107440444  | -2.031820870 |
| H370  | -1.519025566 | -0.337759830  | -0.731305313 |
| Mo371 | 3.845994882  | -4.192425440  | -2.442933324 |
| N372  | 2.379592150  | -0.460642927  | 1.250662472  |
| N373  | 2.354098857  | 0.040346142   | 0.241081206  |
| N374  | -6.514938325 | -7.294271289  | -0.475907947 |
| N375  | -8.656711965 | -4.896703172  | 1.421522496  |
| N376  | -8.458528514 | -5.211868268  | 4.227534079  |

|      |              |               |               |
|------|--------------|---------------|---------------|
| N377 | -5.860980973 | -6.229560372  | 4.580605808   |
| N378 | -4.319236321 | -4.029284606  | 3.602729506   |
| N379 | -4.991079160 | -2.111566739  | 5.592316156   |
| N380 | -4.202560987 | -3.389659318  | 8.067471924   |
| N381 | -1.577595196 | -4.555022449  | 7.750391001   |
| N382 | 0.051984466  | -2.758316950  | 6.408146588   |
| N383 | -0.539037672 | 0.175104259   | 6.854177198   |
| N384 | -1.092583774 | 0.007660198   | 9.632926331   |
| N385 | 6.092788992  | -10.887959792 | 5.563307514   |
| N386 | 6.748375995  | -8.701196171  | 4.161071209   |
| N387 | 5.142689519  | -2.822465008  | 2.833575135   |
| N388 | 4.435631283  | -1.710521189  | 4.773663809   |
| N389 | 5.062619361  | -0.520180579  | 2.875690060   |
| N390 | 9.372541747  | -6.415801120  | 3.871924345   |
| N391 | -5.714299203 | -3.212933632  | -2.873780237  |
| N392 | -1.584237313 | -5.544476179  | -3.133189102  |
| N393 | -6.124589751 | -0.711686926  | -2.198133730  |
| N394 | -8.451834174 | 0.024417839   | -0.881708384  |
| N395 | -7.731085036 | 0.079008456   | 1.794585016   |
| N396 | -5.682068865 | 1.943156243   | 2.245148543   |
| N397 | -3.216540803 | 2.316682222   | -1.154253729  |
| N398 | -2.151662521 | 0.508480447   | -0.618654195  |
| N399 | -6.447436168 | 4.551608158   | 2.800247764   |
| N400 | -9.899813067 | 7.443810294   | 1.394064736   |
| N401 | -9.904106534 | 9.239561044   | 2.698047818   |
| N402 | 9.399787663  | 2.960637489   | 2.549182079   |
| N403 | 6.044496974  | 7.839789729   | -0.059008727  |
| N404 | 4.114884007  | 8.732679033   | -2.979037904  |
| N405 | 1.548169050  | 7.634881603   | -3.421304384  |
| N406 | -3.052039080 | 5.966685516   | -4.491656890  |
| N407 | -2.751632970 | 7.934941855   | -5.725364722  |
| N408 | -4.163525990 | 7.917347579   | -3.890444598  |
| N409 | 0.587546346  | 6.599501938   | -0.944115671  |
| N410 | 0.793334926  | 8.868237662   | 0.713776669   |
| N411 | -0.735143398 | 11.222222923  | 0.325266135   |
| N412 | -1.978090415 | 10.026114711  | -2.347562270  |
| N413 | -3.208621720 | 11.754604159  | 1.429216640   |
| N414 | 4.255261173  | -4.480185555  | -10.304603265 |
| N415 | 2.579836211  | -2.424422681  | -7.845904369  |
| N416 | 1.378088445  | 0.325045126   | -7.246712996  |
| N417 | 3.344700086  | 2.412854783   | -7.434030403  |
| N418 | -1.536810450 | -3.033984363  | -10.069630972 |
| N419 | -3.200974521 | -1.255800903  | -8.560899165  |
| N420 | 8.404090952  | -6.502230311  | -5.864853948  |
| N421 | 4.414591613  | -5.412728633  | -4.376422424  |
| N422 | 3.964062307  | -6.374515022  | -6.309327271  |
| N423 | 9.490989757  | -6.988036137  | -2.955105437  |
| N424 | 0.075738630  | 2.667765478   | -0.601851029  |
| N425 | 0.934472290  | 1.991553482   | -0.884496110  |
| O426 | -6.430248770 | -5.328675060  | 1.624055539   |
| O427 | -7.515316771 | -3.140349268  | 4.348801891   |
| O428 | -5.906911522 | -5.475580685  | 6.738499978   |
| O429 | -2.691086290 | -4.686243378  | 5.048513483   |
| O430 | -2.972348410 | -1.134937731  | 5.205457012   |
| O431 | -3.615630489 | -1.294445463  | 8.760210775   |
| O432 | -1.281464207 | -4.287301403  | 10.008978809  |
| O433 | 1.897135854  | -4.107133082  | 6.657854512   |
| O434 | 1.715206642  | 0.046847112   | 7.174612401   |
| O435 | 0.219340261  | 1.845701000   | 9.876992157   |
| O436 | 0.737182015  | -0.208999293  | 12.702970369  |
| O437 | 7.338453868  | -9.908611891  | 2.276827142   |
| O438 | 8.307890036  | -6.984718273  | 5.827823682   |

|  |                                      |              |               |              |
|--|--------------------------------------|--------------|---------------|--------------|
|  | O439                                 | 11.863223984 | -3.934490630  | 4.642059120  |
|  | O440                                 | -5.539905902 | -0.996201796  | 0.001523500  |
|  | O441                                 | -3.536420909 | -4.697473790  | -3.932803790 |
|  | O442                                 | -7.884027774 | 2.236469252   | -0.971248277 |
|  | O443                                 | -6.600921157 | 2.825298218   | -3.303555942 |
|  | O444                                 | -9.837092591 | 0.782215900   | 2.394047616  |
|  | O445                                 | -5.622704603 | 1.423074420   | 4.469227311  |
|  | O446                                 | -4.333304746 | 5.067420366   | 3.498721685  |
|  | O447                                 | -6.808351466 | 7.076280424   | 5.253675764  |
|  | O448                                 | 10.553921489 | 0.083387948   | 4.249119917  |
|  | O449                                 | 3.550594427  | 5.173974568   | 3.941897955  |
|  | O450                                 | 3.415647792  | 8.801836850   | -0.813351456 |
|  | O451                                 | 0.661345188  | 9.751913463   | -3.485463735 |
|  | O452                                 | -1.529955247 | 6.889445961   | -1.755401198 |
|  | O453                                 | -0.760559998 | 7.962436634   | 2.131586001  |
|  | O454                                 | 2.293307189  | 6.176331234   | 1.490453003  |
|  | O455                                 | 0.523660378  | 12.346314632  | 1.874204675  |
|  | O456                                 | -3.308419253 | 13.821318299  | 0.471042300  |
|  | O457                                 | -3.848562971 | 11.273500251  | -1.935621624 |
|  | O458                                 | -5.441403300 | 13.409782189  | 3.695746021  |
|  | O459                                 | -5.659387094 | 6.692965262   | -1.544285471 |
|  | O460                                 | 1.942105888  | -4.420489159  | -8.795030551 |
|  | O461                                 | -0.208905242 | -0.741155846  | -8.515740115 |
|  | O462                                 | 1.755963679  | 3.821669805   | -8.277617656 |
|  | O463                                 | 6.121270894  | 4.222972712   | -8.921997887 |
|  | O464                                 | -4.856752594 | -2.788484404  | -8.898555429 |
|  | O465                                 | -1.131082214 | -6.610366023  | -5.985505240 |
|  | O466                                 | 0.708353389  | -5.664627559  | -6.816319899 |
|  | O467                                 | -3.901404906 | 2.215393873   | -8.368098338 |
|  | O468                                 | 10.085408515 | -4.880069137  | -3.532146920 |
|  | O469                                 | 12.953399894 | -6.448756484  | -2.165335296 |
|  | O470                                 | -0.099904901 | -6.561180568  | -0.628082745 |
|  | O471                                 | 0.525762564  | -8.464350857  | 0.334178369  |
|  | O472                                 | 5.308030565  | -10.627461166 | -3.155002614 |
|  | O473                                 | 3.074210818  | -10.634206410 | -3.494388582 |
|  | O474                                 | 5.180195251  | -5.578057975  | -1.271199567 |
|  | O475                                 | 5.137312226  | -7.353978673  | 0.114459609  |
|  | O476                                 | 2.729122442  | -5.932234231  | -2.141019597 |
|  | O477                                 | 9.199392512  | -6.187118292  | 1.025451891  |
|  | O478                                 | 7.236165507  | -4.307988765  | 0.195442483  |
|  | O479                                 | -4.580331620 | 4.515343324   | -2.549523072 |
|  | O480                                 | 8.222537311  | -10.048295722 | -2.192760948 |
|  | O481                                 | 7.693358338  | -8.337826534  | 0.053602786  |
|  | S482                                 | 4.060182493  | 5.360085869   | -2.708152091 |
|  | S483                                 | 2.232042803  | 2.157115170   | -3.452711252 |
|  | S484                                 | 2.060201083  | -3.116065751  | -3.616237870 |
|  | S485                                 | 3.963696700  | 2.326105334   | -0.327914074 |
|  | S486                                 | -0.074528833 | -2.099900695  | -1.070959195 |
|  | S487                                 | 4.140376619  | -0.581094549  | -5.626751785 |
|  | S488                                 | 3.530644100  | -3.429755920  | -0.101477276 |
|  | S489                                 | 5.923081424  | 1.796475955   | -3.188872979 |
|  | S490                                 | 5.742061496  | -2.895875838  | -3.035723834 |
|  | S491                                 | 6.236361797  | -0.679637924  | -0.173362153 |
|  | <b>23, 47(1)</b>                     |              |               |              |
|  | Fe1                                  | 2.82         |               |              |
|  | Fe2                                  | -0.93        |               |              |
|  | Fe3                                  | 2.88         |               |              |
|  | Fe4                                  | -2.21        |               |              |
|  | Fe5                                  | 2.47         |               |              |
|  | Fe6                                  | -0.46        |               |              |
|  | <b>bm1unh2b2n2x263b26n2nas.car_4</b> |              |               |              |
|  | C1                                   | -6.523203809 | -6.536331594  | -1.915223822 |
|  | C2                                   | -6.355087051 | -7.381273048  | -3.182070871 |
|  | C3                                   | -8.069405999 | -5.195774384  | -0.550438884 |
|  | C4                                   | -7.819290577 | -5.818846640  | 0.820841606  |
|  | C5                                   | -7.734561700 | -7.838125505  | 2.190056508  |
|  | C6                                   | -6.246732185 | -7.857118136  | 2.560863310  |
|  | C7                                   | -3.940926255 | -7.781927367  | 1.730159446  |

Fe7 -2.25

|     |               |               |              |
|-----|---------------|---------------|--------------|
| C8  | -3.494397966  | -6.378550345  | 2.152524799  |
| C9  | -3.769850393  | -3.970446791  | 1.895157713  |
| C10 | -4.224629922  | -3.647583408  | 3.326781468  |
| C11 | -5.878910404  | -3.940703479  | 5.073467202  |
| C12 | -5.103090142  | -4.697331915  | 6.160229966  |
| C13 | -4.267964826  | -6.868628352  | 6.930334887  |
| C14 | -2.738083932  | -6.930401199  | 7.025569350  |
| C15 | -0.601825523  | -6.887206985  | 5.804523346  |
| C16 | 0.206558832   | -5.601197472  | 5.600672669  |
| C17 | 0.056384457   | -3.158214226  | 5.142085579  |
| C18 | -0.316195221  | -2.204533356  | 6.292367874  |
| C19 | -0.316401173  | -2.624791519  | 3.740629201  |
| C20 | 0.006074495   | -1.135326276  | 3.618160623  |
| C21 | 0.383855935   | -3.460746173  | 2.664386875  |
| C22 | -2.080909514  | -0.926302077  | 7.430328670  |
| C23 | -2.114701280  | -1.597909481  | 8.814609287  |
| C24 | -3.434997557  | -0.282182599  | 7.043591968  |
| C25 | -3.956751542  | 0.624791992   | 8.164814104  |
| C26 | -3.306652899  | 0.515115720   | 5.738795578  |
| C27 | -2.786792599  | -3.502999152  | 10.154667939 |
| C28 | -1.452420077  | -3.604174352  | 10.863361301 |
| C29 | 7.411273632   | -10.923333609 | 2.326779424  |
| C30 | 7.820256752   | -9.467718305  | 2.107493105  |
| C31 | 7.552307917   | -7.177629693  | 3.074608890  |
| C32 | 8.496235576   | -6.846817986  | 4.245289786  |
| C33 | 6.197102888   | -6.463881569  | 3.215397309  |
| C34 | 6.311563520   | -4.939732857  | 3.283387904  |
| C35 | 4.951400630   | -4.276606207  | 3.065324611  |
| C36 | 4.423028582   | -1.976407523  | 3.908510203  |
| C37 | 10.550250485  | -5.692322574  | 4.909578491  |
| C38 | 10.518175600  | -4.227381650  | 5.289466162  |
| C39 | -4.298989862  | -2.843822748  | -3.221467405 |
| C40 | -5.044235090  | -1.678973139  | -2.546655721 |
| C41 | -2.800630170  | -2.729146290  | -2.892772089 |
| C42 | -1.955086262  | -3.987945451  | -3.170233619 |
| C43 | -1.368052450  | -4.098390054  | -4.573516506 |
| C44 | -5.945313445  | 0.589179102   | -2.963026807 |
| C45 | -7.330284572  | 0.507988947   | -2.310660322 |
| C46 | -5.882931968  | 1.578314953   | -4.157629502 |
| C47 | -9.272946691  | -0.900928088  | -1.812486960 |
| C48 | -9.080405246  | -1.112726020  | -0.304554960 |
| C49 | -7.522583649  | -1.554307519  | 1.537118526  |
| C50 | -6.697702756  | -0.467173140  | 2.228809703  |
| C51 | -5.417158057  | 1.620604106   | 2.060651961  |
| C52 | -6.250569569  | 2.591738190   | 2.926468151  |
| C53 | -4.716783702  | 2.470458543   | 0.988435738  |
| C54 | -3.738811739  | 1.774355848   | 0.086493511  |
| C55 | -2.920142288  | 0.681335312   | 0.290787094  |
| C56 | -2.568392718  | 1.501588244   | -1.728475003 |
| C57 | -8.390248661  | 3.814818522   | 3.059320548  |
| C58 | -8.608095059  | 3.567991967   | 4.549078833  |
| C59 | -9.726947179  | 3.778898870   | 2.284003313  |
| C60 | -10.556329199 | 5.028882265   | 2.332536286  |
| C61 | -10.819511992 | 5.899998016   | 3.371729801  |
| C62 | -11.855020140 | 6.562138605   | 1.527653087  |
| C63 | 7.934533855   | 1.895684731   | 5.738355365  |
| C64 | 9.132478147   | 0.992602267   | 5.512603755  |
| C65 | 6.717643773   | 1.197319394   | 5.079219440  |
| C66 | 5.431709192   | 1.968594250   | 5.259016017  |
| C67 | 4.634538620   | 1.802115452   | 6.407544497  |
| C68 | 4.989591198   | 2.873357208   | 4.277480884  |
| C69 | 3.434987257   | 2.505706220   | 6.569226773  |

|      |              |              |               |
|------|--------------|--------------|---------------|
| C70  | 3.802317347  | 3.591141639  | 4.428790253   |
| C71  | 3.023428252  | 3.403796895  | 5.575502130   |
| C72  | 4.168281840  | 8.109347781  | 1.766624628   |
| C73  | 2.938290094  | 8.964242958  | 1.434274796   |
| C74  | 3.892644336  | 6.636153878  | 1.419829866   |
| C75  | 1.881999968  | 10.473427387 | -0.184935869  |
| C76  | 0.624675773  | 9.724825019  | -0.627822488  |
| C77  | -0.383830483 | 7.615957004  | -1.390533688  |
| C78  | -1.154145175 | 7.033973687  | -0.188563910  |
| C79  | 0.090598781  | 6.533080420  | -2.376781546  |
| C80  | -0.962066206 | 5.563315040  | -2.928242936  |
| C81  | -1.982265713 | 6.125955345  | -3.935229624  |
| C82  | -3.716682772 | 7.813101114  | -3.310152963  |
| C83  | -1.085558924 | 6.057040056  | 2.053160613   |
| C84  | -1.554938907 | 7.114202931  | 3.072832661   |
| C85  | -0.220427859 | 5.022956841  | 2.777864215   |
| C86  | -0.991724769 | 9.199550725  | 4.222559874   |
| C87  | -1.913825893 | 10.412124413 | 4.115532512   |
| C88  | -3.491558934 | 11.699965844 | 2.733685052   |
| C89  | -4.941932315 | 11.649154960 | 3.261990375   |
| C90  | -3.470848078 | 12.058396924 | 1.230064130   |
| C91  | -4.126609364 | 10.975669202 | 0.379964515   |
| C92  | -6.772427824 | 10.212035606 | 4.066258725   |
| C93  | -7.081454268 | 10.883302974 | 5.398372904   |
| C94  | -7.046252528 | 8.684384060  | 4.165337906   |
| C95  | -6.882250097 | 7.9644463292 | 2.843846187   |
| C96  | -7.937597736 | 7.918151960  | 1.918725834   |
| C97  | -5.667493220 | 7.350470436  | 2.489775874   |
| C98  | -7.787062650 | 7.298421343  | 0.675367148   |
| C99  | -5.490598952 | 6.743606253  | 1.243412819   |
| C100 | -6.557258439 | 6.722384562  | 0.344978405   |
| C101 | 6.215290854  | -0.476951988 | -8.610353132  |
| C102 | 4.722874183  | -0.647165349 | -8.378273605  |
| C103 | 2.798278040  | 0.135244014  | -7.007759274  |
| C104 | 2.117782491  | 1.481347115  | -7.277709735  |
| C105 | 1.943447058  | 3.820198917  | -6.584010431  |
| C106 | 2.868768812  | 5.000680630  | -6.306902748  |
| C107 | 4.926543138  | 5.878160425  | -5.332395574  |
| C108 | 5.886371002  | 6.372131373  | -6.395506068  |
| C109 | -0.422690001 | -1.116515157 | -10.062514897 |
| C110 | -1.692476061 | -0.322045339 | -9.726935044  |
| C111 | -0.065681733 | -2.063054685 | -8.892059363  |
| C112 | 0.944487783  | -3.136129679 | -9.342539830  |
| C113 | 1.540467975  | -3.856670052 | -8.154548588  |
| C114 | -2.662506533 | 1.636637743  | -8.616245263  |
| C115 | -2.358598095 | 3.108409156  | -8.817344716  |
| C116 | -3.211721730 | 1.275909798  | -7.211741042  |
| C117 | -2.127428467 | 1.080751851  | -6.180715826  |
| C118 | -1.544864123 | 2.169751148  | -5.509463502  |
| C119 | -1.620275191 | -0.206166162 | -5.932022075  |
| C120 | -0.475241799 | 1.972405751  | -4.628121712  |
| C121 | -0.543492086 | -0.400935346 | -5.060208680  |
| C122 | 0.040012270  | 0.690620707  | -4.411328431  |
| C123 | 9.583601558  | -3.246915691 | -4.287407797  |
| C124 | 10.594639422 | -3.424448330 | -3.139724335  |
| C125 | 8.277117454  | -4.017510896 | -4.029946585  |
| C126 | 7.160311419  | -3.752154059 | -4.994592617  |
| C127 | 7.144383939  | -3.976558112 | -6.356432271  |
| C128 | 5.128922957  | -3.332732270 | -5.697583733  |
| C129 | 11.836170731 | -4.892379394 | -1.650437817  |
| C130 | 13.153373204 | -4.190038743 | -1.892820319  |
| C131 | 2.052483089  | -6.742868540 | -1.777040274  |

|       |              |              |              |
|-------|--------------|--------------|--------------|
| C132  | 3.306882186  | -6.196833539 | -1.151673057 |
| C133  | 4.434092701  | -5.848668821 | -2.203998190 |
| C134  | 4.732542400  | -7.107539779 | -3.065382376 |
| C135  | 5.921893390  | -6.895569401 | -4.014764831 |
| C136  | 6.395055891  | -8.154668807 | -4.683414557 |
| C137  | 5.721012927  | -5.538614361 | -1.377300865 |
| C138  | 3.993541615  | 0.641898376  | -1.492516007 |
| Fe139 | 4.634590431  | -0.205368153 | -3.162334339 |
| Fe140 | 2.439569560  | 1.997435516  | -1.058154065 |
| Fe141 | 4.995349049  | 1.685617727  | -0.113248273 |
| Fe142 | 4.502095582  | 2.244313081  | -2.581379555 |
| Fe143 | 3.902886489  | 4.178414278  | -0.876870135 |
| Fe144 | 5.078188848  | -0.853951804 | -0.727664885 |
| Fe145 | 2.478374584  | -0.627845606 | -1.282592164 |
| H146  | -4.401813322 | -7.860867777 | -2.854769014 |
| H147  | -4.602567894 | -6.682701041 | -3.967476441 |
| H148  | -8.489397693 | -6.185204976 | -2.397860878 |
| H149  | -6.959810813 | -6.950021495 | -3.994698695 |
| H150  | -6.801918831 | -8.366307993 | -2.959137665 |
| H151  | -7.457198839 | -4.284183635 | -0.591947282 |
| H152  | -8.328790458 | -7.684645827 | 0.125657418  |
| H153  | -9.125477475 | -4.899804124 | -0.608738376 |
| H154  | -8.093269843 | -8.872351431 | 2.109299354  |
| H155  | -5.729759009 | -7.735361568 | 0.577515185  |
| H156  | -8.264463517 | -7.352266472 | 3.019708422  |
| H157  | -2.688512605 | -3.783707153 | 1.858750726  |
| H158  | -4.679686243 | -5.514249772 | 0.696978933  |
| H159  | -3.432942890 | -8.064757271 | 0.797891667  |
| H160  | -5.804562465 | -2.870591368 | 5.305130707  |
| H161  | -6.000298796 | -4.681598714 | 3.056498648  |
| H162  | -3.622439790 | -8.469915721 | 2.522128551  |
| H163  | -4.258628414 | -3.289588976 | 1.183560388  |
| H164  | -5.192776601 | -6.442855099 | 5.052285941  |
| H165  | -6.935480629 | -4.238261028 | 5.124270123  |
| H166  | 0.169690126  | -4.532627795 | 2.787482389  |
| H167  | 0.048302347  | -3.166857526 | 1.659369372  |
| H168  | 1.474792105  | -3.316120802 | 2.701252164  |
| H169  | -1.404519566 | -2.747034199 | 3.625271783  |
| H170  | -4.626543293 | -7.893174960 | 6.752710475  |
| H171  | -2.993383506 | -0.110872998 | 4.891860445  |
| H172  | -3.190164970 | -3.223242201 | 8.081299477  |
| H173  | -4.121876989 | 0.081779337  | 9.106364298  |
| H174  | -0.221591753 | -0.777279244 | 2.605702215  |
| H175  | 1.071855136  | -0.937905674 | 3.794532212  |
| H176  | 7.752287220  | 1.937980401  | 6.829430355  |
| H177  | -4.273189896 | 0.967050498  | 5.472838627  |
| H178  | -4.911190718 | 1.078029312  | 7.858483604  |
| H179  | -2.573088391 | 1.329295720  | 5.857984543  |
| H180  | -3.245566927 | 1.442105663  | 8.366235415  |
| H181  | -4.163189411 | -1.098718436 | 6.888865804  |
| H182  | -1.323716134 | -0.133630620 | 7.523461920  |
| H183  | -2.301181409 | -2.177737041 | 5.693654963  |
| H184  | -0.577520116 | -0.528154224 | 4.324390651  |
| H185  | 0.117196469  | 4.267890329  | 2.047045693  |
| H186  | -0.860195397 | 4.528449480  | 3.526533159  |
| H187  | 1.192996909  | 5.112294852  | 4.135259161  |
| H188  | 1.361823751  | 3.863493750  | 6.471049874  |
| H189  | 3.462571389  | 4.263753896  | 3.640705667  |
| H190  | 5.562224657  | 2.993396717  | 3.355531471  |
| H191  | 4.947751142  | 1.101212565  | 7.186274327  |
| H192  | -1.533185529 | -4.579552167 | 5.336617423  |
| H193  | -0.333758573 | -7.570047910 | 4.983776317  |

|      |               |              |               |
|------|---------------|--------------|---------------|
| H194 | -0.261822058  | -7.339422763 | 6.745896269   |
| H195 | -2.547034529  | -6.648049915 | 4.976819302   |
| H196 | -4.626010803  | -6.547737459 | 7.916741657   |
| H197 | 2.817970702   | 2.347751825  | 7.457558981   |
| H198 | 1.144600499   | -3.284964869 | 5.209821698   |
| H199 | -3.516323209  | -3.022504185 | 10.826372141  |
| H200 | -3.130307779  | -4.532332464 | 9.965642980   |
| H201 | -0.562895751  | -3.613382220 | 10.191801531  |
| H202 | 11.565093783  | -5.957510193 | 4.575634058   |
| H203 | 0.321480957   | -4.697756684 | -5.565447825  |
| H204 | 2.686955398   | -8.506468446 | -1.323171308  |
| H205 | 0.430694132   | -3.876924505 | -9.972176126  |
| H206 | 1.744150499   | -2.671283476 | -9.937824651  |
| H207 | -0.972250682  | -2.559200791 | -8.513405026  |
| H208 | -1.664157902  | 3.317612875  | -9.665252532  |
| H209 | -0.733082627  | -1.746180276 | -10.910986053 |
| H210 | -2.385022556  | -1.865342080 | -3.433085904  |
| H211 | -2.562746321  | -4.894363844 | -2.998669620  |
| H212 | -0.588608371  | 1.102917839  | -8.706517388  |
| H213 | -3.463621283  | 1.419936366  | -9.350008435  |
| H214 | 1.092606190   | 0.271377637  | -9.771927618  |
| H215 | 0.421898534   | -4.837747478 | -3.812008350  |
| H216 | 0.335438644   | -1.466115918 | -8.058323994  |
| H217 | 1.384351853   | -0.803419983 | -10.984182394 |
| H218 | -5.329050879  | -3.456660968 | -4.903131602  |
| H219 | -2.711270226  | -2.498825933 | -1.822168223  |
| H220 | 3.107106028   | -2.665249218 | -8.294397526  |
| H221 | -1.133436951  | -4.014592274 | -2.440817494  |
| H222 | -4.681084003  | 1.165562167  | 2.739182920   |
| H223 | -2.798483115  | 0.013050636  | 1.136828654   |
| H224 | -8.482286934  | -1.610830724 | 2.068740276   |
| H225 | -7.036625317  | -1.440153650 | -0.544038572  |
| H226 | -7.882648069  | 2.184253690  | 1.757992368   |
| H227 | -10.489249791 | 5.925123059  | 4.403942127   |
| H228 | -8.625057413  | 2.487502380  | 4.830547439   |
| H229 | -10.313784015 | 2.902272788  | 2.610281147   |
| H230 | -7.912288633  | 4.799693241  | 2.935486697   |
| H231 | -12.474410478 | 7.170471077  | 0.874482108   |
| H232 | -4.207015557  | 3.291398455  | 1.519231872   |
| H233 | -5.486319106  | 2.941447915  | 0.356220896   |
| H234 | -12.017067774 | 7.672025112  | 3.338225244   |
| H235 | -9.482216115  | 3.611566235  | 1.223243186   |
| H236 | -6.406304937  | 0.571452010  | 0.462157326   |
| H237 | -7.008727011  | -2.512202572 | 1.701204517   |
| H238 | -10.007086537 | -0.091078151 | -1.921295850  |
| H239 | -2.134053010  | 1.615793322  | -2.717982425  |
| H240 | -9.726150138  | -1.812519454 | -2.225380010  |
| H241 | 8.825841804   | 3.741907047  | 5.699579976   |
| H242 | 7.318357125   | 3.727958094  | 5.066897017   |
| H243 | 0.599661894   | 6.585310240  | 0.819906415   |
| H244 | -1.997167157  | 5.548481953  | 1.709292189   |
| H245 | -0.037258275  | 8.384802080  | 2.523333036   |
| H246 | -4.299012263  | 3.694769559  | -1.829627920  |
| H247 | -5.768550608  | 3.368573173  | -3.284629984  |
| H248 | -5.372301159  | 4.846735664  | -1.540221290  |
| H249 | -4.826542493  | 1.603593596  | -4.484955305  |
| H250 | -6.486733848  | 1.175542375  | -4.988245016  |
| H251 | -2.424928018  | 12.228703071 | 0.934069134   |
| H252 | -4.033170939  | 12.991364750 | 1.098477252   |
| H253 | -2.266044927  | 10.170627786 | -0.193455541  |
| H254 | -3.682398670  | 9.249750183  | -0.625946420  |
| H255 | -3.546823769  | 9.738973101  | -3.987991257  |



|      |              |               |               |
|------|--------------|---------------|---------------|
| H256 | -2.247855437 | 5.344901808   | -4.661598760  |
| H257 | -8.627137260 | 7.261288537   | -0.023569734  |
| H258 | -4.832859870 | 7.328134898   | 3.195319351   |
| H259 | -5.229480156 | 7.391075340   | -1.979420783  |
| H260 | 0.873398614  | 5.932473438   | -1.885963831  |
| H261 | 1.674619026  | 7.954503787   | -0.867358309  |
| H262 | -1.494829387 | 5.048784677   | -2.114308011  |
| H263 | -7.664052183 | -1.320770480  | -3.167629305  |
| H264 | 2.219843228  | 11.092168016  | -1.027820046  |
| H265 | -5.173187713 | -0.905198810  | -4.379228941  |
| H266 | 0.580619910  | 7.051491307   | -3.218128867  |
| H267 | -4.526905010 | 6.312505703   | 0.965959752   |
| H268 | 1.564438259  | 11.148079968  | 0.621770163   |
| H269 | -2.566229558 | 8.596360527   | -4.823820570  |
| H270 | -5.345475122 | 8.921293394   | -2.776675931  |
| H271 | -3.702061581 | -3.191937129  | -5.160140499  |
| H272 | -4.679892058 | -3.754337987  | -2.719795644  |
| H273 | -8.898989867 | 8.370801309   | 2.173878202   |
| H274 | -5.291056484 | 0.969840569   | -2.163202495  |
| H275 | -1.100201039 | 8.290299022   | -1.879561433  |
| H276 | -1.525976354 | 6.939554120   | -4.513609143  |
| H277 | -0.395123816 | 4.780213295   | -3.451061347  |
| H278 | -3.803916875 | 5.828135897   | -2.855548756  |
| H279 | -1.331708959 | 8.622994379   | 5.096061300   |
| H280 | -2.550693543 | 9.822941487   | 2.254556687   |
| H281 | -3.017257258 | 12.522906476  | 3.288091020   |
| H282 | 0.010757226  | 9.590468790   | 4.444750388   |
| H283 | -4.752217988 | 9.647399751   | 3.611199445   |
| H284 | 6.503931762  | 0.565788232   | -8.413050542  |
| H285 | 6.715187395  | -1.099789872  | -7.840409394  |
| H286 | 9.361552071  | -2.169845878  | -4.304469381  |
| H287 | 7.576805177  | -0.941318734  | -10.055909355 |
| H288 | 6.156304644  | -1.747438503  | -10.199064556 |
| H289 | 4.788915589  | 6.056026399   | 1.672155228   |
| H290 | 3.707389433  | 8.034859331   | 3.745739247   |
| H291 | 3.778974862  | 9.497883956   | -0.360080040  |
| H292 | 3.053177395  | 6.270084150   | 2.029602462   |
| H293 | 4.820270011  | 9.173635319   | 3.389259959   |
| H294 | 5.507873221  | 5.569718564   | -4.450330933  |
| H295 | 5.020298538  | 8.454763476   | 1.159766228   |
| H296 | 5.685358376  | -6.848291875  | 4.113396890   |
| H297 | 8.018460208  | -6.884934838  | 2.125851642   |
| H298 | 4.361200209  | 3.830538447   | -5.454071730  |
| H299 | 4.088326834  | 0.004963412   | 4.309511936   |
| H300 | 1.572610283  | 3.927689632   | -7.611328061  |
| H301 | -0.149929642 | -1.404948206  | -4.886949082  |
| H302 | 1.072864040  | 3.957749968   | -5.921386652  |
| H303 | 4.222803703  | -4.598016405  | 3.821710950   |
| H304 | 3.076541367  | 2.223131860   | -5.634051090  |
| H305 | 4.540278590  | -4.580607541  | 2.089323555   |
| H306 | 5.593215786  | -6.754577355  | 2.340573243   |
| H307 | 6.994194216  | -4.575165600  | 2.501383988   |
| H308 | 6.725614581  | -4.622152396  | 4.254130975   |
| H309 | -3.794265050 | 0.349401457   | -7.313748166  |
| H310 | 6.826163215  | -9.073016535  | 3.795084247   |
| H311 | 6.648069730  | -11.141335617 | 1.564253421   |
| H312 | 0.874937796  | 0.542410321   | -3.723930600  |
| H313 | 7.590478469  | -11.430588097 | 4.314415529   |
| H314 | 6.209139141  | -11.974804798 | 3.623150825   |
| H315 | 5.476080880  | -2.382852249  | 2.245587597   |
| H316 | -0.023805455 | 2.814877215   | -4.101162784  |
| H317 | -2.073218731 | -1.071884042  | -6.420166836  |

|       |              |               |              |
|-------|--------------|---------------|--------------|
| H318  | 9.642449915  | -7.642867751  | -2.123911513 |
| H319  | 8.501125111  | -5.099308881  | -4.046374692 |
| H320  | 7.959516840  | -6.663052415  | -0.620173736 |
| H321  | 9.262754172  | -8.139800312  | -3.536233614 |
| H322  | 5.797484178  | 5.871546723   | -7.390778738 |
| H323  | 7.226336537  | -3.653845815  | -0.169997100 |
| H324  | 3.719575118  | -6.896914828  | -0.410274318 |
| H325  | 4.811510092  | 0.739226127   | -6.866796576 |
| H326  | 4.948739682  | -7.948094449  | -2.387211019 |
| H327  | 5.501017615  | -3.805357572  | -7.723076423 |
| H328  | 4.075884672  | -3.080974552  | -5.736791064 |
| H329  | 8.292172603  | -11.537477197 | 2.073401532  |
| H330  | 4.801690034  | -0.326712187  | 2.728980052  |
| H331  | 9.186989495  | -4.299009193  | 1.069438061  |
| H332  | 7.655384715  | -2.281950266  | 0.421844183  |
| H333  | 9.659368999  | -5.708368493  | 2.946302879  |
| H334  | 4.095414042  | -3.324072659  | 5.429005873  |
| H335  | 5.824476117  | -9.571672305  | -5.799140278 |
| H336  | 5.632037521  | -6.168668107  | -4.788176483 |
| H337  | 6.782261050  | -6.489575509  | -3.471922112 |
| H338  | 3.837311412  | -7.356603897  | -3.653172021 |
| H339  | 2.765604010  | -0.116504825  | -5.934943568 |
| H340  | -1.932215821 | 3.175887577   | -5.689261642 |
| H341  | -3.902991822 | 2.080424907   | -6.917513016 |
| H342  | 3.052300110  | -5.254426572  | -0.649792087 |
| H343  | 9.586646631  | -5.719694014  | 0.597809976  |
| H344  | 8.814112737  | -7.753194758  | 0.080658369  |
| H345  | 3.402366983  | -1.771486718  | 5.671950413  |
| H346  | 7.925906143  | -4.302076069  | -7.032202150 |
| H347  | 7.922590691  | -3.793397166  | -3.016422117 |
| H348  | 2.271355860  | -0.631557238  | -7.579575106 |
| H349  | 4.293290532  | 6.727218029   | -5.028769011 |
| H350  | 6.623185865  | 0.196953009   | 5.528780519  |
| H351  | 6.925700438  | 1.064243507   | 4.005737854  |
| H352  | 10.994008051 | -3.002444143  | -5.756349727 |
| H353  | 10.533410269 | -4.559164726  | -5.562231420 |
| H354  | 12.048736635 | -5.970701698  | -1.590585052 |
| H355  | 10.399909485 | -5.514322620  | -3.092416439 |
| H356  | 13.419689137 | -4.032140398  | -2.965622460 |
| H357  | 11.424094651 | -4.576848560  | -0.678218171 |
| H358  | 9.621029389  | 1.123791011   | 4.516564600  |
| H359  | -6.191123740 | 11.129264165  | 6.025055458  |
| H360  | 10.335150263 | -6.268114597  | 5.827222781  |
| H361  | 9.543912014  | -3.710774876  | 5.112567185  |
| H362  | -7.443810418 | 10.651142464  | 3.310469293  |
| H363  | -6.371451266 | 8.252314769   | 4.921166331  |
| H364  | -8.072227690 | 8.566101099   | 4.541847984  |
| H365  | -7.205684448 | 6.079825434   | -1.370605296 |
| H366  | 0.098916651  | -1.741811420  | 0.010122619  |
| H367  | 2.506822374  | -2.644289818  | -0.606945570 |
| H368  | -1.435433528 | -0.164301641  | -1.047274942 |
| H369  | 1.624641768  | 0.637408098   | -1.737448488 |
| Mo370 | 4.863655990  | -2.869374976  | -2.562990580 |
| N371  | 2.076206753  | -0.164471757  | 1.577464784  |
| N372  | 2.224488206  | -0.314218993  | 0.471311183  |
| N373  | -4.988635973 | -7.572494153  | -3.642597433 |
| N374  | -7.780823656 | -6.072007152  | -1.677307732 |
| N375  | -8.018301050 | -7.155465635  | 0.936996159  |
| N376  | -5.376363626 | -7.894693376  | 1.520972463  |
| N377  | -4.065387462 | -5.339043587  | 1.493906662  |
| N378  | -5.397850962 | -4.196816214  | 3.726015233  |
| N379  | -4.836203852 | -6.006022888  | 5.906417728  |

|      |               |               |               |
|------|---------------|---------------|---------------|
| N380 | -2.046693804  | -6.739033168  | 5.867417890   |
| N381 | -0.521468112  | -4.477336859  | 5.386346681   |
| N382 | -1.632116747  | -1.864395862  | 6.399840046   |
| N383 | -2.677130150  | -2.831573882  | 8.874144968   |
| N384 | 6.848620606   | -11.179695131 | 3.657117324   |
| N385 | 7.342405077   | -8.618167629  | 3.034391374   |
| N386 | 5.041084427   | -2.815515492  | 3.065718788   |
| N387 | 3.809503326   | -2.438833008  | 5.023783649   |
| N388 | 4.370353287   | -0.676535144  | 3.611470274   |
| N389 | 9.552692320   | -6.058345701  | 3.922665643   |
| N390 | -4.544405473  | -2.844473173  | -4.669601616  |
| N391 | -0.110880074  | -4.581835449  | -4.644658614  |
| N392 | -5.430398424  | -0.701332593  | -3.401940887  |
| N393 | -8.068684526  | -0.608177830  | -2.566752275  |
| N394 | -7.814592927  | -1.371141330  | 0.126946408   |
| N395 | -6.232921812  | 0.564189230   | 1.466733347   |
| N396 | -3.508114463  | 2.277992177   | -1.185507339  |
| N397 | -2.197234658  | 0.521786676   | -0.872318754  |
| N398 | -7.533618890  | 2.768413019   | 2.514871483   |
| N399 | -11.209469896 | 5.453976334   | 1.186899021   |
| N400 | -11.645683144 | 6.868238845   | 2.839469821   |
| N401 | 8.190832208   | 3.194516337   | 5.113836907   |
| N402 | 4.546443340   | 8.208501343   | 3.182504519   |
| N403 | 2.991173906   | 9.656701055   | 0.263245650   |
| N404 | 0.762582187   | 8.428905086   | -0.985948334  |
| N405 | -3.241508836  | 6.571753509   | -3.324386799  |
| N406 | -3.133907644  | 8.811419683   | -4.011588252  |
| N407 | -4.763578607  | 8.130492485   | -2.512042939  |
| N408 | -0.420028324  | 6.613374971   | 0.879046752   |
| N409 | -0.898983017  | 8.311558701   | 3.072144705   |
| N410 | -2.704538909  | 10.499443259  | 3.004533984   |
| N411 | -3.279542152  | 10.029399498  | -0.106179654  |
| N412 | -5.387916826  | 10.438977191  | 3.677270707   |
| N413 | 6.562439868   | -0.830477192  | -9.990077051  |
| N414 | 4.188180334   | 0.163914062   | -7.448367920  |
| N415 | 2.481514107   | 2.479317518   | -6.443756561  |
| N416 | 4.092486452   | 4.770002364   | -5.764612045  |
| N417 | 0.652086428   | -0.240668104  | -10.546228192 |
| N418 | -1.521513894  | 0.841465428   | -9.041333865  |
| N419 | 10.177572352  | -3.598424876  | -5.592209606  |
| N420 | 5.885138474   | -3.341316953  | -4.604251032  |
| N421 | 5.859370294   | -3.706674228  | -6.777163898  |
| N422 | 10.893652212  | -4.692593298  | -2.740335246  |
| N423 | -0.228162458  | 2.861027620   | -0.187036065  |
| N424 | 0.777560843   | 2.486132628   | -0.547138706  |
| O425 | -5.589702868  | -6.343833652  | -1.113982867  |
| O426 | -7.459640165  | -5.113281258  | 1.776590099   |
| O427 | -5.888352769  | -7.871371197  | 3.749723640   |
| O428 | -2.668428632  | -6.210318835  | 3.064277456   |
| O429 | -3.549375790  | -2.922203685  | 4.073433885   |
| O430 | -4.783497717  | -4.138534596  | 7.223993999   |
| O431 | -2.204136936  | -7.188896766  | 8.113510317   |
| O432 | 1.446149160   | -5.643427998  | 5.621602221   |
| O433 | 0.548769606   | -1.775002834  | 7.070721235   |
| O434 | -1.646469144  | -1.046518444  | 9.825258701   |
| O435 | -1.343696681  | -3.740723803  | 12.073167645  |
| O436 | 8.520460176   | -9.163069054  | 1.118055919   |
| O437 | 8.277934433   | -7.292040616  | 5.385631574   |
| O438 | 11.471130919  | -3.639788870  | 5.776717246   |
| O439 | -5.265477130  | -1.649865465  | -1.317727819  |
| O440 | -2.008394486  | -3.779031313  | -5.601549910  |
| O441 | -7.720853451  | 1.394453019   | -1.536607956  |

|                  |                                        |              |               |              |              |
|------------------|----------------------------------------|--------------|---------------|--------------|--------------|
| O442             | -6.382335166                           | 2.873366949  | -3.891174757  |              |              |
| O443             | -10.069720588                          | -1.073108056 | 0.442123180   |              |              |
| O444             | -6.481694683                           | -0.549113772 | 3.444372236   |              |              |
| O445             | -5.750600721                           | 3.220523331  | 3.866076211   |              |              |
| O446             | -8.788093454                           | 4.446677541  | 5.375374481   |              |              |
| O447             | 9.534291741                            | 0.167792031  | 6.320741365   |              |              |
| O448             | 1.849336220                            | 4.124226545  | 5.668223114   |              |              |
| O449             | 1.947987927                            | 9.024808389  | 2.187211007   |              |              |
| O450             | -0.455376824                           | 10.349030871 | -0.672985893  |              |              |
| O451             | -2.392549286                           | 6.969575307  | -0.215016905  |              |              |
| O452             | -2.466293781                           | 6.840596198  | 3.866261457   |              |              |
| O453             | 0.887836754                            | 5.681082329  | 3.399170635   |              |              |
| O454             | -1.932939114                           | 11.250489425 | 5.026405525   |              |              |
| O455             | -5.634366642                           | 12.675712266 | 3.298902556   |              |              |
| O456             | -5.357037989                           | 10.923727108 | 0.225299158   |              |              |
| O457             | -8.218834815                           | 11.113296850 | 5.777028211   |              |              |
| O458             | -6.347326213                           | 6.124859626  | -0.906425840  |              |              |
| O459             | 4.074830139                            | -1.524639404 | -9.006122984  |              |              |
| O460             | 1.312558672                            | 1.629535366  | -8.222323661  |              |              |
| O461             | 2.452659167                            | 6.143780942  | -6.561857932  |              |              |
| O462             | 6.705867144                            | 7.254069791  | -6.194267555  |              |              |
| O463             | -2.816433527                           | -0.739746500 | -10.055512660 |              |              |
| O464             | 0.978248845                            | -4.768188029 | -7.557147632  |              |              |
| O465             | 2.742276171                            | -3.416477696 | -7.728466455  |              |              |
| O466             | -2.845313169                           | 4.016889844  | -8.160169010  |              |              |
| O467             | 11.183760832                           | -2.448846696 | -2.638568323  |              |              |
| O468             | 13.922908657                           | -3.878472002 | -0.993675902  |              |              |
| O469             | 1.164884453                            | -6.083534229 | -2.294611439  |              |              |
| O470             | 1.914596461                            | -8.110337085 | -1.769369493  |              |              |
| O471             | 7.529948329                            | -8.621101052 | -4.609550994  |              |              |
| O472             | 5.424502896                            | -8.763144089 | -5.413813921  |              |              |
| O473             | 6.196474691                            | -4.343573041 | -1.522558658  |              |              |
| O474             | 6.249729363                            | -6.429950446 | -0.672799178  |              |              |
| O475             | 4.070283514                            | -4.769932112 | -2.985264799  |              |              |
| O476             | 9.828029597                            | -5.026331737 | 1.267559597   |              |              |
| O477             | 7.715831474                            | -3.244461167 | 0.589230502   |              |              |
| O478             | -4.841827470                           | 4.445867692  | -2.259703962  |              |              |
| O479             | 10.043652150                           | -7.907160467 | -2.991233979  |              |              |
| O480             | 8.906249987                            | -6.968039054 | -0.519762767  |              |              |
| S481             | 3.491174915                            | 6.378264933  | -0.370274714  |              |              |
| S482             | 2.692602816                            | 3.548957556  | -2.642849112  |              |              |
| S483             | 2.972630344                            | -1.678307515 | -3.455685947  |              |              |
| S484             | 3.304591803                            | 2.870971162  | 0.867529035   |              |              |
| S485             | 0.370394639                            | -1.718891880 | -1.322287635  |              |              |
| S486             | 5.069390189                            | 1.472855066  | -4.583795291  |              |              |
| S487             | 3.861929454                            | -2.795938710 | -0.296834832  |              |              |
| S488             | 5.994751671                            | 3.359731234  | -1.363041779  |              |              |
| S489             | 6.521932917                            | -1.189873505 | -2.393842168  |              |              |
| S490             | 6.127072618                            | 0.089643562  | 0.992664761   |              |              |
| <b>23, 35(2)</b> | <b>bm1unh2b2n2x263b26n2nas35.car_1</b> |              |               |              |              |
| Fe1              | 2.91                                   | C1           | -6.522445599  | -6.537700215 | -1.914814614 |
| Fe2              | -1.02                                  | C2           | -6.353946881  | -7.378671559 | -3.184330469 |
| Fe3              | -2.35                                  | C3           | -8.064502490  | -5.193540319 | -0.549252661 |
| Fe4              | 2.75                                   | C4           | -7.816387366  | -5.818294672 | 0.821556416  |
| Fe5              | -2.42                                  | C5           | -7.734285475  | -7.838680175 | 2.188453633  |
| Fe6              | 0.49                                   | C6           | -6.246577608  | -7.858444264 | 2.560555862  |
| Fe7              | 2.37                                   | C7           | -3.940221981  | -7.781855738 | 1.730616162  |
|                  |                                        | C8           | -3.492948033  | -6.378992225 | 2.153596162  |
|                  |                                        | C9           | -3.765760159  | -3.970209481 | 1.899324099  |
|                  |                                        | C10          | -4.221888618  | -3.649914844 | 3.330986185  |
|                  |                                        | C11          | -5.879931153  | -3.943460982 | 5.073675359  |

|     |               |               |              |
|-----|---------------|---------------|--------------|
| C12 | -5.104641416  | -4.699598560  | 6.161137280  |
| C13 | -4.269431818  | -6.870233616  | 6.931091351  |
| C14 | -2.739342221  | -6.929611759  | 7.026939971  |
| C15 | -0.602132131  | -6.884688307  | 5.806636678  |
| C16 | 0.205876723   | -5.598815323  | 5.600967981  |
| C17 | 0.057548214   | -3.155783654  | 5.138736545  |
| C18 | -0.315273391  | -2.200291805  | 6.287732104  |
| C19 | -0.314505558  | -2.623334464  | 3.737974846  |
| C20 | 0.008442381   | -1.133788513  | 3.614968601  |
| C21 | 0.385900652   | -3.459175504  | 2.661658102  |
| C22 | -2.082395874  | -0.927222745  | 7.428414785  |
| C23 | -2.115247841  | -1.599190604  | 8.812700016  |
| C24 | -3.438331906  | -0.285869099  | 7.041645832  |
| C25 | -3.962165185  | 0.619085307   | 8.163572940  |
| C26 | -3.311408579  | 0.511952559   | 5.737256729  |
| C27 | -2.786112350  | -3.504331493  | 10.150165427 |
| C28 | -1.451836379  | -3.604628045  | 10.860089267 |
| C29 | 7.409474526   | -10.918642862 | 2.320479098  |
| C30 | 7.821876409   | -9.464174724  | 2.105730817  |
| C31 | 7.550825857   | -7.175353193  | 3.074110149  |
| C32 | 8.496770874   | -6.845135072  | 4.243159572  |
| C33 | 6.195874565   | -6.462311525  | 3.218013232  |
| C34 | 6.309790317   | -4.938413936  | 3.286311184  |
| C35 | 4.947864851   | -4.276985658  | 3.074725558  |
| C36 | 4.417652616   | -1.977100794  | 3.920905012  |
| C37 | 10.548858834  | -5.686780471  | 4.903768943  |
| C38 | 10.515920351  | -4.222932697  | 5.287536602  |
| C39 | -4.300349653  | -2.844138982  | -3.224858438 |
| C40 | -5.046178891  | -1.680987442  | -2.547272649 |
| C41 | -2.801560126  | -2.733279004  | -2.893299730 |
| C42 | -1.954197648  | -3.991625474  | -3.171367745 |
| C43 | -1.366712265  | -4.102674493  | -4.574721439 |
| C44 | -5.939434809  | 0.597333660   | -2.955997640 |
| C45 | -7.307319865  | 0.508969129   | -2.278566361 |
| C46 | -5.891686389  | 1.580866145   | -4.157895726 |
| C47 | -9.264450443  | -0.883705309  | -1.812950488 |
| C48 | -9.074373551  | -1.102564929  | -0.304969627 |
| C49 | -7.521159501  | -1.559663095  | 1.537987892  |
| C50 | -6.693345382  | -0.471880771  | 2.225460614  |
| C51 | -5.424524721  | 1.620417578   | 2.057236020  |
| C52 | -6.255956324  | 2.587847340   | 2.926086763  |
| C53 | -4.721264640  | 2.470953739   | 0.986058133  |
| C54 | -3.741980492  | 1.774790332   | 0.088705278  |
| C55 | -2.921943359  | 0.682629406   | 0.293837489  |
| C56 | -2.570761670  | 1.508278689   | -1.723946633 |
| C57 | -8.393092392  | 3.816374035   | 3.058128093  |
| C58 | -8.605345913  | 3.570560978   | 4.549378198  |
| C59 | -9.733047792  | 3.780251721   | 2.287359214  |
| C60 | -10.561141681 | 5.031132120   | 2.337209873  |
| C61 | -10.824141048 | 5.901035107   | 3.377549452  |
| C62 | -11.858034915 | 6.566558279   | 1.533814218  |
| C63 | 7.936481765   | 1.898159710   | 5.731308348  |
| C64 | 9.135997198   | 0.997097765   | 5.507851292  |
| C65 | 6.719931635   | 1.198191854   | 5.072706670  |
| C66 | 5.434499371   | 1.969419864   | 5.254036971  |
| C67 | 4.638615039   | 1.804197108   | 6.403572834  |
| C68 | 4.992446005   | 2.874419639   | 4.273031313  |
| C69 | 3.438823359   | 2.507235724   | 6.565486084  |
| C70 | 3.806112377   | 3.593464420   | 4.425755514  |
| C71 | 3.026736017   | 3.405278825   | 5.571919037  |
| C72 | 4.166483990   | 8.111113870   | 1.760803302  |
| C73 | 2.937090769   | 8.967285050   | 1.433882640  |

|      |              |              |               |
|------|--------------|--------------|---------------|
| C74  | 3.895859516  | 6.641138330  | 1.398903424   |
| C75  | 1.881241911  | 10.475636434 | -0.186053441  |
| C76  | 0.624373538  | 9.724017519  | -0.624226496  |
| C77  | -0.384796408 | 7.616574512  | -1.388882944  |
| C78  | -1.155334073 | 7.036387775  | -0.186448265  |
| C79  | 0.089987558  | 6.531396482  | -2.372341056  |
| C80  | -0.959604056 | 5.556964332  | -2.920357454  |
| C81  | -1.979783820 | 6.111448314  | -3.931383881  |
| C82  | -3.711373559 | 7.801661879  | -3.308715963  |
| C83  | -1.085544110 | 6.059329910  | 2.054681683   |
| C84  | -1.554458732 | 7.116820234  | 3.074281367   |
| C85  | -0.221747313 | 5.023543550  | 2.778039466   |
| C86  | -0.991296955 | 9.203251013  | 4.221936493   |
| C87  | -1.915077385 | 10.414587511 | 4.115934328   |
| C88  | -3.494798912 | 11.700077028 | 2.733902350   |
| C89  | -4.945816413 | 11.650098389 | 3.260465031   |
| C90  | -3.472429872 | 12.057647199 | 1.229701178   |
| C91  | -4.128045605 | 10.974452885 | 0.380014320   |
| C92  | -6.777983124 | 10.213545292 | 4.062904386   |
| C93  | -7.089317513 | 10.884129109 | 5.394846360   |
| C94  | -7.052035142 | 8.686646008  | 4.162490420   |
| C95  | -6.885771212 | 7.966651210  | 2.841937151   |
| C96  | -7.941318191 | 7.917736984  | 1.917216774   |
| C97  | -5.670352909 | 7.352217253  | 2.489909867   |
| C98  | -7.791036474 | 7.294278656  | 0.675947106   |
| C99  | -5.495282740 | 6.741899359  | 1.244628147   |
| C100 | -6.561855868 | 6.718524787  | 0.346152525   |
| C101 | 6.214232148  | -0.478403992 | -8.613284914  |
| C102 | 4.720684246  | -0.648300489 | -8.383066330  |
| C103 | 2.798753928  | 0.134272111  | -7.007813605  |
| C104 | 2.119713080  | 1.481992891  | -7.275907871  |
| C105 | 1.945618637  | 3.821666167  | -6.578315095  |
| C106 | 2.874810457  | 5.001588974  | -6.311459602  |
| C107 | 4.936134379  | 5.876895612  | -5.342142495  |
| C108 | 5.888073964  | 6.373000980  | -6.410655082  |
| C109 | -0.422875148 | -1.115346315 | -10.067961374 |
| C110 | -1.692017877 | -0.319393406 | -9.731969133  |
| C111 | -0.067837874 | -2.062950699 | -8.897503568  |
| C112 | 0.942040217  | -3.137533777 | -9.345377923  |
| C113 | 1.539887559  | -3.856006562 | -8.156721716  |
| C114 | -2.662407434 | 1.640587181  | -8.624116913  |
| C115 | -2.356362419 | 3.113102421  | -8.821683965  |
| C116 | -3.210639645 | 1.279707323  | -7.219277675  |
| C117 | -2.125667750 | 1.081867407  | -6.188949716  |
| C118 | -1.541589580 | 2.168486493  | -5.514810771  |
| C119 | -1.622597556 | -0.206729411 | -5.940829395  |
| C120 | -0.473473199 | 1.967713545  | -4.631918888  |
| C121 | -0.548282151 | -0.405401598 | -5.067091759  |
| C122 | 0.037892117  | 0.683842731  | -4.416954010  |
| C123 | 9.582282153  | -3.248029517 | -4.293238243  |
| C124 | 10.592768283 | -3.423850986 | -3.145481143  |
| C125 | 8.275379933  | -4.015050467 | -4.031551247  |
| C126 | 7.158113750  | -3.750362094 | -4.995569641  |
| C127 | 7.139762300  | -3.976569502 | -6.357061922  |
| C128 | 5.125524046  | -3.332425339 | -5.694737464  |
| C129 | 11.830850333 | -4.890554223 | -1.652242343  |
| C130 | 13.149324970 | -4.190975498 | -1.895284108  |
| C131 | 2.054010711  | -6.750946661 | -1.779594394  |
| C132 | 3.307074993  | -6.202626689 | -1.153295742  |
| C133 | 4.436975190  | -5.854562109 | -2.202542500  |
| C134 | 4.734593450  | -7.111769824 | -3.066124464  |
| C135 | 5.924522943  | -6.897533216 | -4.014222858  |

|       |              |              |              |
|-------|--------------|--------------|--------------|
| C136  | 6.397886392  | -8.155464574 | -4.684055676 |
| C137  | 5.725157143  | -5.548294973 | -1.376227743 |
| C138  | 3.990276529  | 0.646714203  | -1.497125029 |
| Fe139 | 4.622311634  | -0.221880732 | -3.156756216 |
| Fe140 | 2.460192154  | 2.029014001  | -1.042821543 |
| Fe141 | 4.955020280  | 1.721131529  | -0.159194747 |
| Fe142 | 4.492577499  | 2.250833278  | -2.642189001 |
| Fe143 | 3.967873926  | 4.152844861  | -0.722896986 |
| Fe144 | 5.063875328  | -0.849188868 | -0.708336952 |
| Fe145 | 2.482836634  | -0.614306739 | -1.303332261 |
| H146  | -4.401433512 | -7.861583520 | -2.855763810 |
| H147  | -4.599387017 | -6.679754846 | -3.965118172 |
| H148  | -8.486815119 | -6.177339701 | -2.399281235 |
| H149  | -6.956330228 | -6.942759618 | -3.996225310 |
| H150  | -6.802764325 | -8.364415663 | -2.966770818 |
| H151  | -7.448759262 | -4.283944166 | -0.590261751 |
| H152  | -8.328074882 | -7.682572720 | 0.124373888  |
| H153  | -9.119814991 | -4.894069047 | -0.606936444 |
| H154  | -8.092711234 | -8.872822239 | 2.106425089  |
| H155  | -5.728759426 | -7.729480378 | 0.577865960  |
| H156  | -8.264661434 | -7.353869614 | 3.018296645  |
| H157  | -2.684440857 | -3.783008371 | 1.863460066  |
| H158  | -4.677300422 | -5.511311221 | 0.699176886  |
| H159  | -3.432418238 | -8.065301464 | 0.798476420  |
| H160  | -5.807295873 | -2.873179733 | 5.305100028  |
| H161  | -5.999638901 | -4.678835814 | 3.054897733  |
| H162  | -3.622316766 | -8.470350964 | 2.522403964  |
| H163  | -4.254307147 | -3.287582359 | 1.189239832  |
| H164  | -5.194576731 | -6.444765249 | 5.053003507  |
| H165  | -6.936160608 | -4.242728850 | 5.122326350  |
| H166  | 0.170532157  | -4.530906988 | 2.784375750  |
| H167  | 0.052376031  | -3.164580154 | 1.655710915  |
| H168  | 1.477200683  | -3.316265667 | 2.700687245  |
| H169  | -1.402583260 | -2.744528956 | 3.622404382  |
| H170  | -4.626673062 | -7.895155856 | 6.753339307  |
| H171  | -2.994363172 | -0.112912511 | 4.890931674  |
| H172  | -3.192107584 | -3.222548705 | 8.078519494  |
| H173  | -4.127429999 | 0.074790178  | 9.104328873  |
| H174  | -0.218600903 | -0.775803655 | 2.601934481  |
| H175  | 1.074502787  | -0.936162055 | 3.791237372  |
| H176  | 7.752888928  | 1.939976624  | 6.822382683  |
| H177  | -4.279212582 | 0.960119383  | 5.470301236  |
| H178  | -4.916807900 | 1.071453034  | 7.856927988  |
| H179  | -2.581302909 | 1.328934908  | 5.857955336  |
| H180  | -3.251861924 | 1.436643944  | 8.366651867  |
| H181  | -4.164536617 | -1.104203838 | 6.886540285  |
| H182  | -1.326238727 | -0.133096773 | 7.521118481  |
| H183  | -2.302994339 | -2.183777868 | 5.696280520  |
| H184  | -0.575739724 | -0.526831839 | 4.321280133  |
| H185  | 0.107882593  | 4.265169323  | 2.047137296  |
| H186  | -0.859826120 | 4.533626772  | 3.531008847  |
| H187  | 1.191727973  | 5.114909907  | 4.136418540  |
| H188  | 1.365742043  | 3.865348333  | 6.468645839  |
| H189  | 3.467755350  | 4.270516504  | 3.640947084  |
| H190  | 5.565342985  | 2.993564955  | 3.351209459  |
| H191  | 4.952814261  | 1.105196295  | 7.183514630  |
| H192  | -1.533315692 | -4.575987057 | 5.333495967  |
| H193  | -0.332987199 | -7.568331470 | 4.986991618  |
| H194  | -0.261757256 | -7.335733218 | 6.748305232  |
| H195  | -2.547347593 | -6.646498232 | 4.978266948  |
| H196  | -4.628086182 | -6.549652305 | 7.917358674  |
| H197  | 2.821989900  | 2.349624754  | 7.454043734  |

|      |               |              |               |
|------|---------------|--------------|---------------|
| H198 | 1.145372962   | -3.283336801 | 5.207275533   |
| H199 | -3.515885953  | -3.024013669 | 10.822918101  |
| H200 | -3.128536220  | -4.534332846 | 9.961190383   |
| H201 | -0.560984089  | -3.613654054 | 10.189983079  |
| H202 | 11.562828294  | -5.950321332 | 4.566977589   |
| H203 | 0.323679843   | -4.695415180 | -5.568080892  |
| H204 | 2.685891329   | -8.512404546 | -1.313296179  |
| H205 | 0.427868572   | -3.880114320 | -9.972601318  |
| H206 | 1.741374817   | -2.674148040 | -9.942279910  |
| H207 | -0.975414068  | -2.556911183 | -8.518595876  |
| H208 | -1.651695273  | 3.322995831  | -9.661372693  |
| H209 | -0.732714826  | -1.742513033 | -10.918556027 |
| H210 | -2.383293618  | -1.869218874 | -3.430743500  |
| H211 | -2.558651945  | -4.900076972 | -2.997920268  |
| H212 | -0.589602972  | 1.105517199  | -8.709442716  |
| H213 | -3.463407899  | 1.424941399  | -9.358235429  |
| H214 | 1.093909733   | 0.269073444  | -9.770836981  |
| H215 | 0.427433503   | -4.835025416 | -3.815252704  |
| H216 | 0.333675741   | -1.464571324 | -8.065161714  |
| H217 | 1.388295629   | -0.804440226 | -10.983537868 |
| H218 | -5.330576912  | -3.444655296 | -4.912441405  |
| H219 | -2.713624734  | -2.506400015 | -1.822077598  |
| H220 | 3.106958410   | -2.663773511 | -8.297943051  |
| H221 | -1.131747858  | -4.016361234 | -2.442626916  |
| H222 | -4.689044074  | 1.161757600  | 2.733131678   |
| H223 | -2.796167351  | 0.014285664  | 1.139848333   |
| H224 | -8.479852509  | -1.614382161 | 2.071421261   |
| H225 | -7.030513574  | -1.439392231 | -0.538877856  |
| H226 | -7.884417672  | 2.196998000  | 1.745635910   |
| H227 | -10.494286554 | 5.924933215  | 4.409914230   |
| H228 | -8.620055498  | 2.489931224  | 4.832523344   |
| H229 | -10.319708977 | 2.904412830  | 2.616284880   |
| H230 | -7.915710369  | 4.801851104  | 2.932222691   |
| H231 | -12.476924056 | 7.175830930  | 0.881000811   |
| H232 | -4.214558374  | 3.291130093  | 1.520779433   |
| H233 | -5.489614128  | 2.942747286  | 0.352453328   |
| H234 | -12.020338983 | 7.674348515  | 3.345429919   |
| H235 | -9.491983272  | 3.611356946  | 1.226268937   |
| H236 | -6.432383351  | 0.582002409  | 0.460553285   |
| H237 | -7.006767367  | -2.516950589 | 1.704200602   |
| H238 | -9.993179460  | -0.067561935 | -1.915349663  |
| H239 | -2.138504444  | 1.625812965  | -2.713652218  |
| H240 | -9.722960586  | -1.789666037 | -2.233446654  |
| H241 | 8.825861610   | 3.743308072  | 5.697611604   |
| H242 | 7.319347233   | 3.731575968  | 5.062495826   |
| H243 | 0.599023069   | 6.590442413  | 0.822047258   |
| H244 | -1.997820065  | 5.552134926  | 1.710730814   |
| H245 | -0.037167525  | 8.387341591  | 2.523152208   |
| H246 | -4.301334304  | 3.694173796  | -1.835651656  |
| H247 | -5.795912082  | 3.360605359  | -3.269606156  |
| H248 | -5.383432640  | 4.834989128  | -1.537158503  |
| H249 | -4.835982417  | 1.606180526  | -4.487007174  |
| H250 | -6.489597269  | 1.167455248  | -4.986695508  |
| H251 | -2.426062242  | 12.227295031 | 0.934391673   |
| H252 | -4.034175302  | 12.990935667 | 1.097477663   |
| H253 | -2.267594124  | 10.166074799 | -0.188660335  |
| H254 | -3.683766584  | 9.244514267  | -0.619687642  |
| H255 | -3.546268490  | 9.724636271  | -3.983241926  |
| H256 | -2.244358087  | 5.326209567  | -4.654375794  |
| H257 | -8.628490213  | 7.254266966  | -0.025033573  |
| H258 | -4.833954579  | 7.331354135  | 3.194473227   |
| H259 | -5.227715213  | 7.379414159  | -1.980539557  |



|      |              |               |               |
|------|--------------|---------------|---------------|
| H260 | 0.875036524  | 5.932473164   | -1.883229752  |
| H261 | 1.675465059  | 7.954506657   | -0.875270353  |
| H262 | -1.492297940 | 5.046521086   | -2.103566723  |
| H263 | -7.664019155 | -1.292647076  | -3.182872107  |
| H264 | 2.218457123  | 11.091386613  | -1.031397728  |
| H265 | -5.176937555 | -0.892659693  | -4.376376055  |
| H266 | 0.579567704  | 7.047965874   | -3.214903106  |
| H267 | -4.532543020 | 6.310425870   | 0.965597254   |
| H268 | 1.563641187  | 11.154113158  | 0.617610333   |
| H269 | -2.559125431 | 8.589029709   | -4.820863600  |
| H270 | -5.341327319 | 8.909143793   | -2.775830734  |
| H271 | -3.699047616 | -3.201412538  | -5.159504401  |
| H272 | -4.684287825 | -3.755664284  | -2.726775252  |
| H273 | -8.903254858 | 8.370263206   | 2.170118412   |
| H274 | -5.275574246 | 0.996819049   | -2.175204771  |
| H275 | -1.101222178 | 8.290147223   | -1.879133104  |
| H276 | -1.528015524 | 6.925611650   | -4.512422510  |
| H277 | -0.387454686 | 4.773214704   | -3.436487815  |
| H278 | -3.802405671 | 5.821009761   | -2.851130241  |
| H279 | -1.328890345 | 8.626699709   | 5.096263397   |
| H280 | -2.553720148 | 9.822571331   | 2.256848091   |
| H281 | -3.020376165 | 12.523402190  | 3.287756620   |
| H282 | 0.011167196  | 9.595533552   | 4.441496134   |
| H283 | -4.757050825 | 9.648885173   | 3.611753745   |
| H284 | 6.503993119  | 0.564751283   | -8.416789212  |
| H285 | 6.711530549  | -1.101500867  | -7.841532811  |
| H286 | 9.362314065  | -2.170746408  | -4.313605850  |
| H287 | 7.578196707  | -0.950959163  | -10.053801184 |
| H288 | 6.156882061  | -1.752804390  | -10.198609203 |
| H289 | 4.791636829  | 6.064506028   | 1.662619737   |
| H290 | 3.698408720  | 8.022492562   | 3.737249488   |
| H291 | 3.777553663  | 9.497949007   | -0.360022911  |
| H292 | 3.052167588  | 6.269970947   | 1.999897115   |
| H293 | 4.815806756  | 9.160467385   | 3.393278107   |
| H294 | 5.523990192  | 5.562786639   | -4.465556821  |
| H295 | 5.019147740  | 8.465004041   | 1.160243040   |
| H296 | 5.686065345  | -6.847093941  | 4.116860791   |
| H297 | 8.015519962  | -6.880766609  | 2.125178062   |
| H298 | 4.363383931  | 3.830961435   | -5.454565498  |
| H299 | 4.081428533  | 0.003461233   | 4.323895598   |
| H300 | 1.567900416  | 3.926032555   | -7.603076488  |
| H301 | -0.160965450 | -1.411351673  | -4.892050986  |
| H302 | 1.081227004  | 3.962232056   | -5.908553439  |
| H303 | 4.222757659  | -4.602309907  | 3.832868091   |
| H304 | 3.066788017  | 2.222390250   | -5.624203178  |
| H305 | 4.534907047  | -4.579032784  | 2.098952876   |
| H306 | 5.590740696  | -6.752752824  | 2.344086337   |
| H307 | 6.989192990  | -4.573501069  | 2.501663441   |
| H308 | 6.727889534  | -4.620572148  | 4.255170772   |
| H309 | -3.794699238 | 0.354142133   | -7.320353174  |
| H310 | 6.821259592  | -9.071257713  | 3.789739980   |
| H311 | 6.644304648  | -11.133119501 | 1.559009288   |
| H312 | 0.871155865  | 0.532452562   | -3.728506997  |
| H313 | 7.589542861  | -11.427830081 | 4.307515612   |
| H314 | 6.208361442  | -11.973727031 | 3.616210953   |
| H315 | 5.459753923  | -2.384947922  | 2.251034490   |
| H316 | -0.020128999 | 2.807464311   | -4.101471427  |
| H317 | -2.080132222 | -1.070736144  | -6.427867588  |
| H318 | 9.639273687  | -7.638169188  | -2.124085949  |
| H319 | 8.496310911  | -5.097496266  | -4.044895900  |
| H320 | 7.954111085  | -6.662969119  | -0.617771800  |
| H321 | 9.259571303  | -8.137462888  | -3.535515173  |

|       |              |               |              |
|-------|--------------|---------------|--------------|
| H322  | 5.809291222  | 5.857554201   | -7.398923915 |
| H323  | 7.223081480  | -3.656609052  | -0.164455232 |
| H324  | 3.718622262  | -6.901292685  | -0.410135105 |
| H325  | 4.813422230  | 0.727660268   | -6.861994918 |
| H326  | 4.949055020  | -7.954623776  | -2.390151427 |
| H327  | 5.494596414  | -3.807489323  | -7.721059727 |
| H328  | 4.071624928  | -3.083734619  | -5.732296210 |
| H329  | 8.289353242  | -11.534557395 | 2.065971725  |
| H330  | 4.790049382  | -0.325754062  | 2.737299956  |
| H331  | 9.181944323  | -4.292294288  | 1.070256097  |
| H332  | 7.658626310  | -2.281750839  | 0.409595336  |
| H333  | 9.654772854  | -5.703994996  | 2.942101760  |
| H334  | 4.088968663  | -3.330058645  | 5.436455868  |
| H335  | 5.827425236  | -9.571779457  | -5.800492615 |
| H336  | 5.634699550  | -6.169262268  | -4.786200298 |
| H337  | 6.784304247  | -6.491789689  | -3.470272121 |
| H338  | 3.838926434  | -7.357619323  | -3.654851095 |
| H339  | 2.772783866  | -0.117205791  | -5.934908961 |
| H340  | -1.929526698 | 3.175276991   | -5.691038774 |
| H341  | -3.900261744 | 2.084730389   | -6.922408713 |
| H342  | 3.050692128  | -5.259973844  | -0.652983157 |
| H343  | 9.584585043  | -5.713856532  | 0.595009172  |
| H344  | 8.816196777  | -7.747420264  | 0.082167851  |
| H345  | 3.394415230  | -1.779005921  | 5.684488356  |
| H346  | 7.920357236  | -4.302311397  | -7.033686251 |
| H347  | 7.921730512  | -3.787423518  | -3.018565549 |
| H348  | 2.266240192  | -0.632056866  | -7.575453692 |
| H349  | 4.304341285  | 6.723595639   | -5.028908215 |
| H350  | 6.627131014  | 0.198494366   | 5.523864922  |
| H351  | 6.926614471  | 1.063698964   | 3.999143520  |
| H352  | 10.992474139 | -3.012811527  | -5.764084391 |
| H353  | 10.526173114 | -4.567414503  | -5.565226475 |
| H354  | 12.041002820 | -5.970104961  | -1.589449164 |
| H355  | 10.396304635 | -5.513925993  | -3.095473018 |
| H356  | 13.416565048 | -4.034755676  | -2.967765530 |
| H357  | 11.419257589 | -4.572320613  | -0.680752320 |
| H358  | 9.627662973  | 1.128248642   | 4.513497163  |
| H359  | -6.199654633 | 11.125878056  | 6.024076266  |
| H360  | 10.336251452 | -6.263677794  | 5.820992318  |
| H361  | 9.541123150  | -3.706475001  | 5.112937055  |
| H362  | -7.447966507 | 10.653756017  | 3.306918039  |
| H363  | -6.377660367 | 8.252453840   | 4.917704970  |
| H364  | -8.078998437 | 8.566816721   | 4.536243677  |
| H365  | -7.207380449 | 6.071035504   | -1.373001734 |
| H366  | 0.104640347  | -1.712352278  | -0.005194282 |
| H367  | 2.550404100  | -2.662203375  | -0.568996018 |
| H368  | -1.433348093 | -0.155983869  | -1.045574127 |
| H369  | 1.651528761  | 0.675605313   | -1.729349949 |
| M0370 | 4.870616358  | -2.881031356  | -2.546229376 |
| N371  | 2.086568331  | -0.194941330  | 1.563681790  |
| N372  | 2.235258418  | -0.332056000  | 0.453451193  |
| N373  | -4.986997868 | -7.569902157  | -3.643261654 |
| N374  | -7.778937639 | -6.070546888  | -1.676869773 |
| N375  | -8.016718907 | -7.154696554  | 0.936153546  |
| N376  | -5.375766643 | -7.894146063  | 1.520853047  |
| N377  | -4.061605929 | -5.338059000  | 1.495299156  |
| N378  | -5.396130170 | -4.199015001  | 3.727118726  |
| N379  | -4.838068387 | -6.008232813  | 5.907273533  |
| N380  | -2.047331910 | -6.738017572  | 5.869069977  |
| N381  | -0.521456706 | -4.474910430  | 5.383882098  |
| N382  | -1.632218499 | -1.865161504  | 6.398492518  |
| N383  | -2.677091702 | -2.832968291  | 8.870925650  |

|      |               |               |               |
|------|---------------|---------------|---------------|
| N384 | 6.846878148   | -11.177677778 | 3.650748698   |
| N385 | 7.340912118   | -8.615669650  | 3.031853627   |
| N386 | 5.036354253   | -2.815938003  | 3.077466667   |
| N387 | 3.803993505   | -2.443083349  | 5.034695132   |
| N388 | 4.368008850   | -0.677172390  | 3.627009189   |
| N389 | 9.550098034   | -6.053476495  | 3.918882794   |
| N390 | -4.540239655  | -2.840545931  | -4.674969498  |
| N391 | -0.109225179  | -4.585008628  | -4.646953955  |
| N392 | -5.425714974  | -0.694400032  | -3.396126315  |
| N393 | -8.059680356  | -0.589201992  | -2.564565354  |
| N394 | -7.813027273  | -1.378289204  | 0.127817288   |
| N395 | -6.238544296  | 0.562878366   | 1.462193859   |
| N396 | -3.511839819  | 2.282158823   | -1.181092148  |
| N397 | -2.197973150  | 0.526916155   | -0.869473754  |
| N398 | -7.537626701  | 2.768873985   | 2.512557249   |
| N399 | -11.213208660 | 5.458370179   | 1.191707628   |
| N400 | -11.649135708 | 6.870717751   | 2.846239290   |
| N401 | 8.191939830   | 3.198049299   | 5.108723000   |
| N402 | 4.540507454   | 8.197324358   | 3.178728708   |
| N403 | 2.990462868   | 9.660129277   | 0.263523975   |
| N404 | 0.762414877   | 8.428663674   | -0.984496158  |
| N405 | -3.239023410  | 6.559807414   | -3.322928362  |
| N406 | -3.126070269  | 8.800749961   | -4.007040051  |
| N407 | -4.759109978  | 8.118836819   | -2.511168477  |
| N408 | -0.420467173  | 6.615154342   | 0.880636667   |
| N409 | -0.898922601  | 8.314397349   | 3.072075546   |
| N410 | -2.707757184  | 10.499813516  | 3.006184848   |
| N411 | -3.281349591  | 10.025954668  | -0.102322183  |
| N412 | -5.393066126  | 10.440273868  | 3.675477204   |
| N413 | 6.564112103   | -0.835927342  | -9.991525462  |
| N414 | 4.186913838   | 0.163075033   | -7.452963135  |
| N415 | 2.483218197   | 2.479462051   | -6.439806135  |
| N416 | 4.099934319   | 4.769090431   | -5.773018464  |
| N417 | 0.655093126   | -0.240437976  | -10.547998405 |
| N418 | -1.521110685  | 0.845791931   | -9.049050619  |
| N419 | 10.174385027  | -3.605362010  | -5.596705840  |
| N420 | 5.883890473   | -3.339598640  | -4.602806402  |
| N421 | 5.853822167   | -3.707488517  | -6.775580863  |
| N422 | 10.888881337  | -4.691582425  | -2.742712461  |
| N423 | -0.223055846  | 2.851942401   | -0.183867898  |
| N424 | 0.784262415   | 2.490040960   | -0.551056476  |
| O425 | -5.589592351  | -6.351525200  | -1.110805351  |
| O426 | -7.456696638  | -5.113999009  | 1.778282787   |
| O427 | -5.889368733  | -7.875751141  | 3.749747579   |
| O428 | -2.668046977  | -6.211949314  | 3.066530385   |
| O429 | -3.547096026  | -2.926499992  | 4.080039721   |
| O430 | -4.785178667  | -4.140945608  | 7.225058698   |
| O431 | -2.205892292  | -7.186692563  | 8.115471662   |
| O432 | 1.445501884   | -5.640972324  | 5.622431289   |
| O433 | 0.550843669   | -1.763596008  | 7.060975644   |
| O434 | -1.646196041  | -1.048053997  | 9.823139198   |
| O435 | -1.344985997  | -3.741056125  | 12.070058219  |
| O436 | 8.527885961   | -9.158476055  | 1.120839021   |
| O437 | 8.282153768   | -7.291447274  | 5.383749276   |
| O438 | 11.468363220  | -3.636101266  | 5.776607199   |
| O439 | -5.275251625  | -1.663078897  | -1.319658684  |
| O440 | -2.007914935  | -3.785248880  | -5.602784860  |
| O441 | -7.673166869  | 1.368619841   | -1.461870379  |
| O442 | -6.398638256  | 2.869752292   | -3.886263414  |
| O443 | -10.065009082 | -1.051482489  | 0.439511489   |
| O444 | -6.465403539  | -0.556405153  | 3.438933145   |
| O445 | -5.757068620  | 3.213368218   | 3.868510268   |

|                  |                                       |              |               |              |             |
|------------------|---------------------------------------|--------------|---------------|--------------|-------------|
| O446             | -8.782956577                          | 4.450498624  | 5.375037498   |              |             |
| O447             | 9.536354712                           | 0.173492549  | 6.317824680   |              |             |
| O448             | 1.852388380                           | 4.125667127  | 5.665087268   |              |             |
| O449             | 1.948021999                           | 9.027503347  | 2.188717167   |              |             |
| O450             | -0.457259974                          | 10.345720846 | -0.663701239  |              |             |
| O451             | -2.393745768                          | 6.972428626  | -0.211366936  |              |             |
| O452             | -2.465145826                          | 6.843702948  | 3.868680816   |              |             |
| O453             | 0.894520353                           | 5.676509724  | 3.391384276   |              |             |
| O454             | -1.933316214                          | 11.253699572 | 5.026128356   |              |             |
| O455             | -5.637289020                          | 12.677288802 | 3.296002732   |              |             |
| O456             | -5.358308563                          | 10.924070079 | 0.223084142   |              |             |
| O457             | -8.226862177                          | 11.117649890 | 5.771043350   |              |             |
| O458             | -6.350600057                          | 6.122481664  | -0.906278660  |              |             |
| O459             | 4.073608104                           | -1.525944204 | -9.012120206  |              |             |
| O460             | 1.317315855                           | 1.632426873  | -8.222326102  |              |             |
| O461             | 2.461095259                           | 6.144704393  | -6.570480093  |              |             |
| O462             | 6.692852594                           | 7.271291571  | -6.221121874  |              |             |
| O463             | -2.816128686                          | -0.738193993 | -10.058621100 |              |             |
| O464             | 0.979531985                           | -4.768235018 | -7.558521070  |              |             |
| O465             | 2.741643352                           | -3.414814117 | -7.731666902  |              |             |
| O466             | -2.851535825                          | 4.021091647  | -8.170341368  |              |             |
| O467             | 11.182789405                          | -2.448180285 | -2.645349263  |              |             |
| O468             | 13.918294888                          | -3.879852156 | -0.995560708  |              |             |
| O469             | 1.167029165                           | -6.094198679 | -2.301151302  |              |             |
| O470             | 1.915672249                           | -8.118292505 | -1.765120264  |              |             |
| O471             | 7.532766012                           | -8.621967793 | -4.610467157  |              |             |
| O472             | 5.427456130                           | -8.763548730 | -5.414594916  |              |             |
| O473             | 6.210785893                           | -4.357944331 | -1.527542097  |              |             |
| O474             | 6.247855885                           | -6.439971642 | -0.668028274  |              |             |
| O475             | 4.074918547                           | -4.774317056 | -2.983011242  |              |             |
| O476             | 9.825430597                           | -5.019781885 | 1.265102141   |              |             |
| O477             | 7.708031280                           | -3.240030532 | 0.591993535   |              |             |
| O478             | -4.849780493                          | 4.440449058  | -2.260976875  |              |             |
| O479             | 10.039942512                          | -7.903568177 | -2.990648731  |              |             |
| O480             | 8.903185978                           | -6.962431887 | -0.519210622  |              |             |
| S481             | 3.510549086                           | 6.380466949  | -0.395133129  |              |             |
| S482             | 2.695144998                           | 3.642666885  | -2.573772000  |              |             |
| S483             | 2.969110388                           | -1.700562193 | -3.447125638  |              |             |
| S484             | 3.321092088                           | 2.797315987  | 0.917004783   |              |             |
| S485             | 0.379885894                           | -1.708793182 | -1.337140732  |              |             |
| S486             | 5.113233787                           | 1.440727947  | -4.599530678  |              |             |
| S487             | 3.900581907                           | -2.833304078 | -0.271942259  |              |             |
| S488             | 6.030736020                           | 3.317922574  | -1.298921835  |              |             |
| S489             | 6.516307401                           | -1.187171395 | -2.373791147  |              |             |
| S490             | 6.044473835                           | 0.142625454  | 1.010402010   |              |             |
| <b>24, 47(1)</b> | <b>bm2unh2b2n2x263b26n2ndta.car_2</b> |              |               |              |             |
| Fe1              | 2.77                                  | C1           | -5.487352189  | -2.881284377 | 7.108123282 |
| Fe2              | -1.00                                 | C2           | -5.504606099  | -4.370339366 | 7.468197933 |
| Fe3              | 2.86                                  | C3           | -6.834535863  | -0.858894821 | 6.743772006 |
| Fe4              | -2.18                                 | C4           | -6.094241976  | 0.120542787  | 7.652216752 |
| Fe5              | 2.52                                  | C5           | -5.259481858  | 0.633054917  | 9.889522354 |
| Fe6              | -0.34                                 | C6           | -3.751385356  | 0.676444917  | 9.619026796 |
| Fe7              | -2.24                                 | C7           | -1.809393537  | -0.498621138 | 8.698020527 |
|                  |                                       | C8           | -1.532743526  | 0.303351612  | 7.422257321 |
|                  |                                       | C9           | -2.325222728  | 0.994430955  | 5.221608204 |
|                  |                                       | C10          | -2.431116079  | 2.507698797  | 5.469186493 |
|                  |                                       | C11          | -3.445770181  | 4.320821314  | 6.722527286 |
|                  |                                       | C12          | -2.274070728  | 4.880127672  | 7.541877496 |
|                  |                                       | C13          | -0.885622363  | 4.639106288  | 9.541956442 |
|                  |                                       | C14          | 0.596853546   | 4.405966199  | 9.223730887 |
|                  |                                       | C15          | 2.280520428   | 2.899352966  | 8.249825769 |
|                  |                                       | C16          | 2.758265109   | 3.034214363  | 6.798943035 |

|     |               |              |               |
|-----|---------------|--------------|---------------|
| C17 | 2.040081993   | 3.539087001  | 4.465279442   |
| C18 | 1.821639477   | 5.007760122  | 4.060117742   |
| C19 | 1.208170291   | 2.531806249  | 3.643673991   |
| C20 | 1.204474601   | 2.902945089  | 2.161468768   |
| C21 | 1.729866972   | 1.112477746  | 3.889888324   |
| C22 | 0.228926257   | 6.839306006  | 3.692416370   |
| C23 | 0.693213319   | 7.872812749  | 4.735576150   |
| C24 | -1.268994587  | 6.981041778  | 3.328480123   |
| C25 | -1.615258467  | 8.432560294  | 2.976099022   |
| C26 | -1.635615707  | 6.050854807  | 2.163353499   |
| C27 | 0.775076026   | 8.535426525  | 7.067991606   |
| C28 | 2.248415377   | 8.887166729  | 7.035182035   |
| C29 | 9.674637805   | -3.243209144 | 8.741892807   |
| C30 | 9.716573629   | -2.999363541 | 7.235891420   |
| C31 | 9.306833446   | -1.236237217 | 5.512871126   |
| C32 | 10.444937982  | -0.217167562 | 5.318974309   |
| C33 | 7.926393938   | -0.607604623 | 5.261001729   |
| C34 | 7.777256226   | -0.010062822 | 3.861713736   |
| C35 | 6.313468720   | 0.278027986  | 3.532879416   |
| C36 | 5.634757590   | 1.970424767  | 1.814926646   |
| C37 | 12.363555429  | 0.409402351  | 3.930936368   |
| C38 | 12.166883293  | 1.284718305  | 2.711094693   |
| C39 | -4.382522241  | -3.159778614 | 2.776970870   |
| C40 | -5.136588314  | -2.009421660 | 2.090489367   |
| C41 | -2.898969725  | -3.098521792 | 2.370411227   |
| C42 | -1.941575738  | -3.973906343 | 3.203505392   |
| C43 | -1.745367804  | -5.398218302 | 2.693345769   |
| C44 | -6.598182603  | -1.474550783 | 0.189797494   |
| C45 | -7.791116178  | -0.715157118 | 0.781305662   |
| C46 | -6.990816776  | -2.131757226 | -1.148978987  |
| C47 | -9.100122414  | -0.197603794 | 2.779930855   |
| C48 | -8.471033529  | 1.077305193  | 3.360518197   |
| C49 | -6.405497467  | 2.297122489  | 3.896720573   |
| C50 | -5.610905626  | 3.154337265  | 2.912204690   |
| C51 | -4.829086352  | 3.492903714  | 0.605605551   |
| C52 | -5.564534675  | 4.778786422  | 0.152016660   |
| C53 | -4.582473596  | 2.672778431  | -0.670343859  |
| C54 | -3.762802515  | 1.426678279  | -0.541032755  |
| C55 | -2.767954262  | 1.013698379  | 0.313025834   |
| C56 | -3.022099855  | -0.570871721 | -1.210959151  |
| C57 | -7.783664152  | 5.766571342  | -0.307166160  |
| C58 | -7.554983568  | 7.072342844  | 0.452234757   |
| C59 | -9.246724973  | 5.286588939  | -0.167874215  |
| C60 | -10.248658420 | 5.939556079  | -1.074499381  |
| C61 | -10.377913896 | 7.253309246  | -1.482650997  |
| C62 | -11.978717126 | 6.005476821  | -2.372501626  |
| C63 | 8.708963650   | 4.421014371  | -2.055521905  |
| C64 | 9.938145628   | 3.651973666  | -1.607442083  |
| C65 | 7.504720475   | 3.805148709  | -1.297732313  |
| C66 | 6.197288827   | 4.495382473  | -1.604428715  |
| C67 | 5.781345584   | 5.627122336  | -0.880389026  |
| C68 | 5.350664101   | 4.014572517  | -2.619304331  |
| C69 | 4.563216112   | 6.260135074  | -1.155509607  |
| C70 | 4.138313289   | 4.640391553  | -2.912564067  |
| C71 | 3.745442290   | 5.762899189  | -2.179344698  |
| C72 | 2.933015694   | 3.754270104  | -7.957120001  |
| C73 | 1.523480365   | 4.000257060  | -8.510461186  |
| C74 | 2.850111403   | 2.977853540  | -6.632231111  |
| C75 | -0.183635334  | 3.282355464  | -10.120462628 |
| C76 | -1.359661797  | 2.835360013  | -9.252629640  |
| C77 | -2.128440081  | 1.571927869  | -7.285218896  |
| C78 | -2.419003202  | 2.586524165  | -6.161773550  |

|       |              |              |              |
|-------|--------------|--------------|--------------|
| C79   | -1.753810960 | 0.181282827  | -6.739355261 |
| C80   | -2.736535782 | -0.480578723 | -5.765216747 |
| C81   | -4.066499941 | -0.992696834 | -6.348510124 |
| C82   | -5.852146406 | 0.516101198  | -7.235683161 |
| C83   | -1.566260286 | 4.269312021  | -4.605047161 |
| C84   | -1.928209776 | 5.674196219  | -5.125894949 |
| C85   | -0.360637699 | 4.382031779  | -3.666066416 |
| C86   | -1.468670166 | 7.379822785  | -6.819848299 |
| C87   | -2.584672880 | 7.888877220  | -7.729837795 |
| C88   | -4.685206704 | 7.399574244  | -8.916887368 |
| C89   | -5.899593621 | 8.141525205  | -8.314798895 |
| C90   | -5.145619891 | 6.158781180  | -9.715874982 |
| C91   | -5.792303252 | 5.115269107  | -8.812952792 |
| C92   | -7.136698004 | 8.713240118  | -6.267648803 |
| C93   | -7.191191119 | 10.230233934 | -6.407088018 |
| C94   | -7.087693988 | 8.318722739  | -4.766492008 |
| C95   | -7.172544637 | 6.823408935  | -4.552513573 |
| C96   | -8.419904600 | 6.178864950  | -4.524309131 |
| C97   | -6.016854913 | 6.034066842  | -4.421213882 |
| C98   | -8.516370688 | 4.791732851  | -4.392301488 |
| C99   | -6.092884896 | 4.641906837  | -4.309309774 |
| C100  | -7.347834456 | 4.034395984  | -4.303523694 |
| C101  | 3.646961401  | -9.208890576 | -3.873139889 |
| C102  | 2.333844982  | -8.772507275 | -3.245722250 |
| C103  | 0.729557088  | -6.885221202 | -3.030341407 |
| C104  | -0.243700621 | -6.502119246 | -4.150152248 |
| C105  | -0.647615655 | -5.005183874 | -6.041702031 |
| C106  | 0.076985320  | -4.461948537 | -7.268196313 |
| C107  | 2.120412858  | -3.621168983 | -8.308390913 |
| C108  | 2.686248089  | -4.591809457 | -9.325847861 |
| C109  | -2.901576221 | -9.499987281 | -1.960069294 |
| C110  | -4.156005590 | -8.658389307 | -2.232583376 |
| C111  | -2.062577893 | -8.843870650 | -0.838570866 |
| C112  | -1.029707842 | -9.833852235 | -0.268665480 |
| C113  | -0.026632101 | -9.117530094 | 0.604985388  |
| C114  | -5.134845738 | -6.745432279 | -3.412106140 |
| C115  | -5.182134737 | -6.459086036 | -4.901098321 |
| C116  | -5.204882389 | -5.487059368 | -2.509694990 |
| C117  | -3.865394664 | -4.819712036 | -2.317006822 |
| C118  | -3.349260354 | -3.919578247 | -3.265271786 |
| C119  | -3.071348705 | -5.151324284 | -1.206453447 |
| C120  | -2.063351620 | -3.387012901 | -3.111454569 |
| C121  | -1.784875101 | -4.623724320 | -1.056776012 |
| C122  | -1.272759702 | -3.743774545 | -2.013806535 |
| C123  | 8.521611737  | -6.900671515 | -0.898574598 |
| C124  | 9.813836568  | -6.102294483 | -0.645575043 |
| C125  | 7.503948568  | -6.720633858 | 0.242360602  |
| C126  | 6.138258012  | -7.288314907 | -0.004044678 |
| C127  | 5.797556670  | -8.607272849 | -0.228842976 |
| C128  | 3.951642949  | -7.390600679 | -0.079646956 |
| C129  | 11.671263304 | -5.535054282 | 0.813567929  |
| C130  | 12.719238731 | -5.745830982 | -0.256901596 |
| C131  | 2.704493349  | -4.442804412 | 5.042205595  |
| C132  | 3.969452311  | -3.924242880 | 4.413802442  |
| C133  | 4.684293292  | -4.980207663 | 3.478646839  |
| C134  | 4.958374867  | -6.280855551 | 4.283627636  |
| C135  | 5.782157019  | -7.304332386 | 3.487098452  |
| C136  | 6.280177121  | -8.456251677 | 4.314598122  |
| C137  | 6.067424291  | -4.357486326 | 3.114048271  |
| C138  | 3.275685786  | -1.893052113 | -2.086449183 |
| Fe139 | 3.582492656  | -3.855879664 | -2.022844523 |
| Fe140 | 1.651637240  | -0.700273772 | -2.777700178 |

|       |              |              |              |
|-------|--------------|--------------|--------------|
| Fe141 | 4.409109064  | -0.476944229 | -2.939550030 |
| Fe142 | 3.124297719  | -2.409120250 | -4.030862192 |
| Fe143 | 2.674040562  | -0.046092181 | -5.126731988 |
| Fe144 | 4.798385714  | -1.941045076 | -0.840723744 |
| Fe145 | 2.115633855  | -1.812083723 | -0.435180022 |
| H146  | -3.483441219 | -4.636964989 | 7.490768106  |
| H147  | -4.191572062 | -5.175849289 | 6.121345810  |
| H148  | -7.539222725 | -2.818304653 | 7.232556213  |
| H149  | -6.382802672 | -4.845201708 | 7.003077799  |
| H150  | -5.673875824 | -4.421015009 | 8.558335842  |
| H151  | -6.445883738 | -0.687755671 | 5.729940920  |
| H152  | -6.421389568 | -1.077051809 | 9.288309706  |
| H153  | -7.902916331 | -0.602788220 | 6.751454072  |
| H154  | -5.426716763 | 0.259445659  | 10.908388056 |
| H155  | -3.815550724 | -1.210735830 | 8.810080747  |
| H156  | -5.620259699 | 1.668256430  | 9.837246492  |
| H157  | -1.347612592 | 0.823211420  | 4.752000016  |
| H158  | -3.229068164 | -0.464560157 | 6.523285490  |
| H159  | -1.526462820 | -1.548271412 | 8.537455234  |
| H160  | -3.500189604 | 4.906218854  | 5.796443288  |
| H161  | -3.963717626 | 2.232696637  | 6.833837061  |
| H162  | -1.167157209 | -0.082405409 | 9.483370241  |
| H163  | -3.105680888 | 0.675187682  | 4.516309377  |
| H164  | -2.356196284 | 3.262296871  | 8.830567931  |
| H165  | -4.376612781 | 4.470310224  | 7.287232084  |
| H166  | 1.759607431  | 0.876994024  | 4.964079347  |
| H167  | 1.082042733  | 0.363633693  | 3.410484698  |
| H168  | 2.741994849  | 0.980839604  | 3.478178005  |
| H169  | 0.171737634  | 2.584714935  | 4.011288576  |
| H170  | -1.085822812 | 4.182029129  | 10.522520560 |
| H171  | -1.487904918 | 4.991197283  | 2.414177412  |
| H172  | -0.203953077 | 6.811273568  | 6.284923102  |
| H173  | -1.436809660 | 9.121669029  | 3.813688654  |
| H174  | 0.652279895  | 2.151016878  | 1.583360314  |
| H175  | 2.222328421  | 2.937166613  | 1.752626712  |
| H176  | 8.827954651  | 5.468031236  | -1.716808836 |
| H177  | -2.693744577 | 6.185473843  | 1.894673533  |
| H178  | -2.676283766 | 8.504565808  | 2.694433690  |
| H179  | -1.026247821 | 6.287628021  | 1.276027571  |
| H180  | -1.012432939 | 8.779517423  | 2.121554801  |
| H181  | -1.862928090 | 6.687101682  | 4.212596655  |
| H182  | 0.832339243  | 7.061101696  | 2.798555898  |
| H183  | -0.226307908 | 4.841609495  | 4.354916902  |
| H184  | 0.728656439  | 3.877124514  | 1.984464657  |
| H185  | -0.095512995 | 3.371118973  | -3.310911783 |
| H186  | -0.675995944 | 4.990217666  | -2.802017284 |
| H187  | 1.311227292  | 5.411933631  | -3.690820092 |
| H188  | 2.338712768  | 7.072313056  | -1.891922207 |
| H189  | 3.481241524  | 4.235012247  | -3.682519959 |
| H190  | 5.624994478  | 3.112611976  | -3.169199593 |
| H191  | 6.409785282  | 6.016255169  | -0.074077827 |
| H192  | 0.856450321  | 3.503605409  | 6.252319562  |
| H193  | 2.438172133  | 1.849704830  | 8.542804525  |
| H194  | 2.936635322  | 3.526424790  | 8.868016517  |
| H195  | 0.174011178  | 2.598026845  | 8.290248728  |
| H196  | -1.010659763 | 5.725142220  | 9.637835727  |
| H197  | 4.245737866  | 7.127391675  | -0.568882668 |
| H198  | 3.109443679  | 3.348680272  | 4.310757688  |
| H199  | 0.185502074  | 9.465837215  | 7.023487309  |
| H200  | 0.581255511  | 8.060916678  | 8.043340013  |
| H201  | 2.908278594  | 8.115129946  | 6.576392482  |
| H202  | 13.279409318 | -0.187076466 | 3.803614689  |

|      |               |               |               |
|------|---------------|---------------|---------------|
| H203 | -0.319325748  | -6.852544957  | 2.488225644   |
| H204 | 3.743563379   | -4.836777992  | 6.619335464   |
| H205 | -1.547321253  | -10.584497392 | 0.345766638   |
| H206 | -0.512637525  | -10.353998813 | -1.087786912  |
| H207 | -2.716770144  | -8.502548896  | -0.021513875  |
| H208 | -4.829367006  | -7.306027129  | -5.535423661  |
| H209 | -3.306907291  | -10.441293381 | -1.558363889  |
| H210 | -2.808035592  | -3.352955484  | 1.303383161   |
| H211 | -2.299340823  | -4.045556905  | 4.245872637   |
| H212 | -3.100382266  | -7.419815830  | -3.517148573  |
| H213 | -6.045574703  | -7.345964473  | -3.217863383  |
| H214 | -1.652012832  | -9.030983951  | -3.549230169  |
| H215 | 0.278199926   | -5.339305600  | 3.164526550   |
| H216 | -1.568750146  | -7.946073022  | -1.241380012  |
| H217 | -1.529101378  | -10.589832453 | -3.028622900  |
| H218 | -5.656557577  | -4.741261579  | 3.161144886   |
| H219 | -2.569259326  | -2.055423440  | 2.476583311   |
| H220 | 1.210347419   | -9.102674649  | -0.930398692  |
| H221 | -0.965068542  | -3.470185430  | 3.239323158   |
| H222 | -3.878306150  | 3.828610250   | 1.043375898   |
| H223 | -2.341692440  | 1.493590571   | 1.185808559   |
| H224 | -7.155328141  | 2.952585441   | 4.360358306   |
| H225 | -6.547745895  | 0.348554652   | 3.028228200   |
| H226 | -7.342653365  | 3.943230367   | 0.733082120   |
| H227 | -9.789194384  | 8.141054882   | -1.281924087  |
| H228 | -7.299385473  | 6.926349076   | 1.529957363   |
| H229 | -9.556491367  | 5.372836158   | 0.889187208   |
| H230 | -7.534956996  | 5.931297468   | -1.367585579  |
| H231 | -12.854366885 | 5.745891083   | -2.961230126  |
| H232 | -4.090730314  | 3.345546553   | -1.391824163  |
| H233 | -5.556483185  | 2.407917065   | -1.114255558  |
| H234 | -11.853239872 | 8.090685848   | -2.786346427  |
| H235 | -9.261825996  | 4.211385824   | -0.407683858  |
| H236 | -5.981635626  | 1.838002150   | 1.367666081   |
| H237 | -5.720937212  | 1.981378595   | 4.698053698   |
| H238 | -9.931169435  | 0.121589390   | 2.137608606   |
| H239 | -2.883864903  | -1.484112630  | -1.782686449  |
| H240 | -9.521385878  | -0.781564001  | 3.609038783   |
| H241 | 9.216184805   | 4.865241525   | -3.991436310  |
| H242 | 7.617970323   | 4.589337957   | -3.780038207  |
| H243 | -0.410420106  | 3.034122498   | -5.940502183  |
| H244 | -2.426981689  | 3.938310421   | -4.007029275  |
| H245 | -0.861005635  | 5.358311869   | -6.854603188  |
| H246 | -4.564127193  | 0.446445260   | -2.285599435  |
| H247 | -6.544232428  | -0.102412720  | -3.089608117  |
| H248 | -6.438516038  | 1.409402699   | -3.577866878  |
| H249 | -6.100357680  | -2.590775231  | -1.600483574  |
| H250 | -7.742136893  | -2.920355766  | -0.974913537  |
| H251 | -4.276731824  | 5.752811338   | -10.253893058 |
| H252 | -5.891417033  | 6.493073335   | -10.448523256 |
| H253 | -4.052362781  | 3.925493188   | -8.785877296  |
| H254 | -5.334243416  | 3.467952500   | -7.693495028  |
| H255 | -6.214263841  | 0.581358935   | -9.249864306  |
| H256 | -4.376309455  | -1.905389132  | -5.819083780  |
| H257 | -9.495396501  | 4.306229535   | -4.365291838  |
| H258 | -5.026887808  | 6.498704170   | -4.398051690  |
| H259 | -6.841832821  | 1.872384723   | -6.035476226  |
| H260 | -0.776310442  | 0.251933411   | -6.234927108  |
| H261 | -0.104057657  | 1.797639796   | -7.971300319  |
| H262 | -2.937169387  | 0.175421425   | -4.904241773  |
| H263 | -7.725353984  | -1.822911562  | 2.483704348   |
| H264 | -0.198149082  | 2.681394565   | -11.039540661 |



|      |              |               |               |
|------|--------------|---------------|---------------|
| H265 | -5.973093480 | -3.441398716  | 0.971277138   |
| H266 | -1.604824975 | -0.482116801  | -7.607306460  |
| H267 | -5.184415113 | 4.038841010   | -4.264455593  |
| H268 | -8.029789473 | -0.523840680  | -1.522940893  |
| H269 | -0.387398443 | 4.325926363   | -10.398697451 |
| H270 | -5.299099850 | -0.786919320  | -8.731283967  |
| H271 | -7.446560704 | 1.727906225   | -7.646938441  |
| H272 | -4.263661848 | -5.169813714  | 2.345620390   |
| H273 | -4.435164063 | -2.931834638  | 3.858714072   |
| H274 | -9.336621244 | 6.766972016   | -4.603453789  |
| H275 | -5.869427315 | -0.676759987  | -0.030108277  |
| H276 | -3.061635749 | 1.516729540   | -7.861750209  |
| H277 | -3.924990176 | -1.277486253  | -7.399025975  |
| H278 | -2.208465402 | -1.355591781  | -5.362025163  |
| H279 | -5.445080495 | 0.231135992   | -5.268701534  |
| H280 | -1.468154199 | 8.032822126   | -5.934160866  |
| H281 | -3.575361051 | 6.093152575   | -7.610947793  |
| H282 | -4.239107505 | 8.115209898   | -9.623082066  |
| H283 | -0.525528416 | 7.544220573   | -7.358243272  |
| H284 | -5.254164407 | 7.692598439   | -6.431944889  |
| H285 | 3.793149030  | -8.696429825  | -4.834684111  |
| H286 | 4.441535753  | -8.841161879  | -3.191511662  |
| H287 | 8.098056088  | -6.472516628  | -1.818980431  |
| H288 | 4.616651309  | -10.953426347 | -4.284646163  |
| H289 | 3.396819382  | -11.115089107 | -3.202816585  |
| H290 | 3.872734424  | 2.807800095   | -6.272692393  |
| H291 | 3.067600775  | 5.649399589   | -7.222132220  |
| H292 | 1.745277700  | 2.417407150   | -9.795687802  |
| H293 | 2.309370138  | 3.581152628   | -5.887722732  |
| H294 | 3.836856195  | 5.455076980   | -8.649727144  |
| H295 | 2.941502226  | -3.009054786  | -7.905119150  |
| H296 | 3.498486610  | 3.142776521   | -8.677511996  |
| H297 | 7.740913824  | 0.162596694   | 6.027987476   |
| H298 | 9.447627780  | -2.084865521  | 4.832630226   |
| H299 | 1.935363869  | -4.399391287  | -6.338844593  |
| H300 | 5.049790318  | 3.109090531   | 0.215150670   |
| H301 | -1.271693001 | -5.844684529  | -6.375658868  |
| H302 | -1.172293167 | -4.905629745  | -0.197803813  |
| H303 | -1.340486140 | -4.210122520  | -5.720630342  |
| H304 | 5.872232786  | 0.990264508   | 4.242233452   |
| H305 | 0.989581243  | -4.941137817  | -4.605404105  |
| H306 | 5.722756882  | -0.647943770  | 3.614616844   |
| H307 | 7.183095481  | -1.407609410  | 5.409411941   |
| H308 | 8.159981154  | -0.711845807  | 3.105683588   |
| H309 | 8.363445104  | 0.918343537   | 3.772635349   |
| H310 | -5.604470526 | -5.804666422  | -1.536072148  |
| H311 | 9.182106960  | -1.121358774  | 7.660485843   |
| H312 | 8.800096408  | -3.886246984  | 8.921657676   |
| H313 | -0.267461400 | -3.332715295  | -1.903868372  |
| H314 | 10.460460420 | -1.639445997  | 9.769262470   |
| H315 | 9.066455626  | -2.208137970  | 10.414484682  |
| H316 | 6.271956882  | 0.104206412   | 1.413069592   |
| H317 | -1.649748437 | -2.698138651  | -3.851268978  |
| H318 | -3.460646264 | -5.831422929  | -0.445762700  |
| H319 | 9.975810320  | -6.557342079  | 3.771938361   |
| H320 | 7.916642725  | -7.189418184  | 1.152966411   |
| H321 | 8.611018617  | -4.512041094  | 3.785424396   |
| H322 | 9.326972242  | -7.952571702  | 3.897317520   |
| H323 | 2.414761300  | -5.663272481  | -9.163537436  |
| H324 | 7.482883668  | -2.850473306  | 1.375479720   |
| H325 | 4.683620648  | -3.591159565  | 5.181176764   |
| H326 | 2.546295813  | -6.920852911  | -4.100011305  |

|       |              |              |              |
|-------|--------------|--------------|--------------|
| H327  | 5.503251200  | -6.008145484 | 5.200480193  |
| H328  | 3.845912950  | -9.479398847 | -0.385510112 |
| H329  | 2.898901512  | -7.136279784 | -0.043508238 |
| H330  | 10.565275948 | -3.846584679 | 8.987911055  |
| H331  | 5.385423234  | 1.420629227  | -0.160266467 |
| H332  | 9.784788228  | -2.335262900 | 1.832578448  |
| H333  | 7.851619334  | -1.940943163 | 0.170448005  |
| H334  | 10.998499748 | -1.219698296 | 3.582784023  |
| H335  | 5.968691688  | 2.937461201  | 3.598637540  |
| H336  | 5.699230030  | -9.880035657 | 5.417058890  |
| H337  | 5.166673538  | -7.697295222 | 2.664002539  |
| H338  | 6.668376036  | -6.833091071 | 3.048298597  |
| H339  | 3.997208080  | -6.730883742 | 4.571819382  |
| H340  | 1.035015777  | -5.998570485 | -2.451839904 |
| H341  | -3.955468393 | -3.654633487 | -4.135600812 |
| H342  | -5.933800276 | -4.802295115 | -2.969331038 |
| H343  | 3.703749377  | -3.071443416 | 3.774963577  |
| H344  | 10.303397929 | -3.357473805 | 2.879283187  |
| H345  | 9.796579993  | -4.424009297 | 4.780011234  |
| H346  | 5.118139225  | 3.854478578  | 2.416640264  |
| H347  | 6.415164161  | -9.487831586 | -0.356190765 |
| H348  | 7.402019597  | -5.650975309 | 0.463109897  |
| H349  | 0.220425483  | -7.591955937 | -2.372076309 |
| H350  | 1.428088967  | -2.945449870 | -8.835259384 |
| H351  | 7.722460294  | 3.868058045  | -0.220949487 |
| H352  | 7.434038891  | 2.738698381  | -1.564405280 |
| H353  | 9.409174643  | -8.396679569 | -1.986442319 |
| H354  | 9.340122558  | -8.722666712 | -0.384869083 |
| H355  | 12.094446425 | -5.911356009 | 1.758512456  |
| H356  | 10.052354085 | -6.826015710 | 1.311318037  |
| H357  | 12.641873294 | -6.712735731 | -0.810632865 |
| H358  | 11.482273613 | -4.457121380 | 0.938259225  |
| H359  | 10.113286132 | 2.702727695  | -2.170787501 |
| H360  | -6.233707656 | 10.712794682 | -6.713618365 |
| H361  | 12.514053259 | 1.085012951  | 4.790539417  |
| H362  | 11.103379028 | 1.501829179  | 2.445822379  |
| H363  | -8.060243387 | 8.311356749  | -6.716184006 |
| H364  | -6.160810858 | 8.715034286  | -4.321693670 |
| H365  | -7.929429289 | 8.824484298  | -4.271216414 |
| H366  | -8.338982095 | 2.365858059  | -4.149637016 |
| H367  | 0.462650826  | -0.638316285 | 1.724347783  |
| H368  | 2.625463975  | -1.960146888 | 1.389048033  |
| H369  | -1.494905656 | -0.777606437 | 0.266154947  |
| H370  | 0.955708964  | -1.708106705 | -1.551147790 |
| Mo371 | 4.456340884  | -4.311175446 | 0.536354672  |
| N372  | 2.366491510  | 1.071283920  | 0.025877348  |
| N373  | 2.224991745  | -0.020043104 | -0.217904246 |
| N374  | -4.309460129 | -5.126039048 | 7.136130931  |
| N375  | -6.698185781 | -2.256943152 | 7.125084215  |
| N376  | -5.995480622 | -0.212754260 | 8.962220590  |
| N377  | -3.201342724 | -0.457963926 | 9.118117497  |
| N378  | -2.456975979 | 0.197953083  | 6.433135989  |
| N379  | -3.320218081 | 2.905791839  | 6.410921636  |
| N380  | -1.856578851 | 4.122733448  | 8.590195677  |
| N381  | 0.903046022  | 3.283579244  | 8.511426367  |
| N382  | 1.803990771  | 3.383453075  | 5.899776192  |
| N383  | 0.541163580  | 5.474558109  | 4.120616829  |
| N384  | 0.408619569  | 7.589840013  | 6.032553634  |
| N385  | 9.538800007  | -2.012401014 | 9.530941114  |
| N386  | 9.368493860  | -1.751737380 | 6.872505508  |
| N387  | 6.143987665  | 0.782722699  | 2.168594740  |
| N388  | 5.434681271  | 2.943408839  | 2.735196311  |

|      |               |               |              |
|------|---------------|---------------|--------------|
| N389 | 5.271152896   | 2.175035994   | 0.546597534  |
| N390 | 11.222919992  | -0.433714192  | 4.229498686  |
| N391 | -5.001921374  | -4.446694461  | 2.433888659  |
| N392 | -0.497419898  | -5.892883793  | 2.797697899  |
| N393 | -5.968226899  | -2.414446599  | 1.092315688  |
| N394 | -8.186939280  | -1.038940043  | 2.028365682  |
| N395 | -7.106823637  | 1.150010759   | 3.344267179  |
| N396 | -5.569752315  | 2.736312283   | 1.608194902  |
| N397 | -3.903028745  | 0.409813418   | -1.477607009 |
| N398 | -2.335161832  | -0.224167193  | -0.119713504 |
| N399 | -6.918343191  | 4.728816482   | 0.246100937  |
| N400 | -11.253985213 | 5.170717527   | -1.637975910 |
| N401 | -11.483001513 | 7.273575055   | -2.308379764 |
| N402 | 8.548055025   | 4.264974126   | -3.501826359 |
| N403 | 3.672055961   | 5.006160116   | -7.744007227 |
| N404 | 1.129802025   | 3.178880245   | -9.521461528 |
| N405 | -1.086599841  | 2.022893353   | -8.205834789 |
| N406 | -5.176600855  | -0.038071173  | -6.233257953 |
| N407 | -5.679392451  | 0.128185398   | -8.515886933 |
| N408 | -6.684824423  | 1.556818499   | -6.995555866 |
| N409 | -1.361769984  | 3.279063531   | -5.657247640 |
| N410 | -1.519826110  | 5.990074122   | -6.388845108 |
| N411 | -3.645252901  | 7.054747993   | -7.948069563 |
| N412 | -4.953275956  | 4.151623763   | -8.346466969 |
| N413 | -5.981221494  | 8.165671539   | -6.962491137 |
| N414 | 3.658261272   | -10.660217521 | -4.082385485 |
| N415 | 1.913550980   | -7.537800588  | -3.575324108 |
| N416 | 0.153071238   | -5.466940070  | -4.921143000 |
| N417 | 1.420337591   | -4.273100681  | -7.215341357 |
| N418 | -2.192586834  | -9.832024046  | -3.201180905 |
| N419 | -4.022088241  | -7.635498455  | -3.122514540 |
| N420 | 8.803976771   | -8.325003221  | -1.162822181 |
| N421 | 4.962934785   | -6.540899311  | 0.078326166  |
| N422 | 4.420010292   | -8.648114857  | -0.270674768 |
| N423 | 10.452179056  | -6.280990801  | 0.545501308  |
| N424 | -0.764619551  | 0.941509504   | -2.571788731 |
| N425 | 0.168274831   | 0.298598939   | -2.632230120 |
| O426 | -4.433853761  | -2.258841211  | 6.878026449  |
| O427 | -5.617637376  | 1.169978395   | 7.190326949  |
| O428 | -3.089829865  | 1.694815280   | 9.878747213  |
| O429 | -0.523715321  | 1.017337500   | 7.310495793  |
| O430 | -1.730155989  | 3.312787781   | 4.835758297  |
| O431 | -1.775068247  | 5.984903911   | 7.268447885  |
| O432 | 1.445105359   | 5.202134991   | 9.647267536  |
| O433 | 3.943960112   | 2.811083387   | 6.514626164  |
| O434 | 2.769690928   | 5.719974688   | 3.698013183  |
| O435 | 1.295804015   | 8.908864605   | 4.409629323  |
| O436 | 2.702199155   | 9.907894783   | 7.530760170  |
| O437 | 10.031804404  | -3.931451848  | 6.465589586  |
| O438 | 10.611356008  | 0.713818616   | 6.126231057  |
| O439 | 13.093424805  | 1.741364907   | 2.060134211  |
| O440 | -5.005816281  | -0.812978671  | 2.422907496  |
| O441 | -2.688145674  | -6.076362697  | 2.222920955  |
| O442 | -8.316305335  | 0.203574985   | 0.115357352  |
| O443 | -7.502111605  | -1.158995781  | -2.073890361 |
| O444 | -9.206183538  | 1.958756179   | 3.820238686  |
| O445 | -5.052554727  | 4.183984689   | 3.297807126  |
| O446 | -4.947715488  | 5.724744136   | -0.345550053 |
| O447 | -7.655646508  | 8.183151503   | -0.037614609 |
| O448 | 10.671240863  | 3.995791778   | -0.691366109 |
| O449 | 2.529556562   | 6.334714088   | -2.500454658 |
| O450 | 0.780136546   | 4.893753496   | -8.062166607 |

|                  |              |                                       |                                       |
|------------------|--------------|---------------------------------------|---------------------------------------|
| O451             | -2.509718194 | 3.205354609                           | -9.565629262                          |
| O452             | -3.581151705 | 2.740005127                           | -5.750960450                          |
| O453             | -2.533040342 | 6.466403948                           | -4.389462197                          |
| O454             | 0.729748501  | 4.995353048                           | -4.360154965                          |
| O455             | -2.512717221 | 9.026799915                           | -8.209946960                          |
| O456             | -6.736497481 | 8.680830706                           | -9.052316738                          |
| O457             | -6.980051035 | 5.202846919                           | -8.464165261                          |
| O458             | -8.195290655 | 10.883433380                          | -6.175668237                          |
| O459             | -7.402693651 | 2.631154984                           | -4.234619831                          |
| O460             | 1.730081223  | -9.531098408                          | -2.443532422                          |
| O461             | -1.307194016 | -7.132204112                          | -4.336582001                          |
| O462             | -0.603037575 | -4.187820275                          | -8.270950304                          |
| O463             | 3.387058565  | -4.242617151                          | -10.261749802                         |
| O464             | -5.228197283 | -8.894038152                          | -1.650506710                          |
| O465             | -0.245600193 | -8.796968441                          | 1.768930627                           |
| O466             | 1.145344810  | -8.786762617                          | 0.025756195                           |
| O467             | -5.601907557 | -5.424896439                          | -5.399629869                          |
| O468             | 10.305800366 | -5.371989350                          | -1.525212609                          |
| O469             | 13.636629322 | -4.964046583                          | -0.462219027                          |
| O470             | 1.602559625  | -4.472083157                          | 4.515401353                           |
| O471             | 2.819293055  | -4.931366258                          | 6.319328579                           |
| O472             | 7.459328610  | -8.768269043                          | 4.467556632                           |
| O473             | 5.277523967  | -9.160077155                          | 4.900546999                           |
| O474             | 6.248496093  | -4.112024938                          | 1.854445229                           |
| O475             | 6.925251481  | -4.158853997                          | 4.003091290                           |
| O476             | 3.929556072  | -5.222658054                          | 2.347951766                           |
| O477             | 10.579563349 | -2.538390050                          | 2.388482309                           |
| O478             | 8.076395186  | -2.103203055                          | 1.107596747                           |
| O479             | -5.944903626 | 0.556322208                           | -3.536896756                          |
| O480             | 10.167085120 | -7.520099112                          | 3.639051461                           |
| O481             | 9.587259925  | -4.705108181                          | 3.850593254                           |
| S482             | 1.999291118  | 1.340908257                           | -6.820035900                          |
| S483             | 1.152658725  | -1.627535740                          | -4.746282642                          |
| S484             | 2.201704752  | -4.300005359                          | -0.312220701                          |
| S485             | 2.879224257  | 1.182582074                           | -3.249436250                          |
| S486             | 0.218930399  | -1.800566455                          | 1.058084925                           |
| S487             | 3.269831445  | -4.623988309                          | -4.096125285                          |
| S488             | 4.046044406  | -1.996988144                          | 1.347944893                           |
| S489             | 4.650429245  | -1.213361722                          | -5.113595988                          |
| S490             | 5.754205055  | -3.885051792                          | -1.389791430                          |
| S491             | 6.087713615  | -0.253977686                          | -1.484683238                          |
| <b>24, 47(2)</b> |              |                                       |                                       |
| Fe1              | 2.76         | <b>bm2unh2b2n2x263b26n2n472.car_1</b> |                                       |
| Fe2              | -1.01        | C1                                    | -5.488949175 -2.882958036 7.107221556 |
| Fe3              | 2.88         | C2                                    | -5.504277528 -4.371217917 7.468458218 |
| Fe4              | -2.14        | C3                                    | -6.834861184 -0.861788446 6.739623739 |
| Fe5              | 2.48         | C4                                    | -6.092883360 0.117667617 7.647685194  |
| Fe6              | -0.22        | C5                                    | -5.260962691 0.629926802 9.886947742  |
| Fe7              | -2.35        | C6                                    | -3.752922586 0.674881836 9.617630770  |
|                  |              | C7                                    | -1.808309074 -0.498490048 8.700199093 |
|                  |              | C8                                    | -1.530194522 0.303397374 7.424109441  |
|                  |              | C9                                    | -2.320780863 0.995613310 5.223348036  |
|                  |              | C10                                   | -2.426493225 2.508829421 5.473049207  |
|                  |              | C11                                   | -3.443883151 4.319941612 6.726421256  |
|                  |              | C12                                   | -2.272450023 4.880409216 7.545832971  |
|                  |              | C13                                   | -0.879558289 4.639840850 9.542608892  |
|                  |              | C14                                   | 0.601981847 4.408387634 9.218901306   |
|                  |              | C15                                   | 2.284396334 2.900402422 8.246040038   |
|                  |              | C16                                   | 2.760520205 3.043921827 6.796356279   |
|                  |              | C17                                   | 2.038030779 3.537134960 4.464709388   |
|                  |              | C18                                   | 1.816655357 5.005565194 4.054763793   |
|                  |              | C19                                   | 1.209582053 2.525310681 3.647229825   |

|     |               |              |               |
|-----|---------------|--------------|---------------|
| C20 | 1.206652226   | 2.896817941  | 2.164624600   |
| C21 | 1.734724791   | 1.107960173  | 3.893281266   |
| C22 | 0.222889452   | 6.838544351  | 3.695311166   |
| C23 | 0.688996019   | 7.869379608  | 4.739628640   |
| C24 | -1.275394623  | 6.979931443  | 3.332746500   |
| C25 | -1.622179131  | 8.432367130  | 2.985356474   |
| C26 | -1.642035977  | 6.053015144  | 2.164491407   |
| C27 | 0.774135662   | 8.528694472  | 7.073521800   |
| C28 | 2.246679673   | 8.886110363  | 7.036851610   |
| C29 | 9.669072707   | -3.249709778 | 8.741591482   |
| C30 | 9.715256211   | -3.005193865 | 7.234981546   |
| C31 | 9.307319701   | -1.240425818 | 5.510524743   |
| C32 | 10.446021215  | -0.220552807 | 5.315971096   |
| C33 | 7.927569351   | -0.609436978 | 5.259490750   |
| C34 | 7.780052506   | -0.004455485 | 3.862889305   |
| C35 | 6.315799530   | 0.286074215  | 3.534828525   |
| C36 | 5.624893785   | 1.980501905  | 1.821721786   |
| C37 | 12.363679242  | 0.408978552  | 3.925547407   |
| C38 | 12.168899821  | 1.282801972  | 2.704353574   |
| C39 | -4.382831413  | -3.164336877 | 2.777675534   |
| C40 | -5.134160333  | -2.013465756 | 2.089200037   |
| C41 | -2.899237085  | -3.104742075 | 2.373601164   |
| C42 | -1.942289213  | -3.979606331 | 3.206153936   |
| C43 | -1.746553861  | -5.404422824 | 2.695573863   |
| C44 | -6.593828497  | -1.477218705 | 0.187766351   |
| C45 | -7.784369563  | -0.715915670 | 0.782615329   |
| C46 | -6.993085057  | -2.133735179 | -1.149637801  |
| C47 | -9.094583669  | -0.204748134 | 2.781753006   |
| C48 | -8.467451770  | 1.072972935  | 3.358493855   |
| C49 | -6.403434930  | 2.295826620  | 3.892808029   |
| C50 | -5.606688831  | 3.153073148  | 2.910198731   |
| C51 | -4.827703220  | 3.497335993  | 0.602790473   |
| C52 | -5.564408453  | 4.782382545  | 0.150482756   |
| C53 | -4.576690065  | 2.677088410  | -0.672678380  |
| C54 | -3.753511664  | 1.433571136  | -0.542530791  |
| C55 | -2.758542689  | 1.020883730  | 0.311530341   |
| C56 | -3.016427843  | -0.566341890 | -1.208800627  |
| C57 | -7.782441904  | 5.770679951  | -0.308098053  |
| C58 | -7.551052246  | 7.077223474  | 0.450420669   |
| C59 | -9.246807671  | 5.294904890  | -0.166110304  |
| C60 | -10.248109837 | 5.948045610  | -1.073035961  |
| C61 | -10.374927407 | 7.261128335  | -1.483706666  |
| C62 | -11.980478493 | 6.015262618  | -2.368220364  |
| C63 | 8.711141836   | 4.416276066  | -2.061386215  |
| C64 | 9.941708652   | 3.646624706  | -1.619032886  |
| C65 | 7.507930665   | 3.797307851  | -1.304507886  |
| C66 | 6.199417040   | 4.488997049  | -1.608673435  |
| C67 | 5.785245632   | 5.622528802  | -0.886257327  |
| C68 | 5.351301598   | 4.007764848  | -2.623055983  |
| C69 | 4.566849329   | 6.254627831  | -1.160434209  |
| C70 | 4.138254142   | 4.633526888  | -2.914889500  |
| C71 | 3.746818195   | 5.756049448  | -2.181074217  |
| C72 | 2.935639271   | 3.748576845  | -7.955443784  |
| C73 | 1.525998400   | 3.994818440  | -8.508716181  |
| C74 | 2.857425592   | 2.961217681  | -6.636642640  |
| C75 | -0.182427831  | 3.280387596  | -10.119179318 |
| C76 | -1.356987182  | 2.837330923  | -9.248020331  |
| C77 | -2.125517876  | 1.571435251  | -7.283396946  |
| C78 | -2.418153338  | 2.587689006  | -6.161304737  |
| C79 | -1.750282117  | 0.182173267  | -6.735186396  |
| C80 | -2.731571950  | -0.479479319 | -5.759486390  |
| C81 | -4.062068523  | -0.993443815 | -6.340355142  |

|       |              |              |              |
|-------|--------------|--------------|--------------|
| C82   | -5.847409361 | 0.515014708  | -7.228752138 |
| C83   | -1.566420806 | 4.277364765  | -4.609310151 |
| C84   | -1.930339233 | 5.682912788  | -5.129901087 |
| C85   | -0.360596928 | 4.388481253  | -3.671554876 |
| C86   | -1.472222918 | 7.390686041  | -6.823645777 |
| C87   | -2.589169827 | 7.896007568  | -7.733847517 |
| C88   | -4.689598557 | 7.401067447  | -8.917162349 |
| C89   | -5.904301156 | 8.141756143  | -8.314999251 |
| C90   | -5.148974245 | 6.158974246  | -9.712808005 |
| C91   | -5.795384066 | 5.116129051  | -8.807721142 |
| C92   | -7.138167460 | 8.714805171  | -6.265094295 |
| C93   | -7.193976022 | 10.232204433 | -6.402607802 |
| C94   | -7.091460963 | 8.318092899  | -4.764897199 |
| C95   | -7.176473808 | 6.823094210  | -4.554041189 |
| C96   | -8.423709047 | 6.178832544  | -4.521647904 |
| C97   | -6.020568253 | 6.033776485  | -4.428611481 |
| C98   | -8.519748673 | 4.791517910  | -4.389931273 |
| C99   | -6.095723704 | 4.641583251  | -4.317674118 |
| C100  | -7.350819557 | 4.034147009  | -4.305404626 |
| C101  | 3.648448921  | -9.211151172 | -3.868184078 |
| C102  | 2.335001215  | -8.775442991 | -3.241341468 |
| C103  | 0.732095587  | -6.884723752 | -3.026235062 |
| C104  | -0.240828003 | -6.499255796 | -4.145769331 |
| C105  | -0.641232961 | -4.998208673 | -6.036235037 |
| C106  | 0.087783596  | -4.467752716 | -7.266595139 |
| C107  | 2.130945939  | -3.632103760 | -8.309476161 |
| C108  | 2.687756651  | -4.610577044 | -9.323904791 |
| C109  | -2.903312498 | -9.501373033 | -1.963249007 |
| C110  | -4.158891052 | -8.660675636 | -2.237566498 |
| C111  | -2.067454148 | -8.847062580 | -0.839502855 |
| C112  | -1.033399866 | -9.835752411 | -0.269524363 |
| C113  | -0.029321300 | -9.119918374 | 0.604635604  |
| C114  | -5.135139898 | -6.747759457 | -3.421188659 |
| C115  | -5.176625844 | -6.457623212 | -4.909602020 |
| C116  | -5.207663379 | -5.490933995 | -2.517618831 |
| C117  | -3.868139073 | -4.825086979 | -2.317837982 |
| C118  | -3.349404688 | -3.919382040 | -3.259203544 |
| C119  | -3.076845885 | -5.163452313 | -1.207389459 |
| C120  | -2.064231243 | -3.387431552 | -3.099136809 |
| C121  | -1.790677580 | -4.636648603 | -1.051472530 |
| C122  | -1.276237399 | -3.751103581 | -2.002034871 |
| C123  | 8.518213961  | -6.902660471 | -0.895932060 |
| C124  | 9.809128157  | -6.103227891 | -0.643119258 |
| C125  | 7.497368315  | -6.715902303 | 0.241178098  |
| C126  | 6.131508676  | -7.286270903 | -0.005081952 |
| C127  | 5.788288939  | -8.605384888 | -0.228072827 |
| C128  | 3.944087428  | -7.385288436 | -0.082116602 |
| C129  | 11.668476207 | -5.534194585 | 0.815568626  |
| C130  | 12.717257160 | -5.745629324 | -0.253821726 |
| C131  | 2.701957476  | -4.441853733 | 5.050514489  |
| C132  | 3.966205000  | -3.918813862 | 4.424197516  |
| C133  | 4.680349244  | -4.970446435 | 3.482453412  |
| C134  | 4.957866201  | -6.271776672 | 4.287683019  |
| C135  | 5.784520130  | -7.292031696 | 3.489082440  |
| C136  | 6.279472297  | -8.450114215 | 4.310362366  |
| C137  | 6.063590276  | -4.345137071 | 3.117764487  |
| C138  | 3.273358857  | -1.893930765 | -2.087961057 |
| Fe139 | 3.659579896  | -3.851194915 | -2.055169900 |
| Fe140 | 1.646961067  | -0.711559718 | -2.775824858 |
| Fe141 | 4.402710066  | -0.471400739 | -2.941272094 |
| Fe142 | 3.127669307  | -2.417458783 | -4.040976294 |
| Fe143 | 2.662983763  | -0.048832088 | -5.117438063 |

|       |              |               |              |
|-------|--------------|---------------|--------------|
| Fe144 | 4.799219179  | -1.922407306  | -0.840293527 |
| Fe145 | 2.127865397  | -1.785105036  | -0.425825839 |
| H146  | -3.482250409 | -4.632032640  | 7.488767176  |
| H147  | -4.190241847 | -5.174852467  | 6.121107205  |
| H148  | -7.541985798 | -2.819583395  | 7.232655580  |
| H149  | -6.381312349 | -4.848666543  | 7.003815247  |
| H150  | -5.672441244 | -4.422079510  | 8.558817660  |
| H151  | -6.444986955 | -0.692864462  | 5.725769551  |
| H152  | -6.424235791 | -1.078427442  | 9.283665300  |
| H153  | -7.902712827 | -0.603050606  | 6.746788391  |
| H154  | -5.428779124 | 0.254020202   | 10.904732711 |
| H155  | -3.813352734 | -1.213052260  | 8.810998295  |
| H156  | -5.622588067 | 1.664878591   | 9.836449154  |
| H157  | -1.342962062 | 0.824348381   | 4.753404940  |
| H158  | -3.226079465 | -0.463747071  | 6.524147826  |
| H159  | -1.523626986 | -1.547846990  | 8.540452945  |
| H160  | -3.499001456 | 4.906072075   | 5.800837302  |
| H161  | -3.960679835 | 2.231772499   | 6.835174106  |
| H162  | -1.167723211 | -0.080806524  | 9.486086751  |
| H163  | -3.101085440 | 0.678115147   | 4.516958875  |
| H164  | -2.352038620 | 3.262702229   | 8.834784821  |
| H165  | -4.374433303 | 4.468151940   | 7.291533480  |
| H166  | 1.760923178  | 0.874588711   | 4.967595608  |
| H167  | 1.088707621  | 0.359675401   | 3.410895418  |
| H168  | 2.748543108  | 0.981594905   | 3.484034929  |
| H169  | 0.172132148  | 2.579566986   | 4.011329946  |
| H170  | -1.075717041 | 4.181588013   | 10.523207927 |
| H171  | -1.494223079 | 4.992427925   | 2.411939559  |
| H172  | -0.202307192 | 6.804549217   | 6.289357742  |
| H173  | -1.446788527 | 9.118177422   | 3.826305568  |
| H174  | 0.645901169  | 2.152824118   | 1.581961003  |
| H175  | 2.224692294  | 2.922697140   | 1.753025923  |
| H176  | 8.828876603  | 5.461628453   | -1.716740061 |
| H177  | -2.700425041 | 6.188399855   | 1.896737784  |
| H178  | -2.682446120 | 8.504448677   | 2.701278489  |
| H179  | -1.033240700 | 6.293062554   | 1.277535861  |
| H180  | -1.017810149 | 8.783104650   | 2.133398107  |
| H181  | -1.868887807 | 6.682264775   | 4.215913934  |
| H182  | 0.824871819  | 7.061560464   | 2.801055509  |
| H183  | -0.229973382 | 4.839887162   | 4.357589590  |
| H184  | 0.741323873  | 3.877485286   | 1.987070726  |
| H185  | -0.102803032 | 3.378277247   | -3.312397181 |
| H186  | -0.672741002 | 5.002082893   | -2.811323199 |
| H187  | 1.315841246  | 5.408615398   | -3.701379084 |
| H188  | 2.340276336  | 7.064778899   | -1.892952138 |
| H189  | 3.480548624  | 4.226849658   | -3.684156951 |
| H190  | 5.626272332  | 3.105849109   | -3.174339437 |
| H191  | 6.415863700  | 6.012747486   | -0.082522320 |
| H192  | 0.852408586  | 3.488765378   | 6.248460903  |
| H193  | 2.441775412  | 1.849282678   | 8.533446703  |
| H194  | 2.941042898  | 3.523233549   | 8.867616044  |
| H195  | 0.177856757  | 2.595941784   | 8.293362795  |
| H196  | -1.005096697 | 5.725536406   | 9.638961494  |
| H197  | 4.251424069  | 7.122529750   | -0.575329977 |
| H198  | 3.107790136  | 3.349586715   | 4.310927922  |
| H199  | 0.181188248  | 9.456730636   | 7.033093971  |
| H200  | 0.586592343  | 8.050589595   | 8.048190468  |
| H201  | 2.908634323  | 8.115452867   | 6.577515753  |
| H202  | 13.278775274 | -0.189182200  | 3.798800052  |
| H203  | -0.319540711 | -6.860711542  | 2.493746218  |
| H204  | 3.738401772  | -4.836654752  | 6.629783906  |
| H205  | -1.549148688 | -10.587324030 | 0.345577128  |

|      |               |               |               |
|------|---------------|---------------|---------------|
| H206 | -0.515345598  | -10.355607473 | -1.088402154  |
| H207 | -2.722713837  | -8.507239942  | -0.023118313  |
| H208 | -4.823889163  | -7.303404502  | -5.544964748  |
| H209 | -3.310006669  | -10.445219364 | -1.566092010  |
| H210 | -2.810097864  | -3.360393546  | 1.306937745   |
| H211 | -2.298359701  | -4.053254455  | 4.248618606   |
| H212 | -3.102370845  | -7.425390858  | -3.522689184  |
| H213 | -6.048998512  | -7.346674923  | -3.231462748  |
| H214 | -1.649795502  | -9.026328491  | -3.547322597  |
| H215 | 0.277080217   | -5.346184273  | 3.170951676   |
| H216 | -1.574699296  | -7.948828743  | -1.241728865  |
| H217 | -1.523766664  | -10.585081299 | -3.027870240  |
| H218 | -5.656217757  | -4.747442249  | 3.161946504   |
| H219 | -2.570087378  | -2.062018486  | 2.478971775   |
| H220 | 1.208420602   | -9.104481579  | -0.931222949  |
| H221 | -0.964978875  | -3.477632723  | 3.241509694   |
| H222 | -3.878487803  | 3.833769270   | 1.043757652   |
| H223 | -2.330995932  | 1.501133188   | 1.183493697   |
| H224 | -7.153961911  | 2.951272504   | 4.354993769   |
| H225 | -6.542925918  | 0.347470353   | 3.024395316   |
| H226 | -7.342936902  | 3.947202233   | 0.731116024   |
| H227 | -9.783839228  | 8.147869541   | -1.286204187  |
| H228 | -7.295232995  | 6.932059063   | 1.528557371   |
| H229 | -9.554996052  | 5.384677298   | 0.891037047   |
| H230 | -7.534742628  | 5.935287541   | -1.368614891  |
| H231 | -12.857808813 | 5.756571506   | -2.955422314  |
| H232 | -4.089180529  | 3.352106984   | -1.394469431  |
| H233 | -5.549217984  | 2.406671104   | -1.116093430  |
| H234 | -11.850678136 | 8.099192623   | -2.786952953  |
| H235 | -9.264161504  | 4.219334900   | -0.402842154  |
| H236 | -5.992683033  | 1.846931460   | 1.359605614   |
| H237 | -5.720429960  | 1.980117766   | 4.695214946   |
| H238 | -9.929659974  | 0.111012976   | 2.143131998   |
| H239 | -2.879632076  | -1.481625200  | -1.777638092  |
| H240 | -9.509454685  | -0.789106861  | 3.613578159   |
| H241 | 9.216502420   | 4.870808679   | -3.994819286  |
| H242 | 7.618372160   | 4.595069801   | -3.784220697  |
| H243 | -0.412147687  | 3.052194504   | -5.953216962  |
| H244 | -2.427743614  | 3.945744768   | -4.012582980  |
| H245 | -0.862768713  | 5.368928914   | -6.859143908  |
| H246 | -4.555850529  | 0.451587544   | -2.284983671  |
| H247 | -6.545448562  | -0.102019399  | -3.085211663  |
| H248 | -6.443268208  | 1.408481076   | -3.574890844  |
| H249 | -6.105168299  | -2.594065140  | -1.604641962  |
| H250 | -7.745129695  | -2.920921212  | -0.972486323  |
| H251 | -4.280160680  | 5.751519233   | -10.249451294 |
| H252 | -5.895412920  | 6.489792930   | -10.446200067 |
| H253 | -4.052932781  | 3.929626837   | -8.775735593  |
| H254 | -5.335692176  | 3.471125044   | -7.684171476  |
| H255 | -6.208086260  | 0.581173804   | -9.243005730  |
| H256 | -4.370681143  | -1.905131728  | -5.808364293  |
| H257 | -9.498797071  | 4.305700376   | -4.359935132  |
| H258 | -5.030808089  | 6.498479347   | -4.408745096  |
| H259 | -6.841821625  | 1.868116599   | -6.028922221  |
| H260 | -0.772302503  | 0.254147764   | -6.232081713  |
| H261 | -0.101748749  | 1.790835696   | -7.973261857  |
| H262 | -2.931100970  | 0.177006322   | -4.898702777  |
| H263 | -7.721652376  | -1.830096368  | 2.480866880   |
| H264 | -0.199088488  | 2.677071250   | -11.036991687 |
| H265 | -5.971028386  | -3.444628305  | 0.969574696   |
| H266 | -1.601368408  | -0.481764445  | -7.602405183  |
| H267 | -5.187026513  | 4.038257524   | -4.277274541  |



|      |              |               |               |
|------|--------------|---------------|---------------|
| H268 | -8.030901650 | -0.524057573  | -1.519697866  |
| H269 | -0.384160029 | 4.324011659   | -10.399693234 |
| H270 | -5.290446047 | -0.785540603  | -8.724860343  |
| H271 | -7.442584409 | 1.724949673   | -7.641842002  |
| H272 | -4.264745187 | -5.174015494  | 2.343216314   |
| H273 | -4.440129399 | -2.936371938  | 3.859334932   |
| H274 | -9.340805661 | 6.766844821   | -4.597086128  |
| H275 | -5.864594120 | -0.680532179  | -0.035025700  |
| H276 | -3.058600347 | 1.515385243   | -7.859980757  |
| H277 | -3.921713755 | -1.280605578  | -7.390491016  |
| H278 | -2.201952512 | -1.354056662  | -5.357067039  |
| H279 | -5.442993979 | 0.229274572   | -5.261409579  |
| H280 | -1.472590700 | 8.043429529   | -5.937659334  |
| H281 | -3.578184738 | 6.100353788   | -7.607897311  |
| H282 | -4.246155617 | 8.115885687   | -9.625005154  |
| H283 | -0.529004030 | 7.556045482   | -7.361698238  |
| H284 | -5.251534926 | 7.700846046   | -6.432284174  |
| H285 | 3.795006489  | -8.698561105  | -4.829612066  |
| H286 | 4.443546121  | -8.845370486  | -3.186410757  |
| H287 | 8.096567400  | -6.477743858  | -1.818390369  |
| H288 | 4.616916925  | -10.957735561 | -4.278897640  |
| H289 | 3.393444335  | -11.118876838 | -3.201009011  |
| H290 | 3.882288230  | 2.797368786   | -6.280434350  |
| H291 | 3.058111538  | 5.636568699   | -7.202486076  |
| H292 | 1.748723783  | 2.416367058   | -9.800708073  |
| H293 | 2.315075961  | 3.557255414   | -5.887715468  |
| H294 | 3.833556401  | 5.460899964   | -8.629041242  |
| H295 | 2.957250364  | -3.022807472  | -7.911985828  |
| H296 | 3.504122228  | 3.146870906   | -8.681851346  |
| H297 | 7.741804589  | 0.157569454   | 6.029326736   |
| H298 | 9.447216050  | -2.088440576  | 4.829196758   |
| H299 | 1.945785019  | -4.395478799  | -6.333431413  |
| H300 | 5.056099302  | 3.115190444   | 0.212688061   |
| H301 | -1.272122315 | -5.833724588  | -6.366878471  |
| H302 | -1.180473263 | -4.924026776  | -0.192435168  |
| H303 | -1.326752644 | -4.194840931  | -5.719242616  |
| H304 | 5.875696188  | 0.995795730   | 4.247687485   |
| H305 | 0.994213806  | -4.939432375  | -4.600220216  |
| H306 | 5.725177115  | -0.640437935  | 3.612813239   |
| H307 | 7.183541075  | -1.409407640  | 5.402554130   |
| H308 | 8.163051696  | -0.702257023  | 3.103332468   |
| H309 | 8.366081869  | 0.924666787   | 3.778868863   |
| H310 | -5.612840649 | -5.807998651  | -1.545809878  |
| H311 | 9.182590167  | -1.127013751  | 7.658218562   |
| H312 | 8.790508516  | -3.888247946  | 8.918961240   |
| H313 | -0.270021354 | -3.343309656  | -1.888656569  |
| H314 | 10.459352446 | -1.648763040  | 9.769176850   |
| H315 | 9.063835578  | -2.213453935  | 10.414263240  |
| H316 | 6.278347882  | 0.121612775   | 1.414629043   |
| H317 | -1.649335040 | -2.694160454  | -3.833582309  |
| H318 | -3.469004961 | -5.847392363  | -0.451522211  |
| H319 | 9.972532397  | -6.557398857  | 3.769748983   |
| H320 | 7.907669461  | -7.177995950  | 1.157086475   |
| H321 | 8.607764952  | -4.507310064  | 3.785852692   |
| H322 | 9.321992108  | -7.952130256  | 3.891660465   |
| H323 | 2.410651909  | -5.680033969  | -9.158083453  |
| H324 | 7.479297929  | -2.840067373  | 1.377804027   |
| H325 | 4.681158177  | -3.590090235  | 5.192924480   |
| H326 | 2.550110572  | -6.923110494  | -4.093379507  |
| H327 | 5.503355890  | -5.998913665  | 5.204633131   |
| H328 | 3.835240413  | -9.473303262  | -0.381701463  |
| H329 | 2.892775803  | -7.127488752  | -0.047451148  |

|       |              |              |              |
|-------|--------------|--------------|--------------|
| H330  | 10.555870242 | -3.858044232 | 8.989752274  |
| H331  | 5.372557801  | 1.420935983  | -0.149387396 |
| H332  | 9.784131434  | -2.331088738 | 1.832728568  |
| H333  | 7.846657140  | -1.933103016 | 0.172418247  |
| H334  | 10.997288751 | -1.219727497 | 3.577181791  |
| H335  | 5.959144137  | 2.958530205  | 3.601714662  |
| H336  | 5.693597152  | -9.879026222 | 5.402805048  |
| H337  | 5.170216958  | -7.678253915 | 2.661475259  |
| H338  | 6.672237274  | -6.817651923 | 3.056031799  |
| H339  | 3.999481507  | -6.727561512 | 4.578200138  |
| H340  | 1.040257770  | -5.998629599 | -2.447573194 |
| H341  | -3.954057123 | -3.649154101 | -4.128724016 |
| H342  | -5.932866756 | -4.804239009 | -2.980470436 |
| H343  | 3.699908814  | -3.063369724 | 3.789453173  |
| H344  | 10.299802717 | -3.356468431 | 2.875597752  |
| H345  | 9.795607416  | -4.426511255 | 4.779129391  |
| H346  | 5.077785526  | 3.855535185  | 2.427473597  |
| H347  | 6.403411019  | -9.488000319 | -0.356962548 |
| H348  | 7.390807750  | -5.644811027 | 0.454635414  |
| H349  | 0.221354566  | -7.590163252 | -2.367361575 |
| H350  | 1.441153553  | -2.954958833 | -8.837973165 |
| H351  | 7.725731569  | 3.858232485  | -0.227434838 |
| H352  | 7.434530508  | 2.730834788  | -1.572300872 |
| H353  | 9.403634448  | -8.408014182 | -1.970065464 |
| H354  | 9.326943686  | -8.723215259 | -0.367130754 |
| H355  | 12.090368282 | -5.907018232 | 1.762635162  |
| H356  | 10.050576486 | -6.826926920 | 1.313451302  |
| H357  | 12.642250606 | -6.714373623 | -0.804370481 |
| H358  | 11.478442034 | -4.455645891 | 0.936976684  |
| H359  | 10.118131669 | 2.700813537  | -2.187417468 |
| H360  | -6.236960078 | 10.715953550 | -6.709986760 |
| H361  | 12.514629623 | 1.084846555  | 4.784965010  |
| H362  | 11.106151136 | 1.491789495  | 2.430561104  |
| H363  | -8.060515838 | 8.313419281  | -6.716191864 |
| H364  | -6.166082269 | 8.714561842  | -4.317810122 |
| H365  | -7.934452323 | 8.823454190  | -4.272083178 |
| H366  | -8.341975710 | 2.365532841  | -4.150578091 |
| H367  | 0.441193459  | -0.658728001 | 1.743478376  |
| H368  | 2.577136790  | -2.005626698 | 1.334375392  |
| H369  | -1.483492524 | -0.772817699 | 0.262614352  |
| H370  | 0.968223587  | -1.702751542 | -1.536058122 |
| Mo371 | 4.459927209  | -4.315702510 | 0.529894490  |
| N372  | 2.369883713  | 1.115877480  | -0.014117860 |
| N373  | 2.238616538  | 0.016273016  | -0.224138264 |
| N374  | -4.307280220 | -5.124290303 | 7.136031814  |
| N375  | -6.700293765 | -2.259555452 | 7.122743432  |
| N376  | -5.996234707 | -0.214783462 | 8.958264708  |
| N377  | -3.200715005 | -0.458947442 | 9.118262076  |
| N378  | -2.452927864 | 0.197215893  | 6.434105204  |
| N379  | -3.316804148 | 2.905676301  | 6.414217391  |
| N380  | -1.853128205 | 4.123340034  | 8.593659734  |
| N381  | 0.907130331  | 3.282135888  | 8.512582596  |
| N382  | 1.802293296  | 3.382978793  | 5.898236843  |
| N383  | 0.536523306  | 5.472853917  | 4.119568368  |
| N384  | 0.409278596  | 7.583465297  | 6.036816894  |
| N385  | 9.536558733  | -2.018716921 | 9.530661049  |
| N386  | 9.369477639  | -1.757032327 | 6.870194056  |
| N387  | 6.145983760  | 0.796873535  | 2.172639464  |
| N388  | 5.420793591  | 2.952719914  | 2.741269250  |
| N389  | 5.252279308  | 2.178622070  | 0.554335854  |
| N390  | 11.221939823 | -0.433728840 | 4.224064099  |
| N391  | -5.003398508 | -4.451371230 | 2.433348333  |

|      |               |               |              |
|------|---------------|---------------|--------------|
| N392 | -0.498319466  | -5.899951245  | 2.802134777  |
| N393 | -5.963817354  | -2.417678309  | 1.089124494  |
| N394 | -8.181508844  | -1.043716405  | 2.028151051  |
| N395 | -7.103414756  | 1.148756555   | 3.338701372  |
| N396 | -5.567471327  | 2.738109897   | 1.604927839  |
| N397 | -3.895749956  | 0.415206764   | -1.477048358 |
| N398 | -2.328148538  | -0.218674551  | -0.119020749 |
| N399 | -6.918206867  | 4.732484107   | 0.244492843  |
| N400 | -11.256338812 | 5.180540319   | -1.632866289 |
| N401 | -11.481366188 | 7.282305036   | -2.307721335 |
| N402 | 8.548296546   | 4.268353169   | -3.508171749 |
| N403 | 3.667735632   | 5.001807697   | -7.728734649 |
| N404 | 1.131988275   | 3.174987841   | -9.521012604 |
| N405 | -1.083664217  | 2.021889645   | -8.203619355 |
| N406 | -5.173100902  | -0.039739763  | -6.225929030 |
| N407 | -5.671947670  | 0.129038935   | -8.509239224 |
| N408 | -6.681949474  | 1.554296709   | -6.989079365 |
| N409 | -1.363222667  | 3.288412774   | -5.663056764 |
| N410 | -1.520904122  | 6.000702476   | -6.392336953 |
| N411 | -3.648871243  | 7.060338551   | -7.948764903 |
| N412 | -4.954716307  | 4.155186040   | -8.337287650 |
| N413 | -5.982195288  | 8.169180691   | -6.962222226 |
| N414 | 3.658540098   | -10.662794173 | -4.078934767 |
| N415 | 1.915516037   | -7.540140876  | -3.570792147 |
| N416 | 0.156304377   | -5.462131898  | -4.914427402 |
| N417 | 1.430412266   | -4.274708610  | -7.211051532 |
| N418 | -2.189775260  | -9.829853440  | -3.203422653 |
| N419 | -4.024914473  | -7.639654557  | -3.129700277 |
| N420 | 8.796177602   | -8.328268854  | -1.149633913 |
| N421 | 4.956464301   | -6.537112725  | 0.074403828  |
| N422 | 4.410644084   | -8.643206499  | -0.270485867 |
| N423 | 10.449028576  | -6.281409931  | 0.547285127  |
| N424 | -0.778124332  | 0.922698884   | -2.616531116 |
| N425 | 0.156493113   | 0.280187629   | -2.646561988 |
| O426 | -4.436196084  | -2.258810431  | 6.878688839  |
| O427 | -5.613493971  | 1.165619207   | 7.184932379  |
| O428 | -3.093066029  | 1.694357694   | 9.877084860  |
| O429 | -0.521309377  | 1.017630753   | 7.313518294  |
| O430 | -1.724228857  | 3.314364301   | 4.841523848  |
| O431 | -1.774761559  | 5.985714849   | 7.272202562  |
| O432 | 1.450365689   | 5.209280978   | 9.633191427  |
| O433 | 3.948509715   | 2.834122058   | 6.510967069  |
| O434 | 2.763512133   | 5.715612086   | 3.684597961  |
| O435 | 1.290767833   | 8.905964710   | 4.414266753  |
| O436 | 2.698651367   | 9.908704565   | 7.530408558  |
| O437 | 10.030904973  | -3.938114884  | 6.466048491  |
| O438 | 10.613011669  | 0.709555644   | 6.124178887  |
| O439 | 13.097011197  | 1.747415933   | 2.061482105  |
| O440 | -5.002375119  | -0.817297970  | 2.421957771  |
| O441 | -2.688457141  | -6.082349167  | 2.222910602  |
| O442 | -8.306689417  | 0.207125967   | 0.120282317  |
| O443 | -7.505830434  | -1.159783468  | -2.072305488 |
| O444 | -9.203524197  | 1.953386189   | 3.818699104  |
| O445 | -5.044304563  | 4.179851939   | 3.298056597  |
| O446 | -4.947612751  | 5.728653052   | -0.346552719 |
| O447 | -7.651989068  | 8.187888898   | -0.039785619 |
| O448 | 10.676559784  | 3.988291033   | -0.703563447 |
| O449 | 2.530068003   | 6.325704276   | -2.499594234 |
| O450 | 0.781529390   | 4.886892333   | -8.059304531 |
| O451 | -2.506628694  | 3.212493051   | -9.556145298 |
| O452 | -3.579631248  | 2.735123055   | -5.746243273 |
| O453 | -2.535533310  | 6.474398994   | -4.392860132 |

|  |                                      |              |              |               |
|--|--------------------------------------|--------------|--------------|---------------|
|  | O454                                 | 0.732550701  | 4.990695084  | -4.367794665  |
|  | O455                                 | -2.518338449 | 9.032533772  | -8.217144714  |
|  | O456                                 | -6.745286621 | 8.676835471  | -9.050811965  |
|  | O457                                 | -6.983500001 | 5.202263512  | -8.459869286  |
|  | O458                                 | -8.197921206 | 10.884296069 | -6.167701986  |
|  | O459                                 | -7.405501870 | 2.630711147  | -4.234499627  |
|  | O460                                 | 1.730220590  | -9.534697086 | -2.440441703  |
|  | O461                                 | -1.304299995 | -7.128958239 | -4.332788887  |
|  | O462                                 | -0.589084774 | -4.203968518 | -8.274408208  |
|  | O463                                 | 3.389239296  | -4.269221886 | -10.262122916 |
|  | O464                                 | -5.230329890 | -8.896042807 | -1.654072002  |
|  | O465                                 | -0.247350249 | -8.801275589 | 1.769339710   |
|  | O466                                 | 1.142288709  | -8.787567085 | 0.024932748   |
|  | O467                                 | -5.591841502 | -5.421107874 | -5.406889051  |
|  | O468                                 | 10.300874349 | -5.373618979 | -1.523309709  |
|  | O469                                 | 13.632888051 | -4.962499543 | -0.461870700  |
|  | O470                                 | 1.600741214  | -4.473451388 | 4.521801951   |
|  | O471                                 | 2.815446347  | -4.934169124 | 6.326686611   |
|  | O472                                 | 7.458326531  | -8.764347175 | 4.462754969   |
|  | O473                                 | 5.273939732  | -9.155558131 | 4.889910381   |
|  | O474                                 | 6.243331023  | -4.104611794 | 1.857824603   |
|  | O475                                 | 6.920493439  | -4.140346748 | 4.007282526   |
|  | O476                                 | 3.924449950  | -5.210693511 | 2.351668706   |
|  | O477                                 | 10.578024069 | -2.537835227 | 2.385891114   |
|  | O478                                 | 8.072176886  | -2.092726627 | 1.109651600   |
|  | O479                                 | -5.947688024 | 0.557508281  | -3.531997715  |
|  | O480                                 | 10.164221163 | -7.520375793 | 3.638777397   |
|  | O481                                 | 9.584565550  | -4.704608786 | 3.850124451   |
|  | S482                                 | 2.013979172  | 1.320762285  | -6.830512690  |
|  | S483                                 | 1.153115839  | -1.645829144 | -4.744784427  |
|  | S484                                 | 2.217844050  | -4.271297866 | -0.370444580  |
|  | S485                                 | 2.854604512  | 1.180065952  | -3.241871529  |
|  | S486                                 | 0.214921399  | -1.795203725 | 1.033408818   |
|  | S487                                 | 3.296580946  | -4.623259094 | -4.119992456  |
|  | S488                                 | 4.013862887  | -1.993057865 | 1.328255311   |
|  | S489                                 | 4.646031882  | -1.204001588 | -5.111050282  |
|  | S490                                 | 5.806667959  | -3.869964271 | -1.365691723  |
|  | S491                                 | 6.084331685  | -0.229972886 | -1.487340457  |
|  | <b>24, 35(2)</b>                     |              |              |               |
|  | <b>Fe1 2.88</b>                      |              |              |               |
|  | <b>Fe2 -1.09</b>                     |              |              |               |
|  | <b>Fe3 -2.21</b>                     |              |              |               |
|  | <b>Fe4 2.79</b>                      |              |              |               |
|  | <b>Fe5 -2.44</b>                     |              |              |               |
|  | <b>Fe6 0.27</b>                      |              |              |               |
|  | <b>Fe7 2.39</b>                      |              |              |               |
|  | <b>bm2unh2b2n2x263b26n2n35.car_1</b> |              |              |               |
|  | C1                                   | -5.487977945 | -2.882052439 | 7.107437866   |
|  | C2                                   | -5.504011838 | -4.370540397 | 7.468042363   |
|  | C3                                   | -6.834542772 | -0.860630352 | 6.741339502   |
|  | C4                                   | -6.093278901 | 0.119139493  | 7.649693533   |
|  | C5                                   | -5.260248697 | 0.631269216  | 9.888150755   |
|  | C6                                   | -3.752223862 | 0.675496011  | 9.618374955   |
|  | C7                                   | -1.808806267 | -0.498643672 | 8.699261062   |
|  | C8                                   | -1.531164992 | 0.303339799  | 7.423438781   |
|  | C9                                   | -2.322314434 | 0.995170426  | 5.222263328   |
|  | C10                                  | -2.428383375 | 2.508505429  | 5.471391377   |
|  | C11                                  | -3.444703361 | 4.320267253  | 6.724533519   |
|  | C12                                  | -2.273068445 | 4.880308608  | 7.544134160   |
|  | C13                                  | -0.882041028 | 4.639497912  | 9.542392335   |
|  | C14                                  | 0.599856355  | 4.407248956  | 9.220997517   |
|  | C15                                  | 2.282600135  | 2.900278015  | 8.246382913   |
|  | C16                                  | 2.759924529  | 3.039378913  | 6.796425914   |
|  | C17                                  | 2.039863621  | 3.536045667  | 4.463178254   |
|  | C18                                  | 1.819140328  | 5.005397668  | 4.055725939   |
|  | C19                                  | 1.209215113  | 2.525762792  | 3.644682637   |
|  | C20                                  | 1.206186081  | 2.897093312  | 2.161764673   |
|  | C21                                  | 1.732593818  | 1.107872843  | 3.891526893   |
|  | C22                                  | 0.225639460  | 6.838437910  | 3.693288327   |

|     |               |              |               |
|-----|---------------|--------------|---------------|
| C23 | 0.690883652   | 7.869719726  | 4.737009240   |
| C24 | -1.272584417  | 6.980289505  | 3.330608601   |
| C25 | -1.618827891  | 8.432354864  | 2.981321813   |
| C26 | -1.639229401  | 6.051891749  | 2.163871911   |
| C27 | 0.774964824   | 8.529642212  | 7.069901910   |
| C28 | 2.247858388   | 8.885437352  | 7.035121992   |
| C29 | 9.668321646   | -3.247453088 | 8.738484625   |
| C30 | 9.714112768   | -3.002634188 | 7.232940663   |
| C31 | 9.306218580   | -1.238312400 | 5.510916710   |
| C32 | 10.444526935  | -0.219063408 | 5.315990263   |
| C33 | 7.926511283   | -0.608376219 | 5.260033899   |
| C34 | 7.778936707   | -0.006628907 | 3.862527316   |
| C35 | 6.315097639   | 0.283665142  | 3.533766237   |
| C36 | 5.629455048   | 1.977541500  | 1.818532372   |
| C37 | 12.360611489  | 0.408268681  | 3.924557552   |
| C38 | 12.166086423  | 1.283634636  | 2.705011389   |
| C39 | -4.383286751  | -3.162023535 | 2.778052993   |
| C40 | -5.135406903  | -2.011407145 | 2.089915825   |
| C41 | -2.899411498  | -3.101852500 | 2.372344269   |
| C42 | -1.941866853  | -3.976710388 | 3.204725766   |
| C43 | -1.746400833  | -5.401779278 | 2.694796078   |
| C44 | -6.595577206  | -1.476156106 | 0.188682881   |
| C45 | -7.787344958  | -0.715558384 | 0.782074389   |
| C46 | -6.992450630  | -2.133135546 | -1.149204352  |
| C47 | -9.096990420  | -0.201803517 | 2.780911050   |
| C48 | -8.469177627  | 1.074856976  | 3.359564499   |
| C49 | -6.404339684  | 2.296374995  | 3.894594468   |
| C50 | -5.608586521  | 3.153778412  | 2.911096485   |
| C51 | -4.828698919  | 3.495891163  | 0.603622066   |
| C52 | -5.565082840  | 4.781226798  | 0.151086706   |
| C53 | -4.579138262  | 2.674957360  | -0.671716716  |
| C54 | -3.757455129  | 1.430317499  | -0.541884103  |
| C55 | -2.763330705  | 1.016835990  | 0.312718857   |
| C56 | -3.019327697  | -0.568860204 | -1.209709674  |
| C57 | -7.784220767  | 5.769609344  | -0.307215665  |
| C58 | -7.553097385  | 7.075621548  | 0.451644539   |
| C59 | -9.247585889  | 5.291537706  | -0.166510263  |
| C60 | -10.248769256 | 5.944412422  | -1.073579865  |
| C61 | -10.376496163 | 7.257729923  | -1.483098792  |
| C62 | -11.979959395 | 6.011075095  | -2.370288129  |
| C63 | 8.708714001   | 4.416149766  | -2.059243901  |
| C64 | 9.939315399   | 3.648068757  | -1.614290855  |
| C65 | 7.505473419   | 3.799166434  | -1.301234807  |
| C66 | 6.197602892   | 4.491133578  | -1.606126345  |
| C67 | 5.783232933   | 5.624508688  | -0.883712946  |
| C68 | 5.350605619   | 4.010855797  | -2.621652429  |
| C69 | 4.564983759   | 6.256748969  | -1.158122228  |
| C70 | 4.138590545   | 4.637898685  | -2.915011548  |
| C71 | 3.745989564   | 5.759390801  | -2.180276929  |
| C72 | 2.931597177   | 3.747721375  | -7.959953645  |
| C73 | 1.523570571   | 3.998633858  | -8.512600586  |
| C74 | 2.849092045   | 2.954222023  | -6.644453248  |
| C75 | -0.184977695  | 3.282219692  | -10.121757037 |
| C76 | -1.359047911  | 2.837721046  | -9.250614523  |
| C77 | -2.128604222  | 1.572761559  | -7.285012481  |
| C78 | -2.419723257  | 2.587790826  | -6.162025820  |
| C79 | -1.753898109  | 0.183043923  | -6.738170375  |
| C80 | -2.734059730  | -0.479682250 | -5.762730964  |
| C81 | -4.064018752  | -0.994048556 | -6.343572483  |
| C82 | -5.849355665  | 0.515173679  | -7.231736782  |
| C83 | -1.565522816  | 4.273549263  | -4.607674934  |
| C84 | -1.928925753  | 5.679093701  | -5.128144441  |

|       |              |              |              |
|-------|--------------|--------------|--------------|
| C85   | -0.360436432 | 4.383993154  | -3.668800065 |
| C86   | -1.470724484 | 7.386221115  | -6.822162539 |
| C87   | -2.587632925 | 7.892920118  | -7.731985533 |
| C88   | -4.687930016 | 7.400541951  | -8.916886336 |
| C89   | -5.902633469 | 8.141936419  | -8.315641480 |
| C90   | -5.147276030 | 6.159357179  | -9.713907824 |
| C91   | -5.793843722 | 5.115760125  | -8.809932957 |
| C92   | -7.139200102 | 8.715644048  | -6.266752645 |
| C93   | -7.193669374 | 10.232796830 | -6.405046390 |
| C94   | -7.090460289 | 8.319293394  | -4.766202264 |
| C95   | -7.175201713 | 6.824107547  | -4.554194822 |
| C96   | -8.422569910 | 6.179876776  | -4.523135543 |
| C97   | -6.019406381 | 6.034797214  | -4.425792285 |
| C98   | -8.518844820 | 4.792729103  | -4.391159434 |
| C99   | -6.094933305 | 4.642638379  | -4.314319711 |
| C100  | -7.350127773 | 4.035401252  | -4.304857879 |
| C101  | 3.646479365  | -9.211804767 | -3.870291519 |
| C102  | 2.332717894  | -8.778036275 | -3.242700475 |
| C103  | 0.730729481  | -6.886508777 | -3.028799415 |
| C104  | -0.241630348 | -6.499734538 | -4.148782571 |
| C105  | -0.644202549 | -4.999545123 | -6.039070724 |
| C106  | 0.081069807  | -4.465963898 | -7.269972579 |
| C107  | 2.124484711  | -3.628919224 | -8.312411420 |
| C108  | 2.687367885  | -4.602983767 | -9.327948442 |
| C109  | -2.904127519 | -9.502736278 | -1.961610691 |
| C110  | -4.159403258 | -8.660632214 | -2.235547249 |
| C111  | -2.066584881 | -8.846793283 | -0.839625963 |
| C112  | -1.032185997 | -9.834883241 | -0.269290537 |
| C113  | -0.028069487 | -9.118658326 | 0.604833012  |
| C114  | -5.138159211 | -6.748263203 | -3.417257702 |
| C115  | -5.180437308 | -6.458885183 | -4.906021573 |
| C116  | -5.206860315 | -5.489905518 | -2.514840603 |
| C117  | -3.866433151 | -4.823404792 | -2.318802229 |
| C118  | -3.347848360 | -3.919697019 | -3.262554537 |
| C119  | -3.074355125 | -5.158487669 | -1.207860282 |
| C120  | -2.062375216 | -3.386871180 | -3.104974245 |
| C121  | -1.788421702 | -4.630574942 | -1.053517015 |
| C122  | -1.274385643 | -3.747443165 | -2.006692179 |
| C123  | 8.519167151  | -6.901889762 | -0.897628945 |
| C124  | 9.809687079  | -6.102431214 | -0.645094135 |
| C125  | 7.500649933  | -6.716548086 | 0.241832962  |
| C126  | 6.134159687  | -7.284854690 | -0.002803034 |
| C127  | 5.792122523  | -8.603516229 | -0.228645689 |
| C128  | 3.947854799  | -7.384818742 | -0.076820521 |
| C129  | 11.667076169 | -5.532685016 | 0.813716227  |
| C130  | 12.716005908 | -5.744425934 | -0.255548452 |
| C131  | 2.703539643  | -4.444554832 | 5.046004570  |
| C132  | 3.968686020  | -3.923850587 | 4.418929495  |
| C133  | 4.685810054  | -4.976245059 | 3.482842066  |
| C134  | 4.959734521  | -6.277391780 | 4.286915798  |
| C135  | 5.784438255  | -7.298677515 | 3.488298926  |
| C136  | 6.280334733  | -8.453749609 | 4.312366812  |
| C137  | 6.069202304  | -4.353333328 | 3.119891169  |
| C138  | 3.271392052  | -1.894431908 | -2.090694734 |
| Fe139 | 3.585540543  | -3.850721158 | -2.002465585 |
| Fe140 | 1.659162942  | -0.686815306 | -2.795605484 |
| Fe141 | 4.337268356  | -0.493474661 | -2.961697991 |
| Fe142 | 3.105222825  | -2.472321432 | -4.055667026 |
| Fe143 | 2.769974894  | 0.055810195  | -5.071854875 |
| Fe144 | 4.806537457  | -1.920553676 | -0.837701559 |
| Fe145 | 2.122268238  | -1.820375989 | -0.442399888 |
| H146  | -3.482032592 | -4.634631266 | 7.489351340  |

|      |              |               |              |
|------|--------------|---------------|--------------|
| H147 | -4.190228408 | -5.175725849  | 6.121104926  |
| H148 | -7.540658112 | -2.818847125  | 7.232015383  |
| H149 | -6.381441709 | -4.846901300  | 7.002976249  |
| H150 | -5.672620697 | -4.421533975  | 8.558264688  |
| H151 | -6.445177147 | -0.690438088  | 5.727427682  |
| H152 | -6.422909718 | -1.077583782  | 9.285408581  |
| H153 | -7.902673257 | -0.602712063  | 6.748623559  |
| H154 | -5.427938856 | 0.256315677   | 10.906318651 |
| H155 | -3.814166224 | -1.211874280  | 8.810878038  |
| H156 | -5.621591677 | 1.666221478   | 9.836666675  |
| H157 | -1.344750573 | 0.823912374   | 4.751609584  |
| H158 | -3.227251720 | -0.464089262  | 6.523878612  |
| H159 | -1.524840026 | -1.548131783  | 8.539114867  |
| H160 | -3.499515974 | 4.906155061   | 5.798781412  |
| H161 | -3.961902441 | 2.232405691   | 6.834540576  |
| H162 | -1.167606852 | -0.081499573  | 9.484847311  |
| H163 | -3.103198847 | 0.677141954   | 4.516519899  |
| H164 | -2.353801186 | 3.262626644   | 8.832940385  |
| H165 | -4.375195776 | 4.469143183   | 7.289634677  |
| H166 | 1.759788823  | 0.875710479   | 4.966424569  |
| H167 | 1.084289116  | 0.361009639   | 3.409775204  |
| H168 | 2.746121072  | 0.981096826   | 3.480879700  |
| H169 | 0.172211569  | 2.581527866   | 4.009965624  |
| H170 | -1.080005116 | 4.181662554   | 10.522817082 |
| H171 | -1.491514282 | 4.991664742   | 2.412754568  |
| H172 | -0.203106162 | 6.806304788   | 6.286184429  |
| H173 | -1.442358118 | 9.119700629   | 3.820804284  |
| H174 | 0.649187207  | 2.150766759   | 1.578193089  |
| H175 | 2.224620199  | 2.926918521   | 1.750606324  |
| H176 | 8.826874661  | 5.462356795   | -1.717080555 |
| H177 | -2.697453470 | 6.187035913   | 1.895825331  |
| H178 | -2.679305520 | 8.504431341   | 2.698305439  |
| H179 | -1.030144085 | 6.290590104   | 1.276813782  |
| H180 | -1.015296566 | 8.781436261   | 2.128114006  |
| H181 | -1.866057242 | 6.684276002   | 4.214299132  |
| H182 | 0.828319545  | 7.060479602   | 2.799231159  |
| H183 | -0.228209086 | 4.840284364   | 4.355853044  |
| H184 | 0.736633554  | 3.875927231   | 1.985481982  |
| H185 | -0.105309964 | 3.373565804   | -3.308184262 |
| H186 | -0.672715641 | 4.997949061   | -2.808964478 |
| H187 | 1.311459250  | 5.413084171   | -3.696595227 |
| H188 | 2.339573036  | 7.068565971   | -1.892808351 |
| H189 | 3.482879009  | 4.236338523   | -3.688557053 |
| H190 | 5.626713727  | 3.109226168   | -3.172743572 |
| H191 | 6.413559739  | 6.014602622   | -0.079661027 |
| H192 | 0.854742551  | 3.494912440   | 6.247748840  |
| H193 | 2.439884980  | 1.850075332   | 8.536738200  |
| H194 | 2.938741416  | 3.524660673   | 8.866817979  |
| H195 | 0.175983231  | 2.596971224   | 8.291566130  |
| H196 | -1.007494624 | 5.725265399   | 9.638230798  |
| H197 | 4.249107740  | 7.124238421   | -0.572446307 |
| H198 | 3.109618994  | 3.347196393   | 4.308673954  |
| H199 | 0.184028558  | 9.458815459   | 7.027311823  |
| H200 | 0.585091572  | 8.053244251   | 8.044877285  |
| H201 | 2.910316758  | 8.114758223   | 6.576452920  |
| H202 | 13.276240617 | -0.189210704  | 3.798306269  |
| H203 | -0.319149466 | -6.857527929  | 2.491154587  |
| H204 | 3.741028143  | -4.836004521  | 6.623856458  |
| H205 | -1.548148847 | -10.586139794 | 0.346149995  |
| H206 | -0.513958507 | -10.354902093 | -1.088089702 |
| H207 | -2.720424246 | -8.505367707  | -0.022769545 |
| H208 | -4.825981853 | -7.304218330  | -5.541277852 |

|      |               |               |               |
|------|---------------|---------------|---------------|
| H209 | -3.310275067  | -10.446129220 | -1.562836843  |
| H210 | -2.809439609  | -3.356781312  | 1.305473519   |
| H211 | -2.298432356  | -4.049903169  | 4.246968261   |
| H212 | -3.103850279  | -7.422316104  | -3.520132805  |
| H213 | -6.050607621  | -7.348223850  | -3.224452598  |
| H214 | -1.651998507  | -9.028594530  | -3.546764741  |
| H215 | 0.278079291   | -5.342739906  | 3.166659768   |
| H216 | -1.573679846  | -7.949235558  | -1.243114833  |
| H217 | -1.525459389  | -10.587336270 | -3.028035334  |
| H218 | -5.656644620  | -4.745397263  | 3.161538374   |
| H219 | -2.569944384  | -2.058853409  | 2.476828531   |
| H220 | 1.209832947   | -9.103837493  | -0.931076015  |
| H221 | -0.964367064  | -3.474968036  | 3.239747248   |
| H222 | -3.878901558  | 3.831826817   | 1.043744375   |
| H223 | -2.335955687  | 1.497382947   | 1.184592114   |
| H224 | -7.154565651  | 2.951855579   | 4.357384853   |
| H225 | -6.544842561  | 0.347959440   | 3.025888190   |
| H226 | -7.343187234  | 3.945940298   | 0.731871695   |
| H227 | -9.786370749  | 8.144796213   | -1.284252912  |
| H228 | -7.297297511  | 6.930280134   | 1.529620791   |
| H229 | -9.556358896  | 5.379332342   | 0.890605170   |
| H230 | -7.535767288  | 5.934272498   | -1.367558135  |
| H231 | -12.856574011 | 5.751956576   | -2.958367850  |
| H232 | -4.090464644  | 3.349425438   | -1.393245528  |
| H233 | -5.552167727  | 2.406677509   | -1.115418656  |
| H234 | -11.851815162 | 8.095456453   | -2.786847040  |
| H235 | -9.263218385  | 4.216247633   | -0.404837289  |
| H236 | -5.987885519  | 1.842833152   | 1.363063930   |
| H237 | -5.720538585  | 1.980867895   | 4.696524410   |
| H238 | -9.930175247  | 0.115726625   | 2.140792914   |
| H239 | -2.880385130  | -1.482613231  | -1.780665517  |
| H240 | -9.514789723  | -0.785506952  | 3.611708496   |
| H241 | 9.216368825   | 4.868026866   | -3.991570119  |
| H242 | 7.618124534   | 4.593147138   | -3.783480406  |
| H243 | -0.412761951  | 3.045872592   | -5.951233666  |
| H244 | -2.426998299  | 3.942578700   | -4.010828362  |
| H245 | -0.862712996  | 5.364388552   | -6.858192759  |
| H246 | -4.558644624  | 0.449375767   | -2.285724914  |
| H247 | -6.547107827  | -0.102306022  | -3.087542098  |
| H248 | -6.443853111  | 1.408740457   | -3.576420141  |
| H249 | -6.103374889  | -2.592410894  | -1.602853490  |
| H250 | -7.743613156  | -2.921277447  | -0.972808453  |
| H251 | -4.278477690  | 5.752473041   | -10.251021610 |
| H252 | -5.893593185  | 6.491161757   | -10.447000355 |
| H253 | -4.052615205  | 3.927529793   | -8.780306210  |
| H254 | -5.335086806  | 3.469366692   | -7.688550623  |
| H255 | -6.210921802  | 0.581234226   | -9.246050220  |
| H256 | -4.373349237  | -1.906022141  | -5.812368251  |
| H257 | -9.497778325  | 4.306813942   | -4.362334852  |
| H258 | -5.029584111  | 6.499405252   | -4.404526422  |
| H259 | -6.841553005  | 1.869826200   | -6.032019189  |
| H260 | -0.775864897  | 0.250973532   | -6.234651718  |
| H261 | -0.104607421  | 1.791035755   | -7.974071083  |
| H262 | -2.934207425  | 0.176096513   | -4.901506182  |
| H263 | -7.723429549  | -1.826850198  | 2.482164248   |
| H264 | -0.200962135  | 2.679674995   | -11.040083616 |
| H265 | -5.971721314  | -3.442912386  | 0.970070183   |
| H266 | -1.605745239  | -0.480685937  | -7.605773326  |
| H267 | -5.186428995  | 4.039254951   | -4.271777467  |
| H268 | -8.031062888  | -0.524392842  | -1.520577787  |
| H269 | -0.388136193  | 4.325769918   | -10.401732532 |
| H270 | -5.293828384  | -0.786115371  | -8.727952942  |



|      |              |               |              |
|------|--------------|---------------|--------------|
| H271 | -7.444189570 | 1.725898161   | -7.643983739 |
| H272 | -4.263810447 | -5.171492225  | 2.344128352  |
| H273 | -4.438237968 | -2.934124760  | 3.859956019  |
| H274 | -9.339481043 | 6.767937938   | -4.600315847 |
| H275 | -5.866943607 | -0.678650809  | -0.033273332 |
| H276 | -3.061722614 | 1.518221379   | -7.861727163 |
| H277 | -3.923415577 | -1.280488111  | -7.393938478 |
| H278 | -2.200723781 | -1.352406803  | -5.361037023 |
| H279 | -5.443868116 | 0.230186261   | -5.264823261 |
| H280 | -1.470461212 | 8.038938414   | -5.936211008 |
| H281 | -3.577438938 | 6.097435012   | -7.609194083 |
| H282 | -4.243298690 | 8.115672201   | -9.623665525 |
| H283 | -0.527562952 | 7.551113785   | -7.360482162 |
| H284 | -5.254439117 | 7.697893177   | -6.432407681 |
| H285 | 3.792530498  | -8.698843834  | -4.831907030 |
| H286 | 4.440938300  | -8.845105608  | -3.188040357 |
| H287 | 8.096041770  | -6.476044235  | -1.818869877 |
| H288 | 4.617832094  | -10.956908220 | -4.280887984 |
| H289 | 3.395892037  | -11.119431969 | -3.201737494 |
| H290 | 3.874167082  | 2.795010566   | -6.287081816 |
| H291 | 3.058127034  | 5.637455108   | -7.208835376 |
| H292 | 1.744090155  | 2.415835881   | -9.797620336 |
| H293 | 2.302317367  | 3.547904061   | -5.896627535 |
| H294 | 3.839550777  | 5.454864083   | -8.631074713 |
| H295 | 2.946793414  | -3.017110257  | -7.910744867 |
| H296 | 3.499417538  | 3.147749340   | -8.688170523 |
| H297 | 7.741121591  | 0.160101786   | 6.028526524  |
| H298 | 9.446632997  | -2.086414624  | 4.829908930  |
| H299 | 1.938030725  | -4.397639997  | -6.339192222 |
| H300 | 5.052979058  | 3.113386217   | 0.215223223  |
| H301 | -1.273022682 | -5.836887426  | -6.369052996 |
| H302 | -1.177536321 | -4.914829596  | -0.193836591 |
| H303 | -1.331231932 | -4.198677705  | -5.720175742 |
| H304 | 5.874532750  | 0.993781532   | 4.246011173  |
| H305 | 0.985770572  | -4.931919466  | -4.599533031 |
| H306 | 5.724202304  | -0.642768363  | 3.611642171  |
| H307 | 7.182878392  | -1.408403222  | 5.405144549  |
| H308 | 8.161803130  | -0.706230229  | 3.104537030  |
| H309 | 8.365474409  | 0.921918821   | 3.776203239  |
| H310 | -5.609179560 | -5.806097130  | -1.541568262 |
| H311 | 9.181760556  | -1.124899493  | 7.658285979  |
| H312 | 8.791048018  | -3.887298326  | 8.916792096  |
| H313 | -0.268809057 | -3.337447844  | -1.893978087 |
| H314 | 10.458540905 | -1.646287678  | 9.766239846  |
| H315 | 9.063726762  | -2.211902057  | 10.411947523 |
| H316 | 6.268315464  | 0.112743195   | 1.415798620  |
| H317 | -1.646337435 | -2.696049893  | -3.841733923 |
| H318 | -3.465428091 | -5.840072976  | -0.449572168 |
| H319 | 9.972006001  | -6.556013536  | 3.768595917  |
| H320 | 7.912406193  | -7.181178489  | 1.155716558  |
| H321 | 8.606675408  | -4.507649801  | 3.784690957  |
| H322 | 9.323369006  | -7.951750637  | 3.893327324  |
| H323 | 2.413882129  | -5.673726411  | -9.163996452 |
| H324 | 7.480337925  | -2.842007152  | 1.377320662  |
| H325 | 4.682005902  | -3.590953102  | 5.187087067  |
| H326 | 2.552749798  | -6.922185437  | -4.086450332 |
| H327 | 5.503789080  | -6.005988374  | 5.204737627  |
| H328 | 3.839934507  | -9.472338581  | -0.384967247 |
| H329 | 2.896083674  | -7.128993634  | -0.039837452 |
| H330 | 10.556316962 | -3.854161166  | 8.986102061  |
| H331 | 5.378020848  | 1.418081960   | -0.155890051 |
| H332 | 9.781173685  | -2.332235684  | 1.831010801  |

|       |              |              |              |
|-------|--------------|--------------|--------------|
| H333  | 7.850913245  | -1.944641893 | 0.166458066  |
| H334  | 10.994586282 | -1.220725317 | 3.578250683  |
| H335  | 5.963495200  | 2.950743787  | 3.600825706  |
| H336  | 5.695606058  | -9.879274048 | 5.409498626  |
| H337  | 5.168889441  | -7.686964935 | 2.662723499  |
| H338  | 6.671071411  | -6.825487777 | 3.051867585  |
| H339  | 3.999050978  | -6.729352494 | 4.574296489  |
| H340  | 1.043093126  | -6.000531514 | -2.451972834 |
| H341  | -3.953471326 | -3.650796934 | -4.131867725 |
| H342  | -5.933514812 | -4.803323684 | -2.975611330 |
| H343  | 3.702597832  | -3.070917535 | 3.780722450  |
| H344  | 10.298237206 | -3.356280156 | 2.874696500  |
| H345  | 9.795283185  | -4.424847877 | 4.776023292  |
| H346  | 5.095819258  | 3.855736014  | 2.424801902  |
| H347  | 6.408412347  | -9.484692501 | -0.358686775 |
| H348  | 7.397175582  | -5.645864740 | 0.458563902  |
| H349  | 0.218121258  | -7.589242841 | -2.368185146 |
| H350  | 1.432606205  | -2.952982673 | -8.839816941 |
| H351  | 7.723893303  | 3.862499062  | -0.224536494 |
| H352  | 7.432436559  | 2.732425896  | -1.567625629 |
| H353  | 9.405246407  | -8.403105352 | -1.976939489 |
| H354  | 9.332191048  | -8.722686754 | -0.374802053 |
| H355  | 12.089845079 | -5.906408449 | 1.760172636  |
| H356  | 10.050476163 | -6.825962899 | 1.311941601  |
| H357  | 12.641043893 | -6.713101197 | -0.806246048 |
| H358  | 11.477425476 | -4.454315277 | 0.936088149  |
| H359  | 10.116484185 | 2.700787751  | -2.179929032 |
| H360  | -6.235872628 | 10.715563006 | -6.711546231 |
| H361  | 12.511598061 | 1.084097777  | 4.784209758  |
| H362  | 11.103446946 | 1.497806718  | 2.434514695  |
| H363  | -8.062018532 | 8.314102102  | -6.716810390 |
| H364  | -6.164257056 | 8.715743253  | -4.320552222 |
| H365  | -7.932670712 | 8.824538255  | -4.271889177 |
| H366  | -8.342007370 | 2.367186517  | -4.150603589 |
| H367  | 0.461617770  | -0.658609710 | 1.714412391  |
| H368  | 2.639827335  | -1.973684829 | 1.388743010  |
| H369  | -1.486819690 | -0.775756604 | 0.260510575  |
| H370  | 0.984578566  | -1.710847683 | -1.558972656 |
| Mo371 | 4.464317825  | -4.298353194 | 0.545782940  |
| N372  | 2.375174551  | 1.062997086  | 0.010834533  |
| N373  | 2.241367545  | -0.033874604 | -0.216143161 |
| N374  | -4.307914849 | -5.124902919 | 7.135897198  |
| N375  | -6.699068668 | -2.258438078 | 7.123657940  |
| N376  | -5.995688098 | -0.213718810 | 8.959915222  |
| N377  | -3.200856861 | -0.458414212 | 9.118194968  |
| N378  | -2.454373799 | 0.197488750  | 6.433422683  |
| N379  | -3.318289471 | 2.905849501  | 6.412608622  |
| N380  | -1.854710164 | 4.123298871  | 8.592418920  |
| N381  | 0.905284957  | 3.282790043  | 8.511696422  |
| N382  | 1.803676732  | 3.381443304  | 5.897187054  |
| N383  | 0.538790674  | 5.472821269  | 4.118770337  |
| N384  | 0.409977096  | 7.584149499  | 6.033938423  |
| N385  | 9.535694903  | -2.016533286 | 9.528081337  |
| N386  | 9.368467119  | -1.754404254 | 6.869856207  |
| N387  | 6.147081426  | 0.792594153  | 2.171111388  |
| N388  | 5.426496872  | 2.949049258  | 2.739756692  |
| N389  | 5.261172381  | 2.177643296  | 0.551208587  |
| N390  | 11.219569638 | -0.433965763 | 4.223967539  |
| N391  | -5.003001285 | -4.449211140 | 2.433721030  |
| N392  | -0.498208671 | -5.897299238 | 2.800972173  |
| N393  | -5.965673085 | -2.416084553 | 1.090575414  |
| N394  | -8.183796030 | -1.041449148 | 2.028337695  |

|      |               |               |              |
|------|---------------|---------------|--------------|
| N395 | -7.104916714  | 1.149245132   | 3.341138640  |
| N396 | -5.568732006  | 2.737466031   | 1.606254582  |
| N397 | -3.898699993  | 0.412831571   | -1.477643370 |
| N398 | -2.332096343  | -0.222174686  | -0.118834688 |
| N399 | -6.918934132  | 4.731549632   | 0.245203787  |
| N400 | -11.255788345 | 5.176449083   | -1.634909934 |
| N401 | -11.482147345 | 7.278536427   | -2.308086257 |
| N402 | 8.547352012   | 4.265653428   | -3.505924251 |
| N403 | 3.667785730   | 4.998554563   | -7.730227999 |
| N404 | 1.129060647   | 3.177913756   | -9.523502948 |
| N405 | -1.085963564  | 2.024300959   | -8.204542268 |
| N406 | -5.174918812  | -0.039692546  | -6.229184305 |
| N407 | -5.675622813  | 0.128294677   | -8.512180095 |
| N408 | -6.682624090  | 1.555720622   | -6.992176548 |
| N409 | -1.363034050  | 3.284345703   | -5.661010099 |
| N410 | -1.520149530  | 5.996376336   | -6.390811514 |
| N411 | -3.647935743  | 7.058193955   | -7.948001607 |
| N412 | -4.953959405  | 4.153529398   | -8.341315739 |
| N413 | -5.983112797  | 8.168481566   | -6.963105898 |
| N414 | 3.658895166   | -10.663694557 | -4.080566215 |
| N415 | 1.911369731   | -7.544474167  | -3.575905463 |
| N416 | 0.156161636   | -5.462799247  | -4.918375571 |
| N417 | 1.424701392   | -4.278278555  | -7.217494296 |
| N418 | -2.191783747  | -9.832048344  | -3.202467017 |
| N419 | -4.026053441  | -7.638918019  | -3.127318830 |
| N420 | 8.798874394   | -8.326765449  | -1.155196564 |
| N421 | 4.959609528   | -6.535889253  | 0.080346006  |
| N422 | 4.414771558   | -8.642316868  | -0.269520112 |
| N423 | 10.448668891  | -6.280512250  | 0.545619025  |
| N424 | -0.765349726  | 0.938770501   | -2.573430500 |
| N425 | 0.160965316   | 0.285682540   | -2.633519083 |
| O426 | -4.434985817  | -2.258572487  | 6.877311650  |
| O427 | -5.615136865  | 1.167821106   | 7.187340768  |
| O428 | -3.091678964  | 1.694513259   | 9.877745707  |
| O429 | -0.522345259  | 1.017585304   | 7.312209467  |
| O430 | -1.726854369  | 3.313814026   | 4.838858339  |
| O431 | -1.774799168  | 5.985331466   | 7.270343211  |
| O432 | 1.448125238   | 5.206105293   | 9.639465892  |
| O433 | 3.947077583   | 2.823856943   | 6.512063145  |
| O434 | 2.766412378   | 5.717198119   | 3.690306725  |
| O435 | 1.292981889   | 8.906271815   | 4.412060419  |
| O436 | 2.699644591   | 9.907394909   | 7.530189678  |
| O437 | 10.029788960  | -3.934811131  | 6.463058662  |
| O438 | 10.612500176  | 0.711356798   | 6.123619164  |
| O439 | 13.094477389  | 1.745097371   | 2.060206272  |
| O440 | -5.003440460  | -0.815068023  | 2.422093122  |
| O441 | -2.688652461  | -6.079966316  | 2.223103784  |
| O442 | -8.310702185  | 0.205771232   | 0.118185760  |
| O443 | -7.505411635  | -1.160165719  | -2.072618270 |
| O444 | -9.204763909  | 1.955916968   | 3.819439533  |
| O445 | -5.047907602  | 4.181841078   | 3.297974437  |
| O446 | -4.947804066  | 5.727099115   | -0.346109351 |
| O447 | -7.653802994  | 8.186449635   | -0.038303771 |
| O448 | 10.673095151  | 3.992648870   | -0.699060379 |
| O449 | 2.529460017   | 6.329357066   | -2.499309926 |
| O450 | 0.781260589   | 4.892826230   | -8.063613689 |
| O451 | -2.508878514  | 3.211101756   | -9.560433570 |
| O452 | -3.580841234  | 2.738531986   | -5.747525526 |
| O453 | -2.533424439  | 6.470878785   | -4.390902749 |
| O454 | 0.735890296   | 4.983621121   | -4.362577807 |
| O455 | -2.516057734  | 9.029970411   | -8.213970267 |
| O456 | -6.741532122  | 8.678937028   | -9.052484664 |

|      |              |              |               |
|------|--------------|--------------|---------------|
| O457 | -6.981775694 | 5.202397879  | -8.461525312  |
| O458 | -8.197653150 | 10.885585628 | -6.171303294  |
| O459 | -7.405571340 | 2.632254632  | -4.235052349  |
| O460 | 1.730237866  | -9.536815194 | -2.439427917  |
| O461 | -1.304081384 | -7.130376265 | -4.337533906  |
| O462 | -0.598184004 | -4.197859349 | -8.274910645  |
| O463 | 3.389496454  | -4.257677551 | -10.264303682 |
| O464 | -5.230679832 | -8.895563466 | -1.651505357  |
| O465 | -0.246402445 | -8.799523133 | 1.769393316   |
| O466 | 1.143593918  | -8.786665308 | 0.025102516   |
| O467 | -5.596742413 | -5.423009260 | -5.403721093  |
| O468 | 10.302020470 | -5.372703463 | -1.524932577  |
| O469 | 13.633098237 | -4.962589851 | -0.461973442  |
| O470 | 1.602413261  | -4.475329067 | 4.517733558   |
| O471 | 2.817089491  | -4.932531317 | 6.323577036   |
| O472 | 7.459306654  | -8.766772558 | 4.465281906   |
| O473 | 5.275400992  | -9.157566202 | 4.894608184   |
| O474 | 6.255167883  | -4.115200961 | 1.859655747   |
| O475 | 6.923500738  | -4.147963295 | 4.010781916   |
| O476 | 3.932741945  | -5.218898592 | 2.350304172   |
| O477 | 10.575436095 | -2.537544288 | 2.384285395   |
| O478 | 8.070484679  | -2.093589268 | 1.106483360   |
| O479 | -5.949629895 | 0.556862973  | -3.535135172  |
| O480 | 10.163811650 | -7.518947895 | 3.636064575   |
| O481 | 9.583802279  | -4.703250097 | 3.846991492   |
| S482 | 2.011609050  | 1.308997425  | -6.839821495  |
| S483 | 1.151399714  | -1.555554109 | -4.798668536  |
| S484 | 2.199996788  | -4.287207916 | -0.298461532  |
| S485 | 2.899172361  | 1.184499059  | -3.175377126  |
| S486 | 0.219232590  | -1.807370360 | 1.030006239   |
| S487 | 3.325660508  | -4.666750511 | -4.080937801  |
| S488 | 4.061423445  | -1.993925828 | 1.366905881   |
| S489 | 4.709962542  | -1.177209660 | -5.054178506  |
| S490 | 5.764228306  | -3.866149403 | -1.380247881  |
| S491 | 6.016839986  | -0.200428950 | -1.502927245  |
